# Supplementary material for: Early Transcriptional Changes in Rabies Virus-Infected Neurons and Their Impact on Neuronal Functions
Source: Front Microbiol. 2021 Dec 13;12:730892. doi: 10.3389/fmicb.2021.730892 (PMC8713068; doi:10.3389/fmicb.2021.730892)
Supplement: Supplementary file 2 [file Table_1.XLSX]

## Sheet: GO_interest - Go_interest_list
Go_interest_list
geneset
GO:0000083_regulation_of_transcription_involved_in_G1/S_transition_of_mitotic_cell_cycle
GO:0000122_negative_regulation_of_transcription_by_RNA_polymerase_II
GO:0000165_MAPK_cascade
GO:0000226_microtubule_cytoskeleton_organization
GO:0000281_mitotic_cytokinesis
GO:0001508_action_potential
GO:0001578_microtubule_bundle_formation
GO:0001755_neural_crest_cell_migration
GO:0001764_neuron_migration
GO:0001771_immunological_synapse_formation
GO:0001774_microglial_cell_activation
GO:0001778_plasma_membrane_repair
GO:0001816_cytokine_production
GO:0001817_regulation_of_cytokine_production
GO:0001818_negative_regulation_of_cytokine_production
GO:0001819_positive_regulation_of_cytokine_production
GO:0001843_neural_tube_closure
GO:0001881_receptor_recycling
GO:0001921_positive_regulation_of_receptor_recycling
GO:0001963_synaptic_transmission,_dopaminergic
GO:0002028_regulation_of_sodium_ion_transport
GO:0002031_G_protein-coupled_receptor_internalization
GO:0002052_positive_regulation_of_neuroblast_proliferation
GO:0002087_regulation_of_respiratory_gaseous_exchange_by_neurological_system_process
GO:0002091_negative_regulation_of_receptor_internalization
GO:0002092_positive_regulation_of_receptor_internalization
GO:0002218_activation_of_innate_immune_response
GO:0002223_stimulatory_C-type_lectin_receptor_signaling_pathway
GO:0002224_toll-like_receptor_signaling_pathway
GO:0002227_innate_immune_response_in_mucosa
GO:0002250_adaptive_immune_response
GO:0002286_T_cell_activation_involved_in_immune_response
GO:0002323_natural_killer_cell_activation_involved_in_immune_response
GO:0002376_immune_system_process
GO:0002377_immunoglobulin_production
GO:0002430_complement_receptor_mediated_signaling_pathway
GO:0002755_MyD88-dependent_toll-like_receptor_signaling_pathway
GO:0002756_MyD88-independent_toll-like_receptor_signaling_pathway
GO:0003333_amino_acid_transmembrane_transport
GO:0003407_neural_retina_development
GO:0005513_detection_of_calcium_ion
GO:0006120_mitochondrial_electron_transport,_NADH_to_ubiquinone
GO:0006122_mitochondrial_electron_transport,_ubiquinol_to_cytochrome_c
GO:0006123_mitochondrial_electron_transport,_cytochrome_c_to_oxygen
GO:0006283_transcription-coupled_nucleotide-excision_repair
GO:0006351_transcription,_DNA-templated
GO:0006352_DNA-templated_transcription,_initiation
GO:0006355_regulation_of_transcription,_DNA-templated
GO:0006357_regulation_of_transcription_by_RNA_polymerase_II
GO:0006361_transcription_initiation_from_RNA_polymerase_I_promoter
GO:0006362_transcription_elongation_from_RNA_polymerase_I_promoter
GO:0006363_termination_of_RNA_polymerase_I_transcription
GO:0006366_transcription_by_RNA_polymerase_II
GO:0006367_transcription_initiation_from_RNA_polymerase_II_promoter
GO:0006368_transcription_elongation_from_RNA_polymerase_II_promoter
GO:0006369_termination_of_RNA_polymerase_II_transcription
GO:0006383_transcription_by_RNA_polymerase_III
GO:0006390_mitochondrial_transcription
GO:0006465_signal_peptide_processing
GO:0006509_membrane_protein_ectodomain_proteolysis
GO:0006612_protein_targeting_to_membrane
GO:0006614_SRP-dependent_cotranslational_protein_targeting_to_membrane
GO:0006617_SRP-dependent_cotranslational_protein_targeting_to_membrane,_signal_sequence_recognition
GO:0006811_ion_transport
GO:0006812_cation_transport
GO:0006813_potassium_ion_transport
GO:0006814_sodium_ion_transport
GO:0006816_calcium_ion_transport
GO:0006820_anion_transport
GO:0006821_chloride_transport
GO:0006825_copper_ion_transport
GO:0006826_iron_ion_transport
GO:0006833_water_transport
GO:0006836_neurotransmitter_transport
GO:0006839_mitochondrial_transport
GO:0006851_mitochondrial_calcium_ion_transmembrane_transport
GO:0006865_amino_acid_transport
GO:0006869_lipid_transport
GO:0006874_cellular_calcium_ion_homeostasis
GO:0006886_intracellular_protein_transport
GO:0006888_ER_to_Golgi_vesicle-mediated_transport
GO:0006890_retrograde_vesicle-mediated_transport,_Golgi_to_ER
GO:0006891_intra-Golgi_vesicle-mediated_transport
GO:0006892_post-Golgi_vesicle-mediated_transport
GO:0006893_Golgi_to_plasma_membrane_transport
GO:0006895_Golgi_to_endosome_transport
GO:0006898_receptor-mediated_endocytosis
GO:0006900_vesicle_budding_from_membrane
GO:0006904_vesicle_docking_involved_in_exocytosis
GO:0006906_vesicle_fusion
GO:0006913_nucleocytoplasmic_transport
GO:0006955_immune_response
GO:0006959_humoral_immune_response
GO:0006977_DNA_damage_response,_signal_transduction_by_p53_class_mediator_resulting_in_cell_cycle_arrest
GO:0006978_DNA_damage_response,_signal_transduction_by_p53_class_mediator_resulting_in_transcription_of_p21_class_mediator
GO:0007009_plasma_membrane_organization
GO:0007010_cytoskeleton_organization
GO:0007015_actin_filament_organization
GO:0007017_microtubule-based_process
GO:0007018_microtubule-based_movement
GO:0007019_microtubule_depolymerization
GO:0007020_microtubule_nucleation
GO:0007026_negative_regulation_of_microtubule_depolymerization
GO:0007041_lysosomal_transport
GO:0007129_synapsis
GO:0007130_synaptonemal_complex_assembly
GO:0007156_homophilic_cell_adhesion_via_plasma_membrane_adhesion_molecules
GO:0007157_heterophilic_cell-cell_adhesion_via_plasma_membrane_cell_adhesion_molecules
GO:0007158_neuron_cell-cell_adhesion
GO:0007165_signal_transduction
GO:0007166_cell_surface_receptor_signaling_pathway
GO:0007169_transmembrane_receptor_protein_tyrosine_kinase_signaling_pathway
GO:0007171_activation_of_transmembrane_receptor_protein_tyrosine_kinase_activity
GO:0007173_epidermal_growth_factor_receptor_signaling_pathway
GO:0007175_negative_regulation_of_epidermal_growth_factor-activated_receptor_activity
GO:0007179_transforming_growth_factor_beta_receptor_signaling_pathway
GO:0007186_G_protein-coupled_receptor_signaling_pathway
GO:0007187_G_protein-coupled_receptor_signaling_pathway,_coupled_to_cyclic_nucleotide_second_messenger
GO:0007188_adenylate_cyclase-modulating_G_protein-coupled_receptor_signaling_pathway
GO:0007189_adenylate_cyclase-activating_G_protein-coupled_receptor_signaling_pathway
GO:0007193_adenylate_cyclase-inhibiting_G_protein-coupled_receptor_signaling_pathway
GO:0007200_phospholipase_C-activating_G_protein-coupled_receptor_signaling_pathway
GO:0007204_positive_regulation_of_cytosolic_calcium_ion_concentration
GO:0007205_protein_kinase_C-activating_G_protein-coupled_receptor_signaling_pathway
GO:0007212_dopamine_receptor_signaling_pathway
GO:0007213_G_protein-coupled_acetylcholine_receptor_signaling_pathway
GO:0007214_gamma-aminobutyric_acid_signaling_pathway
GO:0007215_glutamate_receptor_signaling_pathway
GO:0007216_G_protein-coupled_glutamate_receptor_signaling_pathway
GO:0007218_neuropeptide_signaling_pathway
GO:0007219_Notch_signaling_pathway
GO:0007221_positive_regulation_of_transcription_of_Notch_receptor_target
GO:0007223_Wnt_signaling_pathway,_calcium_modulating_pathway
GO:0007224_smoothened_signaling_pathway
GO:0007229_integrin-mediated_signaling_pathway
GO:0007249_I-kappaB_kinase/NF-kappaB_signaling
GO:0007254_JNK_cascade
GO:0007259_JAK-STAT_cascade
GO:0007263_nitric_oxide_mediated_signal_transduction
GO:0007264_small_GTPase_mediated_signal_transduction
GO:0007265_Ras_protein_signal_transduction
GO:0007266_Rho_protein_signal_transduction
GO:0007267_cell-cell_signaling
GO:0007268_chemical_synaptic_transmission
GO:0007269_neurotransmitter_secretion
GO:0007271_synaptic_transmission,_cholinergic
GO:0007274_neuromuscular_synaptic_transmission
GO:0007288_sperm_axoneme_assembly
GO:0007342_fusion_of_sperm_to_egg_plasma_membrane_involved_in_single_fertilization
GO:0007405_neuroblast_proliferation
GO:0007409_axonogenesis
GO:0007411_axon_guidance
GO:0007413_axonal_fasciculation
GO:0007416_synapse_assembly
GO:0007528_neuromuscular_junction_development
GO:0008045_motor_neuron_axon_guidance
GO:0008089_anterograde_axonal_transport
GO:0008154_actin_polymerization_or_depolymerization
GO:0008272_sulfate_transport
GO:0008277_regulation_of_G_protein-coupled_receptor_signaling_pathway
GO:0008286_insulin_receptor_signaling_pathway
GO:0008333_endosome_to_lysosome_transport
GO:0008543_fibroblast_growth_factor_receptor_signaling_pathway
GO:0008589_regulation_of_smoothened_signaling_pathway
GO:0008593_regulation_of_Notch_signaling_pathway
GO:0008625_extrinsic_apoptotic_signaling_pathway_via_death_domain_receptors
GO:0008630_intrinsic_apoptotic_signaling_pathway_in_response_to_DNA_damage
GO:0008631_intrinsic_apoptotic_signaling_pathway_in_response_to_oxidative_stress
GO:0008643_carbohydrate_transport
GO:0008645_hexose_transmembrane_transport
GO:0009303_rRNA_transcription
GO:0009755_hormone-mediated_signaling_pathway
GO:0009966_regulation_of_signal_transduction
GO:0009967_positive_regulation_of_signal_transduction
GO:0009968_negative_regulation_of_signal_transduction
GO:0010001_glial_cell_differentiation
GO:0010248_establishment_or_maintenance_of_transmembrane_electrochemical_gradient
GO:0010469_regulation_of_signaling_receptor_activity
GO:0010524_positive_regulation_of_calcium_ion_transport_into_cytosol
GO:0010608_posttranscriptional_regulation_of_gene_expression
GO:0010737_protein_kinase_A_signaling
GO:0010738_regulation_of_protein_kinase_A_signaling
GO:0010765_positive_regulation_of_sodium_ion_transport
GO:0010803_regulation_of_tumor_necrosis_factor-mediated_signaling_pathway
GO:0010804_negative_regulation_of_tumor_necrosis_factor-mediated_signaling_pathway
GO:0010880_regulation_of_release_of_sequestered_calcium_ion_into_cytosol_by_sarcoplasmic_reticulum
GO:0010881_regulation_of_cardiac_muscle_contraction_by_regulation_of_the_release_of_sequestered_calcium_ion
GO:0010917_negative_regulation_of_mitochondrial_membrane_potential
GO:0010975_regulation_of_neuron_projection_development
GO:0010976_positive_regulation_of_neuron_projection_development
GO:0010977_negative_regulation_of_neuron_projection_development
GO:0014002_astrocyte_development
GO:0014032_neural_crest_cell_development
GO:0014065_phosphatidylinositol_3-kinase_signaling
GO:0014066_regulation_of_phosphatidylinositol_3-kinase_signaling
GO:0014067_negative_regulation_of_phosphatidylinositol_3-kinase_signaling
GO:0014068_positive_regulation_of_phosphatidylinositol_3-kinase_signaling
GO:0015031_protein_transport
GO:0015671_oxygen_transport
GO:0015693_magnesium_ion_transport
GO:0015695_organic_cation_transport
GO:0015698_inorganic_anion_transport
GO:0015701_bicarbonate_transport
GO:0015711_organic_anion_transport
GO:0015718_monocarboxylic_acid_transport
GO:0015721_bile_acid_and_bile_salt_transport
GO:0015804_neutral_amino_acid_transport
GO:0015813_L-glutamate_transmembrane_transport
GO:0015867_ATP_transport
GO:0015909_long-chain_fatty_acid_transport
GO:0015914_phospholipid_transport
GO:0015918_sterol_transport
GO:0015986_ATP_synthesis_coupled_proton_transport
GO:0016050_vesicle_organization
GO:0016055_Wnt_signaling_pathway
GO:0016056_rhodopsin_mediated_signaling_pathway
GO:0016064_immunoglobulin_mediated_immune_response
GO:0016079_synaptic_vesicle_exocytosis
GO:0016081_synaptic_vesicle_docking
GO:0016082_synaptic_vesicle_priming
GO:0016192_vesicle-mediated_transport
GO:0016197_endosomal_transport
GO:0016254_preassembly_of_GPI_anchor_in_ER_membrane
GO:0016322_neuron_remodeling
GO:0016338_calcium-independent_cell-cell_adhesion_via_plasma_membrane_cell-adhesion_molecules
GO:0016339_calcium-dependent_cell-cell_adhesion_via_plasma_membrane_cell_adhesion_molecules
GO:0016358_dendrite_development
GO:0016446_somatic_hypermutation_of_immunoglobulin_genes
GO:0016601_Rac_protein_signal_transduction
GO:0017015_regulation_of_transforming_growth_factor_beta_receptor_signaling_pathway
GO:0017156_calcium_ion_regulated_exocytosis
GO:0017158_regulation_of_calcium_ion-dependent_exocytosis
GO:0019083_viral_transcription
GO:0019221_cytokine-mediated_signaling_pathway
GO:0019226_transmission_of_nerve_impulse
GO:0019228_neuronal_action_potential
GO:0019722_calcium-mediated_signaling
GO:0019933_cAMP-mediated_signaling
GO:0019934_cGMP-mediated_signaling
GO:0021522_spinal_cord_motor_neuron_differentiation
GO:0021527_spinal_cord_association_neuron_differentiation
GO:0021675_nerve_development
GO:0021895_cerebral_cortex_neuron_differentiation
GO:0021915_neural_tube_development
GO:0021954_central_nervous_system_neuron_development
GO:0022008_neurogenesis
GO:0022400_regulation_of_rhodopsin_mediated_signaling_pathway
GO:0022900_electron_transport_chain
GO:0022904_respiratory_electron_transport_chain
GO:0023014_signal_transduction_by_protein_phosphorylation
GO:0023019_signal_transduction_involved_in_regulation_of_gene_expression
GO:0030030_cell_projection_organization
GO:0030031_cell_projection_assembly
GO:0030036_actin_cytoskeleton_organization
GO:0030041_actin_filament_polymerization
GO:0030048_actin_filament-based_movement
GO:0030111_regulation_of_Wnt_signaling_pathway
GO:0030177_positive_regulation_of_Wnt_signaling_pathway
GO:0030178_negative_regulation_of_Wnt_signaling_pathway
GO:0030182_neuron_differentiation
GO:0030301_cholesterol_transport
GO:0030322_stabilization_of_membrane_potential
GO:0030330_DNA_damage_response,_signal_transduction_by_p53_class_mediator
GO:0030509_BMP_signaling_pathway
GO:0030511_positive_regulation_of_transforming_growth_factor_beta_receptor_signaling_pathway
GO:0030512_negative_regulation_of_transforming_growth_factor_beta_receptor_signaling_pathway
GO:0030513_positive_regulation_of_BMP_signaling_pathway
GO:0030514_negative_regulation_of_BMP_signaling_pathway
GO:0030516_regulation_of_axon_extension
GO:0030517_negative_regulation_of_axon_extension
GO:0030520_intracellular_estrogen_receptor_signaling_pathway
GO:0030521_androgen_receptor_signaling_pathway
GO:0030522_intracellular_receptor_signaling_pathway
GO:0030705_cytoskeleton-dependent_intracellular_transport
GO:0030833_regulation_of_actin_filament_polymerization
GO:0030837_negative_regulation_of_actin_filament_polymerization
GO:0030838_positive_regulation_of_actin_filament_polymerization
GO:0030866_cortical_actin_cytoskeleton_organization
GO:0030948_negative_regulation_of_vascular_endothelial_growth_factor_receptor_signaling_pathway
GO:0030949_positive_regulation_of_vascular_endothelial_growth_factor_receptor_signaling_pathway
GO:0030950_establishment_or_maintenance_of_actin_cytoskeleton_polarity
GO:0030970_retrograde_protein_transport,_ER_to_cytosol
GO:0031098_stress-activated_protein_kinase_signaling_cascade
GO:0031103_axon_regeneration
GO:0031110_regulation_of_microtubule_polymerization_or_depolymerization
GO:0031113_regulation_of_microtubule_polymerization
GO:0031115_negative_regulation_of_microtubule_polymerization
GO:0031116_positive_regulation_of_microtubule_polymerization
GO:0031122_cytoplasmic_microtubule_organization
GO:0031175_neuron_projection_development
GO:0031290_retinal_ganglion_cell_axon_guidance
GO:0031293_membrane_protein_intracellular_domain_proteolysis
GO:0031532_actin_cytoskeleton_reorganization
GO:0031623_receptor_internalization
GO:0031629_synaptic_vesicle_fusion_to_presynaptic_active_zone_membrane
GO:0031663_lipopolysaccharide-mediated_signaling_pathway
GO:0031665_negative_regulation_of_lipopolysaccharide-mediated_signaling_pathway
GO:0031929_TOR_signaling
GO:0032006_regulation_of_TOR_signaling
GO:0032007_negative_regulation_of_TOR_signaling
GO:0032008_positive_regulation_of_TOR_signaling
GO:0032012_regulation_of_ARF_protein_signal_transduction
GO:0032088_negative_regulation_of_NF-kappaB_transcription_factor_activity
GO:0032228_regulation_of_synaptic_transmission,_GABAergic
GO:0032230_positive_regulation_of_synaptic_transmission,_GABAergic
GO:0032233_positive_regulation_of_actin_filament_bundle_assembly
GO:0032367_intracellular_cholesterol_transport
GO:0032402_melanosome_transport
GO:0032465_regulation_of_cytokinesis
GO:0032467_positive_regulation_of_cytokinesis
GO:0032469_endoplasmic_reticulum_calcium_ion_homeostasis
GO:0032479_regulation_of_type_I_interferon_production
GO:0032480_negative_regulation_of_type_I_interferon_production
GO:0032481_positive_regulation_of_type_I_interferon_production
GO:0032482_Rab_protein_signal_transduction
GO:0032486_Rap_protein_signal_transduction
GO:0032509_endosome_transport_via_multivesicular_body_sorting_pathway
GO:0032688_negative_regulation_of_interferon-beta_production
GO:0032689_negative_regulation_of_interferon-gamma_production
GO:0032691_negative_regulation_of_interleukin-1_beta_production
GO:0032693_negative_regulation_of_interleukin-10_production
GO:0032695_negative_regulation_of_interleukin-12_production
GO:0032700_negative_regulation_of_interleukin-17_production
GO:0032703_negative_regulation_of_interleukin-2_production
GO:0032715_negative_regulation_of_interleukin-6_production
GO:0032722_positive_regulation_of_chemokine_production
GO:0032727_positive_regulation_of_interferon-alpha_production
GO:0032728_positive_regulation_of_interferon-beta_production
GO:0032729_positive_regulation_of_interferon-gamma_production
GO:0032731_positive_regulation_of_interleukin-1_beta_production
GO:0032733_positive_regulation_of_interleukin-10_production
GO:0032735_positive_regulation_of_interleukin-12_production
GO:0032740_positive_regulation_of_interleukin-17_production
GO:0032743_positive_regulation_of_interleukin-2_production
GO:0032753_positive_regulation_of_interleukin-4_production
GO:0032755_positive_regulation_of_interleukin-6_production
GO:0032757_positive_regulation_of_interleukin-8_production
GO:0032786_positive_regulation_of_DNA-templated_transcription,_elongation
GO:0032793_positive_regulation_of_CREB_transcription_factor_activity
GO:0032801_receptor_catabolic_process
GO:0032874_positive_regulation_of_stress-activated_MAPK_cascade
GO:0032897_negative_regulation_of_viral_transcription
GO:0032924_activin_receptor_signaling_pathway
GO:0032956_regulation_of_actin_cytoskeleton_organization
GO:0032968_positive_regulation_of_transcription_elongation_from_RNA_polymerase_II_promoter
GO:0033146_regulation_of_intracellular_estrogen_receptor_signaling_pathway
GO:0033147_negative_regulation_of_intracellular_estrogen_receptor_signaling_pathway
GO:0033148_positive_regulation_of_intracellular_estrogen_receptor_signaling_pathway
GO:0033173_calcineurin-NFAT_signaling_cascade
GO:0033209_tumor_necrosis_factor-mediated_signaling_pathway
GO:0033572_transferrin_transport
GO:0034097_response_to_cytokine
GO:0034122_negative_regulation_of_toll-like_receptor_signaling_pathway
GO:0034142_toll-like_receptor_4_signaling_pathway
GO:0034162_toll-like_receptor_9_signaling_pathway
GO:0034220_ion_transmembrane_transport
GO:0034244_negative_regulation_of_transcription_elongation_from_RNA_polymerase_II_promoter
GO:0034314_Arp2/3_complex-mediated_actin_nucleation
GO:0034341_response_to_interferon-gamma
GO:0034453_microtubule_anchoring
GO:0034765_regulation_of_ion_transmembrane_transport
GO:0035023_regulation_of_Rho_protein_signal_transduction
GO:0035024_negative_regulation_of_Rho_protein_signal_transduction
GO:0035025_positive_regulation_of_Rho_protein_signal_transduction
GO:0035082_axoneme_assembly
GO:0035235_ionotropic_glutamate_receptor_signaling_pathway
GO:0035249_synaptic_transmission,_glutamatergic
GO:0035329_hippo_signaling
GO:0035418_protein_localization_to_synapse
GO:0035435_phosphate_ion_transmembrane_transport
GO:0035457_cellular_response_to_interferon-alpha
GO:0035458_cellular_response_to_interferon-beta
GO:0035459_cargo_loading_into_vesicle
GO:0035556_intracellular_signal_transduction
GO:0035567_non-canonical_Wnt_signaling_pathway
GO:0035584_calcium-mediated_signaling_using_intracellular_calcium_source
GO:0035589_G_protein-coupled_purinergic_nucleotide_receptor_signaling_pathway
GO:0035666_TRIF-dependent_toll-like_receptor_signaling_pathway
GO:0035721_intraciliary_retrograde_transport
GO:0035722_interleukin-12-mediated_signaling_pathway
GO:0035723_interleukin-15-mediated_signaling_pathway
GO:0035725_sodium_ion_transmembrane_transport
GO:0035735_intraciliary_transport_involved_in_cilium_assembly
GO:0036376_sodium_ion_export_across_plasma_membrane
GO:0038061_NIK/NF-kappaB_signaling
GO:0038084_vascular_endothelial_growth_factor_signaling_pathway
GO:0038095_Fc-epsilon_receptor_signaling_pathway
GO:0038096_Fc-gamma_receptor_signaling_pathway_involved_in_phagocytosis
GO:0038110_interleukin-2-mediated_signaling_pathway
GO:0038111_interleukin-7-mediated_signaling_pathway
GO:0038128_ERBB2_signaling_pathway
GO:0038180_nerve_growth_factor_signaling_pathway
GO:0040037_negative_regulation_of_fibroblast_growth_factor_receptor_signaling_pathway
GO:0042059_negative_regulation_of_epidermal_growth_factor_receptor_signaling_pathway
GO:0042073_intraciliary_transport
GO:0042136_neurotransmitter_biosynthetic_process
GO:0042147_retrograde_transport,_endosome_to_Golgi
GO:0042391_regulation_of_membrane_potential
GO:0042462_eye_photoreceptor_cell_development
GO:0042551_neuron_maturation
GO:0042770_signal_transduction_in_response_to_DNA_damage
GO:0042771_intrinsic_apoptotic_signaling_pathway_in_response_to_DNA_damage_by_p53_class_mediator
GO:0042776_mitochondrial_ATP_synthesis_coupled_proton_transport
GO:0042789_mRNA_transcription_by_RNA_polymerase_II
GO:0042795_snRNA_transcription_by_RNA_polymerase_II
GO:0042953_lipoprotein_transport
GO:0042994_cytoplasmic_sequestering_of_transcription_factor
GO:0043001_Golgi_to_plasma_membrane_protein_transport
GO:0043113_receptor_clustering
GO:0043122_regulation_of_I-kappaB_kinase/NF-kappaB_signaling
GO:0043123_positive_regulation_of_I-kappaB_kinase/NF-kappaB_signaling
GO:0043124_negative_regulation_of_I-kappaB_kinase/NF-kappaB_signaling
GO:0043252_sodium-independent_organic_anion_transport
GO:0043401_steroid_hormone_mediated_signaling_pathway
GO:0043408_regulation_of_MAPK_cascade
GO:0043409_negative_regulation_of_MAPK_cascade
GO:0043410_positive_regulation_of_MAPK_cascade
GO:0043433_negative_regulation_of_DNA-binding_transcription_factor_activity
GO:0043491_protein_kinase_B_signaling
GO:0043517_positive_regulation_of_DNA_damage_response,_signal_transduction_by_p53_class_mediator
GO:0043518_negative_regulation_of_DNA_damage_response,_signal_transduction_by_p53_class_mediator
GO:0043523_regulation_of_neuron_apoptotic_process
GO:0043524_negative_regulation_of_neuron_apoptotic_process
GO:0043525_positive_regulation_of_neuron_apoptotic_process
GO:0043568_positive_regulation_of_insulin-like_growth_factor_receptor_signaling_pathway
GO:0043691_reverse_cholesterol_transport
GO:0043922_negative_regulation_by_host_of_viral_transcription
GO:0043923_positive_regulation_by_host_of_viral_transcription
GO:0043950_positive_regulation_of_cAMP-mediated_signaling
GO:0043951_negative_regulation_of_cAMP-mediated_signaling
GO:0045010_actin_nucleation
GO:0045022_early_endosome_to_late_endosome_transport
GO:0045078_positive_regulation_of_interferon-gamma_biosynthetic_process
GO:0045080_positive_regulation_of_chemokine_biosynthetic_process
GO:0045086_positive_regulation_of_interleukin-2_biosynthetic_process
GO:0045087_innate_immune_response
GO:0045088_regulation_of_innate_immune_response
GO:0045089_positive_regulation_of_innate_immune_response
GO:0045104_intermediate_filament_cytoskeleton_organization
GO:0045410_positive_regulation_of_interleukin-6_biosynthetic_process
GO:0045416_positive_regulation_of_interleukin-8_biosynthetic_process
GO:0045494_photoreceptor_cell_maintenance
GO:0045664_regulation_of_neuron_differentiation
GO:0045665_negative_regulation_of_neuron_differentiation
GO:0045666_positive_regulation_of_neuron_differentiation
GO:0045742_positive_regulation_of_epidermal_growth_factor_receptor_signaling_pathway
GO:0045744_negative_regulation_of_G_protein-coupled_receptor_signaling_pathway
GO:0045745_positive_regulation_of_G_protein-coupled_receptor_signaling_pathway
GO:0045746_negative_regulation_of_Notch_signaling_pathway
GO:0045747_positive_regulation_of_Notch_signaling_pathway
GO:0045773_positive_regulation_of_axon_extension
GO:0045824_negative_regulation_of_innate_immune_response
GO:0045879_negative_regulation_of_smoothened_signaling_pathway
GO:0045880_positive_regulation_of_smoothened_signaling_pathway
GO:0045892_negative_regulation_of_transcription,_DNA-templated
GO:0045893_positive_regulation_of_transcription,_DNA-templated
GO:0045899_positive_regulation_of_RNA_polymerase_II_transcriptional_preinitiation_complex_assembly
GO:0045943_positive_regulation_of_transcription_by_RNA_polymerase_I
GO:0045944_positive_regulation_of_transcription_by_RNA_polymerase_II
GO:0045956_positive_regulation_of_calcium_ion-dependent_exocytosis
GO:0046328_regulation_of_JNK_cascade
GO:0046329_negative_regulation_of_JNK_cascade
GO:0046330_positive_regulation_of_JNK_cascade
GO:0046426_negative_regulation_of_JAK-STAT_cascade
GO:0046427_positive_regulation_of_JAK-STAT_cascade
GO:0046579_positive_regulation_of_Ras_protein_signal_transduction
GO:0046580_negative_regulation_of_Ras_protein_signal_transduction
GO:0046626_regulation_of_insulin_receptor_signaling_pathway
GO:0046627_negative_regulation_of_insulin_receptor_signaling_pathway
GO:0046628_positive_regulation_of_insulin_receptor_signaling_pathway
GO:0046785_microtubule_polymerization
GO:0046902_regulation_of_mitochondrial_membrane_permeability
GO:0046907_intracellular_transport
GO:0046928_regulation_of_neurotransmitter_secretion
GO:0047496_vesicle_transport_along_microtubule
GO:0048008_platelet-derived_growth_factor_receptor_signaling_pathway
GO:0048009_insulin-like_growth_factor_receptor_signaling_pathway
GO:0048010_vascular_endothelial_growth_factor_receptor_signaling_pathway
GO:0048011_neurotrophin_TRK_receptor_signaling_pathway
GO:0048012_hepatocyte_growth_factor_receptor_signaling_pathway
GO:0048013_ephrin_receptor_signaling_pathway
GO:0048015_phosphatidylinositol-mediated_signaling
GO:0048016_inositol_phosphate-mediated_signaling
GO:0048096_chromatin-mediated_maintenance_of_transcription
GO:0048143_astrocyte_activation
GO:0048167_regulation_of_synaptic_plasticity
GO:0048168_regulation_of_neuronal_synaptic_plasticity
GO:0048169_regulation_of_long-term_neuronal_synaptic_plasticity
GO:0048172_regulation_of_short-term_neuronal_synaptic_plasticity
GO:0048208_COPII_vesicle_coating
GO:0048260_positive_regulation_of_receptor-mediated_endocytosis
GO:0048278_vesicle_docking
GO:0048384_retinoic_acid_receptor_signaling_pathway
GO:0048488_synaptic_vesicle_endocytosis
GO:0048489_synaptic_vesicle_transport
GO:0048490_anterograde_synaptic_vesicle_transport
GO:0048663_neuron_fate_commitment
GO:0048665_neuron_fate_specification
GO:0048666_neuron_development
GO:0048675_axon_extension
GO:0048678_response_to_axon_injury
GO:0048681_negative_regulation_of_axon_regeneration
GO:0048711_positive_regulation_of_astrocyte_differentiation
GO:0048791_calcium_ion-regulated_exocytosis_of_neurotransmitter
GO:0048812_neuron_projection_morphogenesis
GO:0048813_dendrite_morphogenesis
GO:0048814_regulation_of_dendrite_morphogenesis
GO:0048843_negative_regulation_of_axon_extension_involved_in_axon_guidance
GO:0050434_positive_regulation_of_viral_transcription
GO:0050710_negative_regulation_of_cytokine_secretion
GO:0050713_negative_regulation_of_interleukin-1_beta_secretion
GO:0050715_positive_regulation_of_cytokine_secretion
GO:0050718_positive_regulation_of_interleukin-1_beta_secretion
GO:0050767_regulation_of_neurogenesis
GO:0050768_negative_regulation_of_neurogenesis
GO:0050769_positive_regulation_of_neurogenesis
GO:0050770_regulation_of_axonogenesis
GO:0050771_negative_regulation_of_axonogenesis
GO:0050772_positive_regulation_of_axonogenesis
GO:0050773_regulation_of_dendrite_development
GO:0050775_positive_regulation_of_dendrite_morphogenesis
GO:0050776_regulation_of_immune_response
GO:0050777_negative_regulation_of_immune_response
GO:0050804_modulation_of_chemical_synaptic_transmission
GO:0050806_positive_regulation_of_synaptic_transmission
GO:0050807_regulation_of_synapse_organization
GO:0050808_synapse_organization
GO:0050848_regulation_of_calcium-mediated_signaling
GO:0050850_positive_regulation_of_calcium-mediated_signaling
GO:0050852_T_cell_receptor_signaling_pathway
GO:0050853_B_cell_receptor_signaling_pathway
GO:0050855_regulation_of_B_cell_receptor_signaling_pathway
GO:0050860_negative_regulation_of_T_cell_receptor_signaling_pathway
GO:0050862_positive_regulation_of_T_cell_receptor_signaling_pathway
GO:0050884_neuromuscular_process_controlling_posture
GO:0050885_neuromuscular_process_controlling_balance
GO:0050905_neuromuscular_process
GO:0051013_microtubule_severing
GO:0051016_barbed-end_actin_filament_capping
GO:0051017_actin_filament_bundle_assembly
GO:0051024_positive_regulation_of_immunoglobulin_secretion
GO:0051028_mRNA_transport
GO:0051044_positive_regulation_of_membrane_protein_ectodomain_proteolysis
GO:0051056_regulation_of_small_GTPase_mediated_signal_transduction
GO:0051090_regulation_of_DNA-binding_transcription_factor_activity
GO:0051091_positive_regulation_of_DNA-binding_transcription_factor_activity
GO:0051092_positive_regulation_of_NF-kappaB_transcription_factor_activity
GO:0051209_release_of_sequestered_calcium_ion_into_cytosol
GO:0051279_regulation_of_release_of_sequestered_calcium_ion_into_cytosol
GO:0051281_positive_regulation_of_release_of_sequestered_calcium_ion_into_cytosol
GO:0051402_neuron_apoptotic_process
GO:0051403_stress-activated_MAPK_cascade
GO:0051480_regulation_of_cytosolic_calcium_ion_concentration
GO:0051481_negative_regulation_of_cytosolic_calcium_ion_concentration
GO:0051482_positive_regulation_of_cytosolic_calcium_ion_concentration_involved_in_phospholipase_C-activating_G_protein-coupled_signaling_pathway
GO:0051493_regulation_of_cytoskeleton_organization
GO:0051560_mitochondrial_calcium_ion_homeostasis
GO:0051561_positive_regulation_of_mitochondrial_calcium_ion_concentration
GO:0051591_response_to_cAMP
GO:0051592_response_to_calcium_ion
GO:0051693_actin_filament_capping
GO:0051881_regulation_of_mitochondrial_membrane_potential
GO:0051896_regulation_of_protein_kinase_B_signaling
GO:0051897_positive_regulation_of_protein_kinase_B_signaling
GO:0051898_negative_regulation_of_protein_kinase_B_signaling
GO:0051899_membrane_depolarization
GO:0051924_regulation_of_calcium_ion_transport
GO:0051926_negative_regulation_of_calcium_ion_transport
GO:0051928_positive_regulation_of_calcium_ion_transport
GO:0051932_synaptic_transmission,_GABAergic
GO:0051965_positive_regulation_of_synapse_assembly
GO:0051966_regulation_of_synaptic_transmission,_glutamatergic
GO:0051968_positive_regulation_of_synaptic_transmission,_glutamatergic
GO:0055074_calcium_ion_homeostasis
GO:0055085_transmembrane_transport
GO:0060070_canonical_Wnt_signaling_pathway
GO:0060071_Wnt_signaling_pathway,_planar_cell_polarity_pathway
GO:0060074_synapse_maturation
GO:0060078_regulation_of_postsynaptic_membrane_potential
GO:0060079_excitatory_postsynaptic_potential
GO:0060088_auditory_receptor_cell_stereocilium_organization
GO:0060122_inner_ear_receptor_cell_stereocilium_organization
GO:0060252_positive_regulation_of_glial_cell_proliferation
GO:0060291_long-term_synaptic_potentiation
GO:0060292_long-term_synaptic_depression
GO:0060307_regulation_of_ventricular_cardiac_muscle_cell_membrane_repolarization
GO:0060314_regulation_of_ryanodine-sensitive_calcium-release_channel_activity
GO:0060315_negative_regulation_of_ryanodine-sensitive_calcium-release_channel_activity
GO:0060333_interferon-gamma-mediated_signaling_pathway
GO:0060334_regulation_of_interferon-gamma-mediated_signaling_pathway
GO:0060337_type_I_interferon_signaling_pathway
GO:0060339_negative_regulation_of_type_I_interferon-mediated_signaling_pathway
GO:0060340_positive_regulation_of_type_I_interferon-mediated_signaling_pathway
GO:0060391_positive_regulation_of_SMAD_protein_signal_transduction
GO:0060395_SMAD_protein_signal_transduction
GO:0060396_growth_hormone_receptor_signaling_pathway
GO:0060397_JAK-STAT_cascade_involved_in_growth_hormone_signaling_pathway
GO:0060402_calcium_ion_transport_into_cytosol
GO:0060765_regulation_of_androgen_receptor_signaling_pathway
GO:0060766_negative_regulation_of_androgen_receptor_signaling_pathway
GO:0060828_regulation_of_canonical_Wnt_signaling_pathway
GO:0061024_membrane_organization
GO:0061025_membrane_fusion
GO:0061314_Notch_signaling_involved_in_heart_development
GO:0061351_neural_precursor_cell_proliferation
GO:0061418_regulation_of_transcription_from_RNA_polymerase_II_promoter_in_response_to_hypoxia
GO:0061564_axon_development
GO:0061640_cytoskeleton-dependent_cytokinesis
GO:0061844_antimicrobial_humoral_immune_response_mediated_by_antimicrobial_peptide
GO:0070050_neuron_cellular_homeostasis
GO:0070059_intrinsic_apoptotic_signaling_pathway_in_response_to_endoplasmic_reticulum_stress
GO:0070098_chemokine-mediated_signaling_pathway
GO:0070102_interleukin-6-mediated_signaling_pathway
GO:0070104_negative_regulation_of_interleukin-6-mediated_signaling_pathway
GO:0070106_interleukin-27-mediated_signaling_pathway
GO:0070371_ERK1_and_ERK2_cascade
GO:0070372_regulation_of_ERK1_and_ERK2_cascade
GO:0070373_negative_regulation_of_ERK1_and_ERK2_cascade
GO:0070374_positive_regulation_of_ERK1_and_ERK2_cascade
GO:0070423_nucleotide-binding_oligomerization_domain_containing_signaling_pathway
GO:0070498_interleukin-1-mediated_signaling_pathway
GO:0070507_regulation_of_microtubule_cytoskeleton_organization
GO:0070509_calcium_ion_import
GO:0070528_protein_kinase_C_signaling
GO:0070555_response_to_interleukin-1
GO:0070588_calcium_ion_transmembrane_transport
GO:0070593_dendrite_self-avoidance
GO:0070757_interleukin-35-mediated_signaling_pathway
GO:0070885_negative_regulation_of_calcineurin-NFAT_signaling_cascade
GO:0070886_positive_regulation_of_calcineurin-NFAT_signaling_cascade
GO:0071277_cellular_response_to_calcium_ion
GO:0071320_cellular_response_to_cAMP
GO:0071345_cellular_response_to_cytokine_stimulus
GO:0071346_cellular_response_to_interferon-gamma
GO:0071347_cellular_response_to_interleukin-1
GO:0071353_cellular_response_to_interleukin-4
GO:0071354_cellular_response_to_interleukin-6
GO:0071526_semaphorin-plexin_signaling_pathway
GO:0071542_dopaminergic_neuron_differentiation
GO:0071577_zinc_ion_transmembrane_transport
GO:0071679_commissural_neuron_axon_guidance
GO:0071711_basement_membrane_organization
GO:0071805_potassium_ion_transmembrane_transport
GO:0071880_adenylate_cyclase-activating_adrenergic_receptor_signaling_pathway
GO:0072332_intrinsic_apoptotic_signaling_pathway_by_p53_class_mediator
GO:0072425_signal_transduction_involved_in_G2_DNA_damage_checkpoint
GO:0072657_protein_localization_to_membrane
GO:0072659_protein_localization_to_plasma_membrane
GO:0075733_intracellular_transport_of_virus
GO:0086002_cardiac_muscle_cell_action_potential_involved_in_contraction
GO:0086005_ventricular_cardiac_muscle_cell_action_potential
GO:0086010_membrane_depolarization_during_action_potential
GO:0086012_membrane_depolarization_during_cardiac_muscle_cell_action_potential
GO:0090090_negative_regulation_of_canonical_Wnt_signaling_pathway
GO:0090110_cargo_loading_into_COPII-coated_vesicle
GO:0090179_planar_cell_polarity_pathway_involved_in_neural_tube_closure
GO:0090197_positive_regulation_of_chemokine_secretion
GO:0090263_positive_regulation_of_canonical_Wnt_signaling_pathway
GO:0090280_positive_regulation_of_calcium_ion_import
GO:0090314_positive_regulation_of_protein_targeting_to_membrane
GO:0090316_positive_regulation_of_intracellular_protein_transport
GO:0097120_receptor_localization_to_synapse
GO:0097150_neuronal_stem_cell_population_maintenance
GO:0097190_apoptotic_signaling_pathway
GO:0097191_extrinsic_apoptotic_signaling_pathway
GO:0097192_extrinsic_apoptotic_signaling_pathway_in_absence_of_ligand
GO:0097193_intrinsic_apoptotic_signaling_pathway
GO:0097320_plasma_membrane_tubulation
GO:0097623_potassium_ion_export_across_plasma_membrane
GO:0097711_ciliary_basal_body-plasma_membrane_docking
GO:0098655_cation_transmembrane_transport
GO:0098656_anion_transmembrane_transport
GO:0098664_G_protein-coupled_serotonin_receptor_signaling_pathway
GO:0098719_sodium_ion_import_across_plasma_membrane
GO:0098742_cell-cell_adhesion_via_plasma-membrane_adhesion_molecules
GO:0098911_regulation_of_ventricular_cardiac_muscle_cell_action_potential
GO:0098915_membrane_repolarization_during_ventricular_cardiac_muscle_cell_action_potential
GO:0098962_regulation_of_postsynaptic_neurotransmitter_receptor_activity
GO:0098974_postsynaptic_actin_cytoskeleton_organization
GO:0099054_presynapse_assembly
GO:0099072_regulation_of_postsynaptic_membrane_neurotransmitter_receptor_levels
GO:0099149_regulation_of_postsynaptic_neurotransmitter_receptor_internalization
GO:0099151_regulation_of_postsynaptic_density_assembly
GO:0099175_regulation_of_postsynapse_organization
GO:0099509_regulation_of_presynaptic_cytosolic_calcium_ion_concentration
GO:0099560_synaptic_membrane_adhesion
GO:0099566_regulation_of_postsynaptic_cytosolic_calcium_ion_concentration
GO:0150078_positive_regulation_of_neuroinflammatory_response
GO:1900006_positive_regulation_of_dendrite_development
GO:1900016_negative_regulation_of_cytokine_production_involved_in_inflammatory_response
GO:1900017_positive_regulation_of_cytokine_production_involved_in_inflammatory_response
GO:1900165_negative_regulation_of_interleukin-6_secretion
GO:1900271_regulation_of_long-term_synaptic_potentiation
GO:1900272_negative_regulation_of_long-term_synaptic_potentiation
GO:1900273_positive_regulation_of_long-term_synaptic_potentiation
GO:1900740_positive_regulation_of_protein_insertion_into_mitochondrial_membrane_involved_in_apoptotic_signaling_pathway
GO:1900745_positive_regulation_of_p38MAPK_cascade
GO:1900747_negative_regulation_of_vascular_endothelial_growth_factor_signaling_pathway
GO:1901214_regulation_of_neuron_death
GO:1901215_negative_regulation_of_neuron_death
GO:1901216_positive_regulation_of_neuron_death
GO:1901222_regulation_of_NIK/NF-kappaB_signaling
GO:1901223_negative_regulation_of_NIK/NF-kappaB_signaling
GO:1901224_positive_regulation_of_NIK/NF-kappaB_signaling
GO:1901379_regulation_of_potassium_ion_transmembrane_transport
GO:1901381_positive_regulation_of_potassium_ion_transmembrane_transport
GO:1901796_regulation_of_signal_transduction_by_p53_class_mediator
GO:1901998_toxin_transport
GO:1902041_regulation_of_extrinsic_apoptotic_signaling_pathway_via_death_domain_receptors
GO:1902042_negative_regulation_of_extrinsic_apoptotic_signaling_pathway_via_death_domain_receptors
GO:1902043_positive_regulation_of_extrinsic_apoptotic_signaling_pathway_via_death_domain_receptors
GO:1902166_negative_regulation_of_intrinsic_apoptotic_signaling_pathway_in_response_to_DNA_damage_by_p53_class_mediator
GO:1902176_negative_regulation_of_oxidative_stress-induced_intrinsic_apoptotic_signaling_pathway
GO:1902230_negative_regulation_of_intrinsic_apoptotic_signaling_pathway_in_response_to_DNA_damage
GO:1902236_negative_regulation_of_endoplasmic_reticulum_stress-induced_intrinsic_apoptotic_signaling_pathway
GO:1902287_semaphorin-plexin_signaling_pathway_involved_in_axon_guidance
GO:1902358_sulfate_transmembrane_transport
GO:1902475_L-alpha-amino_acid_transmembrane_transport
GO:1902476_chloride_transmembrane_transport
GO:1902600_proton_transmembrane_transport
GO:1902894_negative_regulation_of_pri-miRNA_transcription_by_RNA_polymerase_II
GO:1902895_positive_regulation_of_pri-miRNA_transcription_by_RNA_polymerase_II
GO:1903076_regulation_of_protein_localization_to_plasma_membrane
GO:1903077_negative_regulation_of_protein_localization_to_plasma_membrane
GO:1903078_positive_regulation_of_protein_localization_to_plasma_membrane
GO:1903204_negative_regulation_of_oxidative_stress-induced_neuron_death
GO:1903507_negative_regulation_of_nucleic_acid-templated_transcription
GO:1903508_positive_regulation_of_nucleic_acid-templated_transcription
GO:1903830_magnesium_ion_transmembrane_transport
GO:1903861_positive_regulation_of_dendrite_extension
GO:1903980_positive_regulation_of_microglial_cell_activation
GO:1904262_negative_regulation_of_TORC1_signaling
GO:1904263_positive_regulation_of_TORC1_signaling
GO:1904659_glucose_transmembrane_transport
GO:1905606_regulation_of_presynapse_assembly
GO:1990090_cellular_response_to_nerve_growth_factor_stimulus
GO:1990126_retrograde_transport,_endosome_to_plasma_membrane
GO:1990138_neuron_projection_extension
GO:1990440_positive_regulation_of_transcription_from_RNA_polymerase_II_promoter_in_response_to_endoplasmic_reticulum_stress
GO:1990573_potassium_ion_import_across_plasma_membrane
GO:1990869_cellular_response_to_chemokine
GO:2000178_negative_regulation_of_neural_precursor_cell_proliferation
GO:2000179_positive_regulation_of_neural_precursor_cell_proliferation
GO:2000249_regulation_of_actin_cytoskeleton_reorganization
GO:2000251_positive_regulation_of_actin_cytoskeleton_reorganization
GO:2000272_negative_regulation_of_signaling_receptor_activity
GO:2000300_regulation_of_synaptic_vesicle_exocytosis
GO:2000310_regulation_of_NMDA_receptor_activity
GO:2000311_regulation_of_AMPA_receptor_activity
GO:2000463_positive_regulation_of_excitatory_postsynaptic_potential
GO:2000484_positive_regulation_of_interleukin-8_secretion
GO:2000649_regulation_of_sodium_ion_transmembrane_transporter_activity
GO:2000678_negative_regulation_of_transcription_regulatory_region_DNA_binding
GO:2000679_positive_regulation_of_transcription_regulatory_region_DNA_binding
GO:2000778_positive_regulation_of_interleukin-6_secretion
GO:2001222_regulation_of_neuron_migration
GO:2001223_negative_regulation_of_neuron_migration
GO:2001224_positive_regulation_of_neuron_migration
GO:2001234_negative_regulation_of_apoptotic_signaling_pathway
GO:2001235_positive_regulation_of_apoptotic_signaling_pathway
GO:2001237_negative_regulation_of_extrinsic_apoptotic_signaling_pathway
GO:2001238_positive_regulation_of_extrinsic_apoptotic_signaling_pathway
GO:2001240_negative_regulation_of_extrinsic_apoptotic_signaling_pathway_in_absence_of_ligand
GO:2001241_positive_regulation_of_extrinsic_apoptotic_signaling_pathway_in_absence_of_ligand
GO:2001243_negative_regulation_of_intrinsic_apoptotic_signaling_pathway
GO:2001244_positive_regulation_of_intrinsic_apoptotic_signaling_pathway
GO:2001256_regulation_of_store-operated_calcium_entry

## Sheet: KEGG_interest - KEGG_interest_l
KEGG_interest_list
geneset
hsa02010_ABC_transporters
hsa03013_RNA_transport
hsa03022_Basal_transcription_factors
hsa03320_PPAR_signaling_pathway
hsa04010_MAPK_signaling_pathway
hsa04012_ErbB_signaling_pathway
hsa04014_Ras_signaling_pathway
hsa04015_Rap1_signaling_pathway
hsa04020_Calcium_signaling_pathway
hsa04022_cGMP-PKG_signaling_pathway
hsa04024_cAMP_signaling_pathway
hsa04060_Cytokine-cytokine_receptor_interaction
hsa04061_Viral_protein_interaction_with_cytokine_and_cytokine_receptor
hsa04062_Chemokine_signaling_pathway
hsa04064_NF-kappa_B_signaling_pathway
hsa04066_HIF-1_signaling_pathway
hsa04068_FoxO_signaling_pathway
hsa04070_Phosphatidylinositol_signaling_system
hsa04071_Sphingolipid_signaling_pathway
hsa04072_Phospholipase_D_signaling_pathway
hsa04080_Neuroactive_ligand-receptor_interaction
hsa04115_p53_signaling_pathway
hsa04130_SNARE_interactions_in_vesicular_transport
hsa04150_mTOR_signaling_pathway
hsa04151_PI3K-Akt_signaling_pathway
hsa04152_AMPK_signaling_pathway
hsa04261_Adrenergic_signaling_in_cardiomyocytes
hsa04310_Wnt_signaling_pathway
hsa04330_Notch_signaling_pathway
hsa04340_Hedgehog_signaling_pathway
hsa04350_TGF-beta_signaling_pathway
hsa04370_VEGF_signaling_pathway
hsa04371_Apelin_signaling_pathway
hsa04390_Hippo_signaling_pathway
hsa04392_Hippo_signaling_pathway
hsa04512_ECM-receptor_interaction
hsa04610_Complement_and_coagulation_cascades
hsa04620_Toll-like_receptor_signaling_pathway
hsa04621_NOD-like_receptor_signaling_pathway
hsa04622_RIG-I-like_receptor_signaling_pathway
hsa04625_C-type_lectin_receptor_signaling_pathway
hsa04630_JAK-STAT_signaling_pathway
hsa04657_IL-17_signaling_pathway
hsa04660_T_cell_receptor_signaling_pathway
hsa04662_B_cell_receptor_signaling_pathway
hsa04664_Fc_epsilon_RI_signaling_pathway
hsa04668_TNF_signaling_pathway
hsa04672_Intestinal_immune_network_for_IgA_production
hsa04721_Synaptic_vesicle_cycle
hsa04722_Neurotrophin_signaling_pathway
hsa04723_Retrograde_endocannabinoid_signaling
hsa04724_Glutamatergic_synapse
hsa04725_Cholinergic_synapse
hsa04726_Serotonergic_synapse
hsa04727_GABAergic_synapse
hsa04728_Dopaminergic_synapse
hsa04810_Regulation_of_actin_cytoskeleton
hsa04910_Insulin_signaling_pathway
hsa04912_GnRH_signaling_pathway
hsa04915_Estrogen_signaling_pathway
hsa04917_Prolactin_signaling_pathway
hsa04919_Thyroid_hormone_signaling_pathway
hsa04920_Adipocytokine_signaling_pathway
hsa04921_Oxytocin_signaling_pathway
hsa04922_Glucagon_signaling_pathway
hsa04926_Relaxin_signaling_pathway
hsa04933_AGE-RAGE_signaling_pathway_in_diabetic_complications
hsa04961_Endocrine_and_other_factor-regulated_calcium_reabsorption
hsa05120_Epithelial_cell_signaling_in_Helicobacter_pylori_infection
hsa05170_Human_immunodeficiency_virus_1_infection
hsa05320_Autoimmune_thyroid_disease
hsa05340_Primary_immunodeficiency
