# Supplementary material for: Early Transcriptional Changes in Rabies Virus-Infected Neurons and Their Impact on Neuronal Functions
Source: Front Microbiol. 2021 Dec 13;12:730892. doi: 10.3389/fmicb.2021.730892 (PMC8713068; doi:10.3389/fmicb.2021.730892)
Supplement: Supplementary file 3 [file Table_2.XLSX]

## Sheet: GO_Cell Cycle
Go_cycle_list
geneset
GO:0000077_DNA_damage_checkpoint
GO:0000082_G1/S_transition_of_mitotic_cell_cycle
GO:0000086_G2/M_transition_of_mitotic_cell_cycle
GO:0000132_establishment_of_mitotic_spindle_orientation
GO:0000281_mitotic_cytokinesis
GO:0001778_plasma_membrane_repair
GO:0006281_DNA_repair
GO:0006915_apoptotic_process
GO:0006974_cellular_response_to_DNA_damage_stimulus
GO:0007049_cell_cycle
GO:0007050_cell_cycle_arrest
GO:0007052_mitotic_spindle_organization
GO:0007093_mitotic_cell_cycle_checkpoint
GO:0007096_regulation_of_exit_from_mitosis
GO:0008625_extrinsic_apoptotic_signaling_pathway_via_death_domain_receptors
GO:0008630_intrinsic_apoptotic_signaling_pathway_in_response_to_DNA_damage
GO:0008631_intrinsic_apoptotic_signaling_pathway_in_response_to_oxidative_stress
GO:0008637_apoptotic_mitochondrial_changes
GO:0010458_exit_from_mitosis
GO:0042769_DNA_damage_response,_detection_of_DNA_damage
GO:0042770_signal_transduction_in_response_to_DNA_damage
GO:0051402_neuron_apoptotic_process
GO:0090307_mitotic_spindle_assembly
GO:0097191_extrinsic_apoptotic_signaling_pathway
GO:0097193_intrinsic_apoptotic_signaling_pathway

## Sheet: GO_Gene Expression
Go_expression_list
geneset
GO:0006366_transcription_by_RNA_polymerase_II
GO:0006367_transcription_initiation_from_RNA_polymerase_II_promoter
GO:0006378_mRNA_polyadenylation
GO:0006397_mRNA_processing
GO:0006402_mRNA_catabolic_process
GO:0006412_translation
GO:0006413_translational_initiation
GO:0006457_protein_folding
GO:0006986_response_to_unfolded_protein
GO:0008380_RNA_splicing
GO:0016032_viral_process
GO:0019079_viral_genome_replication
GO:0034620_cellular_response_to_unfolded_protein
GO:0035278_miRNA_mediated_inhibition_of_translation
GO:0042026_protein_refolding
GO:0042994_cytoplasmic_sequestering_of_transcription_factor
GO:0043687_post-translational_protein_modification
GO:0046718_viral_entry_into_host_cell
GO:0048255_mRNA_stabilization
GO:0051028_mRNA_transport
GO:0051085_chaperone_cofactor-dependent_protein_refolding
GO:0051131_chaperone-mediated_protein_complex_assembly
GO:0061077_chaperone-mediated_protein_folding
GO:0061158_3'-UTR-mediated_mRNA_destabilization
GO:0070935_3'-UTR-mediated_mRNA_stabilization
GO:0090502_RNA_phosphodiester_bond_hydrolysis,_endonucleolytic
GO:0006906_vesicle_fusion
GO:0016081_synaptic_vesicle_docking
GO:0031629_synaptic_vesicle_fusion_to_presynaptic_active_zone_membrane
GO:0048208_COPII_vesicle_coating

## Sheet: GO_Immune Response
Go_immune_list
geneset
GO:0000187_activation_of_MAPK_activity
GO:0000188_inactivation_of_MAPK_activity
GO:0001774_microglial_cell_activation
GO:0001816_cytokine_production
GO:0002250_adaptive_immune_response
GO:0002286_T_cell_activation_involved_in_immune_response
GO:0002755_MyD88-dependent_toll-like_receptor_signaling_pathway
GO:0002756_MyD88-independent_toll-like_receptor_signaling_pathway
GO:0006955_immune_response
GO:0006959_humoral_immune_response
GO:0007250_activation_of_NF-kappaB-inducing_kinase_activity
GO:0010803_regulation_of_tumor_necrosis_factor-mediated_signaling_pathway
GO:0019221_cytokine-mediated_signaling_pathway
GO:0032479_regulation_of_type_I_interferon_production
GO:0034097_response_to_cytokine
GO:0034142_toll-like_receptor_4_signaling_pathway
GO:0034162_toll-like_receptor_9_signaling_pathway
GO:0034612_response_to_tumor_necrosis_factor
GO:0035666_TRIF-dependent_toll-like_receptor_signaling_pathway
GO:0043122_regulation_of_I-kappaB_kinase/NF-kappaB_signaling
GO:0043408_regulation_of_MAPK_cascade
GO:0045087_innate_immune_response
GO:0045088_regulation_of_innate_immune_response
GO:0050776_regulation_of_immune_response
GO:0051403_stress-activated_MAPK_cascade
GO:0060334_regulation_of_interferon-gamma-mediated_signaling_pathway
GO:0070098_chemokine-mediated_signaling_pathway
GO:0071345_cellular_response_to_cytokine_stimulus
GO:0071346_cellular_response_to_interferon-gamma
GO:0071356_cellular_response_to_tumor_necrosis_factor
GO:1901222_regulation_of_NIK/NF-kappaB_signaling

## Sheet: GO_Neuronal Function
Go_neuronal_list
geneset
GO:0000226_microtubule_cytoskeleton_organization
GO:0001764_neuron_migration
GO:0001774_microglial_cell_activation
GO:0003333_amino_acid_transmembrane_transport
GO:0006811_ion_transport
GO:0006813_potassium_ion_transport
GO:0006814_sodium_ion_transport
GO:0006851_mitochondrial_calcium_ion_transmembrane_transport
GO:0006874_cellular_calcium_ion_homeostasis
GO:0007015_actin_filament_organization
GO:0007019_microtubule_depolymerization
GO:0007129_synapsis
GO:0007268_chemical_synaptic_transmission
GO:0007269_neurotransmitter_secretion
GO:0007409_axonogenesis
GO:0007411_axon_guidance
GO:0016081_synaptic_vesicle_docking
GO:0022008_neurogenesis
GO:0030036_actin_cytoskeleton_organization
GO:0030041_actin_filament_polymerization
GO:0030182_neuron_differentiation
GO:0031122_cytoplasmic_microtubule_organization
GO:0031175_neuron_projection_development
GO:0031629_synaptic_vesicle_fusion_to_presynaptic_active_zone_membrane
GO:0034220_ion_transmembrane_transport
GO:0035249_synaptic_transmission,_glutamatergic
GO:0035721_intraciliary_retrograde_transport
GO:0046785_microtubule_polymerization
GO:0048143_astrocyte_activation
GO:0048663_neuron_fate_commitment
GO:0048665_neuron_fate_specification
GO:0048666_neuron_development
GO:0048675_axon_extension
GO:0048678_response_to_axon_injury
GO:0050804_modulation_of_chemical_synaptic_transmission
GO:0051560_mitochondrial_calcium_ion_homeostasis
GO:0060074_synapse_maturation
GO:0060291_long-term_synaptic_potentiation
GO:0060292_long-term_synaptic_depression
GO:0061351_neural_precursor_cell_proliferation
GO:0070593_dendrite_self-avoidance
GO:0071277_cellular_response_to_calcium_ion
GO:0071805_potassium_ion_transmembrane_transport
GO:0098656_anion_transmembrane_transport
GO:0098719_sodium_ion_import_across_plasma_membrane
GO:0099054_presynapse_assembly
GO:0099560_synaptic_membrane_adhesion
GO:1902476_chloride_transmembrane_transport
GO:1902600_proton_transmembrane_transport
GO:1990138_neuron_projection_extension
GO:0007160_cell-matrix_adhesion
GO:0033627_cell_adhesion_mediated_by_integrin
GO:0044331_cell-cell_adhesion_mediated_by_cadherin
GO:0098609_cell-cell_adhesion
GO:0022617_extracellular_matrix_disassembly
GO:0030198_extracellular_matrix_organization
