# Supplementary material for: Early Transcriptional Changes in Rabies Virus-Infected Neurons and Their Impact on Neuronal Functions
Source: Front Microbiol. 2021 Dec 13;12:730892. doi: 10.3389/fmicb.2021.730892 (PMC8713068; doi:10.3389/fmicb.2021.730892)
Supplement: Supplementary file 4 [file Table_3.XLSX]

## Sheet: Sheet 1 - Qiagen QuantiTect Pri
Qiagen QuantiTect Primer
Gene Name	Qiagen Identifier
DUSP5	QT00001337
FOS	QT00007070
FOSB	QT00013076
JUNB	QT00201341
GDF15	QT00082558
WNT3A	QT00220542
SLC3A2	QT00085897
GABRQ	QT00038472
DYNLL1	QT00002282
NR4A1	QT00095515
NFKB1	QT00063791
NFKB2	QT00012404
RELB	QT00038640
NFKBIA	QT00014266
TNFAIP3	QT00041853
ICAM1	QT00074900
VCAM1	QT00018347
CCL2	QT00212730
CXCL10	QT01003065
STAT3	QT00068754
SLC7A11	QT00002674
HSP90AA1	QT01002603
