# Supplementary material for: Early Transcriptional Changes in Rabies Virus-Infected Neurons and Their Impact on Neuronal Functions
Source: Front Microbiol. 2021 Dec 13;12:730892. doi: 10.3389/fmicb.2021.730892 (PMC8713068; doi:10.3389/fmicb.2021.730892)
Supplement: Supplementary file 5 [file Table_4.XLSX]

## Sheet: BP_8hrs - ORA_Tt8_vs_NIt8-BP_al
ORA_Tt8_vs_NIt8-BP_all
geneset	NGenes	pctDE	OR	pvalue	FDR	external_gene_name.DE
GO:0000727_double-strand_break_repair_via_break-induced_replication	12	25	91.23	1.08256e-05	0.010193	MCM4;MCM6;GINS4
GO:0006260_DNA_replication	130	4.62	13.68	9.52726e-06	0.010193	MCM4;MCM6;CLSPN;POLA1;MCM10;BRCA1
GO:0006270_DNA_replication_initiation	30	13.33	42.7	4.64343e-06	0.010193	MCM6;POLA1;PRIM1;MCM10
GO:0006271_DNA_strand_elongation_involved_in_DNA_replication	13	23.08	82.36	1.40352e-05	0.010193	MCM4;GINS4;POLA1
GO:0000082_G1/S_transition_of_mitotic_cell_cycle	100	5	14.73	3.72032e-05	0.0204184	MCM4;MCM6;POLA1;PRIM1;MCM10
GO:0001649_osteoblast_differentiation	106	4.72	13.86	4.92009e-05	0.0204184	SPP1;MEF2C;TPM4;SFRP1;LEF1
GO:0030279_negative_regulation_of_ossification	19	15.79	51.46	4.67847e-05	0.0204184	MEF2C;SMAD7;SFRP1
GO:0071560_cellular_response_to_transforming_growth_factor_beta_stimulus	57	7.02	20.93	6.1955e-05	0.0224974	CLDN1;MEF2C;SMAD7;SFRP1
GO:0090303_positive_regulation_of_wound_healing	24	12.5	39.23	9.64058e-05	0.0311177	HBEGF;ANXA1;CLDN1
GO:0006915_apoptotic_process	542	1.66	4.85	0.000197408	0.057347	TNFRSF11B;TNFRSF19;MELK;TGFBR2;MEF2C;IFT57;HIF3A;EVA1A;BRCA1
GO:0098609_cell-cell_adhesion	147	3.4	9.84	0.000229833	0.0606969	ANXA1;PDPN;CNN3;CDH2;DSC2
GO:0030335_positive_regulation_of_cell_migration	243	2.47	7.13	0.000306106	0.0741032	HBEGF;CLDN1;PDPN;CEMIP;LEF1;CD274
GO:0007517_muscle_organ_development	90	4.44	12.88	0.000364765	0.075025	HBEGF;CRYAB;MEF2C;CHODL
GO:0010719_negative_regulation_of_epithelial_to_mesenchymal_transition	37	8.11	24.25	0.000357295	0.075025	LDLRAD4;SMAD7;SFRP1
GO:0030198_extracellular_matrix_organization	254	2.36	6.81	0.000387392	0.075025	TNFRSF11B;SPP1;COL11A1;LAMA4;PTX3;CRISPLD2
GO:0007165_signal_transduction	1027	1.17	3.45	0.000444947	0.0807857	HBEGF;TNFRSF11B;TGFA;SECTM1;SPP1;ANXA1;TXNRD1;PDE1C;LRRC2;CALCB;RSU1;CD274
GO:0003376_sphingosine-1-phosphate_receptor_signaling_pathway	10	20	67.95	0.00060844	0.0976314	S1PR3;EZR
GO:0010718_positive_regulation_of_epithelial_to_mesenchymal_transition	45	6.67	19.62	0.000638553	0.0976314	TGFBR2;PDPN;LEF1
GO:0034629_cellular_protein-containing_complex_localization	10	20	67.95	0.00060844	0.0976314	EZR;SMAD7
GO:0006048_UDP-N-acetylglucosamine_biosynthetic_process	11	18.18	60.42	0.00074184	0.107752	UAP1;UAP1L1
GO:0045892_negative_regulation_of_transcription,_DNA-templated	528	1.52	4.38	0.0008215	0.112164	CRYAB;ARNTL;SAMD11;HR;SFRP1;NPAS1;LEF1;BRCA1
GO:0060394_negative_regulation_of_pathway-restricted_SMAD_protein_phosphorylation	12	16.67	54.34	0.000888043	0.112164	LDLRAD4;SMAD7
GO:0090179_planar_cell_polarity_pathway_involved_in_neural_tube_closure	12	16.67	54.34	0.000888043	0.112164	GRHL3;SFRP1
GO:0045741_positive_regulation_of_epidermal_growth_factor-activated_receptor_activity	13	15.38	49.41	0.00104695	0.121656	HBEGF;TGFA
GO:0060389_pathway-restricted_SMAD_protein_phosphorylation	13	15.38	49.41	0.00104695	0.121656	TGFBR2;SMAD7
GO:0062009_secondary_palate_development	14	14.29	45.26	0.00121848	0.131099	TGFBR2;LEF1
GO:1903364_positive_regulation_of_cellular_protein_catabolic_process	14	14.29	45.26	0.00121848	0.131099	EZR;PTTG1IP
GO:0048545_response_to_steroid_hormone	15	13.33	41.84	0.00140252	0.145511	SPP1;TGFBR2
GO:0006268_DNA_unwinding_involved_in_DNA_replication	16	12.5	38.84	0.00159898	0.154835	MCM4;MCM6
GO:0043627_response_to_estrogen	61	4.92	14.2	0.00155113	0.154835	TNFRSF11B;TGFBR2;BRCA1
GO:0001947_heart_looping	63	4.76	13.73	0.00170231	0.157319	TGFBR2;MEF2C;IFT57
GO:0007420_brain_development	230	2.17	6.19	0.00173295	0.157319	RGS4;SYNJ2;TGFBR2;CDH2;HAP1
GO:0002063_chondrocyte_development	17	11.76	36.26	0.00180778	0.159139	COL11A1;EIF2AK3
GO:0002244_hematopoietic_progenitor_cell_differentiation	66	4.55	13.07	0.00194583	0.166254	KRT75;FST;SFRP1
GO:0008585_female_gonad_development	19	10.53	32	0.002262	0.187746	FST;SFRP1
GO:0008360_regulation_of_cell_shape	151	2.65	7.52	0.0024985	0.201615	ANXA1;EZR;PDPN;DNMBP
GO:0031398_positive_regulation_of_protein_ubiquitination	73	4.11	11.76	0.00259538	0.203772	SMAD7;PTTG1IP;BRCA1
GO:0045861_negative_regulation_of_proteolysis	22	9.09	27.21	0.00303349	0.225956	PLAT;DNAJC1
GO:2000378_negative_regulation_of_reactive_oxygen_species_metabolic_process	22	9.09	27.21	0.00303349	0.225956	CRYAB;BRCA1
GO:0033344_cholesterol_efflux	23	8.7	25.92	0.00331434	0.240704	ABCG1;ABCG4
GO:0030307_positive_regulation_of_cell_growth	81	3.7	10.55	0.00348459	0.241734	HBEGF;SFRP1;LEF1
GO:0030509_BMP_signaling_pathway	84	3.57	10.16	0.00386031	0.241734	FST;SMAD7;LEF1
GO:0030512_negative_regulation_of_transforming_growth_factor_beta_receptor_signaling_pathway	83	3.61	10.29	0.00373245	0.241734	LDLRAD4;TGFBR2;SMAD7
GO:0031018_endocrine_pancreas_development	24	8.33	24.74	0.00360688	0.241734	ANXA1;EIF2AK3
GO:0032201_telomere_maintenance_via_semi-conservative_replication	24	8.33	24.74	0.00360688	0.241734	POLA1;PRIM1
GO:0055010_ventricular_cardiac_muscle_tissue_morphogenesis	25	8	23.66	0.00391102	0.241734	COL11A1;SMAD7
GO:0061436_establishment_of_skin_barrier	25	8	23.66	0.00391102	0.241734	GRHL3;CLDN1
GO:0051149_positive_regulation_of_muscle_cell_differentiation	26	7.69	22.68	0.00422668	0.255802	MEF2C;CDH2
GO:0010575_positive_regulation_of_vascular_endothelial_growth_factor_production	28	7.14	20.92	0.00489217	0.290036	EIF2AK3;BRCA1
GO:0007159_leukocyte_cell-cell_adhesion	29	6.9	20.14	0.00524183	0.295355	EZR;NT5E
GO:0034599_cellular_response_to_oxidative_stress	94	3.19	9.04	0.0052869	0.295355	TXNRD1;PRDX6;PRR5L
GO:0044344_cellular_response_to_fibroblast_growth_factor_stimulus	29	6.9	20.14	0.00524183	0.295355	DSTYK;SFRP1
GO:0007389_pattern_specification_process	30	6.67	19.43	0.00560266	0.307089	GRHL3;FST
GO:0051966_regulation_of_synaptic_transmission,_glutamatergic	31	6.45	18.76	0.00597456	0.315565	MEF2C;CDH2
GO:0060325_face_morphogenesis	31	6.45	18.76	0.00597456	0.315565	LEF1;CRISPLD2
GO:0001569_branching_involved_in_blood_vessel_morphogenesis	32	6.25	18.13	0.00635745	0.329793	TGFBR2;LEF1
GO:0030073_insulin_secretion	33	6.06	17.55	0.00675125	0.344077	ANXA1;ILDR2
GO:0042100_B_cell_proliferation	35	5.71	16.49	0.00757121	0.379213	MEF2C;LEF1
GO:0042059_negative_regulation_of_epidermal_growth_factor_receptor_signaling_pathway	36	5.56	16	0.00799721	0.393761	HBEGF;TGFA
GO:0001657_ureteric_bud_development	37	5.41	15.54	0.00843378	0.401641	SMAD7;SFRP1
GO:0060412_ventricular_septum_morphogenesis	37	5.41	15.54	0.00843378	0.401641	TGFBR2;SMAD7
GO:0043312_neutrophil_degranulation	482	1.24	3.52	0.00945554	0.443038	GLIPR1;PGM2;RAB31;PRDX6;PTX3;CRISPLD2
GO:0032781_positive_regulation_of_ATPase_activity	40	5	14.31	0.00980605	0.452168	ATP1B2;DNAJC1
GO:0002088_lens_development_in_camera-type_eye	41	4.88	13.95	0.0102841	0.457359	CRYAB;TGFBR2
GO:0043066_negative_regulation_of_apoptotic_process	492	1.22	3.44	0.0103909	0.457359	CRYAB;ANXA1;DSTYK;PDPN;SFRP1;LEF1
GO:1901998_toxin_transport	41	4.88	13.95	0.0102841	0.457359	ABCG1;CD274
GO:0007566_embryo_implantation	42	4.76	13.6	0.0107722	0.460196	SPP1;TGFBR2
GO:0031623_receptor_internalization	42	4.76	13.6	0.0107722	0.460196	EZR;RAB31
GO:0018108_peptidyl-tyrosine_phosphorylation	123	2.44	6.85	0.0110454	0.465028	MELK;DSTYK;WEE1
GO:0001568_blood_vessel_development	43	4.65	13.26	0.0112705	0.467724	TGFBR2;MEF2C
GO:0008284_positive_regulation_of_cell_population_proliferation	512	1.17	3.3	0.0124565	0.502583	S1PR3;HBEGF;TGFA;TGFBR2;SFRP1;LEF1
GO:0050714_positive_regulation_of_protein_secretion	45	4.44	12.64	0.0122968	0.502583	ABCG1;EZR
GO:0071356_cellular_response_to_tumor_necrosis_factor	132	2.27	6.37	0.0133507	0.52457	CLDN1;SFRP1;BRCA1
GO:0120163_negative_regulation_of_cold-induced_thermogenesis	47	4.26	12.08	0.0133626	0.52457	ARNTL;LAMA4
GO:0001501_skeletal_system_development	136	2.21	6.18	0.0144567	0.532574	TNFRSF11B;FST;EIF2AK3
GO:0003151_outflow_tract_morphogenesis	49	4.08	11.57	0.014467	0.532574	TGFBR2;MEF2C
GO:0006954_inflammatory_response	383	1.31	3.66	0.0144831	0.532574	S1PR3;SPP1;ANXA1;IL1RAP;PTX3
GO:0007173_epidermal_growth_factor_receptor_signaling_pathway	49	4.08	11.57	0.014467	0.532574	HBEGF;TGFA
GO:0061024_membrane_organization	134	2.24	6.27	0.0138974	0.532574	HBEGF;TGFA;SYNJ2
GO:0030514_negative_regulation_of_BMP_signaling_pathway	50	4	11.33	0.0150335	0.545904	SMAD7;SFRP1
GO:0008283_cell_population_proliferation	140	2.14	5.99	0.0156132	0.559956	MELK;TXNRD1;MCM10
GO:0016579_protein_deubiquitination	262	1.53	4.27	0.016856	0.597155	RNF128;SMAD7;CLSPN;BRCA1
GO:0030336_negative_regulation_of_cell_migration	149	2.01	5.62	0.0184014	0.636382	LDLRAD4;SMAD7;SFRP1
GO:0045893_positive_regulation_of_transcription,_DNA-templated	558	1.08	3.02	0.0182745	0.636382	SPP1;ARNTL;MEF2C;SFRP1;LEF1;BRCA1
GO:0000076_DNA_replication_checkpoint	10	10	29.93	0.0367032	0.641548	CLSPN
GO:0000729_DNA_double-strand_break_processing	15	6.67	19.24	0.0545514	0.641548	BRCA1
GO:0000731_DNA_synthesis_involved_in_DNA_repair	12	8.33	24.5	0.0438822	0.641548	POLA1
GO:0001503_ossification	77	2.6	7.24	0.0336564	0.641548	COL11A1;EIF2AK3
GO:0001666_response_to_hypoxia	163	1.84	5.13	0.0232537	0.641548	CRYAB;PLAT;TGFBR2
GO:0001736_establishment_of_planar_polarity	14	7.14	20.72	0.0510082	0.641548	GRHL3
GO:0001833_inner_cell_mass_cell_proliferation	13	7.69	22.45	0.0474518	0.641548	GINS4
GO:0001843_neural_tube_closure	78	2.56	7.15	0.0344597	0.641548	GRHL3;IFT57
GO:0001946_lymphangiogenesis	11	9.09	26.95	0.0402993	0.641548	PDPN
GO:0001964_startle_response	13	7.69	22.45	0.0474518	0.641548	NPAS1
GO:0003139_secondary_heart_field_specification	11	9.09	26.95	0.0402993	0.641548	MEF2C
GO:0003181_atrioventricular_valve_morphogenesis	12	8.33	24.5	0.0438822	0.641548	TGFBR2
GO:0003382_epithelial_cell_morphogenesis	16	6.25	17.96	0.0580816	0.641548	PALLD
GO:0005980_glycogen_catabolic_process	16	6.25	17.96	0.0580816	0.641548	PGM2
GO:0006069_ethanol_oxidation	12	8.33	24.5	0.0438822	0.641548	ACSS1
GO:0006098_pentose-phosphate_shunt	12	8.33	24.5	0.0438822	0.641548	PGM2
GO:0006163_purine_nucleotide_metabolic_process	12	8.33	24.5	0.0438822	0.641548	GMPR
GO:0006195_purine_nucleotide_catabolic_process	13	7.69	22.45	0.0474518	0.641548	NT5E
GO:0006301_postreplication_repair	10	10	29.93	0.0367032	0.641548	BRCA1
GO:0006303_double-strand_break_repair_via_nonhomologous_end_joining	66	3.03	8.49	0.0253311	0.641548	POLA1;BRCA1
GO:0006349_regulation_of_gene_expression_by_genetic_imprinting	16	6.25	17.96	0.0580816	0.641548	BRCA1
GO:0006606_protein_import_into_nucleus	78	2.56	7.15	0.0344597	0.641548	ARNTL;PTTG1IP
GO:0006887_exocytosis	94	2.13	5.9	0.0482812	0.641548	SYTL2;HAP1
GO:0006919_activation_of_cysteine-type_endopeptidase_activity_involved_in_apoptotic_process	84	2.38	6.62	0.0394334	0.641548	IFT57;EIF2AK3
GO:0006978_DNA_damage_response,_signal_transduction_by_p53_class_mediator_resulting_in_transcription_of_p21_class_mediator	14	7.14	20.72	0.0510082	0.641548	BRCA1
GO:0006979_response_to_oxidative_stress	103	1.94	5.37	0.056797	0.641548	NEIL1;PRDX6
GO:0006983_ER_overload_response	11	9.09	26.95	0.0402993	0.641548	EIF2AK3
GO:0007059_chromosome_segregation	73	2.74	7.65	0.0305191	0.641548	CENPW;BRCA1
GO:0007155_cell_adhesion	483	1.04	2.89	0.0348461	0.641548	SPP1;CLDN1;CDH2;LAMA4;DSC2
GO:0007156_homophilic_cell_adhesion_via_plasma_membrane_adhesion_molecules	167	1.8	5	0.0247556	0.641548	PALLD;CDH2;DSC2
GO:0007179_transforming_growth_factor_beta_receptor_signaling_pathway	101	1.98	5.48	0.0548617	0.641548	TGFBR2;SMAD7
GO:0007224_smoothened_signaling_pathway	64	3.12	8.77	0.0239222	0.641548	TGFBR2;IFT57
GO:0007398_ectoderm_development	13	7.69	22.45	0.0474518	0.641548	GRHL3
GO:0007507_heart_development	190	1.58	4.38	0.0343842	0.641548	TGFBR2;MEF2C;PDLIM3
GO:0007568_aging	165	1.82	5.07	0.0239982	0.641548	CLDN1;TGFBR2;DNMBP
GO:0007584_response_to_nutrient	68	2.94	8.23	0.0267731	0.641548	TNFRSF11B;TGFBR2
GO:0008090_retrograde_axonal_transport	11	9.09	26.95	0.0402993	0.641548	HAP1
GO:0008544_epidermis_development	80	2.5	6.96	0.0360885	0.641548	GRHL3;EMP1
GO:0008631_intrinsic_apoptotic_signaling_pathway_in_response_to_oxidative_stress	14	7.14	20.72	0.0510082	0.641548	MELK
GO:0009048_dosage_compensation_by_inactivation_of_X_chromosome	12	8.33	24.5	0.0438822	0.641548	BRCA1
GO:0009267_cellular_response_to_starvation	73	2.74	7.65	0.0305191	0.641548	SFRP1;DSC2
GO:0009749_response_to_glucose	68	2.94	8.23	0.0267731	0.641548	ILDR2;TGFBR2
GO:0010001_glial_cell_differentiation	14	7.14	20.72	0.0510082	0.641548	CDH2
GO:0010248_establishment_or_maintenance_of_transmembrane_electrochemical_gradient	14	7.14	20.72	0.0510082	0.641548	ATP1B2
GO:0010564_regulation_of_cell_cycle_process	11	9.09	26.95	0.0402993	0.641548	SFRP1
GO:0010628_positive_regulation_of_gene_expression	427	1.17	3.28	0.0220361	0.641548	EZR;MEF2C;EIF2AK3;LEF1;BRCA1
GO:0010717_regulation_of_epithelial_to_mesenchymal_transition	13	7.69	22.45	0.0474518	0.641548	SMAD7
GO:0010737_protein_kinase_A_signaling	14	7.14	20.72	0.0510082	0.641548	EZR
GO:0010745_negative_regulation_of_macrophage_derived_foam_cell_differentiation	13	7.69	22.45	0.0474518	0.641548	ABCG1
GO:0010762_regulation_of_fibroblast_migration	12	8.33	24.5	0.0438822	0.641548	PRR5L
GO:0010887_negative_regulation_of_cholesterol_storage	10	10	29.93	0.0367032	0.641548	ABCG1
GO:0014898_cardiac_muscle_hypertrophy_in_response_to_stress	14	7.14	20.72	0.0510082	0.641548	MEF2C
GO:0018105_peptidyl-serine_phosphorylation	162	1.85	5.16	0.0228863	0.641548	TGFBR2;CLSPN;EIF2AK3
GO:0019216_regulation_of_lipid_metabolic_process	92	2.17	6.03	0.0464581	0.641548	GLIPR1;TXNRD1
GO:0019674_NAD_metabolic_process	16	6.25	17.96	0.0580816	0.641548	NT5E
GO:0021542_dentate_gyrus_development	16	6.25	17.96	0.0580816	0.641548	LEF1
GO:0021670_lateral_ventricle_development	12	8.33	24.5	0.0438822	0.641548	ATP1B2
GO:0022407_regulation_of_cell-cell_adhesion	11	9.09	26.95	0.0402993	0.641548	LEF1
GO:0030007_cellular_potassium_ion_homeostasis	14	7.14	20.72	0.0510082	0.641548	ATP1B2
GO:0030033_microvillus_assembly	11	9.09	26.95	0.0402993	0.641548	EZR
GO:0030213_hyaluronan_biosynthetic_process	7	14.29	44.93	0.0258346	0.641548	CEMIP
GO:0030214_hyaluronan_catabolic_process	16	6.25	17.96	0.0580816	0.641548	CEMIP
GO:0030324_lung_development	83	2.41	6.7	0.0385864	0.641548	PDPN;CRISPLD2
GO:0031532_actin_cytoskeleton_reorganization	57	3.51	9.88	0.0192594	0.641548	ANXA1;EZR
GO:0031639_plasminogen_activation	11	9.09	26.95	0.0402993	0.641548	PLAT
GO:0032026_response_to_magnesium_ion	12	8.33	24.5	0.0438822	0.641548	TNFRSF11B
GO:0032060_bleb_assembly	10	10	29.93	0.0367032	0.641548	EMP1
GO:0032147_activation_of_protein_kinase_activity	67	2.99	8.36	0.026048	0.641548	TGFBR2;CLSPN
GO:0032230_positive_regulation_of_synaptic_transmission,_GABAergic	13	7.69	22.45	0.0474518	0.641548	HAP1
GO:0032355_response_to_estradiol	104	1.92	5.32	0.0577735	0.641548	CRYAB;ANXA1
GO:0032367_intracellular_cholesterol_transport	11	9.09	26.95	0.0402993	0.641548	ABCG1
GO:0032479_regulation_of_type_I_interferon_production	13	7.69	22.45	0.0474518	0.641548	POLA1
GO:0032508_DNA_duplex_unwinding	72	2.78	7.76	0.0297541	0.641548	ANXA1;GINS4
GO:0032736_positive_regulation_of_interleukin-13_production	12	8.33	24.5	0.0438822	0.641548	IL1RAP
GO:0032754_positive_regulation_of_interleukin-5_production	11	9.09	26.95	0.0402993	0.641548	IL1RAP
GO:0032780_negative_regulation_of_ATPase_activity	12	8.33	24.5	0.0438822	0.641548	CNN3
GO:0032926_negative_regulation_of_activin_receptor_signaling_pathway	8	12.5	38.47	0.0294709	0.641548	FST
GO:0032963_collagen_metabolic_process	14	7.14	20.72	0.0510082	0.641548	P3H2
GO:0033147_negative_regulation_of_intracellular_estrogen_receptor_signaling_pathway	13	7.69	22.45	0.0474518	0.641548	BRCA1
GO:0033169_histone_H3-K9_demethylation	14	7.14	20.72	0.0510082	0.641548	HR
GO:0033280_response_to_vitamin_D	16	6.25	17.96	0.0580816	0.641548	SPP1
GO:0033314_mitotic_DNA_replication_checkpoint	10	10	29.93	0.0367032	0.641548	CLSPN
GO:0033689_negative_regulation_of_osteoblast_proliferation	15	6.67	19.24	0.0545514	0.641548	SFRP1
GO:0033700_phospholipid_efflux	12	8.33	24.5	0.0438822	0.641548	ABCG1
GO:0033993_response_to_lipid	14	7.14	20.72	0.0510082	0.641548	ABCG1
GO:0034333_adherens_junction_assembly	11	9.09	26.95	0.0402993	0.641548	SMAD7
GO:0034374_low-density_lipoprotein_particle_remodeling	16	6.25	17.96	0.0580816	0.641548	ABCG1
GO:0035067_negative_regulation_of_histone_acetylation	10	10	29.93	0.0367032	0.641548	BRCA1
GO:0035313_wound_healing,_spreading_of_epidermal_cells	11	9.09	26.95	0.0402993	0.641548	HBEGF
GO:0035435_phosphate_ion_transmembrane_transport	15	6.67	19.24	0.0545514	0.641548	SLC20A2
GO:0036376_sodium_ion_export_across_plasma_membrane	14	7.14	20.72	0.0510082	0.641548	ATP1B2
GO:0036499_PERK-mediated_unfolded_protein_response	12	8.33	24.5	0.0438822	0.641548	EIF2AK3
GO:0042060_wound_healing	89	2.25	6.24	0.043773	0.641548	GRHL3;TGFBR2
GO:0042102_positive_regulation_of_T_cell_proliferation	61	3.28	9.21	0.021872	0.641548	ANXA1;CD274
GO:0042127_regulation_of_cell_population_proliferation	166	1.81	5.03	0.0243753	0.641548	ANXA1;TGFBR2;BRCA1
GO:0042176_regulation_of_protein_catabolic_process	16	6.25	17.96	0.0580816	0.641548	ARNTL
GO:0042475_odontogenesis_of_dentin-containing_tooth	57	3.51	9.88	0.0192594	0.641548	FST;LEF1
GO:0042493_response_to_drug	284	1.41	3.93	0.0219241	0.641548	TNFRSF11B;ANXA1;TGFBR2;SFRP1
GO:0042711_maternal_behavior	12	8.33	24.5	0.0438822	0.641548	NPAS1
GO:0042987_amyloid_precursor_protein_catabolic_process	10	10	29.93	0.0367032	0.641548	ABCG1
GO:0043101_purine-containing_compound_salvage	13	7.69	22.45	0.0474518	0.641548	GMPR
GO:0043154_negative_regulation_of_cysteine-type_endopeptidase_activity_involved_in_apoptotic_process	74	2.7	7.55	0.031292	0.641548	CRYAB;LEF1
GO:0043508_negative_regulation_of_JUN_kinase_activity	16	6.25	17.96	0.0580816	0.641548	SFRP1
GO:0043518_negative_regulation_of_DNA_damage_response,_signal_transduction_by_p53_class_mediator	15	6.67	19.24	0.0545514	0.641548	PTTG1IP
GO:0043547_positive_regulation_of_GTPase_activity	313	1.28	3.56	0.0298966	0.641548	GRHL3;RGS4;SFRP1;RSU1
GO:0043586_tongue_development	11	9.09	26.95	0.0402993	0.641548	LEF1
GO:0043616_keratinocyte_proliferation	11	9.09	26.95	0.0402993	0.641548	FST
GO:0043687_post-translational_protein_modification	344	1.16	3.23	0.0400954	0.641548	SPP1;HIF3A;EVA1A;CDH2
GO:0044267_cellular_protein_metabolic_process	225	1.33	3.69	0.0522145	0.641548	SPP1;EVA1A;CDH2
GO:0044319_wound_healing,_spreading_of_cells	15	6.67	19.24	0.0545514	0.641548	PDPN
GO:0045454_cell_redox_homeostasis	59	3.39	9.54	0.0205481	0.641548	TXNRD1;PRDX6
GO:0045471_response_to_ethanol	99	2.02	5.6	0.0529505	0.641548	RGS4;CLDN1
GO:0045744_negative_regulation_of_G_protein-coupled_receptor_signaling_pathway	14	7.14	20.72	0.0510082	0.641548	RGS4
GO:0045779_negative_regulation_of_bone_resorption	15	6.67	19.24	0.0545514	0.641548	TNFRSF11B
GO:0045943_positive_regulation_of_transcription_by_RNA_polymerase_I	11	9.09	26.95	0.0402993	0.641548	EIF2AK3
GO:0046007_negative_regulation_of_activated_T_cell_proliferation	14	7.14	20.72	0.0510082	0.641548	CD274
GO:0046135_pyrimidine_nucleoside_catabolic_process	11	9.09	26.95	0.0402993	0.641548	NT5E
GO:0046475_glycerophospholipid_catabolic_process	15	6.67	19.24	0.0545514	0.641548	PRDX6
GO:0046685_response_to_arsenic-containing_substance	13	7.69	22.45	0.0474518	0.641548	TNFRSF11B
GO:0046718_viral_entry_into_host_cell	88	2.27	6.31	0.0428913	0.641548	SLC20A2;CLDN1
GO:0046855_inositol_phosphate_dephosphorylation	16	6.25	17.96	0.0580816	0.641548	SYNJ2
GO:0048009_insulin-like_growth_factor_receptor_signaling_pathway	13	7.69	22.45	0.0474518	0.641548	EIF2AK3
GO:0048546_digestive_tract_morphogenesis	14	7.14	20.72	0.0510082	0.641548	SFRP1
GO:0048661_positive_regulation_of_smooth_muscle_cell_proliferation	58	3.45	9.71	0.0198994	0.641548	HBEGF;TGFBR2
GO:0048703_embryonic_viscerocranium_morphogenesis	11	9.09	26.95	0.0402993	0.641548	MEF2C
GO:0048872_homeostasis_of_number_of_cells	16	6.25	17.96	0.0580816	0.641548	CDH2
GO:0050679_positive_regulation_of_epithelial_cell_proliferation	59	3.39	9.54	0.0205481	0.641548	TGFA;SFRP1
GO:0050680_negative_regulation_of_epithelial_cell_proliferation	62	3.23	9.06	0.0225468	0.641548	IFT57;SFRP1
GO:0050708_regulation_of_protein_secretion	16	6.25	17.96	0.0580816	0.641548	DNAJC1
GO:0050732_negative_regulation_of_peptidyl-tyrosine_phosphorylation	13	7.69	22.45	0.0474518	0.641548	SFRP1
GO:0050821_protein_stabilization	184	1.63	4.53	0.03171	0.641548	CRYAB;SMAD7;ATP1B2
GO:0050909_sensory_perception_of_taste	14	7.14	20.72	0.0510082	0.641548	LEF1
GO:0050910_detection_of_mechanical_stimulus_involved_in_sensory_perception_of_sound	13	7.69	22.45	0.0474518	0.641548	COL11A1
GO:0051145_smooth_muscle_cell_differentiation	13	7.69	22.45	0.0474518	0.641548	MEF2C
GO:0051146_striated_muscle_cell_differentiation	14	7.14	20.72	0.0510082	0.641548	CDH2
GO:0051272_positive_regulation_of_cellular_component_movement	10	10	29.93	0.0367032	0.641548	PDPN
GO:0051276_chromosome_organization	15	6.67	19.24	0.0545514	0.641548	CENPW
GO:0051382_kinetochore_assembly	14	7.14	20.72	0.0510082	0.641548	CENPW
GO:0051549_positive_regulation_of_keratinocyte_migration	12	8.33	24.5	0.0438822	0.641548	HBEGF
GO:0051571_positive_regulation_of_histone_H3-K4_methylation	16	6.25	17.96	0.0580816	0.641548	BRCA1
GO:0051775_response_to_redox_state	11	9.09	26.95	0.0402993	0.641548	ARNTL
GO:0055091_phospholipid_homeostasis	13	7.69	22.45	0.0474518	0.641548	ABCG1
GO:0055093_response_to_hyperoxia	15	6.67	19.24	0.0545514	0.641548	PDPN
GO:0060070_canonical_Wnt_signaling_pathway	68	2.94	8.23	0.0267731	0.641548	SFRP1;LEF1
GO:0060100_positive_regulation_of_phagocytosis,_engulfment	12	8.33	24.5	0.0438822	0.641548	RAB31
GO:0060218_hematopoietic_stem_cell_differentiation	16	6.25	17.96	0.0580816	0.641548	SFRP1
GO:0060326_cell_chemotaxis	69	2.9	8.11	0.0275064	0.641548	HBEGF;LEF1
GO:0060766_negative_regulation_of_androgen_receptor_signaling_pathway	15	6.67	19.24	0.0545514	0.641548	SFRP1
GO:0060998_regulation_of_dendritic_spine_development	10	10	29.93	0.0367032	0.641548	MEF2C
GO:0061014_positive_regulation_of_mRNA_catabolic_process	12	8.33	24.5	0.0438822	0.641548	PRR5L
GO:0061029_eyelid_development_in_camera-type_eye	13	7.69	22.45	0.0474518	0.641548	GRHL3
GO:0061052_negative_regulation_of_cell_growth_involved_in_cardiac_muscle_cell_development	13	7.69	22.45	0.0474518	0.641548	RGS4
GO:0061351_neural_precursor_cell_proliferation	12	8.33	24.5	0.0438822	0.641548	MELK
GO:0061462_protein_localization_to_lysosome	11	9.09	26.95	0.0402993	0.641548	RNF128
GO:0070365_hepatocyte_differentiation	13	7.69	22.45	0.0474518	0.641548	ANXA1
GO:0070417_cellular_response_to_cold	11	9.09	26.95	0.0402993	0.641548	EIF2AK3
GO:0070528_protein_kinase_C_signaling	14	7.14	20.72	0.0510082	0.641548	FIBIN
GO:0070593_dendrite_self-avoidance	16	6.25	17.96	0.0580816	0.641548	PALLD
GO:0071305_cellular_response_to_vitamin_D	14	7.14	20.72	0.0510082	0.641548	SFRP1
GO:0071363_cellular_response_to_growth_factor_stimulus	59	3.39	9.54	0.0205481	0.641548	TGFBR2;SFRP1
GO:0071380_cellular_response_to_prostaglandin_E_stimulus	16	6.25	17.96	0.0580816	0.641548	SFRP1
GO:0071391_cellular_response_to_estrogen_stimulus	16	6.25	17.96	0.0580816	0.641548	SFRP1
GO:0071498_cellular_response_to_fluid_shear_stress	12	8.33	24.5	0.0438822	0.641548	MEF2C
GO:0072425_signal_transduction_involved_in_G2_DNA_damage_checkpoint	11	9.09	26.95	0.0402993	0.641548	BRCA1
GO:0072659_protein_localization_to_plasma_membrane	152	1.97	5.51	0.0193883	0.641548	SYTL2;EZR;CDH2
GO:0085020_protein_K6-linked_ubiquitination	9	11.11	33.66	0.0330937	0.641548	BRCA1
GO:0086064_cell_communication_by_electrical_coupling_involved_in_cardiac_conduction	14	7.14	20.72	0.0510082	0.641548	ATP1B2
GO:0090557_establishment_of_endothelial_intestinal_barrier	11	9.09	26.95	0.0402993	0.641548	CLDN1
GO:0098869_cellular_oxidant_detoxification	77	2.6	7.24	0.0336564	0.641548	TXNRD1;PRDX6
GO:0098911_regulation_of_ventricular_cardiac_muscle_cell_action_potential	11	9.09	26.95	0.0402993	0.641548	DSC2
GO:0099151_regulation_of_postsynaptic_density_assembly	12	8.33	24.5	0.0438822	0.641548	IL1RAP
GO:1901380_negative_regulation_of_potassium_ion_transmembrane_transport	10	10	29.93	0.0367032	0.641548	RGS4
GO:1901985_positive_regulation_of_protein_acetylation	11	9.09	26.95	0.0402993	0.641548	ARNTL
GO:1902043_positive_regulation_of_extrinsic_apoptotic_signaling_pathway_via_death_domain_receptors	12	8.33	24.5	0.0438822	0.641548	SFRP1
GO:1902430_negative_regulation_of_amyloid-beta_formation	14	7.14	20.72	0.0510082	0.641548	HAP1
GO:1903753_negative_regulation_of_p38MAPK_cascade	9	11.11	33.66	0.0330937	0.641548	EZR
GO:1990830_cellular_response_to_leukemia_inhibitory_factor	97	2.06	5.71	0.0510639	0.641548	ABCG4;SMAD7
GO:2000727_positive_regulation_of_cardiac_muscle_cell_differentiation	13	7.69	22.45	0.0474518	0.641548	MEF2C
GO:2000772_regulation_of_cellular_senescence	12	8.33	24.5	0.0438822	0.641548	ARNTL
GO:0006936_muscle_contraction	105	1.9	5.27	0.0587559	0.646538	CRYAB;TPM4
GO:0030224_monocyte_differentiation	17	5.88	16.83	0.0615987	0.655474	MEF2C
GO:0043523_regulation_of_neuron_apoptotic_process	17	5.88	16.83	0.0615987	0.655474	MEF2C
GO:0043691_reverse_cholesterol_transport	17	5.88	16.83	0.0615987	0.655474	ABCG1
GO:0043923_positive_regulation_by_host_of_viral_transcription	17	5.88	16.83	0.0615987	0.655474	LEF1
GO:0044030_regulation_of_DNA_methylation	17	5.88	16.83	0.0615987	0.655474	BRCA1
GO:0045717_negative_regulation_of_fatty_acid_biosynthetic_process	17	5.88	16.83	0.0615987	0.655474	BRCA1
GO:0047496_vesicle_transport_along_microtubule	17	5.88	16.83	0.0615987	0.655474	HAP1
GO:0048535_lymph_node_development	17	5.88	16.83	0.0615987	0.655474	PDPN
GO:0051259_protein_complex_oligomerization	17	5.88	16.83	0.0615987	0.655474	CLDN1
GO:0006883_cellular_sodium_ion_homeostasis	18	5.56	15.84	0.0651028	0.665929	ATP1B2
GO:0007219_Notch_signaling_pathway	110	1.82	5.02	0.063754	0.665929	S1PR3;TGFBR2
GO:0010259_multicellular_organism_aging	18	5.56	15.84	0.0651028	0.665929	CRYAB
GO:0022409_positive_regulation_of_cell-cell_adhesion	18	5.56	15.84	0.0651028	0.665929	SMAD7
GO:0034375_high-density_lipoprotein_particle_remodeling	18	5.56	15.84	0.0651028	0.665929	ABCG1
GO:0035066_positive_regulation_of_histone_acetylation	18	5.56	15.84	0.0651028	0.665929	BRCA1
GO:0035162_embryonic_hemopoiesis	18	5.56	15.84	0.0651028	0.665929	TGFBR2
GO:0043011_myeloid_dendritic_cell_differentiation	18	5.56	15.84	0.0651028	0.665929	TGFBR2
GO:0046597_negative_regulation_of_viral_entry_into_host_cell	18	5.56	15.84	0.0651028	0.665929	PTX3
GO:0046847_filopodium_assembly	18	5.56	15.84	0.0651028	0.665929	EZR
GO:0061028_establishment_of_endothelial_barrier	18	5.56	15.84	0.0651028	0.665929	EZR
GO:0007189_adenylate_cyclase-activating_G_protein-coupled_receptor_signaling_pathway	113	1.77	4.89	0.0668196	0.678709	S1PR3;CALCB
GO:0070268_cornification	113	1.77	4.89	0.0668196	0.678709	KRT75;DSC2
GO:0005978_glycogen_biosynthetic_process	19	5.26	14.97	0.068594	0.680087	PGM2
GO:0030220_platelet_formation	19	5.26	14.97	0.068594	0.680087	MEF2C
GO:0031589_cell-substrate_adhesion	19	5.26	14.97	0.068594	0.680087	ATP1B2
GO:0032924_activin_receptor_signaling_pathway	19	5.26	14.97	0.068594	0.680087	TGFBR2
GO:0045780_positive_regulation_of_bone_resorption	19	5.26	14.97	0.068594	0.680087	SPP1
GO:0045995_regulation_of_embryonic_development	19	5.26	14.97	0.068594	0.680087	LAMA4
GO:0046928_regulation_of_neurotransmitter_secretion	19	5.26	14.97	0.068594	0.680087	MEF2C
GO:0007276_gamete_generation	20	5	14.18	0.0720722	0.69099	FST
GO:0010165_response_to_X-ray	20	5	14.18	0.0720722	0.69099	ANXA1
GO:0010875_positive_regulation_of_cholesterol_efflux	20	5	14.18	0.0720722	0.69099	ABCG1
GO:0019222_regulation_of_metabolic_process	20	5	14.18	0.0720722	0.69099	S1PR3
GO:0042730_fibrinolysis	20	5	14.18	0.0720722	0.69099	PLAT
GO:0045055_regulated_exocytosis	20	5	14.18	0.0720722	0.69099	RAB31
GO:0048011_neurotrophin_TRK_receptor_signaling_pathway	20	5	14.18	0.0720722	0.69099	HAP1
GO:0048514_blood_vessel_morphogenesis	20	5	14.18	0.0720722	0.69099	CDH2
GO:0055117_regulation_of_cardiac_muscle_contraction	20	5	14.18	0.0720722	0.69099	SMAD7
GO:1902004_positive_regulation_of_amyloid-beta_formation	20	5	14.18	0.0720722	0.69099	ABCG1
GO:0000165_MAPK_cascade	260	1.15	3.18	0.0736687	0.696625	HBEGF;TGFA;MEF2C
GO:0001502_cartilage_condensation	21	4.76	13.47	0.0755376	0.696625	COL11A1
GO:0007015_actin_filament_organization	119	1.68	4.64	0.0730942	0.696625	TPM4;PDLIM3
GO:0007095_mitotic_G2_DNA_damage_checkpoint	21	4.76	13.47	0.0755376	0.696625	CLSPN
GO:0010801_negative_regulation_of_peptidyl-threonine_phosphorylation	21	4.76	13.47	0.0755376	0.696625	SMAD7
GO:0016338_calcium-independent_cell-cell_adhesion_via_plasma_membrane_cell-adhesion_molecules	21	4.76	13.47	0.0755376	0.696625	CLDN1
GO:0030318_melanocyte_differentiation	21	4.76	13.47	0.0755376	0.696625	MEF2C
GO:0035567_non-canonical_Wnt_signaling_pathway	21	4.76	13.47	0.0755376	0.696625	SFRP1
GO:0048854_brain_morphogenesis	21	4.76	13.47	0.0755376	0.696625	CDH2
GO:0050770_regulation_of_axonogenesis	21	4.76	13.47	0.0755376	0.696625	CDH2
GO:0071542_dopaminergic_neuron_differentiation	21	4.76	13.47	0.0755376	0.696625	SFRP1
GO:2000311_regulation_of_AMPA_receptor_activity	21	4.76	13.47	0.0755376	0.696625	MEF2C
GO:0033209_tumor_necrosis_factor-mediated_signaling_pathway	122	1.64	4.52	0.0763004	0.701433	TNFRSF11B;TNFRSF19
GO:0001782_B_cell_homeostasis	22	4.55	12.82	0.0789902	0.702226	MEF2C
GO:0002053_positive_regulation_of_mesenchymal_cell_proliferation	23	4.35	12.24	0.08243	0.702226	TGFBR2
GO:0006914_autophagy	126	1.59	4.37	0.0806437	0.702226	EVA1A;HAP1
GO:0007369_gastrulation	23	4.35	12.24	0.08243	0.702226	TGFBR2
GO:0008285_negative_regulation_of_cell_population_proliferation	433	0.92	2.55	0.0790689	0.702226	BTG3;PDPN;SFRP1;P3H2
GO:0010460_positive_regulation_of_heart_rate	22	4.55	12.82	0.0789902	0.702226	RGS4
GO:0017015_regulation_of_transforming_growth_factor_beta_receptor_signaling_pathway	22	4.55	12.82	0.0789902	0.702226	SMAD7
GO:0030111_regulation_of_Wnt_signaling_pathway	23	4.35	12.24	0.08243	0.702226	LEF1
GO:0030308_negative_regulation_of_cell_growth	126	1.59	4.37	0.0806437	0.702226	CRYAB;SFRP1
GO:0030879_mammary_gland_development	22	4.55	12.82	0.0789902	0.702226	LEF1
GO:0032693_negative_regulation_of_interleukin-10_production	23	4.35	12.24	0.08243	0.702226	CD274
GO:0032703_negative_regulation_of_interleukin-2_production	23	4.35	12.24	0.08243	0.702226	EZR
GO:0043401_steroid_hormone_mediated_signaling_pathway	23	4.35	12.24	0.08243	0.702226	LEF1
GO:0044458_motile_cilium_assembly	23	4.35	12.24	0.08243	0.702226	IFT57
GO:0045216_cell-cell_junction_organization	22	4.55	12.82	0.0789902	0.702226	CLDN1
GO:0045663_positive_regulation_of_myoblast_differentiation	22	4.55	12.82	0.0789902	0.702226	MEF2C
GO:0045742_positive_regulation_of_epidermal_growth_factor_receptor_signaling_pathway	23	4.35	12.24	0.08243	0.702226	HAP1
GO:0048026_positive_regulation_of_mRNA_splicing,_via_spliceosome	23	4.35	12.24	0.08243	0.702226	PRDX6
GO:0048844_artery_morphogenesis	23	4.35	12.24	0.08243	0.702226	SMAD7
GO:0050860_negative_regulation_of_T_cell_receptor_signaling_pathway	23	4.35	12.24	0.08243	0.702226	EZR
GO:0060044_negative_regulation_of_cardiac_muscle_cell_proliferation	23	4.35	12.24	0.08243	0.702226	TGFBR2
GO:0071385_cellular_response_to_glucocorticoid_stimulus	23	4.35	12.24	0.08243	0.702226	ANXA1
GO:0090316_positive_regulation_of_intracellular_protein_transport	23	4.35	12.24	0.08243	0.702226	PRR5L
GO:0097150_neuronal_stem_cell_population_maintenance	23	4.35	12.24	0.08243	0.702226	CDH2
GO:1904753_negative_regulation_of_vascular_associated_smooth_muscle_cell_migration	22	4.55	12.82	0.0789902	0.702226	MEF2C
GO:0031016_pancreas_development	24	4.17	11.71	0.0858571	0.725043	ILDR2
GO:0050482_arachidonic_acid_secretion	24	4.17	11.71	0.0858571	0.725043	ANXA1
GO:0090103_cochlea_morphogenesis	24	4.17	11.71	0.0858571	0.725043	GRHL3
GO:0009653_anatomical_structure_morphogenesis	131	1.53	4.2	0.086178	0.725644	S1PR3;SMAD7
GO:0000086_G2/M_transition_of_mitotic_cell_cycle	133	1.5	4.14	0.0884233	0.734657	MELK;WEE1
GO:0000188_inactivation_of_MAPK_activity	25	4	11.22	0.0892715	0.734657	RGS4
GO:0045671_negative_regulation_of_osteoclast_differentiation	25	4	11.22	0.0892715	0.734657	SFRP1
GO:0046697_decidualization	25	4	11.22	0.0892715	0.734657	SPP1
GO:0050709_negative_regulation_of_protein_secretion	25	4	11.22	0.0892715	0.734657	ANXA1
GO:0051894_positive_regulation_of_focal_adhesion_assembly	25	4	11.22	0.0892715	0.734657	SFRP1
GO:0071353_cellular_response_to_interleukin-4	25	4	11.22	0.0892715	0.734657	LEF1
GO:0099560_synaptic_membrane_adhesion	25	4	11.22	0.0892715	0.734657	IL1RAP
GO:0006259_DNA_metabolic_process	26	3.85	10.77	0.0926733	0.754107	NT5E
GO:0032743_positive_regulation_of_interleukin-2_production	26	3.85	10.77	0.0926733	0.754107	ANXA1
GO:0043278_response_to_morphine	26	3.85	10.77	0.0926733	0.754107	RGS4
GO:2000463_positive_regulation_of_excitatory_postsynaptic_potential	26	3.85	10.77	0.0926733	0.754107	RGS4
GO:0001816_cytokine_production	27	3.7	10.36	0.0960626	0.754221	S1PR3
GO:0001954_positive_regulation_of_cell-matrix_adhesion	27	3.7	10.36	0.0960626	0.754221	SFRP1
GO:0003148_outflow_tract_septum_morphogenesis	27	3.7	10.36	0.0960626	0.754221	TGFBR2
GO:0007417_central_nervous_system_development	139	1.44	3.96	0.095262	0.754221	GRHL3;NPAS1
GO:0010033_response_to_organic_substance	27	3.7	10.36	0.0960626	0.754221	ABCG1
GO:0015949_nucleobase-containing_small_molecule_interconversion	27	3.7	10.36	0.0960626	0.754221	TXNRD1
GO:0018149_peptide_cross-linking	27	3.7	10.36	0.0960626	0.754221	ANXA1
GO:0031214_biomineral_tissue_development	27	3.7	10.36	0.0960626	0.754221	SPP1
GO:0033137_negative_regulation_of_peptidyl-serine_phosphorylation	27	3.7	10.36	0.0960626	0.754221	SMAD7
GO:0051403_stress-activated_MAPK_cascade	27	3.7	10.36	0.0960626	0.754221	CRYAB
GO:0071158_positive_regulation_of_cell_cycle_arrest	27	3.7	10.36	0.0960626	0.754221	BRCA1
GO:1900182_positive_regulation_of_protein_localization_to_nucleus	27	3.7	10.36	0.0960626	0.754221	EIF2AK3
GO:2000379_positive_regulation_of_reactive_oxygen_species_metabolic_process	27	3.7	10.36	0.0960626	0.754221	TGFBR2
GO:0000083_regulation_of_transcription_involved_in_G1/S_transition_of_mitotic_cell_cycle	29	3.45	9.62	0.102803	0.763795	POLA1
GO:0001958_endochondral_ossification	29	3.45	9.62	0.102803	0.763795	MEF2C
GO:0006955_immune_response	299	1	2.76	0.101427	0.763795	SECTM1;IL1RAP;CD274
GO:0007605_sensory_perception_of_sound	144	1.39	3.82	0.101074	0.763795	COL11A1;CEMIP
GO:0031069_hair_follicle_morphogenesis	28	3.57	9.97	0.0994392	0.763795	FST
GO:0035987_endodermal_cell_differentiation	28	3.57	9.97	0.0994392	0.763795	COL11A1
GO:0042073_intraciliary_transport	28	3.57	9.97	0.0994392	0.763795	IFT57
GO:0042744_hydrogen_peroxide_catabolic_process	28	3.57	9.97	0.0994392	0.763795	PRDX6
GO:0043001_Golgi_to_plasma_membrane_protein_transport	29	3.45	9.62	0.102803	0.763795	RAB31
GO:0045840_positive_regulation_of_mitotic_nuclear_division	28	3.57	9.97	0.0994392	0.763795	TGFA
GO:0046676_negative_regulation_of_insulin_secretion	29	3.45	9.62	0.102803	0.763795	SFRP1
GO:0048147_negative_regulation_of_fibroblast_proliferation	29	3.45	9.62	0.102803	0.763795	SFRP1
GO:0048565_digestive_tract_development	29	3.45	9.62	0.102803	0.763795	TGFBR2
GO:0048873_homeostasis_of_number_of_cells_within_a_tissue	28	3.57	9.97	0.0994392	0.763795	ILDR2
GO:0050769_positive_regulation_of_neurogenesis	29	3.45	9.62	0.102803	0.763795	HAP1
GO:0051281_positive_regulation_of_release_of_sequestered_calcium_ion_into_cytosol	29	3.45	9.62	0.102803	0.763795	CEMIP
GO:0051924_regulation_of_calcium_ion_transport	28	3.57	9.97	0.0994392	0.763795	RGS4
GO:1904837_beta-catenin-TCF_complex_assembly	29	3.45	9.62	0.102803	0.763795	LEF1
GO:1905563_negative_regulation_of_vascular_endothelial_cell_proliferation	28	3.57	9.97	0.0994392	0.763795	MEF2C
GO:2000145_regulation_of_cell_motility	29	3.45	9.62	0.102803	0.763795	HBEGF
GO:2000310_regulation_of_NMDA_receptor_activity	29	3.45	9.62	0.102803	0.763795	MEF2C
GO:0006284_base-excision_repair	30	3.33	9.28	0.106155	0.770952	NEIL1
GO:0006470_protein_dephosphorylation	148	1.35	3.71	0.105792	0.770952	LRRC2;PTPN21
GO:0007498_mesoderm_development	30	3.33	9.28	0.106155	0.770952	SECTM1
GO:0010800_positive_regulation_of_peptidyl-threonine_phosphorylation	30	3.33	9.28	0.106155	0.770952	CEMIP
GO:0043392_negative_regulation_of_DNA_binding	30	3.33	9.28	0.106155	0.770952	LEF1
GO:0046856_phosphatidylinositol_dephosphorylation	30	3.33	9.28	0.106155	0.770952	SYNJ2
GO:0071480_cellular_response_to_gamma_radiation	30	3.33	9.28	0.106155	0.770952	CRYAB
GO:0090263_positive_regulation_of_canonical_Wnt_signaling_pathway	147	1.36	3.74	0.104607	0.770952	ARNTL;SFRP1
GO:0090314_positive_regulation_of_protein_targeting_to_membrane	30	3.33	9.28	0.106155	0.770952	CEMIP
GO:0002040_sprouting_angiogenesis	31	3.23	8.98	0.109495	0.775809	LEF1
GO:0007093_mitotic_cell_cycle_checkpoint	31	3.23	8.98	0.109495	0.775809	WEE1
GO:0008089_anterograde_axonal_transport	31	3.23	8.98	0.109495	0.775809	HAP1
GO:0010975_regulation_of_neuron_projection_development	31	3.23	8.98	0.109495	0.775809	SFRP1
GO:0017157_regulation_of_exocytosis	31	3.23	8.98	0.109495	0.775809	HAP1
GO:0031032_actomyosin_structure_organization	31	3.23	8.98	0.109495	0.775809	CNN3
GO:0032007_negative_regulation_of_TOR_signaling	31	3.23	8.98	0.109495	0.775809	ARNTL
GO:0035633_maintenance_of_blood-brain_barrier	31	3.23	8.98	0.109495	0.775809	CLDN1
GO:0038128_ERBB2_signaling_pathway	31	3.23	8.98	0.109495	0.775809	HBEGF
GO:0045739_positive_regulation_of_DNA_repair	31	3.23	8.98	0.109495	0.775809	BRCA1
GO:0045766_positive_regulation_of_angiogenesis	152	1.32	3.61	0.11057	0.781522	TGFBR2;BRCA1
GO:0000077_DNA_damage_checkpoint	32	3.12	8.69	0.112822	0.782211	CLSPN
GO:0001707_mesoderm_formation	32	3.12	8.69	0.112822	0.782211	TXNRD1
GO:0001974_blood_vessel_remodeling	32	3.12	8.69	0.112822	0.782211	MEF2C
GO:0003333_amino_acid_transmembrane_transport	32	3.12	8.69	0.112822	0.782211	PDPN
GO:0048008_platelet-derived_growth_factor_receptor_signaling_pathway	32	3.12	8.69	0.112822	0.782211	PLAT
GO:0048701_embryonic_cranial_skeleton_morphogenesis	32	3.12	8.69	0.112822	0.782211	TGFBR2
GO:0097421_liver_regeneration	32	3.12	8.69	0.112822	0.782211	CLDN1
GO:1905606_regulation_of_presynapse_assembly	32	3.12	8.69	0.112822	0.782211	IL1RAP
GO:0001975_response_to_amphetamine	33	3.03	8.41	0.116136	0.790107	RGS4
GO:0006904_vesicle_docking_involved_in_exocytosis	33	3.03	8.41	0.116136	0.790107	SYTL2
GO:0035924_cellular_response_to_vascular_endothelial_growth_factor_stimulus	33	3.03	8.41	0.116136	0.790107	ANXA1
GO:0040018_positive_regulation_of_multicellular_organism_growth	33	3.03	8.41	0.116136	0.790107	EZR
GO:0045765_regulation_of_angiogenesis	33	3.03	8.41	0.116136	0.790107	SFRP1
GO:0050767_regulation_of_neurogenesis	33	3.03	8.41	0.116136	0.790107	ARNTL
GO:0050772_positive_regulation_of_axonogenesis	33	3.03	8.41	0.116136	0.790107	CHODL
GO:0071773_cellular_response_to_BMP_stimulus	33	3.03	8.41	0.116136	0.790107	SFRP1
GO:0000122_negative_regulation_of_transcription_by_RNA_polymerase_II	894	0.67	1.86	0.117645	0.798503	FST;EZR;MEF2C;SMAD7;NPAS1;LEF1
GO:0007029_endoplasmic_reticulum_organization	34	2.94	8.16	0.119439	0.805033	EIF2AK3
GO:0045930_negative_regulation_of_mitotic_cell_cycle	34	2.94	8.16	0.119439	0.805033	BTG3
GO:0051017_actin_filament_bundle_assembly	34	2.94	8.16	0.119439	0.805033	EZR
GO:0008016_regulation_of_heart_contraction	35	2.86	7.92	0.122729	0.819603	HBEGF
GO:0009409_response_to_cold	35	2.86	7.92	0.122729	0.819603	GMPR
GO:0030010_establishment_of_cell_polarity	35	2.86	7.92	0.122729	0.819603	WEE1
GO:0042220_response_to_cocaine	35	2.86	7.92	0.122729	0.819603	RGS4
GO:0006457_protein_folding	163	1.23	3.36	0.123989	0.826121	CRYAB;DNAJC1
GO:0001895_retina_homeostasis	37	2.7	7.48	0.129273	0.832678	ATP1B2
GO:0001942_hair_follicle_development	37	2.7	7.48	0.129273	0.832678	TNFRSF19
GO:0007223_Wnt_signaling_pathway,_calcium_modulating_pathway	37	2.7	7.48	0.129273	0.832678	LEF1
GO:0008219_cell_death	36	2.78	7.69	0.126007	0.832678	EMP1
GO:0010634_positive_regulation_of_epithelial_cell_migration	37	2.7	7.48	0.129273	0.832678	TGFBR2
GO:0010811_positive_regulation_of_cell-substrate_adhesion	37	2.7	7.48	0.129273	0.832678	RSU1
GO:0030177_positive_regulation_of_Wnt_signaling_pathway	36	2.78	7.69	0.126007	0.832678	SFRP1
GO:0031333_negative_regulation_of_protein-containing_complex_assembly	36	2.78	7.69	0.126007	0.832678	CRYAB
GO:0032717_negative_regulation_of_interleukin-8_production	37	2.7	7.48	0.129273	0.832678	ANXA1
GO:0045880_positive_regulation_of_smoothened_signaling_pathway	37	2.7	7.48	0.129273	0.832678	SFRP1
GO:0048488_synaptic_vesicle_endocytosis	37	2.7	7.48	0.129273	0.832678	SYNJ2
GO:0051225_spindle_assembly	37	2.7	7.48	0.129273	0.832678	CENPW
GO:0070555_response_to_interleukin-1	37	2.7	7.48	0.129273	0.832678	ANXA1
GO:0071222_cellular_response_to_lipopolysaccharide	167	1.2	3.28	0.128964	0.832678	MEF2C;CD274
GO:0090050_positive_regulation_of_cell_migration_involved_in_sprouting_angiogenesis	37	2.7	7.48	0.129273	0.832678	ANXA1
GO:0002062_chondrocyte_differentiation	38	2.63	7.28	0.132527	0.833312	MEF2C
GO:0030036_actin_cytoskeleton_organization	168	1.19	3.26	0.130214	0.833312	PALLD;PDLIM3
GO:0030049_muscle_filament_sliding	38	2.63	7.28	0.132527	0.833312	TPM4
GO:0032689_negative_regulation_of_interferon-gamma_production	38	2.63	7.28	0.132527	0.833312	CD274
GO:0032733_positive_regulation_of_interleukin-10_production	38	2.63	7.28	0.132527	0.833312	CD274
GO:0043967_histone_H4_acetylation	38	2.63	7.28	0.132527	0.833312	LEF1
GO:0050853_B_cell_receptor_signaling_pathway	38	2.63	7.28	0.132527	0.833312	MEF2C
GO:0060045_positive_regulation_of_cardiac_muscle_cell_proliferation	38	2.63	7.28	0.132527	0.833312	MEF2C
GO:0071392_cellular_response_to_estradiol_stimulus	38	2.63	7.28	0.132527	0.833312	SFRP1
GO:0098742_cell-cell_adhesion_via_plasma-membrane_adhesion_molecules	38	2.63	7.28	0.132527	0.833312	CDH2
GO:1902042_negative_regulation_of_extrinsic_apoptotic_signaling_pathway_via_death_domain_receptors	38	2.63	7.28	0.132527	0.833312	BRCA1
GO:0006289_nucleotide-excision_repair	39	2.56	7.09	0.135768	0.839165	NEIL1
GO:0030030_cell_projection_organization	39	2.56	7.09	0.135768	0.839165	HAP1
GO:0030326_embryonic_limb_morphogenesis	39	2.56	7.09	0.135768	0.839165	LEF1
GO:0030501_positive_regulation_of_bone_mineralization	39	2.56	7.09	0.135768	0.839165	MEF2C
GO:0046777_protein_autophosphorylation	171	1.17	3.2	0.133984	0.839165	MELK;EIF2AK3
GO:0055114_oxidation-reduction_process	528	0.76	2.08	0.135385	0.839165	HR;GMPR;PRDX6;P3H2
GO:0086091_regulation_of_heart_rate_by_cardiac_conduction	39	2.56	7.09	0.135768	0.839165	DSC2
GO:1904706_negative_regulation_of_vascular_associated_smooth_muscle_cell_proliferation	39	2.56	7.09	0.135768	0.839165	MEF2C
GO:0002250_adaptive_immune_response	173	1.16	3.17	0.136511	0.841963	ANXA1;CD274
GO:0007098_centrosome_cycle	40	2.5	6.9	0.138998	0.850084	BRCA1
GO:0035735_intraciliary_transport_involved_in_cilium_assembly	40	2.5	6.9	0.138998	0.850084	IFT57
GO:0042130_negative_regulation_of_T_cell_proliferation	40	2.5	6.9	0.138998	0.850084	CD274
GO:0051480_regulation_of_cytosolic_calcium_ion_concentration	40	2.5	6.9	0.138998	0.850084	CALCB
GO:0009968_negative_regulation_of_signal_transduction	41	2.44	6.73	0.142216	0.858915	PRR5L
GO:0016339_calcium-dependent_cell-cell_adhesion_via_plasma_membrane_cell_adhesion_molecules	41	2.44	6.73	0.142216	0.858915	CDH2
GO:0030890_positive_regulation_of_B_cell_proliferation	41	2.44	6.73	0.142216	0.858915	MEF2C
GO:0043966_histone_H3_acetylation	41	2.44	6.73	0.142216	0.858915	LEF1
GO:0045494_photoreceptor_cell_maintenance	41	2.44	6.73	0.142216	0.858915	ATP1B2
GO:0070317_negative_regulation_of_G0_to_G1_transition	41	2.44	6.73	0.142216	0.858915	BRCA1
GO:0051897_positive_regulation_of_protein_kinase_B_signaling	178	1.12	3.07	0.142874	0.8611	HBEGF;TGFA
GO:0031424_keratinization	179	1.12	3.06	0.144155	0.867018	KRT75;DSC2
GO:0001837_epithelial_to_mesenchymal_transition	42	2.38	6.57	0.145422	0.871033	LEF1
GO:0048704_embryonic_skeletal_system_morphogenesis	42	2.38	6.57	0.145422	0.871033	COL11A1
GO:0006605_protein_targeting	43	2.33	6.41	0.148616	0.87572	HAP1
GO:0006633_fatty_acid_biosynthetic_process	43	2.33	6.41	0.148616	0.87572	BRCA1
GO:0008277_regulation_of_G_protein-coupled_receptor_signaling_pathway	43	2.33	6.41	0.148616	0.87572	RGS4
GO:0008630_intrinsic_apoptotic_signaling_pathway_in_response_to_DNA_damage	43	2.33	6.41	0.148616	0.87572	BRCA1
GO:0031100_animal_organ_regeneration	43	2.33	6.41	0.148616	0.87572	TGFBR2
GO:0034080_CENP-A_containing_nucleosome_assembly	43	2.33	6.41	0.148616	0.87572	CENPW
GO:0090090_negative_regulation_of_canonical_Wnt_signaling_pathway	181	1.1	3.02	0.146723	0.87572	SFRP1;CDH2
GO:1990573_potassium_ion_import_across_plasma_membrane	43	2.33	6.41	0.148616	0.87572	ATP1B2
GO:0001756_somitogenesis	44	2.27	6.26	0.151798	0.877199	LEF1
GO:0002548_monocyte_chemotaxis	44	2.27	6.26	0.151798	0.877199	ANXA1
GO:0010212_response_to_ionizing_radiation	44	2.27	6.26	0.151798	0.877199	BRCA1
GO:0034097_response_to_cytokine	44	2.27	6.26	0.151798	0.877199	CD274
GO:0034198_cellular_response_to_amino_acid_starvation	44	2.27	6.26	0.151798	0.877199	EIF2AK3
GO:0034332_adherens_junction_organization	44	2.27	6.26	0.151798	0.877199	CDH2
GO:0043123_positive_regulation_of_I-kappaB_kinase/NF-kappaB_signaling	185	1.08	2.96	0.151887	0.877199	TNFRSF19;SECTM1
GO:0043537_negative_regulation_of_blood_vessel_endothelial_cell_migration	44	2.27	6.26	0.151798	0.877199	MEF2C
GO:0045596_negative_regulation_of_cell_differentiation	44	2.27	6.26	0.151798	0.877199	FST
GO:0120009_intermembrane_lipid_transfer	44	2.27	6.26	0.151798	0.877199	ABCG1
GO:0022008_neurogenesis	45	2.22	6.12	0.154969	0.886191	HAP1
GO:0030282_bone_mineralization	45	2.22	6.12	0.154969	0.886191	EIF2AK3
GO:0035914_skeletal_muscle_cell_differentiation	45	2.22	6.12	0.154969	0.886191	MEF2C
GO:0045429_positive_regulation_of_nitric_oxide_biosynthetic_process	45	2.22	6.12	0.154969	0.886191	PTX3
GO:1900087_positive_regulation_of_G1/S_transition_of_mitotic_cell_cycle	45	2.22	6.12	0.154969	0.886191	ANXA1
GO:0014070_response_to_organic_cyclic_compound	46	2.17	5.98	0.158128	0.900708	SFRP1
GO:1905515_non-motile_cilium_assembly	46	2.17	5.98	0.158128	0.900708	IFT57
GO:0007157_heterophilic_cell-cell_adhesion_via_plasma_membrane_cell_adhesion_molecules	47	2.13	5.85	0.161275	0.911485	CDH2
GO:0030178_negative_regulation_of_Wnt_signaling_pathway	47	2.13	5.85	0.161275	0.911485	SFRP1
GO:0050766_positive_regulation_of_phagocytosis	47	2.13	5.85	0.161275	0.911485	PTX3
GO:0051781_positive_regulation_of_cell_division	47	2.13	5.85	0.161275	0.911485	TGFA
GO:0035556_intracellular_signal_transduction	372	0.81	2.21	0.162342	0.915736	TGFA;MELK;DNMBP
GO:0007254_JNK_cascade	48	2.08	5.73	0.16441	0.920254	TNFRSF19
GO:0021549_cerebellum_development	48	2.08	5.73	0.16441	0.920254	HAP1
GO:0030199_collagen_fibril_organization	48	2.08	5.73	0.16441	0.920254	COL11A1
GO:0043434_response_to_peptide_hormone	48	2.08	5.73	0.16441	0.920254	ANXA1
GO:0030155_regulation_of_cell_adhesion	49	2.04	5.61	0.167534	0.932349	LAMA4
GO:0030968_endoplasmic_reticulum_unfolded_protein_response	49	2.04	5.61	0.167534	0.932349	EIF2AK3
GO:0042149_cellular_response_to_glucose_starvation	49	2.04	5.61	0.167534	0.932349	EIF2AK3
GO:0007519_skeletal_muscle_tissue_development	50	2	5.49	0.170646	0.940659	MEF2C
GO:0010923_negative_regulation_of_phosphatase_activity	50	2	5.49	0.170646	0.940659	SYTL2
GO:0042981_regulation_of_apoptotic_process	199	1.01	2.74	0.17023	0.940659	IFT57;BRCA1
GO:0048167_regulation_of_synaptic_plasticity	50	2	5.49	0.170646	0.940659	MEF2C
GO:0048666_neuron_development	50	2	5.49	0.170646	0.940659	MEF2C
GO:0042542_response_to_hydrogen_peroxide	51	1.96	5.38	0.173747	0.954131	CRYAB
GO:0045599_negative_regulation_of_fat_cell_differentiation	51	1.96	5.38	0.173747	0.954131	ARNTL
GO:0051496_positive_regulation_of_stress_fiber_assembly	52	1.92	5.28	0.176836	0.967438	SFRP1
GO:0071320_cellular_response_to_cAMP	52	1.92	5.28	0.176836	0.967438	EZR
GO:0030097_hemopoiesis	53	1.89	5.18	0.179914	0.975094	MELK
GO:0030154_cell_differentiation	590	0.68	1.86	0.178919	0.975094	FST;ILDR2;MEF2C;SMAD7
GO:0030216_keratinocyte_differentiation	53	1.89	5.18	0.179914	0.975094	ANXA1
GO:0031295_T_cell_costimulation	53	1.89	5.18	0.179914	0.975094	CD274
GO:0045668_negative_regulation_of_osteoblast_differentiation	53	1.89	5.18	0.179914	0.975094	SFRP1
GO:0009612_response_to_mechanical_stimulus	54	1.85	5.08	0.182981	0.989867	TGFBR2
GO:0006006_glucose_metabolic_process	55	1.82	4.98	0.186036	0.99711	PGM2
GO:0031397_negative_regulation_of_protein_ubiquitination	55	1.82	4.98	0.186036	0.99711	SMAD7
GO:0045600_positive_regulation_of_fat_cell_differentiation	55	1.82	4.98	0.186036	0.99711	SFRP1
GO:0048015_phosphatidylinositol-mediated_signaling	55	1.82	4.98	0.186036	0.99711	EZR
GO:1903779_regulation_of_cardiac_conduction	55	1.82	4.98	0.186036	0.99711	ATP1B2
GO:0000002_mitochondrial_genome_maintenance	12	0	0	1	1
GO:0000012_single_strand_break_repair	9	0	0	1	1
GO:0000027_ribosomal_large_subunit_assembly	25	0	0	1	1
GO:0000028_ribosomal_small_subunit_assembly	16	0	0	1	1
GO:0000038_very_long-chain_fatty_acid_metabolic_process	16	0	0	1	1
GO:0000045_autophagosome_assembly	57	0	0	1	1
GO:0000050_urea_cycle	11	0	0	1	1
GO:0000070_mitotic_sister_chromatid_segregation	35	0	0	1	1
GO:0000079_regulation_of_cyclin-dependent_protein_serine/threonine_kinase_activity	55	0	0	1	1
GO:0000132_establishment_of_mitotic_spindle_orientation	30	0	0	1	1
GO:0000183_rDNA_heterochromatin_assembly	37	0	0	1	1
GO:0000184_nuclear-transcribed_mRNA_catabolic_process,_nonsense-mediated_decay	117	0	0	1	1
GO:0000185_activation_of_MAPKKK_activity	12	0	0	1	1
GO:0000186_activation_of_MAPKK_activity	42	0	0	1	1
GO:0000187_activation_of_MAPK_activity	123	0.81	2.2	0.369295	1	TGFA
GO:0000209_protein_polyubiquitination	270	0	0	1	1
GO:0000226_microtubule_cytoskeleton_organization	134	0.75	2.02	0.394827	1	WEE1
GO:0000244_spliceosomal_tri-snRNP_complex_assembly	27	0	0	1	1
GO:0000245_spliceosomal_complex_assembly	26	0	0	1	1
GO:0000266_mitochondrial_fission	19	0	0	1	1
GO:0000278_mitotic_cell_cycle	134	0.75	2.02	0.394827	1	CENPW
GO:0000281_mitotic_cytokinesis	52	0	0	1	1
GO:0000288_nuclear-transcribed_mRNA_catabolic_process,_deadenylation-dependent_decay	9	0	0	1	1
GO:0000289_nuclear-transcribed_mRNA_poly(A)_tail_shortening	22	0	0	1	1
GO:0000290_deadenylation-dependent_decapping_of_nuclear-transcribed_mRNA	10	0	0	1	1
GO:0000302_response_to_reactive_oxygen_species	13	0	0	1	1
GO:0000338_protein_deneddylation	10	0	0	1	1
GO:0000353_formation_of_quadruple_SL/U4/U5/U6_snRNP	12	0	0	1	1
GO:0000375_RNA_splicing,_via_transesterification_reactions	25	0	0	1	1
GO:0000380_alternative_mRNA_splicing,_via_spliceosome	18	0	0	1	1
GO:0000381_regulation_of_alternative_mRNA_splicing,_via_spliceosome	76	0	0	1	1
GO:0000387_spliceosomal_snRNP_assembly	28	0	0	1	1
GO:0000395_mRNA_5'-splice_site_recognition	25	0	0	1	1
GO:0000398_mRNA_splicing,_via_spliceosome	245	0	0	1	1
GO:0000413_protein_peptidyl-prolyl_isomerization	43	0	0	1	1
GO:0000422_autophagy_of_mitochondrion	37	0	0	1	1
GO:0000423_mitophagy	8	0	0	1	1
GO:0000460_maturation_of_5.8S_rRNA	13	0	0	1	1
GO:0000462_maturation_of_SSU-rRNA_from_tricistronic_rRNA_transcript_(SSU-rRNA,_5.8S_rRNA,_LSU-rRNA)	27	0	0	1	1
GO:0000463_maturation_of_LSU-rRNA_from_tricistronic_rRNA_transcript_(SSU-rRNA,_5.8S_rRNA,_LSU-rRNA)	14	0	0	1	1
GO:0000470_maturation_of_LSU-rRNA	13	0	0	1	1
GO:0000492_box_C/D_snoRNP_assembly	9	0	0	1	1
GO:0000712_resolution_of_meiotic_recombination_intermediates	18	0	0	1	1
GO:0000715_nucleotide-excision_repair,_DNA_damage_recognition	23	0	0	1	1
GO:0000717_nucleotide-excision_repair,_DNA_duplex_unwinding	22	0	0	1	1
GO:0000722_telomere_maintenance_via_recombination	9	0	0	1	1
GO:0000723_telomere_maintenance	44	0	0	1	1
GO:0000724_double-strand_break_repair_via_homologous_recombination	82	1.22	3.32	0.26438	1	BRCA1
GO:0000737_DNA_catabolic_process,_endonucleolytic	11	0	0	1	1
GO:0000902_cell_morphogenesis	81	1.23	3.36	0.261616	1	PDPN
GO:0000956_nuclear-transcribed_mRNA_catabolic_process	15	0	0	1	1
GO:0001504_neurotransmitter_uptake	12	0	0	1	1
GO:0001508_action_potential	18	0	0	1	1
GO:0001510_RNA_methylation	19	0	0	1	1
GO:0001516_prostaglandin_biosynthetic_process	16	0	0	1	1
GO:0001523_retinoid_metabolic_process	64	0	0	1	1
GO:0001525_angiogenesis	238	0.84	2.29	0.222919	1	HIF3A;EIF2AK3
GO:0001541_ovarian_follicle_development	40	0	0	1	1
GO:0001556_oocyte_maturation	20	0	0	1	1
GO:0001558_regulation_of_cell_growth	66	0	0	1	1
GO:0001561_fatty_acid_alpha-oxidation	9	0	0	1	1
GO:0001570_vasculogenesis	62	1.61	4.41	0.207107	1	TGFBR2
GO:0001574_ganglioside_biosynthetic_process	11	0	0	1	1
GO:0001578_microtubule_bundle_formation	31	0	0	1	1
GO:0001580_detection_of_chemical_stimulus_involved_in_sensory_perception_of_bitter_taste	36	0	0	1	1
GO:0001654_eye_development	42	0	0	1	1
GO:0001655_urogenital_system_development	12	0	0	1	1
GO:0001656_metanephros_development	29	0	0	1	1
GO:0001658_branching_involved_in_ureteric_bud_morphogenesis	42	0	0	1	1
GO:0001659_temperature_homeostasis	20	0	0	1	1
GO:0001662_behavioral_fear_response	31	0	0	1	1
GO:0001675_acrosome_assembly	18	0	0	1	1
GO:0001676_long-chain_fatty_acid_metabolic_process	22	0	0	1	1
GO:0001678_cellular_glucose_homeostasis	22	0	0	1	1
GO:0001682_tRNA_5'-leader_removal	13	0	0	1	1
GO:0001701_in_utero_embryonic_development	202	0.5	1.33	0.531434	1	TGFBR2
GO:0001702_gastrulation_with_mouth_forming_second	17	0	0	1	1
GO:0001706_endoderm_formation	12	0	0	1	1
GO:0001708_cell_fate_specification	34	0	0	1	1
GO:0001709_cell_fate_determination	17	0	0	1	1
GO:0001731_formation_of_translation_preinitiation_complex	10	0	0	1	1
GO:0001732_formation_of_cytoplasmic_translation_initiation_complex	16	0	0	1	1
GO:0001755_neural_crest_cell_migration	46	0	0	1	1
GO:0001764_neuron_migration	110	0.91	2.46	0.337743	1	MEF2C
GO:0001771_immunological_synapse_formation	11	0	0	1	1
GO:0001774_microglial_cell_activation	29	0	0	1	1
GO:0001778_plasma_membrane_repair	12	0	0	1	1
GO:0001779_natural_killer_cell_differentiation	12	0	0	1	1
GO:0001817_regulation_of_cytokine_production	33	0	0	1	1
GO:0001818_negative_regulation_of_cytokine_production	15	0	0	1	1
GO:0001819_positive_regulation_of_cytokine_production	26	0	0	1	1
GO:0001822_kidney_development	95	0	0	1	1
GO:0001823_mesonephros_development	11	0	0	1	1
GO:0001824_blastocyst_development	19	0	0	1	1
GO:0001825_blastocyst_formation	18	0	0	1	1
GO:0001829_trophectodermal_cell_differentiation	13	0	0	1	1
GO:0001835_blastocyst_hatching	29	0	0	1	1
GO:0001836_release_of_cytochrome_c_from_mitochondria	22	0	0	1	1
GO:0001867_complement_activation,_lectin_pathway	10	0	0	1	1
GO:0001881_receptor_recycling	11	0	0	1	1
GO:0001886_endothelial_cell_morphogenesis	14	0	0	1	1
GO:0001889_liver_development	76	0	0	1	1
GO:0001890_placenta_development	37	0	0	1	1
GO:0001892_embryonic_placenta_development	19	0	0	1	1
GO:0001893_maternal_placenta_development	11	0	0	1	1
GO:0001894_tissue_homeostasis	21	0	0	1	1
GO:0001916_positive_regulation_of_T_cell_mediated_cytotoxicity	24	0	0	1	1
GO:0001921_positive_regulation_of_receptor_recycling	14	0	0	1	1
GO:0001932_regulation_of_protein_phosphorylation	44	0	0	1	1
GO:0001933_negative_regulation_of_protein_phosphorylation	72	1.39	3.79	0.236275	1	PRR5L
GO:0001934_positive_regulation_of_protein_phosphorylation	185	0.54	1.46	0.500455	1	PRR5L
GO:0001935_endothelial_cell_proliferation	15	0	0	1	1
GO:0001937_negative_regulation_of_endothelial_cell_proliferation	38	0	0	1	1
GO:0001938_positive_regulation_of_endothelial_cell_proliferation	73	0	0	1	1
GO:0001944_vasculature_development	16	0	0	1	1
GO:0001952_regulation_of_cell-matrix_adhesion	12	0	0	1	1
GO:0001953_negative_regulation_of_cell-matrix_adhesion	22	0	0	1	1
GO:0001960_negative_regulation_of_cytokine-mediated_signaling_pathway	13	0	0	1	1
GO:0001961_positive_regulation_of_cytokine-mediated_signaling_pathway	10	0	0	1	1
GO:0001963_synaptic_transmission,_dopaminergic	11	0	0	1	1
GO:0001967_suckling_behavior	13	0	0	1	1
GO:0002003_angiotensin_maturation	12	0	0	1	1
GO:0002009_morphogenesis_of_an_epithelium	18	0	0	1	1
GO:0002024_diet_induced_thermogenesis	12	0	0	1	1
GO:0002026_regulation_of_the_force_of_heart_contraction	17	0	0	1	1
GO:0002027_regulation_of_heart_rate	32	0	0	1	1
GO:0002028_regulation_of_sodium_ion_transport	18	0	0	1	1
GO:0002031_G_protein-coupled_receptor_internalization	13	0	0	1	1
GO:0002042_cell_migration_involved_in_sprouting_angiogenesis	21	0	0	1	1
GO:0002052_positive_regulation_of_neuroblast_proliferation	23	0	0	1	1
GO:0002064_epithelial_cell_development	12	0	0	1	1
GO:0002076_osteoblast_development	19	0	0	1	1
GO:0002082_regulation_of_oxidative_phosphorylation	11	0	0	1	1
GO:0002084_protein_depalmitoylation	9	0	0	1	1
GO:0002087_regulation_of_respiratory_gaseous_exchange_by_nervous_system_process	13	0	0	1	1
GO:0002089_lens_morphogenesis_in_camera-type_eye	12	0	0	1	1
GO:0002091_negative_regulation_of_receptor_internalization	13	0	0	1	1
GO:0002092_positive_regulation_of_receptor_internalization	23	0	0	1	1
GO:0002098_tRNA_wobble_uridine_modification	15	0	0	1	1
GO:0002181_cytoplasmic_translation	41	0	0	1	1
GO:0002218_activation_of_innate_immune_response	26	0	0	1	1
GO:0002223_stimulatory_C-type_lectin_receptor_signaling_pathway	112	0	0	1	1
GO:0002224_toll-like_receptor_signaling_pathway	44	0	0	1	1
GO:0002227_innate_immune_response_in_mucosa	26	0	0	1	1
GO:0002230_positive_regulation_of_defense_response_to_virus_by_host	29	0	0	1	1
GO:0002281_macrophage_activation_involved_in_immune_response	11	0	0	1	1
GO:0002286_T_cell_activation_involved_in_immune_response	24	0	0	1	1
GO:0002323_natural_killer_cell_activation_involved_in_immune_response	19	0	0	1	1
GO:0002376_immune_system_process	36	0	0	1	1
GO:0002377_immunoglobulin_production	14	0	0	1	1
GO:0002407_dendritic_cell_chemotaxis	17	0	0	1	1
GO:0002430_complement_receptor_mediated_signaling_pathway	12	0	0	1	1
GO:0002437_inflammatory_response_to_antigenic_stimulus	23	0	0	1	1
GO:0002474_antigen_processing_and_presentation_of_peptide_antigen_via_MHC_class_I	27	0	0	1	1
GO:0002479_antigen_processing_and_presentation_of_exogenous_peptide_antigen_via_MHC_class_I,_TAP-dependent	75	0	0	1	1
GO:0002523_leukocyte_migration_involved_in_inflammatory_response	11	0	0	1	1
GO:0002526_acute_inflammatory_response	13	0	0	1	1
GO:0002576_platelet_degranulation	124	0	0	1	1
GO:0002675_positive_regulation_of_acute_inflammatory_response	13	0	0	1	1
GO:0002687_positive_regulation_of_leukocyte_migration	11	0	0	1	1
GO:0002690_positive_regulation_of_leukocyte_chemotaxis	13	0	0	1	1
GO:0002755_MyD88-dependent_toll-like_receptor_signaling_pathway	32	0	0	1	1
GO:0002756_MyD88-independent_toll-like_receptor_signaling_pathway	20	0	0	1	1
GO:0002827_positive_regulation_of_T-helper_1_type_immune_response	9	0	0	1	1
GO:0002862_negative_regulation_of_inflammatory_response_to_antigenic_stimulus	13	0	0	1	1
GO:0002931_response_to_ischemia	55	0	0	1	1
GO:0003007_heart_morphogenesis	39	0	0	1	1
GO:0003009_skeletal_muscle_contraction	26	0	0	1	1
GO:0003016_respiratory_system_process	14	0	0	1	1
GO:0003073_regulation_of_systemic_arterial_blood_pressure	12	0	0	1	1
GO:0003085_negative_regulation_of_systemic_arterial_blood_pressure	13	0	0	1	1
GO:0003091_renal_water_homeostasis	34	0	0	1	1
GO:0003094_glomerular_filtration	10	0	0	1	1
GO:0003180_aortic_valve_morphogenesis	28	0	0	1	1
GO:0003184_pulmonary_valve_morphogenesis	15	0	0	1	1
GO:0003198_epithelial_to_mesenchymal_transition_involved_in_endocardial_cushion_formation	12	0	0	1	1
GO:0003203_endocardial_cushion_morphogenesis	18	0	0	1	1
GO:0003215_cardiac_right_ventricle_morphogenesis	13	0	0	1	1
GO:0003222_ventricular_trabecula_myocardium_morphogenesis	16	0	0	1	1
GO:0003279_cardiac_septum_development	11	0	0	1	1
GO:0003281_ventricular_septum_development	33	0	0	1	1
GO:0003323_type_B_pancreatic_cell_development	12	0	0	1	1
GO:0003341_cilium_movement	40	0	0	1	1
GO:0003351_epithelial_cilium_movement_involved_in_extracellular_fluid_movement	17	0	0	1	1
GO:0003407_neural_retina_development	14	0	0	1	1
GO:0005513_detection_of_calcium_ion	13	0	0	1	1
GO:0005975_carbohydrate_metabolic_process	124	0	0	1	1
GO:0005977_glycogen_metabolic_process	27	0	0	1	1
GO:0005979_regulation_of_glycogen_biosynthetic_process	12	0	0	1	1
GO:0006002_fructose_6-phosphate_metabolic_process	12	0	0	1	1
GO:0006004_fucose_metabolic_process	7	0	0	1	1
GO:0006024_glycosaminoglycan_biosynthetic_process	38	0	0	1	1
GO:0006027_glycosaminoglycan_catabolic_process	25	0	0	1	1
GO:0006044_N-acetylglucosamine_metabolic_process	14	0	0	1	1
GO:0006068_ethanol_catabolic_process	13	0	0	1	1
GO:0006071_glycerol_metabolic_process	13	0	0	1	1
GO:0006082_organic_acid_metabolic_process	20	0	0	1	1
GO:0006090_pyruvate_metabolic_process	23	0	0	1	1
GO:0006091_generation_of_precursor_metabolites_and_energy	48	0	0	1	1
GO:0006094_gluconeogenesis	45	0	0	1	1
GO:0006096_glycolytic_process	33	0	0	1	1
GO:0006099_tricarboxylic_acid_cycle	34	0	0	1	1
GO:0006103_2-oxoglutarate_metabolic_process	16	0	0	1	1
GO:0006108_malate_metabolic_process	8	0	0	1	1
GO:0006110_regulation_of_glycolytic_process	42	0	0	1	1
GO:0006111_regulation_of_gluconeogenesis	14	0	0	1	1
GO:0006112_energy_reserve_metabolic_process	15	0	0	1	1
GO:0006119_oxidative_phosphorylation	17	0	0	1	1
GO:0006120_mitochondrial_electron_transport,_NADH_to_ubiquinone	49	0	0	1	1
GO:0006122_mitochondrial_electron_transport,_ubiquinol_to_cytochrome_c	14	0	0	1	1
GO:0006123_mitochondrial_electron_transport,_cytochrome_c_to_oxygen	20	0	0	1	1
GO:0006139_nucleobase-containing_compound_metabolic_process	31	0	0	1	1
GO:0006164_purine_nucleotide_biosynthetic_process	11	0	0	1	1
GO:0006165_nucleoside_diphosphate_phosphorylation	16	0	0	1	1
GO:0006171_cAMP_biosynthetic_process	10	0	0	1	1
GO:0006182_cGMP_biosynthetic_process	11	0	0	1	1
GO:0006183_GTP_biosynthetic_process	10	0	0	1	1
GO:0006241_CTP_biosynthetic_process	10	0	0	1	1
GO:0006261_DNA-dependent_DNA_replication	22	0	0	1	1
GO:0006264_mitochondrial_DNA_replication	9	0	0	1	1
GO:0006265_DNA_topological_change	9	0	0	1	1
GO:0006275_regulation_of_DNA_replication	22	0	0	1	1
GO:0006281_DNA_repair	223	0.9	2.44	0.202443	1	CLSPN;POLA1
GO:0006283_transcription-coupled_nucleotide-excision_repair	73	0	0	1	1
GO:0006293_nucleotide-excision_repair,_preincision_complex_stabilization	21	0	0	1	1
GO:0006294_nucleotide-excision_repair,_preincision_complex_assembly	29	0	0	1	1
GO:0006295_nucleotide-excision_repair,_DNA_incision,_3'-to_lesion	21	0	0	1	1
GO:0006296_nucleotide-excision_repair,_DNA_incision,_5'-to_lesion	37	0	0	1	1
GO:0006297_nucleotide-excision_repair,_DNA_gap_filling	23	0	0	1	1
GO:0006298_mismatch_repair	28	0	0	1	1
GO:0006302_double-strand_break_repair	61	1.64	4.48	0.20413	1	BRCA1
GO:0006306_DNA_methylation	23	0	0	1	1
GO:0006307_DNA_dealkylation_involved_in_DNA_repair	10	0	0	1	1
GO:0006309_apoptotic_DNA_fragmentation	16	0	0	1	1
GO:0006310_DNA_recombination	60	0	0	1	1
GO:0006325_chromatin_organization	153	0	0	1	1
GO:0006334_nucleosome_assembly	110	0	0	1	1
GO:0006335_DNA_replication-dependent_nucleosome_assembly	32	0	0	1	1
GO:0006336_DNA_replication-independent_nucleosome_assembly	26	0	0	1	1
GO:0006337_nucleosome_disassembly	18	0	0	1	1
GO:0006338_chromatin_remodeling	99	0	0	1	1
GO:0006342_chromatin_silencing	47	0	0	1	1
GO:0006351_transcription,_DNA-templated	88	0	0	1	1
GO:0006352_DNA-templated_transcription,_initiation	31	0	0	1	1
GO:0006355_regulation_of_transcription,_DNA-templated	757	0.26	0.7	0.778066	1	ARNTL;MEF2C
GO:0006357_regulation_of_transcription_by_RNA_polymerase_II	1291	0.46	1.26	0.351177	1	TGFA;GRHL3;HR;HIF3A;NPAS1;BRCA1
GO:0006361_transcription_initiation_from_RNA_polymerase_I_promoter	33	0	0	1	1
GO:0006362_transcription_elongation_from_RNA_polymerase_I_promoter	29	0	0	1	1
GO:0006363_termination_of_RNA_polymerase_I_transcription	30	0	0	1	1
GO:0006364_rRNA_processing	143	0	0	1	1
GO:0006366_transcription_by_RNA_polymerase_II	188	0.53	1.43	0.506065	1	HIF3A
GO:0006367_transcription_initiation_from_RNA_polymerase_II_promoter	160	0	0	1	1
GO:0006368_transcription_elongation_from_RNA_polymerase_II_promoter	74	0	0	1	1
GO:0006369_termination_of_RNA_polymerase_II_transcription	34	0	0	1	1
GO:0006370_7-methylguanosine_mRNA_capping	33	0	0	1	1
GO:0006376_mRNA_splice_site_selection	21	0	0	1	1
GO:0006378_mRNA_polyadenylation	30	0	0	1	1
GO:0006382_adenosine_to_inosine_editing	7	0	0	1	1
GO:0006383_transcription_by_RNA_polymerase_III	23	0	0	1	1
GO:0006388_tRNA_splicing,_via_endonucleolytic_cleavage_and_ligation	15	0	0	1	1
GO:0006390_mitochondrial_transcription	10	0	0	1	1
GO:0006396_RNA_processing	491	0	0	1	1
GO:0006397_mRNA_processing	159	0	0	1	1
GO:0006400_tRNA_modification	32	0	0	1	1
GO:0006401_RNA_catabolic_process	22	0	0	1	1
GO:0006402_mRNA_catabolic_process	28	0	0	1	1
GO:0006405_RNA_export_from_nucleus	56	0	0	1	1
GO:0006406_mRNA_export_from_nucleus	101	0	0	1	1
GO:0006409_tRNA_export_from_nucleus	34	0	0	1	1
GO:0006412_translation	176	0	0	1	1
GO:0006413_translational_initiation	130	0	0	1	1
GO:0006414_translational_elongation	20	0	0	1	1
GO:0006417_regulation_of_translation	61	1.64	4.48	0.20413	1	DNAJC1
GO:0006418_tRNA_aminoacylation_for_protein_translation	38	0	0	1	1
GO:0006446_regulation_of_translational_initiation	28	0	0	1	1
GO:0006464_cellular_protein_modification_process	81	1.23	3.36	0.261616	1	PLAT
GO:0006465_signal_peptide_processing	11	0	0	1	1
GO:0006468_protein_phosphorylation	439	0.68	1.86	0.225595	1	MELK;TGFBR2;EIF2AK3
GO:0006469_negative_regulation_of_protein_kinase_activity	76	0	0	1	1
GO:0006471_protein_ADP-ribosylation	23	0	0	1	1
GO:0006473_protein_acetylation	15	0	0	1	1
GO:0006474_N-terminal_protein_amino_acid_acetylation	9	0	0	1	1
GO:0006476_protein_deacetylation	14	0	0	1	1
GO:0006479_protein_methylation	28	0	0	1	1
GO:0006486_protein_glycosylation	89	0	0	1	1
GO:0006487_protein_N-linked_glycosylation	45	0	0	1	1
GO:0006488_dolichol-linked_oligosaccharide_biosynthetic_process	15	0	0	1	1
GO:0006491_N-glycan_processing	17	0	0	1	1
GO:0006493_protein_O-linked_glycosylation	36	0	0	1	1
GO:0006497_protein_lipidation	11	0	0	1	1
GO:0006506_GPI_anchor_biosynthetic_process	25	0	0	1	1
GO:0006508_proteolysis	428	0.47	1.26	0.476071	1	PLAT;SFRP1
GO:0006509_membrane_protein_ectodomain_proteolysis	20	0	0	1	1
GO:0006511_ubiquitin-dependent_protein_catabolic_process	293	0.34	0.91	0.667619	1	RNF128
GO:0006513_protein_monoubiquitination	34	0	0	1	1
GO:0006515_protein_quality_control_for_misfolded_or_incompletely_synthesized_proteins	13	0	0	1	1
GO:0006516_glycoprotein_catabolic_process	12	0	0	1	1
GO:0006517_protein_deglycosylation	8	0	0	1	1
GO:0006518_peptide_metabolic_process	13	0	0	1	1
GO:0006520_cellular_amino_acid_metabolic_process	19	0	0	1	1
GO:0006521_regulation_of_cellular_amino_acid_metabolic_process	51	0	0	1	1
GO:0006536_glutamate_metabolic_process	14	0	0	1	1
GO:0006541_glutamine_metabolic_process	18	0	0	1	1
GO:0006548_histidine_catabolic_process	8	0	0	1	1
GO:0006552_leucine_catabolic_process	6	0	0	1	1
GO:0006554_lysine_catabolic_process	12	0	0	1	1
GO:0006556_S-adenosylmethionine_biosynthetic_process	4	0	0	1	1
GO:0006559_L-phenylalanine_catabolic_process	11	0	0	1	1
GO:0006564_L-serine_biosynthetic_process	7	0	0	1	1
GO:0006590_thyroid_hormone_generation	17	0	0	1	1
GO:0006607_NLS-bearing_protein_import_into_nucleus	20	0	0	1	1
GO:0006611_protein_export_from_nucleus	28	0	0	1	1
GO:0006612_protein_targeting_to_membrane	53	0	0	1	1
GO:0006614_SRP-dependent_cotranslational_protein_targeting_to_membrane	89	0	0	1	1
GO:0006617_SRP-dependent_cotranslational_protein_targeting_to_membrane,_signal_sequence_recognition	10	0	0	1	1
GO:0006622_protein_targeting_to_lysosome	18	0	0	1	1
GO:0006623_protein_targeting_to_vacuole	16	0	0	1	1
GO:0006625_protein_targeting_to_peroxisome	65	0	0	1	1
GO:0006626_protein_targeting_to_mitochondrion	30	0	0	1	1
GO:0006629_lipid_metabolic_process	141	0	0	1	1
GO:0006631_fatty_acid_metabolic_process	65	0	0	1	1
GO:0006635_fatty_acid_beta-oxidation	44	0	0	1	1
GO:0006636_unsaturated_fatty_acid_biosynthetic_process	14	0	0	1	1
GO:0006637_acyl-CoA_metabolic_process	31	0	0	1	1
GO:0006641_triglyceride_metabolic_process	32	0	0	1	1
GO:0006644_phospholipid_metabolic_process	57	0	0	1	1
GO:0006646_phosphatidylethanolamine_biosynthetic_process	15	0	0	1	1
GO:0006654_phosphatidic_acid_biosynthetic_process	48	0	0	1	1
GO:0006656_phosphatidylcholine_biosynthetic_process	34	0	0	1	1
GO:0006661_phosphatidylinositol_biosynthetic_process	77	1.3	3.54	0.250458	1	SYNJ2
GO:0006665_sphingolipid_metabolic_process	25	0	0	1	1
GO:0006672_ceramide_metabolic_process	21	0	0	1	1
GO:0006687_glycosphingolipid_metabolic_process	40	0	0	1	1
GO:0006690_icosanoid_metabolic_process	9	0	0	1	1
GO:0006691_leukotriene_metabolic_process	17	0	0	1	1
GO:0006693_prostaglandin_metabolic_process	20	0	0	1	1
GO:0006694_steroid_biosynthetic_process	26	0	0	1	1
GO:0006695_cholesterol_biosynthetic_process	40	0	0	1	1
GO:0006699_bile_acid_biosynthetic_process	27	0	0	1	1
GO:0006700_C21-steroid_hormone_biosynthetic_process	12	0	0	1	1
GO:0006703_estrogen_biosynthetic_process	13	0	0	1	1
GO:0006704_glucocorticoid_biosynthetic_process	10	0	0	1	1
GO:0006707_cholesterol_catabolic_process	11	0	0	1	1
GO:0006729_tetrahydrobiopterin_biosynthetic_process	7	0	0	1	1
GO:0006730_one-carbon_metabolic_process	36	0	0	1	1
GO:0006744_ubiquinone_biosynthetic_process	16	0	0	1	1
GO:0006749_glutathione_metabolic_process	33	0	0	1	1
GO:0006750_glutathione_biosynthetic_process	15	0	0	1	1
GO:0006751_glutathione_catabolic_process	11	0	0	1	1
GO:0006754_ATP_biosynthetic_process	28	0	0	1	1
GO:0006768_biotin_metabolic_process	9	0	0	1	1
GO:0006783_heme_biosynthetic_process	22	0	0	1	1
GO:0006790_sulfur_compound_metabolic_process	15	0	0	1	1
GO:0006796_phosphate-containing_compound_metabolic_process	17	0	0	1	1
GO:0006801_superoxide_metabolic_process	20	0	0	1	1
GO:0006805_xenobiotic_metabolic_process	94	0	0	1	1
GO:0006809_nitric_oxide_biosynthetic_process	13	0	0	1	1
GO:0006810_transport	36	0	0	1	1
GO:0006811_ion_transport	98	1.02	2.77	0.307234	1	SLC20A2
GO:0006812_cation_transport	29	0	0	1	1
GO:0006813_potassium_ion_transport	68	0	0	1	1
GO:0006814_sodium_ion_transport	77	0	0	1	1
GO:0006816_calcium_ion_transport	76	0	0	1	1
GO:0006820_anion_transport	18	0	0	1	1
GO:0006821_chloride_transport	37	0	0	1	1
GO:0006825_copper_ion_transport	15	0	0	1	1
GO:0006826_iron_ion_transport	19	0	0	1	1
GO:0006828_manganese_ion_transport	11	0	0	1	1
GO:0006833_water_transport	16	0	0	1	1
GO:0006836_neurotransmitter_transport	28	0	0	1	1
GO:0006839_mitochondrial_transport	18	0	0	1	1
GO:0006851_mitochondrial_calcium_ion_transmembrane_transport	23	0	0	1	1
GO:0006853_carnitine_shuttle	11	0	0	1	1
GO:0006865_amino_acid_transport	40	0	0	1	1
GO:0006868_glutamine_transport	8	0	0	1	1
GO:0006869_lipid_transport	60	0	0	1	1
GO:0006874_cellular_calcium_ion_homeostasis	98	1.02	2.77	0.307234	1	CALCB
GO:0006878_cellular_copper_ion_homeostasis	14	0	0	1	1
GO:0006879_cellular_iron_ion_homeostasis	61	0	0	1	1
GO:0006882_cellular_zinc_ion_homeostasis	30	0	0	1	1
GO:0006884_cell_volume_homeostasis	19	0	0	1	1
GO:0006885_regulation_of_pH	12	0	0	1	1
GO:0006886_intracellular_protein_transport	277	0.72	1.96	0.276713	1	SYTL2;RAB31
GO:0006888_endoplasmic_reticulum_to_Golgi_vesicle-mediated_transport	183	0.55	1.47	0.496679	1	TGFA
GO:0006890_retrograde_vesicle-mediated_transport,_Golgi_to_endoplasmic_reticulum	85	0	0	1	1
GO:0006891_intra-Golgi_vesicle-mediated_transport	32	0	0	1	1
GO:0006892_post-Golgi_vesicle-mediated_transport	19	0	0	1	1
GO:0006893_Golgi_to_plasma_membrane_transport	23	0	0	1	1
GO:0006895_Golgi_to_endosome_transport	15	0	0	1	1
GO:0006897_endocytosis	185	0	0	1	1
GO:0006898_receptor-mediated_endocytosis	100	1	2.71	0.312414	1	TGFBR2
GO:0006900_vesicle_budding_from_membrane	15	0	0	1	1
GO:0006906_vesicle_fusion	37	0	0	1	1
GO:0006909_phagocytosis	60	1.67	4.56	0.201142	1	ANXA1
GO:0006910_phagocytosis,_recognition	9	0	0	1	1
GO:0006911_phagocytosis,_engulfment	26	0	0	1	1
GO:0006913_nucleocytoplasmic_transport	20	0	0	1	1
GO:0006935_chemotaxis	124	0	0	1	1
GO:0006937_regulation_of_muscle_contraction	14	0	0	1	1
GO:0006939_smooth_muscle_contraction	16	0	0	1	1
GO:0006940_regulation_of_smooth_muscle_contraction	14	0	0	1	1
GO:0006941_striated_muscle_contraction	14	0	0	1	1
GO:0006952_defense_response	73	0	0	1	1
GO:0006953_acute-phase_response	37	0	0	1	1
GO:0006956_complement_activation	28	0	0	1	1
GO:0006957_complement_activation,_alternative_pathway	13	0	0	1	1
GO:0006958_complement_activation,_classical_pathway	34	0	0	1	1
GO:0006959_humoral_immune_response	59	1.69	4.64	0.198143	1	MEF2C
GO:0006968_cellular_defense_response	52	0	0	1	1
GO:0006970_response_to_osmotic_stress	19	0	0	1	1
GO:0006974_cellular_response_to_DNA_damage_stimulus	239	0.84	2.28	0.224291	1	MCM10;BRCA1
GO:0006977_DNA_damage_response,_signal_transduction_by_p53_class_mediator_resulting_in_cell_cycle_arrest	56	0	0	1	1
GO:0006986_response_to_unfolded_protein	53	0	0	1	1
GO:0006995_cellular_response_to_nitrogen_starvation	12	0	0	1	1
GO:0006996_organelle_organization	11	0	0	1	1
GO:0006997_nucleus_organization	23	0	0	1	1
GO:0006998_nuclear_envelope_organization	18	0	0	1	1
GO:0007004_telomere_maintenance_via_telomerase	20	0	0	1	1
GO:0007005_mitochondrion_organization	90	0	0	1	1
GO:0007007_inner_mitochondrial_membrane_organization	18	0	0	1	1
GO:0007009_plasma_membrane_organization	23	0	0	1	1
GO:0007010_cytoskeleton_organization	140	0.71	1.93	0.40832	1	PALLD
GO:0007017_microtubule-based_process	33	0	0	1	1
GO:0007018_microtubule-based_movement	79	0	0	1	1
GO:0007019_microtubule_depolymerization	15	0	0	1	1
GO:0007020_microtubule_nucleation	18	0	0	1	1
GO:0007026_negative_regulation_of_microtubule_depolymerization	27	0	0	1	1
GO:0007030_Golgi_organization	118	0	0	1	1
GO:0007031_peroxisome_organization	20	0	0	1	1
GO:0007032_endosome_organization	38	0	0	1	1
GO:0007035_vacuolar_acidification	14	0	0	1	1
GO:0007040_lysosome_organization	42	0	0	1	1
GO:0007041_lysosomal_transport	20	0	0	1	1
GO:0007043_cell-cell_junction_assembly	37	0	0	1	1
GO:0007049_cell_cycle	245	0	0	1	1
GO:0007050_cell_cycle_arrest	129	0	0	1	1
GO:0007051_spindle_organization	16	0	0	1	1
GO:0007052_mitotic_spindle_organization	50	0	0	1	1
GO:0007062_sister_chromatid_cohesion	23	0	0	1	1
GO:0007064_mitotic_sister_chromatid_cohesion	13	0	0	1	1
GO:0007076_mitotic_chromosome_condensation	16	0	0	1	1
GO:0007077_mitotic_nuclear_envelope_disassembly	12	0	0	1	1
GO:0007080_mitotic_metaphase_plate_congression	37	0	0	1	1
GO:0007084_mitotic_nuclear_envelope_reassembly	10	0	0	1	1
GO:0007088_regulation_of_mitotic_nuclear_division	23	0	0	1	1
GO:0007094_mitotic_spindle_assembly_checkpoint	22	0	0	1	1
GO:0007096_regulation_of_exit_from_mitosis	12	0	0	1	1
GO:0007097_nuclear_migration	15	0	0	1	1
GO:0007099_centriole_replication	17	0	0	1	1
GO:0007129_homologous_chromosome_pairing_at_meiosis	26	0	0	1	1
GO:0007130_synaptonemal_complex_assembly	21	0	0	1	1
GO:0007131_reciprocal_meiotic_recombination	30	0	0	1	1
GO:0007140_male_meiotic_nuclear_division	24	0	0	1	1
GO:0007141_male_meiosis_I	24	0	0	1	1
GO:0007154_cell_communication	18	0	0	1	1
GO:0007158_neuron_cell-cell_adhesion	17	0	0	1	1
GO:0007160_cell-matrix_adhesion	93	0	0	1	1
GO:0007162_negative_regulation_of_cell_adhesion	50	0	0	1	1
GO:0007163_establishment_or_maintenance_of_cell_polarity	49	0	0	1	1
GO:0007166_cell_surface_receptor_signaling_pathway	232	0.86	2.35	0.214705	1	ANXA1;CD274
GO:0007168_receptor_guanylyl_cyclase_signaling_pathway	10	0	0	1	1
GO:0007169_transmembrane_receptor_protein_tyrosine_kinase_signaling_pathway	122	0	0	1	1
GO:0007171_activation_of_transmembrane_receptor_protein_tyrosine_kinase_activity	13	0	0	1	1
GO:0007175_negative_regulation_of_epidermal_growth_factor-activated_receptor_activity	14	0	0	1	1
GO:0007186_G_protein-coupled_receptor_signaling_pathway	1097	0.36	0.98	0.589376	1	S1PR3;RGS4;ANXA1;CALCB
GO:0007187_G_protein-coupled_receptor_signaling_pathway,_coupled_to_cyclic_nucleotide_second_messenger	63	1.59	4.34	0.210073	1	ANXA1
GO:0007188_adenylate_cyclase-modulating_G_protein-coupled_receptor_signaling_pathway	50	0	0	1	1
GO:0007190_activation_of_adenylate_cyclase_activity	39	0	0	1	1
GO:0007191_adenylate_cyclase-activating_dopamine_receptor_signaling_pathway	11	0	0	1	1
GO:0007193_adenylate_cyclase-inhibiting_G_protein-coupled_receptor_signaling_pathway	60	1.67	4.56	0.201142	1	S1PR3
GO:0007194_negative_regulation_of_adenylate_cyclase_activity	20	0	0	1	1
GO:0007200_phospholipase_C-activating_G_protein-coupled_receptor_signaling_pathway	60	0	0	1	1
GO:0007202_activation_of_phospholipase_C_activity	34	0	0	1	1
GO:0007204_positive_regulation_of_cytosolic_calcium_ion_concentration	151	0.66	1.79	0.432287	1	S1PR3
GO:0007205_protein_kinase_C-activating_G_protein-coupled_receptor_signaling_pathway	28	0	0	1	1
GO:0007212_dopamine_receptor_signaling_pathway	18	0	0	1	1
GO:0007213_G_protein-coupled_acetylcholine_receptor_signaling_pathway	15	0	0	1	1
GO:0007214_gamma-aminobutyric_acid_signaling_pathway	27	0	0	1	1
GO:0007215_glutamate_receptor_signaling_pathway	16	0	0	1	1
GO:0007216_G_protein-coupled_glutamate_receptor_signaling_pathway	15	0	0	1	1
GO:0007218_neuropeptide_signaling_pathway	105	0	0	1	1
GO:0007220_Notch_receptor_processing	9	0	0	1	1
GO:0007221_positive_regulation_of_transcription_of_Notch_receptor_target	18	0	0	1	1
GO:0007229_integrin-mediated_signaling_pathway	95	0	0	1	1
GO:0007249_I-kappaB_kinase/NF-kappaB_signaling	66	0	0	1	1
GO:0007250_activation_of_NF-kappaB-inducing_kinase_activity	17	0	0	1	1
GO:0007252_I-kappaB_phosphorylation	12	0	0	1	1
GO:0007256_activation_of_JNKK_activity	11	0	0	1	1
GO:0007257_activation_of_JUN_kinase_activity	40	0	0	1	1
GO:0007259_receptor_signaling_pathway_via_JAK-STAT	31	0	0	1	1
GO:0007260_tyrosine_phosphorylation_of_STAT_protein	9	0	0	1	1
GO:0007263_nitric_oxide_mediated_signal_transduction	19	0	0	1	1
GO:0007264_small_GTPase_mediated_signal_transduction	94	0	0	1	1
GO:0007265_Ras_protein_signal_transduction	73	0	0	1	1
GO:0007266_Rho_protein_signal_transduction	57	1.75	4.8	0.192112	1	PDPN
GO:0007267_cell-cell_signaling	228	0	0	1	1
GO:0007268_chemical_synaptic_transmission	246	0.41	1.09	0.603059	1	HAP1
GO:0007269_neurotransmitter_secretion	51	0	0	1	1
GO:0007271_synaptic_transmission,_cholinergic	25	0	0	1	1
GO:0007274_neuromuscular_synaptic_transmission	19	0	0	1	1
GO:0007275_multicellular_organism_development	469	0.21	0.57	0.829495	1	FST
GO:0007281_germ_cell_development	35	0	0	1	1
GO:0007283_spermatogenesis	414	0.24	0.64	0.789846	1	ARNTL
GO:0007286_spermatid_development	84	0	0	1	1
GO:0007288_sperm_axoneme_assembly	16	0	0	1	1
GO:0007292_female_gamete_generation	19	0	0	1	1
GO:0007338_single_fertilization	65	0	0	1	1
GO:0007339_binding_of_sperm_to_zona_pellucida	41	0	0	1	1
GO:0007340_acrosome_reaction	17	0	0	1	1
GO:0007342_fusion_of_sperm_to_egg_plasma_membrane_involved_in_single_fertilization	21	0	0	1	1
GO:0007346_regulation_of_mitotic_cell_cycle	44	0	0	1	1
GO:0007368_determination_of_left/right_symmetry	59	0	0	1	1
GO:0007399_nervous_system_development	303	0.33	0.88	0.679951	1	MEF2C
GO:0007405_neuroblast_proliferation	16	0	0	1	1
GO:0007409_axonogenesis	78	0	0	1	1
GO:0007411_axon_guidance	223	0.9	2.44	0.202443	1	EZR;PALLD
GO:0007413_axonal_fasciculation	20	0	0	1	1
GO:0007416_synapse_assembly	63	1.59	4.34	0.210073	1	CDH2
GO:0007422_peripheral_nervous_system_development	26	0	0	1	1
GO:0007492_endoderm_development	20	0	0	1	1
GO:0007512_adult_heart_development	14	0	0	1	1
GO:0007520_myoblast_fusion	22	0	0	1	1
GO:0007528_neuromuscular_junction_development	32	0	0	1	1
GO:0007548_sex_differentiation	20	0	0	1	1
GO:0007565_female_pregnancy	85	0	0	1	1
GO:0007569_cell_aging	25	0	0	1	1
GO:0007585_respiratory_gaseous_exchange_by_respiratory_system	30	0	0	1	1
GO:0007586_digestion	30	0	0	1	1
GO:0007588_excretion	32	0	0	1	1
GO:0007595_lactation	46	0	0	1	1
GO:0007596_blood_coagulation	186	0.54	1.45	0.502332	1	PLAT
GO:0007597_blood_coagulation,_intrinsic_pathway	17	0	0	1	1
GO:0007600_sensory_perception	11	0	0	1	1
GO:0007601_visual_perception	206	0.49	1.31	0.538442	1	COL11A1
GO:0007602_phototransduction	27	0	0	1	1
GO:0007608_sensory_perception_of_smell	99	0	0	1	1
GO:0007611_learning_or_memory	61	1.64	4.48	0.20413	1	MEF2C
GO:0007612_learning	61	0	0	1	1
GO:0007613_memory	83	0	0	1	1
GO:0007614_short-term_memory	11	0	0	1	1
GO:0007616_long-term_memory	34	0	0	1	1
GO:0007623_circadian_rhythm	74	1.35	3.68	0.24198	1	ARNTL
GO:0007625_grooming_behavior	14	0	0	1	1
GO:0007626_locomotory_behavior	86	0	0	1	1
GO:0007628_adult_walking_behavior	27	0	0	1	1
GO:0007631_feeding_behavior	28	0	0	1	1
GO:0008015_blood_circulation	34	0	0	1	1
GO:0008033_tRNA_processing	19	0	0	1	1
GO:0008037_cell_recognition	9	0	0	1	1
GO:0008045_motor_neuron_axon_guidance	26	0	0	1	1
GO:0008053_mitochondrial_fusion	15	0	0	1	1
GO:0008104_protein_localization	77	1.3	3.54	0.250458	1	HAP1
GO:0008150_biological_process	592	0.17	0.45	0.893345	1	FIBIN
GO:0008154_actin_polymerization_or_depolymerization	22	0	0	1	1
GO:0008156_negative_regulation_of_DNA_replication	18	0	0	1	1
GO:0008202_steroid_metabolic_process	43	0	0	1	1
GO:0008203_cholesterol_metabolic_process	75	1.33	3.63	0.244816	1	ABCG1
GO:0008206_bile_acid_metabolic_process	14	0	0	1	1
GO:0008209_androgen_metabolic_process	16	0	0	1	1
GO:0008210_estrogen_metabolic_process	20	0	0	1	1
GO:0008217_regulation_of_blood_pressure	66	0	0	1	1
GO:0008272_sulfate_transport	13	0	0	1	1
GO:0008286_insulin_receptor_signaling_pathway	84	0	0	1	1
GO:0008299_isoprenoid_biosynthetic_process	9	0	0	1	1
GO:0008306_associative_learning	27	0	0	1	1
GO:0008333_endosome_to_lysosome_transport	46	0	0	1	1
GO:0008334_histone_mRNA_metabolic_process	12	0	0	1	1
GO:0008340_determination_of_adult_lifespan	17	0	0	1	1
GO:0008343_adult_feeding_behavior	12	0	0	1	1
GO:0008344_adult_locomotory_behavior	48	0	0	1	1
GO:0008361_regulation_of_cell_size	21	0	0	1	1
GO:0008380_RNA_splicing	160	0	0	1	1
GO:0008406_gonad_development	11	0	0	1	1
GO:0008542_visual_learning	47	0	0	1	1
GO:0008543_fibroblast_growth_factor_receptor_signaling_pathway	80	0	0	1	1
GO:0008584_male_gonad_development	95	1.05	2.86	0.299391	1	SFRP1
GO:0008589_regulation_of_smoothened_signaling_pathway	21	0	0	1	1
GO:0008593_regulation_of_Notch_signaling_pathway	17	0	0	1	1
GO:0008608_attachment_of_spindle_microtubules_to_kinetochore	10	0	0	1	1
GO:0008610_lipid_biosynthetic_process	14	0	0	1	1
GO:0008611_ether_lipid_biosynthetic_process	6	0	0	1	1
GO:0008625_extrinsic_apoptotic_signaling_pathway_via_death_domain_receptors	33	0	0	1	1
GO:0008637_apoptotic_mitochondrial_changes	17	0	0	1	1
GO:0008643_carbohydrate_transport	23	0	0	1	1
GO:0008645_hexose_transmembrane_transport	13	0	0	1	1
GO:0008652_cellular_amino_acid_biosynthetic_process	25	0	0	1	1
GO:0008654_phospholipid_biosynthetic_process	24	0	0	1	1
GO:0009060_aerobic_respiration	32	0	0	1	1
GO:0009062_fatty_acid_catabolic_process	12	0	0	1	1
GO:0009083_branched-chain_amino_acid_catabolic_process	20	0	0	1	1
GO:0009100_glycoprotein_metabolic_process	11	0	0	1	1
GO:0009116_nucleoside_metabolic_process	12	0	0	1	1
GO:0009142_nucleoside_triphosphate_biosynthetic_process	9	0	0	1	1
GO:0009165_nucleotide_biosynthetic_process	11	0	0	1	1
GO:0009168_purine_ribonucleoside_monophosphate_biosynthetic_process	13	0	0	1	1
GO:0009235_cobalamin_metabolic_process	21	0	0	1	1
GO:0009303_rRNA_transcription	13	0	0	1	1
GO:0009306_protein_secretion	54	0	0	1	1
GO:0009311_oligosaccharide_metabolic_process	21	0	0	1	1
GO:0009312_oligosaccharide_biosynthetic_process	13	0	0	1	1
GO:0009313_oligosaccharide_catabolic_process	11	0	0	1	1
GO:0009314_response_to_radiation	23	0	0	1	1
GO:0009395_phospholipid_catabolic_process	12	0	0	1	1
GO:0009408_response_to_heat	42	0	0	1	1
GO:0009411_response_to_UV	42	0	0	1	1
GO:0009416_response_to_light_stimulus	22	0	0	1	1
GO:0009435_NAD_biosynthetic_process	12	0	0	1	1
GO:0009566_fertilization	39	0	0	1	1
GO:0009584_detection_of_visible_light	14	0	0	1	1
GO:0009611_response_to_wounding	60	0	0	1	1
GO:0009615_response_to_virus	104	0	0	1	1
GO:0009617_response_to_bacterium	94	0	0	1	1
GO:0009636_response_to_toxic_substance	83	1.2	3.28	0.267134	1	CLDN1
GO:0009650_UV_protection	13	0	0	1	1
GO:0009725_response_to_hormone	42	0	0	1	1
GO:0009743_response_to_carbohydrate	13	0	0	1	1
GO:0009755_hormone-mediated_signaling_pathway	47	0	0	1	1
GO:0009790_embryo_development	17	0	0	1	1
GO:0009791_post-embryonic_development	67	0	0	1	1
GO:0009792_embryo_development_ending_in_birth_or_egg_hatching	21	0	0	1	1
GO:0009880_embryonic_pattern_specification	26	0	0	1	1
GO:0009887_animal_organ_morphogenesis	134	0	0	1	1
GO:0009888_tissue_development	34	0	0	1	1
GO:0009948_anterior/posterior_axis_specification	16	0	0	1	1
GO:0009952_anterior/posterior_pattern_specification	97	0	0	1	1
GO:0009953_dorsal/ventral_pattern_formation	35	0	0	1	1
GO:0009954_proximal/distal_pattern_formation	26	0	0	1	1
GO:0009966_regulation_of_signal_transduction	27	0	0	1	1
GO:0009972_cytidine_deamination	12	0	0	1	1
GO:0010038_response_to_metal_ion	12	0	0	1	1
GO:0010039_response_to_iron_ion	18	0	0	1	1
GO:0010043_response_to_zinc_ion	31	0	0	1	1
GO:0010243_response_to_organonitrogen_compound	16	0	0	1	1
GO:0010269_response_to_selenium_ion	10	0	0	1	1
GO:0010273_detoxification_of_copper_ion	15	0	0	1	1
GO:0010288_response_to_lead_ion	19	0	0	1	1
GO:0010332_response_to_gamma_radiation	27	0	0	1	1
GO:0010389_regulation_of_G2/M_transition_of_mitotic_cell_cycle	80	0	0	1	1
GO:0010390_histone_monoubiquitination	12	0	0	1	1
GO:0010447_response_to_acidic_pH	14	0	0	1	1
GO:0010457_centriole-centriole_cohesion	11	0	0	1	1
GO:0010458_exit_from_mitosis	11	0	0	1	1
GO:0010459_negative_regulation_of_heart_rate	12	0	0	1	1
GO:0010466_negative_regulation_of_peptidase_activity	14	0	0	1	1
GO:0010467_gene_expression	21	0	0	1	1
GO:0010468_regulation_of_gene_expression	227	0.44	1.18	0.573567	1	TGFBR2
GO:0010469_regulation_of_signaling_receptor_activity	15	0	0	1	1
GO:0010498_proteasomal_protein_catabolic_process	34	0	0	1	1
GO:0010499_proteasomal_ubiquitin-independent_protein_catabolic_process	22	0	0	1	1
GO:0010501_RNA_secondary_structure_unwinding	8	0	0	1	1
GO:0010506_regulation_of_autophagy	69	0	0	1	1
GO:0010507_negative_regulation_of_autophagy	51	0	0	1	1
GO:0010508_positive_regulation_of_autophagy	57	0	0	1	1
GO:0010510_regulation_of_acetyl-CoA_biosynthetic_process_from_pyruvate	8	0	0	1	1
GO:0010524_positive_regulation_of_calcium_ion_transport_into_cytosol	12	0	0	1	1
GO:0010529_negative_regulation_of_transposition	19	0	0	1	1
GO:0010569_regulation_of_double-strand_break_repair_via_homologous_recombination	19	0	0	1	1
GO:0010586_miRNA_metabolic_process	16	0	0	1	1
GO:0010592_positive_regulation_of_lamellipodium_assembly	25	0	0	1	1
GO:0010595_positive_regulation_of_endothelial_cell_migration	61	0	0	1	1
GO:0010596_negative_regulation_of_endothelial_cell_migration	24	0	0	1	1
GO:0010608_posttranscriptional_regulation_of_gene_expression	24	0	0	1	1
GO:0010613_positive_regulation_of_cardiac_muscle_hypertrophy	21	0	0	1	1
GO:0010614_negative_regulation_of_cardiac_muscle_hypertrophy	19	0	0	1	1
GO:0010629_negative_regulation_of_gene_expression	260	0.77	2.09	0.253217	1	MEF2C;SFRP1
GO:0010633_negative_regulation_of_epithelial_cell_migration	16	0	0	1	1
GO:0010666_positive_regulation_of_cardiac_muscle_cell_apoptotic_process	19	0	0	1	1
GO:0010667_negative_regulation_of_cardiac_muscle_cell_apoptotic_process	37	0	0	1	1
GO:0010700_negative_regulation_of_norepinephrine_secretion	8	0	0	1	1
GO:0010738_regulation_of_protein_kinase_A_signaling	15	0	0	1	1
GO:0010739_positive_regulation_of_protein_kinase_A_signaling	11	0	0	1	1
GO:0010744_positive_regulation_of_macrophage_derived_foam_cell_differentiation	19	0	0	1	1
GO:0010759_positive_regulation_of_macrophage_chemotaxis	19	0	0	1	1
GO:0010761_fibroblast_migration	13	0	0	1	1
GO:0010763_positive_regulation_of_fibroblast_migration	14	0	0	1	1
GO:0010765_positive_regulation_of_sodium_ion_transport	16	0	0	1	1
GO:0010803_regulation_of_tumor_necrosis_factor-mediated_signaling_pathway	29	0	0	1	1
GO:0010804_negative_regulation_of_tumor_necrosis_factor-mediated_signaling_pathway	24	0	0	1	1
GO:0010812_negative_regulation_of_cell-substrate_adhesion	18	0	0	1	1
GO:0010818_T_cell_chemotaxis	12	0	0	1	1
GO:0010820_positive_regulation_of_T_cell_chemotaxis	16	0	0	1	1
GO:0010821_regulation_of_mitochondrion_organization	19	0	0	1	1
GO:0010824_regulation_of_centrosome_duplication	19	0	0	1	1
GO:0010831_positive_regulation_of_myotube_differentiation	15	0	0	1	1
GO:0010832_negative_regulation_of_myotube_differentiation	16	0	0	1	1
GO:0010838_positive_regulation_of_keratinocyte_proliferation	14	0	0	1	1
GO:0010839_negative_regulation_of_keratinocyte_proliferation	18	0	0	1	1
GO:0010842_retina_layer_formation	25	0	0	1	1
GO:0010862_positive_regulation_of_pathway-restricted_SMAD_protein_phosphorylation	48	0	0	1	1
GO:0010863_positive_regulation_of_phospholipase_C_activity	13	0	0	1	1
GO:0010867_positive_regulation_of_triglyceride_biosynthetic_process	15	0	0	1	1
GO:0010873_positive_regulation_of_cholesterol_esterification	9	0	0	1	1
GO:0010880_regulation_of_release_of_sequestered_calcium_ion_into_cytosol_by_sarcoplasmic_reticulum	20	0	0	1	1
GO:0010881_regulation_of_cardiac_muscle_contraction_by_regulation_of_the_release_of_sequestered_calcium_ion	24	0	0	1	1
GO:0010884_positive_regulation_of_lipid_storage	13	0	0	1	1
GO:0010890_positive_regulation_of_sequestering_of_triglyceride	9	0	0	1	1
GO:0010898_positive_regulation_of_triglyceride_catabolic_process	9	0	0	1	1
GO:0010906_regulation_of_glucose_metabolic_process	26	0	0	1	1
GO:0010917_negative_regulation_of_mitochondrial_membrane_potential	14	0	0	1	1
GO:0010918_positive_regulation_of_mitochondrial_membrane_potential	11	0	0	1	1
GO:0010940_positive_regulation_of_necrotic_cell_death	10	0	0	1	1
GO:0010942_positive_regulation_of_cell_death	36	0	0	1	1
GO:0010950_positive_regulation_of_endopeptidase_activity	11	0	0	1	1
GO:0010951_negative_regulation_of_endopeptidase_activity	147	0	0	1	1
GO:0010952_positive_regulation_of_peptidase_activity	13	0	0	1	1
GO:0010954_positive_regulation_of_protein_processing	15	0	0	1	1
GO:0010955_negative_regulation_of_protein_processing	15	0	0	1	1
GO:0010971_positive_regulation_of_G2/M_transition_of_mitotic_cell_cycle	27	0	0	1	1
GO:0010972_negative_regulation_of_G2/M_transition_of_mitotic_cell_cycle	60	0	0	1	1
GO:0010976_positive_regulation_of_neuron_projection_development	114	0.88	2.38	0.347614	1	ATP1B2
GO:0010977_negative_regulation_of_neuron_projection_development	64	0	0	1	1
GO:0010989_negative_regulation_of_low-density_lipoprotein_particle_clearance	14	0	0	1	1
GO:0010996_response_to_auditory_stimulus	14	0	0	1	1
GO:0014002_astrocyte_development	16	0	0	1	1
GO:0014003_oligodendrocyte_development	27	0	0	1	1
GO:0014032_neural_crest_cell_development	21	0	0	1	1
GO:0014047_glutamate_secretion	30	0	0	1	1
GO:0014059_regulation_of_dopamine_secretion	29	0	0	1	1
GO:0014065_phosphatidylinositol_3-kinase_signaling	37	0	0	1	1
GO:0014066_regulation_of_phosphatidylinositol_3-kinase_signaling	22	0	0	1	1
GO:0014067_negative_regulation_of_phosphatidylinositol_3-kinase_signaling	17	0	0	1	1
GO:0014068_positive_regulation_of_phosphatidylinositol_3-kinase_signaling	88	1.14	3.09	0.280749	1	PRR5L
GO:0014075_response_to_amine	11	0	0	1	1
GO:0014823_response_to_activity	47	0	0	1	1
GO:0014850_response_to_muscle_activity	21	0	0	1	1
GO:0014911_positive_regulation_of_smooth_muscle_cell_migration	19	0	0	1	1
GO:0014912_negative_regulation_of_smooth_muscle_cell_migration	13	0	0	1	1
GO:0015012_heparan_sulfate_proteoglycan_biosynthetic_process	14	0	0	1	1
GO:0015031_protein_transport	320	0	0	1	1
GO:0015074_DNA_integration	8	0	0	1	1
GO:0015671_oxygen_transport	15	0	0	1	1
GO:0015693_magnesium_ion_transport	13	0	0	1	1
GO:0015695_organic_cation_transport	10	0	0	1	1
GO:0015698_inorganic_anion_transport	23	0	0	1	1
GO:0015701_bicarbonate_transport	43	0	0	1	1
GO:0015711_organic_anion_transport	17	0	0	1	1
GO:0015718_monocarboxylic_acid_transport	16	0	0	1	1
GO:0015721_bile_acid_and_bile_salt_transport	28	0	0	1	1
GO:0015760_glucose-6-phosphate_transport	6	0	0	1	1
GO:0015804_neutral_amino_acid_transport	13	0	0	1	1
GO:0015810_aspartate_transmembrane_transport	9	0	0	1	1
GO:0015813_L-glutamate_transmembrane_transport	15	0	0	1	1
GO:0015816_glycine_transport	9	0	0	1	1
GO:0015867_ATP_transport	28	0	0	1	1
GO:0015871_choline_transport	7	0	0	1	1
GO:0015886_heme_transport	8	0	0	1	1
GO:0015909_long-chain_fatty_acid_transport	16	0	0	1	1
GO:0015914_phospholipid_transport	26	0	0	1	1
GO:0015918_sterol_transport	17	0	0	1	1
GO:0015937_coenzyme_A_biosynthetic_process	10	0	0	1	1
GO:0015939_pantothenate_metabolic_process	7	0	0	1	1
GO:0015986_ATP_synthesis_coupled_proton_transport	13	0	0	1	1
GO:0016024_CDP-diacylglycerol_biosynthetic_process	13	0	0	1	1
GO:0016032_viral_process	454	0.22	0.59	0.819482	1	POLA1
GO:0016042_lipid_catabolic_process	80	0	0	1	1
GO:0016045_detection_of_bacterium	12	0	0	1	1
GO:0016050_vesicle_organization	13	0	0	1	1
GO:0016055_Wnt_signaling_pathway	191	0.52	1.41	0.511613	1	LEF1
GO:0016056_rhodopsin_mediated_signaling_pathway	11	0	0	1	1
GO:0016064_immunoglobulin_mediated_immune_response	13	0	0	1	1
GO:0016070_RNA_metabolic_process	46	0	0	1	1
GO:0016075_rRNA_catabolic_process	16	0	0	1	1
GO:0016079_synaptic_vesicle_exocytosis	24	0	0	1	1
GO:0016081_synaptic_vesicle_docking	11	0	0	1	1
GO:0016082_synaptic_vesicle_priming	16	0	0	1	1
GO:0016125_sterol_metabolic_process	23	0	0	1	1
GO:0016126_sterol_biosynthetic_process	17	0	0	1	1
GO:0016180_snRNA_processing	13	0	0	1	1
GO:0016188_synaptic_vesicle_maturation	11	0	0	1	1
GO:0016192_vesicle-mediated_transport	149	0.67	1.81	0.428002	1	SYTL2
GO:0016197_endosomal_transport	90	0	0	1	1
GO:0016226_iron-sulfur_cluster_assembly	20	0	0	1	1
GO:0016233_telomere_capping	28	0	0	1	1
GO:0016236_macroautophagy	93	0	0	1	1
GO:0016239_positive_regulation_of_macroautophagy	33	0	0	1	1
GO:0016241_regulation_of_macroautophagy	71	0	0	1	1
GO:0016242_negative_regulation_of_macroautophagy	15	0	0	1	1
GO:0016254_preassembly_of_GPI_anchor_in_ER_membrane	17	0	0	1	1
GO:0016255_attachment_of_GPI_anchor_to_protein	6	0	0	1	1
GO:0016264_gap_junction_assembly	8	0	0	1	1
GO:0016266_O-glycan_processing	59	0	0	1	1
GO:0016310_phosphorylation	98	0	0	1	1
GO:0016311_dephosphorylation	90	1.11	3.02	0.286125	1	NT5E
GO:0016322_neuron_remodeling	12	0	0	1	1
GO:0016331_morphogenesis_of_embryonic_epithelium	11	0	0	1	1
GO:0016358_dendrite_development	42	0	0	1	1
GO:0016446_somatic_hypermutation_of_immunoglobulin_genes	13	0	0	1	1
GO:0016477_cell_migration	232	0.86	2.35	0.214705	1	PALLD;CDH2
GO:0016485_protein_processing	56	0	0	1	1
GO:0016486_peptide_hormone_processing	18	0	0	1	1
GO:0016525_negative_regulation_of_angiogenesis	128	0	0	1	1
GO:0016540_protein_autoprocessing	21	0	0	1	1
GO:0016554_cytidine_to_uridine_editing	12	0	0	1	1
GO:0016558_protein_import_into_peroxisome_matrix	11	0	0	1	1
GO:0016559_peroxisome_fission	9	0	0	1	1
GO:0016567_protein_ubiquitination	490	0.61	1.66	0.276507	1	RNF128;HIF3A;BRCA1
GO:0016571_histone_methylation	18	0	0	1	1
GO:0016572_histone_phosphorylation	13	0	0	1	1
GO:0016573_histone_acetylation	46	0	0	1	1
GO:0016575_histone_deacetylation	38	0	0	1	1
GO:0016578_histone_deubiquitination	13	0	0	1	1
GO:0016584_nucleosome_positioning	14	0	0	1	1
GO:0016601_Rac_protein_signal_transduction	23	0	0	1	1
GO:0016925_protein_sumoylation	63	0	0	1	1
GO:0016926_protein_desumoylation	7	0	0	1	1
GO:0016973_poly(A)+_mRNA_export_from_nucleus	20	0	0	1	1
GO:0017121_plasma_membrane_phospholipid_scrambling	8	0	0	1	1
GO:0017144_drug_metabolic_process	26	0	0	1	1
GO:0017148_negative_regulation_of_translation	79	1.27	3.45	0.256058	1	EIF2AK3
GO:0017156_calcium-ion_regulated_exocytosis	29	0	0	1	1
GO:0017158_regulation_of_calcium_ion-dependent_exocytosis	18	0	0	1	1
GO:0017183_peptidyl-diphthamide_biosynthetic_process_from_peptidyl-histidine	7	0	0	1	1
GO:0017185_peptidyl-lysine_hydroxylation	7	0	0	1	1
GO:0018022_peptidyl-lysine_methylation	12	0	0	1	1
GO:0018023_peptidyl-lysine_trimethylation	11	0	0	1	1
GO:0018026_peptidyl-lysine_monomethylation	10	0	0	1	1
GO:0018095_protein_polyglutamylation	13	0	0	1	1
GO:0018107_peptidyl-threonine_phosphorylation	64	1.56	4.27	0.213027	1	TGFBR2
GO:0018146_keratan_sulfate_biosynthetic_process	28	0	0	1	1
GO:0018230_peptidyl-L-cysteine_S-palmitoylation	23	0	0	1	1
GO:0018242_protein_O-linked_glycosylation_via_serine	10	0	0	1	1
GO:0018279_protein_N-linked_glycosylation_via_asparagine	30	0	0	1	1
GO:0018298_protein-chromophore_linkage	14	0	0	1	1
GO:0018344_protein_geranylgeranylation	6	0	0	1	1
GO:0018345_protein_palmitoylation	26	0	0	1	1
GO:0018401_peptidyl-proline_hydroxylation_to_4-hydroxy-L-proline	11	0	0	1	1
GO:0019058_viral_life_cycle	30	0	0	1	1
GO:0019068_virion_assembly	12	0	0	1	1
GO:0019079_viral_genome_replication	14	0	0	1	1
GO:0019083_viral_transcription	109	0	0	1	1
GO:0019221_cytokine-mediated_signaling_pathway	282	0.71	1.93	0.283621	1	ANXA1;IL1RAP
GO:0019226_transmission_of_nerve_impulse	19	0	0	1	1
GO:0019228_neuronal_action_potential	29	0	0	1	1
GO:0019229_regulation_of_vasoconstriction	16	0	0	1	1
GO:0019233_sensory_perception_of_pain	53	0	0	1	1
GO:0019367_fatty_acid_elongation,_saturated_fatty_acid	7	0	0	1	1
GO:0019369_arachidonic_acid_metabolic_process	30	0	0	1	1
GO:0019370_leukotriene_biosynthetic_process	11	0	0	1	1
GO:0019371_cyclooxygenase_pathway	11	0	0	1	1
GO:0019372_lipoxygenase_pathway	16	0	0	1	1
GO:0019373_epoxygenase_P450_pathway	20	0	0	1	1
GO:0019395_fatty_acid_oxidation	15	0	0	1	1
GO:0019430_removal_of_superoxide_radicals	13	0	0	1	1
GO:0019432_triglyceride_biosynthetic_process	18	0	0	1	1
GO:0019433_triglyceride_catabolic_process	27	0	0	1	1
GO:0019441_tryptophan_catabolic_process_to_kynurenine	5	0	0	1	1
GO:0019509_L-methionine_salvage_from_methylthioadenosine	5	0	0	1	1
GO:0019532_oxalate_transport	10	0	0	1	1
GO:0019722_calcium-mediated_signaling	84	1.19	3.24	0.269877	1	EIF2AK3
GO:0019725_cellular_homeostasis	13	0	0	1	1
GO:0019730_antimicrobial_humoral_response	55	0	0	1	1
GO:0019731_antibacterial_humoral_response	44	0	0	1	1
GO:0019827_stem_cell_population_maintenance	51	0	0	1	1
GO:0019835_cytolysis	18	0	0	1	1
GO:0019852_L-ascorbic_acid_metabolic_process	9	0	0	1	1
GO:0019882_antigen_processing_and_presentation	21	0	0	1	1
GO:0019885_antigen_processing_and_presentation_of_endogenous_peptide_antigen_via_MHC_class_I	9	0	0	1	1
GO:0019886_antigen_processing_and_presentation_of_exogenous_peptide_antigen_via_MHC_class_II	97	0	0	1	1
GO:0019915_lipid_storage	24	0	0	1	1
GO:0019933_cAMP-mediated_signaling	29	0	0	1	1
GO:0019934_cGMP-mediated_signaling	20	0	0	1	1
GO:0019985_translesion_synthesis	35	0	0	1	1
GO:0021510_spinal_cord_development	32	0	0	1	1
GO:0021522_spinal_cord_motor_neuron_differentiation	19	0	0	1	1
GO:0021527_spinal_cord_association_neuron_differentiation	13	0	0	1	1
GO:0021537_telencephalon_development	18	0	0	1	1
GO:0021591_ventricular_system_development	19	0	0	1	1
GO:0021675_nerve_development	15	0	0	1	1
GO:0021702_cerebellar_Purkinje_cell_differentiation	12	0	0	1	1
GO:0021756_striatum_development	12	0	0	1	1
GO:0021762_substantia_nigra_development	43	0	0	1	1
GO:0021766_hippocampus_development	64	0	0	1	1
GO:0021772_olfactory_bulb_development	18	0	0	1	1
GO:0021794_thalamus_development	12	0	0	1	1
GO:0021819_layer_formation_in_cerebral_cortex	11	0	0	1	1
GO:0021846_cell_proliferation_in_forebrain	12	0	0	1	1
GO:0021854_hypothalamus_development	12	0	0	1	1
GO:0021895_cerebral_cortex_neuron_differentiation	13	0	0	1	1
GO:0021915_neural_tube_development	29	0	0	1	1
GO:0021954_central_nervous_system_neuron_development	14	0	0	1	1
GO:0021983_pituitary_gland_development	27	0	0	1	1
GO:0021987_cerebral_cortex_development	70	1.43	3.9	0.230527	1	CDH2
GO:0022010_central_nervous_system_myelination	14	0	0	1	1
GO:0022011_myelination_in_peripheral_nervous_system	18	0	0	1	1
GO:0022038_corpus_callosum_development	14	0	0	1	1
GO:0022400_regulation_of_rhodopsin_mediated_signaling_pathway	26	0	0	1	1
GO:0022408_negative_regulation_of_cell-cell_adhesion	15	0	0	1	1
GO:0022604_regulation_of_cell_morphogenesis	24	0	0	1	1
GO:0022617_extracellular_matrix_disassembly	64	0	0	1	1
GO:0022900_electron_transport_chain	68	1.47	4.01	0.224737	1	TXNRD1
GO:0022904_respiratory_electron_transport_chain	17	0	0	1	1
GO:0023014_signal_transduction_by_protein_phosphorylation	19	0	0	1	1
GO:0023019_signal_transduction_involved_in_regulation_of_gene_expression	20	0	0	1	1
GO:0030031_cell_projection_assembly	23	0	0	1	1
GO:0030032_lamellipodium_assembly	33	0	0	1	1
GO:0030041_actin_filament_polymerization	33	0	0	1	1
GO:0030042_actin_filament_depolymerization	11	0	0	1	1
GO:0030048_actin_filament-based_movement	18	0	0	1	1
GO:0030050_vesicle_transport_along_actin_filament	19	0	0	1	1
GO:0030071_regulation_of_mitotic_metaphase/anaphase_transition	10	0	0	1	1
GO:0030099_myeloid_cell_differentiation	18	0	0	1	1
GO:0030100_regulation_of_endocytosis	35	0	0	1	1
GO:0030101_natural_killer_cell_activation	22	0	0	1	1
GO:0030148_sphingolipid_biosynthetic_process	52	0	0	1	1
GO:0030150_protein_import_into_mitochondrial_matrix	19	0	0	1	1
GO:0030162_regulation_of_proteolysis	12	0	0	1	1
GO:0030163_protein_catabolic_process	26	0	0	1	1
GO:0030166_proteoglycan_biosynthetic_process	18	0	0	1	1
GO:0030168_platelet_activation	101	0.99	2.69	0.314989	1	PDPN
GO:0030182_neuron_differentiation	152	0.66	1.78	0.434417	1	MEF2C
GO:0030183_B_cell_differentiation	74	0	0	1	1
GO:0030194_positive_regulation_of_blood_coagulation	14	0	0	1	1
GO:0030195_negative_regulation_of_blood_coagulation	13	0	0	1	1
GO:0030206_chondroitin_sulfate_biosynthetic_process	26	0	0	1	1
GO:0030207_chondroitin_sulfate_catabolic_process	14	0	0	1	1
GO:0030208_dermatan_sulfate_biosynthetic_process	12	0	0	1	1
GO:0030212_hyaluronan_metabolic_process	11	0	0	1	1
GO:0030217_T_cell_differentiation	36	0	0	1	1
GO:0030218_erythrocyte_differentiation	48	0	0	1	1
GO:0030225_macrophage_differentiation	22	0	0	1	1
GO:0030238_male_sex_determination	12	0	0	1	1
GO:0030239_myofibril_assembly	13	0	0	1	1
GO:0030259_lipid_glycosylation	12	0	0	1	1
GO:0030261_chromosome_condensation	19	0	0	1	1
GO:0030277_maintenance_of_gastrointestinal_epithelium	15	0	0	1	1
GO:0030278_regulation_of_ossification	12	0	0	1	1
GO:0030301_cholesterol_transport	19	0	0	1	1
GO:0030311_poly-N-acetyllactosamine_biosynthetic_process	12	0	0	1	1
GO:0030316_osteoclast_differentiation	31	0	0	1	1
GO:0030317_flagellated_sperm_motility	67	0	0	1	1
GO:0030322_stabilization_of_membrane_potential	17	0	0	1	1
GO:0030325_adrenal_gland_development	21	0	0	1	1
GO:0030330_DNA_damage_response,_signal_transduction_by_p53_class_mediator	17	0	0	1	1
GO:0030334_regulation_of_cell_migration	100	1	2.71	0.312414	1	LAMA4
GO:0030388_fructose_1,6-bisphosphate_metabolic_process	9	0	0	1	1
GO:0030422_production_of_siRNA_involved_in_RNA_interference	11	0	0	1	1
GO:0030431_sleep	12	0	0	1	1
GO:0030433_ubiquitin-dependent_ERAD_pathway	70	0	0	1	1
GO:0030449_regulation_of_complement_activation	48	0	0	1	1
GO:0030488_tRNA_methylation	33	0	0	1	1
GO:0030490_maturation_of_SSU-rRNA	16	0	0	1	1
GO:0030500_regulation_of_bone_mineralization	20	0	0	1	1
GO:0030502_negative_regulation_of_bone_mineralization	17	0	0	1	1
GO:0030511_positive_regulation_of_transforming_growth_factor_beta_receptor_signaling_pathway	30	0	0	1	1
GO:0030513_positive_regulation_of_BMP_signaling_pathway	35	0	0	1	1
GO:0030516_regulation_of_axon_extension	14	0	0	1	1
GO:0030517_negative_regulation_of_axon_extension	17	0	0	1	1
GO:0030518_intracellular_steroid_hormone_receptor_signaling_pathway	11	0	0	1	1
GO:0030520_intracellular_estrogen_receptor_signaling_pathway	21	0	0	1	1
GO:0030521_androgen_receptor_signaling_pathway	19	0	0	1	1
GO:0030522_intracellular_receptor_signaling_pathway	26	0	0	1	1
GO:0030534_adult_behavior	30	0	0	1	1
GO:0030539_male_genitalia_development	19	0	0	1	1
GO:0030574_collagen_catabolic_process	43	0	0	1	1
GO:0030593_neutrophil_chemotaxis	77	0	0	1	1
GO:0030595_leukocyte_chemotaxis	23	0	0	1	1
GO:0030705_cytoskeleton-dependent_intracellular_transport	19	0	0	1	1
GO:0030833_regulation_of_actin_filament_polymerization	26	0	0	1	1
GO:0030837_negative_regulation_of_actin_filament_polymerization	20	0	0	1	1
GO:0030838_positive_regulation_of_actin_filament_polymerization	51	0	0	1	1
GO:0030855_epithelial_cell_differentiation	68	1.47	4.01	0.224737	1	CNN3
GO:0030857_negative_regulation_of_epithelial_cell_differentiation	11	0	0	1	1
GO:0030865_cortical_cytoskeleton_organization	19	0	0	1	1
GO:0030866_cortical_actin_cytoskeleton_organization	29	0	0	1	1
GO:0030878_thyroid_gland_development	21	0	0	1	1
GO:0030889_negative_regulation_of_B_cell_proliferation	17	0	0	1	1
GO:0030900_forebrain_development	46	0	0	1	1
GO:0030901_midbrain_development	29	0	0	1	1
GO:0030902_hindbrain_development	18	0	0	1	1
GO:0030948_negative_regulation_of_vascular_endothelial_growth_factor_receptor_signaling_pathway	14	0	0	1	1
GO:0030949_positive_regulation_of_vascular_endothelial_growth_factor_receptor_signaling_pathway	17	0	0	1	1
GO:0030970_retrograde_protein_transport,_ER_to_cytosol	15	0	0	1	1
GO:0031023_microtubule_organizing_center_organization	9	0	0	1	1
GO:0031047_gene_silencing_by_RNA	35	0	0	1	1
GO:0031053_primary_miRNA_processing	10	0	0	1	1
GO:0031054_pre-miRNA_processing	14	0	0	1	1
GO:0031065_positive_regulation_of_histone_deacetylation	11	0	0	1	1
GO:0031076_embryonic_camera-type_eye_development	12	0	0	1	1
GO:0031098_stress-activated_protein_kinase_signaling_cascade	20	0	0	1	1
GO:0031103_axon_regeneration	16	0	0	1	1
GO:0031110_regulation_of_microtubule_polymerization_or_depolymerization	18	0	0	1	1
GO:0031113_regulation_of_microtubule_polymerization	11	0	0	1	1
GO:0031115_negative_regulation_of_microtubule_polymerization	13	0	0	1	1
GO:0031116_positive_regulation_of_microtubule_polymerization	26	0	0	1	1
GO:0031122_cytoplasmic_microtubule_organization	50	0	0	1	1
GO:0031124_mRNA_3'-end_processing	59	0	0	1	1
GO:0031145_anaphase-promoting_complex-dependent_catabolic_process	83	0	0	1	1
GO:0031146_SCF-dependent_proteasomal_ubiquitin-dependent_protein_catabolic_process	92	0	0	1	1
GO:0031167_rRNA_methylation	17	0	0	1	1
GO:0031175_neuron_projection_development	115	0	0	1	1
GO:0031274_positive_regulation_of_pseudopodium_assembly	13	0	0	1	1
GO:0031284_positive_regulation_of_guanylate_cyclase_activity	10	0	0	1	1
GO:0031290_retinal_ganglion_cell_axon_guidance	18	0	0	1	1
GO:0031293_membrane_protein_intracellular_domain_proteolysis	17	0	0	1	1
GO:0031297_replication_fork_processing	29	0	0	1	1
GO:0031334_positive_regulation_of_protein-containing_complex_assembly	54	0	0	1	1
GO:0031396_regulation_of_protein_ubiquitination	16	0	0	1	1
GO:0031529_ruffle_organization	14	0	0	1	1
GO:0031573_intra-S_DNA_damage_checkpoint	15	0	0	1	1
GO:0031581_hemidesmosome_assembly	12	0	0	1	1
GO:0031629_synaptic_vesicle_fusion_to_presynaptic_active_zone_membrane	13	0	0	1	1
GO:0031638_zymogen_activation	21	0	0	1	1
GO:0031640_killing_of_cells_of_other_organism	37	0	0	1	1
GO:0031641_regulation_of_myelination	20	0	0	1	1
GO:0031643_positive_regulation_of_myelination	19	0	0	1	1
GO:0031647_regulation_of_protein_stability	81	1.23	3.36	0.261616	1	RNF128
GO:0031648_protein_destabilization	50	0	0	1	1
GO:0031663_lipopolysaccharide-mediated_signaling_pathway	34	0	0	1	1
GO:0031665_negative_regulation_of_lipopolysaccharide-mediated_signaling_pathway	11	0	0	1	1
GO:0031667_response_to_nutrient_levels	41	0	0	1	1
GO:0031668_cellular_response_to_extracellular_stimulus	19	0	0	1	1
GO:0031669_cellular_response_to_nutrient_levels	14	0	0	1	1
GO:0031929_TOR_signaling	19	0	0	1	1
GO:0031936_negative_regulation_of_chromatin_silencing	13	0	0	1	1
GO:0031953_negative_regulation_of_protein_autophosphorylation	12	0	0	1	1
GO:0031954_positive_regulation_of_protein_autophosphorylation	24	0	0	1	1
GO:0032000_positive_regulation_of_fatty_acid_beta-oxidation	10	0	0	1	1
GO:0032006_regulation_of_TOR_signaling	20	0	0	1	1
GO:0032008_positive_regulation_of_TOR_signaling	34	0	0	1	1
GO:0032012_regulation_of_ARF_protein_signal_transduction	17	0	0	1	1
GO:0032020_ISG15-protein_conjugation	6	0	0	1	1
GO:0032024_positive_regulation_of_insulin_secretion	42	0	0	1	1
GO:0032049_cardiolipin_biosynthetic_process	8	0	0	1	1
GO:0032088_negative_regulation_of_NF-kappaB_transcription_factor_activity	88	0	0	1	1
GO:0032091_negative_regulation_of_protein_binding	77	0	0	1	1
GO:0032092_positive_regulation_of_protein_binding	70	0	0	1	1
GO:0032094_response_to_food	21	0	0	1	1
GO:0032099_negative_regulation_of_appetite	10	0	0	1	1
GO:0032148_activation_of_protein_kinase_B_activity	34	0	0	1	1
GO:0032200_telomere_organization	27	0	0	1	1
GO:0032204_regulation_of_telomere_maintenance	12	0	0	1	1
GO:0032211_negative_regulation_of_telomere_maintenance_via_telomerase	20	0	0	1	1
GO:0032212_positive_regulation_of_telomere_maintenance_via_telomerase	34	0	0	1	1
GO:0032228_regulation_of_synaptic_transmission,_GABAergic	15	0	0	1	1
GO:0032233_positive_regulation_of_actin_filament_bundle_assembly	13	0	0	1	1
GO:0032259_methylation	59	1.69	4.64	0.198143	1	METTL7B
GO:0032270_positive_regulation_of_cellular_protein_metabolic_process	16	0	0	1	1
GO:0032330_regulation_of_chondrocyte_differentiation	10	0	0	1	1
GO:0032331_negative_regulation_of_chondrocyte_differentiation	21	0	0	1	1
GO:0032332_positive_regulation_of_chondrocyte_differentiation	19	0	0	1	1
GO:0032402_melanosome_transport	21	0	0	1	1
GO:0032418_lysosome_localization	28	0	0	1	1
GO:0032434_regulation_of_proteasomal_ubiquitin-dependent_protein_catabolic_process	13	0	0	1	1
GO:0032435_negative_regulation_of_proteasomal_ubiquitin-dependent_protein_catabolic_process	32	0	0	1	1
GO:0032436_positive_regulation_of_proteasomal_ubiquitin-dependent_protein_catabolic_process	73	1.37	3.73	0.239133	1	SMAD7
GO:0032438_melanosome_organization	23	0	0	1	1
GO:0032446_protein_modification_by_small_protein_conjugation	11	0	0	1	1
GO:0032456_endocytic_recycling	40	0	0	1	1
GO:0032465_regulation_of_cytokinesis	42	0	0	1	1
GO:0032467_positive_regulation_of_cytokinesis	39	0	0	1	1
GO:0032469_endoplasmic_reticulum_calcium_ion_homeostasis	17	0	0	1	1
GO:0032480_negative_regulation_of_type_I_interferon_production	32	0	0	1	1
GO:0032481_positive_regulation_of_type_I_interferon_production	52	0	0	1	1
GO:0032482_Rab_protein_signal_transduction	14	0	0	1	1
GO:0032486_Rap_protein_signal_transduction	10	0	0	1	1
GO:0032495_response_to_muramyl_dipeptide	12	0	0	1	1
GO:0032496_response_to_lipopolysaccharide	138	0.72	1.96	0.403856	1	CLDN1
GO:0032502_developmental_process	28	0	0	1	1
GO:0032509_endosome_transport_via_multivesicular_body_sorting_pathway	13	0	0	1	1
GO:0032511_late_endosome_to_vacuole_transport_via_multivesicular_body_sorting_pathway	11	0	0	1	1
GO:0032515_negative_regulation_of_phosphoprotein_phosphatase_activity	50	0	0	1	1
GO:0032516_positive_regulation_of_phosphoprotein_phosphatase_activity	15	0	0	1	1
GO:0032525_somite_rostral/caudal_axis_specification	12	0	0	1	1
GO:0032526_response_to_retinoic_acid	44	0	0	1	1
GO:0032543_mitochondrial_translation	31	0	0	1	1
GO:0032570_response_to_progesterone	42	0	0	1	1
GO:0032609_interferon-gamma_production	17	0	0	1	1
GO:0032611_interleukin-1_beta_production	13	0	0	1	1
GO:0032635_interleukin-6_production	13	0	0	1	1
GO:0032675_regulation_of_interleukin-6_production	10	0	0	1	1
GO:0032688_negative_regulation_of_interferon-beta_production	14	0	0	1	1
GO:0032691_negative_regulation_of_interleukin-1_beta_production	39	0	0	1	1
GO:0032695_negative_regulation_of_interleukin-12_production	17	0	0	1	1
GO:0032700_negative_regulation_of_interleukin-17_production	22	0	0	1	1
GO:0032715_negative_regulation_of_interleukin-6_production	66	0	0	1	1
GO:0032720_negative_regulation_of_tumor_necrosis_factor_production	55	0	0	1	1
GO:0032722_positive_regulation_of_chemokine_production	19	0	0	1	1
GO:0032725_positive_regulation_of_granulocyte_macrophage_colony-stimulating_factor_production	11	0	0	1	1
GO:0032727_positive_regulation_of_interferon-alpha_production	20	0	0	1	1
GO:0032728_positive_regulation_of_interferon-beta_production	30	0	0	1	1
GO:0032729_positive_regulation_of_interferon-gamma_production	65	0	0	1	1
GO:0032731_positive_regulation_of_interleukin-1_beta_production	53	0	0	1	1
GO:0032735_positive_regulation_of_interleukin-12_production	35	0	0	1	1
GO:0032740_positive_regulation_of_interleukin-17_production	18	0	0	1	1
GO:0032753_positive_regulation_of_interleukin-4_production	24	0	0	1	1
GO:0032755_positive_regulation_of_interleukin-6_production	88	0	0	1	1
GO:0032757_positive_regulation_of_interleukin-8_production	54	0	0	1	1
GO:0032760_positive_regulation_of_tumor_necrosis_factor_production	50	0	0	1	1
GO:0032784_regulation_of_DNA-templated_transcription,_elongation	9	0	0	1	1
GO:0032786_positive_regulation_of_DNA-templated_transcription,_elongation	16	0	0	1	1
GO:0032793_positive_regulation_of_CREB_transcription_factor_activity	19	0	0	1	1
GO:0032801_receptor_catabolic_process	13	0	0	1	1
GO:0032802_low-density_lipoprotein_particle_receptor_catabolic_process	10	0	0	1	1
GO:0032836_glomerular_basement_membrane_development	9	0	0	1	1
GO:0032868_response_to_insulin	67	0	0	1	1
GO:0032869_cellular_response_to_insulin_stimulus	100	1	2.71	0.312414	1	RAB31
GO:0032870_cellular_response_to_hormone_stimulus	29	0	0	1	1
GO:0032874_positive_regulation_of_stress-activated_MAPK_cascade	18	0	0	1	1
GO:0032880_regulation_of_protein_localization	59	0	0	1	1
GO:0032886_regulation_of_microtubule-based_process	9	0	0	1	1
GO:0032897_negative_regulation_of_viral_transcription	13	0	0	1	1
GO:0032922_circadian_regulation_of_gene_expression	66	1.52	4.14	0.218904	1	ARNTL
GO:0032930_positive_regulation_of_superoxide_anion_generation	19	0	0	1	1
GO:0032933_SREBP_signaling_pathway	9	0	0	1	1
GO:0032956_regulation_of_actin_cytoskeleton_organization	74	1.35	3.68	0.24198	1	GRHL3
GO:0032958_inositol_phosphate_biosynthetic_process	11	0	0	1	1
GO:0032966_negative_regulation_of_collagen_biosynthetic_process	17	0	0	1	1
GO:0032967_positive_regulation_of_collagen_biosynthetic_process	26	0	0	1	1
GO:0032968_positive_regulation_of_transcription_elongation_from_RNA_polymerase_II_promoter	13	0	0	1	1
GO:0032981_mitochondrial_respiratory_chain_complex_I_assembly	65	0	0	1	1
GO:0033077_T_cell_differentiation_in_thymus	31	0	0	1	1
GO:0033120_positive_regulation_of_RNA_splicing	14	0	0	1	1
GO:0033138_positive_regulation_of_peptidyl-serine_phosphorylation	90	0	0	1	1
GO:0033141_positive_regulation_of_peptidyl-serine_phosphorylation_of_STAT_protein	20	0	0	1	1
GO:0033146_regulation_of_intracellular_estrogen_receptor_signaling_pathway	15	0	0	1	1
GO:0033148_positive_regulation_of_intracellular_estrogen_receptor_signaling_pathway	11	0	0	1	1
GO:0033151_V(D)J_recombination	8	0	0	1	1
GO:0033173_calcineurin-NFAT_signaling_cascade	12	0	0	1	1
GO:0033189_response_to_vitamin_A	19	0	0	1	1
GO:0033198_response_to_ATP	18	0	0	1	1
GO:0033210_leptin-mediated_signaling_pathway	8	0	0	1	1
GO:0033234_negative_regulation_of_protein_sumoylation	12	0	0	1	1
GO:0033235_positive_regulation_of_protein_sumoylation	12	0	0	1	1
GO:0033327_Leydig_cell_differentiation	11	0	0	1	1
GO:0033365_protein_localization_to_organelle	18	0	0	1	1
GO:0033539_fatty_acid_beta-oxidation_using_acyl-CoA_dehydrogenase	10	0	0	1	1
GO:0033540_fatty_acid_beta-oxidation_using_acyl-CoA_oxidase	15	0	0	1	1
GO:0033572_transferrin_transport	36	0	0	1	1
GO:0033574_response_to_testosterone	31	0	0	1	1
GO:0033617_mitochondrial_cytochrome_c_oxidase_assembly	22	0	0	1	1
GO:0033619_membrane_protein_proteolysis	12	0	0	1	1
GO:0033622_integrin_activation	9	0	0	1	1
GO:0033627_cell_adhesion_mediated_by_integrin	21	0	0	1	1
GO:0033628_regulation_of_cell_adhesion_mediated_by_integrin	13	0	0	1	1
GO:0033630_positive_regulation_of_cell_adhesion_mediated_by_integrin	15	0	0	1	1
GO:0033673_negative_regulation_of_kinase_activity	13	0	0	1	1
GO:0033674_positive_regulation_of_kinase_activity	72	1.39	3.79	0.236275	1	DSTYK
GO:0033683_nucleotide-excision_repair,_DNA_incision	38	0	0	1	1
GO:0033690_positive_regulation_of_osteoblast_proliferation	12	0	0	1	1
GO:0033962_P-body_assembly	13	0	0	1	1
GO:0034058_endosomal_vesicle_fusion	8	0	0	1	1
GO:0034063_stress_granule_assembly	20	0	0	1	1
GO:0034067_protein_localization_to_Golgi_apparatus	21	0	0	1	1
GO:0034113_heterotypic_cell-cell_adhesion	29	0	0	1	1
GO:0034115_negative_regulation_of_heterotypic_cell-cell_adhesion	11	0	0	1	1
GO:0034116_positive_regulation_of_heterotypic_cell-cell_adhesion	16	0	0	1	1
GO:0034122_negative_regulation_of_toll-like_receptor_signaling_pathway	17	0	0	1	1
GO:0034138_toll-like_receptor_3_signaling_pathway	11	0	0	1	1
GO:0034142_toll-like_receptor_4_signaling_pathway	17	0	0	1	1
GO:0034144_negative_regulation_of_toll-like_receptor_4_signaling_pathway	13	0	0	1	1
GO:0034162_toll-like_receptor_9_signaling_pathway	16	0	0	1	1
GO:0034199_activation_of_protein_kinase_A_activity	18	0	0	1	1
GO:0034220_ion_transmembrane_transport	209	0.48	1.29	0.54363	1	ATP1B2
GO:0034244_negative_regulation_of_transcription_elongation_from_RNA_polymerase_II_promoter	13	0	0	1	1
GO:0034260_negative_regulation_of_GTPase_activity	49	0	0	1	1
GO:0034314_Arp2/3_complex-mediated_actin_nucleation	19	0	0	1	1
GO:0034329_cell_junction_assembly	18	0	0	1	1
GO:0034341_response_to_interferon-gamma	23	0	0	1	1
GO:0034356_NAD_biosynthesis_via_nicotinamide_riboside_salvage_pathway	14	0	0	1	1
GO:0034371_chylomicron_remodeling	9	0	0	1	1
GO:0034372_very-low-density_lipoprotein_particle_remodeling	9	0	0	1	1
GO:0034378_chylomicron_assembly	11	0	0	1	1
GO:0034379_very-low-density_lipoprotein_particle_assembly	13	0	0	1	1
GO:0034380_high-density_lipoprotein_particle_assembly	13	0	0	1	1
GO:0034382_chylomicron_remnant_clearance	8	0	0	1	1
GO:0034383_low-density_lipoprotein_particle_clearance	24	0	0	1	1
GO:0034384_high-density_lipoprotein_particle_clearance	10	0	0	1	1
GO:0034389_lipid_droplet_organization	20	0	0	1	1
GO:0034394_protein_localization_to_cell_surface	27	0	0	1	1
GO:0034446_substrate_adhesion-dependent_cell_spreading	56	0	0	1	1
GO:0034453_microtubule_anchoring	15	0	0	1	1
GO:0034454_microtubule_anchoring_at_centrosome	10	0	0	1	1
GO:0034472_snRNA_3'-end_processing	19	0	0	1	1
GO:0034497_protein_localization_to_phagophore_assembly_site	12	0	0	1	1
GO:0034501_protein_localization_to_kinetochore	11	0	0	1	1
GO:0034504_protein_localization_to_nucleus	34	0	0	1	1
GO:0034551_mitochondrial_respiratory_chain_complex_III_assembly	10	0	0	1	1
GO:0034587_piRNA_metabolic_process	15	0	0	1	1
GO:0034605_cellular_response_to_heat	51	0	0	1	1
GO:0034612_response_to_tumor_necrosis_factor	31	0	0	1	1
GO:0034613_cellular_protein_localization	60	0	0	1	1
GO:0034614_cellular_response_to_reactive_oxygen_species	36	0	0	1	1
GO:0034620_cellular_response_to_unfolded_protein	26	0	0	1	1
GO:0034622_cellular_protein-containing_complex_assembly	22	0	0	1	1
GO:0034626_fatty_acid_elongation,_polyunsaturated_fatty_acid	7	0	0	1	1
GO:0034638_phosphatidylcholine_catabolic_process	12	0	0	1	1
GO:0034644_cellular_response_to_UV	51	0	0	1	1
GO:0034656_nucleobase-containing_small_molecule_catabolic_process	15	0	0	1	1
GO:0034720_histone_H3-K4_demethylation	8	0	0	1	1
GO:0034765_regulation_of_ion_transmembrane_transport	113	0	0	1	1
GO:0034968_histone_lysine_methylation	13	0	0	1	1
GO:0034976_response_to_endoplasmic_reticulum_stress	75	1.33	3.63	0.244816	1	EIF2AK3
GO:0035019_somatic_stem_cell_population_maintenance	63	1.59	4.34	0.210073	1	SFRP1
GO:0035023_regulation_of_Rho_protein_signal_transduction	28	0	0	1	1
GO:0035024_negative_regulation_of_Rho_protein_signal_transduction	22	0	0	1	1
GO:0035025_positive_regulation_of_Rho_protein_signal_transduction	33	0	0	1	1
GO:0035036_sperm-egg_recognition	18	0	0	1	1
GO:0035050_embryonic_heart_tube_development	16	0	0	1	1
GO:0035082_axoneme_assembly	21	0	0	1	1
GO:0035094_response_to_nicotine	32	0	0	1	1
GO:0035108_limb_morphogenesis	14	0	0	1	1
GO:0035115_embryonic_forelimb_morphogenesis	33	0	0	1	1
GO:0035116_embryonic_hindlimb_morphogenesis	29	0	0	1	1
GO:0035148_tube_formation	11	0	0	1	1
GO:0035176_social_behavior	51	0	0	1	1
GO:0035195_gene_silencing_by_miRNA	573	0	0	1	1
GO:0035196_production_of_miRNAs_involved_in_gene_silencing_by_miRNA	14	0	0	1	1
GO:0035235_ionotropic_glutamate_receptor_signaling_pathway	23	0	0	1	1
GO:0035249_synaptic_transmission,_glutamatergic	28	0	0	1	1
GO:0035264_multicellular_organism_growth	85	0	0	1	1
GO:0035269_protein_O-linked_mannosylation	19	0	0	1	1
GO:0035278_miRNA_mediated_inhibition_of_translation	96	0	0	1	1
GO:0035307_positive_regulation_of_protein_dephosphorylation	26	0	0	1	1
GO:0035329_hippo_signaling	27	0	0	1	1
GO:0035331_negative_regulation_of_hippo_signaling	11	0	0	1	1
GO:0035335_peptidyl-tyrosine_dephosphorylation	99	1.01	2.74	0.309828	1	PTPN21
GO:0035338_long-chain_fatty-acyl-CoA_biosynthetic_process	19	0	0	1	1
GO:0035372_protein_localization_to_microtubule	10	0	0	1	1
GO:0035418_protein_localization_to_synapse	12	0	0	1	1
GO:0035455_response_to_interferon-alpha	10	0	0	1	1
GO:0035456_response_to_interferon-beta	10	0	0	1	1
GO:0035457_cellular_response_to_interferon-alpha	11	0	0	1	1
GO:0035458_cellular_response_to_interferon-beta	22	0	0	1	1
GO:0035459_vesicle_cargo_loading	12	0	0	1	1
GO:0035493_SNARE_complex_assembly	11	0	0	1	1
GO:0035518_histone_H2A_monoubiquitination	12	0	0	1	1
GO:0035563_positive_regulation_of_chromatin_binding	13	0	0	1	1
GO:0035584_calcium-mediated_signaling_using_intracellular_calcium_source	22	0	0	1	1
GO:0035589_G_protein-coupled_purinergic_nucleotide_receptor_signaling_pathway	14	0	0	1	1
GO:0035640_exploration_behavior	14	0	0	1	1
GO:0035641_locomotory_exploration_behavior	13	0	0	1	1
GO:0035655_interleukin-18-mediated_signaling_pathway	7	0	0	1	1
GO:0035666_TRIF-dependent_toll-like_receptor_signaling_pathway	30	0	0	1	1
GO:0035690_cellular_response_to_drug	67	1.49	4.08	0.221826	1	MEF2C
GO:0035721_intraciliary_retrograde_transport	10	0	0	1	1
GO:0035722_interleukin-12-mediated_signaling_pathway	47	0	0	1	1
GO:0035723_interleukin-15-mediated_signaling_pathway	13	0	0	1	1
GO:0035725_sodium_ion_transmembrane_transport	99	1.01	2.74	0.309828	1	SLC20A2
GO:0035729_cellular_response_to_hepatocyte_growth_factor_stimulus	16	0	0	1	1
GO:0035774_positive_regulation_of_insulin_secretion_involved_in_cellular_response_to_glucose_stimulus	34	0	0	1	1
GO:0035810_positive_regulation_of_urine_volume	14	0	0	1	1
GO:0035815_positive_regulation_of_renal_sodium_excretion	14	0	0	1	1
GO:0035845_photoreceptor_cell_outer_segment_organization	12	0	0	1	1
GO:0035855_megakaryocyte_development	17	0	0	1	1
GO:0035865_cellular_response_to_potassium_ion	11	0	0	1	1
GO:0035871_protein_K11-linked_deubiquitination	10	0	0	1	1
GO:0035902_response_to_immobilization_stress	22	0	0	1	1
GO:0035904_aorta_development	22	0	0	1	1
GO:0035909_aorta_morphogenesis	14	0	0	1	1
GO:0035965_cardiolipin_acyl-chain_remodeling	8	0	0	1	1
GO:0035970_peptidyl-threonine_dephosphorylation	22	0	0	1	1
GO:0035988_chondrocyte_proliferation	10	0	0	1	1
GO:0035994_response_to_muscle_stretch	15	0	0	1	1
GO:0035999_tetrahydrofolate_interconversion	10	0	0	1	1
GO:0036010_protein_localization_to_endosome	10	0	0	1	1
GO:0036065_fucosylation	11	0	0	1	1
GO:0036092_phosphatidylinositol-3-phosphate_biosynthetic_process	14	0	0	1	1
GO:0036109_alpha-linolenic_acid_metabolic_process	13	0	0	1	1
GO:0036120_cellular_response_to_platelet-derived_growth_factor_stimulus	22	0	0	1	1
GO:0036148_phosphatidylglycerol_acyl-chain_remodeling	18	0	0	1	1
GO:0036149_phosphatidylinositol_acyl-chain_remodeling	18	0	0	1	1
GO:0036150_phosphatidylserine_acyl-chain_remodeling	21	0	0	1	1
GO:0036151_phosphatidylcholine_acyl-chain_remodeling	29	0	0	1	1
GO:0036152_phosphatidylethanolamine_acyl-chain_remodeling	26	0	0	1	1
GO:0036158_outer_dynein_arm_assembly	19	0	0	1	1
GO:0036159_inner_dynein_arm_assembly	15	0	0	1	1
GO:0036258_multivesicular_body_assembly	30	0	0	1	1
GO:0036297_interstrand_cross-link_repair	52	0	0	1	1
GO:0036342_post-anal_tail_morphogenesis	19	0	0	1	1
GO:0036353_histone_H2A-K119_monoubiquitination	8	0	0	1	1
GO:0036444_calcium_import_into_the_mitochondrion	11	0	0	1	1
GO:0036498_IRE1-mediated_unfolded_protein_response	56	0	0	1	1
GO:0036503_ERAD_pathway	16	0	0	1	1
GO:0038003_opioid_receptor_signaling_pathway	10	0	0	1	1
GO:0038061_NIK/NF-kappaB_signaling	70	0	0	1	1
GO:0038063_collagen-activated_tyrosine_kinase_receptor_signaling_pathway	12	0	0	1	1
GO:0038083_peptidyl-tyrosine_autophosphorylation	36	0	0	1	1
GO:0038084_vascular_endothelial_growth_factor_signaling_pathway	15	0	0	1	1
GO:0038095_Fc-epsilon_receptor_signaling_pathway	110	0	0	1	1
GO:0038096_Fc-gamma_receptor_signaling_pathway_involved_in_phagocytosis	71	0	0	1	1
GO:0038110_interleukin-2-mediated_signaling_pathway	11	0	0	1	1
GO:0038111_interleukin-7-mediated_signaling_pathway	30	0	0	1	1
GO:0038180_nerve_growth_factor_signaling_pathway	12	0	0	1	1
GO:0038202_TORC1_signaling	8	0	0	1	1
GO:0039702_viral_budding_via_host_ESCRT_complex	20	0	0	1	1
GO:0040008_regulation_of_growth	62	0	0	1	1
GO:0040014_regulation_of_multicellular_organism_growth	27	0	0	1	1
GO:0040015_negative_regulation_of_multicellular_organism_growth	11	0	0	1	1
GO:0040019_positive_regulation_of_embryonic_development	11	0	0	1	1
GO:0040029_regulation_of_gene_expression,_epigenetic	14	0	0	1	1
GO:0040037_negative_regulation_of_fibroblast_growth_factor_receptor_signaling_pathway	24	0	0	1	1
GO:0042026_protein_refolding	19	0	0	1	1
GO:0042058_regulation_of_epidermal_growth_factor_receptor_signaling_pathway	11	0	0	1	1
GO:0042098_T_cell_proliferation	22	0	0	1	1
GO:0042104_positive_regulation_of_activated_T_cell_proliferation	26	0	0	1	1
GO:0042110_T_cell_activation	44	0	0	1	1
GO:0042113_B_cell_activation	33	0	0	1	1
GO:0042116_macrophage_activation	13	0	0	1	1
GO:0042119_neutrophil_activation	12	0	0	1	1
GO:0042129_regulation_of_T_cell_proliferation	10	0	0	1	1
GO:0042136_neurotransmitter_biosynthetic_process	12	0	0	1	1
GO:0042147_retrograde_transport,_endosome_to_Golgi	77	0	0	1	1
GO:0042157_lipoprotein_metabolic_process	20	0	0	1	1
GO:0042167_heme_catabolic_process	7	0	0	1	1
GO:0042177_negative_regulation_of_protein_catabolic_process	35	0	0	1	1
GO:0042246_tissue_regeneration	23	0	0	1	1
GO:0042254_ribosome_biogenesis	27	0	0	1	1
GO:0042267_natural_killer_cell_mediated_cytotoxicity	19	0	0	1	1
GO:0042273_ribosomal_large_subunit_biogenesis	27	0	0	1	1
GO:0042274_ribosomal_small_subunit_biogenesis	18	0	0	1	1
GO:0042276_error-prone_translesion_synthesis	21	0	0	1	1
GO:0042307_positive_regulation_of_protein_import_into_nucleus	40	0	0	1	1
GO:0042308_negative_regulation_of_protein_import_into_nucleus	13	0	0	1	1
GO:0042310_vasoconstriction	16	0	0	1	1
GO:0042311_vasodilation	20	0	0	1	1
GO:0042325_regulation_of_phosphorylation	14	0	0	1	1
GO:0042326_negative_regulation_of_phosphorylation	16	0	0	1	1
GO:0042327_positive_regulation_of_phosphorylation	26	0	0	1	1
GO:0042340_keratan_sulfate_catabolic_process	12	0	0	1	1
GO:0042359_vitamin_D_metabolic_process	12	0	0	1	1
GO:0042391_regulation_of_membrane_potential	99	0	0	1	1
GO:0042403_thyroid_hormone_metabolic_process	8	0	0	1	1
GO:0042407_cristae_formation	32	0	0	1	1
GO:0042417_dopamine_metabolic_process	13	0	0	1	1
GO:0042438_melanin_biosynthetic_process	13	0	0	1	1
GO:0042445_hormone_metabolic_process	14	0	0	1	1
GO:0042446_hormone_biosynthetic_process	12	0	0	1	1
GO:0042448_progesterone_metabolic_process	10	0	0	1	1
GO:0042462_eye_photoreceptor_cell_development	18	0	0	1	1
GO:0042472_inner_ear_morphogenesis	57	1.75	4.8	0.192112	1	COL11A1
GO:0042474_middle_ear_morphogenesis	20	0	0	1	1
GO:0042476_odontogenesis	33	0	0	1	1
GO:0042531_positive_regulation_of_tyrosine_phosphorylation_of_STAT_protein	71	0	0	1	1
GO:0042532_negative_regulation_of_tyrosine_phosphorylation_of_STAT_protein	16	0	0	1	1
GO:0042551_neuron_maturation	14	0	0	1	1
GO:0042552_myelination	48	0	0	1	1
GO:0042554_superoxide_anion_generation	16	0	0	1	1
GO:0042572_retinol_metabolic_process	47	0	0	1	1
GO:0042573_retinoic_acid_metabolic_process	25	0	0	1	1
GO:0042574_retinal_metabolic_process	15	0	0	1	1
GO:0042592_homeostatic_process	11	0	0	1	1
GO:0042593_glucose_homeostasis	115	0	0	1	1
GO:0042594_response_to_starvation	41	0	0	1	1
GO:0042632_cholesterol_homeostasis	101	0.99	2.69	0.314989	1	ABCG1
GO:0042633_hair_cycle	14	0	0	1	1
GO:0042692_muscle_cell_differentiation	13	0	0	1	1
GO:0042733_embryonic_digit_morphogenesis	55	0	0	1	1
GO:0042738_exogenous_drug_catabolic_process	24	0	0	1	1
GO:0042742_defense_response_to_bacterium	128	0	0	1	1
GO:0042752_regulation_of_circadian_rhythm	65	0	0	1	1
GO:0042754_negative_regulation_of_circadian_rhythm	10	0	0	1	1
GO:0042755_eating_behavior	23	0	0	1	1
GO:0042759_long-chain_fatty_acid_biosynthetic_process	26	0	0	1	1
GO:0042760_very_long-chain_fatty_acid_catabolic_process	6	0	0	1	1
GO:0042761_very_long-chain_fatty_acid_biosynthetic_process	13	0	0	1	1
GO:0042769_DNA_damage_response,_detection_of_DNA_damage	37	0	0	1	1
GO:0042770_signal_transduction_in_response_to_DNA_damage	12	0	0	1	1
GO:0042771_intrinsic_apoptotic_signaling_pathway_in_response_to_DNA_damage_by_p53_class_mediator	29	0	0	1	1
GO:0042776_mitochondrial_ATP_synthesis_coupled_proton_transport	21	0	0	1	1
GO:0042789_mRNA_transcription_by_RNA_polymerase_II	11	0	0	1	1
GO:0042795_snRNA_transcription_by_RNA_polymerase_II	70	0	0	1	1
GO:0042832_defense_response_to_protozoan	26	0	0	1	1
GO:0042908_xenobiotic_transport	19	0	0	1	1
GO:0042953_lipoprotein_transport	14	0	0	1	1
GO:0042982_amyloid_precursor_protein_metabolic_process	11	0	0	1	1
GO:0042985_negative_regulation_of_amyloid_precursor_protein_biosynthetic_process	11	0	0	1	1
GO:0042989_sequestering_of_actin_monomers	10	0	0	1	1
GO:0043010_camera-type_eye_development	42	0	0	1	1
GO:0043029_T_cell_homeostasis	28	0	0	1	1
GO:0043031_negative_regulation_of_macrophage_activation	10	0	0	1	1
GO:0043032_positive_regulation_of_macrophage_activation	18	0	0	1	1
GO:0043044_ATP-dependent_chromatin_remodeling	34	0	0	1	1
GO:0043046_DNA_methylation_involved_in_gamete_generation	20	0	0	1	1
GO:0043065_positive_regulation_of_apoptotic_process	355	0.56	1.52	0.382896	1	MELK;SFRP1
GO:0043068_positive_regulation_of_programmed_cell_death	10	0	0	1	1
GO:0043069_negative_regulation_of_programmed_cell_death	15	0	0	1	1
GO:0043085_positive_regulation_of_catalytic_activity	82	0	0	1	1
GO:0043086_negative_regulation_of_catalytic_activity	52	0	0	1	1
GO:0043087_regulation_of_GTPase_activity	71	0	0	1	1
GO:0043097_pyrimidine_nucleoside_salvage	11	0	0	1	1
GO:0043113_receptor_clustering	26	0	0	1	1
GO:0043114_regulation_of_vascular_permeability	12	0	0	1	1
GO:0043116_negative_regulation_of_vascular_permeability	14	0	0	1	1
GO:0043117_positive_regulation_of_vascular_permeability	11	0	0	1	1
GO:0043122_regulation_of_I-kappaB_kinase/NF-kappaB_signaling	29	0	0	1	1
GO:0043124_negative_regulation_of_I-kappaB_kinase/NF-kappaB_signaling	51	0	0	1	1
GO:0043149_stress_fiber_assembly	16	0	0	1	1
GO:0043153_entrainment_of_circadian_clock_by_photoperiod	29	0	0	1	1
GO:0043161_proteasome-mediated_ubiquitin-dependent_protein_catabolic_process	181	0.55	1.49	0.492876	1	ARNTL
GO:0043162_ubiquitin-dependent_protein_catabolic_process_via_the_multivesicular_body_sorting_pathway	19	0	0	1	1
GO:0043171_peptide_catabolic_process	16	0	0	1	1
GO:0043200_response_to_amino_acid	31	0	0	1	1
GO:0043248_proteasome_assembly	9	0	0	1	1
GO:0043249_erythrocyte_maturation	15	0	0	1	1
GO:0043252_sodium-independent_organic_anion_transport	16	0	0	1	1
GO:0043254_regulation_of_protein-containing_complex_assembly	19	0	0	1	1
GO:0043276_anoikis	11	0	0	1	1
GO:0043277_apoptotic_cell_clearance	21	0	0	1	1
GO:0043280_positive_regulation_of_cysteine-type_endopeptidase_activity_involved_in_apoptotic_process	55	0	0	1	1
GO:0043303_mast_cell_degranulation	14	0	0	1	1
GO:0043304_regulation_of_mast_cell_degranulation	10	0	0	1	1
GO:0043306_positive_regulation_of_mast_cell_degranulation	11	0	0	1	1
GO:0043330_response_to_exogenous_dsRNA	32	0	0	1	1
GO:0043388_positive_regulation_of_DNA_binding	30	0	0	1	1
GO:0043393_regulation_of_protein_binding	23	0	0	1	1
GO:0043403_skeletal_muscle_tissue_regeneration	18	0	0	1	1
GO:0043405_regulation_of_MAP_kinase_activity	10	0	0	1	1
GO:0043406_positive_regulation_of_MAP_kinase_activity	59	0	0	1	1
GO:0043407_negative_regulation_of_MAP_kinase_activity	41	0	0	1	1
GO:0043408_regulation_of_MAPK_cascade	23	0	0	1	1
GO:0043409_negative_regulation_of_MAPK_cascade	25	0	0	1	1
GO:0043410_positive_regulation_of_MAPK_cascade	111	0.9	2.44	0.340225	1	CDH2
GO:0043433_negative_regulation_of_DNA-binding_transcription_factor_activity	83	1.2	3.28	0.267134	1	SMAD7
GO:0043473_pigmentation	26	0	0	1	1
GO:0043484_regulation_of_RNA_splicing	42	0	0	1	1
GO:0043486_histone_exchange	10	0	0	1	1
GO:0043488_regulation_of_mRNA_stability	113	0	0	1	1
GO:0043491_protein_kinase_B_signaling	38	0	0	1	1
GO:0043507_positive_regulation_of_JUN_kinase_activity	36	0	0	1	1
GO:0043517_positive_regulation_of_DNA_damage_response,_signal_transduction_by_p53_class_mediator	12	0	0	1	1
GO:0043524_negative_regulation_of_neuron_apoptotic_process	141	0.71	1.92	0.410539	1	MEF2C
GO:0043525_positive_regulation_of_neuron_apoptotic_process	55	0	0	1	1
GO:0043536_positive_regulation_of_blood_vessel_endothelial_cell_migration	49	0	0	1	1
GO:0043542_endothelial_cell_migration	30	0	0	1	1
GO:0043551_regulation_of_phosphatidylinositol_3-kinase_activity	19	0	0	1	1
GO:0043552_positive_regulation_of_phosphatidylinositol_3-kinase_activity	31	0	0	1	1
GO:0043568_positive_regulation_of_insulin-like_growth_factor_receptor_signaling_pathway	13	0	0	1	1
GO:0043588_skin_development	35	0	0	1	1
GO:0043589_skin_morphogenesis	11	0	0	1	1
GO:0043647_inositol_phosphate_metabolic_process	47	0	0	1	1
GO:0043651_linoleic_acid_metabolic_process	21	0	0	1	1
GO:0043652_engulfment_of_apoptotic_cell	15	0	0	1	1
GO:0043653_mitochondrial_fragmentation_involved_in_apoptotic_process	9	0	0	1	1
GO:0043666_regulation_of_phosphoprotein_phosphatase_activity	43	0	0	1	1
GO:0043922_negative_regulation_by_host_of_viral_transcription	12	0	0	1	1
GO:0043928_exonucleolytic_catabolism_of_deadenylated_mRNA	33	0	0	1	1
GO:0043950_positive_regulation_of_cAMP-mediated_signaling	15	0	0	1	1
GO:0043951_negative_regulation_of_cAMP-mediated_signaling	15	0	0	1	1
GO:0043968_histone_H2A_acetylation	16	0	0	1	1
GO:0043981_histone_H4-K5_acetylation	16	0	0	1	1
GO:0043982_histone_H4-K8_acetylation	16	0	0	1	1
GO:0043984_histone_H4-K16_acetylation	15	0	0	1	1
GO:0044154_histone_H3-K14_acetylation	8	0	0	1	1
GO:0044255_cellular_lipid_metabolic_process	15	0	0	1	1
GO:0044257_cellular_protein_catabolic_process	16	0	0	1	1
GO:0044539_long-chain_fatty_acid_import_into_cell	8	0	0	1	1
GO:0044597_daunorubicin_metabolic_process	9	0	0	1	1
GO:0044598_doxorubicin_metabolic_process	9	0	0	1	1
GO:0044772_mitotic_cell_cycle_phase_transition	22	0	0	1	1
GO:0044782_cilium_organization	20	0	0	1	1
GO:0044806_G-quadruplex_DNA_unwinding	7	0	0	1	1
GO:0044849_estrous_cycle	15	0	0	1	1
GO:0045010_actin_nucleation	11	0	0	1	1
GO:0045019_negative_regulation_of_nitric_oxide_biosynthetic_process	20	0	0	1	1
GO:0045022_early_endosome_to_late_endosome_transport	22	0	0	1	1
GO:0045039_protein_insertion_into_mitochondrial_inner_membrane	8	0	0	1	1
[truncated: 907 more rows]

## Sheet: CC_8hrs - ORA_Tt8_vs_NIt8-CC_al
ORA_Tt8_vs_NIt8-CC_all
geneset	NGenes	pctDE	OR	pvalue	FDR	external_gene_name.DE
GO:0005576_extracellular_region	1802	1.22	3.95	6.39984e-07	0.000201595	S1PR3;HBEGF;PRSS35;TNFRSF11B;TGFA;SPP1;PGM2;FST;ANXA1;PLAT;IL1RAP;ARSJ;FIBIN;COL11A1;CALCB;SFRP1;CDCP1;PRDX6;CEMIP;LAMA4;PTX3;CRISPLD2
GO:0005886_plasma_membrane	4416	0.84	2.99	5.99272e-07	0.000201595	S1PR3;HBEGF;TNFRSF11B;GLIPR1;TGFA;RGS4;TNFRSF19;SLC20A2;SECTM1;ANXA1;SYTL2;MELK;SYNJ2;ABCG1;IL1RAP;EZR;CLDN1;UAP1;TGFBR2;ABCG4;RAB31;NT5E;HIF3A;PALLD;SMAD7;PDPN;SFRP1;CDCP1;EVA1A;CDH2;ATP1B2;CEMIP;DNAJC1;EMP1;CD274;BRCA1;DSC2
GO:0016323_basolateral_plasma_membrane	215	3.26	9.58	1.65184e-05	0.00346887	TGFA;ANXA1;EZR;CLDN1;DSTYK;PDPN;CDH2
GO:0005912_adherens_junction	157	3.82	11.22	2.78225e-05	0.00438204	ANXA1;SMAD7;CNN3;CDH2;PDLIM3;DSC2
GO:0070062_extracellular_exosome	2130	0.94	2.91	0.00010229	0.0128886	CRYAB;SLC20A2;KRT75;SECTM1;SPP1;PGM2;ANXA1;PLAT;EZR;TXNRD1;NT5E;TPM4;SFRP1;RSU1;PRDX6;LAMA4;CRISPLD2;PTTG1IP;CD274;DSC2
GO:0005788_endoplasmic_reticulum_lumen	299	2.34	6.8	0.000132521	0.0139147	SPP1;COLGALT2;ARSJ;COL11A1;EVA1A;CDH2;P3H2
GO:0005884_actin_filament	86	4.65	13.52	0.00030662	0.0273743	ANXA1;EZR;PALLD;TPM4
GO:0009986_cell_surface	595	1.51	4.41	0.000391062	0.0273743	HBEGF;CRYAB;TGFA;ANXA1;PLAT;NT5E;SFRP1;CDH2;CD274
GO:0016324_apical_plasma_membrane	353	1.98	5.73	0.000363802	0.0273743	ANXA1;EZR;CLDN1;DSTYK;PDPN;CDH2;ATP1B2
GO:0005615_extracellular_space	1724	0.93	2.79	0.000631225	0.0359653	HBEGF;TNFRSF11B;GLIPR1;TGFA;SECTM1;SPP1;FST;ANXA1;PLAT;EZR;COL11A1;CALCB;SFRP1;PRDX6;PTX3;CRISPLD2
GO:0005737_cytoplasm	4690	0.66	2.13	0.000685054	0.0359653	S1PR3;CRYAB;RGS4;FST;ANXA1;SYTL2;MELK;BTG3;PLAT;EZR;TXNRD1;CLDN1;RNF128;MEF2C;CHODL;LRRC2;SMAD7;GINS4;DSTYK;NEIL1;EIF2AK3;PTPN21;CDH2;ATP1B2;PRDX6;CEMIP;LEF1;PTTG1IP;HAP1;WEE1;BRCA1
GO:0071437_invadopodium	10	20	67.95	0.00060844	0.0359653	EZR;PDPN
GO:0005654_nucleoplasm	3680	0.71	2.22	0.000807617	0.0372102	CRYAB;GRHL3;SEL1L3;ANXA1;MCM4;ARNTL;TXNRD1;UAP1;CENPW;MEF2C;MCM6;HR;NT5E;HIF3A;SMAD7;GINS4;CLSPN;NEIL1;POLA1;P3H2;PRIM1;LEF1;PTTG1IP;MCM10;WEE1;BRCA1
GO:0005925_focal_adhesion	415	1.69	4.85	0.000945022	0.0372102	ANXA1;EZR;PALLD;TPM4;CNN3;CDH2;RSU1
GO:0042555_MCM_complex	12	16.67	54.34	0.000888043	0.0372102	MCM4;MCM6
GO:0097449_astrocyte_projection	12	16.67	54.34	0.000888043	0.0372102	EZR;ATP1B2
GO:0030665_clathrin-coated_vesicle_membrane	56	5.36	15.54	0.00121092	0.0448751	HBEGF;TGFA;CEMIP
GO:0042995_cell_projection	127	3.15	9	0.00132803	0.046481	SPP1;SYNJ2;EZR;PDPN
GO:0016328_lateral_plasma_membrane	65	4.62	13.28	0.00186239	0.0617529	ANXA1;CLDN1;ATP1B2
GO:0001725_stress_fiber	68	4.41	12.66	0.00211961	0.0667679	PALLD;TPM4;PDLIM3
GO:0015629_actin_cytoskeleton	245	2.04	5.8	0.00228108	0.0684324	ARSJ;EZR;PALLD;CNN3;HAP1
GO:0031901_early_endosome_membrane	158	2.53	7.18	0.00294155	0.0772156	LDLRAD4;ANXA1;RAB31;CD274
GO:0032991_protein-containing_complex	644	1.24	3.56	0.00285694	0.0772156	CRYAB;RGS4;ANXA1;EZR;CLDN1;MEF2C;SMAD7;BRCA1
GO:0045177_apical_part_of_cell	76	3.95	11.28	0.00290999	0.0772156	PLAT;EZR;CDH2
GO:0005794_Golgi_apparatus	1002	1	2.88	0.00423822	0.0988918	CRYAB;SECTM1;SPP1;ABCG1;RNF128;FIBIN;IFT57;CLSPN;P3H2;DNMBP
GO:0005856_cytoskeleton	406	1.48	4.2	0.00420381	0.0988918	SYNJ2;RNF128;TPM4;PTPN21;DNMBP;HAP1
GO:0031528_microvillus_membrane	26	7.69	22.68	0.00422668	0.0988918	EZR;PDPN
GO:0001891_phagocytic_cup	27	7.41	21.75	0.00455375	0.100186	ANXA1;RAB31
GO:0016020_membrane	2109	0.76	2.24	0.00492978	0.100186	GLIPR1;SLC20A2;SYTL2;MCM4;MELK;IL1RAP;EZR;NT5E;TPM4;PDPN;EIF2AK3;ATP1B2;PRDX6;DNAJC1;PRIM1;PTTG1IP
GO:0048471_perinuclear_region_of_cytoplasm	702	1.14	3.26	0.00479493	0.100186	TGFA;SPP1;SYNJ2;EZR;RNF128;CHODL;EIF2AK3;PRDX6
GO:0097060_synaptic_membrane	28	7.14	20.92	0.00489217	0.100186	CRYAB;ANXA1
GO:0001726_ruffle	98	3.06	8.66	0.00593496	0.11406	EZR;PALLD;PDPN
GO:0016342_catenin_complex	31	6.45	18.76	0.00597456	0.11406	SMAD7;CDH2
GO:0044853_plasma_membrane_raft	32	6.25	18.13	0.00635745	0.1178	EZR;CDH2
GO:0001533_cornified_envelope	45	4.44	12.64	0.0122968	0.212549	ANXA1;DSC2
GO:0001650_fibrillar_center	129	2.33	6.52	0.0125542	0.212549	EZR;TXNRD1;SMAD7
GO:0014704_intercalated_disc	46	4.35	12.36	0.0128248	0.212549	CDH2;DSC2
GO:0030018_Z_disc	128	2.34	6.57	0.012295	0.212549	CRYAB;PALLD;PDLIM3
GO:0031012_extracellular_matrix	245	1.63	4.57	0.0134952	0.212549	TNFRSF11B;COL11A1;PTX3;CRISPLD2
GO:0062023_collagen-containing_extracellular_matrix	374	1.34	3.76	0.0131897	0.212549	ANXA1;COL11A1;SFRP1;CDH2;LAMA4
GO:0071944_cell_periphery	51	3.92	11.09	0.0156095	0.239853	EZR;ATP1B2
GO:0016021_integral_component_of_membrane	3570	0.59	1.73	0.021798	0.32697	GLIPR1;LDLRAD4;TGFA;TNFRSF19;SECTM1;SEL1L3;ABCG1;ILDR2;CLDN1;TGFBR2;RNF128;CHODL;ABCG4;CDCP1;EVA1A;C3orf52;DNAJC1;EMP1;PTTG1IP;CD274;DSC2
GO:0031410_cytoplasmic_vesicle	289	1.38	3.86	0.0231924	0.332073	TGFA;PDPN;HAP1;DSC2
GO:0043197_dendritic_spine	162	1.85	5.16	0.0228863	0.332073	CRYAB;CNN3;HAP1
GO:0005789_endoplasmic_reticulum_membrane	944	0.85	2.39	0.0249651	0.349511	TGFA;ABCG1;ILDR2;CHODL;EVA1A;EIF2AK3;C3orf52;DNAJC1
GO:0009897_external_side_of_plasma_membrane	303	1.32	3.68	0.0269783	0.361624	ABCG1;TGFBR2;ATP1B2;CD274
GO:0019898_extrinsic_component_of_membrane	68	2.94	8.23	0.0267731	0.361624	ANXA1;EZR
GO:0008274_gamma-tubulin_ring_complex	8	12.5	38.47	0.0294709	0.374902	BRCA1
GO:0030175_filopodium	72	2.78	7.76	0.0297541	0.374902	EZR;PDPN
GO:0070531_BRCA1-A_complex	8	12.5	38.47	0.0294709	0.374902	BRCA1
GO:0030027_lamellipodium	185	1.62	4.51	0.0321478	0.39712	PALLD;PDPN;CDH2
GO:0005911_cell-cell_junction	187	1.6	4.46	0.0330329	0.400206	CDH2;DNMBP;DSC2
GO:0005829_cytosol	5138	0.53	1.56	0.0350353	0.411843	CRYAB;RGS4;KRT75;PGM2;ANXA1;SYNJ2;EZR;TXNRD1;UAP1;PDE1C;TGFBR2;RNF128;RAB31;NT5E;GMPR;HIF3A;PALLD;TPM4;SMAD7;PDPN;SFRP1;CNN3;RSU1;POLA1;PRDX6;HAP1;PDLIM3
GO:0030054_cell_junction	192	1.56	4.34	0.0353008	0.411843	DSTYK;PDPN;CDH2
GO:0032432_actin_filament_bundle	10	10	29.93	0.0367032	0.412911	CRYAB
GO:1990907_beta-catenin-TCF_complex	10	10	29.93	0.0367032	0.412911	LEF1
GO:0001931_uropod	12	8.33	24.5	0.0438822	0.460763	EZR
GO:0005667_transcription_regulator_complex	209	1.44	3.98	0.043597	0.460763	ARNTL;SMAD7;LEF1
GO:0005890_sodium:potassium-exchanging_ATPase_complex	12	8.33	24.5	0.0438822	0.460763	ATP1B2
GO:0031932_TORC2_complex	12	8.33	24.5	0.0438822	0.460763	PRR5L
GO:0005604_basement_membrane	93	2.15	5.97	0.0473664	0.474518	P3H2;LAMA4
GO:0031253_cell_projection_membrane	13	7.69	22.45	0.0474518	0.474518	ATP1B2
GO:0033391_chromatoid_body	13	7.69	22.45	0.0474518	0.474518	ARNTL
GO:0032587_ruffle_membrane	95	2.11	5.84	0.0492024	0.484336	EZR;PDPN
GO:0000800_lateral_element	14	7.14	20.72	0.0510082	0.487428	BRCA1
GO:0042383_sarcolemma	97	2.06	5.71	0.0510639	0.487428	ANXA1;CDH2
GO:0099059_integral_component_of_presynaptic_active_zone_membrane	15	6.67	19.24	0.0545514	0.512946	CDH2
GO:0045121_membrane_raft	236	1.27	3.51	0.058581	0.53487	SYNJ2;TGFBR2;PDPN
GO:0070160_tight_junction	16	6.25	17.96	0.0580816	0.53487	CLDN1
GO:0016363_nuclear_matrix	109	1.83	5.07	0.0627431	0.556734	CENPW;POLA1
GO:0098793_presynapse	109	1.83	5.07	0.0627431	0.556734	SYNJ2;DNMBP
GO:0031527_filopodium_membrane	18	5.56	15.84	0.0651028	0.56965	PDPN
GO:0014069_postsynaptic_density	252	1.19	3.28	0.0684616	0.578678	CRYAB;CNN3;CDH2
GO:0030992_intraciliary_transport_particle_B	19	5.26	14.97	0.068594	0.578678	IFT57
GO:0034774_secretory_granule_lumen	115	1.74	4.8	0.0688902	0.578678	PGM2;CRISPLD2
GO:0016234_inclusion_body	20	5	14.18	0.0720722	0.589682	HAP1
GO:0030863_cortical_cytoskeleton	20	5	14.18	0.0720722	0.589682	EZR
GO:0000784_nuclear_chromosome,_telomeric_region	124	1.61	4.45	0.0784624	0.614368	MCM4;MCM6
GO:0031258_lamellipodium_membrane	22	4.55	12.82	0.0789902	0.614368	PDPN
GO:0042629_mast_cell_granule	22	4.55	12.82	0.0789902	0.614368	ANXA1
GO:1904813_ficolin-1-rich_granule_lumen	124	1.61	4.45	0.0784624	0.614368	PGM2;CRISPLD2
GO:0000785_chromatin	126	1.59	4.37	0.0806437	0.619579	HR;POLA1
GO:0019897_extrinsic_component_of_plasma_membrane	23	4.35	12.24	0.08243	0.625674	SYTL2
GO:0005694_chromosome	130	1.54	4.24	0.085062	0.637965	NEIL1;BRCA1
GO:0005783_endoplasmic_reticulum	1022	0.68	1.9	0.0877851	0.639103	RNF128;FIBIN;EIF2AK3;CEMIP;P3H2;DNAJC1;HAP1
GO:0030057_desmosome	25	4	11.22	0.0892715	0.639103	DSC2
GO:0031430_M_band	25	4	11.22	0.0892715	0.639103	CRYAB
GO:0099060_integral_component_of_postsynaptic_specialization_membrane	25	4	11.22	0.0892715	0.639103	CDH2
GO:0045334_clathrin-coated_endocytic_vesicle	26	3.85	10.77	0.0926733	0.648713	CEMIP
GO:0070382_exocytic_vesicle	26	3.85	10.77	0.0926733	0.648713	SYTL2
GO:0030426_growth_cone	140	1.43	3.93	0.0964164	0.667498	PALLD;HAP1
GO:0005768_endosome	294	1.02	2.81	0.0976595	0.668755	ANXA1;ABCG1;EZR
GO:0002102_podosome	28	3.57	9.97	0.0994392	0.673621	PALLD
GO:0030669_clathrin-coated_endocytic_vesicle_membrane	31	3.23	8.98	0.109495	0.733846	HBEGF
GO:0036064_ciliary_basal_body	153	1.31	3.59	0.111773	0.741233	EZR;IFT57
GO:0060076_excitatory_synapse	33	3.03	8.41	0.116136	0.762144	PALLD
GO:0031941_filamentous_actin	34	2.94	8.16	0.119439	0.775736	PDLIM3
GO:0005795_Golgi_stack	37	2.7	7.48	0.129273	0.83104	DNMBP
GO:0005634_nucleus	5127	0.47	1.34	0.133958	0.85246	CRYAB;GRHL3;RGS4;FST;ANXA1;MCM4;MELK;BTG3;ARNTL;MEF2C;MCM6;SAMD11;PALLD;SMAD7;CLSPN;NEIL1;POLA1;PRDX6;CEMIP;LEF1;PTTG1IP;MCM10;WEE1;BRCA1
GO:0001772_immunological_synapse	39	2.56	7.09	0.135768	0.855341	EZR
GO:0031982_vesicle	174	1.15	3.15	0.137779	0.858519	ANXA1;EZR
GO:0032391_photoreceptor_connecting_cilium	40	2.5	6.9	0.138998	0.858519	IFT57
GO:0005887_integral_component_of_plasma_membrane	1389	0.58	1.59	0.147349	0.901258	S1PR3;HBEGF;SLC20A2;IL1RAP;CLDN1;TGFBR2;PDPN;CDH2
GO:0000118_histone_deacetylase_complex	44	2.27	6.26	0.151798	0.902198	HR
GO:0016529_sarcoplasmic_reticulum	44	2.27	6.26	0.151798	0.902198	P3H2
GO:0032993_protein-DNA_complex	44	2.27	6.26	0.151798	0.902198	LEF1
GO:0030315_T-tubule	45	2.22	6.12	0.154969	0.912434	EZR
GO:0097542_ciliary_tip	46	2.17	5.98	0.158128	0.922412	IFT57
GO:0000123_histone_acetyltransferase_complex	24	0	0	1	1
GO:0000124_SAGA_complex	12	0	0	1	1
GO:0000127_transcription_factor_TFIIIC_complex	6	0	0	1	1
GO:0000137_Golgi_cis_cisterna	29	0	0	1	1
GO:0000139_Golgi_membrane	617	0.49	1.31	0.405692	1	LDLRAD4;TGFA;ABCG1
GO:0000145_exocyst	19	0	0	1	1
GO:0000151_ubiquitin_ligase_complex	107	0.93	2.53	0.330243	1	BRCA1
GO:0000159_protein_phosphatase_type_2A_complex	19	0	0	1	1
GO:0000164_protein_phosphatase_type_1_complex	15	0	0	1	1
GO:0000172_ribonuclease_MRP_complex	9	0	0	1	1
GO:0000176_nuclear_exosome_(RNase_complex)	16	0	0	1	1
GO:0000177_cytoplasmic_exosome_(RNase_complex)	12	0	0	1	1
GO:0000178_exosome_(RNase_complex)	18	0	0	1	1
GO:0000228_nuclear_chromosome	52	0	0	1	1
GO:0000242_pericentriolar_material	21	0	0	1	1
GO:0000307_cyclin-dependent_protein_kinase_holoenzyme_complex	30	0	0	1	1
GO:0000346_transcription_export_complex	13	0	0	1	1
GO:0000407_phagophore_assembly_site	23	0	0	1	1
GO:0000421_autophagosome_membrane	33	0	0	1	1
GO:0000439_transcription_factor_TFIIH_core_complex	12	0	0	1	1
GO:0000445_THO_complex_part_of_transcription_export_complex	6	0	0	1	1
GO:0000502_proteasome_complex	56	0	0	1	1
GO:0000506_glycosylphosphatidylinositol-N-acetylglucosaminyltransferase_(GPI-GnT)_complex	8	0	0	1	1
GO:0000775_chromosome,_centromeric_region	52	1.92	5.28	0.176836	1	CENPW
GO:0000776_kinetochore	87	1.15	3.13	0.278047	1	CENPW
GO:0000777_condensed_chromosome_kinetochore	86	1.16	3.16	0.275334	1	CENPW
GO:0000778_condensed_nuclear_chromosome_kinetochore	11	0	0	1	1
GO:0000780_condensed_nuclear_chromosome,_centromeric_region	18	0	0	1	1
GO:0000781_chromosome,_telomeric_region	56	0	0	1	1
GO:0000783_nuclear_telomere_cap_complex	9	0	0	1	1
GO:0000786_nucleosome	94	0	0	1	1
GO:0000788_nuclear_nucleosome	39	0	0	1	1
GO:0000790_nuclear_chromatin	1190	0.5	1.38	0.284584	1	GRHL3;ARNTL;MEF2C;HIF3A;SMAD7;NPAS1
GO:0000792_heterochromatin	27	0	0	1	1
GO:0000793_condensed_chromosome	26	0	0	1	1
GO:0000794_condensed_nuclear_chromosome	28	0	0	1	1
GO:0000795_synaptonemal_complex	28	0	0	1	1
GO:0000801_central_element	8	0	0	1	1
GO:0000812_Swr1_complex	12	0	0	1	1
GO:0000813_ESCRT_I_complex	10	0	0	1	1
GO:0000815_ESCRT_III_complex	10	0	0	1	1
GO:0000922_spindle_pole	121	0	0	1	1
GO:0000930_gamma-tubulin_complex	15	0	0	1	1
GO:0000932_P-body	88	0	0	1	1
GO:0000940_condensed_chromosome_outer_kinetochore	10	0	0	1	1
GO:0000974_Prp19_complex	13	0	0	1	1
GO:0001401_SAM_complex	13	0	0	1	1
GO:0001518_voltage-gated_sodium_channel_complex	17	0	0	1	1
GO:0001527_microfibril	10	0	0	1	1
GO:0001669_acrosomal_vesicle	94	0	0	1	1
GO:0001673_male_germ_cell_nucleus	14	0	0	1	1
GO:0001741_XY_body	13	0	0	1	1
GO:0001750_photoreceptor_outer_segment	64	0	0	1	1
GO:0001917_photoreceptor_inner_segment	59	1.69	4.64	0.198143	1	ATP1B2
GO:0002080_acrosomal_membrane	22	0	0	1	1
GO:0002116_semaphorin_receptor_complex	11	0	0	1	1
GO:0002177_manchette	11	0	0	1	1
GO:0005575_cellular_component	434	0.23	0.61	0.805221	1	FIBIN
GO:0005581_collagen_trimer	60	0	0	1	1
GO:0005614_interstitial_matrix	13	0	0	1	1
GO:0005622_intracellular	122	0	0	1	1
GO:0005635_nuclear_envelope	183	0.55	1.47	0.496679	1	POLA1
GO:0005637_nuclear_inner_membrane	48	0	0	1	1
GO:0005639_integral_component_of_nuclear_inner_membrane	15	0	0	1	1
GO:0005640_nuclear_outer_membrane	27	0	0	1	1
GO:0005643_nuclear_pore	65	0	0	1	1
GO:0005657_replication_fork	26	0	0	1	1
GO:0005662_DNA_replication_factor_A_complex	15	0	0	1	1
GO:0005664_nuclear_origin_of_replication_recognition_complex	9	0	0	1	1
GO:0005665_RNA_polymerase_II,_core_complex	15	0	0	1	1
GO:0005666_RNA_polymerase_III_complex	18	0	0	1	1
GO:0005669_transcription_factor_TFIID_complex	33	0	0	1	1
GO:0005671_Ada2/Gcn5/Ada3_transcription_activator_complex	15	0	0	1	1
GO:0005675_transcription_factor_TFIIH_holo_complex	13	0	0	1	1
GO:0005680_anaphase-promoting_complex	22	0	0	1	1
GO:0005681_spliceosomal_complex	91	0	0	1	1
GO:0005682_U5_snRNP	21	0	0	1	1
GO:0005684_U2-type_spliceosomal_complex	12	0	0	1	1
GO:0005685_U1_snRNP	33	0	0	1	1
GO:0005686_U2_snRNP	21	0	0	1	1
GO:0005687_U4_snRNP	12	0	0	1	1
GO:0005688_U6_snRNP	13	0	0	1	1
GO:0005689_U12-type_spliceosomal_complex	28	0	0	1	1
GO:0005697_telomerase_holoenzyme_complex	21	0	0	1	1
GO:0005719_nuclear_euchromatin	34	0	0	1	1
GO:0005720_nuclear_heterochromatin	22	0	0	1	1
GO:0005721_pericentric_heterochromatin	14	0	0	1	1
GO:0005730_nucleolus	1245	0.4	1.08	0.498451	1	CENPW;POLA1;MCM10;HAP1;WEE1
GO:0005736_RNA_polymerase_I_complex	13	0	0	1	1
GO:0005739_mitochondrion	1266	0.47	1.29	0.334489	1	CRYAB;ABCG1;TXNRD1;HIF3A;PRDX6;HAP1
GO:0005741_mitochondrial_outer_membrane	166	0	0	1	1
GO:0005742_mitochondrial_outer_membrane_translocase_complex	9	0	0	1	1
GO:0005743_mitochondrial_inner_membrane	400	0	0	1	1
GO:0005744_TIM23_mitochondrial_import_inner_membrane_translocase_complex	10	0	0	1	1
GO:0005746_mitochondrial_respirasome	15	0	0	1	1
GO:0005747_mitochondrial_respiratory_chain_complex_I	50	0	0	1	1
GO:0005750_mitochondrial_respiratory_chain_complex_III	13	0	0	1	1
GO:0005751_mitochondrial_respiratory_chain_complex_IV	12	0	0	1	1
GO:0005753_mitochondrial_proton-transporting_ATP_synthase_complex	18	0	0	1	1
GO:0005758_mitochondrial_intermembrane_space	78	0	0	1	1
GO:0005759_mitochondrial_matrix	371	0.27	0.72	0.752602	1	ACSS1
GO:0005761_mitochondrial_ribosome	24	0	0	1	1
GO:0005762_mitochondrial_large_ribosomal_subunit	57	0	0	1	1
GO:0005763_mitochondrial_small_ribosomal_subunit	28	0	0	1	1
GO:0005764_lysosome	261	0.38	1.03	0.624909	1	HAP1
GO:0005765_lysosomal_membrane	315	0.32	0.85	0.694153	1	EVA1A
GO:0005769_early_endosome	264	0.76	2.06	0.258744	1	RAB31;HAP1
GO:0005770_late_endosome	138	0.72	1.96	0.403856	1	RNF128
GO:0005771_multivesicular_body	42	0	0	1	1
GO:0005773_vacuole	15	0	0	1	1
GO:0005774_vacuolar_membrane	21	0	0	1	1
GO:0005776_autophagosome	69	1.45	3.96	0.227638	1	HAP1
GO:0005777_peroxisome	106	0	0	1	1
GO:0005778_peroxisomal_membrane	57	0	0	1	1
GO:0005779_integral_component_of_peroxisomal_membrane	15	0	0	1	1
GO:0005782_peroxisomal_matrix	52	0	0	1	1
GO:0005786_signal_recognition_particle,_endoplasmic_reticulum_targeting	14	0	0	1	1
GO:0005790_smooth_endoplasmic_reticulum	27	0	0	1	1
GO:0005791_rough_endoplasmic_reticulum	55	0	0	1	1
GO:0005793_endoplasmic_reticulum-Golgi_intermediate_compartment	77	0	0	1	1
GO:0005796_Golgi_lumen	102	0	0	1	1
GO:0005797_Golgi_medial_cisterna	10	0	0	1	1
GO:0005798_Golgi-associated_vesicle	17	0	0	1	1
GO:0005801_cis-Golgi_network	65	0	0	1	1
GO:0005802_trans-Golgi_network	172	0	0	1	1
GO:0005811_lipid_droplet	93	0	0	1	1
GO:0005813_centrosome	506	0.59	1.61	0.29275	1	IFT57;SMAD7;HAP1
GO:0005814_centriole	143	0.7	1.89	0.414954	1	HAP1
GO:0005815_microtubule_organizing_center	96	1.04	2.83	0.302015	1	NEIL1
GO:0005819_spindle	122	0	0	1	1
GO:0005832_chaperonin-containing_T-complex	10	0	0	1	1
GO:0005833_hemoglobin_complex	12	0	0	1	1
GO:0005834_heterotrimeric_G-protein_complex	34	0	0	1	1
GO:0005839_proteasome_core_complex	20	0	0	1	1
GO:0005840_ribosome	67	0	0	1	1
GO:0005844_polysome	40	0	0	1	1
GO:0005845_mRNA_cap_binding_complex	11	0	0	1	1
GO:0005847_mRNA_cleavage_and_polyadenylation_specificity_factor_complex	18	0	0	1	1
GO:0005851_eukaryotic_translation_initiation_factor_2B_complex	6	0	0	1	1
GO:0005852_eukaryotic_translation_initiation_factor_3_complex	17	0	0	1	1
GO:0005858_axonemal_dynein_complex	11	0	0	1	1
GO:0005859_muscle_myosin_complex	15	0	0	1	1
GO:0005861_troponin_complex	9	0	0	1	1
GO:0005865_striated_muscle_thin_filament	10	0	0	1	1
GO:0005868_cytoplasmic_dynein_complex	21	0	0	1	1
GO:0005869_dynactin_complex	16	0	0	1	1
GO:0005871_kinesin_complex	48	0	0	1	1
GO:0005874_microtubule	305	0	0	1	1
GO:0005875_microtubule_associated_complex	32	0	0	1	1
GO:0005876_spindle_microtubule	45	0	0	1	1
GO:0005881_cytoplasmic_microtubule	60	0	0	1	1
GO:0005882_intermediate_filament	107	0.93	2.53	0.330243	1	KRT75
GO:0005885_Arp2/3_protein_complex	11	0	0	1	1
GO:0005891_voltage-gated_calcium_channel_complex	27	0	0	1	1
GO:0005892_acetylcholine-gated_channel_complex	16	0	0	1	1
GO:0005901_caveola	75	1.33	3.63	0.244816	1	TGFBR2
GO:0005902_microvillus	70	1.43	3.9	0.230527	1	EZR
GO:0005903_brush_border	55	1.82	4.98	0.186036	1	EZR
GO:0005905_clathrin-coated_pit	59	1.69	4.64	0.198143	1	CEMIP
GO:0005921_gap_junction	19	0	0	1	1
GO:0005922_connexin_complex	21	0	0	1	1
GO:0005923_bicellular_tight_junction	122	0.82	2.22	0.366922	1	CLDN1
GO:0005929_cilium	209	0.48	1.29	0.54363	1	IFT57
GO:0005930_axoneme	104	0.96	2.61	0.322659	1	IFT57
GO:0005938_cell_cortex	142	0.7	1.9	0.412751	1	MELK
GO:0005940_septin_ring	14	0	0	1	1
GO:0005942_phosphatidylinositol_3-kinase_complex	22	0	0	1	1
GO:0005952_cAMP-dependent_protein_kinase_complex	10	0	0	1	1
GO:0008021_synaptic_vesicle	131	0.76	2.06	0.387967	1	HAP1
GO:0008023_transcription_elongation_factor_complex	22	0	0	1	1
GO:0008076_voltage-gated_potassium_channel_complex	85	0	0	1	1
GO:0008180_COP9_signalosome	36	0	0	1	1
GO:0008250_oligosaccharyltransferase_complex	12	0	0	1	1
GO:0008278_cohesin_complex	10	0	0	1	1
GO:0008305_integrin_complex	25	0	0	1	1
GO:0008328_ionotropic_glutamate_receptor_complex	12	0	0	1	1
GO:0008385_IkappaB_kinase_complex	9	0	0	1	1
GO:0008540_proteasome_regulatory_particle,_base_subcomplex	12	0	0	1	1
GO:0009898_cytoplasmic_side_of_plasma_membrane	52	0	0	1	1
GO:0009925_basal_plasma_membrane	51	0	0	1	1
GO:0010008_endosome_membrane	222	0	0	1	1
GO:0010369_chromocenter	13	0	0	1	1
GO:0010494_cytoplasmic_stress_granule	74	0	0	1	1
GO:0012505_endomembrane_system	125	0.8	2.16	0.374015	1	RAB31
GO:0012506_vesicle_membrane	30	0	0	1	1
GO:0012507_ER_to_Golgi_transport_vesicle_membrane	52	1.92	5.28	0.176836	1	TGFA
GO:0014701_junctional_sarcoplasmic_reticulum_membrane	9	0	0	1	1
GO:0015030_Cajal_body	71	0	0	1	1
GO:0015630_microtubule_cytoskeleton	158	0.63	1.71	0.447036	1	CRYAB
GO:0015935_small_ribosomal_subunit	20	0	0	1	1
GO:0016010_dystrophin-associated_glycoprotein_complex	17	0	0	1	1
GO:0016235_aggresome	39	0	0	1	1
GO:0016281_eukaryotic_translation_initiation_factor_4F_complex	13	0	0	1	1
GO:0016282_eukaryotic_43S_preinitiation_complex	17	0	0	1	1
GO:0016327_apicolateral_plasma_membrane	19	0	0	1	1
GO:0016442_RISC_complex	16	0	0	1	1
GO:0016459_myosin_complex	32	0	0	1	1
GO:0016471_vacuolar_proton-transporting_V-type_ATPase_complex	14	0	0	1	1
GO:0016514_SWI/SNF_complex	19	0	0	1	1
GO:0016580_Sin3_complex	13	0	0	1	1
GO:0016581_NuRD_complex	15	0	0	1	1
GO:0016591_RNA_polymerase_II,_holoenzyme	7	0	0	1	1
GO:0016592_mediator_complex	41	0	0	1	1
GO:0016593_Cdc73/Paf1_complex	8	0	0	1	1
GO:0016600_flotillin_complex	8	0	0	1	1
GO:0016604_nuclear_body	312	0.64	1.74	0.324888	1	HR;BRCA1
GO:0016605_PML_body	101	0.99	2.69	0.314989	1	ARNTL
GO:0016607_nuclear_speck	400	0.5	1.35	0.441274	1	MEF2C;HIF3A
GO:0017053_transcription_repressor_complex	54	0	0	1	1
GO:0017101_aminoacyl-tRNA_synthetase_multienzyme_complex	11	0	0	1	1
GO:0017119_Golgi_transport_complex	13	0	0	1	1
GO:0017146_NMDA_selective_glutamate_receptor_complex	11	0	0	1	1
GO:0019005_SCF_ubiquitin_ligase_complex	63	0	0	1	1
GO:0019773_proteasome_core_complex,_alpha-subunit_complex	8	0	0	1	1
GO:0019774_proteasome_core_complex,_beta-subunit_complex	11	0	0	1	1
GO:0019814_immunoglobulin_complex	0	NA	0	1	1
GO:0022624_proteasome_accessory_complex	17	0	0	1	1
GO:0022625_cytosolic_large_ribosomal_subunit	56	0	0	1	1
GO:0022627_cytosolic_small_ribosomal_subunit	46	0	0	1	1
GO:0030008_TRAPP_complex	15	0	0	1	1
GO:0030014_CCR4-NOT_complex	16	0	0	1	1
GO:0030016_myofibril	29	0	0	1	1
GO:0030017_sarcomere	46	0	0	1	1
GO:0030122_AP-2_adaptor_complex	11	0	0	1	1
GO:0030126_COPI_vesicle_coat	13	0	0	1	1
GO:0030127_COPII_vesicle_coat	15	0	0	1	1
GO:0030133_transport_vesicle	92	1.09	2.95	0.291461	1	CRISPLD2
GO:0030134_COPII-coated_ER_to_Golgi_transport_vesicle	41	0	0	1	1
GO:0030136_clathrin-coated_vesicle	59	0	0	1	1
GO:0030137_COPI-coated_vesicle	11	0	0	1	1
GO:0030139_endocytic_vesicle	62	0	0	1	1
GO:0030140_trans-Golgi_network_transport_vesicle	17	0	0	1	1
GO:0030141_secretory_granule	91	1.1	2.99	0.288798	1	PLAT
GO:0030173_integral_component_of_Golgi_membrane	61	0	0	1	1
GO:0030176_integral_component_of_endoplasmic_reticulum_membrane	111	0.9	2.44	0.340225	1	EIF2AK3
GO:0030285_integral_component_of_synaptic_vesicle_membrane	34	0	0	1	1
GO:0030286_dynein_complex	25	0	0	1	1
GO:0030424_axon	311	0.64	1.74	0.32352	1	CRYAB;PALLD
GO:0030425_dendrite	420	0.24	0.63	0.79458	1	HAP1
GO:0030496_midbody	161	0	0	1	1
GO:0030532_small_nuclear_ribonucleoprotein_complex	14	0	0	1	1
GO:0030658_transport_vesicle_membrane	40	0	0	1	1
GO:0030659_cytoplasmic_vesicle_membrane	144	0.69	1.88	0.417149	1	ANXA1
GO:0030660_Golgi-associated_vesicle_membrane	19	0	0	1	1
GO:0030666_endocytic_vesicle_membrane	66	1.52	4.14	0.218904	1	HBEGF
GO:0030667_secretory_granule_membrane	99	1.01	2.74	0.309828	1	RAB31
GO:0030670_phagocytic_vesicle_membrane	74	0	0	1	1
GO:0030672_synaptic_vesicle_membrane	68	0	0	1	1
GO:0030673_axolemma	15	0	0	1	1
GO:0030681_multimeric_ribonuclease_P_complex	10	0	0	1	1
GO:0030686_90S_preribosome	12	0	0	1	1
GO:0030687_preribosome,_large_subunit_precursor	22	0	0	1	1
GO:0030688_preribosome,_small_subunit_precursor	13	0	0	1	1
GO:0030864_cortical_actin_cytoskeleton	53	1.89	5.18	0.179914	1	CDH2
GO:0030867_rough_endoplasmic_reticulum_membrane	10	0	0	1	1
GO:0030870_Mre11_complex	7	0	0	1	1
GO:0030877_beta-catenin_destruction_complex	12	0	0	1	1
GO:0030897_HOPS_complex	12	0	0	1	1
GO:0030904_retromer_complex	21	0	0	1	1
GO:0030914_STAGA_complex	12	0	0	1	1
GO:0030915_Smc5-Smc6_complex	7	0	0	1	1
GO:0030991_intraciliary_transport_particle_A	7	0	0	1	1
GO:0031011_Ino80_complex	15	0	0	1	1
GO:0031045_dense_core_granule	14	0	0	1	1
GO:0031080_nuclear_pore_outer_ring	10	0	0	1	1
GO:0031083_BLOC-1_complex	15	0	0	1	1
GO:0031089_platelet_dense_granule_lumen	14	0	0	1	1
GO:0031090_organelle_membrane	16	0	0	1	1
GO:0031091_platelet_alpha_granule	15	0	0	1	1
GO:0031092_platelet_alpha_granule_membrane	17	0	0	1	1
GO:0031093_platelet_alpha_granule_lumen	67	0	0	1	1
GO:0031105_septin_complex	14	0	0	1	1
GO:0031143_pseudopodium	18	0	0	1	1
GO:0031201_SNARE_complex	50	0	0	1	1
GO:0031209_SCAR_complex	10	0	0	1	1
GO:0031224_intrinsic_component_of_membrane	13	0	0	1	1
GO:0031225_anchored_component_of_membrane	102	0.98	2.66	0.317555	1	NT5E
GO:0031226_intrinsic_component_of_plasma_membrane	37	0	0	1	1
GO:0031227_intrinsic_component_of_endoplasmic_reticulum_membrane	9	0	0	1	1
GO:0031234_extrinsic_component_of_cytoplasmic_side_of_plasma_membrane	65	0	0	1	1
GO:0031252_cell_leading_edge	47	0	0	1	1
GO:0031301_integral_component_of_organelle_membrane	10	0	0	1	1
GO:0031305_integral_component_of_mitochondrial_inner_membrane	40	0	0	1	1
GO:0031307_integral_component_of_mitochondrial_outer_membrane	23	0	0	1	1
GO:0031314_extrinsic_component_of_mitochondrial_inner_membrane	14	0	0	1	1
GO:0031362_anchored_component_of_external_side_of_plasma_membrane	19	0	0	1	1
GO:0031428_box_C/D_snoRNP_complex	7	0	0	1	1
GO:0031429_box_H/ACA_snoRNP_complex	5	0	0	1	1
GO:0031461_cullin-RING_ubiquitin_ligase_complex	13	0	0	1	1
GO:0031462_Cul2-RING_ubiquitin_ligase_complex	14	0	0	1	1
GO:0031463_Cul3-RING_ubiquitin_ligase_complex	36	0	0	1	1
GO:0031464_Cul4A-RING_E3_ubiquitin_ligase_complex	12	0	0	1	1
GO:0031514_motile_cilium	103	0.97	2.63	0.320112	1	ANXA1
GO:0031519_PcG_protein_complex	27	0	0	1	1
GO:0031526_brush_border_membrane	58	0	0	1	1
GO:0031588_nucleotide-activated_protein_kinase_complex	9	0	0	1	1
GO:0031594_neuromuscular_junction	76	0	0	1	1
GO:0031616_spindle_pole_centrosome	15	0	0	1	1
GO:0031672_A_band	12	0	0	1	1
GO:0031674_I_band	20	0	0	1	1
GO:0031680_G-protein_beta/gamma-subunit_complex	12	0	0	1	1
GO:0031838_haptoglobin-hemoglobin_complex	11	0	0	1	1
GO:0031902_late_endosome_membrane	120	0	0	1	1
GO:0031904_endosome_lumen	18	0	0	1	1
GO:0031931_TORC1_complex	8	0	0	1	1
GO:0031965_nuclear_membrane	238	0.42	1.13	0.590896	1	DNAJC1
GO:0031966_mitochondrial_membrane	110	0.91	2.46	0.337743	1	ANXA1
GO:0031985_Golgi_cisterna	9	0	0	1	1
GO:0032009_early_phagosome	12	0	0	1	1
GO:0032039_integrator_complex	28	0	0	1	1
GO:0032040_small-subunit_processome	39	0	0	1	1
GO:0032045_guanyl-nucleotide_exchange_factor_complex	12	0	0	1	1
GO:0032153_cell_division_site	14	0	0	1	1
GO:0032154_cleavage_furrow	53	0	0	1	1
GO:0032281_AMPA_glutamate_receptor_complex	26	0	0	1	1
GO:0032300_mismatch_repair_complex	8	0	0	1	1
GO:0032420_stereocilium	34	0	0	1	1
GO:0032426_stereocilium_tip	18	0	0	1	1
GO:0032433_filopodium_tip	18	0	0	1	1
GO:0032580_Golgi_cisterna_membrane	92	0	0	1	1
GO:0032585_multivesicular_body_membrane	13	0	0	1	1
GO:0032588_trans-Golgi_network_membrane	92	1.09	2.95	0.291461	1	RAB31
GO:0032590_dendrite_membrane	30	0	0	1	1
GO:0032591_dendritic_spine_membrane	14	0	0	1	1
GO:0032592_integral_component_of_mitochondrial_membrane	10	0	0	1	1
GO:0032593_insulin-responsive_compartment	10	0	0	1	1
GO:0032797_SMN_complex	11	0	0	1	1
GO:0032809_neuronal_cell_body_membrane	28	0	0	1	1
GO:0032839_dendrite_cytoplasm	33	0	0	1	1
GO:0032982_myosin_filament	16	0	0	1	1
GO:0033017_sarcoplasmic_reticulum_membrane	33	0	0	1	1
GO:0033018_sarcoplasmic_reticulum_lumen	9	0	0	1	1
GO:0033116_endoplasmic_reticulum-Golgi_intermediate_compartment_membrane	74	1.35	3.68	0.24198	1	TGFA
GO:0033162_melanosome_membrane	14	0	0	1	1
GO:0033268_node_of_Ranvier	15	0	0	1	1
GO:0033270_paranode_region_of_axon	12	0	0	1	1
GO:0033276_transcription_factor_TFTC_complex	14	0	0	1	1
GO:0033290_eukaryotic_48S_preinitiation_complex	15	0	0	1	1
GO:0033588_Elongator_holoenzyme_complex	7	0	0	1	1
GO:0034045_phagophore_assembly_site_membrane	16	0	0	1	1
GO:0034098_VCP-NPL4-UFD1_AAA_ATPase_complex	8	0	0	1	1
GO:0034361_very-low-density_lipoprotein_particle	20	0	0	1	1
GO:0034362_low-density_lipoprotein_particle	13	0	0	1	1
GO:0034364_high-density_lipoprotein_particle	23	0	0	1	1
GO:0034366_spherical_high-density_lipoprotein_particle	8	0	0	1	1
GO:0034399_nuclear_periphery	14	0	0	1	1
GO:0034451_centriolar_satellite	95	0	0	1	1
GO:0034464_BBSome	8	0	0	1	1
GO:0034663_endoplasmic_reticulum_chaperone_complex	10	0	0	1	1
GO:0034704_calcium_channel_complex	24	0	0	1	1
GO:0034707_chloride_channel_complex	48	0	0	1	1
GO:0034709_methylosome	12	0	0	1	1
GO:0034719_SMN-Sm_protein_complex	17	0	0	1	1
GO:0034993_meiotic_nuclear_membrane_microtubule_tethering_complex	11	0	0	1	1
GO:0035097_histone_methyltransferase_complex	34	0	0	1	1
GO:0035098_ESC/E(Z)_complex	16	0	0	1	1
GO:0035102_PRC1_complex	15	0	0	1	1
GO:0035145_exon-exon_junction_complex	20	0	0	1	1
GO:0035253_ciliary_rootlet	11	0	0	1	1
GO:0035267_NuA4_histone_acetyltransferase_complex	20	0	0	1	1
GO:0035327_transcriptionally_active_chromatin	24	0	0	1	1
GO:0035371_microtubule_plus-end	23	0	0	1	1
GO:0035577_azurophil_granule_membrane	58	1.72	4.72	0.195133	1	GLIPR1
GO:0035578_azurophil_granule_lumen	91	1.1	2.99	0.288798	1	PRDX6
GO:0035579_specific_granule_membrane	90	0	0	1	1
GO:0035580_specific_granule_lumen	62	1.61	4.41	0.207107	1	PTX3
GO:0035631_CD40_receptor_complex	11	0	0	1	1
GO:0035770_ribonucleoprotein_granule	11	0	0	1	1
GO:0035861_site_of_double-strand_break	60	0	0	1	1
GO:0035869_ciliary_transition_zone	29	0	0	1	1
GO:0036020_endolysosome_membrane	14	0	0	1	1
GO:0036038_MKS_complex	13	0	0	1	1
GO:0036126_sperm_flagellum	61	0	0	1	1
GO:0036128_CatSper_complex	10	0	0	1	1
GO:0036157_outer_dynein_arm	11	0	0	1	1
GO:0036449_microtubule_minus-end	8	0	0	1	1
GO:0036464_cytoplasmic_ribonucleoprotein_granule	78	0	0	1	1
GO:0036477_somatodendritic_compartment	13	0	0	1	1
GO:0042101_T_cell_receptor_complex	16	0	0	1	1
GO:0042405_nuclear_inclusion_body	12	0	0	1	1
GO:0042470_melanosome	99	1.01	2.74	0.309828	1	SYTL2
GO:0042571_immunoglobulin_complex,_circulating	2	0	0	1	1
GO:0042581_specific_granule	13	0	0	1	1
GO:0042582_azurophil_granule	10	0	0	1	1
GO:0042589_zymogen_granule_membrane	11	0	0	1	1
GO:0042613_MHC_class_II_protein_complex	14	0	0	1	1
GO:0042622_photoreceptor_outer_segment_membrane	17	0	0	1	1
GO:0042627_chylomicron	13	0	0	1	1
GO:0042641_actomyosin	13	0	0	1	1
GO:0042645_mitochondrial_nucleoid	43	0	0	1	1
GO:0042734_presynaptic_membrane	67	0	0	1	1
GO:0042765_GPI-anchor_transamidase_complex	5	0	0	1	1
GO:0042788_polysomal_ribosome	32	0	0	1	1
GO:0042824_MHC_class_I_peptide_loading_complex	8	0	0	1	1
GO:0043005_neuron_projection	338	0.3	0.79	0.719652	1	CDH2
GO:0043020_NADPH_oxidase_complex	12	0	0	1	1
GO:0043025_neuronal_cell_body	377	0.53	1.43	0.411785	1	PDE1C;CNN3
GO:0043034_costamere	19	0	0	1	1
GO:0043083_synaptic_cleft	17	0	0	1	1
GO:0043186_P_granule	15	0	0	1	1
GO:0043194_axon_initial_segment	17	0	0	1	1
GO:0043195_terminal_bouton	54	0	0	1	1
GO:0043198_dendritic_shaft	38	0	0	1	1
GO:0043202_lysosomal_lumen	94	0	0	1	1
GO:0043204_perikaryon	156	0.64	1.73	0.442861	1	CRYAB
GO:0043209_myelin_sheath	28	0	0	1	1
GO:0043220_Schmidt-Lanterman_incisure	11	0	0	1	1
GO:0043231_intracellular_membrane-bounded_organelle	791	0.63	1.73	0.173746	1	LDLRAD4;ARNTL;MEF2C;LRRC2;EVA1A
GO:0043235_receptor_complex	207	0.48	1.3	0.540178	1	TGFBR2
GO:0043240_Fanconi_anaemia_nuclear_complex	14	0	0	1	1
GO:0043296_apical_junction_complex	22	0	0	1	1
GO:0043596_nuclear_replication_fork	12	0	0	1	1
GO:0043657_host_cell	51	0	0	1	1
GO:0043679_axon_terminus	60	0	0	1	1
GO:0044214_spanning_component_of_plasma_membrane	12	0	0	1	1
GO:0044224_juxtaparanode_region_of_axon	10	0	0	1	1
GO:0044233_mitochondria-associated_endoplasmic_reticulum_membrane	16	0	0	1	1
GO:0044291_cell-cell_contact_zone	25	0	0	1	1
GO:0044295_axonal_growth_cone	29	0	0	1	1
GO:0044297_cell_body	76	1.32	3.59	0.247642	1	EZR
GO:0044305_calyx_of_Held	24	0	0	1	1
GO:0044306_neuron_projection_terminus	20	0	0	1	1
GO:0044322_endoplasmic_reticulum_quality_control_compartment	23	0	0	1	1
GO:0044327_dendritic_spine_head	12	0	0	1	1
GO:0044615_nuclear_pore_nuclear_basket	12	0	0	1	1
GO:0044666_MLL3/4_complex	13	0	0	1	1
GO:0045095_keratin_filament	93	1.08	2.92	0.294115	1	KRT75
GO:0045111_intermediate_filament_cytoskeleton	49	0	0	1	1
GO:0045171_intercellular_bridge	71	0	0	1	1
GO:0045178_basal_part_of_cell	15	0	0	1	1
GO:0045202_synapse	419	0.24	0.64	0.793799	1	DNMBP
GO:0045211_postsynaptic_membrane	141	0	0	1	1
GO:0045335_phagocytic_vesicle	66	1.52	4.14	0.218904	1	RAB31
GO:0046540_U4/U6_x_U5_tri-snRNP_complex	43	0	0	1	1
GO:0046658_anchored_component_of_plasma_membrane	31	0	0	1	1
GO:0046930_pore_complex	13	0	0	1	1
GO:0048188_Set1C/COMPASS_complex	12	0	0	1	1
GO:0048786_presynaptic_active_zone	39	0	0	1	1
GO:0048787_presynaptic_active_zone_membrane	12	0	0	1	1
GO:0051233_spindle_midzone	25	0	0	1	1
GO:0055037_recycling_endosome	126	0.79	2.15	0.376362	1	ABCG1
GO:0055038_recycling_endosome_membrane	84	1.19	3.24	0.269877	1	CD274
GO:0060077_inhibitory_synapse	14	0	0	1	1
GO:0060170_ciliary_membrane	55	0	0	1	1
GO:0061617_MICOS_complex	9	0	0	1	1
GO:0061700_GATOR2_complex	12	0	0	1	1
GO:0070187_shelterin_complex	7	0	0	1	1
GO:0070652_HAUS_complex	8	0	0	1	1
GO:0070776_MOZ/MORF_histone_acetyltransferase_complex	8	0	0	1	1
GO:0070821_tertiary_granule_membrane	72	0	0	1	1
GO:0070971_endoplasmic_reticulum_exit_site	31	0	0	1	1
GO:0071004_U2-type_prespliceosome	16	0	0	1	1
GO:0071005_U2-type_precatalytic_spliceosome	50	0	0	1	1
GO:0071006_U2-type_catalytic_step_1_spliceosome	12	0	0	1	1
GO:0071007_U2-type_catalytic_step_2_spliceosome	30	0	0	1	1
GO:0071011_precatalytic_spliceosome	19	0	0	1	1
GO:0071013_catalytic_step_2_spliceosome	85	0	0	1	1
GO:0071203_WASH_complex	12	0	0	1	1
GO:0071339_MLL1_complex	29	0	0	1	1
GO:0071458_integral_component_of_cytoplasmic_side_of_endoplasmic_reticulum_membrane	6	0	0	1	1
GO:0071556_integral_component_of_lumenal_side_of_endoplasmic_reticulum_membrane	27	0	0	1	1
GO:0071564_npBAF_complex	12	0	0	1	1
GO:0071565_nBAF_complex	15	0	0	1	1
GO:0071682_endocytic_vesicle_lumen	16	0	0	1	1
GO:0071782_endoplasmic_reticulum_tubular_network	16	0	0	1	1
GO:0071986_Ragulator_complex	6	0	0	1	1
GO:0072546_ER_membrane_protein_complex	10	0	0	1	1
GO:0072559_NLRP3_inflammasome_complex	9	0	0	1	1
GO:0072562_blood_microparticle	115	0	0	1	1
GO:0072669_tRNA-splicing_ligase_complex	8	0	0	1	1
GO:0072686_mitotic_spindle	100	0	0	1	1
GO:0072687_meiotic_spindle	10	0	0	1	1
GO:0080008_Cul4-RING_E3_ubiquitin_ligase_complex	28	0	0	1	1
GO:0090543_Flemming_body	31	0	0	1	1
GO:0090575_RNA_polymerase_II_transcription_regulator_complex	61	0	0	1	1
GO:0090661_box_H/ACA_telomerase_RNP_complex	5	0	0	1	1
GO:0090734_site_of_DNA_damage	24	0	0	1	1
GO:0097038_perinuclear_endoplasmic_reticulum	17	0	0	1	1
GO:0097224_sperm_connecting_piece	9	0	0	1	1
GO:0097225_sperm_midpiece	29	0	0	1	1
GO:0097228_sperm_principal_piece	25	0	0	1	1
GO:0097381_photoreceptor_disc_membrane	23	0	0	1	1
GO:0097386_glial_cell_projection	13	0	0	1	1
GO:0097431_mitotic_spindle_pole	30	0	0	1	1
GO:0097440_apical_dendrite	17	0	0	1	1
GO:0097504_Gemini_of_coiled_bodies	12	0	0	1	1
GO:0097539_ciliary_transition_fiber	10	0	0	1	1
GO:0097546_ciliary_base	36	0	0	1	1
GO:0097730_non-motile_cilium	29	0	0	1	1
GO:0097731_9+0_non-motile_cilium	22	0	0	1	1
GO:0098685_Schaffer_collateral_-_CA1_synapse	84	1.19	3.24	0.269877	1	PLAT
GO:0098686_hippocampal_mossy_fiber_to_CA3_synapse	34	0	0	1	1
GO:0098688_parallel_fiber_to_Purkinje_cell_synapse	16	0	0	1	1
GO:0098691_dopaminergic_synapse	13	0	0	1	1
GO:0098794_postsynapse	93	1.08	2.92	0.294115	1	MEF2C
GO:0098831_presynaptic_active_zone_cytoplasmic_component	13	0	0	1	1
GO:0098839_postsynaptic_density_membrane	39	0	0	1	1
GO:0098978_glutamatergic_synapse	355	0.56	1.52	0.382896	1	PLAT;IL1RAP
GO:0098981_cholinergic_synapse	10	0	0	1	1
GO:0098982_GABA-ergic_synapse	70	0	0	1	1
GO:0098993_anchored_component_of_synaptic_vesicle_membrane	13	0	0	1	1
GO:0099055_integral_component_of_postsynaptic_membrane	45	0	0	1	1
GO:0099056_integral_component_of_presynaptic_membrane	59	0	0	1	1
GO:0099061_integral_component_of_postsynaptic_density_membrane	51	0	0	1	1
GO:0099078_BORC_complex	8	0	0	1	1
GO:0099092_postsynaptic_density,_intracellular_component	17	0	0	1	1
GO:0099523_presynaptic_cytosol	14	0	0	1	1
GO:0099524_postsynaptic_cytosol	18	0	0	1	1
GO:0099738_cell_cortex_region	11	0	0	1	1
GO:0101003_ficolin-1-rich_granule_membrane	60	0	0	1	1
GO:0101031_chaperone_complex	13	0	0	1	1
GO:1902494_catalytic_complex	12	0	0	1	1
GO:1902711_GABA-A_receptor_complex	19	0	0	1	1
GO:1903561_extracellular_vesicle	172	0	0	1	1
GO:1904115_axon_cytoplasm	57	1.75	4.8	0.192112	1	HAP1
GO:1904724_tertiary_granule_lumen	55	1.82	4.98	0.186036	1	PTX3
GO:1990023_mitotic_spindle_midzone	14	0	0	1	1
GO:1990124_messenger_ribonucleoprotein_complex	10	0	0	1	1
GO:1990246_uniplex_complex	6	0	0	1	1
GO:1990454_L-type_voltage-gated_calcium_channel_complex	12	0	0	1	1
GO:1990904_ribonucleoprotein_complex	154	0.65	1.75	0.438655	1	BRCA1
GO:1990909_Wnt_signalosome	12	0	0	1	1

## Sheet: MF_8hrs - ORA_Tt8_vs_NIt8-MF_al
ORA_Tt8_vs_NIt8-MF_all
geneset	NGenes	pctDE	OR	pvalue	FDR	external_gene_name.DE
GO:0005515_protein_binding	12037	0.61	3.51	3.19343e-09	2.83577e-06	S1PR3;HBEGF;PRSS35;TNFRSF11B;CRYAB;TGFA;GRHL3;TNFRSF19;KRT75;SECTM1;SPP1;COLGALT2;PGM2;FST;ANXA1;SYTL2;MCM4;MELK;BTG3;ARNTL;SYNJ2;PLAT;ABCG1;EZR;TXNRD1;CLDN1;TGFBR2;CENPW;RNF128;MEF2C;MCM6;SAMD11;CHODL;ABCG4;RAB31;HR;IFT57;NT5E;CALCB;PALLD;TPM4;SMAD7;GINS4;PDPN;CLSPN;SFRP1;CDCP1;EVA1A;EIF2AK3;C3orf52;PTPN21;CDH2;RSU1;POLA1;ATP1B2;PRDX6;CEMIP;DNAJC1;ACSS1;PRIM1;LAMA4;LEF1;EMP1;PTX3;DNMBP;PTTG1IP;M…
GO:0003688_DNA_replication_origin_binding	23	17.39	58.42	1.53076e-06	0.000679657	MCM4;MCM6;POLA1;MCM10
GO:0046982_protein_heterodimerization_activity	317	2.52	7.43	2.54368e-05	0.00564697	ARNTL;ABCG1;CENPW;MEF2C;ABCG4;TPM4;NPAS1;ATP1B2
GO:0048185_activin_binding	15	20	68.64	2.22078e-05	0.00564697	FST;TGFBR2;SMAD7
GO:0003697_single-stranded_DNA_binding	104	4.81	14.14	4.49113e-05	0.00797624	ANXA1;MCM4;MCM6;POLA1;MCM10
GO:0034713_type_I_transforming_growth_factor_beta_receptor_binding	9	22.22	77.53	0.00048794	0.0722151	TGFBR2;SMAD7
GO:0045295_gamma-catenin_binding	12	16.67	54.34	0.000888043	0.112655	CDH2;LEF1
GO:0042802_identical_protein_binding	1465	0.96	2.83	0.00107494	0.119318	CRYAB;ANXA1;EZR;CLDN1;UAP1;MCM6;TPM4;SFRP1;EIF2AK3;CDH2;PRDX6;PTX3;MCM10;BRCA1
GO:0051371_muscle_alpha-actinin_binding	15	13.33	41.84	0.00140252	0.138382	PALLD;PDLIM3
GO:0000976_transcription_regulatory_region_sequence-specific_DNA_binding	227	2.2	6.28	0.00163617	0.145292	ARNTL;MEF2C;SMAD7;LEF1;BRCA1
GO:0098641_cadherin_binding_involved_in_cell-cell_adhesion	18	11.11	34	0.00202882	0.163781	ANXA1;CNN3
GO:0001671_ATPase_activator_activity	24	8.33	24.74	0.00360688	0.250219	ATP1B2;DNAJC1
GO:0005539_glycosaminoglycan_binding	26	7.69	22.68	0.00422668	0.250219	TGFBR2;CRISPLD2
GO:0008013_beta-catenin_binding	85	3.53	10.03	0.00399082	0.250219	SMAD7;CDH2;LEF1
GO:0008201_heparin_binding	169	2.37	6.7	0.00374179	0.250219	HBEGF;COL11A1;SFRP1;CRISPLD2
GO:0050840_extracellular_matrix_binding	29	6.9	20.14	0.00524183	0.290922	SPP1;COL11A1
GO:0005154_epidermal_growth_factor_receptor_binding	34	5.88	17	0.00715586	0.373789	HBEGF;TGFA
GO:0005102_signaling_receptor_binding	357	1.4	3.94	0.0109647	0.500408	ANXA1;PLAT;PDPN;LAMA4;HAP1
GO:0008307_structural_constituent_of_muscle	43	4.65	13.26	0.0112705	0.500408	TPM4;PDLIM3
GO:0051879_Hsp90_protein_binding	42	4.76	13.6	0.0107722	0.500408	ARNTL;EIF2AK3
GO:0004715_non-membrane_spanning_protein_tyrosine_kinase_activity	46	4.35	12.36	0.0128248	0.542307	MELK;WEE1
GO:0003678_DNA_helicase_activity	54	3.7	10.46	0.0173933	0.671533	MCM4;MCM6
GO:0003779_actin_binding	263	1.52	4.25	0.0170685	0.671533	EZR;PALLD;CNN3;PDLIM3
GO:0003684_damaged_DNA_binding	56	3.57	10.06	0.0186284	0.689249	NEIL1;BRCA1
GO:0000166_nucleotide_binding	58	3.45	9.71	0.0198994	0.706825	NT5E;POLA1
GO:0001228_DNA-binding_transcription_activator_activity,_RNA_polymerase_II-specific	512	0.98	2.72	0.0429823	0.742545	GRHL3;ARNTL;MEF2C;SMAD7;LEF1
GO:0001618_virus_receptor_activity	74	2.7	7.55	0.031292	0.742545	SLC20A2;CLDN1
GO:0001849_complement_component_C1q_complex_binding	8	12.5	38.47	0.0294709	0.742545	PTX3
GO:0003680_minor_groove_of_adenine-thymine-rich_DNA_binding	8	12.5	38.47	0.0294709	0.742545	MEF2C
GO:0003906_DNA-(apurinic_or_apyrimidinic_site)_endonuclease_activity	11	9.09	26.95	0.0402993	0.742545	NEIL1
GO:0004065_arylsulfatase_activity	14	7.14	20.72	0.0510082	0.742545	ARSJ
GO:0004439_phosphatidylinositol-4,5-bisphosphate_5-phosphatase_activity	9	11.11	33.66	0.0330937	0.742545	SYNJ2
GO:0004674_protein_serine/threonine_kinase_activity	358	1.12	3.1	0.0452768	0.742545	MELK;TGFBR2;DSTYK;EIF2AK3
GO:0004713_protein_tyrosine_kinase_activity	86	2.33	6.46	0.0411485	0.742545	DSTYK;WEE1
GO:0005024_transforming_growth_factor_beta-activated_receptor_activity	9	11.11	33.66	0.0330937	0.742545	TGFBR2
GO:0005031_tumor_necrosis_factor-activated_receptor_activity	10	10	29.93	0.0367032	0.742545	TNFRSF19
GO:0005125_cytokine_activity	188	1.6	4.43	0.0334801	0.742545	TNFRSF11B;SECTM1;SPP1
GO:0005149_interleukin-1_receptor_binding	13	7.69	22.45	0.0474518	0.742545	IL1RAP
GO:0005198_structural_molecule_activity	163	1.84	5.13	0.0232537	0.742545	CRYAB;KRT75;CLDN1
GO:0005391_sodium:potassium-exchanging_ATPase_activity	11	9.09	26.95	0.0402993	0.742545	ATP1B2
GO:0005436_sodium:phosphate_symporter_activity	10	10	29.93	0.0367032	0.742545	SLC20A2
GO:0005516_calmodulin_binding	200	1.5	4.16	0.039093	0.742545	RGS4;PDE1C;CNN3
GO:0005524_ATP_binding	1465	0.68	1.93	0.0467785	0.742545	MCM4;MELK;ABCG1;TGFBR2;MCM6;ABCG4;DSTYK;EIF2AK3;ACSS1;WEE1
GO:0008253_5'-nucleotidase_activity	13	7.69	22.45	0.0474518	0.742545	NT5E
GO:0016208_AMP_binding	14	7.14	20.72	0.0510082	0.742545	ACSS1
GO:0019104_DNA_N-glycosylase_activity	9	11.11	33.66	0.0330937	0.742545	NEIL1
GO:0019903_protein_phosphatase_binding	86	2.33	6.46	0.0411485	0.742545	EIF2AK3;CDH2
GO:0031490_chromatin_DNA_binding	69	2.9	8.11	0.0275064	0.742545	GRHL3;HR
GO:0031625_ubiquitin_protein_ligase_binding	296	1.35	3.77	0.0250419	0.742545	SMAD7;PRDX6;PRR5L;BRCA1
GO:0032454_histone_demethylase_activity_(H3-K9_specific)	13	7.69	22.45	0.0474518	0.742545	HR
GO:0034236_protein_kinase_A_catalytic_subunit_binding	13	7.69	22.45	0.0474518	0.742545	EZR
GO:0038023_signaling_receptor_activity	215	1.4	3.86	0.0467379	0.742545	TNFRSF11B;TNFRSF19;SLC20A2
GO:0042043_neurexin_family_protein_binding	14	7.14	20.72	0.0510082	0.742545	SYTL2
GO:0043565_sequence-specific_DNA_binding	309	1.29	3.61	0.0287077	0.742545	GRHL3;ARNTL;MEF2C;LEF1
GO:0044548_S100_protein_binding	14	7.14	20.72	0.0510082	0.742545	EZR
GO:0045294_alpha-catenin_binding	10	10	29.93	0.0367032	0.742545	CDH2
GO:0046790_virion_binding	12	8.33	24.5	0.0438822	0.742545	PTX3
GO:0046872_metal_ion_binding	2301	0.61	1.74	0.0465857	0.742545	CRYAB;ARSJ;PDE1C;TGFBR2;RNF128;HR;NT5E;GMPR;COL11A1;SMAD7;POLA1;PRIM1;MCM10;PDLIM3
GO:0051117_ATPase_binding	88	2.27	6.31	0.0428913	0.742545	EZR;ATP1B2
GO:0070016_armadillo_repeat_domain_binding	10	10	29.93	0.0367032	0.742545	LEF1
GO:0070411_I-SMAD_binding	14	7.14	20.72	0.0510082	0.742545	SMAD7
GO:0000977_RNA_polymerase_II_transcription_regulatory_region_sequence-specific_DNA_binding	388	1.03	2.85	0.0575846	0.747485	MEF2C;HIF3A;NPAS1;LEF1
GO:0008301_DNA_binding,_bending	16	6.25	17.96	0.0580816	0.747485	LEF1
GO:0043395_heparan_sulfate_proteoglycan_binding	16	6.25	17.96	0.0580816	0.747485	FST
GO:0050135_NAD(P)+_nucleosidase_activity	16	6.25	17.96	0.0580816	0.747485	IL1RAP
GO:0051087_chaperone_binding	104	1.92	5.32	0.0577735	0.747485	PDPN;DNAJC1
GO:0061809_NAD+_nucleotidase,_cyclic_ADP-ribose_generating	16	6.25	17.96	0.0580816	0.747485	IL1RAP
GO:0070742_C2H2_zinc_finger_domain_binding	15	6.67	19.24	0.0545514	0.747485	LEF1
GO:0071837_HMG_box_domain_binding	16	6.25	17.96	0.0580816	0.747485	MEF2C
GO:0005543_phospholipid_binding	108	1.85	5.12	0.0617378	0.772157	ANXA1;ABCG1
GO:0043138_3'-5'_DNA_helicase_activity	17	5.88	16.83	0.0615987	0.772157	GINS4
GO:0031435_mitogen-activated_protein_kinase_kinase_kinase_binding	18	5.56	15.84	0.0651028	0.791936	TGFBR2
GO:0070063_RNA_polymerase_binding	18	5.56	15.84	0.0651028	0.791936	BRCA1
GO:0008017_microtubule_binding	251	1.2	3.3	0.0678231	0.813877	CRYAB;EZR;CNN3
GO:0042826_histone_deacetylase_binding	115	1.74	4.8	0.0688902	0.81566	MEF2C;LEF1
GO:0004602_glutathione_peroxidase_activity	20	5	14.18	0.0720722	0.820515	PRDX6
GO:0031418_L-ascorbic_acid_binding	20	5	14.18	0.0720722	0.820515	P3H2
GO:0120020_cholesterol_transfer_activity	20	5	14.18	0.0720722	0.820515	ABCG1
GO:0004114_3',5'-cyclic-nucleotide_phosphodiesterase_activity	21	4.76	13.47	0.0755376	0.838468	PDE1C
GO:0015035_protein_disulfide_oxidoreductase_activity	21	4.76	13.47	0.0755376	0.838468	TXNRD1
GO:0001965_G-protein_alpha-subunit_binding	26	3.85	10.77	0.0926733	0.842383	RGS4
GO:0003677_DNA_binding	1191	0.67	1.88	0.0770677	0.842383	ARNTL;CENPW;IFT57;NPAS1;POLA1;DNAJC1;LEF1;BRCA1
GO:0003682_chromatin_binding	445	0.9	2.48	0.0853911	0.842383	MEF2C;SAMD11;POLA1;LEF1
GO:0003887_DNA-directed_DNA_polymerase_activity	24	4.17	11.71	0.0858571	0.842383	POLA1
GO:0005201_extracellular_matrix_structural_constituent	137	1.46	4.01	0.0929656	0.842383	COL11A1;LAMA4
GO:0005212_structural_constituent_of_eye_lens	24	4.17	11.71	0.0858571	0.842383	CRYAB
GO:0005540_hyaluronic_acid_binding	22	4.55	12.82	0.0789902	0.842383	CEMIP
GO:0017022_myosin_binding	23	4.35	12.24	0.08243	0.842383	HAP1
GO:0019956_chemokine_binding	25	4	11.22	0.0892715	0.842383	PDPN
GO:0034237_protein_kinase_A_regulatory_subunit_binding	26	3.85	10.77	0.0926733	0.842383	EZR
GO:0043027_cysteine-type_endopeptidase_inhibitor_activity_involved_in_apoptotic_process	25	4	11.22	0.0892715	0.842383	LEF1
GO:0043425_bHLH_transcription_factor_binding	26	3.85	10.77	0.0926733	0.842383	ARNTL
GO:0050431_transforming_growth_factor_beta_binding	23	4.35	12.24	0.08243	0.842383	TGFBR2
GO:0051018_protein_kinase_A_binding	24	4.17	11.71	0.0858571	0.842383	EZR
GO:0070412_R-SMAD_binding	23	4.35	12.24	0.08243	0.842383	LDLRAD4
GO:0098632_cell-cell_adhesion_mediator_activity	22	4.55	12.82	0.0789902	0.842383	PALLD
GO:0102567_phospholipase_A2_activity_(consuming_1,2-dipalmitoylphosphatidylcholine)	26	3.85	10.77	0.0926733	0.842383	PRDX6
GO:0102568_phospholipase_A2_activity_consuming_1,2-dioleoylphosphatidylethanolamine)	26	3.85	10.77	0.0926733	0.842383	PRDX6
GO:0005178_integrin_binding	142	1.41	3.87	0.0987371	0.876785	S1PR3;SPP1
GO:0042803_protein_homodimerization_activity	655	0.76	2.11	0.098629	0.876785	CRYAB;ABCG1;FIBIN;ABCG4;TPM4
GO:0004712_protein_serine/threonine/tyrosine_kinase_activity	29	3.45	9.62	0.102803	0.894995	DSTYK
GO:0005184_neuropeptide_hormone_activity	29	3.45	9.62	0.102803	0.894995	CALCB
GO:0017147_Wnt-protein_binding	30	3.33	9.28	0.106155	0.915202	SFRP1
GO:0008289_lipid_binding	152	1.32	3.61	0.11057	0.944097	S1PR3;MELK
GO:0045296_cadherin_binding	315	0.95	2.62	0.113866	0.962977	EZR;CDH2;PRDX6
GO:0097718_disordered_domain_specific_binding	33	3.03	8.41	0.116136	0.972915	EZR
GO:0003700_DNA-binding_transcription_factor_activity	510	0.78	2.16	0.12367	0.989359	GRHL3;MEF2C;NPAS1;LEF1
GO:0005509_calcium_ion_binding	704	0.71	1.96	0.123428	0.989359	ANXA1;MELK;TPM4;CDH2;DSC2
GO:0008083_growth_factor_activity	162	1.23	3.38	0.122753	0.989359	HBEGF;TGFA
GO:0033613_activating_transcription_factor_binding	34	2.94	8.16	0.119439	0.989359	MEF2C
GO:0051219_phosphoprotein_binding	35	2.86	7.92	0.122729	0.989359	PLAT
GO:0042393_histone_binding	164	1.22	3.34	0.125228	0.992882	SAMD11;LEF1
GO:0000014_single-stranded_DNA_endodeoxyribonuclease_activity	9	0	0	1	1
GO:0000030_mannosyltransferase_activity	19	0	0	1	1
GO:0000049_tRNA_binding	66	0	0	1	1
GO:0000062_fatty-acyl-CoA_binding	20	0	0	1	1
GO:0000146_microfilament_motor_activity	28	0	0	1	1
GO:0000149_SNARE_binding	65	0	0	1	1
GO:0000175_3'-5'-exoribonuclease_activity	32	0	0	1	1
GO:0000287_magnesium_ion_binding	216	0.93	2.53	0.192965	1	PGM2;WEE1
GO:0000339_RNA_cap_binding	12	0	0	1	1
GO:0000340_RNA_7-methylguanosine_cap_binding	12	0	0	1	1
GO:0000400_four-way_junction_DNA_binding	17	0	0	1	1
GO:0000774_adenyl-nucleotide_exchange_factor_activity	10	0	0	1	1
GO:0000828_inositol_hexakisphosphate_kinase_activity	8	0	0	1	1
GO:0000900_translation_repressor_activity,_mRNA_regulatory_element_binding	15	0	0	1	1
GO:0000978_RNA_polymerase_II_cis-regulatory_region_sequence-specific_DNA_binding	1080	0.56	1.52	0.216127	1	GRHL3;ARNTL;MEF2C;HIF3A;SMAD7;LEF1
GO:0000979_RNA_polymerase_II_core_promoter_sequence-specific_DNA_binding	24	0	0	1	1
GO:0000981_DNA-binding_transcription_factor_activity,_RNA_polymerase_II-specific	1295	0.54	1.48	0.209301	1	GRHL3;ARNTL;MEF2C;HIF3A;SMAD7;NPAS1;LEF1
GO:0000987_cis-regulatory_region_sequence-specific_DNA_binding	55	1.82	4.98	0.186036	1	LEF1
GO:0000993_RNA_polymerase_II_complex_binding	46	0	0	1	1
GO:0001046_core_promoter_sequence-specific_DNA_binding	18	0	0	1	1
GO:0001085_RNA_polymerase_II_transcription_factor_binding	56	0	0	1	1
GO:0001102_RNA_polymerase_II_activating_transcription_factor_binding	47	0	0	1	1
GO:0001103_RNA_polymerase_II_repressing_transcription_factor_binding	35	0	0	1	1
GO:0001162_RNA_polymerase_II_intronic_transcription_regulatory_region_sequence-specific_DNA_binding	13	0	0	1	1
GO:0001222_transcription_corepressor_binding	12	0	0	1	1
GO:0001223_transcription_coactivator_binding	23	0	0	1	1
GO:0001227_DNA-binding_transcription_repressor_activity,_RNA_polymerase_II-specific	333	0	0	1	1
GO:0001517_N-acetylglucosamine_6-O-sulfotransferase_activity	7	0	0	1	1
GO:0001530_lipopolysaccharide_binding	33	0	0	1	1
GO:0001540_amyloid-beta_binding	77	1.3	3.54	0.250458	1	CRYAB
GO:0001664_G_protein-coupled_receptor_binding	67	0	0	1	1
GO:0001758_retinal_dehydrogenase_activity	8	0	0	1	1
GO:0001784_phosphotyrosine_residue_binding	42	0	0	1	1
GO:0001786_phosphatidylserine_binding	58	1.72	4.72	0.195133	1	SYTL2
GO:0001968_fibronectin_binding	27	0	0	1	1
GO:0001972_retinoic_acid_binding	20	0	0	1	1
GO:0002020_protease_binding	107	0	0	1	1
GO:0002039_p53_binding	66	1.52	4.14	0.218904	1	PTTG1IP
GO:0002161_aminoacyl-tRNA_editing_activity	12	0	0	1	1
GO:0002162_dystroglycan_binding	10	0	0	1	1
GO:0003674_molecular_function	738	0.27	0.72	0.76583	1	FIBIN;PTTG1IP
GO:0003676_nucleic_acid_binding	137	0	0	1	1
GO:0003689_DNA_clamp_loader_activity	9	0	0	1	1
GO:0003690_double-stranded_DNA_binding	101	0.99	2.69	0.314989	1	MCM10
GO:0003691_double-stranded_telomeric_DNA_binding	9	0	0	1	1
GO:0003707_steroid_hormone_receptor_activity	22	0	0	1	1
GO:0003712_transcription_coregulator_activity	114	0.88	2.38	0.347614	1	HR
GO:0003713_transcription_coactivator_activity	239	0.42	1.12	0.592436	1	BRCA1
GO:0003714_transcription_corepressor_activity	194	0.52	1.39	0.5171	1	HR
GO:0003720_telomerase_activity	7	0	0	1	1
GO:0003723_RNA_binding	1385	0.22	0.57	0.895567	1	SYNJ2;EZR;BRCA1
GO:0003724_RNA_helicase_activity	73	0	0	1	1
GO:0003725_double-stranded_RNA_binding	71	0	0	1	1
GO:0003727_single-stranded_RNA_binding	48	2.08	5.73	0.16441	1	ANXA1
GO:0003729_mRNA_binding	202	0	0	1	1
GO:0003730_mRNA_3'-UTR_binding	100	0	0	1	1
GO:0003735_structural_constituent_of_ribosome	177	0	0	1	1
GO:0003743_translation_initiation_factor_activity	51	0	0	1	1
GO:0003746_translation_elongation_factor_activity	18	0	0	1	1
GO:0003755_peptidyl-prolyl_cis-trans_isomerase_activity	38	0	0	1	1
GO:0003756_protein_disulfide_isomerase_activity	19	0	0	1	1
GO:0003774_motor_activity	38	0	0	1	1
GO:0003777_microtubule_motor_activity	66	0	0	1	1
GO:0003785_actin_monomer_binding	28	0	0	1	1
GO:0003796_lysozyme_activity	9	0	0	1	1
GO:0003810_protein-glutamine_gamma-glutamyltransferase_activity	9	0	0	1	1
GO:0003823_antigen_binding	21	0	0	1	1
GO:0003824_catalytic_activity	43	0	0	1	1
GO:0003841_1-acylglycerol-3-phosphate_O-acyltransferase_activity	15	0	0	1	1
GO:0003857_3-hydroxyacyl-CoA_dehydrogenase_activity	8	0	0	1	1
GO:0003899_DNA-directed_5'-3'_RNA_polymerase_activity	37	0	0	1	1
GO:0003924_GTPase_activity	322	0.62	1.68	0.338527	1	RGS4;RAB31
GO:0003950_NAD+_ADP-ribosyltransferase_activity	24	0	0	1	1
GO:0003951_NAD+_kinase_activity	17	0	0	1	1
GO:0003954_NADH_dehydrogenase_activity	7	0	0	1	1
GO:0003993_acid_phosphatase_activity	9	0	0	1	1
GO:0003996_acyl-CoA_ligase_activity	16	0	0	1	1
GO:0004016_adenylate_cyclase_activity	10	0	0	1	1
GO:0004017_adenylate_kinase_activity	9	0	0	1	1
GO:0004024_alcohol_dehydrogenase_activity,_zinc-dependent	7	0	0	1	1
GO:0004029_aldehyde_dehydrogenase_(NAD+)_activity	13	0	0	1	1
GO:0004032_alditol:NADP+_1-oxidoreductase_activity	12	0	0	1	1
GO:0004033_aldo-keto_reductase_(NADP)_activity	12	0	0	1	1
GO:0004089_carbonate_dehydratase_activity	15	0	0	1	1
GO:0004115_3',5'-cyclic-AMP_phosphodiesterase_activity	12	0	0	1	1
GO:0004126_cytidine_deaminase_activity	12	0	0	1	1
GO:0004129_cytochrome-c_oxidase_activity	26	0	0	1	1
GO:0004143_diacylglycerol_kinase_activity	11	0	0	1	1
GO:0004175_endopeptidase_activity	81	0	0	1	1
GO:0004177_aminopeptidase_activity	25	0	0	1	1
GO:0004180_carboxypeptidase_activity	16	0	0	1	1
GO:0004181_metallocarboxypeptidase_activity	29	0	0	1	1
GO:0004190_aspartic-type_endopeptidase_activity	18	0	0	1	1
GO:0004197_cysteine-type_endopeptidase_activity	91	1.1	2.99	0.288798	1	SFRP1
GO:0004198_calcium-dependent_cysteine-type_endopeptidase_activity	12	0	0	1	1
GO:0004222_metalloendopeptidase_activity	108	0	0	1	1
GO:0004252_serine-type_endopeptidase_activity	164	0.61	1.64	0.459375	1	PLAT
GO:0004298_threonine-type_endopeptidase_activity	21	0	0	1	1
GO:0004300_enoyl-CoA_hydratase_activity	10	0	0	1	1
GO:0004303_estradiol_17-beta-dehydrogenase_activity	11	0	0	1	1
GO:0004308_exo-alpha-sialidase_activity	4	0	0	1	1
GO:0004322_ferroxidase_activity	8	0	0	1	1
GO:0004340_glucokinase_activity	5	0	0	1	1
GO:0004364_glutathione_transferase_activity	24	0	0	1	1
GO:0004383_guanylate_cyclase_activity	8	0	0	1	1
GO:0004385_guanylate_kinase_activity	9	0	0	1	1
GO:0004386_helicase_activity	31	0	0	1	1
GO:0004402_histone_acetyltransferase_activity	37	0	0	1	1
GO:0004407_histone_deacetylase_activity	23	0	0	1	1
GO:0004435_phosphatidylinositol_phospholipase_C_activity	26	0	0	1	1
GO:0004438_phosphatidylinositol-3-phosphatase_activity	17	0	0	1	1
GO:0004467_long-chain_fatty_acid-CoA_ligase_activity	13	0	0	1	1
GO:0004497_monooxygenase_activity	35	0	0	1	1
GO:0004518_nuclease_activity	17	0	0	1	1
GO:0004519_endonuclease_activity	33	0	0	1	1
GO:0004520_endodeoxyribonuclease_activity	8	0	0	1	1
GO:0004521_endoribonuclease_activity	31	0	0	1	1
GO:0004523_RNA-DNA_hybrid_ribonuclease_activity	6	0	0	1	1
GO:0004526_ribonuclease_P_activity	12	0	0	1	1
GO:0004527_exonuclease_activity	14	0	0	1	1
GO:0004535_poly(A)-specific_ribonuclease_activity	14	0	0	1	1
GO:0004540_ribonuclease_activity	17	0	0	1	1
GO:0004550_nucleoside_diphosphate_kinase_activity	17	0	0	1	1
GO:0004571_mannosyl-oligosaccharide_1,2-alpha-mannosidase_activity	7	0	0	1	1
GO:0004596_peptide_alpha-N-acetyltransferase_activity	10	0	0	1	1
GO:0004601_peroxidase_activity	33	0	0	1	1
GO:0004620_phospholipase_activity	22	0	0	1	1
GO:0004622_lysophospholipase_activity	24	0	0	1	1
GO:0004623_phospholipase_A2_activity	28	0	0	1	1
GO:0004652_polynucleotide_adenylyltransferase_activity	10	0	0	1	1
GO:0004653_polypeptide_N-acetylgalactosaminyltransferase_activity	19	0	0	1	1
GO:0004672_protein_kinase_activity	209	0.96	2.61	0.183551	1	EIF2AK3;WEE1
GO:0004679_AMP-activated_protein_kinase_activity	10	0	0	1	1
GO:0004683_calmodulin-dependent_protein_kinase_activity	22	0	0	1	1
GO:0004691_cAMP-dependent_protein_kinase_activity	8	0	0	1	1
GO:0004693_cyclin-dependent_protein_serine/threonine_kinase_activity	29	0	0	1	1
GO:0004698_calcium-dependent_protein_kinase_C_activity	16	0	0	1	1
GO:0004706_JUN_kinase_kinase_kinase_activity	8	0	0	1	1
GO:0004707_MAP_kinase_activity	20	0	0	1	1
GO:0004708_MAP_kinase_kinase_activity	18	0	0	1	1
GO:0004709_MAP_kinase_kinase_kinase_activity	17	0	0	1	1
GO:0004714_transmembrane_receptor_protein_tyrosine_kinase_activity	51	0	0	1	1
GO:0004721_phosphoprotein_phosphatase_activity	39	0	0	1	1
GO:0004722_protein_serine/threonine_phosphatase_activity	62	1.61	4.41	0.207107	1	LRRC2
GO:0004724_magnesium-dependent_protein_serine/threonine_phosphatase_activity	12	0	0	1	1
GO:0004725_protein_tyrosine_phosphatase_activity	99	1.01	2.74	0.309828	1	PTPN21
GO:0004726_non-membrane_spanning_protein_tyrosine_phosphatase_activity	9	0	0	1	1
GO:0004745_retinol_dehydrogenase_activity	20	0	0	1	1
GO:0004771_sterol_esterase_activity	9	0	0	1	1
GO:0004806_triglyceride_lipase_activity	27	0	0	1	1
GO:0004842_ubiquitin-protein_transferase_activity	232	0.43	1.16	0.581532	1	BRCA1
GO:0004843_thiol-dependent_ubiquitin-specific_protease_activity	113	0	0	1	1
GO:0004857_enzyme_inhibitor_activity	31	0	0	1	1
GO:0004860_protein_kinase_inhibitor_activity	31	0	0	1	1
GO:0004861_cyclin-dependent_protein_serine/threonine_kinase_inhibitor_activity	12	0	0	1	1
GO:0004864_protein_phosphatase_inhibitor_activity	33	0	0	1	1
GO:0004865_protein_serine/threonine_phosphatase_inhibitor_activity	11	0	0	1	1
GO:0004866_endopeptidase_inhibitor_activity	40	0	0	1	1
GO:0004867_serine-type_endopeptidase_inhibitor_activity	97	0	0	1	1
GO:0004869_cysteine-type_endopeptidase_inhibitor_activity	33	0	0	1	1
GO:0004875_complement_receptor_activity	10	0	0	1	1
GO:0004879_nuclear_receptor_activity	52	0	0	1	1
GO:0004888_transmembrane_signaling_receptor_activity	144	0	0	1	1
GO:0004890_GABA-A_receptor_activity	19	0	0	1	1
GO:0004896_cytokine_receptor_activity	46	0	0	1	1
GO:0004930_G_protein-coupled_receptor_activity	699	0.14	0.38	0.929213	1	S1PR3
GO:0004931_extracellularly_ATP-gated_cation_channel_activity	7	0	0	1	1
GO:0004950_chemokine_receptor_activity	17	0	0	1	1
GO:0004972_NMDA_glutamate_receptor_activity	8	0	0	1	1
GO:0004984_olfactory_receptor_activity	386	0	0	1	1
GO:0004993_G_protein-coupled_serotonin_receptor_activity	32	0	0	1	1
GO:0005000_vasopressin_receptor_activity	7	0	0	1	1
GO:0005001_transmembrane_receptor_protein_tyrosine_phosphatase_activity	17	0	0	1	1
GO:0005005_transmembrane-ephrin_receptor_activity	17	0	0	1	1
GO:0005007_fibroblast_growth_factor-activated_receptor_activity	5	0	0	1	1
GO:0005041_low-density_lipoprotein_particle_receptor_activity	13	0	0	1	1
GO:0005044_scavenger_receptor_activity	47	0	0	1	1
GO:0005049_nuclear_export_signal_receptor_activity	11	0	0	1	1
GO:0005068_transmembrane_receptor_protein_tyrosine_kinase_adaptor_activity	13	0	0	1	1
GO:0005078_MAP-kinase_scaffold_activity	11	0	0	1	1
GO:0005080_protein_kinase_C_binding	55	0	0	1	1
GO:0005085_guanyl-nucleotide_exchange_factor_activity	122	0	0	1	1
GO:0005086_ARF_guanyl-nucleotide_exchange_factor_activity	19	0	0	1	1
GO:0005088_Ras_guanyl-nucleotide_exchange_factor_activity	15	0	0	1	1
GO:0005089_Rho_guanyl-nucleotide_exchange_factor_activity	49	2.04	5.61	0.167534	1	DNMBP
GO:0005092_GDP-dissociation_inhibitor_activity	12	0	0	1	1
GO:0005095_GTPase_inhibitor_activity	14	0	0	1	1
GO:0005096_GTPase_activator_activity	275	0.36	0.97	0.644225	1	RGS4
GO:0005104_fibroblast_growth_factor_receptor_binding	24	0	0	1	1
GO:0005109_frizzled_binding	38	2.63	7.28	0.132527	1	SFRP1
GO:0005112_Notch_binding	26	0	0	1	1
GO:0005113_patched_binding	8	0	0	1	1
GO:0005114_type_II_transforming_growth_factor_beta_receptor_binding	8	0	0	1	1
GO:0005123_death_receptor_binding	15	0	0	1	1
GO:0005126_cytokine_receptor_binding	11	0	0	1	1
GO:0005131_growth_hormone_receptor_binding	9	0	0	1	1
GO:0005132_type_I_interferon_receptor_binding	17	0	0	1	1
GO:0005158_insulin_receptor_binding	23	0	0	1	1
GO:0005159_insulin-like_growth_factor_receptor_binding	16	0	0	1	1
GO:0005160_transforming_growth_factor_beta_receptor_binding	14	0	0	1	1
GO:0005161_platelet-derived_growth_factor_receptor_binding	15	0	0	1	1
GO:0005164_tumor_necrosis_factor_receptor_binding	31	0	0	1	1
GO:0005179_hormone_activity	98	0	0	1	1
GO:0005200_structural_constituent_of_cytoskeleton	102	0	0	1	1
GO:0005215_transporter_activity	40	0	0	1	1
GO:0005216_ion_channel_activity	17	0	0	1	1
GO:0005219_ryanodine-sensitive_calcium-release_channel_activity	4	0	0	1	1
GO:0005227_calcium_activated_cation_channel_activity	14	0	0	1	1
GO:0005229_intracellular_calcium_activated_chloride_channel_activity	16	0	0	1	1
GO:0005237_inhibitory_extracellular_ligand-gated_ion_channel_activity	11	0	0	1	1
GO:0005242_inward_rectifier_potassium_channel_activity	20	0	0	1	1
GO:0005243_gap_junction_channel_activity	21	0	0	1	1
GO:0005244_voltage-gated_ion_channel_activity	45	0	0	1	1
GO:0005245_voltage-gated_calcium_channel_activity	38	0	0	1	1
GO:0005246_calcium_channel_regulator_activity	36	0	0	1	1
GO:0005247_voltage-gated_chloride_channel_activity	11	0	0	1	1
GO:0005248_voltage-gated_sodium_channel_activity	21	0	0	1	1
GO:0005249_voltage-gated_potassium_channel_activity	59	0	0	1	1
GO:0005251_delayed_rectifier_potassium_channel_activity	33	0	0	1	1
GO:0005254_chloride_channel_activity	64	0	0	1	1
GO:0005261_cation_channel_activity	43	0	0	1	1
GO:0005262_calcium_channel_activity	54	0	0	1	1
GO:0005267_potassium_channel_activity	29	0	0	1	1
GO:0005313_L-glutamate_transmembrane_transporter_activity	12	0	0	1	1
GO:0005319_lipid_transporter_activity	25	0	0	1	1
GO:0005324_long-chain_fatty_acid_transporter_activity	17	0	0	1	1
GO:0005326_neurotransmitter_transmembrane_transporter_activity	18	0	0	1	1
GO:0005344_oxygen_carrier_activity	14	0	0	1	1
GO:0005347_ATP_transmembrane_transporter_activity	25	0	0	1	1
GO:0005355_glucose_transmembrane_transporter_activity	14	0	0	1	1
GO:0005381_iron_ion_transmembrane_transporter_activity	9	0	0	1	1
GO:0005385_zinc_ion_transmembrane_transporter_activity	21	0	0	1	1
GO:0005388_calcium_transmembrane_transporter_activity,_phosphorylative_mechanism	9	0	0	1	1
GO:0005412_glucose:sodium_symporter_activity	7	0	0	1	1
GO:0005432_calcium:sodium_antiporter_activity	5	0	0	1	1
GO:0005452_inorganic_anion_exchanger_activity	13	0	0	1	1
GO:0005484_SNAP_receptor_activity	36	0	0	1	1
GO:0005496_steroid_binding	33	0	0	1	1
GO:0005504_fatty_acid_binding	24	0	0	1	1
GO:0005506_iron_ion_binding	128	0.78	2.11	0.38103	1	P3H2
GO:0005507_copper_ion_binding	55	0	0	1	1
GO:0005518_collagen_binding	67	1.49	4.08	0.221826	1	SMAD7
GO:0005520_insulin-like_growth_factor_binding	19	0	0	1	1
GO:0005521_lamin_binding	16	0	0	1	1
GO:0005522_profilin_binding	11	0	0	1	1
GO:0005523_tropomyosin_binding	16	0	0	1	1
GO:0005525_GTP_binding	372	0.27	0.72	0.753538	1	RAB31
GO:0005536_glucose_binding	11	0	0	1	1
GO:0005537_mannose_binding	20	0	0	1	1
GO:0005542_folic_acid_binding	11	0	0	1	1
GO:0005544_calcium-dependent_phospholipid_binding	54	1.85	5.08	0.182981	1	ANXA1
GO:0005545_1-phosphatidylinositol_binding	14	0	0	1	1
GO:0005546_phosphatidylinositol-4,5-bisphosphate_binding	82	1.22	3.32	0.26438	1	SYTL2
GO:0005547_phosphatidylinositol-3,4,5-trisphosphate_binding	39	0	0	1	1
GO:0005549_odorant_binding	92	0	0	1	1
GO:0008009_chemokine_activity	49	0	0	1	1
GO:0008020_G_protein-coupled_photoreceptor_activity	15	0	0	1	1
GO:0008022_protein_C-terminus_binding	189	1.06	2.89	0.157087	1	EZR;NEIL1
GO:0008028_monocarboxylic_acid_transmembrane_transporter_activity	17	0	0	1	1
GO:0008035_high-density_lipoprotein_particle_binding	16	0	0	1	1
GO:0008047_enzyme_activator_activity	52	0	0	1	1
GO:0008061_chitin_binding	8	0	0	1	1
GO:0008066_glutamate_receptor_activity	16	0	0	1	1
GO:0008080_N-acetyltransferase_activity	17	0	0	1	1
GO:0008081_phosphoric_diester_hydrolase_activity	13	0	0	1	1
GO:0008092_cytoskeletal_protein_binding	54	0	0	1	1
GO:0008093_cytoskeletal_anchor_activity	19	0	0	1	1
GO:0008094_DNA-dependent_ATPase_activity	34	0	0	1	1
GO:0008097_5S_rRNA_binding	11	0	0	1	1
GO:0008106_alcohol_dehydrogenase_(NADP+)_activity	11	0	0	1	1
GO:0008134_transcription_factor_binding	313	0.64	1.73	0.326255	1	MEF2C;SMAD7
GO:0008135_translation_factor_activity,_RNA_binding	22	0	0	1	1
GO:0008137_NADH_dehydrogenase_(ubiquinone)_activity	46	0	0	1	1
GO:0008138_protein_tyrosine/serine/threonine_phosphatase_activity	39	0	0	1	1
GO:0008139_nuclear_localization_sequence_binding	26	0	0	1	1
GO:0008140_cAMP_response_element_binding_protein_binding	9	0	0	1	1
GO:0008143_poly(A)_binding	23	0	0	1	1
GO:0008144_drug_binding	72	1.39	3.79	0.236275	1	SFRP1
GO:0008146_sulfotransferase_activity	37	0	0	1	1
GO:0008157_protein_phosphatase_1_binding	30	0	0	1	1
GO:0008168_methyltransferase_activity	52	1.92	5.28	0.176836	1	METTL7B
GO:0008171_O-methyltransferase_activity	9	0	0	1	1
GO:0008173_RNA_methyltransferase_activity	10	0	0	1	1
GO:0008179_adenylate_cyclase_binding	13	0	0	1	1
GO:0008188_neuropeptide_receptor_activity	16	0	0	1	1
GO:0008190_eukaryotic_initiation_factor_4E_binding	10	0	0	1	1
GO:0008191_metalloendopeptidase_inhibitor_activity	16	0	0	1	1
GO:0008194_UDP-glycosyltransferase_activity	12	0	0	1	1
GO:0008195_phosphatidate_phosphatase_activity	13	0	0	1	1
GO:0008198_ferrous_iron_binding	25	0	0	1	1
GO:0008199_ferric_iron_binding	10	0	0	1	1
GO:0008233_peptidase_activity	84	0	0	1	1
GO:0008234_cysteine-type_peptidase_activity	27	0	0	1	1
GO:0008236_serine-type_peptidase_activity	53	0	0	1	1
GO:0008237_metallopeptidase_activity	64	0	0	1	1
GO:0008266_poly(U)_RNA_binding	26	0	0	1	1
GO:0008270_zinc_ion_binding	809	0.25	0.65	0.808761	1	NEIL1;BRCA1
GO:0008271_secondary_active_sulfate_transmembrane_transporter_activity	11	0	0	1	1
GO:0008273_calcium,_potassium:sodium_antiporter_activity	5	0	0	1	1
GO:0008276_protein_methyltransferase_activity	10	0	0	1	1
GO:0008308_voltage-gated_anion_channel_activity	6	0	0	1	1
GO:0008320_protein_transmembrane_transporter_activity	20	0	0	1	1
GO:0008327_methyl-CpG_binding	24	0	0	1	1
GO:0008330_protein_tyrosine/threonine_phosphatase_activity	10	0	0	1	1
GO:0008331_high_voltage-gated_calcium_channel_activity	10	0	0	1	1
GO:0008353_RNA_polymerase_II_CTD_heptapeptide_repeat_kinase_activity	12	0	0	1	1
GO:0008373_sialyltransferase_activity	15	0	0	1	1
GO:0008374_O-acyltransferase_activity	19	0	0	1	1
GO:0008375_acetylglucosaminyltransferase_activity	32	0	0	1	1
GO:0008376_acetylgalactosaminyltransferase_activity	24	0	0	1	1
GO:0008378_galactosyltransferase_activity	10	0	0	1	1
GO:0008381_mechanosensitive_ion_channel_activity	13	0	0	1	1
GO:0008392_arachidonic_acid_epoxygenase_activity	16	0	0	1	1
GO:0008395_steroid_hydroxylase_activity	31	0	0	1	1
GO:0008401_retinoic_acid_4-hydroxylase_activity	10	0	0	1	1
GO:0008408_3'-5'_exonuclease_activity	16	0	0	1	1
GO:0008409_5'-3'_exonuclease_activity	12	0	0	1	1
GO:0008420_RNA_polymerase_II_CTD_heptapeptide_repeat_phosphatase_activity	7	0	0	1	1
GO:0008429_phosphatidylethanolamine_binding	11	0	0	1	1
GO:0008474_palmitoyl-(protein)_hydrolase_activity	13	0	0	1	1
GO:0008494_translation_activator_activity	14	0	0	1	1
GO:0008503_benzodiazepine_receptor_activity	11	0	0	1	1
GO:0008504_monoamine_transmembrane_transporter_activity	9	0	0	1	1
GO:0008510_sodium:bicarbonate_symporter_activity	6	0	0	1	1
GO:0008514_organic_anion_transmembrane_transporter_activity	12	0	0	1	1
GO:0008517_folic_acid_transmembrane_transporter_activity	4	0	0	1	1
GO:0008519_ammonium_transmembrane_transporter_activity	10	0	0	1	1
GO:0008526_phosphatidylinositol_transfer_activity	9	0	0	1	1
GO:0008527_taste_receptor_activity	15	0	0	1	1
GO:0008528_G_protein-coupled_peptide_receptor_activity	43	0	0	1	1
GO:0008532_N-acetyllactosaminide_beta-1,3-N-acetylglucosaminyltransferase_activity	11	0	0	1	1
GO:0008536_Ran_GTPase_binding	39	0	0	1	1
GO:0008553_proton-exporting_ATPase_activity,_phosphorylative_mechanism	14	0	0	1	1
GO:0008568_microtubule-severing_ATPase_activity	9	0	0	1	1
GO:0008569_ATP-dependent_microtubule_motor_activity,_minus-end-directed	18	0	0	1	1
GO:0008574_ATP-dependent_microtubule_motor_activity,_plus-end-directed	16	0	0	1	1
GO:0008603_cAMP-dependent_protein_kinase_regulator_activity	7	0	0	1	1
GO:0008656_cysteine-type_endopeptidase_activator_activity_involved_in_apoptotic_process	17	0	0	1	1
GO:0008757_S-adenosylmethionine-dependent_methyltransferase_activity	12	0	0	1	1
GO:0008821_crossover_junction_endodeoxyribonuclease_activity	6	0	0	1	1
GO:0008970_phospholipase_A1_activity	12	0	0	1	1
GO:0009055_electron_transfer_activity	75	1.33	3.63	0.244816	1	TXNRD1
GO:0009922_fatty_acid_elongase_activity	7	0	0	1	1
GO:0009982_pseudouridine_synthase_activity	13	0	0	1	1
GO:0010181_FMN_binding	16	0	0	1	1
GO:0010314_phosphatidylinositol-5-phosphate_binding	19	0	0	1	1
GO:0015020_glucuronosyltransferase_activity	26	0	0	1	1
GO:0015026_coreceptor_activity	41	0	0	1	1
GO:0015095_magnesium_ion_transmembrane_transporter_activity	16	0	0	1	1
GO:0015101_organic_cation_transmembrane_transporter_activity	6	0	0	1	1
GO:0015106_bicarbonate_transmembrane_transporter_activity	16	0	0	1	1
GO:0015108_chloride_transmembrane_transporter_activity	17	0	0	1	1
GO:0015116_sulfate_transmembrane_transporter_activity	15	0	0	1	1
GO:0015125_bile_acid_transmembrane_transporter_activity	12	0	0	1	1
GO:0015171_amino_acid_transmembrane_transporter_activity	41	0	0	1	1
GO:0015174_basic_amino_acid_transmembrane_transporter_activity	9	0	0	1	1
GO:0015175_neutral_amino_acid_transmembrane_transporter_activity	11	0	0	1	1
GO:0015179_L-amino_acid_transmembrane_transporter_activity	14	0	0	1	1
GO:0015180_L-alanine_transmembrane_transporter_activity	9	0	0	1	1
GO:0015183_L-aspartate_transmembrane_transporter_activity	9	0	0	1	1
GO:0015186_L-glutamine_transmembrane_transporter_activity	8	0	0	1	1
GO:0015187_glycine_transmembrane_transporter_activity	8	0	0	1	1
GO:0015193_L-proline_transmembrane_transporter_activity	7	0	0	1	1
GO:0015220_choline_transmembrane_transporter_activity	5	0	0	1	1
GO:0015232_heme_transmembrane_transporter_activity	8	0	0	1	1
GO:0015248_sterol_transporter_activity	14	0	0	1	1
GO:0015250_water_channel_activity	12	0	0	1	1
GO:0015267_channel_activity	12	0	0	1	1
GO:0015269_calcium-activated_potassium_channel_activity	11	0	0	1	1
GO:0015271_outward_rectifier_potassium_channel_activity	9	0	0	1	1
GO:0015276_ligand-gated_ion_channel_activity	31	0	0	1	1
GO:0015278_calcium-release_channel_activity	9	0	0	1	1
GO:0015279_store-operated_calcium_channel_activity	10	0	0	1	1
GO:0015280_ligand-gated_sodium_channel_activity	11	0	0	1	1
GO:0015293_symporter_activity	54	0	0	1	1
GO:0015297_antiporter_activity	25	0	0	1	1
GO:0015301_anion:anion_antiporter_activity	21	0	0	1	1
GO:0015347_sodium-independent_organic_anion_transmembrane_transporter_activity	16	0	0	1	1
GO:0015379_potassium:chloride_symporter_activity	9	0	0	1	1
GO:0015385_sodium:proton_antiporter_activity	12	0	0	1	1
GO:0015386_potassium:proton_antiporter_activity	11	0	0	1	1
GO:0015459_potassium_channel_regulator_activity	42	0	0	1	1
GO:0015464_acetylcholine_receptor_activity	15	0	0	1	1
GO:0015485_cholesterol_binding	49	2.04	5.61	0.167534	1	ABCG1
GO:0015562_efflux_transmembrane_transporter_activity	14	0	0	1	1
GO:0015631_tubulin_binding	59	1.69	4.64	0.198143	1	BRCA1
GO:0015643_toxic_substance_binding	11	0	0	1	1
GO:0016018_cyclosporin_A_binding	20	0	0	1	1
GO:0016174_NAD(P)H_oxidase_H2O2-forming_activity	9	0	0	1	1
GO:0016175_superoxide-generating_NAD(P)H_oxidase_activity	13	0	0	1	1
GO:0016176_superoxide-generating_NADPH_oxidase_activator_activity	10	0	0	1	1
GO:0016209_antioxidant_activity	18	0	0	1	1
GO:0016251_RNA_polymerase_II_general_transcription_initiation_factor_activity	37	0	0	1	1
GO:0016274_protein-arginine_N-methyltransferase_activity	8	0	0	1	1
GO:0016279_protein-lysine_N-methyltransferase_activity	23	0	0	1	1
GO:0016290_palmitoyl-CoA_hydrolase_activity	14	0	0	1	1
GO:0016298_lipase_activity	15	0	0	1	1
GO:0016301_kinase_activity	85	1.18	3.2	0.27261	1	WEE1
GO:0016303_1-phosphatidylinositol-3-kinase_activity	10	0	0	1	1
GO:0016407_acetyltransferase_activity	17	0	0	1	1
GO:0016409_palmitoyltransferase_activity	18	0	0	1	1
GO:0016410_N-acyltransferase_activity	18	0	0	1	1
GO:0016491_oxidoreductase_activity	136	0.74	1.99	0.399358	1	HR
GO:0016493_C-C_chemokine_receptor_activity	23	0	0	1	1
GO:0016504_peptidase_activator_activity	10	0	0	1	1
GO:0016538_cyclin-dependent_protein_serine/threonine_kinase_regulator_activity	32	0	0	1	1
GO:0016594_glycine_binding	14	0	0	1	1
GO:0016597_amino_acid_binding	18	0	0	1	1
GO:0016616_oxidoreductase_activity,_acting_on_the_CH-OH_group_of_donors,_NAD_or_NADP_as_acceptor	23	0	0	1	1
GO:0016702_oxidoreductase_activity,_acting_on_single_donors_with_incorporation_of_molecular_oxygen,_incorporation_of_two_atoms_of_oxygen	14	0	0	1	1
GO:0016706_2-oxoglutarate-dependent_dioxygenase_activity	19	0	0	1	1
GO:0016709_oxidoreductase_activity,_acting_on_paired_donors,_with_incorporation_or_reduction_of_molecular_oxygen,_NAD(P)H_as_one_donor,_and_incorporation_of_one_atom_of_oxygen	16	0	0	1	1
GO:0016712_oxidoreductase_activity,_acting_on_paired_donors,_with_incorporation_or_reduction_of_molecular_oxygen,_reduced_flavin_or_flavoprotein_as_one_donor,_and_incorporation_of_one_atom_of_oxygen	22	0	0	1	1
GO:0016740_transferase_activity	40	0	0	1	1
GO:0016746_transferase_activity,_transferring_acyl_groups	27	0	0	1	1
GO:0016757_transferase_activity,_transferring_glycosyl_groups	22	0	0	1	1
GO:0016758_transferase_activity,_transferring_hexosyl_groups	17	0	0	1	1
GO:0016773_phosphotransferase_activity,_alcohol_group_as_acceptor	9	0	0	1	1
GO:0016779_nucleotidyltransferase_activity	16	0	0	1	1
GO:0016787_hydrolase_activity	84	0	0	1	1
GO:0016788_hydrolase_activity,_acting_on_ester_bonds	13	0	0	1	1
GO:0016791_phosphatase_activity	54	0	0	1	1
GO:0016805_dipeptidase_activity	11	0	0	1	1
GO:0016829_lyase_activity	15	0	0	1	1
GO:0016836_hydro-lyase_activity	20	0	0	1	1
GO:0016853_isomerase_activity	14	0	0	1	1
GO:0016887_ATPase_activity	218	0.92	2.5	0.195667	1	ABCG1;ABCG4
GO:0016922_nuclear_receptor_binding	20	0	0	1	1
GO:0017016_Ras_GTPase_binding	17	0	0	1	1
GO:0017017_MAP_kinase_tyrosine/serine/threonine_phosphatase_activity	13	0	0	1	1
GO:0017025_TBP-class_protein_binding	26	0	0	1	1
GO:0017040_N-acylsphingosine_amidohydrolase_activity	6	0	0	1	1
GO:0017046_peptide_hormone_binding	40	0	0	1	1
GO:0017048_Rho_GTPase_binding	32	0	0	1	1
GO:0017049_GTP-Rho_binding	22	0	0	1	1
GO:0017056_structural_constituent_of_nuclear_pore	27	0	0	1	1
GO:0017069_snRNA_binding	12	0	0	1	1
GO:0017070_U6_snRNA_binding	14	0	0	1	1
GO:0017075_syntaxin-1_binding	26	0	0	1	1
GO:0017080_sodium_channel_regulator_activity	34	0	0	1	1
GO:0017108_5'-flap_endonuclease_activity	9	0	0	1	1
GO:0017112_Rab_guanyl-nucleotide_exchange_factor_activity	33	0	0	1	1
GO:0017116_single-stranded_DNA_helicase_activity	15	0	0	1	1
GO:0017124_SH3_domain_binding	131	0.76	2.06	0.387967	1	SYNJ2
GO:0017128_phospholipid_scramblase_activity	10	0	0	1	1
GO:0017134_fibroblast_growth_factor_binding	23	0	0	1	1
GO:0017137_Rab_GTPase_binding	150	0.67	1.8	0.430148	1	SYTL2
GO:0017154_semaphorin_receptor_activity	12	0	0	1	1
GO:0017160_Ral_GTPase_binding	12	0	0	1	1
GO:0017166_vinculin_binding	11	0	0	1	1
GO:0018024_histone-lysine_N-methyltransferase_activity	18	0	0	1	1
GO:0019003_GDP_binding	73	1.37	3.73	0.239133	1	RAB31
GO:0019213_deacetylase_activity	14	0	0	1	1
GO:0019215_intermediate_filament_binding	10	0	0	1	1
GO:0019531_oxalate_transmembrane_transporter_activity	10	0	0	1	1
GO:0019706_protein-cysteine_S-palmitoyltransferase_activity	28	0	0	1	1
GO:0019789_SUMO_transferase_activity	16	0	0	1	1
GO:0019825_oxygen_binding	33	0	0	1	1
GO:0019829_ATPase-coupled_cation_transmembrane_transporter_activity	14	0	0	1	1
GO:0019838_growth_factor_binding	31	0	0	1	1
GO:0019841_retinol_binding	13	0	0	1	1
GO:0019843_rRNA_binding	40	0	0	1	1
GO:0019855_calcium_channel_inhibitor_activity	11	0	0	1	1
GO:0019864_IgG_binding	11	0	0	1	1
GO:0019869_chloride_channel_inhibitor_activity	10	0	0	1	1
GO:0019871_sodium_channel_inhibitor_activity	8	0	0	1	1
GO:0019887_protein_kinase_regulator_activity	13	0	0	1	1
GO:0019888_protein_phosphatase_regulator_activity	36	0	0	1	1
GO:0019894_kinesin_binding	43	0	0	1	1
GO:0019899_enzyme_binding	360	0.83	2.28	0.151654	1	EIF2AK3;MCM10;BRCA1
GO:0019900_kinase_binding	97	0	0	1	1
GO:0019901_protein_kinase_binding	463	0.43	1.16	0.517699	1	CDH2;POLA1
GO:0019902_phosphatase_binding	49	2.04	5.61	0.167534	1	SYTL2
GO:0019904_protein_domain_specific_binding	252	0.4	1.06	0.611946	1	EZR
GO:0019905_syntaxin_binding	60	0	0	1	1
GO:0019911_structural_constituent_of_myelin_sheath	10	0	0	1	1
GO:0019955_cytokine_binding	41	0	0	1	1
GO:0019957_C-C_chemokine_binding	24	0	0	1	1
GO:0019992_diacylglycerol_binding	12	0	0	1	1
GO:0020037_heme_binding	138	0	0	1	1
GO:0022841_potassium_ion_leak_channel_activity	16	0	0	1	1
GO:0022848_acetylcholine-gated_cation-selective_channel_activity	16	0	0	1	1
GO:0022851_GABA-gated_chloride_ion_channel_activity	13	0	0	1	1
GO:0022857_transmembrane_transporter_activity	98	0	0	1	1
GO:0023026_MHC_class_II_protein_complex_binding	16	0	0	1	1
GO:0030020_extracellular_matrix_structural_constituent_conferring_tensile_strength	41	2.44	6.73	0.142216	1	COL11A1
GO:0030021_extracellular_matrix_structural_constituent_conferring_compression_resistance	16	0	0	1	1
GO:0030023_extracellular_matrix_constituent_conferring_elasticity	9	0	0	1	1
GO:0030145_manganese_ion_binding	64	0	0	1	1
GO:0030159_signaling_receptor_complex_adaptor_activity	29	0	0	1	1
GO:0030165_PDZ_domain_binding	85	0	0	1	1
GO:0030169_low-density_lipoprotein_particle_binding	17	0	0	1	1
GO:0030170_pyridoxal_phosphate_binding	55	0	0	1	1
GO:0030215_semaphorin_receptor_binding	23	0	0	1	1
GO:0030234_enzyme_regulator_activity	26	0	0	1	1
GO:0030246_carbohydrate_binding	172	1.16	3.18	0.135246	1	UAP1;CHODL
GO:0030247_polysaccharide_binding	13	0	0	1	1
GO:0030276_clathrin_binding	43	0	0	1	1
GO:0030280_structural_constituent_of_skin_epidermis	14	0	0	1	1
GO:0030295_protein_kinase_activator_activity	28	0	0	1	1
GO:0030331_estrogen_receptor_binding	42	2.38	6.57	0.145422	1	LEF1
GO:0030332_cyclin_binding	30	0	0	1	1
GO:0030371_translation_repressor_activity	12	0	0	1	1
GO:0030374_nuclear_receptor_transcription_coactivator_activity	52	0	0	1	1
GO:0030414_peptidase_inhibitor_activity	13	0	0	1	1
GO:0030506_ankyrin_binding	20	0	0	1	1
GO:0030507_spectrin_binding	28	0	0	1	1
GO:0030515_snoRNA_binding	19	0	0	1	1
GO:0030544_Hsp70_protein_binding	42	0	0	1	1
GO:0030552_cAMP_binding	23	0	0	1	1
GO:0030553_cGMP_binding	15	0	0	1	1
GO:0030594_neurotransmitter_receptor_activity	80	0	0	1	1
GO:0030621_U4_snRNA_binding	11	0	0	1	1
GO:0030627_pre-mRNA_5'-splice_site_binding	20	0	0	1	1
GO:0030674_protein-macromolecule_adaptor_activity	76	1.32	3.59	0.247642	1	COL11A1
GO:0030676_Rac_guanyl-nucleotide_exchange_factor_activity	19	0	0	1	1
GO:0030695_GTPase_regulator_activity	16	0	0	1	1
GO:0030742_GTP-dependent_protein_binding	23	0	0	1	1
GO:0030881_beta-2-microglobulin_binding	8	0	0	1	1
GO:0030898_actin-dependent_ATPase_activity	24	0	0	1	1
GO:0030955_potassium_ion_binding	12	0	0	1	1
GO:0030971_receptor_tyrosine_kinase_binding	60	0	0	1	1
GO:0030983_mismatched_DNA_binding	9	0	0	1	1
GO:0031005_filamin_binding	13	0	0	1	1
GO:0031072_heat_shock_protein_binding	64	0	0	1	1
GO:0031210_phosphatidylcholine_binding	28	0	0	1	1
GO:0031267_small_GTPase_binding	20	0	0	1	1
GO:0031369_translation_initiation_factor_binding	22	0	0	1	1
GO:0031386_protein_tag	12	0	0	1	1
GO:0031404_chloride_ion_binding	13	0	0	1	1
GO:0031419_cobalamin_binding	10	0	0	1	1
GO:0031432_titin_binding	14	0	0	1	1
GO:0031434_mitogen-activated_protein_kinase_kinase_binding	13	0	0	1	1
GO:0031489_myosin_V_binding	17	0	0	1	1
GO:0031491_nucleosome_binding	26	0	0	1	1
GO:0031492_nucleosomal_DNA_binding	39	0	0	1	1
GO:0031593_polyubiquitin_modification-dependent_protein_binding	31	0	0	1	1
GO:0031624_ubiquitin_conjugating_enzyme_binding	33	0	0	1	1
GO:0031681_G-protein_beta-subunit_binding	20	0	0	1	1
GO:0031683_G-protein_beta/gamma-subunit_complex_binding	20	0	0	1	1
GO:0031720_haptoglobin_binding	10	0	0	1	1
GO:0031957_very_long-chain_fatty_acid-CoA_ligase_activity	9	0	0	1	1
GO:0031994_insulin-like_growth_factor_I_binding	13	0	0	1	1
GO:0031995_insulin-like_growth_factor_II_binding	8	0	0	1	1
GO:0031996_thioesterase_binding	11	0	0	1	1
GO:0032052_bile_acid_binding	9	0	0	1	1
GO:0032183_SUMO_binding	10	0	0	1	1
GO:0032266_phosphatidylinositol-3-phosphate_binding	48	0	0	1	1
GO:0032395_MHC_class_II_receptor_activity	9	0	0	1	1
GO:0032452_histone_demethylase_activity	14	0	0	1	1
GO:0032794_GTPase_activating_protein_binding	14	0	0	1	1
GO:0032934_sterol_binding	16	0	0	1	1
GO:0033038_bitter_taste_receptor_activity	20	0	0	1	1
GO:0033130_acetylcholine_receptor_binding	12	0	0	1	1
GO:0033192_calmodulin-dependent_protein_phosphatase_activity	5	0	0	1	1
GO:0033204_ribonuclease_P_RNA_binding	10	0	0	1	1
GO:0033558_protein_deacetylase_activity	11	0	0	1	1
GO:0033691_sialic_acid_binding	22	0	0	1	1
GO:0034185_apolipoprotein_binding	16	0	0	1	1
GO:0034450_ubiquitin-ubiquitin_ligase_activity	13	0	0	1	1
GO:0034452_dynactin_binding	12	0	0	1	1
GO:0034987_immunoglobulin_receptor_binding	7	0	0	1	1
GO:0035035_histone_acetyltransferase_binding	28	0	0	1	1
GO:0035064_methylated_histone_binding	63	0	0	1	1
GO:0035091_phosphatidylinositol_binding	82	0	0	1	1
GO:0035197_siRNA_binding	10	0	0	1	1
GO:0035198_miRNA_binding	32	0	0	1	1
GO:0035252_UDP-xylosyltransferase_activity	8	0	0	1	1
GO:0035255_ionotropic_glutamate_receptor_binding	28	0	0	1	1
GO:0035257_nuclear_hormone_receptor_binding	25	0	0	1	1
GO:0035259_glucocorticoid_receptor_binding	15	0	0	1	1
GO:0035497_cAMP_response_element_binding	14	0	0	1	1
GO:0035529_NADH_pyrophosphatase_activity	9	0	0	1	1
GO:0035591_signaling_adaptor_activity	23	0	0	1	1
GO:0035613_RNA_stem-loop_binding	13	0	0	1	1
GO:0035615_clathrin_adaptor_activity	16	0	0	1	1
GO:0035925_mRNA_3'-UTR_AU-rich_region_binding	26	0	0	1	1
GO:0036002_pre-mRNA_binding	15	0	0	1	1
GO:0036094_small_molecule_binding	12	0	0	1	1
GO:0036122_BMP_binding	13	0	0	1	1
GO:0036310_annealing_helicase_activity	7	0	0	1	1
GO:0036312_phosphatidylinositol_3-kinase_regulatory_subunit_binding	10	0	0	1	1
GO:0038024_cargo_receptor_activity	14	0	0	1	1
GO:0038187_pattern_recognition_receptor_activity	13	0	0	1	1
GO:0039706_co-receptor_binding	13	0	0	1	1
GO:0042030_ATPase_inhibitor_activity	5	0	0	1	1
GO:0042054_histone_methyltransferase_activity	19	0	0	1	1
GO:0042056_chemoattractant_activity	35	0	0	1	1
GO:0042162_telomeric_DNA_binding	25	0	0	1	1
GO:0042166_acetylcholine_binding	13	0	0	1	1
GO:0042169_SH2_domain_binding	41	0	0	1	1
GO:0042277_peptide_binding	62	0	0	1	1
GO:0042287_MHC_protein_binding	3	0	0	1	1
GO:0042288_MHC_class_I_protein_binding	22	0	0	1	1
GO:0042289_MHC_class_II_protein_binding	6	0	0	1	1
GO:0042301_phosphate_ion_binding	12	0	0	1	1
GO:0042392_sphingosine-1-phosphate_phosphatase_activity	7	0	0	1	1
GO:0042500_aspartic_endopeptidase_activity,_intramembrane_cleaving	7	0	0	1	1
GO:0042562_hormone_binding	12	0	0	1	1
GO:0042577_lipid_phosphatase_activity	13	0	0	1	1
GO:0042605_peptide_antigen_binding	23	0	0	1	1
GO:0042609_CD4_receptor_binding	9	0	0	1	1
GO:0042626_ATPase-coupled_transmembrane_transporter_activity	44	0	0	1	1
GO:0042800_histone_methyltransferase_activity_(H3-K4_specific)	17	0	0	1	1
GO:0042805_actinin_binding	12	0	0	1	1
GO:0042809_vitamin_D_receptor_binding	15	0	0	1	1
GO:0042813_Wnt-activated_receptor_activity	15	0	0	1	1
GO:0042834_peptidoglycan_binding	17	0	0	1	1
GO:0042910_xenobiotic_transmembrane_transporter_activity	21	0	0	1	1
GO:0042923_neuropeptide_binding	24	0	0	1	1
GO:0042974_retinoic_acid_receptor_binding	13	0	0	1	1
GO:0042975_peroxisome_proliferator_activated_receptor_binding	12	0	0	1	1
GO:0043014_alpha-tubulin_binding	37	0	0	1	1
GO:0043015_gamma-tubulin_binding	28	0	0	1	1
GO:0043021_ribonucleoprotein_complex_binding	34	0	0	1	1
GO:0043022_ribosome_binding	53	0	0	1	1
GO:0043023_ribosomal_large_subunit_binding	12	0	0	1	1
GO:0043024_ribosomal_small_subunit_binding	17	0	0	1	1
GO:0043130_ubiquitin_binding	75	0	0	1	1
GO:0043177_organic_acid_binding	11	0	0	1	1
GO:0043184_vascular_endothelial_growth_factor_receptor_2_binding	9	0	0	1	1
GO:0043236_laminin_binding	25	0	0	1	1
GO:0043274_phospholipase_binding	15	0	0	1	1
GO:0043295_glutathione_binding	12	0	0	1	1
GO:0043325_phosphatidylinositol-3,4-bisphosphate_binding	30	0	0	1	1
GO:0043394_proteoglycan_binding	14	0	0	1	1
GO:0043422_protein_kinase_B_binding	11	0	0	1	1
GO:0043495_protein-membrane_adaptor_activity	18	0	0	1	1
GO:0043522_leucine_zipper_domain_binding	11	0	0	1	1
GO:0043531_ADP_binding	38	2.63	7.28	0.132527	1	ABCG1
GO:0043539_protein_serine/threonine_kinase_activator_activity	30	0	0	1	1
GO:0043548_phosphatidylinositol_3-kinase_binding	21	0	0	1	1
GO:0043560_insulin_receptor_substrate_binding	10	0	0	1	1
GO:0043621_protein_self-association	57	0	0	1	1
GO:0043995_histone_acetyltransferase_activity_(H4-K5_specific)	9	0	0	1	1
GO:0043996_histone_acetyltransferase_activity_(H4-K8_specific)	9	0	0	1	1
GO:0044183_protein_folding_chaperone	27	0	0	1	1
GO:0044325_ion_channel_binding	132	0.76	2.05	0.390262	1	HAP1
GO:0044389_ubiquitin-like_protein_ligase_binding	23	0	0	1	1
GO:0044877_protein-containing_complex_binding	352	0.28	0.76	0.73413	1	CRYAB
GO:0045028_G_protein-coupled_purinergic_nucleotide_receptor_activity	12	0	0	1	1
GO:0045182_translation_regulator_activity	16	0	0	1	1
GO:0045236_CXCR_chemokine_receptor_binding	15	0	0	1	1
GO:0045499_chemorepellent_activity	28	0	0	1	1
GO:0045503_dynein_light_chain_binding	10	0	0	1	1
GO:0045504_dynein_heavy_chain_binding	14	0	0	1	1
GO:0045505_dynein_intermediate_chain_binding	30	0	0	1	1
GO:0046332_SMAD_binding	49	2.04	5.61	0.167534	1	TGFBR2
GO:0046875_ephrin_receptor_binding	27	0	0	1	1
GO:0046914_transition_metal_ion_binding	19	0	0	1	1
GO:0046920_alpha-(1->3)-fucosyltransferase_activity	8	0	0	1	1
GO:0046933_proton-transporting_ATP_synthase_activity,_rotational_mechanism	18	0	0	1	1
GO:0046935_1-phosphatidylinositol-3-kinase_regulator_activity	16	0	0	1	1
GO:0046961_proton-transporting_ATPase_activity,_rotational_mechanism	20	0	0	1	1
GO:0046965_retinoid_X_receptor_binding	18	0	0	1	1
GO:0046966_thyroid_hormone_receptor_binding	30	0	0	1	1
GO:0046972_histone_acetyltransferase_activity_(H4-K16_specific)	10	0	0	1	1
GO:0046974_histone_methyltransferase_activity_(H3-K9_specific)	10	0	0	1	1
GO:0046975_histone_methyltransferase_activity_(H3-K36_specific)	12	0	0	1	1
GO:0046983_protein_dimerization_activity	140	0.71	1.93	0.40832	1	HIF3A
GO:0047184_1-acylglycerophosphocholine_O-acyltransferase_activity	5	0	0	1	1
GO:0047372_acylglycerol_lipase_activity	13	0	0	1	1
GO:0047485_protein_N-terminus_binding	104	0	0	1	1
GO:0047498_calcium-dependent_phospholipase_A2_activity	16	0	0	1	1
GO:0047555_3',5'-cyclic-GMP_phosphodiesterase_activity	10	0	0	1	1
GO:0047617_acyl-CoA_hydrolase_activity	15	0	0	1	1
GO:0047676_arachidonate-CoA_ligase_activity	11	0	0	1	1
GO:0047844_deoxycytidine_deaminase_activity	8	0	0	1	1
GO:0048018_receptor_ligand_activity	36	0	0	1	1
GO:0048019_receptor_antagonist_activity	22	0	0	1	1
GO:0048020_CCR_chemokine_receptor_binding	29	0	0	1	1
GO:0048027_mRNA_5'-UTR_binding	26	0	0	1	1
GO:0048038_quinone_binding	12	0	0	1	1
GO:0048156_tau_protein_binding	45	0	0	1	1
GO:0048306_calcium-dependent_protein_binding	83	1.2	3.28	0.267134	1	ANXA1
GO:0048365_Rac_GTPase_binding	58	0	0	1	1
GO:0048407_platelet-derived_growth_factor_binding	11	0	0	1	1
GO:0048487_beta-tubulin_binding	37	0	0	1	1
GO:0048495_Roundabout_binding	8	0	0	1	1
GO:0050072_m7G(5')pppN_diphosphatase_activity	8	0	0	1	1
GO:0050291_sphingosine_N-acyltransferase_activity	7	0	0	1	1
GO:0050321_tau-protein_kinase_activity	22	0	0	1	1
GO:0050660_flavin_adenine_dinucleotide_binding	58	1.72	4.72	0.195133	1	TXNRD1
GO:0050661_NADP_binding	38	0	0	1	1
GO:0050681_androgen_receptor_binding	28	0	0	1	1
GO:0050699_WW_domain_binding	31	0	0	1	1
GO:0050700_CARD_domain_binding	16	0	0	1	1
GO:0050750_low-density_lipoprotein_particle_receptor_binding	21	0	0	1	1
GO:0050786_RAGE_receptor_binding	11	0	0	1	1
GO:0050811_GABA_receptor_binding	17	0	0	1	1
GO:0050839_cell_adhesion_molecule_binding	65	1.54	4.2	0.215971	1	EZR
GO:0050998_nitric-oxide_synthase_binding	14	0	0	1	1
GO:0051010_microtubule_plus-end_binding	20	0	0	1	1
GO:0051011_microtubule_minus-end_binding	12	0	0	1	1
GO:0051015_actin_filament_binding	206	0.97	2.65	0.179538	1	EZR;TPM4
GO:0051019_mitogen-activated_protein_kinase_binding	29	0	0	1	1
GO:0051020_GTPase_binding	34	0	0	1	1
GO:0051059_NF-kappaB_binding	31	0	0	1	1
GO:0051082_unfolded_protein_binding	112	0.89	2.42	0.342697	1	CRYAB
GO:0051213_dioxygenase_activity	23	0	0	1	1
GO:0051287_NAD_binding	39	0	0	1	1
GO:0051378_serotonin_binding	12	0	0	1	1
GO:0051393_alpha-actinin_binding	15	0	0	1	1
GO:0051428_peptide_hormone_receptor_binding	10	0	0	1	1
GO:0051536_iron-sulfur_cluster_binding	11	0	0	1	1
GO:0051537_2_iron,_2_sulfur_cluster_binding	21	0	0	1	1
GO:0051539_4_iron,_4_sulfur_cluster_binding	42	2.38	6.57	0.145422	1	POLA1
GO:0051721_protein_phosphatase_2A_binding	32	0	0	1	1
GO:0051787_misfolded_protein_binding	27	0	0	1	1
GO:0051864_histone_demethylase_activity_(H3-K36_specific)	10	0	0	1	1
GO:0051959_dynein_light_intermediate_chain_binding	27	0	0	1	1
GO:0052629_phosphatidylinositol-3,5-bisphosphate_3-phosphatase_activity	7	0	0	1	1
GO:0052650_NADP-retinol_dehydrogenase_activity	12	0	0	1	1
GO:0052689_carboxylic_ester_hydrolase_activity	28	0	0	1	1
GO:0052739_phosphatidylserine_1-acylhydrolase_activity	11	0	0	1	1
GO:0052742_phosphatidylinositol_kinase_activity	12	0	0	1	1
GO:0060090_molecular_adaptor_activity	75	0	0	1	1
GO:0061578_Lys63-specific_deubiquitinase_activity	12	0	0	1	1
GO:0061608_nuclear_import_signal_receptor_activity	20	0	0	1	1
GO:0061630_ubiquitin_protein_ligase_activity	286	0.35	0.94	0.658708	1	RNF128
GO:0061631_ubiquitin_conjugating_enzyme_activity	42	0	0	1	1
GO:0061665_SUMO_ligase_activity	8	0	0	1	1
GO:0070006_metalloaminopeptidase_activity	24	0	0	1	1
GO:0070034_telomerase_RNA_binding	22	0	0	1	1
GO:0070064_proline-rich_region_binding	18	0	0	1	1
GO:0070122_isopeptidase_activity	12	0	0	1	1
GO:0070182_DNA_polymerase_binding	20	0	0	1	1
GO:0070273_phosphatidylinositol-4-phosphate_binding	30	0	0	1	1
GO:0070300_phosphatidic_acid_binding	19	0	0	1	1
GO:0070330_aromatase_activity	25	0	0	1	1
GO:0070402_NADPH_binding	15	0	0	1	1
GO:0070403_NAD+_binding	14	0	0	1	1
GO:0070410_co-SMAD_binding	12	0	0	1	1
GO:0070491_repressing_transcription_factor_binding	43	2.33	6.41	0.148616	1	ARNTL
GO:0070492_oligosaccharide_binding	11	0	0	1	1
GO:0070530_K63-linked_polyubiquitin_modification-dependent_protein_binding	21	0	0	1	1
GO:0070577_lysine-acetylated_histone_binding	22	0	0	1	1
GO:0070628_proteasome_binding	17	0	0	1	1
GO:0070679_inositol_1,4,5_trisphosphate_binding	13	0	0	1	1
GO:0070700_BMP_receptor_binding	13	0	0	1	1
GO:0070740_tubulin-glutamic_acid_ligase_activity	10	0	0	1	1
GO:0070840_dynein_complex_binding	23	0	0	1	1
GO:0070851_growth_factor_receptor_binding	10	0	0	1	1
GO:0070888_E-box_binding	50	2	5.49	0.170646	1	ARNTL
GO:0071723_lipopeptide_binding	9	0	0	1	1
GO:0071889_14-3-3_protein_binding	32	0	0	1	1
GO:0071933_Arp2/3_complex_binding	14	0	0	1	1
GO:0071949_FAD_binding	33	0	0	1	1
GO:0072542_protein_phosphatase_activator_activity	11	0	0	1	1
GO:0080025_phosphatidylinositol-3,5-bisphosphate_binding	28	0	0	1	1
GO:0089720_caspase_binding	12	0	0	1	1
GO:0097110_scaffold_protein_binding	60	0	0	1	1
GO:0097153_cysteine-type_endopeptidase_activity_involved_in_apoptotic_process	10	0	0	1	1
GO:0097157_pre-mRNA_intronic_binding	11	0	0	1	1
GO:0097199_cysteine-type_endopeptidase_activity_involved_in_apoptotic_signaling_pathway	10	0	0	1	1
GO:0097200_cysteine-type_endopeptidase_activity_involved_in_execution_phase_of_apoptosis	9	0	0	1	1
GO:0097602_cullin_family_protein_binding	25	0	0	1	1
GO:0098505_G-rich_strand_telomeric_DNA_binding	10	0	0	1	1
GO:0101020_estrogen_16-alpha-hydroxylase_activity	8	0	0	1	1
GO:0102991_myristoyl-CoA_hydrolase_activity	12	0	0	1	1
GO:1901612_cardiolipin_binding	11	0	0	1	1
GO:1901981_phosphatidylinositol_phosphate_binding	16	0	0	1	1
GO:1902282_voltage-gated_potassium_channel_activity_involved_in_ventricular_cardiac_muscle_cell_action_potential_repolarization	12	0	0	1	1
GO:1903231_mRNA_binding_involved_in_posttranscriptional_gene_silencing	274	0	0	1	1
GO:1904047_S-adenosyl-L-methionine_binding	16	0	0	1	1
GO:1904315_transmitter-gated_ion_channel_activity_involved_in_regulation_of_postsynaptic_membrane_potential	35	0	0	1	1
GO:1990247_N6-methyladenosine-containing_RNA_binding	7	0	0	1	1
GO:1990380_Lys48-specific_deubiquitinase_activity	16	0	0	1	1
GO:1990381_ubiquitin-specific_protease_binding	20	0	0	1	1
GO:1990404_protein_ADP-ribosylase_activity	16	0	0	1	1
GO:1990459_transferrin_receptor_binding	11	0	0	1	1
GO:1990756_ubiquitin_ligase-substrate_adaptor_activity	14	0	0	1	1
GO:1990782_protein_tyrosine_kinase_binding	30	0	0	1	1
GO:1990825_sequence-specific_mRNA_binding	12	0	0	1	1
GO:1990837_sequence-specific_double-stranded_DNA_binding	556	0.54	1.46	0.343808	1	ARNTL;MEF2C;LEF1
GO:1990841_promoter-specific_chromatin_binding	58	0	0	1	1

## Sheet: BP_24hrs - ORA_Tt24_vs_NIt24-BP
ORA_Tt24_vs_NIt24-BP_all
geneset	NGenes	pctDE	OR	pvalue	FDR	external_gene_name.DE
GO:0006986_response_to_unfolded_protein	53	16.98	70.78	9.2736e-14	1.34699e-10	HSPA1A;HSPH1;DNAJB1;HSPA8;HSPA1B;HSP90AA1;DNAJA1;HSP90AB1;HSPB1
GO:1900034_regulation_of_cellular_response_to_heat	77	12.99	52.22	6.21969e-14	1.34699e-10	HSPA1A;HSPH1;DNAJB1;BAG3;HSPA8;HSPA1B;HSP90AA1;HSP90AB1;CHORDC1;RPA1
GO:0006260_DNA_replication	130	8.46	32.74	4.09274e-13	3.96313e-10	MCM4;CDK2;MCM3;MCM10;CHAF1B;MCM5;MCM2;CDC6;DTL;MCM6;RPA1
GO:0000082_G1/S_transition_of_mitotic_cell_cycle	100	10	38.87	9.248e-13	5.37309e-10	MCM4;CDK2;MCM3;MCM10;MCM5;MCM2;CDC6;MCM6;RPA1;CCNE1
GO:0000727_double-strand_break_repair_via_break-induced_replication	12	50	332.68	8.32327e-13	5.37309e-10	MCM4;GINS2;MCM3;MCM5;MCM2;MCM6
GO:0006270_DNA_replication_initiation	30	23.33	102.61	5.24e-12	2.53703e-09	MCM3;MCM10;MCM5;MCM2;CDC6;MCM6;CCNE1
GO:0034605_cellular_response_to_heat	51	13.73	53.58	2.82264e-10	1.17139e-07	HSPA1A;CXCL10;BAG3;HSPA1B;HSP90AA1;TCIM;HSP90AB1
GO:0051085_chaperone_cofactor-dependent_protein_refolding	31	16.13	63.24	4.81473e-08	1.74835e-05	HSPA1A;HSPH1;DNAJB1;HSPA8;HSPA1B
GO:0006271_DNA_strand_elongation_involved_in_DNA_replication	13	30.77	144.22	6.9144e-08	2.23181e-05	MCM4;GINS2;MCM3;GINS3
GO:0006268_DNA_unwinding_involved_in_DNA_replication	16	25	108.38	1.74714e-07	4.61404e-05	MCM4;MCM2;MCM6;RPA1
GO:0031396_regulation_of_protein_ubiquitination	16	25	108.38	1.74714e-07	4.61404e-05	HSPA1A;HSPA1B;HSP90AA1;HSP90AB1
GO:0042026_protein_refolding	19	21.05	86.83	3.6936e-07	8.94158e-05	HSPA1A;HSPA8;HSPA1B;HSP90AA1
GO:0006954_inflammatory_response	383	2.61	9.29	4.26839e-07	9.53822e-05	TNFAIP3;RELB;CXCL10;CCL2;CXCL3;SELE;F2RL1;NFKB1;CALCA;PLA2G4C
GO:0071222_cellular_response_to_lipopolysaccharide	167	4.19	14.7	1.14355e-06	0.000237287	TNFAIP3;CXCL10;ICAM1;CCL2;CXCL3;NFKB1;ZFP36
GO:0034620_cellular_response_to_unfolded_protein	26	15.38	59.09	1.40044e-06	0.000271218	HSPA1A;BAG3;HSPA8;HSPA1B
GO:0051301_cell_division	346	2.6	9.14	1.72601e-06	0.000313378	CDK2;TUBB;SPC24;KIF18B;ZWINT;CDC6;KIFC1;PIMREG;CCNE1
GO:0043312_neutrophil_degranulation	482	2.07	7.31	3.37175e-06	0.000576173	DYNLL1;HSPA1A;HSPA8;HSPA1B;HSP90AA1;NFKB1;TUBB;HSP90AB1;GLIPR1;LGALS3
GO:0090084_negative_regulation_of_inclusion_body_assembly	10	30	137.42	3.7679e-06	0.000608097	HSPA1A;DNAJB1;HSPA1B
GO:0071356_cellular_response_to_tumor_necrosis_factor	132	4.55	15.82	4.33826e-06	0.000663298	ICAM1;CCL2;NFKB1;ZFP36;CALCA;HAS2
GO:1903827_regulation_of_cellular_protein_localization	15	20	80.15	1.41216e-05	0.00205117	HSP90AA1;HSP90AB1;CCNE1
GO:0031397_negative_regulation_of_protein_ubiquitination	55	7.27	25.49	2.97614e-05	0.00392986	TNFAIP3;HSPA1A;HSPA1B;DNAJA1
GO:0043066_negative_regulation_of_apoptotic_process	492	1.83	6.35	2.89781e-05	0.00392986	HSPA1A;NFKBIA;BAG3;HSPA1B;TCIM;DNAJA1;NFKB1;BIRC3;HSPB1
GO:0007004_telomere_maintenance_via_telomerase	20	15	56.68	3.49733e-05	0.00441728	HSP90AA1;HSP90AB1;RPA1
GO:0051131_chaperone-mediated_protein_complex_assembly	21	14.29	53.47	4.07076e-05	0.00492731	HSPA1A;HSP90AA1;HSP90AB1
GO:0032703_negative_regulation_of_interleukin-2_production	23	13.04	48.14	5.39543e-05	0.00626949	TNFAIP3;ZFP36;CD34
GO:0000086_G2/M_transition_of_mitotic_cell_cycle	133	3.76	12.81	7.04717e-05	0.00787386	DYNLL1;HSP90AA1;MELK;CDK2;TUBB
GO:0006402_mRNA_catabolic_process	28	10.71	38.54	9.8654e-05	0.0106144	HSPA1A;HSPA1B;ZFP36
GO:0007159_leukocyte_cell-cell_adhesion	29	10.34	37.09	0.000109782	0.0112111	VCAM1;ICAM1;SELE
GO:0030593_neutrophil_chemotaxis	77	5.19	17.79	0.000111918	0.0112111	CXCL10;CCL2;CXCL3;LGALS3
GO:0006974_cellular_response_to_DNA_damage_stimulus	239	2.51	8.52	0.000122536	0.0118655	NFATC2;MCM10;WDR76;XRCC3;DTL;RPA1
GO:0010389_regulation_of_G2/M_transition_of_mitotic_cell_cycle	80	5	17.08	0.000129846	0.0121678	DYNLL1;HSP90AA1;CDK2;TUBB
GO:0071347_cellular_response_to_interleukin-1	82	4.88	16.65	0.000142897	0.0129724	ICAM1;CCL2;NFKB1;HAS2
GO:0046034_ATP_metabolic_process	33	9.09	32.11	0.00016241	0.0139493	HSPA1A;HSPA8;HSPA1B
GO:0051092_positive_regulation_of_NF-kappaB_transcription_factor_activity	159	3.14	10.64	0.000163262	0.0139493	HSPA1A;NFKB2;ICAM1;HSPA1B;NFKB1
GO:0006457_protein_folding	163	3.07	10.37	0.000183302	0.0152141	BAG3;HSPA8;HSP90AA1;DNAJA1;HSP90AB1
GO:0000070_mitotic_sister_chromatid_segregation	35	8.57	30.11	0.000193925	0.0156487	KIF18B;ZWINT;KIFC1
GO:0045944_positive_regulation_of_transcription_by_RNA_polymerase_II	1124	1.07	3.73	0.000243903	0.0191497	RELB;NFKBIA;NFATC2;CXCL10;NFKB2;ATF3;NAMPT;F2RL1;NFKB1;RFX5;NFATC1;MAFF
GO:0045746_negative_regulation_of_Notch_signaling_pathway	39	7.69	26.77	0.000268287	0.0205099	NFKBIA;TCIM;EGF
GO:0019221_cytokine-mediated_signaling_pathway	282	2.13	7.18	0.000299249	0.0222902	VCAM1;CXCL10;ICAM1;CCL2;HSPA8;HSP90AA1
GO:0050821_protein_stabilization	184	2.72	9.15	0.000321054	0.0233166	HSPA1A;BAG3;HSPA1B;HSP90AA1;HSP90AB1
GO:0009408_response_to_heat	42	7.14	24.71	0.000334678	0.0237132	HSP90AA1;DNAJA1;CALCA
GO:0006915_apoptotic_process	542	1.48	5.03	0.000354272	0.0245038	DYNLL1;TNFAIP3;NFKBIA;TCIM;MELK;NFKB1;BIRC3;MCM2
GO:0002548_monocyte_chemotaxis	44	6.82	23.5	0.000384321	0.025964	CCL2;CALCA;LGALS3
GO:0045429_positive_regulation_of_nitric_oxide_biosynthetic_process	45	6.67	22.95	0.000410821	0.0265208	ICAM1;HSP90AA1;HSP90AB1
GO:1904646_cellular_response_to_amyloid-beta	45	6.67	22.95	0.000410821	0.0265208	VCAM1;ICAM1;NAMPT
GO:0007157_heterophilic_cell-cell_adhesion_via_plasma_membrane_cell_adhesion_molecules	47	6.38	21.89	0.000467281	0.0295098	VCAM1;ICAM1;SELE
GO:0043488_regulation_of_mRNA_stability	113	3.54	11.9	0.000487804	0.0301504	HSPA1A;HSPA8;ZFP36;HSPB1
GO:1903265_positive_regulation_of_tumor_necrosis_factor-mediated_signaling_pathway	11	18.18	70.49	0.000549483	0.0325765	HSPA1A;HSPA1B
GO:1904385_cellular_response_to_angiotensin	11	18.18	70.49	0.000549483	0.0325765	NFKB1;CDC6
GO:0032495_response_to_muramyl_dipeptide	12	16.67	63.46	0.000658004	0.0353982	TNFAIP3;NFKBIA
GO:0033173_calcineurin-NFAT_signaling_cascade	12	16.67	63.46	0.000658004	0.0353982	NFATC2;NFATC1
GO:0036297_interstrand_cross-link_repair	52	5.77	19.64	0.000629553	0.0353982	XRCC3;RPA1;FANCI
GO:0036499_PERK-mediated_unfolded_protein_response	12	16.67	63.46	0.000658004	0.0353982	CCL2;ATF3
GO:0071498_cellular_response_to_fluid_shear_stress	12	16.67	63.46	0.000658004	0.0353982	CA2;HAS2
GO:0032757_positive_regulation_of_interleukin-8_production	54	5.56	18.89	0.000703322	0.0371482	HSPA1A;HSPA1B;F2RL1
GO:0050900_leukocyte_migration	130	3.08	10.29	0.000825735	0.042835	ICAM1;SELE;F2RL1;CD34
GO:0048246_macrophage_chemotaxis	14	14.29	52.85	0.000903469	0.0452514	CCL2;LGALS3
GO:1903364_positive_regulation_of_cellular_protein_catabolic_process	14	14.29	52.85	0.000903469	0.0452514	TNFAIP3;HSP90AA1
GO:0035994_response_to_muscle_stretch	15	13.33	48.79	0.00104029	0.0503675	NFKBIA;NFKB1
GO:0045779_negative_regulation_of_bone_resorption	15	13.33	48.79	0.00104029	0.0503675	TNFAIP3;CALCA
GO:0051770_positive_regulation_of_nitric-oxide_synthase_biosynthetic_process	16	12.5	45.33	0.00118643	0.0565012	CCL2;NAMPT
GO:0007249_I-kappaB_kinase/NF-kappaB_signaling	66	4.55	15.28	0.00126207	0.0581788	RELB;NFKBIA;BIRC3
GO:0008284_positive_regulation_of_cell_population_proliferation	512	1.37	4.6	0.00130641	0.0581788	CXCL10;ATF3;NAMPT;CDK2;EGF;CDCA7L;HAS2
GO:0048245_eosinophil_chemotaxis	17	11.76	42.34	0.00134182	0.0581788	CCL2;LGALS3
GO:0051298_centrosome_duplication	17	11.76	42.34	0.00134182	0.0581788	CDK2;CHORDC1
GO:0090280_positive_regulation_of_calcium_ion_import	17	11.76	42.34	0.00134182	0.0581788	CCL2;LGALS3
GO:1901673_regulation_of_mitotic_spindle_assembly	17	11.76	42.34	0.00134182	0.0581788	HSPA1A;HSPA1B
GO:0038061_NIK/NF-kappaB_signaling	70	4.29	14.37	0.00149588	0.0625156	RELB;NFKB2;BIRC3
GO:0061028_establishment_of_endothelial_barrier	18	11.11	39.68	0.0015064	0.0625156	ICAM1;F2RL1
GO:0070098_chemokine-mediated_signaling_pathway	70	4.29	14.37	0.00149588	0.0625156	CXCL10;CCL2;CXCL3
GO:0010824_regulation_of_centrosome_duplication	19	10.53	37.36	0.00168012	0.0650766	XRCC3;CHORDC1
GO:0032508_DNA_duplex_unwinding	72	4.17	13.95	0.00162228	0.0650766	GINS2;MCM3;MCM5
GO:0043254_regulation_of_protein-containing_complex_assembly	19	10.53	37.36	0.00168012	0.0650766	HSPA8;HSP90AA1
GO:0050901_leukocyte_tethering_or_rolling	19	10.53	37.36	0.00168012	0.0650766	VCAM1;SELE
GO:0071354_cellular_response_to_interleukin-6	19	10.53	37.36	0.00168012	0.0650766	ICAM1;NFKB1
GO:0007018_microtubule-based_movement	79	3.8	12.66	0.00211663	0.0809053	KIF18B;KIFC1;KIF4A
GO:0000122_negative_regulation_of_transcription_by_RNA_polymerase_II	894	1.01	3.41	0.00227949	0.0859989	RELB;DNAJB1;NFATC2;ATF3;CDK2;NFKB1;RFX5;ZFP36;CCNE1
GO:0002092_positive_regulation_of_receptor_internalization	23	8.7	30.23	0.00246516	0.0906494	SELE;EGF
GO:0030595_leukocyte_chemotaxis	23	8.7	30.23	0.00246516	0.0906494	CXCL10;CXCL3
GO:0010628_positive_regulation_of_gene_expression	427	1.41	4.68	0.00254196	0.092305	HSPA1A;HSPA1B;ACTG2;ACTA2;CD34;EGF
GO:0046718_viral_entry_into_host_cell	88	3.41	11.32	0.00287697	0.103127	HSPA1A;ICAM1;HSPA1B
GO:0071353_cellular_response_to_interleukin-4	25	8	27.61	0.00291098	0.103127	HSP90AB1;MCM2
GO:0001816_cytokine_production	27	7.41	25.4	0.0033917	0.115916	NFATC2;NFATC1
GO:0048675_axon_extension	27	7.41	25.4	0.0033917	0.115916	HSP90AA1;HSP90AB1
GO:0060271_cilium_assembly	191	2.09	6.92	0.00336927	0.115916	DYNLL2;DYNLL1;MAK;TEKT1
GO:0016032_viral_process	454	1.32	4.4	0.00343695	0.116097	DYNLL1;NFKBIA;HSPA8;HSP90AA1;ZFP36;HSPB1
GO:0097711_ciliary_basal_body-plasma_membrane_docking	95	3.16	10.46	0.00357091	0.119236	DYNLL1;HSP90AA1;TUBB
GO:0061077_chaperone-mediated_protein_folding	28	7.14	24.43	0.00364501	0.120327	HSPB1;CHORDC1
GO:0000083_regulation_of_transcription_involved_in_G1/S_transition_of_mitotic_cell_cycle	29	6.9	23.52	0.00390688	0.122037	CDC6;CCNE1
GO:0010803_regulation_of_tumor_necrosis_factor-mediated_signaling_pathway	29	6.9	23.52	0.00390688	0.122037	TNFAIP3;BIRC3
GO:0019886_antigen_processing_and_presentation_of_exogenous_peptide_antigen_via_MHC_class_II	97	3.09	10.23	0.0037863	0.122037	DYNLL2;DYNLL1;KIF4A
GO:0043122_regulation_of_I-kappaB_kinase/NF-kappaB_signaling	29	6.9	23.52	0.00390688	0.122037	F2RL1;HSPB1
GO:0044344_cellular_response_to_fibroblast_growth_factor_stimulus	29	6.9	23.52	0.00390688	0.122037	CCL2;ZFP36
GO:0038128_ERBB2_signaling_pathway	31	6.45	21.89	0.00445607	0.137711	HSP90AA1;EGF
GO:0045648_positive_regulation_of_erythrocyte_differentiation	33	6.06	20.48	0.00503881	0.154082	HSPA1A;HSPA1B
GO:0031663_lipopolysaccharide-mediated_signaling_pathway	34	5.88	19.83	0.00534263	0.156271	NFKBIA;CCL2
GO:0038095_Fc-epsilon_receptor_signaling_pathway	110	2.73	8.98	0.00537936	0.156271	NFATC2;NFKB1;NFATC1
GO:0051482_positive_regulation_of_cytosolic_calcium_ion_concentration_involved_in_phospholipase_C-activating_G_protein-coupled_signaling_pathway	34	5.88	19.83	0.00534263	0.156271	F2RL1;CALCA
GO:0051973_positive_regulation_of_telomerase_activity	34	5.88	19.83	0.00534263	0.156271	HSP90AA1;HSP90AB1
GO:2000352_negative_regulation_of_endothelial_cell_apoptotic_process	34	5.88	19.83	0.00534263	0.156271	TNFAIP3;ICAM1
GO:0009409_response_to_cold	35	5.71	19.24	0.00565467	0.159484	CXCL10;HSP90AA1
GO:0019985_translesion_synthesis	35	5.71	19.24	0.00565467	0.159484	DTL;RPA1
GO:0030010_establishment_of_cell_polarity	35	5.71	19.24	0.00565467	0.159484	HSP90AA1;HSP90AB1
GO:0006281_DNA_repair	223	1.79	5.9	0.00582203	0.162625	CDK2;CHAF1B;XRCC3;RPA1
GO:2001240_negative_regulation_of_extrinsic_apoptotic_signaling_pathway_in_absence_of_ligand	36	5.56	18.67	0.00597488	0.165305	HSPA1A;HSPA1B
GO:0042769_DNA_damage_response,_detection_of_DNA_damage	37	5.41	18.14	0.00630321	0.172744	DTL;RPA1
GO:0032733_positive_regulation_of_interleukin-10_production	38	5.26	17.63	0.0066396	0.178593	CD83;CD34
GO:1902042_negative_regulation_of_extrinsic_apoptotic_signaling_pathway_via_death_domain_receptors	38	5.26	17.63	0.0066396	0.178593	TNFAIP3;ICAM1
GO:0035556_intracellular_signal_transduction	372	1.34	4.43	0.00698178	0.186074	MELK;HSPB1;NFATC1;MAK;PLA2G4C
GO:0032781_positive_regulation_of_ATPase_activity	40	5	16.7	0.00733634	0.190286	DNAJB1;DNAJA1
GO:0035735_intraciliary_transport_involved_in_cilium_assembly	40	5	16.7	0.00733634	0.190286	DYNLL2;DYNLL1
GO:0042307_positive_regulation_of_protein_import_into_nucleus	40	5	16.7	0.00733634	0.190286	BAG3;HSP90AB1
GO:0007049_cell_cycle	245	1.63	5.36	0.00806462	0.207325	SPC24;CHAF1B;PIMREG;FANCI
GO:0000278_mitotic_cell_cycle	134	2.24	7.33	0.00925023	0.222082	TUBB;KIF18B;CDC6
GO:0000723_telomere_maintenance	44	4.55	15.11	0.00882421	0.222082	RPA1;CCNE1
GO:0030198_extracellular_matrix_organization	254	1.57	5.16	0.00912517	0.222082	VCAM1;NFKB2;ICAM1;COL11A1
GO:0034097_response_to_cytokine	44	4.55	15.11	0.00882421	0.222082	RELB;NFKB2
GO:0035914_skeletal_muscle_cell_differentiation	45	4.44	14.76	0.00921553	0.222082	ATF3;MAFF
GO:0045893_positive_regulation_of_transcription,_DNA-templated	558	1.08	3.55	0.00916887	0.222082	NFATC2;CDK2;NFKB1;ACTA2;EGF;NFATC1
GO:0050918_positive_chemotaxis	45	4.44	14.76	0.00921553	0.222082	CXCL10;LGALS3
GO:0071407_cellular_response_to_organic_cyclic_compound	45	4.44	14.76	0.00921553	0.222082	CCL2;HSP90AB1
GO:0014070_response_to_organic_cyclic_compound	46	4.35	14.43	0.00961449	0.228935	NAMPT;CD83
GO:0000165_MAPK_cascade	260	1.54	5.04	0.00988052	0.233357	CCL2;ZFP36;EGF;MAK
GO:0000281_mitotic_cytokinesis	52	3.85	12.69	0.0121657	0.282731	CEP55;KIF4A
GO:0032481_positive_regulation_of_type_I_interferon_production	52	3.85	12.69	0.0121657	0.282731	NFKB2;NFKB1
GO:0016192_vesicle-mediated_transport	149	2.01	6.58	0.0123172	0.28398	HSPA1A;HSPA8;HSPA1B
GO:0030097_hemopoiesis	53	3.77	12.44	0.0126167	0.28634	MELK;CD34
GO:0050790_regulation_of_catalytic_activity	53	3.77	12.44	0.0126167	0.28634	HSPH1;BAG3
GO:0000079_regulation_of_cyclin-dependent_protein_serine/threonine_kinase_activity	55	3.64	11.97	0.0135403	0.301246	CDC6;CCNE1
GO:0006468_protein_phosphorylation	439	1.14	3.74	0.013597	0.301246	CCL2;MELK;CDK2;MAK;CCNE1
GO:0032720_negative_regulation_of_tumor_necrosis_factor_production	55	3.64	11.97	0.0135403	0.301246	TNFAIP3;CD34
GO:0050776_regulation_of_immune_response	155	1.94	6.31	0.0136883	0.301246	VCAM1;ICAM1;CD34
GO:0060548_negative_regulation_of_cell_death	57	3.51	11.53	0.0144924	0.316545	HSPA1A;HSPA1B
GO:0006959_humoral_immune_response	59	3.39	11.13	0.0154726	0.335433	CCL2;CD83
GO:0006310_DNA_recombination	60	3.33	10.94	0.0159732	0.343719	XRCC3;RPA1
GO:0007568_aging	165	1.82	5.92	0.0161596	0.345174	NFKB2;NAMPT;CALCA
GO:0007165_signal_transduction	1027	0.78	2.59	0.0172877	0.366575	CXCL10;CCL2;NAMPT;CDK2;RSU1;CD83;CD34;EGF
GO:0043547_positive_regulation_of_GTPase_activity	313	1.28	4.17	0.0183503	0.386287	ICAM1;CCL2;F2RL1;RSU1
GO:0051321_meiotic_cell_cycle	65	3.08	10.07	0.0185782	0.388271	CDK2;RPA1
GO:0008217_regulation_of_blood_pressure	66	3.03	9.91	0.0191193	0.391138	ACTA2;CD34
GO:0032922_circadian_regulation_of_gene_expression	66	3.03	9.91	0.0191193	0.391138	RELB;NAMPT
GO:0048511_rhythmic_process	66	3.03	9.91	0.0191193	0.391138	NFKB2;DTL
GO:0051897_positive_regulation_of_protein_kinase_B_signaling	178	1.69	5.48	0.0197236	0.400678	HSP90AA1;HSP90AB1;EGF
GO:0030855_epithelial_cell_differentiation	68	2.94	9.61	0.0202213	0.407937	TAGLN;LGALS3
GO:0061844_antimicrobial_humoral_immune_response_mediated_by_antimicrobial_peptide	69	2.9	9.47	0.0207821	0.416359	CXCL10;CXCL3
GO:0060333_interferon-gamma-mediated_signaling_pathway	70	2.86	9.32	0.0213493	0.424793	VCAM1;ICAM1
GO:0038096_Fc-gamma_receptor_signaling_pathway_involved_in_phagocytosis	71	2.82	9.19	0.021923	0.43324	HSP90AA1;HSP90AB1
GO:0030213_hyaluronan_biosynthetic_process	7	14.29	52.24	0.0222525	0.436781	HAS2
GO:0045732_positive_regulation_of_protein_catabolic_process	72	2.78	9.06	0.022503	0.438733	TNFAIP3;DTL
GO:0031398_positive_regulation_of_protein_ubiquitination	73	2.74	8.93	0.0230894	0.444203	BIRC3;FANCI
GO:0032436_positive_regulation_of_proteasomal_ubiquitin-dependent_protein_catabolic_process	73	2.74	8.93	0.0230894	0.444203	HSPA1A;HSPA1B
GO:0051256_mitotic_spindle_midzone_assembly	8	12.5	44.79	0.0253912	0.485274	KIF4A
GO:0071260_cellular_response_to_mechanical_stimulus	79	2.53	8.23	0.0267376	0.507665	BAG3;NFKB1
GO:0000288_nuclear-transcribed_mRNA_catabolic_process,_deadenylation-dependent_decay	9	11.11	39.22	0.02852	0.529994	ZFP36
GO:0000722_telomere_maintenance_via_recombination	9	11.11	39.22	0.02852	0.529994	XRCC3
GO:0000724_double-strand_break_repair_via_homologous_recombination	82	2.44	7.92	0.0286434	0.529994	XRCC3;RPA1
GO:0090385_phagosome-lysosome_fusion	9	11.11	39.22	0.02852	0.529994	RAB39A
GO:0000076_DNA_replication_checkpoint	10	10	34.86	0.0316388	0.547088	CDC6
GO:0003094_glomerular_filtration	10	10	34.86	0.0316388	0.547088	CD34
GO:0030071_regulation_of_mitotic_metaphase/anaphase_transition	10	10	34.86	0.0316388	0.547088	CDC6
GO:0033314_mitotic_DNA_replication_checkpoint	10	10	34.86	0.0316388	0.547088	CDC6
GO:0035871_protein_K11-linked_deubiquitination	10	10	34.86	0.0316388	0.547088	TNFAIP3
GO:0042129_regulation_of_T_cell_proliferation	10	10	34.86	0.0316388	0.547088	LGALS3
GO:0050727_regulation_of_inflammatory_response	84	2.38	7.73	0.0299434	0.547088	SELE;BIRC3
GO:0070374_positive_regulation_of_ERK1_and_ERK2_cascade	212	1.42	4.58	0.0309358	0.547088	ICAM1;CCL2;F2RL1
GO:0085029_extracellular_matrix_assembly	10	10	34.86	0.0316388	0.547088	HAS2
GO:0140042_lipid_droplet_formation	10	10	34.86	0.0316388	0.547088	PLA2G4C
GO:1901222_regulation_of_NIK/NF-kappaB_signaling	10	10	34.86	0.0316388	0.547088	NFKBIA
GO:0001525_angiogenesis	238	1.26	4.07	0.0413422	0.551542	CCL2;TNFAIP2;EGF
GO:0001818_negative_regulation_of_cytokine_production	15	6.67	22.42	0.0470852	0.551542	NFKB1
GO:0001822_kidney_development	95	2.11	6.81	0.0374981	0.551542	CA2;HAS2
GO:0001935_endothelial_cell_proliferation	15	6.67	22.42	0.0470852	0.551542	CD34
GO:0002523_leukocyte_migration_involved_in_inflammatory_response	11	9.09	31.38	0.0347478	0.551542	SELE
GO:0002690_positive_regulation_of_leukocyte_chemotaxis	13	7.69	26.17	0.0409361	0.551542	F2RL1
GO:0003184_pulmonary_valve_morphogenesis	15	6.67	22.42	0.0470852	0.551542	NFATC1
GO:0006898_receptor-mediated_endocytosis	100	2	6.46	0.0411485	0.551542	HSPH1;HSP90AA1
GO:0006936_muscle_contraction	105	1.9	6.15	0.0449271	0.551542	ACTG2;ACTA2
GO:0006996_organelle_organization	11	9.09	31.38	0.0347478	0.551542	KIF4A
GO:0007019_microtubule_depolymerization	15	6.67	22.42	0.0470852	0.551542	KIF18B
GO:0007160_cell-matrix_adhesion	93	2.15	6.96	0.036075	0.551542	VCAM1;CD34
GO:0007166_cell_surface_receptor_signaling_pathway	232	1.29	4.18	0.0388019	0.551542	CXCL10;CCL2;BIRC3
GO:0007171_activation_of_transmembrane_receptor_protein_tyrosine_kinase_activity	13	7.69	26.17	0.0409361	0.551542	EGF
GO:0007517_muscle_organ_development	90	2.22	7.2	0.0339809	0.551542	CXCL10;TAGLN
GO:0008631_intrinsic_apoptotic_signaling_pathway_in_response_to_oxidative_stress	14	7.14	24.15	0.0440155	0.551542	MELK
GO:0009615_response_to_virus	104	1.92	6.21	0.0441613	0.551542	ACTA2;HSPB1
GO:0009650_UV_protection	13	7.69	26.17	0.0409361	0.551542	SCARA3
GO:0010739_positive_regulation_of_protein_kinase_A_signaling	11	9.09	31.38	0.0347478	0.551542	TCIM
GO:0010745_negative_regulation_of_macrophage_derived_foam_cell_differentiation	13	7.69	26.17	0.0409361	0.551542	NFKBIA
GO:0010818_T_cell_chemotaxis	12	8.33	28.54	0.0378468	0.551542	CXCL10
GO:0010838_positive_regulation_of_keratinocyte_proliferation	14	7.14	24.15	0.0440155	0.551542	HAS2
GO:0010884_positive_regulation_of_lipid_storage	13	7.69	26.17	0.0409361	0.551542	NFKB1
GO:0010996_response_to_auditory_stimulus	14	7.14	24.15	0.0440155	0.551542	CXCL10
GO:0016236_macroautophagy	93	2.15	6.96	0.036075	0.551542	DYNLL2;DYNLL1
GO:0016572_histone_phosphorylation	13	7.69	26.17	0.0409361	0.551542	CDK2
GO:0019079_viral_genome_replication	14	7.14	24.15	0.0440155	0.551542	CCL2
GO:0019725_cellular_homeostasis	13	7.69	26.17	0.0409361	0.551542	CCL2
GO:0030195_negative_regulation_of_blood_coagulation	13	7.69	26.17	0.0409361	0.551542	CD34
GO:0030335_positive_regulation_of_cell_migration	243	1.23	3.99	0.0435221	0.551542	F2RL1;EGF;HAS2
GO:0031274_positive_regulation_of_pseudopodium_assembly	13	7.69	26.17	0.0409361	0.551542	F2RL1
GO:0031669_cellular_response_to_nutrient_levels	14	7.14	24.15	0.0440155	0.551542	ICAM1
GO:0032088_negative_regulation_of_NF-kappaB_transcription_factor_activity	88	2.27	7.37	0.0326125	0.551542	TNFAIP3;NFKBIA
GO:0032230_positive_regulation_of_synaptic_transmission,_GABAergic	13	7.69	26.17	0.0409361	0.551542	CA2
GO:0032482_Rab_protein_signal_transduction	14	7.14	24.15	0.0440155	0.551542	RAB39A
GO:0032516_positive_regulation_of_phosphoprotein_phosphatase_activity	15	6.67	22.42	0.0470852	0.551542	HSP90AB1
GO:0032611_interleukin-1_beta_production	13	7.69	26.17	0.0409361	0.551542	F2RL1
GO:0032688_negative_regulation_of_interferon-beta_production	14	7.14	24.15	0.0440155	0.551542	RELB
GO:0032897_negative_regulation_of_viral_transcription	13	7.69	26.17	0.0409361	0.551542	ZFP36
GO:0033120_positive_regulation_of_RNA_splicing	14	7.14	24.15	0.0440155	0.551542	HSPA1A
GO:0033138_positive_regulation_of_peptidyl-serine_phosphorylation	90	2.22	7.2	0.0339809	0.551542	HSP90AA1;HSP90AB1
GO:0034144_negative_regulation_of_toll-like_receptor_4_signaling_pathway	13	7.69	26.17	0.0409361	0.551542	TNFAIP3
GO:0034356_NAD_biosynthesis_via_nicotinamide_riboside_salvage_pathway	14	7.14	24.15	0.0440155	0.551542	NAMPT
GO:0034599_cellular_response_to_oxidative_stress	94	2.13	6.89	0.0367839	0.551542	HSPA1A;HSPA1B
GO:0035810_positive_regulation_of_urine_volume	14	7.14	24.15	0.0440155	0.551542	HAS2
GO:0042119_neutrophil_activation	12	8.33	28.54	0.0378468	0.551542	F2RL1
GO:0044849_estrous_cycle	15	6.67	22.42	0.0470852	0.551542	HAS2
GO:0045589_regulation_of_regulatory_T_cell_differentiation	15	6.67	22.42	0.0470852	0.551542	NFATC2
GO:0045741_positive_regulation_of_epidermal_growth_factor-activated_receptor_activity	13	7.69	26.17	0.0409361	0.551542	EGF
GO:0045806_negative_regulation_of_endocytosis	15	6.67	22.42	0.0470852	0.551542	LGALS3
GO:0046328_regulation_of_JNK_cascade	15	6.67	22.42	0.0470852	0.551542	F2RL1
GO:0046475_glycerophospholipid_catabolic_process	15	6.67	22.42	0.0470852	0.551542	PLA2G4C
GO:0046688_response_to_copper_ion	14	7.14	24.15	0.0440155	0.551542	ICAM1
GO:0048545_response_to_steroid_hormone	15	6.67	22.42	0.0470852	0.551542	CA2
GO:0050910_detection_of_mechanical_stimulus_involved_in_sensory_perception_of_sound	13	7.69	26.17	0.0409361	0.551542	COL11A1
GO:0050927_positive_regulation_of_positive_chemotaxis	12	8.33	28.54	0.0378468	0.551542	F2RL1
GO:0051549_positive_regulation_of_keratinocyte_migration	12	8.33	28.54	0.0378468	0.551542	HAS2
GO:0051926_negative_regulation_of_calcium_ion_transport	14	7.14	24.15	0.0440155	0.551542	ICAM1
GO:0060100_positive_regulation_of_phagocytosis,_engulfment	12	8.33	28.54	0.0378468	0.551542	F2RL1
GO:0060213_positive_regulation_of_nuclear-transcribed_mRNA_poly(A)_tail_shortening	12	8.33	28.54	0.0378468	0.551542	ZFP36
GO:0060294_cilium_movement_involved_in_cell_motility	13	7.69	26.17	0.0409361	0.551542	TEKT1
GO:0060334_regulation_of_interferon-gamma-mediated_signaling_pathway	13	7.69	26.17	0.0409361	0.551542	HSP90AB1
GO:0060968_regulation_of_gene_silencing	11	9.09	31.38	0.0347478	0.551542	CDK2
GO:0061351_neural_precursor_cell_proliferation	12	8.33	28.54	0.0378468	0.551542	MELK
GO:0061635_regulation_of_protein_complex_stability	11	9.09	31.38	0.0347478	0.551542	HSPA8
GO:0070417_cellular_response_to_cold	11	9.09	31.38	0.0347478	0.551542	NFKBIA
GO:0070498_interleukin-1-mediated_signaling_pathway	96	2.08	6.74	0.0382177	0.551542	NFKBIA;NFKB1
GO:0071425_hematopoietic_stem_cell_proliferation	15	6.67	22.42	0.0470852	0.551542	CD34
GO:0072425_signal_transduction_involved_in_G2_DNA_damage_checkpoint	11	9.09	31.38	0.0347478	0.551542	DTL
GO:0090557_establishment_of_endothelial_intestinal_barrier	11	9.09	31.38	0.0347478	0.551542	ICAM1
GO:0090656_t-circle_formation	12	8.33	28.54	0.0378468	0.551542	XRCC3
GO:0097435_supramolecular_fiber_organization	13	7.69	26.17	0.0409361	0.551542	HSP90AB1
GO:1900153_positive_regulation_of_nuclear-transcribed_mRNA_catabolic_process,_deadenylation-dependent_decay	15	6.67	22.42	0.0470852	0.551542	ZFP36
GO:1901799_negative_regulation_of_proteasomal_protein_catabolic_process	14	7.14	24.15	0.0440155	0.551542	HSP90AB1
GO:1902176_negative_regulation_of_oxidative_stress-induced_intrinsic_apoptotic_signaling_pathway	13	7.69	26.17	0.0409361	0.551542	HSPB1
GO:1904996_positive_regulation_of_leukocyte_adhesion_to_vascular_endothelial_cell	15	6.67	22.42	0.0470852	0.551542	ICAM1
GO:1990440_positive_regulation_of_transcription_from_RNA_polymerase_II_promoter_in_response_to_endoplasmic_reticulum_stress	11	9.09	31.38	0.0347478	0.551542	ATF3
GO:2000406_positive_regulation_of_T_cell_migration	15	6.67	22.42	0.0470852	0.551542	CXCL10
GO:2000637_positive_regulation_of_gene_silencing_by_miRNA	11	9.09	31.38	0.0347478	0.551542	ZFP36
GO:2001214_positive_regulation_of_vasculogenesis	12	8.33	28.54	0.0378468	0.551542	CD34
GO:0006334_nucleosome_assembly	110	1.82	5.86	0.0488289	0.564618	CHAF1B;MCM2
GO:0032270_positive_regulation_of_cellular_protein_metabolic_process	16	6.25	20.92	0.0501451	0.564618	NFKBIA
GO:0033280_response_to_vitamin_D	16	6.25	20.92	0.0501451	0.564618	CXCL10
GO:0042326_negative_regulation_of_phosphorylation	16	6.25	20.92	0.0501451	0.564618	DYNLL1
GO:0043508_negative_regulation_of_JUN_kinase_activity	16	6.25	20.92	0.0501451	0.564618	DNAJA1
GO:0045824_negative_regulation_of_innate_immune_response	16	6.25	20.92	0.0501451	0.564618	TNFAIP3
GO:0050965_detection_of_temperature_stimulus_involved_in_sensory_perception_of_pain	16	6.25	20.92	0.0501451	0.564618	CALCA
GO:0060749_mammary_gland_alveolus_development	16	6.25	20.92	0.0501451	0.564618	EGF
GO:0071732_cellular_response_to_nitric_oxide	16	6.25	20.92	0.0501451	0.564618	CDK2
GO:2000060_positive_regulation_of_ubiquitin-dependent_protein_catabolic_process	16	6.25	20.92	0.0501451	0.564618	EGF
GO:0002223_stimulatory_C-type_lectin_receptor_signaling_pathway	112	1.79	5.76	0.050423	0.565556	RELB;NFKB1
GO:0002063_chondrocyte_development	17	5.88	19.61	0.0531953	0.566052	COL11A1
GO:0007099_centriole_replication	17	5.88	19.61	0.0531953	0.566052	CDK2
GO:0007189_adenylate_cyclase-activating_G_protein-coupled_receptor_signaling_pathway	113	1.77	5.7	0.0512271	0.566052	CXCL10;CALCA
GO:0016579_protein_deubiquitination	262	1.15	3.69	0.0523184	0.566052	TNFAIP3;NFKBIA;BIRC3
GO:0031293_membrane_protein_intracellular_domain_proteolysis	17	5.88	19.61	0.0531953	0.566052	NFKB1
GO:0032609_interferon-gamma_production	17	5.88	19.61	0.0531953	0.566052	F2RL1
GO:0034142_toll-like_receptor_4_signaling_pathway	17	5.88	19.61	0.0531953	0.566052	NFKBIA
GO:0045616_regulation_of_keratinocyte_differentiation	17	5.88	19.61	0.0531953	0.566052	ZFP36
GO:0048265_response_to_pain	17	5.88	19.61	0.0531953	0.566052	CALCA
GO:0050870_positive_regulation_of_T_cell_activation	17	5.88	19.61	0.0531953	0.566052	CCL2
GO:0050921_positive_regulation_of_chemotaxis	17	5.88	19.61	0.0531953	0.566052	F2RL1
GO:0061158_3'-UTR-mediated_mRNA_destabilization	17	5.88	19.61	0.0531953	0.566052	ZFP36
GO:0061952_midbody_abscission	17	5.88	19.61	0.0531953	0.566052	CEP55
GO:1902041_regulation_of_extrinsic_apoptotic_signaling_pathway_via_death_domain_receptors	17	5.88	19.61	0.0531953	0.566052	LGALS3
GO:0002009_morphogenesis_of_an_epithelium	18	5.56	18.46	0.0562358	0.585538	CA2
GO:0006839_mitochondrial_transport	18	5.56	18.46	0.0562358	0.585538	HSP90AA1
GO:0008156_negative_regulation_of_DNA_replication	18	5.56	18.46	0.0562358	0.585538	CDC6
GO:0036149_phosphatidylinositol_acyl-chain_remodeling	18	5.56	18.46	0.0562358	0.585538	PLA2G4C
GO:0043011_myeloid_dendritic_cell_differentiation	18	5.56	18.46	0.0562358	0.585538	RELB
GO:0045638_negative_regulation_of_myeloid_cell_differentiation	18	5.56	18.46	0.0562358	0.585538	NFKBIA
GO:0010744_positive_regulation_of_macrophage_derived_foam_cell_differentiation	19	5.26	17.44	0.0592667	0.589622	NFKB1
GO:0014911_positive_regulation_of_smooth_muscle_cell_migration	19	5.26	17.44	0.0592667	0.589622	HAS2
GO:0030279_negative_regulation_of_ossification	19	5.26	17.44	0.0592667	0.589622	CALCA
GO:0030705_cytoskeleton-dependent_intracellular_transport	19	5.26	17.44	0.0592667	0.589622	TUBB
GO:0032930_positive_regulation_of_superoxide_anion_generation	19	5.26	17.44	0.0592667	0.589622	F2RL1
GO:0033209_tumor_necrosis_factor-mediated_signaling_pathway	122	1.64	5.28	0.0586677	0.589622	NFKBIA;BIRC3
GO:0042267_natural_killer_cell_mediated_cytotoxicity	19	5.26	17.44	0.0592667	0.589622	TUBB
GO:0045780_positive_regulation_of_bone_resorption	19	5.26	17.44	0.0592667	0.589622	CA2
GO:0051726_regulation_of_cell_cycle	121	1.65	5.32	0.0578233	0.589622	HSPA8;DTL
GO:0070935_3'-UTR-mediated_mRNA_stabilization	19	5.26	17.44	0.0592667	0.589622	ZFP36
GO:0090026_positive_regulation_of_monocyte_chemotaxis	19	5.26	17.44	0.0592667	0.589622	CXCL10
GO:1902236_negative_regulation_of_endoplasmic_reticulum_stress-induced_intrinsic_apoptotic_signaling_pathway	19	5.26	17.44	0.0592667	0.589622	HSPA1A
GO:2000010_positive_regulation_of_protein_localization_to_cell_surface	19	5.26	17.44	0.0592667	0.589622	HSP90AB1
GO:0018108_peptidyl-tyrosine_phosphorylation	123	1.63	5.23	0.0595164	0.590086	MELK;EGF
GO:0006935_chemotaxis	124	1.61	5.19	0.0603693	0.596506	CXCL10;CCL2
GO:0002756_MyD88-independent_toll-like_receptor_signaling_pathway	20	5	16.51	0.0622879	0.597183	BIRC3
GO:0007041_lysosomal_transport	20	5	16.51	0.0622879	0.597183	HSPA1A
GO:0010875_positive_regulation_of_cholesterol_efflux	20	5	16.51	0.0622879	0.597183	NFKBIA
GO:0030308_negative_regulation_of_cell_growth	126	1.59	5.1	0.0620879	0.597183	HSPA1A;HSPA1B
GO:0045019_negative_regulation_of_nitric_oxide_biosynthetic_process	20	5	16.51	0.0622879	0.597183	CD34
GO:0046827_positive_regulation_of_protein_export_from_nucleus	20	5	16.51	0.0622879	0.597183	BAG3
GO:0060546_negative_regulation_of_necroptotic_process	20	5	16.51	0.0622879	0.597183	BIRC3
GO:0097755_positive_regulation_of_blood_vessel_diameter	20	5	16.51	0.0622879	0.597183	F2RL1
GO:1901741_positive_regulation_of_myoblast_fusion	20	5	16.51	0.0622879	0.597183	NFATC2
GO:0001502_cartilage_condensation	21	4.76	15.69	0.0652996	0.598408	COL11A1
GO:0001894_tissue_homeostasis	21	4.76	15.69	0.0652996	0.598408	CD34
GO:0006293_nucleotide-excision_repair,_preincision_complex_stabilization	21	4.76	15.69	0.0652996	0.598408	RPA1
GO:0006295_nucleotide-excision_repair,_DNA_incision,_3'-to_lesion	21	4.76	15.69	0.0652996	0.598408	RPA1
GO:0019882_antigen_processing_and_presentation	21	4.76	15.69	0.0652996	0.598408	RELB
GO:0033627_cell_adhesion_mediated_by_integrin	21	4.76	15.69	0.0652996	0.598408	ICAM1
GO:0042276_error-prone_translesion_synthesis	21	4.76	15.69	0.0652996	0.598408	RPA1
GO:0045088_regulation_of_innate_immune_response	21	4.76	15.69	0.0652996	0.598408	BIRC3
GO:0046716_muscle_cell_cellular_homeostasis	21	4.76	15.69	0.0652996	0.598408	BAG3
GO:0050728_negative_regulation_of_inflammatory_response	129	1.55	4.98	0.0646968	0.598408	TNFAIP3;NFKB1
GO:0050807_regulation_of_synapse_organization	21	4.76	15.69	0.0652996	0.598408	TUBB
GO:0050999_regulation_of_nitric-oxide_synthase_activity	21	4.76	15.69	0.0652996	0.598408	HSP90AA1
GO:0090370_negative_regulation_of_cholesterol_efflux	21	4.76	15.69	0.0652996	0.598408	EGF
GO:0099175_regulation_of_postsynapse_organization	21	4.76	15.69	0.0652996	0.598408	HSPA8
GO:0000289_nuclear-transcribed_mRNA_poly(A)_tail_shortening	22	4.55	14.95	0.0683017	0.604928	ZFP36
GO:0006261_DNA-dependent_DNA_replication	22	4.55	14.95	0.0683017	0.604928	RPA1
GO:0014066_regulation_of_phosphatidylinositol_3-kinase_signaling	22	4.55	14.95	0.0683017	0.604928	CEP55
GO:0035584_calcium-mediated_signaling_using_intracellular_calcium_source	22	4.55	14.95	0.0683017	0.604928	VCAM1
GO:0036120_cellular_response_to_platelet-derived_growth_factor_stimulus	22	4.55	14.95	0.0683017	0.604928	HAS2
GO:0044772_mitotic_cell_cycle_phase_transition	22	4.55	14.95	0.0683017	0.604928	CCNE1
GO:0048754_branching_morphogenesis_of_an_epithelial_tube	22	4.55	14.95	0.0683017	0.604928	EGF
GO:0070423_nucleotide-binding_oligomerization_domain_containing_signaling_pathway	22	4.55	14.95	0.0683017	0.604928	TNFAIP3
GO:0070987_error-free_translesion_synthesis	22	4.55	14.95	0.0683017	0.604928	RPA1
GO:0071157_negative_regulation_of_cell_cycle_arrest	22	4.55	14.95	0.0683017	0.604928	HSP90AB1
GO:1901796_regulation_of_signal_transduction_by_p53_class_mediator	131	1.53	4.9	0.0664564	0.604928	CDK2;RPA1
GO:0061024_membrane_organization	134	1.49	4.79	0.0691256	0.610365	HSPA8;EGF
GO:0006297_nucleotide-excision_repair,_DNA_gap_filling	23	4.35	14.27	0.0712943	0.618238	RPA1
GO:0045672_positive_regulation_of_osteoclast_differentiation	23	4.35	14.27	0.0712943	0.618238	CA2
GO:0048026_positive_regulation_of_mRNA_splicing,_via_spliceosome	23	4.35	14.27	0.0712943	0.618238	HSPA8
GO:0050860_negative_regulation_of_T_cell_receptor_signaling_pathway	23	4.35	14.27	0.0712943	0.618238	LGALS3
GO:0071385_cellular_response_to_glucocorticoid_stimulus	23	4.35	14.27	0.0712943	0.618238	ZFP36
GO:2000773_negative_regulation_of_cellular_senescence	23	4.35	14.27	0.0712943	0.618238	NAMPT
GO:0032496_response_to_lipopolysaccharide	138	1.45	4.65	0.0727388	0.628887	NFKB2;SELE
GO:0002286_T_cell_activation_involved_in_immune_response	24	4.17	13.65	0.0742773	0.631545	F2RL1
GO:0007010_cytoskeleton_organization	140	1.43	4.58	0.074568	0.631545	TNFAIP3;CCL2
GO:0008283_cell_population_proliferation	140	1.43	4.58	0.074568	0.631545	MELK;MCM10
GO:0010804_negative_regulation_of_tumor_necrosis_factor-mediated_signaling_pathway	24	4.17	13.65	0.0742773	0.631545	F2RL1
GO:0032201_telomere_maintenance_via_semi-conservative_replication	24	4.17	13.65	0.0742773	0.631545	RPA1
GO:0045662_negative_regulation_of_myoblast_differentiation	24	4.17	13.65	0.0742773	0.631545	CXCL10
GO:0071901_negative_regulation_of_protein_serine/threonine_kinase_activity	24	4.17	13.65	0.0742773	0.631545	HSPB1
GO:0043524_negative_regulation_of_neuron_apoptotic_process	141	1.42	4.55	0.0754881	0.63748	CCL2;HSP90AB1
GO:0007569_cell_aging	25	4	13.07	0.0772509	0.648595	ICAM1
GO:0055010_ventricular_cardiac_muscle_tissue_morphogenesis	25	4	13.07	0.0772509	0.648595	COL11A1
GO:0007605_sensory_perception_of_sound	144	1.39	4.45	0.0782703	0.65526	ICAM1;COL11A1
GO:0007129_homologous_chromosome_pairing_at_meiosis	26	3.85	12.55	0.0802151	0.663888	CCNE1
GO:0032743_positive_regulation_of_interleukin-2_production	26	3.85	12.55	0.0802151	0.663888	CD83
GO:0036152_phosphatidylethanolamine_acyl-chain_remodeling	26	3.85	12.55	0.0802151	0.663888	PLA2G4C
GO:0042327_positive_regulation_of_phosphorylation	26	3.85	12.55	0.0802151	0.663888	EGF
GO:0090263_positive_regulation_of_canonical_Wnt_signaling_pathway	147	1.36	4.36	0.0810846	0.669178	NFKB1;EGF
GO:0003180_aortic_valve_morphogenesis	28	3.57	11.62	0.0861152	0.674298	NFATC1
GO:0006298_mismatch_repair	28	3.57	11.62	0.0861152	0.674298	RPA1
GO:0006446_regulation_of_translational_initiation	28	3.57	11.62	0.0861152	0.674298	HSPB1
GO:0007204_positive_regulation_of_cytosolic_calcium_ion_concentration	151	1.32	4.24	0.0848852	0.674298	F2RL1;CALCA
GO:0007631_feeding_behavior	28	3.57	11.62	0.0861152	0.674298	CALCA
GO:0008360_regulation_of_cell_shape	151	1.32	4.24	0.0848852	0.674298	ICAM1;CCL2
GO:0010033_response_to_organic_substance	27	3.7	12.07	0.0831698	0.674298	XRCC3
GO:0010332_response_to_gamma_radiation	27	3.7	12.07	0.0831698	0.674298	CXCL10
GO:0010971_positive_regulation_of_G2/M_transition_of_mitotic_cell_cycle	27	3.7	12.07	0.0831698	0.674298	DTL
GO:0035987_endodermal_cell_differentiation	28	3.57	11.62	0.0861152	0.674298	COL11A1
GO:0042073_intraciliary_transport	28	3.57	11.62	0.0861152	0.674298	MAK
GO:0045766_positive_regulation_of_angiogenesis	152	1.32	4.22	0.0858438	0.674298	CD34;HSPB1
GO:0045840_positive_regulation_of_mitotic_nuclear_division	28	3.57	11.62	0.0861152	0.674298	EGF
GO:0051403_stress-activated_MAPK_cascade	27	3.7	12.07	0.0831698	0.674298	NFKB1
GO:0051453_regulation_of_intracellular_pH	28	3.57	11.62	0.0861152	0.674298	CA2
GO:0060349_bone_morphogenesis	27	3.7	12.07	0.0831698	0.674298	HAS2
GO:0090383_phagosome_acidification	28	3.57	11.62	0.0861152	0.674298	RAB39A
GO:1905563_negative_regulation_of_vascular_endothelial_cell_proliferation	28	3.57	11.62	0.0861152	0.674298	CCL2
GO:2000353_positive_regulation_of_endothelial_cell_apoptotic_process	27	3.7	12.07	0.0831698	0.674298	CCL2
GO:0001774_microglial_cell_activation	29	3.45	11.21	0.0890512	0.678986	NAMPT
GO:0006294_nucleotide-excision_repair,_preincision_complex_assembly	29	3.45	11.21	0.0890512	0.678986	RPA1
GO:0034113_heterotypic_cell-cell_adhesion	29	3.45	11.21	0.0890512	0.678986	VCAM1
GO:0036151_phosphatidylcholine_acyl-chain_remodeling	29	3.45	11.21	0.0890512	0.678986	PLA2G4C
GO:0045740_positive_regulation_of_DNA_replication	29	3.45	11.21	0.0890512	0.678986	EGF
GO:0046329_negative_regulation_of_JNK_cascade	29	3.45	11.21	0.0890512	0.678986	F2RL1
GO:0046677_response_to_antibiotic	29	3.45	11.21	0.0890512	0.678986	HSP90AA1
GO:0051281_positive_regulation_of_release_of_sequestered_calcium_ion_into_cytosol	29	3.45	11.21	0.0890512	0.678986	CXCL10
GO:0051968_positive_regulation_of_synaptic_transmission,_glutamatergic	29	3.45	11.21	0.0890512	0.678986	CCL2
GO:2000145_regulation_of_cell_motility	29	3.45	11.21	0.0890512	0.678986	EGF
GO:0006284_base-excision_repair	30	3.33	10.82	0.0919779	0.685117	RPA1
GO:0010800_positive_regulation_of_peptidyl-threonine_phosphorylation	30	3.33	10.82	0.0919779	0.685117	EGF
GO:0019369_arachidonic_acid_metabolic_process	30	3.33	10.82	0.0919779	0.685117	PLA2G4C
GO:0030511_positive_regulation_of_transforming_growth_factor_beta_receptor_signaling_pathway	30	3.33	10.82	0.0919779	0.685117	HSP90AB1
GO:0035666_TRIF-dependent_toll-like_receptor_signaling_pathway	30	3.33	10.82	0.0919779	0.685117	BIRC3
GO:0043388_positive_regulation_of_DNA_binding	30	3.33	10.82	0.0919779	0.685117	EGF
GO:0043392_negative_regulation_of_DNA_binding	30	3.33	10.82	0.0919779	0.685117	NFKBIA
GO:0045737_positive_regulation_of_cyclin-dependent_protein_serine/threonine_kinase_activity	30	3.33	10.82	0.0919779	0.685117	CDC6
GO:0070371_ERK1_and_ERK2_cascade	30	3.33	10.82	0.0919779	0.685117	EGF
GO:0007093_mitotic_cell_cycle_checkpoint	31	3.23	10.46	0.0948953	0.690904	ZWINT
GO:0007259_receptor_signaling_pathway_via_JAK-STAT	31	3.23	10.46	0.0948953	0.690904	CCL2
GO:0008089_anterograde_axonal_transport	31	3.23	10.46	0.0948953	0.690904	KIF4A
GO:0010043_response_to_zinc_ion	31	3.23	10.46	0.0948953	0.690904	CA2
GO:0034612_response_to_tumor_necrosis_factor	31	3.23	10.46	0.0948953	0.690904	SELE
GO:0043200_response_to_amino_acid	31	3.23	10.46	0.0948953	0.690904	ICAM1
GO:0045907_positive_regulation_of_vasoconstriction	31	3.23	10.46	0.0948953	0.690904	ICAM1
GO:0070536_protein_K63-linked_deubiquitination	31	3.23	10.46	0.0948953	0.690904	TNFAIP3
GO:0071549_cellular_response_to_dexamethasone_stimulus	31	3.23	10.46	0.0948953	0.690904	ICAM1
GO:0006335_DNA_replication-dependent_nucleosome_assembly	32	3.12	10.12	0.0978034	0.698081	CHAF1B
GO:0021510_spinal_cord_development	32	3.12	10.12	0.0978034	0.698081	BAG3
GO:0032435_negative_regulation_of_proteasomal_ubiquitin-dependent_protein_catabolic_process	32	3.12	10.12	0.0978034	0.698081	HSP90AB1
GO:0032480_negative_regulation_of_type_I_interferon_production	32	3.12	10.12	0.0978034	0.698081	TNFAIP3
GO:0043330_response_to_exogenous_dsRNA	32	3.12	10.12	0.0978034	0.698081	NFKBIA
GO:0048662_negative_regulation_of_smooth_muscle_cell_proliferation	32	3.12	10.12	0.0978034	0.698081	TNFAIP3
GO:0071479_cellular_response_to_ionizing_radiation	32	3.12	10.12	0.0978034	0.698081	NAMPT
GO:0090102_cochlea_development	32	3.12	10.12	0.0978034	0.698081	MCM2
GO:0001975_response_to_amphetamine	33	3.03	9.8	0.100702	0.699857	ICAM1
GO:0007017_microtubule-based_process	33	3.03	9.8	0.100702	0.699857	TUBB
GO:0008625_extrinsic_apoptotic_signaling_pathway_via_death_domain_receptors	33	3.03	9.8	0.100702	0.699857	BAG3
GO:0035025_positive_regulation_of_Rho_protein_signal_transduction	33	3.03	9.8	0.100702	0.699857	F2RL1
GO:0035924_cellular_response_to_vascular_endothelial_growth_factor_stimulus	33	3.03	9.8	0.100702	0.699857	HSPB1
GO:0042127_regulation_of_cell_population_proliferation	166	1.2	3.85	0.0995972	0.699857	NFKBIA;CXCL10
GO:0045736_negative_regulation_of_cyclin-dependent_protein_serine/threonine_kinase_activity	33	3.03	9.8	0.100702	0.699857	TNFAIP3
GO:0048247_lymphocyte_chemotaxis	33	3.03	9.8	0.100702	0.699857	CCL2
GO:0048536_spleen_development	33	3.03	9.8	0.100702	0.699857	NFKB2
GO:0071108_protein_K48-linked_deubiquitination	33	3.03	9.8	0.100702	0.699857	TNFAIP3
GO:0097192_extrinsic_apoptotic_signaling_pathway_in_absence_of_ligand	33	3.03	9.8	0.100702	0.699857	BAG3
GO:0006513_protein_monoubiquitination	34	2.94	9.51	0.103592	0.713116	DTL
GO:0007202_activation_of_phospholipase_C_activity	34	2.94	9.51	0.103592	0.713116	SELE
GO:0008015_blood_circulation	34	2.94	9.51	0.103592	0.713116	CXCL10
GO:0045597_positive_regulation_of_cell_differentiation	34	2.94	9.51	0.103592	0.713116	HSP90AB1
GO:0046777_protein_autophosphorylation	171	1.17	3.74	0.104651	0.718701	MELK;MAK
GO:0008016_regulation_of_heart_contraction	35	2.86	9.23	0.106473	0.724362	CALCA
GO:0042220_response_to_cocaine	35	2.86	9.23	0.106473	0.724362	HSP90AB1
GO:1990090_cellular_response_to_nerve_growth_factor_stimulus	35	2.86	9.23	0.106473	0.724362	CALCA
GO:2001237_negative_regulation_of_extrinsic_apoptotic_signaling_pathway	35	2.86	9.23	0.106473	0.724362	LGALS3
GO:0006730_one-carbon_metabolic_process	36	2.78	8.96	0.109344	0.736993	CA2
GO:0030177_positive_regulation_of_Wnt_signaling_pathway	36	2.78	8.96	0.109344	0.736993	TNFAIP3
GO:0042059_negative_regulation_of_epidermal_growth_factor_receptor_signaling_pathway	36	2.78	8.96	0.109344	0.736993	EGF
GO:0048870_cell_motility	36	2.78	8.96	0.109344	0.736993	CD34
GO:0001890_placenta_development	37	2.7	8.72	0.112206	0.742503	HSP90AB1
GO:0001895_retina_homeostasis	37	2.7	8.72	0.112206	0.742503	HSPB1
GO:0006296_nucleotide-excision_repair,_DNA_incision,_5'-to_lesion	37	2.7	8.72	0.112206	0.742503	RPA1
GO:0007080_mitotic_metaphase_plate_congression	37	2.7	8.72	0.112206	0.742503	KIFC1
GO:0007223_Wnt_signaling_pathway,_calcium_modulating_pathway	37	2.7	8.72	0.112206	0.742503	NFATC1
GO:0010811_positive_regulation_of_cell-substrate_adhesion	37	2.7	8.72	0.112206	0.742503	RSU1
GO:0051225_spindle_assembly	37	2.7	8.72	0.112206	0.742503	TUBB
GO:0070555_response_to_interleukin-1	37	2.7	8.72	0.112206	0.742503	SELE
GO:0033683_nucleotide-excision_repair,_DNA_incision	38	2.63	8.48	0.115059	0.754508	RPA1
GO:0043491_protein_kinase_B_signaling	38	2.63	8.48	0.115059	0.754508	CCL2
GO:0050853_B_cell_receptor_signaling_pathway	38	2.63	8.48	0.115059	0.754508	NFATC2
GO:1900026_positive_regulation_of_substrate_adhesion-dependent_cell_spreading	38	2.63	8.48	0.115059	0.754508	HAS2
GO:0006289_nucleotide-excision_repair	39	2.56	8.26	0.117903	0.76453	RPA1
GO:0006888_endoplasmic_reticulum_to_Golgi_vesicle-mediated_transport	183	1.09	3.49	0.117054	0.76453	DYNLL2;DYNLL1
GO:0007190_activation_of_adenylate_cyclase_activity	39	2.56	8.26	0.117903	0.76453	CALCA
GO:0032467_positive_regulation_of_cytokinesis	39	2.56	8.26	0.117903	0.76453	CDC6
GO:0032691_negative_regulation_of_interleukin-1_beta_production	39	2.56	8.26	0.117903	0.76453	TNFAIP3
GO:0001541_ovarian_follicle_development	40	2.5	8.04	0.120738	0.770868	ICAM1
GO:0007596_blood_coagulation	186	1.08	3.43	0.120211	0.770868	F2RL1;MAFF
GO:0043123_positive_regulation_of_I-kappaB_kinase/NF-kappaB_signaling	185	1.08	3.45	0.119156	0.770868	F2RL1;BIRC3
GO:0045184_establishment_of_protein_localization	40	2.5	8.04	0.120738	0.770868	CEP55
GO:0051028_mRNA_transport	40	2.5	8.04	0.120738	0.770868	ZFP36
GO:0051480_regulation_of_cytosolic_calcium_ion_concentration	40	2.5	8.04	0.120738	0.770868	CALCA
GO:0090307_mitotic_spindle_assembly	40	2.5	8.04	0.120738	0.770868	KIFC1
GO:0030890_positive_regulation_of_B_cell_proliferation	41	2.44	7.84	0.123564	0.783744	NFATC2
GO:0042594_response_to_starvation	41	2.44	7.84	0.123564	0.783744	ZFP36
GO:0045494_photoreceptor_cell_maintenance	41	2.44	7.84	0.123564	0.783744	MAK
GO:0000186_activation_of_MAPKK_activity	42	2.38	7.65	0.126382	0.794672	EGF
GO:0007566_embryo_implantation	42	2.38	7.65	0.126382	0.794672	CALCA
GO:0009411_response_to_UV	42	2.38	7.65	0.126382	0.794672	DTL
GO:0048704_embryonic_skeletal_system_morphogenesis	42	2.38	7.65	0.126382	0.794672	COL11A1
GO:0015701_bicarbonate_transport	43	2.33	7.47	0.12919	0.805356	CA2
GO:0021762_substantia_nigra_development	43	2.33	7.47	0.12919	0.805356	DYNLL1
GO:0070527_platelet_aggregation	43	2.33	7.47	0.12919	0.805356	HSPB1
GO:0071364_cellular_response_to_epidermal_growth_factor_stimulus	43	2.33	7.47	0.12919	0.805356	ZFP36
GO:0001932_regulation_of_protein_phosphorylation	44	2.27	7.3	0.131989	0.817543	HSPB1
GO:0010212_response_to_ionizing_radiation	44	2.27	7.3	0.131989	0.817543	ICAM1
GO:0034198_cellular_response_to_amino_acid_starvation	44	2.27	7.3	0.131989	0.817543	ATF3
GO:0042981_regulation_of_apoptotic_process	199	1.01	3.2	0.134128	0.829026	CXCL10;BIRC3
GO:0006094_gluconeogenesis	45	2.22	7.13	0.134779	0.831281	ATF3
GO:0030900_forebrain_development	46	2.17	6.97	0.137561	0.844849	DNAJB1
GO:0051607_defense_response_to_virus	202	0.99	3.16	0.137391	0.844849	CXCL10;F2RL1
GO:0030178_negative_regulation_of_Wnt_signaling_pathway	47	2.13	6.82	0.140333	0.860059	NFATC1
GO:0030199_collagen_fibril_organization	48	2.08	6.67	0.143097	0.875151	COL11A1
GO:0007173_epidermal_growth_factor_receptor_signaling_pathway	49	2.04	6.53	0.145852	0.886402	EGF
GO:0043536_positive_regulation_of_blood_vessel_endothelial_cell_migration	49	2.04	6.53	0.145852	0.886402	HSPB1
GO:0048146_positive_regulation_of_fibroblast_proliferation	49	2.04	6.53	0.145852	0.886402	CDC6
GO:0007283_spermatogenesis	414	0.72	2.31	0.148045	0.897853	BIRC3;KIFC1;MAK
GO:0007052_mitotic_spindle_organization	50	2	6.4	0.148598	0.899329	KIF4A
GO:0007269_neurotransmitter_secretion	51	1.96	6.27	0.151336	0.906454	HSPA8
GO:0010507_negative_regulation_of_autophagy	51	1.96	6.27	0.151336	0.906454	NAMPT
GO:0030838_positive_regulation_of_actin_filament_polymerization	51	1.96	6.27	0.151336	0.906454	ICAM1
GO:0043124_negative_regulation_of_I-kappaB_kinase/NF-kappaB_signaling	51	1.96	6.27	0.151336	0.906454	TNFAIP3
GO:0071902_positive_regulation_of_protein_serine/threonine_kinase_activity	51	1.96	6.27	0.151336	0.906454	HSP90AB1
GO:0019233_sensory_perception_of_pain	53	1.89	6.03	0.156785	0.933319	CCL2
GO:0032731_positive_regulation_of_interleukin-1_beta_production	53	1.89	6.03	0.156785	0.933319	HSPB1
GO:1901215_negative_regulation_of_neuron_death	53	1.89	6.03	0.156785	0.933319	CD34
GO:0031334_positive_regulation_of_protein-containing_complex_assembly	54	1.85	5.92	0.159496	0.945585	LGALS3
GO:0070936_protein_K48-linked_ubiquitination	54	1.85	5.92	0.159496	0.945585	TNFAIP3
GO:0045600_positive_regulation_of_fat_cell_differentiation	55	1.82	5.81	0.162199	0.9577	ZFP36
GO:0045814_negative_regulation_of_gene_expression,_epigenetic	55	1.82	5.81	0.162199	0.9577	PHF19
GO:0008285_negative_regulation_of_cell_population_proliferation	433	0.69	2.21	0.162551	0.957833	HSPA1A;HSPA1B;CDC6
GO:0006977_DNA_damage_response,_signal_transduction_by_p53_class_mediator_resulting_in_cell_cycle_arrest	56	1.79	5.7	0.164893	0.967588	CDK2
GO:0010468_regulation_of_gene_expression	227	0.88	2.8	0.165206	0.967588	CDK2;MAK
GO:1903078_positive_regulation_of_protein_localization_to_plasma_membrane	56	1.79	5.7	0.164893	0.967588	LGALS3
GO:0000045_autophagosome_assembly	57	1.75	5.6	0.167579	0.971691	BAG3
GO:0006644_phospholipid_metabolic_process	57	1.75	5.6	0.167579	0.971691	PLA2G4C
GO:0007267_cell-cell_signaling	228	0.88	2.79	0.166339	0.971691	CXCL10;NAMPT
GO:0042472_inner_ear_morphogenesis	57	1.75	5.6	0.167579	0.971691	COL11A1
GO:0042475_odontogenesis_of_dentin-containing_tooth	57	1.75	5.6	0.167579	0.971691	CA2
GO:0048661_positive_regulation_of_smooth_muscle_cell_proliferation	58	1.72	5.5	0.170256	0.985248	NAMPT
GO:0016477_cell_migration	232	0.86	2.74	0.170886	0.986925	TNFAIP3;NFATC2
GO:0043406_positive_regulation_of_MAP_kinase_activity	59	1.69	5.41	0.172925	0.996721	EGF
GO:0000002_mitochondrial_genome_maintenance	12	0	0	1	1
GO:0000012_single_strand_break_repair	9	0	0	1	1
GO:0000027_ribosomal_large_subunit_assembly	25	0	0	1	1
GO:0000028_ribosomal_small_subunit_assembly	16	0	0	1	1
GO:0000038_very_long-chain_fatty_acid_metabolic_process	16	0	0	1	1
GO:0000050_urea_cycle	11	0	0	1	1
GO:0000077_DNA_damage_checkpoint	32	0	0	1	1
GO:0000132_establishment_of_mitotic_spindle_orientation	30	0	0	1	1
GO:0000183_rDNA_heterochromatin_assembly	37	0	0	1	1
GO:0000184_nuclear-transcribed_mRNA_catabolic_process,_nonsense-mediated_decay	117	0	0	1	1
GO:0000185_activation_of_MAPKKK_activity	12	0	0	1	1
GO:0000187_activation_of_MAPK_activity	123	0.81	2.56	0.327185	1	EGF
GO:0000188_inactivation_of_MAPK_activity	25	0	0	1	1
GO:0000209_protein_polyubiquitination	270	0.37	1.16	0.582011	1	DTL
GO:0000226_microtubule_cytoskeleton_organization	134	0.75	2.35	0.35067	1	TUBB
GO:0000244_spliceosomal_tri-snRNP_complex_assembly	27	0	0	1	1
GO:0000245_spliceosomal_complex_assembly	26	0	0	1	1
GO:0000266_mitochondrial_fission	19	0	0	1	1
GO:0000290_deadenylation-dependent_decapping_of_nuclear-transcribed_mRNA	10	0	0	1	1
GO:0000302_response_to_reactive_oxygen_species	13	0	0	1	1
GO:0000338_protein_deneddylation	10	0	0	1	1
GO:0000353_formation_of_quadruple_SL/U4/U5/U6_snRNP	12	0	0	1	1
GO:0000375_RNA_splicing,_via_transesterification_reactions	25	0	0	1	1
GO:0000380_alternative_mRNA_splicing,_via_spliceosome	18	0	0	1	1
GO:0000381_regulation_of_alternative_mRNA_splicing,_via_spliceosome	76	0	0	1	1
GO:0000387_spliceosomal_snRNP_assembly	28	0	0	1	1
GO:0000395_mRNA_5'-splice_site_recognition	25	0	0	1	1
GO:0000398_mRNA_splicing,_via_spliceosome	245	0.41	1.28	0.546681	1	HSPA8
GO:0000413_protein_peptidyl-prolyl_isomerization	43	0	0	1	1
GO:0000422_autophagy_of_mitochondrion	37	0	0	1	1
GO:0000423_mitophagy	8	0	0	1	1
GO:0000460_maturation_of_5.8S_rRNA	13	0	0	1	1
GO:0000462_maturation_of_SSU-rRNA_from_tricistronic_rRNA_transcript_(SSU-rRNA,_5.8S_rRNA,_LSU-rRNA)	27	0	0	1	1
GO:0000463_maturation_of_LSU-rRNA_from_tricistronic_rRNA_transcript_(SSU-rRNA,_5.8S_rRNA,_LSU-rRNA)	14	0	0	1	1
GO:0000470_maturation_of_LSU-rRNA	13	0	0	1	1
GO:0000492_box_C/D_snoRNP_assembly	9	0	0	1	1
GO:0000712_resolution_of_meiotic_recombination_intermediates	18	0	0	1	1
GO:0000715_nucleotide-excision_repair,_DNA_damage_recognition	23	0	0	1	1
GO:0000717_nucleotide-excision_repair,_DNA_duplex_unwinding	22	0	0	1	1
GO:0000729_DNA_double-strand_break_processing	15	0	0	1	1
GO:0000731_DNA_synthesis_involved_in_DNA_repair	12	0	0	1	1
GO:0000737_DNA_catabolic_process,_endonucleolytic	11	0	0	1	1
GO:0000902_cell_morphogenesis	81	0	0	1	1
GO:0000956_nuclear-transcribed_mRNA_catabolic_process	15	0	0	1	1
GO:0001501_skeletal_system_development	136	0	0	1	1
GO:0001503_ossification	77	1.3	4.12	0.219536	1	COL11A1
GO:0001504_neurotransmitter_uptake	12	0	0	1	1
GO:0001508_action_potential	18	0	0	1	1
GO:0001510_RNA_methylation	19	0	0	1	1
GO:0001516_prostaglandin_biosynthetic_process	16	0	0	1	1
GO:0001523_retinoid_metabolic_process	64	0	0	1	1
GO:0001556_oocyte_maturation	20	0	0	1	1
GO:0001558_regulation_of_cell_growth	66	0	0	1	1
GO:0001561_fatty_acid_alpha-oxidation	9	0	0	1	1
GO:0001568_blood_vessel_development	43	0	0	1	1
GO:0001569_branching_involved_in_blood_vessel_morphogenesis	32	0	0	1	1
GO:0001570_vasculogenesis	62	1.61	5.14	0.18088	1	HAS2
GO:0001574_ganglioside_biosynthetic_process	11	0	0	1	1
GO:0001578_microtubule_bundle_formation	31	0	0	1	1
GO:0001580_detection_of_chemical_stimulus_involved_in_sensory_perception_of_bitter_taste	36	0	0	1	1
GO:0001649_osteoblast_differentiation	106	0	0	1	1
GO:0001654_eye_development	42	0	0	1	1
GO:0001655_urogenital_system_development	12	0	0	1	1
GO:0001656_metanephros_development	29	0	0	1	1
GO:0001657_ureteric_bud_development	37	0	0	1	1
GO:0001658_branching_involved_in_ureteric_bud_morphogenesis	42	0	0	1	1
GO:0001659_temperature_homeostasis	20	0	0	1	1
GO:0001662_behavioral_fear_response	31	0	0	1	1
GO:0001666_response_to_hypoxia	163	0	0	1	1
GO:0001675_acrosome_assembly	18	0	0	1	1
GO:0001676_long-chain_fatty_acid_metabolic_process	22	0	0	1	1
GO:0001678_cellular_glucose_homeostasis	22	0	0	1	1
GO:0001682_tRNA_5'-leader_removal	13	0	0	1	1
GO:0001701_in_utero_embryonic_development	202	0.5	1.55	0.47888	1	MAFF
GO:0001702_gastrulation_with_mouth_forming_second	17	0	0	1	1
GO:0001706_endoderm_formation	12	0	0	1	1
GO:0001707_mesoderm_formation	32	0	0	1	1
GO:0001708_cell_fate_specification	34	0	0	1	1
GO:0001709_cell_fate_determination	17	0	0	1	1
GO:0001731_formation_of_translation_preinitiation_complex	10	0	0	1	1
GO:0001732_formation_of_cytoplasmic_translation_initiation_complex	16	0	0	1	1
GO:0001736_establishment_of_planar_polarity	14	0	0	1	1
GO:0001755_neural_crest_cell_migration	46	0	0	1	1
GO:0001756_somitogenesis	44	0	0	1	1
GO:0001764_neuron_migration	110	0	0	1	1
GO:0001771_immunological_synapse_formation	11	0	0	1	1
GO:0001778_plasma_membrane_repair	12	0	0	1	1
GO:0001779_natural_killer_cell_differentiation	12	0	0	1	1
GO:0001782_B_cell_homeostasis	22	0	0	1	1
GO:0001817_regulation_of_cytokine_production	33	0	0	1	1
GO:0001819_positive_regulation_of_cytokine_production	26	0	0	1	1
GO:0001823_mesonephros_development	11	0	0	1	1
GO:0001824_blastocyst_development	19	0	0	1	1
GO:0001825_blastocyst_formation	18	0	0	1	1
GO:0001829_trophectodermal_cell_differentiation	13	0	0	1	1
GO:0001833_inner_cell_mass_cell_proliferation	13	0	0	1	1
GO:0001835_blastocyst_hatching	29	0	0	1	1
GO:0001836_release_of_cytochrome_c_from_mitochondria	22	0	0	1	1
GO:0001837_epithelial_to_mesenchymal_transition	42	0	0	1	1
GO:0001843_neural_tube_closure	78	0	0	1	1
GO:0001867_complement_activation,_lectin_pathway	10	0	0	1	1
GO:0001881_receptor_recycling	11	0	0	1	1
GO:0001886_endothelial_cell_morphogenesis	14	0	0	1	1
GO:0001889_liver_development	76	0	0	1	1
GO:0001892_embryonic_placenta_development	19	0	0	1	1
GO:0001893_maternal_placenta_development	11	0	0	1	1
GO:0001916_positive_regulation_of_T_cell_mediated_cytotoxicity	24	0	0	1	1
GO:0001921_positive_regulation_of_receptor_recycling	14	0	0	1	1
GO:0001933_negative_regulation_of_protein_phosphorylation	72	0	0	1	1
GO:0001934_positive_regulation_of_protein_phosphorylation	185	0.54	1.7	0.449392	1	HSP90AA1
GO:0001937_negative_regulation_of_endothelial_cell_proliferation	38	0	0	1	1
GO:0001938_positive_regulation_of_endothelial_cell_proliferation	73	0	0	1	1
GO:0001942_hair_follicle_development	37	0	0	1	1
GO:0001944_vasculature_development	16	0	0	1	1
GO:0001946_lymphangiogenesis	11	0	0	1	1
GO:0001947_heart_looping	63	0	0	1	1
GO:0001952_regulation_of_cell-matrix_adhesion	12	0	0	1	1
GO:0001953_negative_regulation_of_cell-matrix_adhesion	22	0	0	1	1
GO:0001954_positive_regulation_of_cell-matrix_adhesion	27	0	0	1	1
GO:0001958_endochondral_ossification	29	0	0	1	1
GO:0001960_negative_regulation_of_cytokine-mediated_signaling_pathway	13	0	0	1	1
GO:0001961_positive_regulation_of_cytokine-mediated_signaling_pathway	10	0	0	1	1
GO:0001963_synaptic_transmission,_dopaminergic	11	0	0	1	1
GO:0001964_startle_response	13	0	0	1	1
GO:0001967_suckling_behavior	13	0	0	1	1
GO:0001974_blood_vessel_remodeling	32	0	0	1	1
GO:0002003_angiotensin_maturation	12	0	0	1	1
GO:0002024_diet_induced_thermogenesis	12	0	0	1	1
GO:0002026_regulation_of_the_force_of_heart_contraction	17	0	0	1	1
GO:0002027_regulation_of_heart_rate	32	0	0	1	1
GO:0002028_regulation_of_sodium_ion_transport	18	0	0	1	1
GO:0002031_G_protein-coupled_receptor_internalization	13	0	0	1	1
GO:0002040_sprouting_angiogenesis	31	0	0	1	1
GO:0002042_cell_migration_involved_in_sprouting_angiogenesis	21	0	0	1	1
GO:0002052_positive_regulation_of_neuroblast_proliferation	23	0	0	1	1
GO:0002053_positive_regulation_of_mesenchymal_cell_proliferation	23	0	0	1	1
GO:0002062_chondrocyte_differentiation	38	0	0	1	1
GO:0002064_epithelial_cell_development	12	0	0	1	1
GO:0002076_osteoblast_development	19	0	0	1	1
GO:0002082_regulation_of_oxidative_phosphorylation	11	0	0	1	1
GO:0002084_protein_depalmitoylation	9	0	0	1	1
GO:0002087_regulation_of_respiratory_gaseous_exchange_by_nervous_system_process	13	0	0	1	1
GO:0002088_lens_development_in_camera-type_eye	41	0	0	1	1
GO:0002089_lens_morphogenesis_in_camera-type_eye	12	0	0	1	1
GO:0002091_negative_regulation_of_receptor_internalization	13	0	0	1	1
GO:0002098_tRNA_wobble_uridine_modification	15	0	0	1	1
GO:0002181_cytoplasmic_translation	41	0	0	1	1
GO:0002218_activation_of_innate_immune_response	26	0	0	1	1
GO:0002224_toll-like_receptor_signaling_pathway	44	0	0	1	1
GO:0002227_innate_immune_response_in_mucosa	26	0	0	1	1
GO:0002230_positive_regulation_of_defense_response_to_virus_by_host	29	0	0	1	1
GO:0002244_hematopoietic_progenitor_cell_differentiation	66	0	0	1	1
GO:0002250_adaptive_immune_response	173	0	0	1	1
GO:0002281_macrophage_activation_involved_in_immune_response	11	0	0	1	1
GO:0002323_natural_killer_cell_activation_involved_in_immune_response	19	0	0	1	1
GO:0002376_immune_system_process	36	0	0	1	1
GO:0002377_immunoglobulin_production	14	0	0	1	1
GO:0002407_dendritic_cell_chemotaxis	17	0	0	1	1
GO:0002430_complement_receptor_mediated_signaling_pathway	12	0	0	1	1
GO:0002437_inflammatory_response_to_antigenic_stimulus	23	0	0	1	1
GO:0002474_antigen_processing_and_presentation_of_peptide_antigen_via_MHC_class_I	27	0	0	1	1
GO:0002479_antigen_processing_and_presentation_of_exogenous_peptide_antigen_via_MHC_class_I,_TAP-dependent	75	0	0	1	1
GO:0002526_acute_inflammatory_response	13	0	0	1	1
GO:0002576_platelet_degranulation	124	0.81	2.54	0.329354	1	EGF
GO:0002675_positive_regulation_of_acute_inflammatory_response	13	0	0	1	1
GO:0002687_positive_regulation_of_leukocyte_migration	11	0	0	1	1
GO:0002755_MyD88-dependent_toll-like_receptor_signaling_pathway	32	0	0	1	1
GO:0002827_positive_regulation_of_T-helper_1_type_immune_response	9	0	0	1	1
GO:0002862_negative_regulation_of_inflammatory_response_to_antigenic_stimulus	13	0	0	1	1
GO:0002931_response_to_ischemia	55	0	0	1	1
GO:0003007_heart_morphogenesis	39	0	0	1	1
GO:0003009_skeletal_muscle_contraction	26	0	0	1	1
GO:0003016_respiratory_system_process	14	0	0	1	1
GO:0003073_regulation_of_systemic_arterial_blood_pressure	12	0	0	1	1
GO:0003085_negative_regulation_of_systemic_arterial_blood_pressure	13	0	0	1	1
GO:0003091_renal_water_homeostasis	34	0	0	1	1
GO:0003139_secondary_heart_field_specification	11	0	0	1	1
GO:0003148_outflow_tract_septum_morphogenesis	27	0	0	1	1
GO:0003151_outflow_tract_morphogenesis	49	0	0	1	1
GO:0003181_atrioventricular_valve_morphogenesis	12	0	0	1	1
GO:0003198_epithelial_to_mesenchymal_transition_involved_in_endocardial_cushion_formation	12	0	0	1	1
GO:0003203_endocardial_cushion_morphogenesis	18	0	0	1	1
GO:0003215_cardiac_right_ventricle_morphogenesis	13	0	0	1	1
GO:0003222_ventricular_trabecula_myocardium_morphogenesis	16	0	0	1	1
GO:0003279_cardiac_septum_development	11	0	0	1	1
GO:0003281_ventricular_septum_development	33	0	0	1	1
GO:0003323_type_B_pancreatic_cell_development	12	0	0	1	1
GO:0003333_amino_acid_transmembrane_transport	32	0	0	1	1
GO:0003341_cilium_movement	40	0	0	1	1
GO:0003351_epithelial_cilium_movement_involved_in_extracellular_fluid_movement	17	0	0	1	1
GO:0003376_sphingosine-1-phosphate_receptor_signaling_pathway	10	0	0	1	1
GO:0003382_epithelial_cell_morphogenesis	16	0	0	1	1
GO:0003407_neural_retina_development	14	0	0	1	1
GO:0005513_detection_of_calcium_ion	13	0	0	1	1
GO:0005975_carbohydrate_metabolic_process	124	0	0	1	1
GO:0005977_glycogen_metabolic_process	27	0	0	1	1
GO:0005978_glycogen_biosynthetic_process	19	0	0	1	1
GO:0005979_regulation_of_glycogen_biosynthetic_process	12	0	0	1	1
GO:0005980_glycogen_catabolic_process	16	0	0	1	1
GO:0006002_fructose_6-phosphate_metabolic_process	12	0	0	1	1
GO:0006004_fucose_metabolic_process	7	0	0	1	1
GO:0006006_glucose_metabolic_process	55	0	0	1	1
GO:0006024_glycosaminoglycan_biosynthetic_process	38	0	0	1	1
GO:0006027_glycosaminoglycan_catabolic_process	25	0	0	1	1
GO:0006044_N-acetylglucosamine_metabolic_process	14	0	0	1	1
GO:0006048_UDP-N-acetylglucosamine_biosynthetic_process	11	0	0	1	1
GO:0006068_ethanol_catabolic_process	13	0	0	1	1
GO:0006069_ethanol_oxidation	12	0	0	1	1
GO:0006071_glycerol_metabolic_process	13	0	0	1	1
GO:0006082_organic_acid_metabolic_process	20	0	0	1	1
GO:0006090_pyruvate_metabolic_process	23	0	0	1	1
GO:0006091_generation_of_precursor_metabolites_and_energy	48	0	0	1	1
GO:0006096_glycolytic_process	33	0	0	1	1
GO:0006098_pentose-phosphate_shunt	12	0	0	1	1
GO:0006099_tricarboxylic_acid_cycle	34	0	0	1	1
GO:0006103_2-oxoglutarate_metabolic_process	16	0	0	1	1
GO:0006108_malate_metabolic_process	8	0	0	1	1
GO:0006110_regulation_of_glycolytic_process	42	0	0	1	1
GO:0006111_regulation_of_gluconeogenesis	14	0	0	1	1
GO:0006112_energy_reserve_metabolic_process	15	0	0	1	1
GO:0006119_oxidative_phosphorylation	17	0	0	1	1
GO:0006120_mitochondrial_electron_transport,_NADH_to_ubiquinone	49	0	0	1	1
GO:0006122_mitochondrial_electron_transport,_ubiquinol_to_cytochrome_c	14	0	0	1	1
GO:0006123_mitochondrial_electron_transport,_cytochrome_c_to_oxygen	20	0	0	1	1
GO:0006139_nucleobase-containing_compound_metabolic_process	31	0	0	1	1
GO:0006163_purine_nucleotide_metabolic_process	12	0	0	1	1
GO:0006164_purine_nucleotide_biosynthetic_process	11	0	0	1	1
GO:0006165_nucleoside_diphosphate_phosphorylation	16	0	0	1	1
GO:0006171_cAMP_biosynthetic_process	10	0	0	1	1
GO:0006182_cGMP_biosynthetic_process	11	0	0	1	1
GO:0006183_GTP_biosynthetic_process	10	0	0	1	1
GO:0006195_purine_nucleotide_catabolic_process	13	0	0	1	1
GO:0006241_CTP_biosynthetic_process	10	0	0	1	1
GO:0006259_DNA_metabolic_process	26	0	0	1	1
GO:0006264_mitochondrial_DNA_replication	9	0	0	1	1
GO:0006265_DNA_topological_change	9	0	0	1	1
GO:0006275_regulation_of_DNA_replication	22	0	0	1	1
GO:0006283_transcription-coupled_nucleotide-excision_repair	73	1.37	4.35	0.209408	1	RPA1
GO:0006301_postreplication_repair	10	0	0	1	1
GO:0006302_double-strand_break_repair	61	0	0	1	1
GO:0006303_double-strand_break_repair_via_nonhomologous_end_joining	66	0	0	1	1
GO:0006306_DNA_methylation	23	0	0	1	1
GO:0006307_DNA_dealkylation_involved_in_DNA_repair	10	0	0	1	1
GO:0006309_apoptotic_DNA_fragmentation	16	0	0	1	1
GO:0006325_chromatin_organization	153	0.65	2.06	0.389341	1	PHF19
GO:0006336_DNA_replication-independent_nucleosome_assembly	26	0	0	1	1
GO:0006337_nucleosome_disassembly	18	0	0	1	1
GO:0006338_chromatin_remodeling	99	0	0	1	1
GO:0006342_chromatin_silencing	47	0	0	1	1
GO:0006349_regulation_of_gene_expression_by_genetic_imprinting	16	0	0	1	1
GO:0006351_transcription,_DNA-templated	88	0	0	1	1
GO:0006352_DNA-templated_transcription,_initiation	31	0	0	1	1
GO:0006355_regulation_of_transcription,_DNA-templated	757	0.53	1.68	0.2255	1	NFATC2;NFKB2;PHF19;CDCA7L
GO:0006357_regulation_of_transcription_by_RNA_polymerase_II	1291	0.15	0.47	0.923687	1	ATF3;RFX5
GO:0006361_transcription_initiation_from_RNA_polymerase_I_promoter	33	0	0	1	1
GO:0006362_transcription_elongation_from_RNA_polymerase_I_promoter	29	0	0	1	1
GO:0006363_termination_of_RNA_polymerase_I_transcription	30	0	0	1	1
GO:0006364_rRNA_processing	143	0	0	1	1
GO:0006366_transcription_by_RNA_polymerase_II	188	0.53	1.67	0.454713	1	NFKB1
GO:0006367_transcription_initiation_from_RNA_polymerase_II_promoter	160	0	0	1	1
GO:0006368_transcription_elongation_from_RNA_polymerase_II_promoter	74	0	0	1	1
GO:0006369_termination_of_RNA_polymerase_II_transcription	34	0	0	1	1
GO:0006370_7-methylguanosine_mRNA_capping	33	0	0	1	1
GO:0006376_mRNA_splice_site_selection	21	0	0	1	1
GO:0006378_mRNA_polyadenylation	30	0	0	1	1
GO:0006382_adenosine_to_inosine_editing	7	0	0	1	1
GO:0006383_transcription_by_RNA_polymerase_III	23	0	0	1	1
GO:0006388_tRNA_splicing,_via_endonucleolytic_cleavage_and_ligation	15	0	0	1	1
GO:0006390_mitochondrial_transcription	10	0	0	1	1
GO:0006396_RNA_processing	491	0	0	1	1
GO:0006397_mRNA_processing	159	0.63	1.98	0.401074	1	LGALS3
GO:0006400_tRNA_modification	32	0	0	1	1
GO:0006401_RNA_catabolic_process	22	0	0	1	1
GO:0006405_RNA_export_from_nucleus	56	0	0	1	1
GO:0006406_mRNA_export_from_nucleus	101	0	0	1	1
GO:0006409_tRNA_export_from_nucleus	34	0	0	1	1
GO:0006412_translation	176	0	0	1	1
GO:0006413_translational_initiation	130	0	0	1	1
GO:0006414_translational_elongation	20	0	0	1	1
GO:0006417_regulation_of_translation	61	0	0	1	1
GO:0006418_tRNA_aminoacylation_for_protein_translation	38	0	0	1	1
GO:0006464_cellular_protein_modification_process	81	0	0	1	1
GO:0006465_signal_peptide_processing	11	0	0	1	1
GO:0006469_negative_regulation_of_protein_kinase_activity	76	1.32	4.18	0.217016	1	HSPB1
GO:0006470_protein_dephosphorylation	148	0	0	1	1
GO:0006471_protein_ADP-ribosylation	23	0	0	1	1
GO:0006473_protein_acetylation	15	0	0	1	1
GO:0006474_N-terminal_protein_amino_acid_acetylation	9	0	0	1	1
GO:0006476_protein_deacetylation	14	0	0	1	1
GO:0006479_protein_methylation	28	0	0	1	1
GO:0006486_protein_glycosylation	89	0	0	1	1
GO:0006487_protein_N-linked_glycosylation	45	0	0	1	1
GO:0006488_dolichol-linked_oligosaccharide_biosynthetic_process	15	0	0	1	1
GO:0006491_N-glycan_processing	17	0	0	1	1
GO:0006493_protein_O-linked_glycosylation	36	0	0	1	1
GO:0006497_protein_lipidation	11	0	0	1	1
GO:0006506_GPI_anchor_biosynthetic_process	25	0	0	1	1
GO:0006508_proteolysis	428	0	0	1	1
GO:0006509_membrane_protein_ectodomain_proteolysis	20	0	0	1	1
GO:0006511_ubiquitin-dependent_protein_catabolic_process	293	0.34	1.06	0.612104	1	DTL
GO:0006515_protein_quality_control_for_misfolded_or_incompletely_synthesized_proteins	13	0	0	1	1
GO:0006516_glycoprotein_catabolic_process	12	0	0	1	1
GO:0006517_protein_deglycosylation	8	0	0	1	1
GO:0006518_peptide_metabolic_process	13	0	0	1	1
GO:0006520_cellular_amino_acid_metabolic_process	19	0	0	1	1
GO:0006521_regulation_of_cellular_amino_acid_metabolic_process	51	0	0	1	1
GO:0006536_glutamate_metabolic_process	14	0	0	1	1
GO:0006541_glutamine_metabolic_process	18	0	0	1	1
GO:0006548_histidine_catabolic_process	8	0	0	1	1
GO:0006552_leucine_catabolic_process	6	0	0	1	1
GO:0006554_lysine_catabolic_process	12	0	0	1	1
GO:0006556_S-adenosylmethionine_biosynthetic_process	4	0	0	1	1
GO:0006559_L-phenylalanine_catabolic_process	11	0	0	1	1
GO:0006564_L-serine_biosynthetic_process	7	0	0	1	1
GO:0006590_thyroid_hormone_generation	17	0	0	1	1
GO:0006605_protein_targeting	43	0	0	1	1
GO:0006606_protein_import_into_nucleus	78	1.28	4.07	0.222048	1	NFKBIA
GO:0006607_NLS-bearing_protein_import_into_nucleus	20	0	0	1	1
GO:0006611_protein_export_from_nucleus	28	0	0	1	1
GO:0006612_protein_targeting_to_membrane	53	0	0	1	1
GO:0006614_SRP-dependent_cotranslational_protein_targeting_to_membrane	89	0	0	1	1
GO:0006617_SRP-dependent_cotranslational_protein_targeting_to_membrane,_signal_sequence_recognition	10	0	0	1	1
GO:0006622_protein_targeting_to_lysosome	18	0	0	1	1
GO:0006623_protein_targeting_to_vacuole	16	0	0	1	1
GO:0006625_protein_targeting_to_peroxisome	65	0	0	1	1
GO:0006626_protein_targeting_to_mitochondrion	30	0	0	1	1
GO:0006629_lipid_metabolic_process	141	0	0	1	1
GO:0006631_fatty_acid_metabolic_process	65	0	0	1	1
GO:0006633_fatty_acid_biosynthetic_process	43	0	0	1	1
GO:0006635_fatty_acid_beta-oxidation	44	0	0	1	1
GO:0006636_unsaturated_fatty_acid_biosynthetic_process	14	0	0	1	1
GO:0006637_acyl-CoA_metabolic_process	31	0	0	1	1
GO:0006641_triglyceride_metabolic_process	32	0	0	1	1
GO:0006646_phosphatidylethanolamine_biosynthetic_process	15	0	0	1	1
GO:0006654_phosphatidic_acid_biosynthetic_process	48	0	0	1	1
GO:0006656_phosphatidylcholine_biosynthetic_process	34	0	0	1	1
GO:0006661_phosphatidylinositol_biosynthetic_process	77	0	0	1	1
GO:0006665_sphingolipid_metabolic_process	25	0	0	1	1
GO:0006672_ceramide_metabolic_process	21	0	0	1	1
GO:0006687_glycosphingolipid_metabolic_process	40	0	0	1	1
GO:0006690_icosanoid_metabolic_process	9	0	0	1	1
GO:0006691_leukotriene_metabolic_process	17	0	0	1	1
GO:0006693_prostaglandin_metabolic_process	20	0	0	1	1
GO:0006694_steroid_biosynthetic_process	26	0	0	1	1
GO:0006695_cholesterol_biosynthetic_process	40	0	0	1	1
GO:0006699_bile_acid_biosynthetic_process	27	0	0	1	1
GO:0006700_C21-steroid_hormone_biosynthetic_process	12	0	0	1	1
GO:0006703_estrogen_biosynthetic_process	13	0	0	1	1
GO:0006704_glucocorticoid_biosynthetic_process	10	0	0	1	1
GO:0006707_cholesterol_catabolic_process	11	0	0	1	1
GO:0006729_tetrahydrobiopterin_biosynthetic_process	7	0	0	1	1
GO:0006744_ubiquinone_biosynthetic_process	16	0	0	1	1
GO:0006749_glutathione_metabolic_process	33	0	0	1	1
GO:0006750_glutathione_biosynthetic_process	15	0	0	1	1
GO:0006751_glutathione_catabolic_process	11	0	0	1	1
GO:0006754_ATP_biosynthetic_process	28	0	0	1	1
GO:0006768_biotin_metabolic_process	9	0	0	1	1
GO:0006783_heme_biosynthetic_process	22	0	0	1	1
GO:0006790_sulfur_compound_metabolic_process	15	0	0	1	1
GO:0006796_phosphate-containing_compound_metabolic_process	17	0	0	1	1
GO:0006801_superoxide_metabolic_process	20	0	0	1	1
GO:0006805_xenobiotic_metabolic_process	94	1.06	3.37	0.26117	1	HSP90AB1
GO:0006809_nitric_oxide_biosynthetic_process	13	0	0	1	1
GO:0006810_transport	36	0	0	1	1
GO:0006811_ion_transport	98	0	0	1	1
GO:0006812_cation_transport	29	0	0	1	1
GO:0006813_potassium_ion_transport	68	1.47	4.68	0.196565	1	CDK2
GO:0006814_sodium_ion_transport	77	0	0	1	1
GO:0006816_calcium_ion_transport	76	0	0	1	1
GO:0006820_anion_transport	18	0	0	1	1
GO:0006821_chloride_transport	37	0	0	1	1
GO:0006825_copper_ion_transport	15	0	0	1	1
GO:0006826_iron_ion_transport	19	0	0	1	1
GO:0006828_manganese_ion_transport	11	0	0	1	1
GO:0006833_water_transport	16	0	0	1	1
GO:0006836_neurotransmitter_transport	28	0	0	1	1
GO:0006851_mitochondrial_calcium_ion_transmembrane_transport	23	0	0	1	1
GO:0006853_carnitine_shuttle	11	0	0	1	1
GO:0006865_amino_acid_transport	40	0	0	1	1
GO:0006868_glutamine_transport	8	0	0	1	1
GO:0006869_lipid_transport	60	0	0	1	1
GO:0006874_cellular_calcium_ion_homeostasis	98	0	0	1	1
GO:0006878_cellular_copper_ion_homeostasis	14	0	0	1	1
GO:0006879_cellular_iron_ion_homeostasis	61	0	0	1	1
GO:0006882_cellular_zinc_ion_homeostasis	30	0	0	1	1
GO:0006883_cellular_sodium_ion_homeostasis	18	0	0	1	1
GO:0006884_cell_volume_homeostasis	19	0	0	1	1
GO:0006885_regulation_of_pH	12	0	0	1	1
GO:0006886_intracellular_protein_transport	277	0	0	1	1
GO:0006887_exocytosis	94	1.06	3.37	0.26117	1	TNFAIP2
GO:0006890_retrograde_vesicle-mediated_transport,_Golgi_to_endoplasmic_reticulum	85	1.18	3.73	0.23941	1	KIF4A
GO:0006891_intra-Golgi_vesicle-mediated_transport	32	0	0	1	1
GO:0006892_post-Golgi_vesicle-mediated_transport	19	0	0	1	1
GO:0006893_Golgi_to_plasma_membrane_transport	23	0	0	1	1
GO:0006895_Golgi_to_endosome_transport	15	0	0	1	1
GO:0006897_endocytosis	185	0.54	1.7	0.449392	1	SCARA3
GO:0006900_vesicle_budding_from_membrane	15	0	0	1	1
GO:0006904_vesicle_docking_involved_in_exocytosis	33	0	0	1	1
GO:0006906_vesicle_fusion	37	0	0	1	1
GO:0006909_phagocytosis	60	0	0	1	1
GO:0006910_phagocytosis,_recognition	9	0	0	1	1
GO:0006911_phagocytosis,_engulfment	26	0	0	1	1
GO:0006913_nucleocytoplasmic_transport	20	0	0	1	1
GO:0006914_autophagy	126	0.79	2.5	0.333672	1	RAB39A
GO:0006919_activation_of_cysteine-type_endopeptidase_activity_involved_in_apoptotic_process	84	0	0	1	1
GO:0006937_regulation_of_muscle_contraction	14	0	0	1	1
GO:0006939_smooth_muscle_contraction	16	0	0	1	1
GO:0006940_regulation_of_smooth_muscle_contraction	14	0	0	1	1
GO:0006941_striated_muscle_contraction	14	0	0	1	1
GO:0006952_defense_response	73	1.37	4.35	0.209408	1	CD83
GO:0006953_acute-phase_response	37	0	0	1	1
GO:0006955_immune_response	299	0.67	2.12	0.249259	1	CXCL10;CXCL3
GO:0006956_complement_activation	28	0	0	1	1
GO:0006957_complement_activation,_alternative_pathway	13	0	0	1	1
GO:0006958_complement_activation,_classical_pathway	34	0	0	1	1
GO:0006968_cellular_defense_response	52	0	0	1	1
GO:0006970_response_to_osmotic_stress	19	0	0	1	1
GO:0006978_DNA_damage_response,_signal_transduction_by_p53_class_mediator_resulting_in_transcription_of_p21_class_mediator	14	0	0	1	1
GO:0006979_response_to_oxidative_stress	103	0.97	3.07	0.282314	1	SCARA3
GO:0006983_ER_overload_response	11	0	0	1	1
GO:0006995_cellular_response_to_nitrogen_starvation	12	0	0	1	1
GO:0006997_nucleus_organization	23	0	0	1	1
GO:0006998_nuclear_envelope_organization	18	0	0	1	1
GO:0007005_mitochondrion_organization	90	0	0	1	1
GO:0007007_inner_mitochondrial_membrane_organization	18	0	0	1	1
GO:0007009_plasma_membrane_organization	23	0	0	1	1
GO:0007015_actin_filament_organization	119	0	0	1	1
GO:0007020_microtubule_nucleation	18	0	0	1	1
GO:0007026_negative_regulation_of_microtubule_depolymerization	27	0	0	1	1
GO:0007029_endoplasmic_reticulum_organization	34	0	0	1	1
GO:0007030_Golgi_organization	118	0	0	1	1
GO:0007031_peroxisome_organization	20	0	0	1	1
GO:0007032_endosome_organization	38	0	0	1	1
GO:0007035_vacuolar_acidification	14	0	0	1	1
GO:0007040_lysosome_organization	42	0	0	1	1
GO:0007043_cell-cell_junction_assembly	37	0	0	1	1
GO:0007050_cell_cycle_arrest	129	0	0	1	1
GO:0007051_spindle_organization	16	0	0	1	1
GO:0007059_chromosome_segregation	73	0	0	1	1
GO:0007062_sister_chromatid_cohesion	23	0	0	1	1
GO:0007064_mitotic_sister_chromatid_cohesion	13	0	0	1	1
GO:0007076_mitotic_chromosome_condensation	16	0	0	1	1
GO:0007077_mitotic_nuclear_envelope_disassembly	12	0	0	1	1
GO:0007084_mitotic_nuclear_envelope_reassembly	10	0	0	1	1
GO:0007088_regulation_of_mitotic_nuclear_division	23	0	0	1	1
GO:0007094_mitotic_spindle_assembly_checkpoint	22	0	0	1	1
GO:0007095_mitotic_G2_DNA_damage_checkpoint	21	0	0	1	1
GO:0007096_regulation_of_exit_from_mitosis	12	0	0	1	1
GO:0007097_nuclear_migration	15	0	0	1	1
GO:0007098_centrosome_cycle	40	0	0	1	1
GO:0007130_synaptonemal_complex_assembly	21	0	0	1	1
GO:0007131_reciprocal_meiotic_recombination	30	0	0	1	1
GO:0007140_male_meiotic_nuclear_division	24	0	0	1	1
GO:0007141_male_meiosis_I	24	0	0	1	1
GO:0007154_cell_communication	18	0	0	1	1
GO:0007155_cell_adhesion	483	0.62	1.98	0.20258	1	VCAM1;ICAM1;CCL2
GO:0007156_homophilic_cell_adhesion_via_plasma_membrane_adhesion_molecules	167	0	0	1	1
GO:0007158_neuron_cell-cell_adhesion	17	0	0	1	1
GO:0007162_negative_regulation_of_cell_adhesion	50	0	0	1	1
GO:0007163_establishment_or_maintenance_of_cell_polarity	49	0	0	1	1
GO:0007168_receptor_guanylyl_cyclase_signaling_pathway	10	0	0	1	1
GO:0007169_transmembrane_receptor_protein_tyrosine_kinase_signaling_pathway	122	0	0	1	1
GO:0007175_negative_regulation_of_epidermal_growth_factor-activated_receptor_activity	14	0	0	1	1
GO:0007179_transforming_growth_factor_beta_receptor_signaling_pathway	101	0	0	1	1
GO:0007186_G_protein-coupled_receptor_signaling_pathway	1097	0.46	1.45	0.276344	1	CXCL10;CCL2;CXCL3;F2RL1;CALCA
GO:0007187_G_protein-coupled_receptor_signaling_pathway,_coupled_to_cyclic_nucleotide_second_messenger	63	1.59	5.06	0.183515	1	CCL2
GO:0007188_adenylate_cyclase-modulating_G_protein-coupled_receptor_signaling_pathway	50	0	0	1	1
GO:0007191_adenylate_cyclase-activating_dopamine_receptor_signaling_pathway	11	0	0	1	1
GO:0007193_adenylate_cyclase-inhibiting_G_protein-coupled_receptor_signaling_pathway	60	0	0	1	1
GO:0007194_negative_regulation_of_adenylate_cyclase_activity	20	0	0	1	1
GO:0007200_phospholipase_C-activating_G_protein-coupled_receptor_signaling_pathway	60	0	0	1	1
GO:0007205_protein_kinase_C-activating_G_protein-coupled_receptor_signaling_pathway	28	0	0	1	1
GO:0007212_dopamine_receptor_signaling_pathway	18	0	0	1	1
GO:0007213_G_protein-coupled_acetylcholine_receptor_signaling_pathway	15	0	0	1	1
GO:0007214_gamma-aminobutyric_acid_signaling_pathway	27	0	0	1	1
GO:0007215_glutamate_receptor_signaling_pathway	16	0	0	1	1
GO:0007216_G_protein-coupled_glutamate_receptor_signaling_pathway	15	0	0	1	1
GO:0007218_neuropeptide_signaling_pathway	105	0.95	3.01	0.286931	1	CALCA
GO:0007219_Notch_signaling_pathway	110	0	0	1	1
GO:0007220_Notch_receptor_processing	9	0	0	1	1
GO:0007221_positive_regulation_of_transcription_of_Notch_receptor_target	18	0	0	1	1
GO:0007224_smoothened_signaling_pathway	64	0	0	1	1
GO:0007229_integrin-mediated_signaling_pathway	95	0	0	1	1
GO:0007250_activation_of_NF-kappaB-inducing_kinase_activity	17	0	0	1	1
GO:0007252_I-kappaB_phosphorylation	12	0	0	1	1
GO:0007254_JNK_cascade	48	0	0	1	1
GO:0007256_activation_of_JNKK_activity	11	0	0	1	1
GO:0007257_activation_of_JUN_kinase_activity	40	0	0	1	1
GO:0007260_tyrosine_phosphorylation_of_STAT_protein	9	0	0	1	1
GO:0007263_nitric_oxide_mediated_signal_transduction	19	0	0	1	1
GO:0007264_small_GTPase_mediated_signal_transduction	94	0	0	1	1
GO:0007265_Ras_protein_signal_transduction	73	1.37	4.35	0.209408	1	CDK2
GO:0007266_Rho_protein_signal_transduction	57	0	0	1	1
GO:0007268_chemical_synaptic_transmission	246	0	0	1	1
GO:0007271_synaptic_transmission,_cholinergic	25	0	0	1	1
GO:0007274_neuromuscular_synaptic_transmission	19	0	0	1	1
GO:0007275_multicellular_organism_development	469	0.43	1.34	0.445657	1	CEP55;MAK
GO:0007276_gamete_generation	20	0	0	1	1
GO:0007281_germ_cell_development	35	0	0	1	1
GO:0007286_spermatid_development	84	0	0	1	1
GO:0007288_sperm_axoneme_assembly	16	0	0	1	1
GO:0007292_female_gamete_generation	19	0	0	1	1
GO:0007338_single_fertilization	65	0	0	1	1
GO:0007339_binding_of_sperm_to_zona_pellucida	41	0	0	1	1
GO:0007340_acrosome_reaction	17	0	0	1	1
GO:0007342_fusion_of_sperm_to_egg_plasma_membrane_involved_in_single_fertilization	21	0	0	1	1
GO:0007346_regulation_of_mitotic_cell_cycle	44	0	0	1	1
GO:0007368_determination_of_left/right_symmetry	59	0	0	1	1
GO:0007369_gastrulation	23	0	0	1	1
GO:0007389_pattern_specification_process	30	0	0	1	1
GO:0007398_ectoderm_development	13	0	0	1	1
GO:0007399_nervous_system_development	303	0	0	1	1
GO:0007405_neuroblast_proliferation	16	0	0	1	1
GO:0007409_axonogenesis	78	0	0	1	1
GO:0007411_axon_guidance	223	0	0	1	1
GO:0007413_axonal_fasciculation	20	0	0	1	1
GO:0007416_synapse_assembly	63	0	0	1	1
GO:0007417_central_nervous_system_development	139	0	0	1	1
GO:0007420_brain_development	230	0.43	1.36	0.524083	1	BAG3
GO:0007422_peripheral_nervous_system_development	26	0	0	1	1
GO:0007492_endoderm_development	20	0	0	1	1
GO:0007498_mesoderm_development	30	0	0	1	1
GO:0007507_heart_development	190	0	0	1	1
GO:0007512_adult_heart_development	14	0	0	1	1
GO:0007519_skeletal_muscle_tissue_development	50	0	0	1	1
GO:0007520_myoblast_fusion	22	0	0	1	1
GO:0007528_neuromuscular_junction_development	32	0	0	1	1
GO:0007548_sex_differentiation	20	0	0	1	1
GO:0007565_female_pregnancy	85	1.18	3.73	0.23941	1	NAMPT
GO:0007584_response_to_nutrient	68	0	0	1	1
GO:0007585_respiratory_gaseous_exchange_by_respiratory_system	30	0	0	1	1
GO:0007586_digestion	30	0	0	1	1
GO:0007588_excretion	32	0	0	1	1
GO:0007595_lactation	46	0	0	1	1
GO:0007597_blood_coagulation,_intrinsic_pathway	17	0	0	1	1
GO:0007600_sensory_perception	11	0	0	1	1
GO:0007601_visual_perception	206	0.49	1.52	0.485589	1	COL11A1
GO:0007602_phototransduction	27	0	0	1	1
GO:0007608_sensory_perception_of_smell	99	0	0	1	1
GO:0007611_learning_or_memory	61	0	0	1	1
GO:0007612_learning	61	0	0	1	1
GO:0007613_memory	83	0	0	1	1
GO:0007614_short-term_memory	11	0	0	1	1
GO:0007616_long-term_memory	34	0	0	1	1
GO:0007623_circadian_rhythm	74	1.35	4.29	0.211952	1	NAMPT
GO:0007625_grooming_behavior	14	0	0	1	1
GO:0007626_locomotory_behavior	86	0	0	1	1
GO:0007628_adult_walking_behavior	27	0	0	1	1
GO:0008033_tRNA_processing	19	0	0	1	1
GO:0008037_cell_recognition	9	0	0	1	1
GO:0008045_motor_neuron_axon_guidance	26	0	0	1	1
GO:0008053_mitochondrial_fusion	15	0	0	1	1
GO:0008090_retrograde_axonal_transport	11	0	0	1	1
GO:0008104_protein_localization	77	0	0	1	1
GO:0008150_biological_process	592	0	0	1	1
GO:0008154_actin_polymerization_or_depolymerization	22	0	0	1	1
GO:0008202_steroid_metabolic_process	43	0	0	1	1
GO:0008203_cholesterol_metabolic_process	75	0	0	1	1
GO:0008206_bile_acid_metabolic_process	14	0	0	1	1
GO:0008209_androgen_metabolic_process	16	0	0	1	1
GO:0008210_estrogen_metabolic_process	20	0	0	1	1
GO:0008219_cell_death	36	0	0	1	1
GO:0008272_sulfate_transport	13	0	0	1	1
GO:0008277_regulation_of_G_protein-coupled_receptor_signaling_pathway	43	0	0	1	1
GO:0008286_insulin_receptor_signaling_pathway	84	0	0	1	1
GO:0008299_isoprenoid_biosynthetic_process	9	0	0	1	1
GO:0008306_associative_learning	27	0	0	1	1
GO:0008333_endosome_to_lysosome_transport	46	0	0	1	1
GO:0008334_histone_mRNA_metabolic_process	12	0	0	1	1
GO:0008340_determination_of_adult_lifespan	17	0	0	1	1
GO:0008343_adult_feeding_behavior	12	0	0	1	1
GO:0008344_adult_locomotory_behavior	48	0	0	1	1
GO:0008361_regulation_of_cell_size	21	0	0	1	1
GO:0008380_RNA_splicing	160	0.62	1.96	0.403007	1	LGALS3
GO:0008406_gonad_development	11	0	0	1	1
GO:0008542_visual_learning	47	0	0	1	1
GO:0008543_fibroblast_growth_factor_receptor_signaling_pathway	80	0	0	1	1
GO:0008544_epidermis_development	80	0	0	1	1
GO:0008584_male_gonad_development	95	0	0	1	1
GO:0008585_female_gonad_development	19	0	0	1	1
GO:0008589_regulation_of_smoothened_signaling_pathway	21	0	0	1	1
GO:0008593_regulation_of_Notch_signaling_pathway	17	0	0	1	1
GO:0008608_attachment_of_spindle_microtubules_to_kinetochore	10	0	0	1	1
GO:0008610_lipid_biosynthetic_process	14	0	0	1	1
GO:0008611_ether_lipid_biosynthetic_process	6	0	0	1	1
GO:0008630_intrinsic_apoptotic_signaling_pathway_in_response_to_DNA_damage	43	0	0	1	1
GO:0008637_apoptotic_mitochondrial_changes	17	0	0	1	1
GO:0008643_carbohydrate_transport	23	0	0	1	1
GO:0008645_hexose_transmembrane_transport	13	0	0	1	1
GO:0008652_cellular_amino_acid_biosynthetic_process	25	0	0	1	1
GO:0008654_phospholipid_biosynthetic_process	24	0	0	1	1
GO:0009048_dosage_compensation_by_inactivation_of_X_chromosome	12	0	0	1	1
GO:0009060_aerobic_respiration	32	0	0	1	1
GO:0009062_fatty_acid_catabolic_process	12	0	0	1	1
GO:0009083_branched-chain_amino_acid_catabolic_process	20	0	0	1	1
GO:0009100_glycoprotein_metabolic_process	11	0	0	1	1
GO:0009116_nucleoside_metabolic_process	12	0	0	1	1
GO:0009142_nucleoside_triphosphate_biosynthetic_process	9	0	0	1	1
GO:0009165_nucleotide_biosynthetic_process	11	0	0	1	1
GO:0009168_purine_ribonucleoside_monophosphate_biosynthetic_process	13	0	0	1	1
GO:0009235_cobalamin_metabolic_process	21	0	0	1	1
GO:0009267_cellular_response_to_starvation	73	1.37	4.35	0.209408	1	HSPA8
GO:0009303_rRNA_transcription	13	0	0	1	1
GO:0009306_protein_secretion	54	0	0	1	1
GO:0009311_oligosaccharide_metabolic_process	21	0	0	1	1
GO:0009312_oligosaccharide_biosynthetic_process	13	0	0	1	1
GO:0009313_oligosaccharide_catabolic_process	11	0	0	1	1
GO:0009314_response_to_radiation	23	0	0	1	1
GO:0009395_phospholipid_catabolic_process	12	0	0	1	1
GO:0009416_response_to_light_stimulus	22	0	0	1	1
GO:0009435_NAD_biosynthetic_process	12	0	0	1	1
GO:0009566_fertilization	39	0	0	1	1
GO:0009584_detection_of_visible_light	14	0	0	1	1
GO:0009611_response_to_wounding	60	1.67	5.31	0.175585	1	ZFP36
GO:0009612_response_to_mechanical_stimulus	54	0	0	1	1
GO:0009617_response_to_bacterium	94	1.06	3.37	0.26117	1	CCL2
GO:0009636_response_to_toxic_substance	83	0	0	1	1
GO:0009653_anatomical_structure_morphogenesis	131	0	0	1	1
GO:0009725_response_to_hormone	42	0	0	1	1
GO:0009743_response_to_carbohydrate	13	0	0	1	1
GO:0009749_response_to_glucose	68	0	0	1	1
GO:0009755_hormone-mediated_signaling_pathway	47	0	0	1	1
GO:0009790_embryo_development	17	0	0	1	1
GO:0009791_post-embryonic_development	67	0	0	1	1
GO:0009792_embryo_development_ending_in_birth_or_egg_hatching	21	0	0	1	1
GO:0009880_embryonic_pattern_specification	26	0	0	1	1
GO:0009887_animal_organ_morphogenesis	134	0.75	2.35	0.35067	1	CCL2
GO:0009888_tissue_development	34	0	0	1	1
GO:0009948_anterior/posterior_axis_specification	16	0	0	1	1
GO:0009952_anterior/posterior_pattern_specification	97	0	0	1	1
GO:0009953_dorsal/ventral_pattern_formation	35	0	0	1	1
GO:0009954_proximal/distal_pattern_formation	26	0	0	1	1
GO:0009966_regulation_of_signal_transduction	27	0	0	1	1
GO:0009968_negative_regulation_of_signal_transduction	41	0	0	1	1
GO:0009972_cytidine_deamination	12	0	0	1	1
GO:0010001_glial_cell_differentiation	14	0	0	1	1
GO:0010038_response_to_metal_ion	12	0	0	1	1
GO:0010039_response_to_iron_ion	18	0	0	1	1
GO:0010165_response_to_X-ray	20	0	0	1	1
GO:0010243_response_to_organonitrogen_compound	16	0	0	1	1
GO:0010248_establishment_or_maintenance_of_transmembrane_electrochemical_gradient	14	0	0	1	1
GO:0010259_multicellular_organism_aging	18	0	0	1	1
GO:0010269_response_to_selenium_ion	10	0	0	1	1
GO:0010273_detoxification_of_copper_ion	15	0	0	1	1
GO:0010288_response_to_lead_ion	19	0	0	1	1
GO:0010390_histone_monoubiquitination	12	0	0	1	1
GO:0010447_response_to_acidic_pH	14	0	0	1	1
GO:0010457_centriole-centriole_cohesion	11	0	0	1	1
GO:0010458_exit_from_mitosis	11	0	0	1	1
GO:0010459_negative_regulation_of_heart_rate	12	0	0	1	1
GO:0010460_positive_regulation_of_heart_rate	22	0	0	1	1
GO:0010466_negative_regulation_of_peptidase_activity	14	0	0	1	1
GO:0010467_gene_expression	21	0	0	1	1
GO:0010469_regulation_of_signaling_receptor_activity	15	0	0	1	1
GO:0010498_proteasomal_protein_catabolic_process	34	0	0	1	1
GO:0010499_proteasomal_ubiquitin-independent_protein_catabolic_process	22	0	0	1	1
GO:0010501_RNA_secondary_structure_unwinding	8	0	0	1	1
GO:0010506_regulation_of_autophagy	69	1.45	4.61	0.19915	1	HSPB1
GO:0010508_positive_regulation_of_autophagy	57	0	0	1	1
GO:0010510_regulation_of_acetyl-CoA_biosynthetic_process_from_pyruvate	8	0	0	1	1
GO:0010524_positive_regulation_of_calcium_ion_transport_into_cytosol	12	0	0	1	1
GO:0010529_negative_regulation_of_transposition	19	0	0	1	1
GO:0010564_regulation_of_cell_cycle_process	11	0	0	1	1
GO:0010569_regulation_of_double-strand_break_repair_via_homologous_recombination	19	0	0	1	1
GO:0010575_positive_regulation_of_vascular_endothelial_growth_factor_production	28	0	0	1	1
GO:0010586_miRNA_metabolic_process	16	0	0	1	1
GO:0010592_positive_regulation_of_lamellipodium_assembly	25	0	0	1	1
GO:0010595_positive_regulation_of_endothelial_cell_migration	61	0	0	1	1
GO:0010596_negative_regulation_of_endothelial_cell_migration	24	0	0	1	1
GO:0010608_posttranscriptional_regulation_of_gene_expression	24	0	0	1	1
GO:0010613_positive_regulation_of_cardiac_muscle_hypertrophy	21	0	0	1	1
GO:0010614_negative_regulation_of_cardiac_muscle_hypertrophy	19	0	0	1	1
GO:0010629_negative_regulation_of_gene_expression	260	0.77	2.44	0.203231	1	NFKB1;CD34
GO:0010633_negative_regulation_of_epithelial_cell_migration	16	0	0	1	1
GO:0010634_positive_regulation_of_epithelial_cell_migration	37	0	0	1	1
GO:0010666_positive_regulation_of_cardiac_muscle_cell_apoptotic_process	19	0	0	1	1
GO:0010667_negative_regulation_of_cardiac_muscle_cell_apoptotic_process	37	0	0	1	1
GO:0010700_negative_regulation_of_norepinephrine_secretion	8	0	0	1	1
GO:0010717_regulation_of_epithelial_to_mesenchymal_transition	13	0	0	1	1
GO:0010718_positive_regulation_of_epithelial_to_mesenchymal_transition	45	0	0	1	1
GO:0010719_negative_regulation_of_epithelial_to_mesenchymal_transition	37	0	0	1	1
GO:0010737_protein_kinase_A_signaling	14	0	0	1	1
GO:0010738_regulation_of_protein_kinase_A_signaling	15	0	0	1	1
GO:0010759_positive_regulation_of_macrophage_chemotaxis	19	0	0	1	1
GO:0010761_fibroblast_migration	13	0	0	1	1
GO:0010762_regulation_of_fibroblast_migration	12	0	0	1	1
GO:0010763_positive_regulation_of_fibroblast_migration	14	0	0	1	1
GO:0010765_positive_regulation_of_sodium_ion_transport	16	0	0	1	1
GO:0010801_negative_regulation_of_peptidyl-threonine_phosphorylation	21	0	0	1	1
GO:0010812_negative_regulation_of_cell-substrate_adhesion	18	0	0	1	1
GO:0010820_positive_regulation_of_T_cell_chemotaxis	16	0	0	1	1
GO:0010821_regulation_of_mitochondrion_organization	19	0	0	1	1
GO:0010831_positive_regulation_of_myotube_differentiation	15	0	0	1	1
GO:0010832_negative_regulation_of_myotube_differentiation	16	0	0	1	1
GO:0010839_negative_regulation_of_keratinocyte_proliferation	18	0	0	1	1
GO:0010842_retina_layer_formation	25	0	0	1	1
GO:0010862_positive_regulation_of_pathway-restricted_SMAD_protein_phosphorylation	48	0	0	1	1
GO:0010863_positive_regulation_of_phospholipase_C_activity	13	0	0	1	1
GO:0010867_positive_regulation_of_triglyceride_biosynthetic_process	15	0	0	1	1
GO:0010873_positive_regulation_of_cholesterol_esterification	9	0	0	1	1
GO:0010880_regulation_of_release_of_sequestered_calcium_ion_into_cytosol_by_sarcoplasmic_reticulum	20	0	0	1	1
GO:0010881_regulation_of_cardiac_muscle_contraction_by_regulation_of_the_release_of_sequestered_calcium_ion	24	0	0	1	1
GO:0010887_negative_regulation_of_cholesterol_storage	10	0	0	1	1
GO:0010890_positive_regulation_of_sequestering_of_triglyceride	9	0	0	1	1
GO:0010898_positive_regulation_of_triglyceride_catabolic_process	9	0	0	1	1
GO:0010906_regulation_of_glucose_metabolic_process	26	0	0	1	1
GO:0010917_negative_regulation_of_mitochondrial_membrane_potential	14	0	0	1	1
GO:0010918_positive_regulation_of_mitochondrial_membrane_potential	11	0	0	1	1
GO:0010923_negative_regulation_of_phosphatase_activity	50	0	0	1	1
GO:0010940_positive_regulation_of_necrotic_cell_death	10	0	0	1	1
GO:0010942_positive_regulation_of_cell_death	36	0	0	1	1
GO:0010950_positive_regulation_of_endopeptidase_activity	11	0	0	1	1
GO:0010951_negative_regulation_of_endopeptidase_activity	147	0	0	1	1
GO:0010952_positive_regulation_of_peptidase_activity	13	0	0	1	1
GO:0010954_positive_regulation_of_protein_processing	15	0	0	1	1
GO:0010955_negative_regulation_of_protein_processing	15	0	0	1	1
GO:0010972_negative_regulation_of_G2/M_transition_of_mitotic_cell_cycle	60	0	0	1	1
GO:0010975_regulation_of_neuron_projection_development	31	0	0	1	1
GO:0010976_positive_regulation_of_neuron_projection_development	114	0	0	1	1
GO:0010977_negative_regulation_of_neuron_projection_development	64	0	0	1	1
GO:0010989_negative_regulation_of_low-density_lipoprotein_particle_clearance	14	0	0	1	1
GO:0014002_astrocyte_development	16	0	0	1	1
GO:0014003_oligodendrocyte_development	27	0	0	1	1
GO:0014032_neural_crest_cell_development	21	0	0	1	1
GO:0014047_glutamate_secretion	30	0	0	1	1
GO:0014059_regulation_of_dopamine_secretion	29	0	0	1	1
GO:0014065_phosphatidylinositol_3-kinase_signaling	37	0	0	1	1
GO:0014067_negative_regulation_of_phosphatidylinositol_3-kinase_signaling	17	0	0	1	1
GO:0014068_positive_regulation_of_phosphatidylinositol_3-kinase_signaling	88	1.14	3.6	0.246732	1	F2RL1
GO:0014075_response_to_amine	11	0	0	1	1
GO:0014823_response_to_activity	47	0	0	1	1
GO:0014850_response_to_muscle_activity	21	0	0	1	1
GO:0014898_cardiac_muscle_hypertrophy_in_response_to_stress	14	0	0	1	1
GO:0014912_negative_regulation_of_smooth_muscle_cell_migration	13	0	0	1	1
GO:0015012_heparan_sulfate_proteoglycan_biosynthetic_process	14	0	0	1	1
GO:0015031_protein_transport	320	0.31	0.97	0.644707	1	RAB39A
GO:0015074_DNA_integration	8	0	0	1	1
GO:0015671_oxygen_transport	15	0	0	1	1
GO:0015693_magnesium_ion_transport	13	0	0	1	1
GO:0015695_organic_cation_transport	10	0	0	1	1
GO:0015698_inorganic_anion_transport	23	0	0	1	1
GO:0015711_organic_anion_transport	17	0	0	1	1
GO:0015718_monocarboxylic_acid_transport	16	0	0	1	1
GO:0015721_bile_acid_and_bile_salt_transport	28	0	0	1	1
GO:0015760_glucose-6-phosphate_transport	6	0	0	1	1
GO:0015804_neutral_amino_acid_transport	13	0	0	1	1
GO:0015810_aspartate_transmembrane_transport	9	0	0	1	1
GO:0015813_L-glutamate_transmembrane_transport	15	0	0	1	1
GO:0015816_glycine_transport	9	0	0	1	1
GO:0015867_ATP_transport	28	0	0	1	1
GO:0015871_choline_transport	7	0	0	1	1
GO:0015886_heme_transport	8	0	0	1	1
GO:0015909_long-chain_fatty_acid_transport	16	0	0	1	1
GO:0015914_phospholipid_transport	26	0	0	1	1
GO:0015918_sterol_transport	17	0	0	1	1
GO:0015937_coenzyme_A_biosynthetic_process	10	0	0	1	1
GO:0015939_pantothenate_metabolic_process	7	0	0	1	1
GO:0015949_nucleobase-containing_small_molecule_interconversion	27	0	0	1	1
GO:0015986_ATP_synthesis_coupled_proton_transport	13	0	0	1	1
GO:0016024_CDP-diacylglycerol_biosynthetic_process	13	0	0	1	1
GO:0016042_lipid_catabolic_process	80	0	0	1	1
GO:0016045_detection_of_bacterium	12	0	0	1	1
GO:0016050_vesicle_organization	13	0	0	1	1
GO:0016055_Wnt_signaling_pathway	191	0.52	1.64	0.459983	1	CCNE1
GO:0016056_rhodopsin_mediated_signaling_pathway	11	0	0	1	1
GO:0016064_immunoglobulin_mediated_immune_response	13	0	0	1	1
GO:0016070_RNA_metabolic_process	46	0	0	1	1
GO:0016075_rRNA_catabolic_process	16	0	0	1	1
GO:0016079_synaptic_vesicle_exocytosis	24	0	0	1	1
GO:0016081_synaptic_vesicle_docking	11	0	0	1	1
GO:0016082_synaptic_vesicle_priming	16	0	0	1	1
GO:0016125_sterol_metabolic_process	23	0	0	1	1
GO:0016126_sterol_biosynthetic_process	17	0	0	1	1
GO:0016180_snRNA_processing	13	0	0	1	1
GO:0016188_synaptic_vesicle_maturation	11	0	0	1	1
GO:0016197_endosomal_transport	90	0	0	1	1
GO:0016226_iron-sulfur_cluster_assembly	20	0	0	1	1
GO:0016233_telomere_capping	28	0	0	1	1
GO:0016239_positive_regulation_of_macroautophagy	33	0	0	1	1
GO:0016241_regulation_of_macroautophagy	71	0	0	1	1
GO:0016242_negative_regulation_of_macroautophagy	15	0	0	1	1
GO:0016254_preassembly_of_GPI_anchor_in_ER_membrane	17	0	0	1	1
GO:0016255_attachment_of_GPI_anchor_to_protein	6	0	0	1	1
GO:0016264_gap_junction_assembly	8	0	0	1	1
GO:0016266_O-glycan_processing	59	0	0	1	1
GO:0016310_phosphorylation	98	0	0	1	1
GO:0016311_dephosphorylation	90	0	0	1	1
GO:0016322_neuron_remodeling	12	0	0	1	1
GO:0016331_morphogenesis_of_embryonic_epithelium	11	0	0	1	1
GO:0016338_calcium-independent_cell-cell_adhesion_via_plasma_membrane_cell-adhesion_molecules	21	0	0	1	1
GO:0016339_calcium-dependent_cell-cell_adhesion_via_plasma_membrane_cell_adhesion_molecules	41	0	0	1	1
GO:0016358_dendrite_development	42	0	0	1	1
GO:0016446_somatic_hypermutation_of_immunoglobulin_genes	13	0	0	1	1
GO:0016485_protein_processing	56	0	0	1	1
GO:0016486_peptide_hormone_processing	18	0	0	1	1
GO:0016525_negative_regulation_of_angiogenesis	128	0.78	2.46	0.337962	1	CXCL10
GO:0016540_protein_autoprocessing	21	0	0	1	1
GO:0016554_cytidine_to_uridine_editing	12	0	0	1	1
GO:0016558_protein_import_into_peroxisome_matrix	11	0	0	1	1
GO:0016559_peroxisome_fission	9	0	0	1	1
GO:0016567_protein_ubiquitination	490	0.2	0.63	0.796006	1	BIRC3
GO:0016571_histone_methylation	18	0	0	1	1
GO:0016573_histone_acetylation	46	0	0	1	1
GO:0016575_histone_deacetylation	38	0	0	1	1
GO:0016578_histone_deubiquitination	13	0	0	1	1
GO:0016584_nucleosome_positioning	14	0	0	1	1
GO:0016601_Rac_protein_signal_transduction	23	0	0	1	1
GO:0016925_protein_sumoylation	63	0	0	1	1
GO:0016926_protein_desumoylation	7	0	0	1	1
GO:0016973_poly(A)+_mRNA_export_from_nucleus	20	0	0	1	1
GO:0017015_regulation_of_transforming_growth_factor_beta_receptor_signaling_pathway	22	0	0	1	1
GO:0017121_plasma_membrane_phospholipid_scrambling	8	0	0	1	1
GO:0017144_drug_metabolic_process	26	0	0	1	1
GO:0017148_negative_regulation_of_translation	79	0	0	1	1
GO:0017156_calcium-ion_regulated_exocytosis	29	0	0	1	1
GO:0017157_regulation_of_exocytosis	31	0	0	1	1
GO:0017158_regulation_of_calcium_ion-dependent_exocytosis	18	0	0	1	1
GO:0017183_peptidyl-diphthamide_biosynthetic_process_from_peptidyl-histidine	7	0	0	1	1
GO:0017185_peptidyl-lysine_hydroxylation	7	0	0	1	1
GO:0018022_peptidyl-lysine_methylation	12	0	0	1	1
GO:0018023_peptidyl-lysine_trimethylation	11	0	0	1	1
GO:0018026_peptidyl-lysine_monomethylation	10	0	0	1	1
GO:0018095_protein_polyglutamylation	13	0	0	1	1
GO:0018105_peptidyl-serine_phosphorylation	162	0.62	1.94	0.406856	1	CDK2
GO:0018107_peptidyl-threonine_phosphorylation	64	0	0	1	1
GO:0018146_keratan_sulfate_biosynthetic_process	28	0	0	1	1
GO:0018149_peptide_cross-linking	27	0	0	1	1
GO:0018230_peptidyl-L-cysteine_S-palmitoylation	23	0	0	1	1
GO:0018242_protein_O-linked_glycosylation_via_serine	10	0	0	1	1
GO:0018279_protein_N-linked_glycosylation_via_asparagine	30	0	0	1	1
GO:0018298_protein-chromophore_linkage	14	0	0	1	1
GO:0018344_protein_geranylgeranylation	6	0	0	1	1
GO:0018345_protein_palmitoylation	26	0	0	1	1
GO:0018401_peptidyl-proline_hydroxylation_to_4-hydroxy-L-proline	11	0	0	1	1
GO:0019058_viral_life_cycle	30	0	0	1	1
GO:0019068_virion_assembly	12	0	0	1	1
GO:0019083_viral_transcription	109	0	0	1	1
GO:0019216_regulation_of_lipid_metabolic_process	92	1.09	3.44	0.256388	1	GLIPR1
GO:0019222_regulation_of_metabolic_process	20	0	0	1	1
GO:0019226_transmission_of_nerve_impulse	19	0	0	1	1
GO:0019228_neuronal_action_potential	29	0	0	1	1
GO:0019229_regulation_of_vasoconstriction	16	0	0	1	1
GO:0019367_fatty_acid_elongation,_saturated_fatty_acid	7	0	0	1	1
GO:0019370_leukotriene_biosynthetic_process	11	0	0	1	1
GO:0019371_cyclooxygenase_pathway	11	0	0	1	1
GO:0019372_lipoxygenase_pathway	16	0	0	1	1
GO:0019373_epoxygenase_P450_pathway	20	0	0	1	1
GO:0019395_fatty_acid_oxidation	15	0	0	1	1
GO:0019430_removal_of_superoxide_radicals	13	0	0	1	1
GO:0019432_triglyceride_biosynthetic_process	18	0	0	1	1
GO:0019433_triglyceride_catabolic_process	27	0	0	1	1
GO:0019441_tryptophan_catabolic_process_to_kynurenine	5	0	0	1	1
GO:0019509_L-methionine_salvage_from_methylthioadenosine	5	0	0	1	1
GO:0019532_oxalate_transport	10	0	0	1	1
GO:0019674_NAD_metabolic_process	16	0	0	1	1
GO:0019722_calcium-mediated_signaling	84	1.19	3.77	0.236953	1	SELE
GO:0019730_antimicrobial_humoral_response	55	0	0	1	1
GO:0019731_antibacterial_humoral_response	44	0	0	1	1
GO:0019827_stem_cell_population_maintenance	51	0	0	1	1
GO:0019835_cytolysis	18	0	0	1	1
GO:0019852_L-ascorbic_acid_metabolic_process	9	0	0	1	1
GO:0019885_antigen_processing_and_presentation_of_endogenous_peptide_antigen_via_MHC_class_I	9	0	0	1	1
GO:0019915_lipid_storage	24	0	0	1	1
GO:0019933_cAMP-mediated_signaling	29	0	0	1	1
GO:0019934_cGMP-mediated_signaling	20	0	0	1	1
GO:0021522_spinal_cord_motor_neuron_differentiation	19	0	0	1	1
GO:0021527_spinal_cord_association_neuron_differentiation	13	0	0	1	1
GO:0021537_telencephalon_development	18	0	0	1	1
GO:0021542_dentate_gyrus_development	16	0	0	1	1
GO:0021549_cerebellum_development	48	0	0	1	1
GO:0021591_ventricular_system_development	19	0	0	1	1
GO:0021670_lateral_ventricle_development	12	0	0	1	1
GO:0021675_nerve_development	15	0	0	1	1
GO:0021702_cerebellar_Purkinje_cell_differentiation	12	0	0	1	1
GO:0021756_striatum_development	12	0	0	1	1
GO:0021766_hippocampus_development	64	0	0	1	1
GO:0021772_olfactory_bulb_development	18	0	0	1	1
GO:0021794_thalamus_development	12	0	0	1	1
GO:0021819_layer_formation_in_cerebral_cortex	11	0	0	1	1
GO:0021846_cell_proliferation_in_forebrain	12	0	0	1	1
GO:0021854_hypothalamus_development	12	0	0	1	1
GO:0021895_cerebral_cortex_neuron_differentiation	13	0	0	1	1
GO:0021915_neural_tube_development	29	0	0	1	1
GO:0021954_central_nervous_system_neuron_development	14	0	0	1	1
GO:0021983_pituitary_gland_development	27	0	0	1	1
GO:0021987_cerebral_cortex_development	70	0	0	1	1
GO:0022008_neurogenesis	45	0	0	1	1
GO:0022010_central_nervous_system_myelination	14	0	0	1	1
GO:0022011_myelination_in_peripheral_nervous_system	18	0	0	1	1
GO:0022038_corpus_callosum_development	14	0	0	1	1
GO:0022400_regulation_of_rhodopsin_mediated_signaling_pathway	26	0	0	1	1
GO:0022407_regulation_of_cell-cell_adhesion	11	0	0	1	1
GO:0022408_negative_regulation_of_cell-cell_adhesion	15	0	0	1	1
GO:0022409_positive_regulation_of_cell-cell_adhesion	18	0	0	1	1
GO:0022604_regulation_of_cell_morphogenesis	24	0	0	1	1
GO:0022617_extracellular_matrix_disassembly	64	0	0	1	1
GO:0022900_electron_transport_chain	68	0	0	1	1
GO:0022904_respiratory_electron_transport_chain	17	0	0	1	1
GO:0023014_signal_transduction_by_protein_phosphorylation	19	0	0	1	1
GO:0023019_signal_transduction_involved_in_regulation_of_gene_expression	20	0	0	1	1
GO:0030007_cellular_potassium_ion_homeostasis	14	0	0	1	1
GO:0030030_cell_projection_organization	39	0	0	1	1
GO:0030031_cell_projection_assembly	23	0	0	1	1
GO:0030032_lamellipodium_assembly	33	0	0	1	1
GO:0030033_microvillus_assembly	11	0	0	1	1
GO:0030036_actin_cytoskeleton_organization	168	0	0	1	1
GO:0030041_actin_filament_polymerization	33	0	0	1	1
GO:0030042_actin_filament_depolymerization	11	0	0	1	1
GO:0030048_actin_filament-based_movement	18	0	0	1	1
GO:0030049_muscle_filament_sliding	38	0	0	1	1
GO:0030050_vesicle_transport_along_actin_filament	19	0	0	1	1
GO:0030073_insulin_secretion	33	0	0	1	1
GO:0030099_myeloid_cell_differentiation	18	0	0	1	1
GO:0030100_regulation_of_endocytosis	35	0	0	1	1
GO:0030101_natural_killer_cell_activation	22	0	0	1	1
GO:0030111_regulation_of_Wnt_signaling_pathway	23	0	0	1	1
GO:0030148_sphingolipid_biosynthetic_process	52	0	0	1	1
GO:0030150_protein_import_into_mitochondrial_matrix	19	0	0	1	1
GO:0030154_cell_differentiation	590	0.34	1.06	0.567639	1	TNFAIP2;MAK
GO:0030155_regulation_of_cell_adhesion	49	0	0	1	1
GO:0030162_regulation_of_proteolysis	12	0	0	1	1
GO:0030163_protein_catabolic_process	26	0	0	1	1
GO:0030166_proteoglycan_biosynthetic_process	18	0	0	1	1
GO:0030168_platelet_activation	101	0	0	1	1
GO:0030182_neuron_differentiation	152	0	0	1	1
GO:0030183_B_cell_differentiation	74	1.35	4.29	0.211952	1	VCAM1
GO:0030194_positive_regulation_of_blood_coagulation	14	0	0	1	1
GO:0030206_chondroitin_sulfate_biosynthetic_process	26	0	0	1	1
GO:0030207_chondroitin_sulfate_catabolic_process	14	0	0	1	1
GO:0030208_dermatan_sulfate_biosynthetic_process	12	0	0	1	1
GO:0030212_hyaluronan_metabolic_process	11	0	0	1	1
GO:0030214_hyaluronan_catabolic_process	16	0	0	1	1
GO:0030216_keratinocyte_differentiation	53	0	0	1	1
GO:0030217_T_cell_differentiation	36	0	0	1	1
GO:0030218_erythrocyte_differentiation	48	0	0	1	1
GO:0030220_platelet_formation	19	0	0	1	1
GO:0030224_monocyte_differentiation	17	0	0	1	1
GO:0030225_macrophage_differentiation	22	0	0	1	1
GO:0030238_male_sex_determination	12	0	0	1	1
GO:0030239_myofibril_assembly	13	0	0	1	1
GO:0030259_lipid_glycosylation	12	0	0	1	1
GO:0030261_chromosome_condensation	19	0	0	1	1
GO:0030277_maintenance_of_gastrointestinal_epithelium	15	0	0	1	1
GO:0030278_regulation_of_ossification	12	0	0	1	1
GO:0030282_bone_mineralization	45	0	0	1	1
GO:0030301_cholesterol_transport	19	0	0	1	1
GO:0030307_positive_regulation_of_cell_growth	81	0	0	1	1
GO:0030311_poly-N-acetyllactosamine_biosynthetic_process	12	0	0	1	1
GO:0030316_osteoclast_differentiation	31	0	0	1	1
GO:0030317_flagellated_sperm_motility	67	0	0	1	1
GO:0030318_melanocyte_differentiation	21	0	0	1	1
GO:0030322_stabilization_of_membrane_potential	17	0	0	1	1
GO:0030324_lung_development	83	0	0	1	1
GO:0030325_adrenal_gland_development	21	0	0	1	1
GO:0030326_embryonic_limb_morphogenesis	39	0	0	1	1
GO:0030330_DNA_damage_response,_signal_transduction_by_p53_class_mediator	17	0	0	1	1
GO:0030334_regulation_of_cell_migration	100	0	0	1	1
GO:0030336_negative_regulation_of_cell_migration	149	0	0	1	1
GO:0030388_fructose_1,6-bisphosphate_metabolic_process	9	0	0	1	1
GO:0030422_production_of_siRNA_involved_in_RNA_interference	11	0	0	1	1
GO:0030431_sleep	12	0	0	1	1
GO:0030433_ubiquitin-dependent_ERAD_pathway	70	0	0	1	1
GO:0030449_regulation_of_complement_activation	48	0	0	1	1
GO:0030488_tRNA_methylation	33	0	0	1	1
GO:0030490_maturation_of_SSU-rRNA	16	0	0	1	1
GO:0030500_regulation_of_bone_mineralization	20	0	0	1	1
GO:0030501_positive_regulation_of_bone_mineralization	39	0	0	1	1
GO:0030502_negative_regulation_of_bone_mineralization	17	0	0	1	1
GO:0030509_BMP_signaling_pathway	84	0	0	1	1
GO:0030512_negative_regulation_of_transforming_growth_factor_beta_receptor_signaling_pathway	83	1.2	3.82	0.234489	1	HSPA1A
GO:0030513_positive_regulation_of_BMP_signaling_pathway	35	0	0	1	1
GO:0030514_negative_regulation_of_BMP_signaling_pathway	50	0	0	1	1
GO:0030516_regulation_of_axon_extension	14	0	0	1	1
GO:0030517_negative_regulation_of_axon_extension	17	0	0	1	1
GO:0030518_intracellular_steroid_hormone_receptor_signaling_pathway	11	0	0	1	1
GO:0030520_intracellular_estrogen_receptor_signaling_pathway	21	0	0	1	1
GO:0030521_androgen_receptor_signaling_pathway	19	0	0	1	1
GO:0030522_intracellular_receptor_signaling_pathway	26	0	0	1	1
GO:0030534_adult_behavior	30	0	0	1	1
GO:0030539_male_genitalia_development	19	0	0	1	1
GO:0030574_collagen_catabolic_process	43	0	0	1	1
GO:0030833_regulation_of_actin_filament_polymerization	26	0	0	1	1
GO:0030837_negative_regulation_of_actin_filament_polymerization	20	0	0	1	1
GO:0030857_negative_regulation_of_epithelial_cell_differentiation	11	0	0	1	1
GO:0030865_cortical_cytoskeleton_organization	19	0	0	1	1
GO:0030866_cortical_actin_cytoskeleton_organization	29	0	0	1	1
GO:0030878_thyroid_gland_development	21	0	0	1	1
GO:0030879_mammary_gland_development	22	0	0	1	1
GO:0030889_negative_regulation_of_B_cell_proliferation	17	0	0	1	1
GO:0030901_midbrain_development	29	0	0	1	1
GO:0030902_hindbrain_development	18	0	0	1	1
GO:0030948_negative_regulation_of_vascular_endothelial_growth_factor_receptor_signaling_pathway	14	0	0	1	1
GO:0030949_positive_regulation_of_vascular_endothelial_growth_factor_receptor_signaling_pathway	17	0	0	1	1
GO:0030968_endoplasmic_reticulum_unfolded_protein_response	49	0	0	1	1
GO:0030970_retrograde_protein_transport,_ER_to_cytosol	15	0	0	1	1
GO:0031016_pancreas_development	24	0	0	1	1
GO:0031018_endocrine_pancreas_development	24	0	0	1	1
GO:0031023_microtubule_organizing_center_organization	9	0	0	1	1
GO:0031032_actomyosin_structure_organization	31	0	0	1	1
GO:0031047_gene_silencing_by_RNA	35	0	0	1	1
GO:0031053_primary_miRNA_processing	10	0	0	1	1
GO:0031054_pre-miRNA_processing	14	0	0	1	1
GO:0031065_positive_regulation_of_histone_deacetylation	11	0	0	1	1
GO:0031069_hair_follicle_morphogenesis	28	0	0	1	1
GO:0031076_embryonic_camera-type_eye_development	12	0	0	1	1
GO:0031098_stress-activated_protein_kinase_signaling_cascade	20	0	0	1	1
GO:0031100_animal_organ_regeneration	43	0	0	1	1
GO:0031103_axon_regeneration	16	0	0	1	1
GO:0031110_regulation_of_microtubule_polymerization_or_depolymerization	18	0	0	1	1
GO:0031113_regulation_of_microtubule_polymerization	11	0	0	1	1
GO:0031115_negative_regulation_of_microtubule_polymerization	13	0	0	1	1
GO:0031116_positive_regulation_of_microtubule_polymerization	26	0	0	1	1
GO:0031122_cytoplasmic_microtubule_organization	50	0	0	1	1
GO:0031124_mRNA_3'-end_processing	59	0	0	1	1
GO:0031145_anaphase-promoting_complex-dependent_catabolic_process	83	1.2	3.82	0.234489	1	CDK2
GO:0031146_SCF-dependent_proteasomal_ubiquitin-dependent_protein_catabolic_process	92	0	0	1	1
GO:0031167_rRNA_methylation	17	0	0	1	1
GO:0031175_neuron_projection_development	115	0	0	1	1
GO:0031214_biomineral_tissue_development	27	0	0	1	1
GO:0031284_positive_regulation_of_guanylate_cyclase_activity	10	0	0	1	1
GO:0031290_retinal_ganglion_cell_axon_guidance	18	0	0	1	1
GO:0031295_T_cell_costimulation	53	0	0	1	1
GO:0031297_replication_fork_processing	29	0	0	1	1
GO:0031333_negative_regulation_of_protein-containing_complex_assembly	36	0	0	1	1
GO:0031424_keratinization	179	0	0	1	1
GO:0031529_ruffle_organization	14	0	0	1	1
GO:0031532_actin_cytoskeleton_reorganization	57	0	0	1	1
GO:0031573_intra-S_DNA_damage_checkpoint	15	0	0	1	1
GO:0031581_hemidesmosome_assembly	12	0	0	1	1
GO:0031589_cell-substrate_adhesion	19	0	0	1	1
GO:0031623_receptor_internalization	42	0	0	1	1
GO:0031629_synaptic_vesicle_fusion_to_presynaptic_active_zone_membrane	13	0	0	1	1
GO:0031638_zymogen_activation	21	0	0	1	1
GO:0031639_plasminogen_activation	11	0	0	1	1
GO:0031640_killing_of_cells_of_other_organism	37	0	0	1	1
GO:0031641_regulation_of_myelination	20	0	0	1	1
GO:0031643_positive_regulation_of_myelination	19	0	0	1	1
GO:0031647_regulation_of_protein_stability	81	1.23	3.92	0.229536	1	HSPA8
GO:0031648_protein_destabilization	50	0	0	1	1
GO:0031665_negative_regulation_of_lipopolysaccharide-mediated_signaling_pathway	11	0	0	1	1
GO:0031667_response_to_nutrient_levels	41	0	0	1	1
GO:0031668_cellular_response_to_extracellular_stimulus	19	0	0	1	1
GO:0031929_TOR_signaling	19	0	0	1	1
GO:0031936_negative_regulation_of_chromatin_silencing	13	0	0	1	1
GO:0031953_negative_regulation_of_protein_autophosphorylation	12	0	0	1	1
GO:0031954_positive_regulation_of_protein_autophosphorylation	24	0	0	1	1
GO:0032000_positive_regulation_of_fatty_acid_beta-oxidation	10	0	0	1	1
GO:0032006_regulation_of_TOR_signaling	20	0	0	1	1
GO:0032007_negative_regulation_of_TOR_signaling	31	0	0	1	1
GO:0032008_positive_regulation_of_TOR_signaling	34	0	0	1	1
GO:0032012_regulation_of_ARF_protein_signal_transduction	17	0	0	1	1
GO:0032020_ISG15-protein_conjugation	6	0	0	1	1
GO:0032024_positive_regulation_of_insulin_secretion	42	0	0	1	1
GO:0032026_response_to_magnesium_ion	12	0	0	1	1
GO:0032049_cardiolipin_biosynthetic_process	8	0	0	1	1
GO:0032060_bleb_assembly	10	0	0	1	1
GO:0032091_negative_regulation_of_protein_binding	77	0	0	1	1
GO:0032092_positive_regulation_of_protein_binding	70	1.43	4.54	0.201726	1	HSP90AB1
GO:0032094_response_to_food	21	0	0	1	1
GO:0032099_negative_regulation_of_appetite	10	0	0	1	1
GO:0032147_activation_of_protein_kinase_activity	67	1.49	4.75	0.193971	1	CALCA
GO:0032148_activation_of_protein_kinase_B_activity	34	0	0	1	1
GO:0032200_telomere_organization	27	0	0	1	1
GO:0032204_regulation_of_telomere_maintenance	12	0	0	1	1
GO:0032211_negative_regulation_of_telomere_maintenance_via_telomerase	20	0	0	1	1
GO:0032212_positive_regulation_of_telomere_maintenance_via_telomerase	34	0	0	1	1
GO:0032228_regulation_of_synaptic_transmission,_GABAergic	15	0	0	1	1
GO:0032233_positive_regulation_of_actin_filament_bundle_assembly	13	0	0	1	1
GO:0032259_methylation	59	0	0	1	1
GO:0032330_regulation_of_chondrocyte_differentiation	10	0	0	1	1
GO:0032331_negative_regulation_of_chondrocyte_differentiation	21	0	0	1	1
GO:0032332_positive_regulation_of_chondrocyte_differentiation	19	0	0	1	1
GO:0032355_response_to_estradiol	104	0	0	1	1
GO:0032367_intracellular_cholesterol_transport	11	0	0	1	1
GO:0032402_melanosome_transport	21	0	0	1	1
GO:0032418_lysosome_localization	28	0	0	1	1
GO:0032434_regulation_of_proteasomal_ubiquitin-dependent_protein_catabolic_process	13	0	0	1	1
GO:0032438_melanosome_organization	23	0	0	1	1
GO:0032446_protein_modification_by_small_protein_conjugation	11	0	0	1	1
GO:0032456_endocytic_recycling	40	0	0	1	1
GO:0032465_regulation_of_cytokinesis	42	0	0	1	1
GO:0032469_endoplasmic_reticulum_calcium_ion_homeostasis	17	0	0	1	1
GO:0032479_regulation_of_type_I_interferon_production	13	0	0	1	1
GO:0032486_Rap_protein_signal_transduction	10	0	0	1	1
GO:0032502_developmental_process	28	0	0	1	1
GO:0032509_endosome_transport_via_multivesicular_body_sorting_pathway	13	0	0	1	1
GO:0032511_late_endosome_to_vacuole_transport_via_multivesicular_body_sorting_pathway	11	0	0	1	1
GO:0032515_negative_regulation_of_phosphoprotein_phosphatase_activity	50	0	0	1	1
GO:0032525_somite_rostral/caudal_axis_specification	12	0	0	1	1
GO:0032526_response_to_retinoic_acid	44	0	0	1	1
GO:0032543_mitochondrial_translation	31	0	0	1	1
GO:0032570_response_to_progesterone	42	0	0	1	1
GO:0032635_interleukin-6_production	13	0	0	1	1
GO:0032675_regulation_of_interleukin-6_production	10	0	0	1	1
GO:0032689_negative_regulation_of_interferon-gamma_production	38	0	0	1	1
GO:0032693_negative_regulation_of_interleukin-10_production	23	0	0	1	1
GO:0032695_negative_regulation_of_interleukin-12_production	17	0	0	1	1
GO:0032700_negative_regulation_of_interleukin-17_production	22	0	0	1	1
GO:0032715_negative_regulation_of_interleukin-6_production	66	1.52	4.82	0.19137	1	TNFAIP3
GO:0032717_negative_regulation_of_interleukin-8_production	37	0	0	1	1
GO:0032722_positive_regulation_of_chemokine_production	19	0	0	1	1
GO:0032725_positive_regulation_of_granulocyte_macrophage_colony-stimulating_factor_production	11	0	0	1	1
GO:0032727_positive_regulation_of_interferon-alpha_production	20	0	0	1	1
GO:0032728_positive_regulation_of_interferon-beta_production	30	0	0	1	1
GO:0032729_positive_regulation_of_interferon-gamma_production	65	0	0	1	1
GO:0032735_positive_regulation_of_interleukin-12_production	35	0	0	1	1
GO:0032736_positive_regulation_of_interleukin-13_production	12	0	0	1	1
GO:0032740_positive_regulation_of_interleukin-17_production	18	0	0	1	1
GO:0032753_positive_regulation_of_interleukin-4_production	24	0	0	1	1
GO:0032754_positive_regulation_of_interleukin-5_production	11	0	0	1	1
GO:0032755_positive_regulation_of_interleukin-6_production	88	1.14	3.6	0.246732	1	F2RL1
GO:0032760_positive_regulation_of_tumor_necrosis_factor_production	50	0	0	1	1
GO:0032780_negative_regulation_of_ATPase_activity	12	0	0	1	1
GO:0032784_regulation_of_DNA-templated_transcription,_elongation	9	0	0	1	1
GO:0032786_positive_regulation_of_DNA-templated_transcription,_elongation	16	0	0	1	1
GO:0032793_positive_regulation_of_CREB_transcription_factor_activity	19	0	0	1	1
GO:0032801_receptor_catabolic_process	13	0	0	1	1
GO:0032802_low-density_lipoprotein_particle_receptor_catabolic_process	10	0	0	1	1
GO:0032836_glomerular_basement_membrane_development	9	0	0	1	1
GO:0032868_response_to_insulin	67	1.49	4.75	0.193971	1	ICAM1
GO:0032869_cellular_response_to_insulin_stimulus	100	0	0	1	1
GO:0032870_cellular_response_to_hormone_stimulus	29	0	0	1	1
GO:0032874_positive_regulation_of_stress-activated_MAPK_cascade	18	0	0	1	1
GO:0032880_regulation_of_protein_localization	59	0	0	1	1
GO:0032886_regulation_of_microtubule-based_process	9	0	0	1	1
GO:0032924_activin_receptor_signaling_pathway	19	0	0	1	1
GO:0032926_negative_regulation_of_activin_receptor_signaling_pathway	8	0	0	1	1
GO:0032933_SREBP_signaling_pathway	9	0	0	1	1
GO:0032956_regulation_of_actin_cytoskeleton_organization	74	0	0	1	1
GO:0032958_inositol_phosphate_biosynthetic_process	11	0	0	1	1
GO:0032963_collagen_metabolic_process	14	0	0	1	1
GO:0032966_negative_regulation_of_collagen_biosynthetic_process	17	0	0	1	1
GO:0032967_positive_regulation_of_collagen_biosynthetic_process	26	0	0	1	1
GO:0032968_positive_regulation_of_transcription_elongation_from_RNA_polymerase_II_promoter	13	0	0	1	1
GO:0032981_mitochondrial_respiratory_chain_complex_I_assembly	65	0	0	1	1
GO:0033077_T_cell_differentiation_in_thymus	31	0	0	1	1
GO:0033137_negative_regulation_of_peptidyl-serine_phosphorylation	27	0	0	1	1
GO:0033141_positive_regulation_of_peptidyl-serine_phosphorylation_of_STAT_protein	20	0	0	1	1
GO:0033146_regulation_of_intracellular_estrogen_receptor_signaling_pathway	15	0	0	1	1
GO:0033147_negative_regulation_of_intracellular_estrogen_receptor_signaling_pathway	13	0	0	1	1
GO:0033148_positive_regulation_of_intracellular_estrogen_receptor_signaling_pathway	11	0	0	1	1
GO:0033151_V(D)J_recombination	8	0	0	1	1
GO:0033169_histone_H3-K9_demethylation	14	0	0	1	1
GO:0033189_response_to_vitamin_A	19	0	0	1	1
GO:0033198_response_to_ATP	18	0	0	1	1
GO:0033210_leptin-mediated_signaling_pathway	8	0	0	1	1
GO:0033234_negative_regulation_of_protein_sumoylation	12	0	0	1	1
GO:0033235_positive_regulation_of_protein_sumoylation	12	0	0	1	1
GO:0033327_Leydig_cell_differentiation	11	0	0	1	1
GO:0033344_cholesterol_efflux	23	0	0	1	1
GO:0033365_protein_localization_to_organelle	18	0	0	1	1
GO:0033539_fatty_acid_beta-oxidation_using_acyl-CoA_dehydrogenase	10	0	0	1	1
GO:0033540_fatty_acid_beta-oxidation_using_acyl-CoA_oxidase	15	0	0	1	1
GO:0033572_transferrin_transport	36	0	0	1	1
GO:0033574_response_to_testosterone	31	0	0	1	1
GO:0033617_mitochondrial_cytochrome_c_oxidase_assembly	22	0	0	1	1
GO:0033619_membrane_protein_proteolysis	12	0	0	1	1
GO:0033622_integrin_activation	9	0	0	1	1
GO:0033628_regulation_of_cell_adhesion_mediated_by_integrin	13	0	0	1	1
GO:0033630_positive_regulation_of_cell_adhesion_mediated_by_integrin	15	0	0	1	1
GO:0033673_negative_regulation_of_kinase_activity	13	0	0	1	1
GO:0033674_positive_regulation_of_kinase_activity	72	0	0	1	1
GO:0033689_negative_regulation_of_osteoblast_proliferation	15	0	0	1	1
GO:0033690_positive_regulation_of_osteoblast_proliferation	12	0	0	1	1
GO:0033700_phospholipid_efflux	12	0	0	1	1
GO:0033962_P-body_assembly	13	0	0	1	1
GO:0033993_response_to_lipid	14	0	0	1	1
GO:0034058_endosomal_vesicle_fusion	8	0	0	1	1
GO:0034063_stress_granule_assembly	20	0	0	1	1
GO:0034067_protein_localization_to_Golgi_apparatus	21	0	0	1	1
GO:0034080_CENP-A_containing_nucleosome_assembly	43	0	0	1	1
GO:0034115_negative_regulation_of_heterotypic_cell-cell_adhesion	11	0	0	1	1
GO:0034116_positive_regulation_of_heterotypic_cell-cell_adhesion	16	0	0	1	1
GO:0034122_negative_regulation_of_toll-like_receptor_signaling_pathway	17	0	0	1	1
GO:0034138_toll-like_receptor_3_signaling_pathway	11	0	0	1	1
GO:0034162_toll-like_receptor_9_signaling_pathway	16	0	0	1	1
GO:0034199_activation_of_protein_kinase_A_activity	18	0	0	1	1
GO:0034220_ion_transmembrane_transport	209	0	0	1	1
GO:0034244_negative_regulation_of_transcription_elongation_from_RNA_polymerase_II_promoter	13	0	0	1	1
GO:0034260_negative_regulation_of_GTPase_activity	49	0	0	1	1
GO:0034314_Arp2/3_complex-mediated_actin_nucleation	19	0	0	1	1
GO:0034329_cell_junction_assembly	18	0	0	1	1
GO:0034332_adherens_junction_organization	44	0	0	1	1
GO:0034333_adherens_junction_assembly	11	0	0	1	1
GO:0034341_response_to_interferon-gamma	23	0	0	1	1
GO:0034371_chylomicron_remodeling	9	0	0	1	1
GO:0034372_very-low-density_lipoprotein_particle_remodeling	9	0	0	1	1
GO:0034374_low-density_lipoprotein_particle_remodeling	16	0	0	1	1
GO:0034375_high-density_lipoprotein_particle_remodeling	18	0	0	1	1
GO:0034378_chylomicron_assembly	11	0	0	1	1
GO:0034379_very-low-density_lipoprotein_particle_assembly	13	0	0	1	1
GO:0034380_high-density_lipoprotein_particle_assembly	13	0	0	1	1
GO:0034382_chylomicron_remnant_clearance	8	0	0	1	1
GO:0034383_low-density_lipoprotein_particle_clearance	24	0	0	1	1
GO:0034384_high-density_lipoprotein_particle_clearance	10	0	0	1	1
GO:0034389_lipid_droplet_organization	20	0	0	1	1
GO:0034394_protein_localization_to_cell_surface	27	0	0	1	1
GO:0034446_substrate_adhesion-dependent_cell_spreading	56	0	0	1	1
GO:0034453_microtubule_anchoring	15	0	0	1	1
GO:0034454_microtubule_anchoring_at_centrosome	10	0	0	1	1
GO:0034472_snRNA_3'-end_processing	19	0	0	1	1
GO:0034497_protein_localization_to_phagophore_assembly_site	12	0	0	1	1
GO:0034501_protein_localization_to_kinetochore	11	0	0	1	1
GO:0034504_protein_localization_to_nucleus	34	0	0	1	1
GO:0034551_mitochondrial_respiratory_chain_complex_III_assembly	10	0	0	1	1
GO:0034587_piRNA_metabolic_process	15	0	0	1	1
GO:0034613_cellular_protein_localization	60	0	0	1	1
GO:0034614_cellular_response_to_reactive_oxygen_species	36	0	0	1	1
GO:0034622_cellular_protein-containing_complex_assembly	22	0	0	1	1
GO:0034626_fatty_acid_elongation,_polyunsaturated_fatty_acid	7	0	0	1	1
GO:0034629_cellular_protein-containing_complex_localization	10	0	0	1	1
GO:0034638_phosphatidylcholine_catabolic_process	12	0	0	1	1
GO:0034644_cellular_response_to_UV	51	0	0	1	1
GO:0034656_nucleobase-containing_small_molecule_catabolic_process	15	0	0	1	1
GO:0034720_histone_H3-K4_demethylation	8	0	0	1	1
GO:0034765_regulation_of_ion_transmembrane_transport	113	0	0	1	1
GO:0034968_histone_lysine_methylation	13	0	0	1	1
GO:0034976_response_to_endoplasmic_reticulum_stress	75	0	0	1	1
GO:0035019_somatic_stem_cell_population_maintenance	63	0	0	1	1
GO:0035023_regulation_of_Rho_protein_signal_transduction	28	0	0	1	1
GO:0035024_negative_regulation_of_Rho_protein_signal_transduction	22	0	0	1	1
GO:0035036_sperm-egg_recognition	18	0	0	1	1
GO:0035050_embryonic_heart_tube_development	16	0	0	1	1
GO:0035066_positive_regulation_of_histone_acetylation	18	0	0	1	1
GO:0035067_negative_regulation_of_histone_acetylation	10	0	0	1	1
GO:0035082_axoneme_assembly	21	0	0	1	1
GO:0035094_response_to_nicotine	32	0	0	1	1
GO:0035108_limb_morphogenesis	14	0	0	1	1
GO:0035115_embryonic_forelimb_morphogenesis	33	0	0	1	1
GO:0035116_embryonic_hindlimb_morphogenesis	29	0	0	1	1
GO:0035148_tube_formation	11	0	0	1	1
GO:0035162_embryonic_hemopoiesis	18	0	0	1	1
GO:0035176_social_behavior	51	0	0	1	1
GO:0035195_gene_silencing_by_miRNA	573	0	0	1	1
GO:0035196_production_of_miRNAs_involved_in_gene_silencing_by_miRNA	14	0	0	1	1
GO:0035235_ionotropic_glutamate_receptor_signaling_pathway	23	0	0	1	1
GO:0035249_synaptic_transmission,_glutamatergic	28	0	0	1	1
GO:0035264_multicellular_organism_growth	85	0	0	1	1
GO:0035269_protein_O-linked_mannosylation	19	0	0	1	1
GO:0035278_miRNA_mediated_inhibition_of_translation	96	1.04	3.3	0.265921	1	ZFP36
GO:0035307_positive_regulation_of_protein_dephosphorylation	26	0	0	1	1
GO:0035313_wound_healing,_spreading_of_epidermal_cells	11	0	0	1	1
GO:0035329_hippo_signaling	27	0	0	1	1
GO:0035331_negative_regulation_of_hippo_signaling	11	0	0	1	1
GO:0035335_peptidyl-tyrosine_dephosphorylation	99	0	0	1	1
GO:0035338_long-chain_fatty-acyl-CoA_biosynthetic_process	19	0	0	1	1
GO:0035372_protein_localization_to_microtubule	10	0	0	1	1
GO:0035418_protein_localization_to_synapse	12	0	0	1	1
GO:0035435_phosphate_ion_transmembrane_transport	15	0	0	1	1
GO:0035455_response_to_interferon-alpha	10	0	0	1	1
GO:0035456_response_to_interferon-beta	10	0	0	1	1
GO:0035457_cellular_response_to_interferon-alpha	11	0	0	1	1
GO:0035458_cellular_response_to_interferon-beta	22	0	0	1	1
GO:0035459_vesicle_cargo_loading	12	0	0	1	1
GO:0035493_SNARE_complex_assembly	11	0	0	1	1
GO:0035518_histone_H2A_monoubiquitination	12	0	0	1	1
GO:0035563_positive_regulation_of_chromatin_binding	13	0	0	1	1
GO:0035567_non-canonical_Wnt_signaling_pathway	21	0	0	1	1
GO:0035589_G_protein-coupled_purinergic_nucleotide_receptor_signaling_pathway	14	0	0	1	1
GO:0035633_maintenance_of_blood-brain_barrier	31	0	0	1	1
GO:0035640_exploration_behavior	14	0	0	1	1
GO:0035641_locomotory_exploration_behavior	13	0	0	1	1
GO:0035655_interleukin-18-mediated_signaling_pathway	7	0	0	1	1
GO:0035690_cellular_response_to_drug	67	1.49	4.75	0.193971	1	HSP90AB1
GO:0035721_intraciliary_retrograde_transport	10	0	0	1	1
GO:0035722_interleukin-12-mediated_signaling_pathway	47	0	0	1	1
GO:0035723_interleukin-15-mediated_signaling_pathway	13	0	0	1	1
GO:0035725_sodium_ion_transmembrane_transport	99	0	0	1	1
GO:0035729_cellular_response_to_hepatocyte_growth_factor_stimulus	16	0	0	1	1
GO:0035774_positive_regulation_of_insulin_secretion_involved_in_cellular_response_to_glucose_stimulus	34	0	0	1	1
GO:0035815_positive_regulation_of_renal_sodium_excretion	14	0	0	1	1
GO:0035845_photoreceptor_cell_outer_segment_organization	12	0	0	1	1
GO:0035855_megakaryocyte_development	17	0	0	1	1
GO:0035865_cellular_response_to_potassium_ion	11	0	0	1	1
GO:0035902_response_to_immobilization_stress	22	0	0	1	1
GO:0035904_aorta_development	22	0	0	1	1
GO:0035909_aorta_morphogenesis	14	0	0	1	1
GO:0035965_cardiolipin_acyl-chain_remodeling	8	0	0	1	1
GO:0035970_peptidyl-threonine_dephosphorylation	22	0	0	1	1
GO:0035988_chondrocyte_proliferation	10	0	0	1	1
GO:0035999_tetrahydrofolate_interconversion	10	0	0	1	1
GO:0036010_protein_localization_to_endosome	10	0	0	1	1
GO:0036065_fucosylation	11	0	0	1	1
GO:0036092_phosphatidylinositol-3-phosphate_biosynthetic_process	14	0	0	1	1
GO:0036109_alpha-linolenic_acid_metabolic_process	13	0	0	1	1
GO:0036148_phosphatidylglycerol_acyl-chain_remodeling	18	0	0	1	1
GO:0036150_phosphatidylserine_acyl-chain_remodeling	21	0	0	1	1
GO:0036158_outer_dynein_arm_assembly	19	0	0	1	1
GO:0036159_inner_dynein_arm_assembly	15	0	0	1	1
GO:0036258_multivesicular_body_assembly	30	0	0	1	1
GO:0036342_post-anal_tail_morphogenesis	19	0	0	1	1
GO:0036353_histone_H2A-K119_monoubiquitination	8	0	0	1	1
GO:0036376_sodium_ion_export_across_plasma_membrane	14	0	0	1	1
GO:0036444_calcium_import_into_the_mitochondrion	11	0	0	1	1
GO:0036498_IRE1-mediated_unfolded_protein_response	56	0	0	1	1
GO:0036503_ERAD_pathway	16	0	0	1	1
GO:0038003_opioid_receptor_signaling_pathway	10	0	0	1	1
GO:0038063_collagen-activated_tyrosine_kinase_receptor_signaling_pathway	12	0	0	1	1
GO:0038083_peptidyl-tyrosine_autophosphorylation	36	0	0	1	1
GO:0038084_vascular_endothelial_growth_factor_signaling_pathway	15	0	0	1	1
GO:0038110_interleukin-2-mediated_signaling_pathway	11	0	0	1	1
GO:0038111_interleukin-7-mediated_signaling_pathway	30	0	0	1	1
GO:0038180_nerve_growth_factor_signaling_pathway	12	0	0	1	1
GO:0038202_TORC1_signaling	8	0	0	1	1
GO:0039702_viral_budding_via_host_ESCRT_complex	20	0	0	1	1
GO:0040008_regulation_of_growth	62	0	0	1	1
GO:0040014_regulation_of_multicellular_organism_growth	27	0	0	1	1
GO:0040015_negative_regulation_of_multicellular_organism_growth	11	0	0	1	1
GO:0040018_positive_regulation_of_multicellular_organism_growth	33	0	0	1	1
GO:0040019_positive_regulation_of_embryonic_development	11	0	0	1	1
GO:0040029_regulation_of_gene_expression,_epigenetic	14	0	0	1	1
GO:0040037_negative_regulation_of_fibroblast_growth_factor_receptor_signaling_pathway	24	0	0	1	1
GO:0042058_regulation_of_epidermal_growth_factor_receptor_signaling_pathway	11	0	0	1	1
GO:0042060_wound_healing	89	0	0	1	1
GO:0042098_T_cell_proliferation	22	0	0	1	1
GO:0042100_B_cell_proliferation	35	0	0	1	1
GO:0042102_positive_regulation_of_T_cell_proliferation	61	1.64	5.23	0.178237	1	VCAM1
GO:0042104_positive_regulation_of_activated_T_cell_proliferation	26	0	0	1	1
GO:0042110_T_cell_activation	44	0	0	1	1
GO:0042113_B_cell_activation	33	0	0	1	1
GO:0042116_macrophage_activation	13	0	0	1	1
GO:0042130_negative_regulation_of_T_cell_proliferation	40	0	0	1	1
GO:0042136_neurotransmitter_biosynthetic_process	12	0	0	1	1
GO:0042147_retrograde_transport,_endosome_to_Golgi	77	0	0	1	1
GO:0042149_cellular_response_to_glucose_starvation	49	0	0	1	1
GO:0042157_lipoprotein_metabolic_process	20	0	0	1	1
GO:0042167_heme_catabolic_process	7	0	0	1	1
GO:0042176_regulation_of_protein_catabolic_process	16	0	0	1	1
GO:0042177_negative_regulation_of_protein_catabolic_process	35	0	0	1	1
GO:0042246_tissue_regeneration	23	0	0	1	1
GO:0042254_ribosome_biogenesis	27	0	0	1	1
GO:0042273_ribosomal_large_subunit_biogenesis	27	0	0	1	1
GO:0042274_ribosomal_small_subunit_biogenesis	18	0	0	1	1
GO:0042308_negative_regulation_of_protein_import_into_nucleus	13	0	0	1	1
GO:0042310_vasoconstriction	16	0	0	1	1
GO:0042311_vasodilation	20	0	0	1	1
GO:0042325_regulation_of_phosphorylation	14	0	0	1	1
GO:0042340_keratan_sulfate_catabolic_process	12	0	0	1	1
GO:0042359_vitamin_D_metabolic_process	12	0	0	1	1
GO:0042391_regulation_of_membrane_potential	99	0	0	1	1
GO:0042403_thyroid_hormone_metabolic_process	8	0	0	1	1
GO:0042407_cristae_formation	32	0	0	1	1
GO:0042417_dopamine_metabolic_process	13	0	0	1	1
GO:0042438_melanin_biosynthetic_process	13	0	0	1	1
GO:0042445_hormone_metabolic_process	14	0	0	1	1
GO:0042446_hormone_biosynthetic_process	12	0	0	1	1
GO:0042448_progesterone_metabolic_process	10	0	0	1	1
GO:0042462_eye_photoreceptor_cell_development	18	0	0	1	1
GO:0042474_middle_ear_morphogenesis	20	0	0	1	1
GO:0042476_odontogenesis	33	0	0	1	1
GO:0042493_response_to_drug	284	0.7	2.23	0.231472	1	NFATC2;ICAM1
GO:0042531_positive_regulation_of_tyrosine_phosphorylation_of_STAT_protein	71	0	0	1	1
GO:0042532_negative_regulation_of_tyrosine_phosphorylation_of_STAT_protein	16	0	0	1	1
GO:0042542_response_to_hydrogen_peroxide	51	0	0	1	1
GO:0042551_neuron_maturation	14	0	0	1	1
GO:0042552_myelination	48	0	0	1	1
GO:0042554_superoxide_anion_generation	16	0	0	1	1
GO:0042572_retinol_metabolic_process	47	0	0	1	1
GO:0042573_retinoic_acid_metabolic_process	25	0	0	1	1
GO:0042574_retinal_metabolic_process	15	0	0	1	1
GO:0042592_homeostatic_process	11	0	0	1	1
GO:0042593_glucose_homeostasis	115	0	0	1	1
GO:0042632_cholesterol_homeostasis	101	0	0	1	1
GO:0042633_hair_cycle	14	0	0	1	1
GO:0042692_muscle_cell_differentiation	13	0	0	1	1
GO:0042711_maternal_behavior	12	0	0	1	1
GO:0042730_fibrinolysis	20	0	0	1	1
GO:0042733_embryonic_digit_morphogenesis	55	0	0	1	1
GO:0042738_exogenous_drug_catabolic_process	24	0	0	1	1
GO:0042742_defense_response_to_bacterium	128	0	0	1	1
GO:0042744_hydrogen_peroxide_catabolic_process	28	0	0	1	1
GO:0042752_regulation_of_circadian_rhythm	65	0	0	1	1
GO:0042754_negative_regulation_of_circadian_rhythm	10	0	0	1	1
GO:0042755_eating_behavior	23	0	0	1	1
GO:0042759_long-chain_fatty_acid_biosynthetic_process	26	0	0	1	1
GO:0042760_very_long-chain_fatty_acid_catabolic_process	6	0	0	1	1
GO:0042761_very_long-chain_fatty_acid_biosynthetic_process	13	0	0	1	1
GO:0042770_signal_transduction_in_response_to_DNA_damage	12	0	0	1	1
GO:0042771_intrinsic_apoptotic_signaling_pathway_in_response_to_DNA_damage_by_p53_class_mediator	29	0	0	1	1
GO:0042776_mitochondrial_ATP_synthesis_coupled_proton_transport	21	0	0	1	1
GO:0042789_mRNA_transcription_by_RNA_polymerase_II	11	0	0	1	1
GO:0042795_snRNA_transcription_by_RNA_polymerase_II	70	0	0	1	1
GO:0042832_defense_response_to_protozoan	26	0	0	1	1
GO:0042908_xenobiotic_transport	19	0	0	1	1
GO:0042953_lipoprotein_transport	14	0	0	1	1
GO:0042982_amyloid_precursor_protein_metabolic_process	11	0	0	1	1
GO:0042985_negative_regulation_of_amyloid_precursor_protein_biosynthetic_process	11	0	0	1	1
GO:0042987_amyloid_precursor_protein_catabolic_process	10	0	0	1	1
GO:0042989_sequestering_of_actin_monomers	10	0	0	1	1
GO:0043001_Golgi_to_plasma_membrane_protein_transport	29	0	0	1	1
GO:0043010_camera-type_eye_development	42	0	0	1	1
GO:0043029_T_cell_homeostasis	28	0	0	1	1
GO:0043031_negative_regulation_of_macrophage_activation	10	0	0	1	1
GO:0043032_positive_regulation_of_macrophage_activation	18	0	0	1	1
GO:0043044_ATP-dependent_chromatin_remodeling	34	0	0	1	1
GO:0043046_DNA_methylation_involved_in_gamete_generation	20	0	0	1	1
GO:0043065_positive_regulation_of_apoptotic_process	355	0.56	1.78	0.315744	1	MELK;DNAJA1
GO:0043068_positive_regulation_of_programmed_cell_death	10	0	0	1	1
GO:0043069_negative_regulation_of_programmed_cell_death	15	0	0	1	1
GO:0043085_positive_regulation_of_catalytic_activity	82	0	0	1	1
GO:0043086_negative_regulation_of_catalytic_activity	52	0	0	1	1
GO:0043087_regulation_of_GTPase_activity	71	0	0	1	1
GO:0043097_pyrimidine_nucleoside_salvage	11	0	0	1	1
GO:0043101_purine-containing_compound_salvage	13	0	0	1	1
GO:0043113_receptor_clustering	26	0	0	1	1
GO:0043114_regulation_of_vascular_permeability	12	0	0	1	1
GO:0043116_negative_regulation_of_vascular_permeability	14	0	0	1	1
GO:0043117_positive_regulation_of_vascular_permeability	11	0	0	1	1
GO:0043149_stress_fiber_assembly	16	0	0	1	1
GO:0043153_entrainment_of_circadian_clock_by_photoperiod	29	0	0	1	1
GO:0043154_negative_regulation_of_cysteine-type_endopeptidase_activity_involved_in_apoptotic_process	74	1.35	4.29	0.211952	1	BIRC3
GO:0043161_proteasome-mediated_ubiquitin-dependent_protein_catabolic_process	181	0	0	1	1
GO:0043162_ubiquitin-dependent_protein_catabolic_process_via_the_multivesicular_body_sorting_pathway	19	0	0	1	1
GO:0043171_peptide_catabolic_process	16	0	0	1	1
GO:0043248_proteasome_assembly	9	0	0	1	1
GO:0043249_erythrocyte_maturation	15	0	0	1	1
GO:0043252_sodium-independent_organic_anion_transport	16	0	0	1	1
GO:0043276_anoikis	11	0	0	1	1
GO:0043277_apoptotic_cell_clearance	21	0	0	1	1
GO:0043278_response_to_morphine	26	0	0	1	1
GO:0043280_positive_regulation_of_cysteine-type_endopeptidase_activity_involved_in_apoptotic_process	55	0	0	1	1
GO:0043303_mast_cell_degranulation	14	0	0	1	1
GO:0043304_regulation_of_mast_cell_degranulation	10	0	0	1	1
GO:0043306_positive_regulation_of_mast_cell_degranulation	11	0	0	1	1
GO:0043393_regulation_of_protein_binding	23	0	0	1	1
GO:0043401_steroid_hormone_mediated_signaling_pathway	23	0	0	1	1
GO:0043403_skeletal_muscle_tissue_regeneration	18	0	0	1	1
GO:0043405_regulation_of_MAP_kinase_activity	10	0	0	1	1
GO:0043407_negative_regulation_of_MAP_kinase_activity	41	0	0	1	1
GO:0043408_regulation_of_MAPK_cascade	23	0	0	1	1
GO:0043409_negative_regulation_of_MAPK_cascade	25	0	0	1	1
GO:0043410_positive_regulation_of_MAPK_cascade	111	0.9	2.84	0.300607	1	EGF
GO:0043433_negative_regulation_of_DNA-binding_transcription_factor_activity	83	0	0	1	1
GO:0043434_response_to_peptide_hormone	48	0	0	1	1
GO:0043473_pigmentation	26	0	0	1	1
GO:0043484_regulation_of_RNA_splicing	42	0	0	1	1
GO:0043486_histone_exchange	10	0	0	1	1
GO:0043507_positive_regulation_of_JUN_kinase_activity	36	0	0	1	1
GO:0043517_positive_regulation_of_DNA_damage_response,_signal_transduction_by_p53_class_mediator	12	0	0	1	1
GO:0043518_negative_regulation_of_DNA_damage_response,_signal_transduction_by_p53_class_mediator	15	0	0	1	1
GO:0043523_regulation_of_neuron_apoptotic_process	17	0	0	1	1
GO:0043525_positive_regulation_of_neuron_apoptotic_process	55	0	0	1	1
GO:0043537_negative_regulation_of_blood_vessel_endothelial_cell_migration	44	0	0	1	1
GO:0043542_endothelial_cell_migration	30	0	0	1	1
GO:0043551_regulation_of_phosphatidylinositol_3-kinase_activity	19	0	0	1	1
GO:0043552_positive_regulation_of_phosphatidylinositol_3-kinase_activity	31	0	0	1	1
GO:0043568_positive_regulation_of_insulin-like_growth_factor_receptor_signaling_pathway	13	0	0	1	1
GO:0043586_tongue_development	11	0	0	1	1
GO:0043588_skin_development	35	0	0	1	1
GO:0043589_skin_morphogenesis	11	0	0	1	1
GO:0043616_keratinocyte_proliferation	11	0	0	1	1
GO:0043627_response_to_estrogen	61	1.64	5.23	0.178237	1	CA2
GO:0043647_inositol_phosphate_metabolic_process	47	0	0	1	1
GO:0043651_linoleic_acid_metabolic_process	21	0	0	1	1
GO:0043652_engulfment_of_apoptotic_cell	15	0	0	1	1
GO:0043653_mitochondrial_fragmentation_involved_in_apoptotic_process	9	0	0	1	1
GO:0043666_regulation_of_phosphoprotein_phosphatase_activity	43	0	0	1	1
GO:0043687_post-translational_protein_modification	344	0.29	0.9	0.671405	1	DTL
GO:0043691_reverse_cholesterol_transport	17	0	0	1	1
GO:0043922_negative_regulation_by_host_of_viral_transcription	12	0	0	1	1
GO:0043923_positive_regulation_by_host_of_viral_transcription	17	0	0	1	1
GO:0043928_exonucleolytic_catabolism_of_deadenylated_mRNA	33	0	0	1	1
GO:0043950_positive_regulation_of_cAMP-mediated_signaling	15	0	0	1	1
GO:0043951_negative_regulation_of_cAMP-mediated_signaling	15	0	0	1	1
GO:0043966_histone_H3_acetylation	41	0	0	1	1
GO:0043967_histone_H4_acetylation	38	0	0	1	1
GO:0043968_histone_H2A_acetylation	16	0	0	1	1
GO:0043981_histone_H4-K5_acetylation	16	0	0	1	1
GO:0043982_histone_H4-K8_acetylation	16	0	0	1	1
GO:0043984_histone_H4-K16_acetylation	15	0	0	1	1
GO:0044030_regulation_of_DNA_methylation	17	0	0	1	1
GO:0044154_histone_H3-K14_acetylation	8	0	0	1	1
GO:0044255_cellular_lipid_metabolic_process	15	0	0	1	1
GO:0044257_cellular_protein_catabolic_process	16	0	0	1	1
GO:0044267_cellular_protein_metabolic_process	225	0.44	1.39	0.516306	1	CALCA
GO:0044319_wound_healing,_spreading_of_cells	15	0	0	1	1
GO:0044458_motile_cilium_assembly	23	0	0	1	1
GO:0044539_long-chain_fatty_acid_import_into_cell	8	0	0	1	1
GO:0044597_daunorubicin_metabolic_process	9	0	0	1	1
GO:0044598_doxorubicin_metabolic_process	9	0	0	1	1
GO:0044782_cilium_organization	20	0	0	1	1
GO:0044806_G-quadruplex_DNA_unwinding	7	0	0	1	1
GO:0045010_actin_nucleation	11	0	0	1	1
GO:0045022_early_endosome_to_late_endosome_transport	22	0	0	1	1
GO:0045039_protein_insertion_into_mitochondrial_inner_membrane	8	0	0	1	1
GO:0045047_protein_targeting_to_ER	12	0	0	1	1
GO:0045055_regulated_exocytosis	20	0	0	1	1
GO:0045056_transcytosis	12	0	0	1	1
GO:0045059_positive_thymic_T_cell_selection	11	0	0	1	1
GO:0045060_negative_thymic_T_cell_selection	11	0	0	1	1
GO:0045070_positive_regulation_of_viral_genome_replication	28	0	0	1	1
GO:0045071_negative_regulation_of_viral_genome_replication	41	0	0	1	1
GO:0045087_innate_immune_response	461	0.65	2.07	0.184668	1	RELB;F2RL1;LGALS3
GO:0045089_positive_regulation_of_innate_immune_response	24	0	0	1	1
[truncated: 907 more rows]

## Sheet: CC_24hrs - ORA_Tt24_vs_NIt24-CC
ORA_Tt24_vs_NIt24-CC_all
geneset	NGenes	pctDE	OR	pvalue	FDR	external_gene_name.DE
GO:0005634_nucleus	5127	0.98	5.92	1.31766e-15	8.30128e-13	DYNLL2;DYNLL1;TNFAIP3;HSPA1A;RELB;HSPH1;NFKBIA;DNAJB1;NFATC2;BAG3;NFKB2;ATF3;HSPA8;HSPA1B;HSP90AA1;MCM4;TCIM;MELK;DNAJA1;CDK2;NFKB1;RFX5;MCM3;ZFP36;TUBB;MCM10;CALCA;HSP90AB1;CHAF1B;KIF18B;BIRC3;MCM5;MCM2;PHF19;CDC6;WDR76;HSPB1;XRCC3;DTL;KIFC1;NFATC1;MAK;CDCA7L;REXO5;TEKT1;MCM6;LGALS3;RPA1;MAFF;CCNE1
GO:0005654_nucleoplasm	3680	1.11	5.78	3.68542e-14	1.16091e-11	HSPA1A;RELB;HSPH1;NFKBIA;DNAJB1;NFATC2;NFKB2;ATF3;HSPA8;HSPA1B;HSP90AA1;MCM4;TCIM;CDK2;NFKB1;GINS2;MCM3;SPC24;MCM10;HSP90AB1;CHAF1B;KIF18B;BIRC3;ZWINT;GINS3;MCM5;MCM2;PHF19;CDC6;XRCC3;DTL;PIMREG;NFATC1;CDCA7L;MCM6;RPA1;KIF4A;MAFF;CCNE1;PLA2G4C;FANCI
GO:0005737_cytoplasm	4690	0.87	4.32	1.15291e-10	2.42112e-08	DYNLL1;TNFAIP3;HSPA1A;HSPH1;NFKBIA;DNAJB1;NFATC2;BAG3;NFKB2;HSPA8;HSPA1B;HSP90AA1;TCIM;ACTG2;MELK;CDK2;NFKB1;ACTA2;TAGLN;ZFP36;TUBB;CALCA;HSP90AB1;CHAF1B;KIF18B;LRP2BP;BIRC3;ZWINT;MCM2;CEP55;CDC6;CD34;HSPB1;XRCC3;CA2;NFATC1;MAK;TEKT1;LGALS3;KIF4A;CCNE1
GO:0042555_MCM_complex	12	41.67	234.06	2.35438e-10	3.70815e-08	MCM4;MCM3;MCM5;MCM2;MCM6
GO:0005829_cytosol	5138	0.82	4.05	5.05132e-10	6.36467e-08	DYNLL2;DYNLL1;TNFAIP3;HSPA1A;RELB;HSPH1;NFKBIA;DNAJB1;NFATC2;BAG3;NFKB2;HSPA8;HSPA1B;HSP90AA1;TCIM;NAMPT;ACTG2;DNAJA1;CDK2;NFKB1;ACTA2;RSU1;ZFP36;SPC24;HSP90AB1;CHAF1B;KIF18B;BIRC3;RAB39A;ZWINT;MCM5;CDC6;HSPB1;XRCC3;DTL;CA2;NFATC1;CDCA7L;KIF4A;CCNE1;PLA2G4C;FANCI
GO:0000784_nuclear_chromosome,_telomeric_region	124	5.65	20.14	1.51999e-07	1.59599e-05	MCM4;MCM3;MCM5;MCM2;XRCC3;MCM6;RPA1
GO:0005813_centrosome	506	2.17	7.77	6.6688e-07	6.00192e-05	DYNLL2;DYNLL1;HSPA1A;RELB;HSPA1B;CDK2;MCM3;CEP55;DTL;MAK;CCNE1
GO:0070062_extracellular_exosome	2130	0.99	3.77	2.7012e-06	0.00021272	VCAM1;TNFAIP3;HSPA1A;HSPH1;DNAJB1;ICAM1;HSPA8;HSPA1B;HSP90AA1;NAMPT;ACTG2;DNAJA1;ACTA2;RSU1;TUBB;HSP90AB1;HSPB1;EGF;CA2;REXO5;LGALS3
GO:0008180_COP9_signalosome	36	11.11	40.62	5.38455e-06	0.000376918	DYNLL1;HSPA1A;HSPA1B;HSP90AB1
GO:0005615_extracellular_space	1724	0.99	3.61	2.90779e-05	0.00182088	VCAM1;CXCL10;ICAM1;CCL2;HSPA8;CXCL3;TNFAIP2;SELE;ACTG2;ACTA2;SCARA3;COL11A1;CALCA;HSPB1;EGF;GLIPR1;LGALS3
GO:0016020_membrane	2109	0.9	3.34	3.17931e-05	0.00182088	DYNLL2;DYNLL1;BAG3;ICAM1;HSPA8;HSP90AA1;MCM4;MELK;DNAJA1;MCM3;HSP90AB1;MCM5;CEP55;KIFC1;GLIPR1;LGALS3;KIF4A;PLA2G4C;FANCI
GO:0016234_inclusion_body	20	15	56.68	3.49733e-05	0.0018361	HSPA1A;HSPA1B;HSP90AB1
GO:0032991_protein-containing_complex	644	1.55	5.41	4.11045e-05	0.00199199	HSPA1A;RELB;HSPH1;HSPA1B;HSP90AA1;ACTA2;TUBB;HSP90AB1;CHAF1B;BIRC3
GO:1904813_ficolin-1-rich_granule_lumen	124	4.03	13.79	5.04947e-05	0.00227226	HSPA1A;HSPA8;HSPA1B;HSP90AA1;HSP90AB1
GO:0005874_microtubule	305	2.3	7.85	5.75569e-05	0.00241739	DYNLL2;DYNLL1;HSPH1;TUBB;KIF18B;KIFC1;TEKT1
GO:0048471_perinuclear_region_of_cytoplasm	702	1.42	4.95	8.42347e-05	0.00331674	HSPA1A;HSPA8;HSPA1B;HSP90AA1;SELE;DNAJA1;MCM3;HSP90AB1;CD34;XRCC3
GO:1990904_ribonucleoprotein_complex	154	3.25	11	0.000140618	0.00521113	HSPA1A;NFATC2;HSPA8;HSPA1B;ZFP36
GO:0005576_extracellular_region	1802	0.89	3.19	0.000176629	0.006182	HSPA1A;HSPH1;CXCL10;CCL2;HSPA8;HSPA1B;HSP90AA1;CXCL3;C17orf67;NFKB1;COL11A1;TUBB;CALCA;HSP90AB1;EGF;LGALS3
GO:0016235_aggresome	39	7.69	26.77	0.000268287	0.00889584	HSPA1A;BAG3;HSPA1B
GO:0034774_secretory_granule_lumen	115	3.48	11.69	0.00052122	0.0156366	HSPA8;HSP90AA1;NFKB1;HSP90AB1
GO:0072562_blood_microparticle	115	3.48	11.69	0.00052122	0.0156366	HSPA1A;HSPA8;HSPA1B;ACTG2
GO:0101031_chaperone_complex	13	15.38	57.71	0.00077602	0.0222224	BAG3;HSPA8
GO:0005869_dynactin_complex	16	12.5	45.33	0.00118643	0.0311437	ACTG2;ACTA2
GO:0071682_endocytic_vesicle_lumen	16	12.5	45.33	0.00118643	0.0311437	HSPH1;HSP90AA1
GO:0030175_filopodium	72	4.17	13.95	0.00162228	0.0408815	VCAM1;ACTG2;ACTA2
GO:0044297_cell_body	76	3.95	13.18	0.0018947	0.04591	ACTG2;ACTA2;TUBB
GO:0005868_cytoplasmic_dynein_complex	21	9.52	33.42	0.00205472	0.0479436	DYNLL2;DYNLL1
GO:0005925_focal_adhesion	415	1.45	4.82	0.0022062	0.0496396	HSPA1A;ICAM1;HSPA8;HSPA1B;RSU1;HSPB1
GO:0005886_plasma_membrane	4416	0.57	2.08	0.00245587	0.0533517	DYNLL2;DYNLL1;VCAM1;HSPA1A;NFKBIA;BAG3;ICAM1;HSPA8;HSPA1B;HSP90AA1;TCIM;NAMPT;SELE;MELK;F2RL1;HSP90AB1;CD83;RAB39A;CEP55;CD34;HSPB1;EGF;CA2;GLIPR1;LGALS3
GO:0090734_site_of_DNA_damage	24	8.33	28.86	0.00268368	0.0563572	WDR76;RPA1
GO:0009897_external_side_of_plasma_membrane	303	1.65	5.47	0.00295228	0.058123	VCAM1;CXCL10;ICAM1;CD83;CD34
GO:0030286_dynein_complex	25	8	27.61	0.00291098	0.058123	DYNLL2;DYNLL1
GO:0043209_myelin_sheath	28	7.14	24.43	0.00364501	0.0695866	HSP90AA1;CA2
GO:0000307_cyclin-dependent_protein_kinase_holoenzyme_complex	30	6.67	22.68	0.00417725	0.0711262	CDK2;CCNE1
GO:0042470_melanosome	99	3.03	10.02	0.00400946	0.0711262	HSPA8;HSP90AA1;HSP90AB1
GO:0044295_axonal_growth_cone	29	6.9	23.52	0.00390688	0.0711262	HSP90AA1;HSP90AB1
GO:0072686_mitotic_spindle	100	3	9.91	0.00412398	0.0711262	DYNLL1;KIFC1;MAK
GO:0005667_transcription_regulator_complex	209	1.91	6.31	0.00463773	0.0768887	NFATC2;CDK2;RFX5;NFATC1
GO:0005730_nucleolus	1245	0.8	2.71	0.00650226	0.105036	DNAJB1;ATF3;HSPA8;TCIM;SPC24;MCM10;DTL;PIMREG;CDCA7L;REXO5
GO:0001772_immunological_synapse	39	5.13	17.15	0.00698399	0.108922	ICAM1;LGALS3
GO:0045121_membrane_raft	236	1.69	5.57	0.00708859	0.108922	ICAM1;SELE;TUBB;BIRC3
GO:0097542_ciliary_tip	46	4.35	14.43	0.00961449	0.144217	DYNLL2;DYNLL1
GO:0005764_lysosome	261	1.53	5.02	0.0100102	0.146662	TNFAIP3;HSPA8;RAB39A;CD34
GO:0005871_kinesin_complex	48	4.17	13.8	0.0104351	0.149412	KIF18B;KIFC1
GO:0005814_centriole	143	2.1	6.86	0.011029	0.154406	HSPA1A;HSPA1B;CEP55
GO:0043195_terminal_bouton	54	3.7	12.2	0.0130749	0.179069	HSPA8;CALCA
GO:0000790_nuclear_chromatin	1190	0.76	2.53	0.014039	0.186331	RELB;NFATC2;NFKB2;ATF3;NFKB1;RFX5;CHAF1B;NFATC1;MAFF
GO:0015630_microtubule_cytoskeleton	158	1.9	6.19	0.0144052	0.186331	DNAJA1;MCM2;TEKT1
GO:1904115_axon_cytoplasm	57	3.51	11.53	0.0144924	0.186331	HSPB1;KIF4A
GO:0030496_midbody	161	1.86	6.07	0.015143	0.190802	CEP55;MAK;KIF4A
GO:0101003_ficolin-1-rich_granule_membrane	60	3.33	10.94	0.0159732	0.197316	DYNLL1;LGALS3
GO:0005739_mitochondrion	1266	0.71	2.37	0.0201779	0.244463	DYNLL1;HSPA1A;HSPA1B;HSP90AA1;DNAJA1;NFKB1;HSP90AB1;XRCC3;MAFF
GO:0005902_microvillus	70	2.86	9.32	0.0213493	0.253775	VCAM1;CA2
GO:0045171_intercellular_bridge	71	2.82	9.19	0.021923	0.255768	CEP55;CD34
GO:0045177_apical_part_of_cell	76	2.63	8.57	0.0248858	0.285056	VCAM1;CA2
GO:0005664_nuclear_origin_of_replication_recognition_complex	9	11.11	39.22	0.02852	0.32085	MCM2
GO:0005929_cilium	209	1.44	4.65	0.0298366	0.329773	DYNLL2;DYNLL1;MAK
GO:0000777_condensed_chromosome_kinetochore	86	2.33	7.55	0.0312665	0.339619	SPC24;ZWINT
GO:0000776_kinetochore	87	2.3	7.46	0.0319367	0.340725	DYNLL1;ZWINT
GO:0062023_collagen-containing_extracellular_matrix	374	1.07	3.47	0.03245	0.340725	ICAM1;SCARA3;COL11A1;LGALS3
GO:0043025_neuronal_cell_body	377	1.06	3.44	0.0332702	0.343611	DNAJB1;HSP90AA1;CALCA;HSP90AB1
GO:0005681_spliceosomal_complex	91	2.2	7.12	0.0346735	0.352327	HSPA8;LGALS3
GO:0043202_lysosomal_lumen	94	2.13	6.89	0.0367839	0.367839	HSPA8;HSP90AA1
GO:0031464_Cul4A-RING_E3_ubiquitin_ligase_complex	12	8.33	28.54	0.0378468	0.372555	DTL
GO:0016607_nuclear_speck	400	1	3.24	0.0399617	0.387321	HSPA1A;HSPA1B;TCIM;NAMPT
GO:0000974_Prp19_complex	13	7.69	26.17	0.0409361	0.390753	HSPA8
GO:0009986_cell_surface	595	0.84	2.73	0.0426663	0.39614	VCAM1;ICAM1;HSP90AA1;HSP90AB1;LGALS3
GO:0031514_motile_cilium	103	1.94	6.27	0.0434006	0.39614	MAK;TEKT1
GO:0099523_presynaptic_cytosol	14	7.14	24.15	0.0440155	0.39614	HSPA8
GO:1990023_mitotic_spindle_midzone	14	7.14	24.15	0.0440155	0.39614	KIF18B
GO:0005662_DNA_replication_factor_A_complex	15	6.67	22.42	0.0470852	0.417798	RPA1
GO:0030014_CCR4-NOT_complex	16	6.25	20.92	0.0501451	0.426911	ZFP36
GO:0032982_myosin_filament	16	6.25	20.92	0.0501451	0.426911	ACTG2
GO:0035098_ESC/E(Z)_complex	16	6.25	20.92	0.0501451	0.426911	PHF19
GO:0005769_early_endosome	264	1.14	3.66	0.0532908	0.447643	VCAM1;F2RL1;KIFC1
GO:0031143_pseudopodium	18	5.56	18.46	0.0562358	0.460111	F2RL1
GO:0099524_postsynaptic_cytosol	18	5.56	18.46	0.0562358	0.460111	HSPA8
GO:0000145_exocyst	19	5.26	17.44	0.0592667	0.478692	TNFAIP2
GO:0030863_cortical_cytoskeleton	20	5	16.51	0.0622879	0.496727	SELE
GO:0030018_Z_disc	128	1.56	5.02	0.0638231	0.502607	BAG3;HSPB1
GO:0005694_chromosome	130	1.54	4.94	0.0655746	0.510025	DTL;KIF4A
GO:0097731_9+0_non-motile_cilium	22	4.55	14.95	0.0683017	0.524757	DYNLL2
GO:0035371_microtubule_plus-end	23	4.35	14.27	0.0712943	0.541149	KIF18B
GO:0005938_cell_cortex	142	1.41	4.52	0.0764119	0.572566	MELK;PLA2G4C
GO:0051233_spindle_midzone	25	4	13.07	0.0772509	0.572566	CDC6
GO:0000793_condensed_chromosome	26	3.85	12.55	0.0802151	0.572897	CDK2
GO:0005657_replication_fork	26	3.85	12.55	0.0802151	0.572897	XRCC3
GO:0005765_lysosomal_membrane	315	0.95	3.06	0.080933	0.572897	HSPA8;HSP90AB1;EGF
GO:0016604_nuclear_body	312	0.96	3.09	0.0791618	0.572897	KIF18B;ZWINT;NFATC1
GO:0000792_heterochromatin	27	3.7	12.07	0.0831698	0.582189	WDR76
GO:0002102_podosome	28	3.57	11.62	0.0861152	0.589702	VCAM1
GO:0080008_Cul4-RING_E3_ubiquitin_ligase_complex	28	3.57	11.62	0.0861152	0.589702	DTL
GO:0090543_Flemming_body	31	3.23	10.46	0.0948953	0.642839	CEP55
GO:0044853_plasma_membrane_raft	32	3.12	10.12	0.0978034	0.655491	HAS2
GO:0098978_glutamatergic_synapse	355	0.85	2.71	0.106134	0.703833	DYNLL2;DNAJB1;HSPA8
GO:0031982_vesicle	174	1.15	3.67	0.107716	0.706887	HSPA1A;HSPA1B
GO:0030027_lamellipodium	185	1.08	3.45	0.119156	0.7739	ACTG2;ACTA2
GO:0032391_photoreceptor_connecting_cilium	40	2.5	8.04	0.120738	0.776175	MAK
GO:0005876_spindle_microtubule	45	2.22	7.13	0.134779	0.857685	KIF4A
GO:0009925_basal_plasma_membrane	51	1.96	6.27	0.151336	0.937118	CD34
GO:0016323_basolateral_plasma_membrane	215	0.93	2.96	0.151724	0.937118	HSP90AB1;CA2
GO:0071944_cell_periphery	51	1.96	6.27	0.151336	0.937118	ACTG2
GO:0005887_integral_component_of_plasma_membrane	1389	0.5	1.62	0.157985	0.956977	VCAM1;ICAM1;SELE;F2RL1;CD83;CD34;HAS2
GO:0017053_transcription_repressor_complex	54	1.85	5.92	0.159496	0.956977	RELB
GO:0032154_cleavage_furrow	53	1.89	6.03	0.156785	0.956977	CEP55
GO:0000502_proteasome_complex	56	1.79	5.7	0.164893	0.961878	HSPB1
GO:0000781_chromosome,_telomeric_region	56	1.79	5.7	0.164893	0.961878	CDK2
GO:0030665_clathrin-coated_vesicle_membrane	56	1.79	5.7	0.164893	0.961878	EGF
GO:0001917_photoreceptor_inner_segment	59	1.69	5.41	0.172925	0.972703	MAK
GO:0005905_clathrin-coated_pit	59	1.69	5.41	0.172925	0.972703	SELE
GO:0031526_brush_border_membrane	58	1.72	5.5	0.170256	0.972703	HSP90AB1
GO:0035577_azurophil_granule_membrane	58	1.72	5.5	0.170256	0.972703	GLIPR1
GO:0005581_collagen_trimer	60	1.67	5.31	0.175585	0.978926	SCARA3
GO:0035580_specific_granule_lumen	62	1.61	5.14	0.18088	0.999602	NFKB1
GO:0000118_histone_deacetylase_complex	44	0	0	1	1
GO:0000123_histone_acetyltransferase_complex	24	0	0	1	1
GO:0000124_SAGA_complex	12	0	0	1	1
GO:0000127_transcription_factor_TFIIIC_complex	6	0	0	1	1
GO:0000137_Golgi_cis_cisterna	29	0	0	1	1
GO:0000139_Golgi_membrane	617	0.32	1.01	0.59214	1	SCARA3;RAB39A
GO:0000151_ubiquitin_ligase_complex	107	0	0	1	1
GO:0000159_protein_phosphatase_type_2A_complex	19	0	0	1	1
GO:0000164_protein_phosphatase_type_1_complex	15	0	0	1	1
GO:0000172_ribonuclease_MRP_complex	9	0	0	1	1
GO:0000176_nuclear_exosome_(RNase_complex)	16	0	0	1	1
GO:0000177_cytoplasmic_exosome_(RNase_complex)	12	0	0	1	1
GO:0000178_exosome_(RNase_complex)	18	0	0	1	1
GO:0000228_nuclear_chromosome	52	0	0	1	1
GO:0000242_pericentriolar_material	21	0	0	1	1
GO:0000346_transcription_export_complex	13	0	0	1	1
GO:0000407_phagophore_assembly_site	23	0	0	1	1
GO:0000421_autophagosome_membrane	33	0	0	1	1
GO:0000439_transcription_factor_TFIIH_core_complex	12	0	0	1	1
GO:0000445_THO_complex_part_of_transcription_export_complex	6	0	0	1	1
GO:0000506_glycosylphosphatidylinositol-N-acetylglucosaminyltransferase_(GPI-GnT)_complex	8	0	0	1	1
GO:0000775_chromosome,_centromeric_region	52	0	0	1	1
GO:0000778_condensed_nuclear_chromosome_kinetochore	11	0	0	1	1
GO:0000780_condensed_nuclear_chromosome,_centromeric_region	18	0	0	1	1
GO:0000783_nuclear_telomere_cap_complex	9	0	0	1	1
GO:0000785_chromatin	126	0.79	2.5	0.333672	1	MCM2
GO:0000786_nucleosome	94	0	0	1	1
GO:0000788_nuclear_nucleosome	39	0	0	1	1
GO:0000794_condensed_nuclear_chromosome	28	0	0	1	1
GO:0000795_synaptonemal_complex	28	0	0	1	1
GO:0000800_lateral_element	14	0	0	1	1
GO:0000801_central_element	8	0	0	1	1
GO:0000812_Swr1_complex	12	0	0	1	1
GO:0000813_ESCRT_I_complex	10	0	0	1	1
GO:0000815_ESCRT_III_complex	10	0	0	1	1
GO:0000922_spindle_pole	121	0.83	2.61	0.322826	1	CDC6
GO:0000930_gamma-tubulin_complex	15	0	0	1	1
GO:0000932_P-body	88	1.14	3.6	0.246732	1	ZFP36
GO:0000940_condensed_chromosome_outer_kinetochore	10	0	0	1	1
GO:0001401_SAM_complex	13	0	0	1	1
GO:0001518_voltage-gated_sodium_channel_complex	17	0	0	1	1
GO:0001527_microfibril	10	0	0	1	1
GO:0001533_cornified_envelope	45	0	0	1	1
GO:0001650_fibrillar_center	129	0.78	2.44	0.340097	1	CDCA7L
GO:0001669_acrosomal_vesicle	94	0	0	1	1
GO:0001673_male_germ_cell_nucleus	14	0	0	1	1
GO:0001725_stress_fiber	68	1.47	4.68	0.196565	1	BAG3
GO:0001726_ruffle	98	0	0	1	1
GO:0001741_XY_body	13	0	0	1	1
GO:0001750_photoreceptor_outer_segment	64	1.56	4.98	0.186142	1	MAK
GO:0001891_phagocytic_cup	27	0	0	1	1
GO:0001931_uropod	12	0	0	1	1
GO:0002080_acrosomal_membrane	22	0	0	1	1
GO:0002116_semaphorin_receptor_complex	11	0	0	1	1
GO:0002177_manchette	11	0	0	1	1
GO:0005575_cellular_component	434	0.23	0.71	0.755	1	CHORDC1
GO:0005604_basement_membrane	93	0	0	1	1
GO:0005614_interstitial_matrix	13	0	0	1	1
GO:0005622_intracellular	122	0	0	1	1
GO:0005635_nuclear_envelope	183	0.55	1.71	0.445816	1	PLA2G4C
GO:0005637_nuclear_inner_membrane	48	0	0	1	1
GO:0005639_integral_component_of_nuclear_inner_membrane	15	0	0	1	1
GO:0005640_nuclear_outer_membrane	27	0	0	1	1
GO:0005643_nuclear_pore	65	0	0	1	1
GO:0005665_RNA_polymerase_II,_core_complex	15	0	0	1	1
GO:0005666_RNA_polymerase_III_complex	18	0	0	1	1
GO:0005669_transcription_factor_TFIID_complex	33	0	0	1	1
GO:0005671_Ada2/Gcn5/Ada3_transcription_activator_complex	15	0	0	1	1
GO:0005675_transcription_factor_TFIIH_holo_complex	13	0	0	1	1
GO:0005680_anaphase-promoting_complex	22	0	0	1	1
GO:0005682_U5_snRNP	21	0	0	1	1
GO:0005684_U2-type_spliceosomal_complex	12	0	0	1	1
GO:0005685_U1_snRNP	33	0	0	1	1
GO:0005686_U2_snRNP	21	0	0	1	1
GO:0005687_U4_snRNP	12	0	0	1	1
GO:0005688_U6_snRNP	13	0	0	1	1
GO:0005689_U12-type_spliceosomal_complex	28	0	0	1	1
GO:0005697_telomerase_holoenzyme_complex	21	0	0	1	1
GO:0005719_nuclear_euchromatin	34	0	0	1	1
GO:0005720_nuclear_heterochromatin	22	0	0	1	1
GO:0005721_pericentric_heterochromatin	14	0	0	1	1
GO:0005736_RNA_polymerase_I_complex	13	0	0	1	1
GO:0005741_mitochondrial_outer_membrane	166	0	0	1	1
GO:0005742_mitochondrial_outer_membrane_translocase_complex	9	0	0	1	1
GO:0005743_mitochondrial_inner_membrane	400	0.25	0.78	0.726232	1	LGALS3
GO:0005744_TIM23_mitochondrial_import_inner_membrane_translocase_complex	10	0	0	1	1
GO:0005746_mitochondrial_respirasome	15	0	0	1	1
GO:0005747_mitochondrial_respiratory_chain_complex_I	50	0	0	1	1
GO:0005750_mitochondrial_respiratory_chain_complex_III	13	0	0	1	1
GO:0005751_mitochondrial_respiratory_chain_complex_IV	12	0	0	1	1
GO:0005753_mitochondrial_proton-transporting_ATP_synthase_complex	18	0	0	1	1
GO:0005758_mitochondrial_intermembrane_space	78	0	0	1	1
GO:0005759_mitochondrial_matrix	371	0	0	1	1
GO:0005761_mitochondrial_ribosome	24	0	0	1	1
GO:0005762_mitochondrial_large_ribosomal_subunit	57	0	0	1	1
GO:0005763_mitochondrial_small_ribosomal_subunit	28	0	0	1	1
GO:0005768_endosome	294	0.34	1.06	0.613363	1	CDK2
GO:0005770_late_endosome	138	0.72	2.28	0.359007	1	HSPA8
GO:0005771_multivesicular_body	42	0	0	1	1
GO:0005773_vacuole	15	0	0	1	1
GO:0005774_vacuolar_membrane	21	0	0	1	1
GO:0005776_autophagosome	69	1.45	4.61	0.19915	1	HSPA8
GO:0005777_peroxisome	106	0	0	1	1
GO:0005778_peroxisomal_membrane	57	0	0	1	1
GO:0005779_integral_component_of_peroxisomal_membrane	15	0	0	1	1
GO:0005782_peroxisomal_matrix	52	0	0	1	1
GO:0005783_endoplasmic_reticulum	1022	0.29	0.91	0.641975	1	VCAM1;HSPA1A;HSPA1B
GO:0005786_signal_recognition_particle,_endoplasmic_reticulum_targeting	14	0	0	1	1
GO:0005788_endoplasmic_reticulum_lumen	299	0.33	1.04	0.619596	1	COL11A1
GO:0005789_endoplasmic_reticulum_membrane	944	0.21	0.65	0.810996	1	SCARA3;PLA2G4C
GO:0005790_smooth_endoplasmic_reticulum	27	0	0	1	1
GO:0005791_rough_endoplasmic_reticulum	55	0	0	1	1
GO:0005793_endoplasmic_reticulum-Golgi_intermediate_compartment	77	0	0	1	1
GO:0005794_Golgi_apparatus	1002	0.3	0.93	0.628579	1	VCAM1;F2RL1;RAB39A
GO:0005795_Golgi_stack	37	0	0	1	1
GO:0005796_Golgi_lumen	102	0	0	1	1
GO:0005797_Golgi_medial_cisterna	10	0	0	1	1
GO:0005798_Golgi-associated_vesicle	17	0	0	1	1
GO:0005801_cis-Golgi_network	65	0	0	1	1
GO:0005802_trans-Golgi_network	172	0	0	1	1
GO:0005811_lipid_droplet	93	1.08	3.4	0.258783	1	PLA2G4C
GO:0005815_microtubule_organizing_center	96	1.04	3.3	0.265921	1	KIFC1
GO:0005819_spindle	122	0.82	2.59	0.325009	1	HSPB1
GO:0005832_chaperonin-containing_T-complex	10	0	0	1	1
GO:0005833_hemoglobin_complex	12	0	0	1	1
GO:0005834_heterotrimeric_G-protein_complex	34	0	0	1	1
GO:0005839_proteasome_core_complex	20	0	0	1	1
GO:0005840_ribosome	67	0	0	1	1
GO:0005844_polysome	40	0	0	1	1
GO:0005845_mRNA_cap_binding_complex	11	0	0	1	1
GO:0005847_mRNA_cleavage_and_polyadenylation_specificity_factor_complex	18	0	0	1	1
GO:0005851_eukaryotic_translation_initiation_factor_2B_complex	6	0	0	1	1
GO:0005852_eukaryotic_translation_initiation_factor_3_complex	17	0	0	1	1
GO:0005856_cytoskeleton	406	0.49	1.55	0.375214	1	TUBB;HSPB1
GO:0005858_axonemal_dynein_complex	11	0	0	1	1
GO:0005859_muscle_myosin_complex	15	0	0	1	1
GO:0005861_troponin_complex	9	0	0	1	1
GO:0005865_striated_muscle_thin_filament	10	0	0	1	1
GO:0005875_microtubule_associated_complex	32	0	0	1	1
GO:0005881_cytoplasmic_microtubule	60	0	0	1	1
GO:0005882_intermediate_filament	107	0	0	1	1
GO:0005884_actin_filament	86	0	0	1	1
GO:0005885_Arp2/3_protein_complex	11	0	0	1	1
GO:0005890_sodium:potassium-exchanging_ATPase_complex	12	0	0	1	1
GO:0005891_voltage-gated_calcium_channel_complex	27	0	0	1	1
GO:0005892_acetylcholine-gated_channel_complex	16	0	0	1	1
GO:0005901_caveola	75	1.33	4.23	0.214488	1	SELE
GO:0005903_brush_border	55	0	0	1	1
GO:0005911_cell-cell_junction	187	0	0	1	1
GO:0005912_adherens_junction	157	0	0	1	1
GO:0005921_gap_junction	19	0	0	1	1
GO:0005922_connexin_complex	21	0	0	1	1
GO:0005923_bicellular_tight_junction	122	0	0	1	1
GO:0005930_axoneme	104	0.96	3.04	0.284627	1	MAK
GO:0005940_septin_ring	14	0	0	1	1
GO:0005942_phosphatidylinositol_3-kinase_complex	22	0	0	1	1
GO:0005952_cAMP-dependent_protein_kinase_complex	10	0	0	1	1
GO:0008021_synaptic_vesicle	131	0	0	1	1
GO:0008023_transcription_elongation_factor_complex	22	0	0	1	1
GO:0008076_voltage-gated_potassium_channel_complex	85	0	0	1	1
GO:0008250_oligosaccharyltransferase_complex	12	0	0	1	1
GO:0008274_gamma-tubulin_ring_complex	8	0	0	1	1
GO:0008278_cohesin_complex	10	0	0	1	1
GO:0008305_integrin_complex	25	0	0	1	1
GO:0008328_ionotropic_glutamate_receptor_complex	12	0	0	1	1
GO:0008385_IkappaB_kinase_complex	9	0	0	1	1
GO:0008540_proteasome_regulatory_particle,_base_subcomplex	12	0	0	1	1
GO:0009898_cytoplasmic_side_of_plasma_membrane	52	0	0	1	1
GO:0010008_endosome_membrane	222	0	0	1	1
GO:0010369_chromocenter	13	0	0	1	1
GO:0010494_cytoplasmic_stress_granule	74	1.35	4.29	0.211952	1	ZFP36
GO:0012505_endomembrane_system	125	0	0	1	1
GO:0012506_vesicle_membrane	30	0	0	1	1
GO:0012507_ER_to_Golgi_transport_vesicle_membrane	52	0	0	1	1
GO:0014069_postsynaptic_density	252	0.79	2.52	0.193909	1	DYNLL2;DNAJB1
GO:0014701_junctional_sarcoplasmic_reticulum_membrane	9	0	0	1	1
GO:0014704_intercalated_disc	46	0	0	1	1
GO:0015030_Cajal_body	71	1.41	4.48	0.204295	1	CDK2
GO:0015629_actin_cytoskeleton	245	0.82	2.59	0.185801	1	ACTG2;ACTA2
GO:0015935_small_ribosomal_subunit	20	0	0	1	1
GO:0016010_dystrophin-associated_glycoprotein_complex	17	0	0	1	1
GO:0016021_integral_component_of_membrane	3570	0.08	0.23	0.999547	1	SCARA3;EGF;GLIPR1
GO:0016281_eukaryotic_translation_initiation_factor_4F_complex	13	0	0	1	1
GO:0016282_eukaryotic_43S_preinitiation_complex	17	0	0	1	1
GO:0016324_apical_plasma_membrane	353	0.57	1.79	0.313382	1	HSP90AB1;CD34
GO:0016327_apicolateral_plasma_membrane	19	0	0	1	1
GO:0016328_lateral_plasma_membrane	65	0	0	1	1
GO:0016342_catenin_complex	31	0	0	1	1
GO:0016363_nuclear_matrix	109	0.92	2.9	0.296077	1	KIF4A
GO:0016442_RISC_complex	16	0	0	1	1
GO:0016459_myosin_complex	32	0	0	1	1
GO:0016471_vacuolar_proton-transporting_V-type_ATPase_complex	14	0	0	1	1
GO:0016514_SWI/SNF_complex	19	0	0	1	1
GO:0016529_sarcoplasmic_reticulum	44	0	0	1	1
GO:0016580_Sin3_complex	13	0	0	1	1
GO:0016581_NuRD_complex	15	0	0	1	1
GO:0016591_RNA_polymerase_II,_holoenzyme	7	0	0	1	1
GO:0016592_mediator_complex	41	0	0	1	1
GO:0016593_Cdc73/Paf1_complex	8	0	0	1	1
GO:0016600_flotillin_complex	8	0	0	1	1
GO:0016605_PML_body	101	0.99	3.13	0.277668	1	RPA1
GO:0017101_aminoacyl-tRNA_synthetase_multienzyme_complex	11	0	0	1	1
GO:0017119_Golgi_transport_complex	13	0	0	1	1
GO:0017146_NMDA_selective_glutamate_receptor_complex	11	0	0	1	1
GO:0019005_SCF_ubiquitin_ligase_complex	63	0	0	1	1
GO:0019773_proteasome_core_complex,_alpha-subunit_complex	8	0	0	1	1
GO:0019774_proteasome_core_complex,_beta-subunit_complex	11	0	0	1	1
GO:0019814_immunoglobulin_complex	0	NA	0	1	1
GO:0019897_extrinsic_component_of_plasma_membrane	23	0	0	1	1
GO:0019898_extrinsic_component_of_membrane	68	0	0	1	1
GO:0022624_proteasome_accessory_complex	17	0	0	1	1
GO:0022625_cytosolic_large_ribosomal_subunit	56	0	0	1	1
GO:0022627_cytosolic_small_ribosomal_subunit	46	0	0	1	1
GO:0030008_TRAPP_complex	15	0	0	1	1
GO:0030016_myofibril	29	0	0	1	1
GO:0030017_sarcomere	46	0	0	1	1
GO:0030054_cell_junction	192	0.52	1.63	0.461729	1	NAMPT
GO:0030057_desmosome	25	0	0	1	1
GO:0030122_AP-2_adaptor_complex	11	0	0	1	1
GO:0030126_COPI_vesicle_coat	13	0	0	1	1
GO:0030127_COPII_vesicle_coat	15	0	0	1	1
GO:0030133_transport_vesicle	92	0	0	1	1
GO:0030134_COPII-coated_ER_to_Golgi_transport_vesicle	41	0	0	1	1
GO:0030136_clathrin-coated_vesicle	59	0	0	1	1
GO:0030137_COPI-coated_vesicle	11	0	0	1	1
GO:0030139_endocytic_vesicle	62	0	0	1	1
GO:0030140_trans-Golgi_network_transport_vesicle	17	0	0	1	1
GO:0030141_secretory_granule	91	0	0	1	1
GO:0030173_integral_component_of_Golgi_membrane	61	0	0	1	1
GO:0030176_integral_component_of_endoplasmic_reticulum_membrane	111	0	0	1	1
GO:0030285_integral_component_of_synaptic_vesicle_membrane	34	0	0	1	1
GO:0030315_T-tubule	45	0	0	1	1
GO:0030424_axon	311	0.64	2.03	0.263524	1	HSPA8;CA2
GO:0030425_dendrite	420	0.48	1.5	0.391203	1	HSPA8;ZWINT
GO:0030426_growth_cone	140	0	0	1	1
GO:0030532_small_nuclear_ribonucleoprotein_complex	14	0	0	1	1
GO:0030658_transport_vesicle_membrane	40	0	0	1	1
GO:0030659_cytoplasmic_vesicle_membrane	144	0	0	1	1
GO:0030660_Golgi-associated_vesicle_membrane	19	0	0	1	1
GO:0030666_endocytic_vesicle_membrane	66	0	0	1	1
GO:0030667_secretory_granule_membrane	99	1.01	3.19	0.272992	1	LGALS3
GO:0030669_clathrin-coated_endocytic_vesicle_membrane	31	0	0	1	1
GO:0030670_phagocytic_vesicle_membrane	74	1.35	4.29	0.211952	1	RAB39A
GO:0030672_synaptic_vesicle_membrane	68	0	0	1	1
GO:0030673_axolemma	15	0	0	1	1
GO:0030681_multimeric_ribonuclease_P_complex	10	0	0	1	1
GO:0030686_90S_preribosome	12	0	0	1	1
GO:0030687_preribosome,_large_subunit_precursor	22	0	0	1	1
GO:0030688_preribosome,_small_subunit_precursor	13	0	0	1	1
GO:0030864_cortical_actin_cytoskeleton	53	0	0	1	1
GO:0030867_rough_endoplasmic_reticulum_membrane	10	0	0	1	1
GO:0030870_Mre11_complex	7	0	0	1	1
GO:0030877_beta-catenin_destruction_complex	12	0	0	1	1
GO:0030897_HOPS_complex	12	0	0	1	1
GO:0030904_retromer_complex	21	0	0	1	1
GO:0030914_STAGA_complex	12	0	0	1	1
GO:0030915_Smc5-Smc6_complex	7	0	0	1	1
GO:0030991_intraciliary_transport_particle_A	7	0	0	1	1
GO:0030992_intraciliary_transport_particle_B	19	0	0	1	1
GO:0031011_Ino80_complex	15	0	0	1	1
GO:0031012_extracellular_matrix	245	0.41	1.28	0.546681	1	COL11A1
GO:0031045_dense_core_granule	14	0	0	1	1
GO:0031080_nuclear_pore_outer_ring	10	0	0	1	1
GO:0031083_BLOC-1_complex	15	0	0	1	1
GO:0031089_platelet_dense_granule_lumen	14	0	0	1	1
GO:0031090_organelle_membrane	16	0	0	1	1
GO:0031091_platelet_alpha_granule	15	0	0	1	1
GO:0031092_platelet_alpha_granule_membrane	17	0	0	1	1
GO:0031093_platelet_alpha_granule_lumen	67	1.49	4.75	0.193971	1	EGF
GO:0031105_septin_complex	14	0	0	1	1
GO:0031201_SNARE_complex	50	0	0	1	1
GO:0031209_SCAR_complex	10	0	0	1	1
GO:0031224_intrinsic_component_of_membrane	13	0	0	1	1
GO:0031225_anchored_component_of_membrane	102	0	0	1	1
GO:0031226_intrinsic_component_of_plasma_membrane	37	0	0	1	1
GO:0031227_intrinsic_component_of_endoplasmic_reticulum_membrane	9	0	0	1	1
GO:0031234_extrinsic_component_of_cytoplasmic_side_of_plasma_membrane	65	0	0	1	1
GO:0031252_cell_leading_edge	47	0	0	1	1
GO:0031253_cell_projection_membrane	13	0	0	1	1
GO:0031258_lamellipodium_membrane	22	0	0	1	1
GO:0031301_integral_component_of_organelle_membrane	10	0	0	1	1
GO:0031305_integral_component_of_mitochondrial_inner_membrane	40	0	0	1	1
GO:0031307_integral_component_of_mitochondrial_outer_membrane	23	0	0	1	1
GO:0031314_extrinsic_component_of_mitochondrial_inner_membrane	14	0	0	1	1
GO:0031362_anchored_component_of_external_side_of_plasma_membrane	19	0	0	1	1
GO:0031410_cytoplasmic_vesicle	289	0.35	1.08	0.607029	1	HAS2
GO:0031428_box_C/D_snoRNP_complex	7	0	0	1	1
GO:0031429_box_H/ACA_snoRNP_complex	5	0	0	1	1
GO:0031430_M_band	25	0	0	1	1
GO:0031461_cullin-RING_ubiquitin_ligase_complex	13	0	0	1	1
GO:0031462_Cul2-RING_ubiquitin_ligase_complex	14	0	0	1	1
GO:0031463_Cul3-RING_ubiquitin_ligase_complex	36	0	0	1	1
GO:0031519_PcG_protein_complex	27	0	0	1	1
GO:0031527_filopodium_membrane	18	0	0	1	1
GO:0031528_microvillus_membrane	26	0	0	1	1
GO:0031588_nucleotide-activated_protein_kinase_complex	9	0	0	1	1
GO:0031594_neuromuscular_junction	76	0	0	1	1
GO:0031616_spindle_pole_centrosome	15	0	0	1	1
GO:0031672_A_band	12	0	0	1	1
GO:0031674_I_band	20	0	0	1	1
GO:0031680_G-protein_beta/gamma-subunit_complex	12	0	0	1	1
GO:0031838_haptoglobin-hemoglobin_complex	11	0	0	1	1
GO:0031901_early_endosome_membrane	158	0	0	1	1
GO:0031902_late_endosome_membrane	120	0	0	1	1
GO:0031904_endosome_lumen	18	0	0	1	1
GO:0031931_TORC1_complex	8	0	0	1	1
GO:0031932_TORC2_complex	12	0	0	1	1
GO:0031941_filamentous_actin	34	0	0	1	1
GO:0031965_nuclear_membrane	238	0.42	1.31	0.536271	1	DTL
GO:0031966_mitochondrial_membrane	110	0.91	2.87	0.298346	1	PLA2G4C
GO:0031985_Golgi_cisterna	9	0	0	1	1
GO:0032009_early_phagosome	12	0	0	1	1
GO:0032039_integrator_complex	28	0	0	1	1
GO:0032040_small-subunit_processome	39	0	0	1	1
GO:0032045_guanyl-nucleotide_exchange_factor_complex	12	0	0	1	1
GO:0032153_cell_division_site	14	0	0	1	1
GO:0032281_AMPA_glutamate_receptor_complex	26	0	0	1	1
GO:0032300_mismatch_repair_complex	8	0	0	1	1
GO:0032420_stereocilium	34	0	0	1	1
GO:0032426_stereocilium_tip	18	0	0	1	1
GO:0032432_actin_filament_bundle	10	0	0	1	1
GO:0032433_filopodium_tip	18	0	0	1	1
GO:0032580_Golgi_cisterna_membrane	92	0	0	1	1
GO:0032585_multivesicular_body_membrane	13	0	0	1	1
GO:0032587_ruffle_membrane	95	0	0	1	1
GO:0032588_trans-Golgi_network_membrane	92	0	0	1	1
GO:0032590_dendrite_membrane	30	0	0	1	1
GO:0032591_dendritic_spine_membrane	14	0	0	1	1
GO:0032592_integral_component_of_mitochondrial_membrane	10	0	0	1	1
GO:0032593_insulin-responsive_compartment	10	0	0	1	1
GO:0032797_SMN_complex	11	0	0	1	1
GO:0032809_neuronal_cell_body_membrane	28	0	0	1	1
GO:0032839_dendrite_cytoplasm	33	0	0	1	1
GO:0032993_protein-DNA_complex	44	0	0	1	1
GO:0033017_sarcoplasmic_reticulum_membrane	33	0	0	1	1
GO:0033018_sarcoplasmic_reticulum_lumen	9	0	0	1	1
GO:0033116_endoplasmic_reticulum-Golgi_intermediate_compartment_membrane	74	0	0	1	1
GO:0033162_melanosome_membrane	14	0	0	1	1
GO:0033268_node_of_Ranvier	15	0	0	1	1
GO:0033270_paranode_region_of_axon	12	0	0	1	1
GO:0033276_transcription_factor_TFTC_complex	14	0	0	1	1
GO:0033290_eukaryotic_48S_preinitiation_complex	15	0	0	1	1
GO:0033391_chromatoid_body	13	0	0	1	1
GO:0033588_Elongator_holoenzyme_complex	7	0	0	1	1
GO:0034045_phagophore_assembly_site_membrane	16	0	0	1	1
GO:0034098_VCP-NPL4-UFD1_AAA_ATPase_complex	8	0	0	1	1
GO:0034361_very-low-density_lipoprotein_particle	20	0	0	1	1
GO:0034362_low-density_lipoprotein_particle	13	0	0	1	1
GO:0034364_high-density_lipoprotein_particle	23	0	0	1	1
GO:0034366_spherical_high-density_lipoprotein_particle	8	0	0	1	1
GO:0034399_nuclear_periphery	14	0	0	1	1
GO:0034451_centriolar_satellite	95	1.05	3.33	0.263549	1	CEP55
GO:0034464_BBSome	8	0	0	1	1
GO:0034663_endoplasmic_reticulum_chaperone_complex	10	0	0	1	1
GO:0034704_calcium_channel_complex	24	0	0	1	1
GO:0034707_chloride_channel_complex	48	0	0	1	1
GO:0034709_methylosome	12	0	0	1	1
GO:0034719_SMN-Sm_protein_complex	17	0	0	1	1
GO:0034993_meiotic_nuclear_membrane_microtubule_tethering_complex	11	0	0	1	1
GO:0035097_histone_methyltransferase_complex	34	0	0	1	1
GO:0035102_PRC1_complex	15	0	0	1	1
GO:0035145_exon-exon_junction_complex	20	0	0	1	1
GO:0035253_ciliary_rootlet	11	0	0	1	1
GO:0035267_NuA4_histone_acetyltransferase_complex	20	0	0	1	1
GO:0035327_transcriptionally_active_chromatin	24	0	0	1	1
GO:0035578_azurophil_granule_lumen	91	1.1	3.48	0.253986	1	TUBB
GO:0035579_specific_granule_membrane	90	0	0	1	1
GO:0035631_CD40_receptor_complex	11	0	0	1	1
GO:0035770_ribonucleoprotein_granule	11	0	0	1	1
GO:0035861_site_of_double-strand_break	60	0	0	1	1
GO:0035869_ciliary_transition_zone	29	0	0	1	1
GO:0036020_endolysosome_membrane	14	0	0	1	1
GO:0036038_MKS_complex	13	0	0	1	1
GO:0036064_ciliary_basal_body	153	0	0	1	1
GO:0036126_sperm_flagellum	61	0	0	1	1
GO:0036128_CatSper_complex	10	0	0	1	1
GO:0036157_outer_dynein_arm	11	0	0	1	1
GO:0036449_microtubule_minus-end	8	0	0	1	1
GO:0036464_cytoplasmic_ribonucleoprotein_granule	78	1.28	4.07	0.222048	1	TUBB
GO:0036477_somatodendritic_compartment	13	0	0	1	1
GO:0042101_T_cell_receptor_complex	16	0	0	1	1
GO:0042383_sarcolemma	97	0	0	1	1
GO:0042405_nuclear_inclusion_body	12	0	0	1	1
GO:0042571_immunoglobulin_complex,_circulating	2	0	0	1	1
GO:0042581_specific_granule	13	0	0	1	1
GO:0042582_azurophil_granule	10	0	0	1	1
GO:0042589_zymogen_granule_membrane	11	0	0	1	1
GO:0042613_MHC_class_II_protein_complex	14	0	0	1	1
GO:0042622_photoreceptor_outer_segment_membrane	17	0	0	1	1
GO:0042627_chylomicron	13	0	0	1	1
GO:0042629_mast_cell_granule	22	0	0	1	1
GO:0042641_actomyosin	13	0	0	1	1
GO:0042645_mitochondrial_nucleoid	43	0	0	1	1
GO:0042734_presynaptic_membrane	67	0	0	1	1
GO:0042765_GPI-anchor_transamidase_complex	5	0	0	1	1
GO:0042788_polysomal_ribosome	32	0	0	1	1
GO:0042824_MHC_class_I_peptide_loading_complex	8	0	0	1	1
GO:0042995_cell_projection	127	0	0	1	1
GO:0043005_neuron_projection	338	0.3	0.92	0.664923	1	BAG3
GO:0043020_NADPH_oxidase_complex	12	0	0	1	1
GO:0043034_costamere	19	0	0	1	1
GO:0043083_synaptic_cleft	17	0	0	1	1
GO:0043186_P_granule	15	0	0	1	1
GO:0043194_axon_initial_segment	17	0	0	1	1
GO:0043197_dendritic_spine	162	0.62	1.94	0.406856	1	DNAJB1
GO:0043198_dendritic_shaft	38	0	0	1	1
GO:0043204_perikaryon	156	0	0	1	1
GO:0043220_Schmidt-Lanterman_incisure	11	0	0	1	1
GO:0043231_intracellular_membrane-bounded_organelle	791	0.13	0.39	0.924298	1	TNFAIP3
GO:0043235_receptor_complex	207	0	0	1	1
GO:0043240_Fanconi_anaemia_nuclear_complex	14	0	0	1	1
GO:0043296_apical_junction_complex	22	0	0	1	1
GO:0043596_nuclear_replication_fork	12	0	0	1	1
GO:0043657_host_cell	51	0	0	1	1
GO:0043679_axon_terminus	60	0	0	1	1
GO:0044214_spanning_component_of_plasma_membrane	12	0	0	1	1
GO:0044224_juxtaparanode_region_of_axon	10	0	0	1	1
GO:0044233_mitochondria-associated_endoplasmic_reticulum_membrane	16	0	0	1	1
GO:0044291_cell-cell_contact_zone	25	0	0	1	1
GO:0044305_calyx_of_Held	24	0	0	1	1
GO:0044306_neuron_projection_terminus	20	0	0	1	1
GO:0044322_endoplasmic_reticulum_quality_control_compartment	23	0	0	1	1
GO:0044327_dendritic_spine_head	12	0	0	1	1
GO:0044615_nuclear_pore_nuclear_basket	12	0	0	1	1
GO:0044666_MLL3/4_complex	13	0	0	1	1
GO:0045095_keratin_filament	93	0	0	1	1
GO:0045111_intermediate_filament_cytoskeleton	49	0	0	1	1
GO:0045178_basal_part_of_cell	15	0	0	1	1
GO:0045202_synapse	419	0	0	1	1
GO:0045211_postsynaptic_membrane	141	0	0	1	1
GO:0045334_clathrin-coated_endocytic_vesicle	26	0	0	1	1
GO:0045335_phagocytic_vesicle	66	1.52	4.82	0.19137	1	RAB39A
GO:0046540_U4/U6_x_U5_tri-snRNP_complex	43	0	0	1	1
GO:0046658_anchored_component_of_plasma_membrane	31	0	0	1	1
GO:0046930_pore_complex	13	0	0	1	1
GO:0048188_Set1C/COMPASS_complex	12	0	0	1	1
GO:0048786_presynaptic_active_zone	39	0	0	1	1
GO:0048787_presynaptic_active_zone_membrane	12	0	0	1	1
GO:0055037_recycling_endosome	126	0	0	1	1
GO:0055038_recycling_endosome_membrane	84	0	0	1	1
GO:0060076_excitatory_synapse	33	0	0	1	1
GO:0060077_inhibitory_synapse	14	0	0	1	1
GO:0060170_ciliary_membrane	55	0	0	1	1
GO:0061617_MICOS_complex	9	0	0	1	1
GO:0061700_GATOR2_complex	12	0	0	1	1
GO:0070160_tight_junction	16	0	0	1	1
GO:0070187_shelterin_complex	7	0	0	1	1
GO:0070382_exocytic_vesicle	26	0	0	1	1
GO:0070531_BRCA1-A_complex	8	0	0	1	1
GO:0070652_HAUS_complex	8	0	0	1	1
GO:0070776_MOZ/MORF_histone_acetyltransferase_complex	8	0	0	1	1
GO:0070821_tertiary_granule_membrane	72	1.39	4.41	0.206856	1	DYNLL1
GO:0070971_endoplasmic_reticulum_exit_site	31	0	0	1	1
GO:0071004_U2-type_prespliceosome	16	0	0	1	1
GO:0071005_U2-type_precatalytic_spliceosome	50	0	0	1	1
GO:0071006_U2-type_catalytic_step_1_spliceosome	12	0	0	1	1
GO:0071007_U2-type_catalytic_step_2_spliceosome	30	0	0	1	1
GO:0071011_precatalytic_spliceosome	19	0	0	1	1
GO:0071013_catalytic_step_2_spliceosome	85	0	0	1	1
GO:0071203_WASH_complex	12	0	0	1	1
GO:0071339_MLL1_complex	29	0	0	1	1
GO:0071437_invadopodium	10	0	0	1	1
GO:0071458_integral_component_of_cytoplasmic_side_of_endoplasmic_reticulum_membrane	6	0	0	1	1
GO:0071556_integral_component_of_lumenal_side_of_endoplasmic_reticulum_membrane	27	0	0	1	1
GO:0071564_npBAF_complex	12	0	0	1	1
GO:0071565_nBAF_complex	15	0	0	1	1
GO:0071782_endoplasmic_reticulum_tubular_network	16	0	0	1	1
GO:0071986_Ragulator_complex	6	0	0	1	1
GO:0072546_ER_membrane_protein_complex	10	0	0	1	1
GO:0072559_NLRP3_inflammasome_complex	9	0	0	1	1
GO:0072669_tRNA-splicing_ligase_complex	8	0	0	1	1
GO:0072687_meiotic_spindle	10	0	0	1	1
GO:0090575_RNA_polymerase_II_transcription_regulator_complex	61	0	0	1	1
GO:0090661_box_H/ACA_telomerase_RNP_complex	5	0	0	1	1
GO:0097038_perinuclear_endoplasmic_reticulum	17	0	0	1	1
GO:0097060_synaptic_membrane	28	0	0	1	1
GO:0097224_sperm_connecting_piece	9	0	0	1	1
GO:0097225_sperm_midpiece	29	0	0	1	1
GO:0097228_sperm_principal_piece	25	0	0	1	1
GO:0097381_photoreceptor_disc_membrane	23	0	0	1	1
GO:0097386_glial_cell_projection	13	0	0	1	1
GO:0097431_mitotic_spindle_pole	30	0	0	1	1
GO:0097440_apical_dendrite	17	0	0	1	1
GO:0097449_astrocyte_projection	12	0	0	1	1
GO:0097504_Gemini_of_coiled_bodies	12	0	0	1	1
GO:0097539_ciliary_transition_fiber	10	0	0	1	1
GO:0097546_ciliary_base	36	0	0	1	1
GO:0097730_non-motile_cilium	29	0	0	1	1
GO:0098685_Schaffer_collateral_-_CA1_synapse	84	0	0	1	1
GO:0098686_hippocampal_mossy_fiber_to_CA3_synapse	34	0	0	1	1
GO:0098688_parallel_fiber_to_Purkinje_cell_synapse	16	0	0	1	1
GO:0098691_dopaminergic_synapse	13	0	0	1	1
GO:0098793_presynapse	109	0	0	1	1
GO:0098794_postsynapse	93	1.08	3.4	0.258783	1	DYNLL2
GO:0098831_presynaptic_active_zone_cytoplasmic_component	13	0	0	1	1
GO:0098839_postsynaptic_density_membrane	39	0	0	1	1
GO:0098981_cholinergic_synapse	10	0	0	1	1
GO:0098982_GABA-ergic_synapse	70	0	0	1	1
GO:0098993_anchored_component_of_synaptic_vesicle_membrane	13	0	0	1	1
GO:0099055_integral_component_of_postsynaptic_membrane	45	0	0	1	1
GO:0099056_integral_component_of_presynaptic_membrane	59	0	0	1	1
GO:0099059_integral_component_of_presynaptic_active_zone_membrane	15	0	0	1	1
GO:0099060_integral_component_of_postsynaptic_specialization_membrane	25	0	0	1	1
GO:0099061_integral_component_of_postsynaptic_density_membrane	51	0	0	1	1
GO:0099078_BORC_complex	8	0	0	1	1
GO:0099092_postsynaptic_density,_intracellular_component	17	0	0	1	1
GO:0099738_cell_cortex_region	11	0	0	1	1
GO:1902494_catalytic_complex	12	0	0	1	1
GO:1902711_GABA-A_receptor_complex	19	0	0	1	1
GO:1903561_extracellular_vesicle	172	0	0	1	1
GO:1904724_tertiary_granule_lumen	55	0	0	1	1
GO:1990124_messenger_ribonucleoprotein_complex	10	0	0	1	1
GO:1990246_uniplex_complex	6	0	0	1	1
GO:1990454_L-type_voltage-gated_calcium_channel_complex	12	0	0	1	1
GO:1990907_beta-catenin-TCF_complex	10	0	0	1	1
GO:1990909_Wnt_signalosome	12	0	0	1	1

## Sheet: MF_24hrs - ORA_Tt24_vs_NIt24-MF
ORA_Tt24_vs_NIt24-MF_all
geneset	NGenes	pctDE	OR	pvalue	FDR	external_gene_name.DE
[truncated: 888 more rows]

## Sheet: BP_40hrs - ORA_Tt40_vs_NIt40-BP
ORA_Tt40_vs_NIt40-BP_all
[truncated: 2,906 more rows]

## Sheet: CC_40hrs - ORA_Tt40_vs_NIt40-CC
ORA_Tt40_vs_NIt40-CC_all
[truncated: 631 more rows]

[truncated: 4 more sheets: MF_40hrs - ORA_Tt40_vs_NIt40-MF, KEGG_8hrs - ORA_Tt8_vs_NIt8-keg, KEGG_24hrs - ORA_Tt24_vs_NIt24-, KEGG_40hrs - ORA_Tt40_vs_NIt40-]
