# Supplementary material for: Early Transcriptional Changes in Rabies Virus-Infected Neurons and Their Impact on Neuronal Functions
Source: Front Microbiol. 2021 Dec 13;12:730892. doi: 10.3389/fmicb.2021.730892 (PMC8713068; doi:10.3389/fmicb.2021.730892)
Supplement: Supplementary file 6 [file Table_5.XLSX]

## Sheet: BP_8hrs - ORA_T4Mt8_vs_NIt8-BP_
ORA_T4Mt8_vs_NIt8-BP_all
geneset	NGenes	pctDE	OR	pvalue	FDR	external_gene_name.DE
GO:0007389_pattern_specification_process	30	6.67	112.04	0.000204747	0.594789	GRHL3;FST
GO:0007165_signal_transduction	1027	0.49	9	0.000607642	0.882601	SPP1;SECTM1;TGFA;GLRA1;HPCAL4
GO:0000038_very_long-chain_fatty_acid_metabolic_process	16	6.25	98.69	0.0112876	0.984465	ACSBG1
GO:0001508_action_potential	18	5.56	87.21	0.01269	0.984465	GLRA1
GO:0001676_long-chain_fatty_acid_metabolic_process	22	4.55	70.49	0.0154892	0.984465	ACSBG1
GO:0001736_establishment_of_planar_polarity	14	7.14	113.98	0.00988325	0.984465	GRHL3
GO:0001816_cytokine_production	27	3.7	57.06	0.0189776	0.984465	S1PR3
GO:0001946_lymphangiogenesis	11	9.09	147.7	0.00777323	0.984465	PDPN
GO:0001964_startle_response	13	7.69	123.45	0.00918039	0.984465	GLRA1
GO:0002087_regulation_of_respiratory_gaseous_exchange_by_nervous_system_process	13	7.69	123.45	0.00918039	0.984465	GLRA1
GO:0002092_positive_regulation_of_receptor_internalization	23	4.35	67.5	0.0161878	0.984465	SFRP4
GO:0003376_sphingosine-1-phosphate_receptor_signaling_pathway	10	10	164.44	0.00706895	0.984465	S1PR3
GO:0006936_muscle_contraction	105	1.9	30.44	0.00248979	0.984465	CRYAB;GLRA1
GO:0007268_chemical_synaptic_transmission	246	0.81	12.79	0.0129494	0.984465	GLRA1;HAP1
GO:0007276_gamete_generation	20	5	78.08	0.0140905	0.984465	FST
GO:0007340_acrosome_reaction	17	5.88	92.55	0.011989	0.984465	GLRA1
GO:0007398_ectoderm_development	13	7.69	123.45	0.00918039	0.984465	GRHL3
GO:0007417_central_nervous_system_development	139	1.44	22.85	0.00431128	0.984465	GRHL3;HPCAL4
GO:0007628_adult_walking_behavior	27	3.7	57.06	0.0189776	0.984465	GLRA1
GO:0008090_retrograde_axonal_transport	11	9.09	147.7	0.00777323	0.984465	HAP1
GO:0008585_female_gonad_development	19	5.26	82.17	0.0133905	0.984465	FST
GO:0010259_multicellular_organism_aging	18	5.56	87.21	0.01269	0.984465	CRYAB
GO:0019222_regulation_of_metabolic_process	20	5	78.08	0.0140905	0.984465	S1PR3
GO:0031214_biomineral_tissue_development	27	3.7	57.06	0.0189776	0.984465	SPP1
GO:0032230_positive_regulation_of_synaptic_transmission,_GABAergic	13	7.69	123.45	0.00918039	0.984465	HAP1
GO:0032926_negative_regulation_of_activin_receptor_signaling_pathway	8	12.5	210.27	0.00565896	0.984465	FST
GO:0033280_response_to_vitamin_D	16	6.25	98.69	0.0112876	0.984465	SPP1
GO:0035338_long-chain_fatty-acyl-CoA_biosynthetic_process	19	5.26	82.17	0.0133905	0.984465	ACSBG1
GO:0035567_non-canonical_Wnt_signaling_pathway	21	4.76	74.15	0.0147901	0.984465	SFRP4
GO:0042759_long-chain_fatty_acid_biosynthetic_process	26	3.85	59.34	0.0182809	0.984465	ACSBG1
GO:0043616_keratinocyte_proliferation	11	9.09	147.7	0.00777323	0.984465	FST
GO:0044319_wound_healing,_spreading_of_cells	15	6.67	105.88	0.0105856	0.984465	PDPN
GO:0045741_positive_regulation_of_epidermal_growth_factor-activated_receptor_activity	13	7.69	123.45	0.00918039	0.984465	TGFA
GO:0045742_positive_regulation_of_epidermal_growth_factor_receptor_signaling_pathway	23	4.35	67.5	0.0161878	0.984465	HAP1
GO:0045780_positive_regulation_of_bone_resorption	19	5.26	82.17	0.0133905	0.984465	SPP1
GO:0046697_decidualization	25	4	61.8	0.0175837	0.984465	SPP1
GO:0047496_vesicle_transport_along_microtubule	17	5.88	92.55	0.011989	0.984465	HAP1
GO:0048011_neurotrophin_TRK_receptor_signaling_pathway	20	5	78.08	0.0140905	0.984465	HAP1
GO:0048535_lymph_node_development	17	5.88	92.55	0.011989	0.984465	PDPN
GO:0048545_response_to_steroid_hormone	15	6.67	105.88	0.0105856	0.984465	SPP1
GO:0050884_neuromuscular_process_controlling_posture	11	9.09	147.7	0.00777323	0.984465	GLRA1
GO:0051272_positive_regulation_of_cellular_component_movement	10	10	164.44	0.00706895	0.984465	PDPN
GO:0051403_stress-activated_MAPK_cascade	27	3.7	57.06	0.0189776	0.984465	CRYAB
GO:0055093_response_to_hyperoxia	15	6.67	105.88	0.0105856	0.984465	PDPN
GO:0060080_inhibitory_postsynaptic_potential	11	9.09	147.7	0.00777323	0.984465	GLRA1
GO:0060349_bone_morphogenesis	27	3.7	57.06	0.0189776	0.984465	SFRP4
GO:0060394_negative_regulation_of_pathway-restricted_SMAD_protein_phosphorylation	12	8.33	134.48	0.00847705	0.984465	LDLRAD4
GO:0061029_eyelid_development_in_camera-type_eye	13	7.69	123.45	0.00918039	0.984465	GRHL3
GO:0061436_establishment_of_skin_barrier	25	4	61.8	0.0175837	0.984465	GRHL3
GO:0071294_cellular_response_to_zinc_ion	24	4.17	64.39	0.016886	0.984465	GLRA1
GO:0071361_cellular_response_to_ethanol	14	7.14	113.98	0.00988325	0.984465	GLRA1
GO:0090103_cochlea_morphogenesis	24	4.17	64.39	0.016886	0.984465	GRHL3
GO:0090179_planar_cell_polarity_pathway_involved_in_neural_tube_closure	12	8.33	134.48	0.00847705	0.984465	GRHL3
GO:1902430_negative_regulation_of_amyloid-beta_formation	14	7.14	113.98	0.00988325	0.984465	HAP1
GO:2000344_positive_regulation_of_acrosome_reaction	12	8.33	134.48	0.00847705	0.984465	GLRA1
GO:2000378_negative_regulation_of_reactive_oxygen_species_metabolic_process	22	4.55	70.49	0.0154892	0.984465	CRYAB
GO:0031069_hair_follicle_morphogenesis	28	3.57	54.96	0.0196739	0.985392	FST
GO:0045840_positive_regulation_of_mitotic_nuclear_division	28	3.57	54.96	0.0196739	0.985392	TGFA
GO:0007498_mesoderm_development	30	3.33	51.19	0.0210651	0.987698	SECTM1
GO:0008089_anterograde_axonal_transport	31	3.23	49.39	0.02176	0.987698	HAP1
GO:0017157_regulation_of_exocytosis	31	3.23	49.39	0.02176	0.987698	HAP1
GO:0043200_response_to_amino_acid	31	3.23	49.39	0.02176	0.987698	GLRA1
GO:0050769_positive_regulation_of_neurogenesis	29	3.45	53	0.0203697	0.987698	HAP1
GO:0071480_cellular_response_to_gamma_radiation	30	3.33	51.19	0.0210651	0.987698	CRYAB
GO:0000002_mitochondrial_genome_maintenance	12	0	0	1	1
GO:0000012_single_strand_break_repair	9	0	0	1	1
GO:0000027_ribosomal_large_subunit_assembly	25	0	0	1	1
GO:0000028_ribosomal_small_subunit_assembly	16	0	0	1	1
GO:0000045_autophagosome_assembly	57	0	0	1	1
GO:0000050_urea_cycle	11	0	0	1	1
GO:0000070_mitotic_sister_chromatid_segregation	35	0	0	1	1
GO:0000076_DNA_replication_checkpoint	10	0	0	1	1
GO:0000077_DNA_damage_checkpoint	32	0	0	1	1
GO:0000079_regulation_of_cyclin-dependent_protein_serine/threonine_kinase_activity	55	0	0	1	1
GO:0000082_G1/S_transition_of_mitotic_cell_cycle	100	0	0	1	1
GO:0000083_regulation_of_transcription_involved_in_G1/S_transition_of_mitotic_cell_cycle	29	0	0	1	1
GO:0000086_G2/M_transition_of_mitotic_cell_cycle	133	0	0	1	1
GO:0000122_negative_regulation_of_transcription_by_RNA_polymerase_II	894	0.11	1.61	0.475291	1	FST
GO:0000132_establishment_of_mitotic_spindle_orientation	30	0	0	1	1
GO:0000165_MAPK_cascade	260	0.38	5.69	0.169155	1	TGFA
GO:0000183_rDNA_heterochromatin_assembly	37	0	0	1	1
GO:0000184_nuclear-transcribed_mRNA_catabolic_process,_nonsense-mediated_decay	117	0	0	1	1
GO:0000185_activation_of_MAPKKK_activity	12	0	0	1	1
GO:0000186_activation_of_MAPKK_activity	42	0	0	1	1
GO:0000187_activation_of_MAPK_activity	123	0.81	12.13	0.0837275	1	TGFA
GO:0000188_inactivation_of_MAPK_activity	25	0	0	1	1
GO:0000209_protein_polyubiquitination	270	0	0	1	1
GO:0000226_microtubule_cytoskeleton_organization	134	0	0	1	1
GO:0000244_spliceosomal_tri-snRNP_complex_assembly	27	0	0	1	1
GO:0000245_spliceosomal_complex_assembly	26	0	0	1	1
GO:0000266_mitochondrial_fission	19	0	0	1	1
GO:0000278_mitotic_cell_cycle	134	0	0	1	1
GO:0000281_mitotic_cytokinesis	52	0	0	1	1
GO:0000288_nuclear-transcribed_mRNA_catabolic_process,_deadenylation-dependent_decay	9	0	0	1	1
GO:0000289_nuclear-transcribed_mRNA_poly(A)_tail_shortening	22	0	0	1	1
GO:0000290_deadenylation-dependent_decapping_of_nuclear-transcribed_mRNA	10	0	0	1	1
GO:0000302_response_to_reactive_oxygen_species	13	0	0	1	1
GO:0000338_protein_deneddylation	10	0	0	1	1
GO:0000353_formation_of_quadruple_SL/U4/U5/U6_snRNP	12	0	0	1	1
GO:0000375_RNA_splicing,_via_transesterification_reactions	25	0	0	1	1
GO:0000380_alternative_mRNA_splicing,_via_spliceosome	18	0	0	1	1
GO:0000381_regulation_of_alternative_mRNA_splicing,_via_spliceosome	76	0	0	1	1
GO:0000387_spliceosomal_snRNP_assembly	28	0	0	1	1
GO:0000395_mRNA_5'-splice_site_recognition	25	0	0	1	1
GO:0000398_mRNA_splicing,_via_spliceosome	245	0	0	1	1
GO:0000413_protein_peptidyl-prolyl_isomerization	43	0	0	1	1
GO:0000422_autophagy_of_mitochondrion	37	0	0	1	1
GO:0000423_mitophagy	8	0	0	1	1
GO:0000460_maturation_of_5.8S_rRNA	13	0	0	1	1
GO:0000462_maturation_of_SSU-rRNA_from_tricistronic_rRNA_transcript_(SSU-rRNA,_5.8S_rRNA,_LSU-rRNA)	27	0	0	1	1
GO:0000463_maturation_of_LSU-rRNA_from_tricistronic_rRNA_transcript_(SSU-rRNA,_5.8S_rRNA,_LSU-rRNA)	14	0	0	1	1
GO:0000470_maturation_of_LSU-rRNA	13	0	0	1	1
GO:0000492_box_C/D_snoRNP_assembly	9	0	0	1	1
GO:0000712_resolution_of_meiotic_recombination_intermediates	18	0	0	1	1
GO:0000715_nucleotide-excision_repair,_DNA_damage_recognition	23	0	0	1	1
GO:0000717_nucleotide-excision_repair,_DNA_duplex_unwinding	22	0	0	1	1
GO:0000722_telomere_maintenance_via_recombination	9	0	0	1	1
GO:0000723_telomere_maintenance	44	0	0	1	1
GO:0000724_double-strand_break_repair_via_homologous_recombination	82	0	0	1	1
GO:0000727_double-strand_break_repair_via_break-induced_replication	12	0	0	1	1
GO:0000729_DNA_double-strand_break_processing	15	0	0	1	1
GO:0000731_DNA_synthesis_involved_in_DNA_repair	12	0	0	1	1
GO:0000737_DNA_catabolic_process,_endonucleolytic	11	0	0	1	1
GO:0000902_cell_morphogenesis	81	1.23	18.53	0.0559141	1	PDPN
GO:0000956_nuclear-transcribed_mRNA_catabolic_process	15	0	0	1	1
GO:0001501_skeletal_system_development	136	0.74	10.96	0.0921779	1	FST
GO:0001502_cartilage_condensation	21	0	0	1	1
GO:0001503_ossification	77	0	0	1	1
GO:0001504_neurotransmitter_uptake	12	0	0	1	1
GO:0001510_RNA_methylation	19	0	0	1	1
GO:0001516_prostaglandin_biosynthetic_process	16	0	0	1	1
GO:0001523_retinoid_metabolic_process	64	0	0	1	1
GO:0001525_angiogenesis	238	0	0	1	1
GO:0001541_ovarian_follicle_development	40	0	0	1	1
GO:0001556_oocyte_maturation	20	0	0	1	1
GO:0001558_regulation_of_cell_growth	66	0	0	1	1
GO:0001561_fatty_acid_alpha-oxidation	9	0	0	1	1
GO:0001568_blood_vessel_development	43	0	0	1	1
GO:0001569_branching_involved_in_blood_vessel_morphogenesis	32	0	0	1	1
GO:0001570_vasculogenesis	62	0	0	1	1
GO:0001574_ganglioside_biosynthetic_process	11	0	0	1	1
GO:0001578_microtubule_bundle_formation	31	0	0	1	1
GO:0001580_detection_of_chemical_stimulus_involved_in_sensory_perception_of_bitter_taste	36	0	0	1	1
GO:0001649_osteoblast_differentiation	106	0.94	14.11	0.0725645	1	SPP1
GO:0001654_eye_development	42	0	0	1	1
GO:0001655_urogenital_system_development	12	0	0	1	1
GO:0001656_metanephros_development	29	0	0	1	1
GO:0001657_ureteric_bud_development	37	0	0	1	1
GO:0001658_branching_involved_in_ureteric_bud_morphogenesis	42	0	0	1	1
GO:0001659_temperature_homeostasis	20	0	0	1	1
GO:0001662_behavioral_fear_response	31	0	0	1	1
GO:0001666_response_to_hypoxia	163	0.61	9.13	0.109493	1	CRYAB
GO:0001675_acrosome_assembly	18	0	0	1	1
GO:0001678_cellular_glucose_homeostasis	22	0	0	1	1
GO:0001682_tRNA_5'-leader_removal	13	0	0	1	1
GO:0001701_in_utero_embryonic_development	202	0	0	1	1
GO:0001702_gastrulation_with_mouth_forming_second	17	0	0	1	1
GO:0001706_endoderm_formation	12	0	0	1	1
GO:0001707_mesoderm_formation	32	0	0	1	1
GO:0001708_cell_fate_specification	34	0	0	1	1
GO:0001709_cell_fate_determination	17	0	0	1	1
GO:0001731_formation_of_translation_preinitiation_complex	10	0	0	1	1
GO:0001732_formation_of_cytoplasmic_translation_initiation_complex	16	0	0	1	1
GO:0001755_neural_crest_cell_migration	46	0	0	1	1
GO:0001756_somitogenesis	44	0	0	1	1
GO:0001764_neuron_migration	110	0	0	1	1
GO:0001771_immunological_synapse_formation	11	0	0	1	1
GO:0001774_microglial_cell_activation	29	0	0	1	1
GO:0001778_plasma_membrane_repair	12	0	0	1	1
GO:0001779_natural_killer_cell_differentiation	12	0	0	1	1
GO:0001782_B_cell_homeostasis	22	0	0	1	1
GO:0001817_regulation_of_cytokine_production	33	0	0	1	1
GO:0001818_negative_regulation_of_cytokine_production	15	0	0	1	1
GO:0001819_positive_regulation_of_cytokine_production	26	0	0	1	1
GO:0001822_kidney_development	95	0	0	1	1
GO:0001823_mesonephros_development	11	0	0	1	1
GO:0001824_blastocyst_development	19	0	0	1	1
GO:0001825_blastocyst_formation	18	0	0	1	1
GO:0001829_trophectodermal_cell_differentiation	13	0	0	1	1
GO:0001833_inner_cell_mass_cell_proliferation	13	0	0	1	1
GO:0001835_blastocyst_hatching	29	0	0	1	1
GO:0001836_release_of_cytochrome_c_from_mitochondria	22	0	0	1	1
GO:0001837_epithelial_to_mesenchymal_transition	42	0	0	1	1
GO:0001843_neural_tube_closure	78	1.28	19.26	0.0538971	1	GRHL3
GO:0001867_complement_activation,_lectin_pathway	10	0	0	1	1
GO:0001881_receptor_recycling	11	0	0	1	1
GO:0001886_endothelial_cell_morphogenesis	14	0	0	1	1
GO:0001889_liver_development	76	0	0	1	1
GO:0001890_placenta_development	37	0	0	1	1
GO:0001892_embryonic_placenta_development	19	0	0	1	1
GO:0001893_maternal_placenta_development	11	0	0	1	1
GO:0001894_tissue_homeostasis	21	0	0	1	1
GO:0001895_retina_homeostasis	37	0	0	1	1
GO:0001916_positive_regulation_of_T_cell_mediated_cytotoxicity	24	0	0	1	1
GO:0001921_positive_regulation_of_receptor_recycling	14	0	0	1	1
GO:0001932_regulation_of_protein_phosphorylation	44	0	0	1	1
GO:0001933_negative_regulation_of_protein_phosphorylation	72	0	0	1	1
GO:0001934_positive_regulation_of_protein_phosphorylation	185	0	0	1	1
GO:0001935_endothelial_cell_proliferation	15	0	0	1	1
GO:0001937_negative_regulation_of_endothelial_cell_proliferation	38	0	0	1	1
GO:0001938_positive_regulation_of_endothelial_cell_proliferation	73	0	0	1	1
GO:0001942_hair_follicle_development	37	0	0	1	1
GO:0001944_vasculature_development	16	0	0	1	1
GO:0001947_heart_looping	63	0	0	1	1
GO:0001952_regulation_of_cell-matrix_adhesion	12	0	0	1	1
GO:0001953_negative_regulation_of_cell-matrix_adhesion	22	0	0	1	1
GO:0001954_positive_regulation_of_cell-matrix_adhesion	27	0	0	1	1
GO:0001958_endochondral_ossification	29	0	0	1	1
GO:0001960_negative_regulation_of_cytokine-mediated_signaling_pathway	13	0	0	1	1
GO:0001961_positive_regulation_of_cytokine-mediated_signaling_pathway	10	0	0	1	1
GO:0001963_synaptic_transmission,_dopaminergic	11	0	0	1	1
GO:0001967_suckling_behavior	13	0	0	1	1
GO:0001974_blood_vessel_remodeling	32	0	0	1	1
GO:0001975_response_to_amphetamine	33	0	0	1	1
GO:0002003_angiotensin_maturation	12	0	0	1	1
GO:0002009_morphogenesis_of_an_epithelium	18	0	0	1	1
GO:0002024_diet_induced_thermogenesis	12	0	0	1	1
GO:0002026_regulation_of_the_force_of_heart_contraction	17	0	0	1	1
GO:0002027_regulation_of_heart_rate	32	0	0	1	1
GO:0002028_regulation_of_sodium_ion_transport	18	0	0	1	1
GO:0002031_G_protein-coupled_receptor_internalization	13	0	0	1	1
GO:0002040_sprouting_angiogenesis	31	0	0	1	1
GO:0002042_cell_migration_involved_in_sprouting_angiogenesis	21	0	0	1	1
GO:0002052_positive_regulation_of_neuroblast_proliferation	23	0	0	1	1
GO:0002053_positive_regulation_of_mesenchymal_cell_proliferation	23	0	0	1	1
GO:0002062_chondrocyte_differentiation	38	0	0	1	1
GO:0002063_chondrocyte_development	17	0	0	1	1
GO:0002064_epithelial_cell_development	12	0	0	1	1
GO:0002076_osteoblast_development	19	0	0	1	1
GO:0002082_regulation_of_oxidative_phosphorylation	11	0	0	1	1
GO:0002084_protein_depalmitoylation	9	0	0	1	1
GO:0002088_lens_development_in_camera-type_eye	41	2.44	37.09	0.0286831	1	CRYAB
GO:0002089_lens_morphogenesis_in_camera-type_eye	12	0	0	1	1
GO:0002091_negative_regulation_of_receptor_internalization	13	0	0	1	1
GO:0002098_tRNA_wobble_uridine_modification	15	0	0	1	1
GO:0002181_cytoplasmic_translation	41	0	0	1	1
GO:0002218_activation_of_innate_immune_response	26	0	0	1	1
GO:0002223_stimulatory_C-type_lectin_receptor_signaling_pathway	112	0	0	1	1
GO:0002224_toll-like_receptor_signaling_pathway	44	0	0	1	1
GO:0002227_innate_immune_response_in_mucosa	26	0	0	1	1
GO:0002230_positive_regulation_of_defense_response_to_virus_by_host	29	0	0	1	1
GO:0002244_hematopoietic_progenitor_cell_differentiation	66	1.52	22.82	0.0457883	1	FST
GO:0002250_adaptive_immune_response	173	0	0	1	1
GO:0002281_macrophage_activation_involved_in_immune_response	11	0	0	1	1
GO:0002286_T_cell_activation_involved_in_immune_response	24	0	0	1	1
GO:0002323_natural_killer_cell_activation_involved_in_immune_response	19	0	0	1	1
GO:0002376_immune_system_process	36	0	0	1	1
GO:0002377_immunoglobulin_production	14	0	0	1	1
GO:0002407_dendritic_cell_chemotaxis	17	0	0	1	1
GO:0002430_complement_receptor_mediated_signaling_pathway	12	0	0	1	1
GO:0002437_inflammatory_response_to_antigenic_stimulus	23	0	0	1	1
GO:0002474_antigen_processing_and_presentation_of_peptide_antigen_via_MHC_class_I	27	0	0	1	1
GO:0002479_antigen_processing_and_presentation_of_exogenous_peptide_antigen_via_MHC_class_I,_TAP-dependent	75	0	0	1	1
GO:0002523_leukocyte_migration_involved_in_inflammatory_response	11	0	0	1	1
GO:0002526_acute_inflammatory_response	13	0	0	1	1
GO:0002548_monocyte_chemotaxis	44	0	0	1	1
GO:0002576_platelet_degranulation	124	0	0	1	1
GO:0002675_positive_regulation_of_acute_inflammatory_response	13	0	0	1	1
GO:0002687_positive_regulation_of_leukocyte_migration	11	0	0	1	1
GO:0002690_positive_regulation_of_leukocyte_chemotaxis	13	0	0	1	1
GO:0002755_MyD88-dependent_toll-like_receptor_signaling_pathway	32	0	0	1	1
GO:0002756_MyD88-independent_toll-like_receptor_signaling_pathway	20	0	0	1	1
GO:0002827_positive_regulation_of_T-helper_1_type_immune_response	9	0	0	1	1
GO:0002862_negative_regulation_of_inflammatory_response_to_antigenic_stimulus	13	0	0	1	1
GO:0002931_response_to_ischemia	55	0	0	1	1
GO:0003007_heart_morphogenesis	39	0	0	1	1
GO:0003009_skeletal_muscle_contraction	26	0	0	1	1
GO:0003016_respiratory_system_process	14	0	0	1	1
GO:0003073_regulation_of_systemic_arterial_blood_pressure	12	0	0	1	1
GO:0003085_negative_regulation_of_systemic_arterial_blood_pressure	13	0	0	1	1
GO:0003091_renal_water_homeostasis	34	0	0	1	1
GO:0003094_glomerular_filtration	10	0	0	1	1
GO:0003139_secondary_heart_field_specification	11	0	0	1	1
GO:0003148_outflow_tract_septum_morphogenesis	27	0	0	1	1
GO:0003151_outflow_tract_morphogenesis	49	0	0	1	1
GO:0003180_aortic_valve_morphogenesis	28	0	0	1	1
GO:0003181_atrioventricular_valve_morphogenesis	12	0	0	1	1
GO:0003184_pulmonary_valve_morphogenesis	15	0	0	1	1
GO:0003198_epithelial_to_mesenchymal_transition_involved_in_endocardial_cushion_formation	12	0	0	1	1
GO:0003203_endocardial_cushion_morphogenesis	18	0	0	1	1
GO:0003215_cardiac_right_ventricle_morphogenesis	13	0	0	1	1
GO:0003222_ventricular_trabecula_myocardium_morphogenesis	16	0	0	1	1
GO:0003279_cardiac_septum_development	11	0	0	1	1
GO:0003281_ventricular_septum_development	33	0	0	1	1
GO:0003323_type_B_pancreatic_cell_development	12	0	0	1	1
GO:0003333_amino_acid_transmembrane_transport	32	3.12	47.8	0.0224544	1	PDPN
GO:0003341_cilium_movement	40	0	0	1	1
GO:0003351_epithelial_cilium_movement_involved_in_extracellular_fluid_movement	17	0	0	1	1
GO:0003382_epithelial_cell_morphogenesis	16	0	0	1	1
GO:0003407_neural_retina_development	14	0	0	1	1
GO:0005513_detection_of_calcium_ion	13	0	0	1	1
GO:0005975_carbohydrate_metabolic_process	124	0	0	1	1
GO:0005977_glycogen_metabolic_process	27	0	0	1	1
GO:0005978_glycogen_biosynthetic_process	19	0	0	1	1
GO:0005979_regulation_of_glycogen_biosynthetic_process	12	0	0	1	1
GO:0005980_glycogen_catabolic_process	16	0	0	1	1
GO:0006002_fructose_6-phosphate_metabolic_process	12	0	0	1	1
GO:0006004_fucose_metabolic_process	7	0	0	1	1
GO:0006006_glucose_metabolic_process	55	0	0	1	1
GO:0006024_glycosaminoglycan_biosynthetic_process	38	0	0	1	1
GO:0006027_glycosaminoglycan_catabolic_process	25	0	0	1	1
GO:0006044_N-acetylglucosamine_metabolic_process	14	0	0	1	1
GO:0006048_UDP-N-acetylglucosamine_biosynthetic_process	11	0	0	1	1
GO:0006068_ethanol_catabolic_process	13	0	0	1	1
GO:0006069_ethanol_oxidation	12	0	0	1	1
GO:0006071_glycerol_metabolic_process	13	0	0	1	1
GO:0006082_organic_acid_metabolic_process	20	0	0	1	1
GO:0006090_pyruvate_metabolic_process	23	0	0	1	1
GO:0006091_generation_of_precursor_metabolites_and_energy	48	0	0	1	1
GO:0006094_gluconeogenesis	45	0	0	1	1
GO:0006096_glycolytic_process	33	0	0	1	1
GO:0006098_pentose-phosphate_shunt	12	0	0	1	1
GO:0006099_tricarboxylic_acid_cycle	34	0	0	1	1
GO:0006103_2-oxoglutarate_metabolic_process	16	0	0	1	1
GO:0006108_malate_metabolic_process	8	0	0	1	1
GO:0006110_regulation_of_glycolytic_process	42	0	0	1	1
GO:0006111_regulation_of_gluconeogenesis	14	0	0	1	1
GO:0006112_energy_reserve_metabolic_process	15	0	0	1	1
GO:0006119_oxidative_phosphorylation	17	0	0	1	1
GO:0006120_mitochondrial_electron_transport,_NADH_to_ubiquinone	49	0	0	1	1
GO:0006122_mitochondrial_electron_transport,_ubiquinol_to_cytochrome_c	14	0	0	1	1
GO:0006123_mitochondrial_electron_transport,_cytochrome_c_to_oxygen	20	0	0	1	1
GO:0006139_nucleobase-containing_compound_metabolic_process	31	0	0	1	1
GO:0006163_purine_nucleotide_metabolic_process	12	0	0	1	1
GO:0006164_purine_nucleotide_biosynthetic_process	11	0	0	1	1
GO:0006165_nucleoside_diphosphate_phosphorylation	16	0	0	1	1
GO:0006171_cAMP_biosynthetic_process	10	0	0	1	1
GO:0006182_cGMP_biosynthetic_process	11	0	0	1	1
GO:0006183_GTP_biosynthetic_process	10	0	0	1	1
GO:0006195_purine_nucleotide_catabolic_process	13	0	0	1	1
GO:0006241_CTP_biosynthetic_process	10	0	0	1	1
GO:0006259_DNA_metabolic_process	26	0	0	1	1
GO:0006260_DNA_replication	130	0	0	1	1
GO:0006261_DNA-dependent_DNA_replication	22	0	0	1	1
GO:0006264_mitochondrial_DNA_replication	9	0	0	1	1
GO:0006265_DNA_topological_change	9	0	0	1	1
GO:0006268_DNA_unwinding_involved_in_DNA_replication	16	0	0	1	1
GO:0006270_DNA_replication_initiation	30	0	0	1	1
GO:0006271_DNA_strand_elongation_involved_in_DNA_replication	13	0	0	1	1
GO:0006275_regulation_of_DNA_replication	22	0	0	1	1
GO:0006281_DNA_repair	223	0	0	1	1
GO:0006283_transcription-coupled_nucleotide-excision_repair	73	0	0	1	1
GO:0006284_base-excision_repair	30	0	0	1	1
GO:0006289_nucleotide-excision_repair	39	0	0	1	1
GO:0006293_nucleotide-excision_repair,_preincision_complex_stabilization	21	0	0	1	1
GO:0006294_nucleotide-excision_repair,_preincision_complex_assembly	29	0	0	1	1
GO:0006295_nucleotide-excision_repair,_DNA_incision,_3'-to_lesion	21	0	0	1	1
GO:0006296_nucleotide-excision_repair,_DNA_incision,_5'-to_lesion	37	0	0	1	1
GO:0006297_nucleotide-excision_repair,_DNA_gap_filling	23	0	0	1	1
GO:0006298_mismatch_repair	28	0	0	1	1
GO:0006301_postreplication_repair	10	0	0	1	1
GO:0006302_double-strand_break_repair	61	0	0	1	1
GO:0006303_double-strand_break_repair_via_nonhomologous_end_joining	66	0	0	1	1
GO:0006306_DNA_methylation	23	0	0	1	1
GO:0006307_DNA_dealkylation_involved_in_DNA_repair	10	0	0	1	1
GO:0006309_apoptotic_DNA_fragmentation	16	0	0	1	1
GO:0006310_DNA_recombination	60	0	0	1	1
GO:0006325_chromatin_organization	153	0	0	1	1
GO:0006334_nucleosome_assembly	110	0	0	1	1
GO:0006335_DNA_replication-dependent_nucleosome_assembly	32	0	0	1	1
GO:0006336_DNA_replication-independent_nucleosome_assembly	26	0	0	1	1
GO:0006337_nucleosome_disassembly	18	0	0	1	1
GO:0006338_chromatin_remodeling	99	0	0	1	1
GO:0006342_chromatin_silencing	47	0	0	1	1
GO:0006349_regulation_of_gene_expression_by_genetic_imprinting	16	0	0	1	1
GO:0006351_transcription,_DNA-templated	88	0	0	1	1
GO:0006352_DNA-templated_transcription,_initiation	31	0	0	1	1
GO:0006355_regulation_of_transcription,_DNA-templated	757	0	0	1	1
GO:0006357_regulation_of_transcription_by_RNA_polymerase_II	1291	0.15	2.33	0.232269	1	GRHL3;TGFA
GO:0006361_transcription_initiation_from_RNA_polymerase_I_promoter	33	0	0	1	1
GO:0006362_transcription_elongation_from_RNA_polymerase_I_promoter	29	0	0	1	1
GO:0006363_termination_of_RNA_polymerase_I_transcription	30	0	0	1	1
GO:0006364_rRNA_processing	143	0	0	1	1
GO:0006366_transcription_by_RNA_polymerase_II	188	0	0	1	1
GO:0006367_transcription_initiation_from_RNA_polymerase_II_promoter	160	0	0	1	1
GO:0006368_transcription_elongation_from_RNA_polymerase_II_promoter	74	0	0	1	1
GO:0006369_termination_of_RNA_polymerase_II_transcription	34	0	0	1	1
GO:0006370_7-methylguanosine_mRNA_capping	33	0	0	1	1
GO:0006376_mRNA_splice_site_selection	21	0	0	1	1
GO:0006378_mRNA_polyadenylation	30	0	0	1	1
GO:0006382_adenosine_to_inosine_editing	7	0	0	1	1
GO:0006383_transcription_by_RNA_polymerase_III	23	0	0	1	1
GO:0006388_tRNA_splicing,_via_endonucleolytic_cleavage_and_ligation	15	0	0	1	1
GO:0006390_mitochondrial_transcription	10	0	0	1	1
GO:0006396_RNA_processing	491	0	0	1	1
GO:0006397_mRNA_processing	159	0	0	1	1
GO:0006400_tRNA_modification	32	0	0	1	1
GO:0006401_RNA_catabolic_process	22	0	0	1	1
GO:0006402_mRNA_catabolic_process	28	0	0	1	1
GO:0006405_RNA_export_from_nucleus	56	0	0	1	1
GO:0006406_mRNA_export_from_nucleus	101	0	0	1	1
GO:0006409_tRNA_export_from_nucleus	34	0	0	1	1
GO:0006412_translation	176	0	0	1	1
GO:0006413_translational_initiation	130	0	0	1	1
GO:0006414_translational_elongation	20	0	0	1	1
GO:0006417_regulation_of_translation	61	0	0	1	1
GO:0006418_tRNA_aminoacylation_for_protein_translation	38	0	0	1	1
GO:0006446_regulation_of_translational_initiation	28	0	0	1	1
GO:0006457_protein_folding	163	0.61	9.13	0.109493	1	CRYAB
GO:0006464_cellular_protein_modification_process	81	0	0	1	1
GO:0006465_signal_peptide_processing	11	0	0	1	1
GO:0006468_protein_phosphorylation	439	0	0	1	1
GO:0006469_negative_regulation_of_protein_kinase_activity	76	0	0	1	1
GO:0006470_protein_dephosphorylation	148	0	0	1	1
GO:0006471_protein_ADP-ribosylation	23	0	0	1	1
GO:0006473_protein_acetylation	15	0	0	1	1
GO:0006474_N-terminal_protein_amino_acid_acetylation	9	0	0	1	1
GO:0006476_protein_deacetylation	14	0	0	1	1
GO:0006479_protein_methylation	28	0	0	1	1
GO:0006486_protein_glycosylation	89	0	0	1	1
GO:0006487_protein_N-linked_glycosylation	45	0	0	1	1
GO:0006488_dolichol-linked_oligosaccharide_biosynthetic_process	15	0	0	1	1
GO:0006491_N-glycan_processing	17	0	0	1	1
GO:0006493_protein_O-linked_glycosylation	36	0	0	1	1
GO:0006497_protein_lipidation	11	0	0	1	1
GO:0006506_GPI_anchor_biosynthetic_process	25	0	0	1	1
GO:0006508_proteolysis	428	0	0	1	1
GO:0006509_membrane_protein_ectodomain_proteolysis	20	0	0	1	1
GO:0006511_ubiquitin-dependent_protein_catabolic_process	293	0	0	1	1
GO:0006513_protein_monoubiquitination	34	0	0	1	1
GO:0006515_protein_quality_control_for_misfolded_or_incompletely_synthesized_proteins	13	0	0	1	1
GO:0006516_glycoprotein_catabolic_process	12	0	0	1	1
GO:0006517_protein_deglycosylation	8	0	0	1	1
GO:0006518_peptide_metabolic_process	13	0	0	1	1
GO:0006520_cellular_amino_acid_metabolic_process	19	0	0	1	1
GO:0006521_regulation_of_cellular_amino_acid_metabolic_process	51	0	0	1	1
GO:0006536_glutamate_metabolic_process	14	0	0	1	1
GO:0006541_glutamine_metabolic_process	18	0	0	1	1
GO:0006548_histidine_catabolic_process	8	0	0	1	1
GO:0006552_leucine_catabolic_process	6	0	0	1	1
GO:0006554_lysine_catabolic_process	12	0	0	1	1
GO:0006556_S-adenosylmethionine_biosynthetic_process	4	0	0	1	1
GO:0006559_L-phenylalanine_catabolic_process	11	0	0	1	1
GO:0006564_L-serine_biosynthetic_process	7	0	0	1	1
GO:0006590_thyroid_hormone_generation	17	0	0	1	1
GO:0006605_protein_targeting	43	2.33	35.33	0.0300621	1	HAP1
GO:0006606_protein_import_into_nucleus	78	0	0	1	1
GO:0006607_NLS-bearing_protein_import_into_nucleus	20	0	0	1	1
GO:0006611_protein_export_from_nucleus	28	0	0	1	1
GO:0006612_protein_targeting_to_membrane	53	0	0	1	1
GO:0006614_SRP-dependent_cotranslational_protein_targeting_to_membrane	89	0	0	1	1
GO:0006617_SRP-dependent_cotranslational_protein_targeting_to_membrane,_signal_sequence_recognition	10	0	0	1	1
GO:0006622_protein_targeting_to_lysosome	18	0	0	1	1
GO:0006623_protein_targeting_to_vacuole	16	0	0	1	1
GO:0006625_protein_targeting_to_peroxisome	65	0	0	1	1
GO:0006626_protein_targeting_to_mitochondrion	30	0	0	1	1
GO:0006629_lipid_metabolic_process	141	0	0	1	1
GO:0006631_fatty_acid_metabolic_process	65	0	0	1	1
GO:0006633_fatty_acid_biosynthetic_process	43	0	0	1	1
GO:0006635_fatty_acid_beta-oxidation	44	0	0	1	1
GO:0006636_unsaturated_fatty_acid_biosynthetic_process	14	0	0	1	1
GO:0006637_acyl-CoA_metabolic_process	31	0	0	1	1
GO:0006641_triglyceride_metabolic_process	32	0	0	1	1
GO:0006644_phospholipid_metabolic_process	57	0	0	1	1
GO:0006646_phosphatidylethanolamine_biosynthetic_process	15	0	0	1	1
GO:0006654_phosphatidic_acid_biosynthetic_process	48	0	0	1	1
GO:0006656_phosphatidylcholine_biosynthetic_process	34	0	0	1	1
GO:0006661_phosphatidylinositol_biosynthetic_process	77	0	0	1	1
GO:0006665_sphingolipid_metabolic_process	25	0	0	1	1
GO:0006672_ceramide_metabolic_process	21	0	0	1	1
GO:0006687_glycosphingolipid_metabolic_process	40	0	0	1	1
GO:0006690_icosanoid_metabolic_process	9	0	0	1	1
GO:0006691_leukotriene_metabolic_process	17	0	0	1	1
GO:0006693_prostaglandin_metabolic_process	20	0	0	1	1
GO:0006694_steroid_biosynthetic_process	26	0	0	1	1
GO:0006695_cholesterol_biosynthetic_process	40	0	0	1	1
GO:0006699_bile_acid_biosynthetic_process	27	0	0	1	1
GO:0006700_C21-steroid_hormone_biosynthetic_process	12	0	0	1	1
GO:0006703_estrogen_biosynthetic_process	13	0	0	1	1
GO:0006704_glucocorticoid_biosynthetic_process	10	0	0	1	1
GO:0006707_cholesterol_catabolic_process	11	0	0	1	1
GO:0006729_tetrahydrobiopterin_biosynthetic_process	7	0	0	1	1
GO:0006730_one-carbon_metabolic_process	36	0	0	1	1
GO:0006744_ubiquinone_biosynthetic_process	16	0	0	1	1
GO:0006749_glutathione_metabolic_process	33	0	0	1	1
GO:0006750_glutathione_biosynthetic_process	15	0	0	1	1
GO:0006751_glutathione_catabolic_process	11	0	0	1	1
GO:0006754_ATP_biosynthetic_process	28	0	0	1	1
GO:0006768_biotin_metabolic_process	9	0	0	1	1
GO:0006783_heme_biosynthetic_process	22	0	0	1	1
GO:0006790_sulfur_compound_metabolic_process	15	0	0	1	1
GO:0006796_phosphate-containing_compound_metabolic_process	17	0	0	1	1
GO:0006801_superoxide_metabolic_process	20	0	0	1	1
GO:0006805_xenobiotic_metabolic_process	94	0	0	1	1
GO:0006809_nitric_oxide_biosynthetic_process	13	0	0	1	1
GO:0006810_transport	36	0	0	1	1
GO:0006811_ion_transport	98	1.02	15.27	0.0672669	1	GLRA1
GO:0006812_cation_transport	29	0	0	1	1
GO:0006813_potassium_ion_transport	68	0	0	1	1
GO:0006814_sodium_ion_transport	77	0	0	1	1
GO:0006816_calcium_ion_transport	76	0	0	1	1
GO:0006820_anion_transport	18	0	0	1	1
GO:0006821_chloride_transport	37	2.7	41.2	0.0259194	1	GLRA1
GO:0006825_copper_ion_transport	15	0	0	1	1
GO:0006826_iron_ion_transport	19	0	0	1	1
GO:0006828_manganese_ion_transport	11	0	0	1	1
GO:0006833_water_transport	16	0	0	1	1
GO:0006836_neurotransmitter_transport	28	0	0	1	1
GO:0006839_mitochondrial_transport	18	0	0	1	1
GO:0006851_mitochondrial_calcium_ion_transmembrane_transport	23	0	0	1	1
GO:0006853_carnitine_shuttle	11	0	0	1	1
GO:0006865_amino_acid_transport	40	0	0	1	1
GO:0006868_glutamine_transport	8	0	0	1	1
GO:0006869_lipid_transport	60	0	0	1	1
GO:0006874_cellular_calcium_ion_homeostasis	98	0	0	1	1
GO:0006878_cellular_copper_ion_homeostasis	14	0	0	1	1
GO:0006879_cellular_iron_ion_homeostasis	61	0	0	1	1
GO:0006882_cellular_zinc_ion_homeostasis	30	0	0	1	1
GO:0006883_cellular_sodium_ion_homeostasis	18	0	0	1	1
GO:0006884_cell_volume_homeostasis	19	0	0	1	1
GO:0006885_regulation_of_pH	12	0	0	1	1
GO:0006886_intracellular_protein_transport	277	0	0	1	1
GO:0006887_exocytosis	94	1.06	15.93	0.0646074	1	HAP1
GO:0006888_endoplasmic_reticulum_to_Golgi_vesicle-mediated_transport	183	0.55	8.12	0.122117	1	TGFA
GO:0006890_retrograde_vesicle-mediated_transport,_Golgi_to_endoplasmic_reticulum	85	0	0	1	1
GO:0006891_intra-Golgi_vesicle-mediated_transport	32	0	0	1	1
GO:0006892_post-Golgi_vesicle-mediated_transport	19	0	0	1	1
GO:0006893_Golgi_to_plasma_membrane_transport	23	0	0	1	1
GO:0006895_Golgi_to_endosome_transport	15	0	0	1	1
GO:0006897_endocytosis	185	0	0	1	1
GO:0006898_receptor-mediated_endocytosis	100	0	0	1	1
GO:0006900_vesicle_budding_from_membrane	15	0	0	1	1
GO:0006904_vesicle_docking_involved_in_exocytosis	33	0	0	1	1
GO:0006906_vesicle_fusion	37	0	0	1	1
GO:0006909_phagocytosis	60	0	0	1	1
GO:0006910_phagocytosis,_recognition	9	0	0	1	1
GO:0006911_phagocytosis,_engulfment	26	0	0	1	1
GO:0006913_nucleocytoplasmic_transport	20	0	0	1	1
GO:0006914_autophagy	126	0.79	11.84	0.0856842	1	HAP1
GO:0006915_apoptotic_process	542	0	0	1	1
GO:0006919_activation_of_cysteine-type_endopeptidase_activity_involved_in_apoptotic_process	84	0	0	1	1
GO:0006935_chemotaxis	124	0	0	1	1
GO:0006937_regulation_of_muscle_contraction	14	0	0	1	1
GO:0006939_smooth_muscle_contraction	16	0	0	1	1
GO:0006940_regulation_of_smooth_muscle_contraction	14	0	0	1	1
GO:0006941_striated_muscle_contraction	14	0	0	1	1
GO:0006952_defense_response	73	0	0	1	1
GO:0006953_acute-phase_response	37	0	0	1	1
GO:0006954_inflammatory_response	383	0.52	8.15	0.029679	1	SPP1;S1PR3
GO:0006955_immune_response	299	0.33	4.94	0.192058	1	SECTM1
GO:0006956_complement_activation	28	0	0	1	1
GO:0006957_complement_activation,_alternative_pathway	13	0	0	1	1
GO:0006958_complement_activation,_classical_pathway	34	0	0	1	1
GO:0006959_humoral_immune_response	59	0	0	1	1
GO:0006968_cellular_defense_response	52	0	0	1	1
GO:0006970_response_to_osmotic_stress	19	0	0	1	1
GO:0006974_cellular_response_to_DNA_damage_stimulus	239	0	0	1	1
GO:0006977_DNA_damage_response,_signal_transduction_by_p53_class_mediator_resulting_in_cell_cycle_arrest	56	0	0	1	1
GO:0006978_DNA_damage_response,_signal_transduction_by_p53_class_mediator_resulting_in_transcription_of_p21_class_mediator	14	0	0	1	1
GO:0006979_response_to_oxidative_stress	103	0	0	1	1
GO:0006983_ER_overload_response	11	0	0	1	1
GO:0006986_response_to_unfolded_protein	53	0	0	1	1
GO:0006995_cellular_response_to_nitrogen_starvation	12	0	0	1	1
GO:0006996_organelle_organization	11	0	0	1	1
GO:0006997_nucleus_organization	23	0	0	1	1
GO:0006998_nuclear_envelope_organization	18	0	0	1	1
GO:0007004_telomere_maintenance_via_telomerase	20	0	0	1	1
GO:0007005_mitochondrion_organization	90	0	0	1	1
GO:0007007_inner_mitochondrial_membrane_organization	18	0	0	1	1
GO:0007009_plasma_membrane_organization	23	0	0	1	1
GO:0007010_cytoskeleton_organization	140	0	0	1	1
GO:0007015_actin_filament_organization	119	0	0	1	1
GO:0007017_microtubule-based_process	33	0	0	1	1
GO:0007018_microtubule-based_movement	79	0	0	1	1
GO:0007019_microtubule_depolymerization	15	0	0	1	1
GO:0007020_microtubule_nucleation	18	0	0	1	1
GO:0007026_negative_regulation_of_microtubule_depolymerization	27	0	0	1	1
GO:0007029_endoplasmic_reticulum_organization	34	0	0	1	1
GO:0007030_Golgi_organization	118	0	0	1	1
GO:0007031_peroxisome_organization	20	0	0	1	1
GO:0007032_endosome_organization	38	0	0	1	1
GO:0007035_vacuolar_acidification	14	0	0	1	1
GO:0007040_lysosome_organization	42	0	0	1	1
GO:0007041_lysosomal_transport	20	0	0	1	1
GO:0007043_cell-cell_junction_assembly	37	0	0	1	1
GO:0007049_cell_cycle	245	0	0	1	1
GO:0007050_cell_cycle_arrest	129	0	0	1	1
GO:0007051_spindle_organization	16	0	0	1	1
GO:0007052_mitotic_spindle_organization	50	0	0	1	1
GO:0007059_chromosome_segregation	73	0	0	1	1
GO:0007062_sister_chromatid_cohesion	23	0	0	1	1
GO:0007064_mitotic_sister_chromatid_cohesion	13	0	0	1	1
GO:0007076_mitotic_chromosome_condensation	16	0	0	1	1
GO:0007077_mitotic_nuclear_envelope_disassembly	12	0	0	1	1
GO:0007080_mitotic_metaphase_plate_congression	37	0	0	1	1
GO:0007084_mitotic_nuclear_envelope_reassembly	10	0	0	1	1
GO:0007088_regulation_of_mitotic_nuclear_division	23	0	0	1	1
GO:0007093_mitotic_cell_cycle_checkpoint	31	0	0	1	1
GO:0007094_mitotic_spindle_assembly_checkpoint	22	0	0	1	1
GO:0007095_mitotic_G2_DNA_damage_checkpoint	21	0	0	1	1
GO:0007096_regulation_of_exit_from_mitosis	12	0	0	1	1
GO:0007097_nuclear_migration	15	0	0	1	1
GO:0007098_centrosome_cycle	40	0	0	1	1
GO:0007099_centriole_replication	17	0	0	1	1
GO:0007129_homologous_chromosome_pairing_at_meiosis	26	0	0	1	1
GO:0007130_synaptonemal_complex_assembly	21	0	0	1	1
GO:0007131_reciprocal_meiotic_recombination	30	0	0	1	1
GO:0007140_male_meiotic_nuclear_division	24	0	0	1	1
GO:0007141_male_meiosis_I	24	0	0	1	1
GO:0007154_cell_communication	18	0	0	1	1
GO:0007155_cell_adhesion	483	0.21	3.03	0.292279	1	SPP1
GO:0007156_homophilic_cell_adhesion_via_plasma_membrane_adhesion_molecules	167	0	0	1	1
GO:0007157_heterophilic_cell-cell_adhesion_via_plasma_membrane_cell_adhesion_molecules	47	0	0	1	1
GO:0007158_neuron_cell-cell_adhesion	17	0	0	1	1
GO:0007159_leukocyte_cell-cell_adhesion	29	0	0	1	1
GO:0007160_cell-matrix_adhesion	93	0	0	1	1
GO:0007162_negative_regulation_of_cell_adhesion	50	0	0	1	1
GO:0007163_establishment_or_maintenance_of_cell_polarity	49	0	0	1	1
GO:0007166_cell_surface_receptor_signaling_pathway	232	0	0	1	1
GO:0007168_receptor_guanylyl_cyclase_signaling_pathway	10	0	0	1	1
GO:0007169_transmembrane_receptor_protein_tyrosine_kinase_signaling_pathway	122	0	0	1	1
GO:0007171_activation_of_transmembrane_receptor_protein_tyrosine_kinase_activity	13	0	0	1	1
GO:0007173_epidermal_growth_factor_receptor_signaling_pathway	49	2.04	30.91	0.0341881	1	TGFA
GO:0007175_negative_regulation_of_epidermal_growth_factor-activated_receptor_activity	14	0	0	1	1
GO:0007179_transforming_growth_factor_beta_receptor_signaling_pathway	101	0	0	1	1
GO:0007186_G_protein-coupled_receptor_signaling_pathway	1097	0.09	1.3	0.548171	1	S1PR3
GO:0007187_G_protein-coupled_receptor_signaling_pathway,_coupled_to_cyclic_nucleotide_second_messenger	63	0	0	1	1
GO:0007188_adenylate_cyclase-modulating_G_protein-coupled_receptor_signaling_pathway	50	0	0	1	1
GO:0007189_adenylate_cyclase-activating_G_protein-coupled_receptor_signaling_pathway	113	0.88	13.22	0.0771766	1	S1PR3
GO:0007190_activation_of_adenylate_cyclase_activity	39	0	0	1	1
GO:0007191_adenylate_cyclase-activating_dopamine_receptor_signaling_pathway	11	0	0	1	1
GO:0007193_adenylate_cyclase-inhibiting_G_protein-coupled_receptor_signaling_pathway	60	1.67	25.16	0.0417093	1	S1PR3
GO:0007194_negative_regulation_of_adenylate_cyclase_activity	20	0	0	1	1
GO:0007200_phospholipase_C-activating_G_protein-coupled_receptor_signaling_pathway	60	0	0	1	1
GO:0007202_activation_of_phospholipase_C_activity	34	0	0	1	1
GO:0007204_positive_regulation_of_cytosolic_calcium_ion_concentration	151	0.66	9.86	0.101837	1	S1PR3
GO:0007205_protein_kinase_C-activating_G_protein-coupled_receptor_signaling_pathway	28	0	0	1	1
GO:0007212_dopamine_receptor_signaling_pathway	18	0	0	1	1
GO:0007213_G_protein-coupled_acetylcholine_receptor_signaling_pathway	15	0	0	1	1
GO:0007214_gamma-aminobutyric_acid_signaling_pathway	27	0	0	1	1
GO:0007215_glutamate_receptor_signaling_pathway	16	0	0	1	1
GO:0007216_G_protein-coupled_glutamate_receptor_signaling_pathway	15	0	0	1	1
GO:0007218_neuropeptide_signaling_pathway	105	0.95	14.25	0.0719039	1	GLRA1
GO:0007219_Notch_signaling_pathway	110	0.91	13.59	0.0752026	1	S1PR3
GO:0007220_Notch_receptor_processing	9	0	0	1	1
GO:0007221_positive_regulation_of_transcription_of_Notch_receptor_target	18	0	0	1	1
GO:0007223_Wnt_signaling_pathway,_calcium_modulating_pathway	37	0	0	1	1
GO:0007224_smoothened_signaling_pathway	64	0	0	1	1
GO:0007229_integrin-mediated_signaling_pathway	95	0	0	1	1
GO:0007249_I-kappaB_kinase/NF-kappaB_signaling	66	0	0	1	1
GO:0007250_activation_of_NF-kappaB-inducing_kinase_activity	17	0	0	1	1
GO:0007252_I-kappaB_phosphorylation	12	0	0	1	1
GO:0007254_JNK_cascade	48	0	0	1	1
GO:0007256_activation_of_JNKK_activity	11	0	0	1	1
GO:0007257_activation_of_JUN_kinase_activity	40	0	0	1	1
GO:0007259_receptor_signaling_pathway_via_JAK-STAT	31	0	0	1	1
GO:0007260_tyrosine_phosphorylation_of_STAT_protein	9	0	0	1	1
GO:0007263_nitric_oxide_mediated_signal_transduction	19	0	0	1	1
GO:0007264_small_GTPase_mediated_signal_transduction	94	0	0	1	1
GO:0007265_Ras_protein_signal_transduction	73	0	0	1	1
GO:0007266_Rho_protein_signal_transduction	57	1.75	26.5	0.0396636	1	PDPN
GO:0007267_cell-cell_signaling	228	0	0	1	1
GO:0007269_neurotransmitter_secretion	51	0	0	1	1
GO:0007271_synaptic_transmission,_cholinergic	25	0	0	1	1
GO:0007274_neuromuscular_synaptic_transmission	19	0	0	1	1
GO:0007275_multicellular_organism_development	469	0.21	3.12	0.285088	1	FST
GO:0007281_germ_cell_development	35	0	0	1	1
GO:0007283_spermatogenesis	414	0	0	1	1
GO:0007286_spermatid_development	84	0	0	1	1
GO:0007288_sperm_axoneme_assembly	16	0	0	1	1
GO:0007292_female_gamete_generation	19	0	0	1	1
GO:0007338_single_fertilization	65	0	0	1	1
GO:0007339_binding_of_sperm_to_zona_pellucida	41	0	0	1	1
GO:0007342_fusion_of_sperm_to_egg_plasma_membrane_involved_in_single_fertilization	21	0	0	1	1
GO:0007346_regulation_of_mitotic_cell_cycle	44	0	0	1	1
GO:0007368_determination_of_left/right_symmetry	59	0	0	1	1
GO:0007369_gastrulation	23	0	0	1	1
GO:0007399_nervous_system_development	303	0	0	1	1
GO:0007405_neuroblast_proliferation	16	0	0	1	1
GO:0007409_axonogenesis	78	0	0	1	1
GO:0007411_axon_guidance	223	0	0	1	1
GO:0007413_axonal_fasciculation	20	0	0	1	1
GO:0007416_synapse_assembly	63	0	0	1	1
GO:0007420_brain_development	230	0.43	6.44	0.15112	1	HAP1
GO:0007422_peripheral_nervous_system_development	26	0	0	1	1
GO:0007492_endoderm_development	20	0	0	1	1
GO:0007507_heart_development	190	0	0	1	1
GO:0007512_adult_heart_development	14	0	0	1	1
GO:0007517_muscle_organ_development	90	1.11	16.65	0.0619406	1	CRYAB
GO:0007519_skeletal_muscle_tissue_development	50	0	0	1	1
GO:0007520_myoblast_fusion	22	0	0	1	1
GO:0007528_neuromuscular_junction_development	32	0	0	1	1
GO:0007548_sex_differentiation	20	0	0	1	1
GO:0007565_female_pregnancy	85	0	0	1	1
GO:0007566_embryo_implantation	42	2.38	36.19	0.0293728	1	SPP1
GO:0007568_aging	165	0	0	1	1
GO:0007569_cell_aging	25	0	0	1	1
GO:0007584_response_to_nutrient	68	0	0	1	1
GO:0007585_respiratory_gaseous_exchange_by_respiratory_system	30	0	0	1	1
GO:0007586_digestion	30	0	0	1	1
GO:0007588_excretion	32	0	0	1	1
GO:0007595_lactation	46	0	0	1	1
GO:0007596_blood_coagulation	186	0	0	1	1
GO:0007597_blood_coagulation,_intrinsic_pathway	17	0	0	1	1
GO:0007600_sensory_perception	11	0	0	1	1
GO:0007601_visual_perception	206	0.49	7.2	0.136425	1	GLRA1
GO:0007602_phototransduction	27	0	0	1	1
GO:0007605_sensory_perception_of_sound	144	0	0	1	1
GO:0007608_sensory_perception_of_smell	99	0	0	1	1
GO:0007611_learning_or_memory	61	0	0	1	1
GO:0007612_learning	61	0	0	1	1
GO:0007613_memory	83	0	0	1	1
GO:0007614_short-term_memory	11	0	0	1	1
GO:0007616_long-term_memory	34	0	0	1	1
GO:0007623_circadian_rhythm	74	0	0	1	1
GO:0007625_grooming_behavior	14	0	0	1	1
GO:0007626_locomotory_behavior	86	0	0	1	1
GO:0007631_feeding_behavior	28	0	0	1	1
GO:0008015_blood_circulation	34	0	0	1	1
GO:0008016_regulation_of_heart_contraction	35	0	0	1	1
GO:0008033_tRNA_processing	19	0	0	1	1
GO:0008037_cell_recognition	9	0	0	1	1
GO:0008045_motor_neuron_axon_guidance	26	0	0	1	1
GO:0008053_mitochondrial_fusion	15	0	0	1	1
GO:0008104_protein_localization	77	1.3	19.5	0.0532239	1	HAP1
GO:0008150_biological_process	592	0	0	1	1
GO:0008154_actin_polymerization_or_depolymerization	22	0	0	1	1
GO:0008156_negative_regulation_of_DNA_replication	18	0	0	1	1
GO:0008202_steroid_metabolic_process	43	0	0	1	1
GO:0008203_cholesterol_metabolic_process	75	0	0	1	1
GO:0008206_bile_acid_metabolic_process	14	0	0	1	1
GO:0008209_androgen_metabolic_process	16	0	0	1	1
GO:0008210_estrogen_metabolic_process	20	0	0	1	1
GO:0008217_regulation_of_blood_pressure	66	0	0	1	1
GO:0008219_cell_death	36	0	0	1	1
GO:0008272_sulfate_transport	13	0	0	1	1
GO:0008277_regulation_of_G_protein-coupled_receptor_signaling_pathway	43	0	0	1	1
GO:0008283_cell_population_proliferation	140	0	0	1	1
GO:0008284_positive_regulation_of_cell_population_proliferation	512	0.39	6.06	0.0502879	1	S1PR3;TGFA
GO:0008285_negative_regulation_of_cell_population_proliferation	433	0.46	7.19	0.0371597	1	PDPN;SFRP4
GO:0008286_insulin_receptor_signaling_pathway	84	0	0	1	1
GO:0008299_isoprenoid_biosynthetic_process	9	0	0	1	1
GO:0008306_associative_learning	27	0	0	1	1
GO:0008333_endosome_to_lysosome_transport	46	0	0	1	1
GO:0008334_histone_mRNA_metabolic_process	12	0	0	1	1
GO:0008340_determination_of_adult_lifespan	17	0	0	1	1
GO:0008343_adult_feeding_behavior	12	0	0	1	1
GO:0008344_adult_locomotory_behavior	48	0	0	1	1
GO:0008360_regulation_of_cell_shape	151	0.66	9.86	0.101837	1	PDPN
GO:0008361_regulation_of_cell_size	21	0	0	1	1
GO:0008380_RNA_splicing	160	0	0	1	1
GO:0008406_gonad_development	11	0	0	1	1
GO:0008542_visual_learning	47	0	0	1	1
GO:0008543_fibroblast_growth_factor_receptor_signaling_pathway	80	0	0	1	1
GO:0008544_epidermis_development	80	1.25	18.77	0.0552422	1	GRHL3
GO:0008584_male_gonad_development	95	0	0	1	1
GO:0008589_regulation_of_smoothened_signaling_pathway	21	0	0	1	1
GO:0008593_regulation_of_Notch_signaling_pathway	17	0	0	1	1
GO:0008608_attachment_of_spindle_microtubules_to_kinetochore	10	0	0	1	1
GO:0008610_lipid_biosynthetic_process	14	0	0	1	1
GO:0008611_ether_lipid_biosynthetic_process	6	0	0	1	1
GO:0008625_extrinsic_apoptotic_signaling_pathway_via_death_domain_receptors	33	0	0	1	1
GO:0008630_intrinsic_apoptotic_signaling_pathway_in_response_to_DNA_damage	43	0	0	1	1
GO:0008631_intrinsic_apoptotic_signaling_pathway_in_response_to_oxidative_stress	14	0	0	1	1
GO:0008637_apoptotic_mitochondrial_changes	17	0	0	1	1
GO:0008643_carbohydrate_transport	23	0	0	1	1
GO:0008645_hexose_transmembrane_transport	13	0	0	1	1
GO:0008652_cellular_amino_acid_biosynthetic_process	25	0	0	1	1
GO:0008654_phospholipid_biosynthetic_process	24	0	0	1	1
GO:0009048_dosage_compensation_by_inactivation_of_X_chromosome	12	0	0	1	1
GO:0009060_aerobic_respiration	32	0	0	1	1
GO:0009062_fatty_acid_catabolic_process	12	0	0	1	1
GO:0009083_branched-chain_amino_acid_catabolic_process	20	0	0	1	1
GO:0009100_glycoprotein_metabolic_process	11	0	0	1	1
GO:0009116_nucleoside_metabolic_process	12	0	0	1	1
GO:0009142_nucleoside_triphosphate_biosynthetic_process	9	0	0	1	1
GO:0009165_nucleotide_biosynthetic_process	11	0	0	1	1
GO:0009168_purine_ribonucleoside_monophosphate_biosynthetic_process	13	0	0	1	1
GO:0009235_cobalamin_metabolic_process	21	0	0	1	1
GO:0009267_cellular_response_to_starvation	73	0	0	1	1
GO:0009303_rRNA_transcription	13	0	0	1	1
GO:0009306_protein_secretion	54	0	0	1	1
GO:0009311_oligosaccharide_metabolic_process	21	0	0	1	1
GO:0009312_oligosaccharide_biosynthetic_process	13	0	0	1	1
GO:0009313_oligosaccharide_catabolic_process	11	0	0	1	1
GO:0009314_response_to_radiation	23	0	0	1	1
GO:0009395_phospholipid_catabolic_process	12	0	0	1	1
GO:0009408_response_to_heat	42	0	0	1	1
GO:0009409_response_to_cold	35	0	0	1	1
GO:0009411_response_to_UV	42	0	0	1	1
GO:0009416_response_to_light_stimulus	22	0	0	1	1
GO:0009435_NAD_biosynthetic_process	12	0	0	1	1
GO:0009566_fertilization	39	0	0	1	1
GO:0009584_detection_of_visible_light	14	0	0	1	1
GO:0009611_response_to_wounding	60	0	0	1	1
GO:0009612_response_to_mechanical_stimulus	54	0	0	1	1
GO:0009615_response_to_virus	104	0	0	1	1
GO:0009617_response_to_bacterium	94	0	0	1	1
GO:0009636_response_to_toxic_substance	83	0	0	1	1
GO:0009650_UV_protection	13	0	0	1	1
GO:0009653_anatomical_structure_morphogenesis	131	0.76	11.38	0.0889365	1	S1PR3
GO:0009725_response_to_hormone	42	2.38	36.19	0.0293728	1	SFRP4
GO:0009743_response_to_carbohydrate	13	0	0	1	1
GO:0009749_response_to_glucose	68	0	0	1	1
GO:0009755_hormone-mediated_signaling_pathway	47	0	0	1	1
GO:0009790_embryo_development	17	0	0	1	1
GO:0009791_post-embryonic_development	67	0	0	1	1
GO:0009792_embryo_development_ending_in_birth_or_egg_hatching	21	0	0	1	1
GO:0009880_embryonic_pattern_specification	26	0	0	1	1
GO:0009887_animal_organ_morphogenesis	134	0	0	1	1
GO:0009888_tissue_development	34	0	0	1	1
GO:0009948_anterior/posterior_axis_specification	16	0	0	1	1
GO:0009952_anterior/posterior_pattern_specification	97	0	0	1	1
GO:0009953_dorsal/ventral_pattern_formation	35	0	0	1	1
GO:0009954_proximal/distal_pattern_formation	26	0	0	1	1
GO:0009966_regulation_of_signal_transduction	27	0	0	1	1
GO:0009968_negative_regulation_of_signal_transduction	41	0	0	1	1
GO:0009972_cytidine_deamination	12	0	0	1	1
GO:0010001_glial_cell_differentiation	14	0	0	1	1
GO:0010033_response_to_organic_substance	27	0	0	1	1
GO:0010038_response_to_metal_ion	12	0	0	1	1
GO:0010039_response_to_iron_ion	18	0	0	1	1
GO:0010043_response_to_zinc_ion	31	0	0	1	1
GO:0010165_response_to_X-ray	20	0	0	1	1
GO:0010212_response_to_ionizing_radiation	44	0	0	1	1
GO:0010243_response_to_organonitrogen_compound	16	0	0	1	1
GO:0010248_establishment_or_maintenance_of_transmembrane_electrochemical_gradient	14	0	0	1	1
GO:0010269_response_to_selenium_ion	10	0	0	1	1
GO:0010273_detoxification_of_copper_ion	15	0	0	1	1
GO:0010288_response_to_lead_ion	19	0	0	1	1
GO:0010332_response_to_gamma_radiation	27	0	0	1	1
GO:0010389_regulation_of_G2/M_transition_of_mitotic_cell_cycle	80	0	0	1	1
GO:0010390_histone_monoubiquitination	12	0	0	1	1
GO:0010447_response_to_acidic_pH	14	0	0	1	1
GO:0010457_centriole-centriole_cohesion	11	0	0	1	1
GO:0010458_exit_from_mitosis	11	0	0	1	1
GO:0010459_negative_regulation_of_heart_rate	12	0	0	1	1
GO:0010460_positive_regulation_of_heart_rate	22	0	0	1	1
GO:0010466_negative_regulation_of_peptidase_activity	14	0	0	1	1
GO:0010467_gene_expression	21	0	0	1	1
GO:0010468_regulation_of_gene_expression	227	0	0	1	1
GO:0010469_regulation_of_signaling_receptor_activity	15	0	0	1	1
GO:0010498_proteasomal_protein_catabolic_process	34	0	0	1	1
GO:0010499_proteasomal_ubiquitin-independent_protein_catabolic_process	22	0	0	1	1
GO:0010501_RNA_secondary_structure_unwinding	8	0	0	1	1
GO:0010506_regulation_of_autophagy	69	0	0	1	1
GO:0010507_negative_regulation_of_autophagy	51	0	0	1	1
GO:0010508_positive_regulation_of_autophagy	57	0	0	1	1
GO:0010510_regulation_of_acetyl-CoA_biosynthetic_process_from_pyruvate	8	0	0	1	1
GO:0010524_positive_regulation_of_calcium_ion_transport_into_cytosol	12	0	0	1	1
GO:0010529_negative_regulation_of_transposition	19	0	0	1	1
GO:0010564_regulation_of_cell_cycle_process	11	0	0	1	1
GO:0010569_regulation_of_double-strand_break_repair_via_homologous_recombination	19	0	0	1	1
GO:0010575_positive_regulation_of_vascular_endothelial_growth_factor_production	28	0	0	1	1
GO:0010586_miRNA_metabolic_process	16	0	0	1	1
GO:0010592_positive_regulation_of_lamellipodium_assembly	25	0	0	1	1
GO:0010595_positive_regulation_of_endothelial_cell_migration	61	0	0	1	1
GO:0010596_negative_regulation_of_endothelial_cell_migration	24	0	0	1	1
GO:0010608_posttranscriptional_regulation_of_gene_expression	24	0	0	1	1
GO:0010613_positive_regulation_of_cardiac_muscle_hypertrophy	21	0	0	1	1
GO:0010614_negative_regulation_of_cardiac_muscle_hypertrophy	19	0	0	1	1
GO:0010628_positive_regulation_of_gene_expression	427	0.23	3.44	0.263097	1	SFRP4
GO:0010629_negative_regulation_of_gene_expression	260	0	0	1	1
GO:0010633_negative_regulation_of_epithelial_cell_migration	16	0	0	1	1
GO:0010634_positive_regulation_of_epithelial_cell_migration	37	0	0	1	1
GO:0010666_positive_regulation_of_cardiac_muscle_cell_apoptotic_process	19	0	0	1	1
GO:0010667_negative_regulation_of_cardiac_muscle_cell_apoptotic_process	37	0	0	1	1
GO:0010700_negative_regulation_of_norepinephrine_secretion	8	0	0	1	1
GO:0010717_regulation_of_epithelial_to_mesenchymal_transition	13	0	0	1	1
GO:0010718_positive_regulation_of_epithelial_to_mesenchymal_transition	45	2.22	33.72	0.0314393	1	PDPN
GO:0010719_negative_regulation_of_epithelial_to_mesenchymal_transition	37	2.7	41.2	0.0259194	1	LDLRAD4
GO:0010737_protein_kinase_A_signaling	14	0	0	1	1
GO:0010738_regulation_of_protein_kinase_A_signaling	15	0	0	1	1
GO:0010739_positive_regulation_of_protein_kinase_A_signaling	11	0	0	1	1
GO:0010744_positive_regulation_of_macrophage_derived_foam_cell_differentiation	19	0	0	1	1
GO:0010745_negative_regulation_of_macrophage_derived_foam_cell_differentiation	13	0	0	1	1
GO:0010759_positive_regulation_of_macrophage_chemotaxis	19	0	0	1	1
GO:0010761_fibroblast_migration	13	0	0	1	1
GO:0010762_regulation_of_fibroblast_migration	12	0	0	1	1
GO:0010763_positive_regulation_of_fibroblast_migration	14	0	0	1	1
GO:0010765_positive_regulation_of_sodium_ion_transport	16	0	0	1	1
GO:0010800_positive_regulation_of_peptidyl-threonine_phosphorylation	30	0	0	1	1
GO:0010801_negative_regulation_of_peptidyl-threonine_phosphorylation	21	0	0	1	1
GO:0010803_regulation_of_tumor_necrosis_factor-mediated_signaling_pathway	29	0	0	1	1
GO:0010804_negative_regulation_of_tumor_necrosis_factor-mediated_signaling_pathway	24	0	0	1	1
GO:0010811_positive_regulation_of_cell-substrate_adhesion	37	0	0	1	1
GO:0010812_negative_regulation_of_cell-substrate_adhesion	18	0	0	1	1
GO:0010818_T_cell_chemotaxis	12	0	0	1	1
GO:0010820_positive_regulation_of_T_cell_chemotaxis	16	0	0	1	1
GO:0010821_regulation_of_mitochondrion_organization	19	0	0	1	1
GO:0010824_regulation_of_centrosome_duplication	19	0	0	1	1
GO:0010831_positive_regulation_of_myotube_differentiation	15	0	0	1	1
GO:0010832_negative_regulation_of_myotube_differentiation	16	0	0	1	1
GO:0010838_positive_regulation_of_keratinocyte_proliferation	14	0	0	1	1
GO:0010839_negative_regulation_of_keratinocyte_proliferation	18	0	0	1	1
GO:0010842_retina_layer_formation	25	0	0	1	1
GO:0010862_positive_regulation_of_pathway-restricted_SMAD_protein_phosphorylation	48	0	0	1	1
GO:0010863_positive_regulation_of_phospholipase_C_activity	13	0	0	1	1
GO:0010867_positive_regulation_of_triglyceride_biosynthetic_process	15	0	0	1	1
GO:0010873_positive_regulation_of_cholesterol_esterification	9	0	0	1	1
GO:0010875_positive_regulation_of_cholesterol_efflux	20	0	0	1	1
GO:0010880_regulation_of_release_of_sequestered_calcium_ion_into_cytosol_by_sarcoplasmic_reticulum	20	0	0	1	1
GO:0010881_regulation_of_cardiac_muscle_contraction_by_regulation_of_the_release_of_sequestered_calcium_ion	24	0	0	1	1
GO:0010884_positive_regulation_of_lipid_storage	13	0	0	1	1
GO:0010887_negative_regulation_of_cholesterol_storage	10	0	0	1	1
GO:0010890_positive_regulation_of_sequestering_of_triglyceride	9	0	0	1	1
GO:0010898_positive_regulation_of_triglyceride_catabolic_process	9	0	0	1	1
GO:0010906_regulation_of_glucose_metabolic_process	26	0	0	1	1
GO:0010917_negative_regulation_of_mitochondrial_membrane_potential	14	0	0	1	1
GO:0010918_positive_regulation_of_mitochondrial_membrane_potential	11	0	0	1	1
GO:0010923_negative_regulation_of_phosphatase_activity	50	0	0	1	1
GO:0010940_positive_regulation_of_necrotic_cell_death	10	0	0	1	1
GO:0010942_positive_regulation_of_cell_death	36	0	0	1	1
GO:0010950_positive_regulation_of_endopeptidase_activity	11	0	0	1	1
GO:0010951_negative_regulation_of_endopeptidase_activity	147	0	0	1	1
GO:0010952_positive_regulation_of_peptidase_activity	13	0	0	1	1
GO:0010954_positive_regulation_of_protein_processing	15	0	0	1	1
GO:0010955_negative_regulation_of_protein_processing	15	0	0	1	1
GO:0010971_positive_regulation_of_G2/M_transition_of_mitotic_cell_cycle	27	0	0	1	1
GO:0010972_negative_regulation_of_G2/M_transition_of_mitotic_cell_cycle	60	0	0	1	1
GO:0010975_regulation_of_neuron_projection_development	31	0	0	1	1
GO:0010976_positive_regulation_of_neuron_projection_development	114	0	0	1	1
GO:0010977_negative_regulation_of_neuron_projection_development	64	0	0	1	1
GO:0010989_negative_regulation_of_low-density_lipoprotein_particle_clearance	14	0	0	1	1
GO:0010996_response_to_auditory_stimulus	14	0	0	1	1
GO:0014002_astrocyte_development	16	0	0	1	1
GO:0014003_oligodendrocyte_development	27	0	0	1	1
GO:0014032_neural_crest_cell_development	21	0	0	1	1
GO:0014047_glutamate_secretion	30	0	0	1	1
GO:0014059_regulation_of_dopamine_secretion	29	0	0	1	1
GO:0014065_phosphatidylinositol_3-kinase_signaling	37	0	0	1	1
GO:0014066_regulation_of_phosphatidylinositol_3-kinase_signaling	22	0	0	1	1
GO:0014067_negative_regulation_of_phosphatidylinositol_3-kinase_signaling	17	0	0	1	1
GO:0014068_positive_regulation_of_phosphatidylinositol_3-kinase_signaling	88	0	0	1	1
GO:0014070_response_to_organic_cyclic_compound	46	0	0	1	1
GO:0014075_response_to_amine	11	0	0	1	1
GO:0014823_response_to_activity	47	0	0	1	1
GO:0014850_response_to_muscle_activity	21	0	0	1	1
GO:0014898_cardiac_muscle_hypertrophy_in_response_to_stress	14	0	0	1	1
GO:0014911_positive_regulation_of_smooth_muscle_cell_migration	19	0	0	1	1
GO:0014912_negative_regulation_of_smooth_muscle_cell_migration	13	0	0	1	1
GO:0015012_heparan_sulfate_proteoglycan_biosynthetic_process	14	0	0	1	1
GO:0015031_protein_transport	320	0	0	1	1
GO:0015074_DNA_integration	8	0	0	1	1
GO:0015671_oxygen_transport	15	0	0	1	1
GO:0015693_magnesium_ion_transport	13	0	0	1	1
GO:0015695_organic_cation_transport	10	0	0	1	1
GO:0015698_inorganic_anion_transport	23	0	0	1	1
GO:0015701_bicarbonate_transport	43	0	0	1	1
GO:0015711_organic_anion_transport	17	0	0	1	1
GO:0015718_monocarboxylic_acid_transport	16	0	0	1	1
GO:0015721_bile_acid_and_bile_salt_transport	28	0	0	1	1
GO:0015760_glucose-6-phosphate_transport	6	0	0	1	1
GO:0015804_neutral_amino_acid_transport	13	0	0	1	1
GO:0015810_aspartate_transmembrane_transport	9	0	0	1	1
GO:0015813_L-glutamate_transmembrane_transport	15	0	0	1	1
GO:0015816_glycine_transport	9	0	0	1	1
GO:0015867_ATP_transport	28	0	0	1	1
GO:0015871_choline_transport	7	0	0	1	1
GO:0015886_heme_transport	8	0	0	1	1
GO:0015909_long-chain_fatty_acid_transport	16	0	0	1	1
GO:0015914_phospholipid_transport	26	0	0	1	1
GO:0015918_sterol_transport	17	0	0	1	1
GO:0015937_coenzyme_A_biosynthetic_process	10	0	0	1	1
GO:0015939_pantothenate_metabolic_process	7	0	0	1	1
GO:0015949_nucleobase-containing_small_molecule_interconversion	27	0	0	1	1
GO:0015986_ATP_synthesis_coupled_proton_transport	13	0	0	1	1
GO:0016024_CDP-diacylglycerol_biosynthetic_process	13	0	0	1	1
GO:0016032_viral_process	454	0	0	1	1
GO:0016042_lipid_catabolic_process	80	0	0	1	1
GO:0016045_detection_of_bacterium	12	0	0	1	1
GO:0016050_vesicle_organization	13	0	0	1	1
GO:0016055_Wnt_signaling_pathway	191	0	0	1	1
GO:0016056_rhodopsin_mediated_signaling_pathway	11	0	0	1	1
GO:0016064_immunoglobulin_mediated_immune_response	13	0	0	1	1
GO:0016070_RNA_metabolic_process	46	0	0	1	1
GO:0016075_rRNA_catabolic_process	16	0	0	1	1
GO:0016079_synaptic_vesicle_exocytosis	24	0	0	1	1
GO:0016081_synaptic_vesicle_docking	11	0	0	1	1
GO:0016082_synaptic_vesicle_priming	16	0	0	1	1
GO:0016125_sterol_metabolic_process	23	0	0	1	1
GO:0016126_sterol_biosynthetic_process	17	0	0	1	1
GO:0016180_snRNA_processing	13	0	0	1	1
GO:0016188_synaptic_vesicle_maturation	11	0	0	1	1
GO:0016192_vesicle-mediated_transport	149	0	0	1	1
GO:0016197_endosomal_transport	90	0	0	1	1
GO:0016226_iron-sulfur_cluster_assembly	20	0	0	1	1
GO:0016233_telomere_capping	28	0	0	1	1
GO:0016236_macroautophagy	93	0	0	1	1
GO:0016239_positive_regulation_of_macroautophagy	33	0	0	1	1
GO:0016241_regulation_of_macroautophagy	71	0	0	1	1
GO:0016242_negative_regulation_of_macroautophagy	15	0	0	1	1
GO:0016254_preassembly_of_GPI_anchor_in_ER_membrane	17	0	0	1	1
GO:0016255_attachment_of_GPI_anchor_to_protein	6	0	0	1	1
GO:0016264_gap_junction_assembly	8	0	0	1	1
GO:0016266_O-glycan_processing	59	0	0	1	1
GO:0016310_phosphorylation	98	0	0	1	1
GO:0016311_dephosphorylation	90	0	0	1	1
GO:0016322_neuron_remodeling	12	0	0	1	1
GO:0016331_morphogenesis_of_embryonic_epithelium	11	0	0	1	1
GO:0016338_calcium-independent_cell-cell_adhesion_via_plasma_membrane_cell-adhesion_molecules	21	0	0	1	1
GO:0016339_calcium-dependent_cell-cell_adhesion_via_plasma_membrane_cell_adhesion_molecules	41	0	0	1	1
GO:0016358_dendrite_development	42	0	0	1	1
GO:0016446_somatic_hypermutation_of_immunoglobulin_genes	13	0	0	1	1
GO:0016477_cell_migration	232	0	0	1	1
GO:0016485_protein_processing	56	0	0	1	1
GO:0016486_peptide_hormone_processing	18	0	0	1	1
GO:0016525_negative_regulation_of_angiogenesis	128	0	0	1	1
GO:0016540_protein_autoprocessing	21	0	0	1	1
GO:0016554_cytidine_to_uridine_editing	12	0	0	1	1
GO:0016558_protein_import_into_peroxisome_matrix	11	0	0	1	1
GO:0016559_peroxisome_fission	9	0	0	1	1
GO:0016567_protein_ubiquitination	490	0	0	1	1
GO:0016571_histone_methylation	18	0	0	1	1
GO:0016572_histone_phosphorylation	13	0	0	1	1
GO:0016573_histone_acetylation	46	0	0	1	1
GO:0016575_histone_deacetylation	38	0	0	1	1
GO:0016578_histone_deubiquitination	13	0	0	1	1
GO:0016579_protein_deubiquitination	262	0	0	1	1
GO:0016584_nucleosome_positioning	14	0	0	1	1
GO:0016601_Rac_protein_signal_transduction	23	0	0	1	1
GO:0016925_protein_sumoylation	63	0	0	1	1
GO:0016926_protein_desumoylation	7	0	0	1	1
GO:0016973_poly(A)+_mRNA_export_from_nucleus	20	0	0	1	1
GO:0017015_regulation_of_transforming_growth_factor_beta_receptor_signaling_pathway	22	0	0	1	1
GO:0017121_plasma_membrane_phospholipid_scrambling	8	0	0	1	1
GO:0017144_drug_metabolic_process	26	0	0	1	1
GO:0017148_negative_regulation_of_translation	79	0	0	1	1
GO:0017156_calcium-ion_regulated_exocytosis	29	0	0	1	1
GO:0017158_regulation_of_calcium_ion-dependent_exocytosis	18	0	0	1	1
GO:0017183_peptidyl-diphthamide_biosynthetic_process_from_peptidyl-histidine	7	0	0	1	1
GO:0017185_peptidyl-lysine_hydroxylation	7	0	0	1	1
GO:0018022_peptidyl-lysine_methylation	12	0	0	1	1
GO:0018023_peptidyl-lysine_trimethylation	11	0	0	1	1
GO:0018026_peptidyl-lysine_monomethylation	10	0	0	1	1
GO:0018095_protein_polyglutamylation	13	0	0	1	1
GO:0018105_peptidyl-serine_phosphorylation	162	0	0	1	1
GO:0018107_peptidyl-threonine_phosphorylation	64	0	0	1	1
GO:0018108_peptidyl-tyrosine_phosphorylation	123	0	0	1	1
GO:0018146_keratan_sulfate_biosynthetic_process	28	0	0	1	1
GO:0018149_peptide_cross-linking	27	0	0	1	1
GO:0018230_peptidyl-L-cysteine_S-palmitoylation	23	0	0	1	1
GO:0018242_protein_O-linked_glycosylation_via_serine	10	0	0	1	1
GO:0018279_protein_N-linked_glycosylation_via_asparagine	30	0	0	1	1
GO:0018298_protein-chromophore_linkage	14	0	0	1	1
GO:0018344_protein_geranylgeranylation	6	0	0	1	1
GO:0018345_protein_palmitoylation	26	0	0	1	1
GO:0018401_peptidyl-proline_hydroxylation_to_4-hydroxy-L-proline	11	0	0	1	1
GO:0019058_viral_life_cycle	30	0	0	1	1
GO:0019068_virion_assembly	12	0	0	1	1
GO:0019079_viral_genome_replication	14	0	0	1	1
GO:0019083_viral_transcription	109	0	0	1	1
GO:0019216_regulation_of_lipid_metabolic_process	92	0	0	1	1
GO:0019221_cytokine-mediated_signaling_pathway	282	0	0	1	1
GO:0019226_transmission_of_nerve_impulse	19	0	0	1	1
GO:0019228_neuronal_action_potential	29	0	0	1	1
GO:0019229_regulation_of_vasoconstriction	16	0	0	1	1
GO:0019233_sensory_perception_of_pain	53	0	0	1	1
GO:0019367_fatty_acid_elongation,_saturated_fatty_acid	7	0	0	1	1
GO:0019369_arachidonic_acid_metabolic_process	30	0	0	1	1
GO:0019370_leukotriene_biosynthetic_process	11	0	0	1	1
GO:0019371_cyclooxygenase_pathway	11	0	0	1	1
GO:0019372_lipoxygenase_pathway	16	0	0	1	1
GO:0019373_epoxygenase_P450_pathway	20	0	0	1	1
GO:0019395_fatty_acid_oxidation	15	0	0	1	1
GO:0019430_removal_of_superoxide_radicals	13	0	0	1	1
GO:0019432_triglyceride_biosynthetic_process	18	0	0	1	1
GO:0019433_triglyceride_catabolic_process	27	0	0	1	1
GO:0019441_tryptophan_catabolic_process_to_kynurenine	5	0	0	1	1
GO:0019509_L-methionine_salvage_from_methylthioadenosine	5	0	0	1	1
GO:0019532_oxalate_transport	10	0	0	1	1
GO:0019674_NAD_metabolic_process	16	0	0	1	1
GO:0019722_calcium-mediated_signaling	84	0	0	1	1
GO:0019725_cellular_homeostasis	13	0	0	1	1
GO:0019730_antimicrobial_humoral_response	55	0	0	1	1
GO:0019731_antibacterial_humoral_response	44	0	0	1	1
GO:0019827_stem_cell_population_maintenance	51	0	0	1	1
GO:0019835_cytolysis	18	0	0	1	1
GO:0019852_L-ascorbic_acid_metabolic_process	9	0	0	1	1
GO:0019882_antigen_processing_and_presentation	21	0	0	1	1
GO:0019885_antigen_processing_and_presentation_of_endogenous_peptide_antigen_via_MHC_class_I	9	0	0	1	1
GO:0019886_antigen_processing_and_presentation_of_exogenous_peptide_antigen_via_MHC_class_II	97	0	0	1	1
GO:0019915_lipid_storage	24	0	0	1	1
GO:0019933_cAMP-mediated_signaling	29	0	0	1	1
GO:0019934_cGMP-mediated_signaling	20	0	0	1	1
GO:0019985_translesion_synthesis	35	0	0	1	1
GO:0021510_spinal_cord_development	32	0	0	1	1
GO:0021522_spinal_cord_motor_neuron_differentiation	19	0	0	1	1
GO:0021527_spinal_cord_association_neuron_differentiation	13	0	0	1	1
GO:0021537_telencephalon_development	18	0	0	1	1
GO:0021542_dentate_gyrus_development	16	0	0	1	1
GO:0021549_cerebellum_development	48	2.08	31.56	0.0335016	1	HAP1
GO:0021591_ventricular_system_development	19	0	0	1	1
GO:0021670_lateral_ventricle_development	12	0	0	1	1
GO:0021675_nerve_development	15	0	0	1	1
GO:0021702_cerebellar_Purkinje_cell_differentiation	12	0	0	1	1
GO:0021756_striatum_development	12	0	0	1	1
GO:0021762_substantia_nigra_development	43	0	0	1	1
GO:0021766_hippocampus_development	64	0	0	1	1
GO:0021772_olfactory_bulb_development	18	0	0	1	1
GO:0021794_thalamus_development	12	0	0	1	1
GO:0021819_layer_formation_in_cerebral_cortex	11	0	0	1	1
GO:0021846_cell_proliferation_in_forebrain	12	0	0	1	1
GO:0021854_hypothalamus_development	12	0	0	1	1
GO:0021895_cerebral_cortex_neuron_differentiation	13	0	0	1	1
GO:0021915_neural_tube_development	29	0	0	1	1
GO:0021954_central_nervous_system_neuron_development	14	0	0	1	1
GO:0021983_pituitary_gland_development	27	0	0	1	1
GO:0021987_cerebral_cortex_development	70	0	0	1	1
GO:0022008_neurogenesis	45	2.22	33.72	0.0314393	1	HAP1
GO:0022010_central_nervous_system_myelination	14	0	0	1	1
GO:0022011_myelination_in_peripheral_nervous_system	18	0	0	1	1
GO:0022038_corpus_callosum_development	14	0	0	1	1
GO:0022400_regulation_of_rhodopsin_mediated_signaling_pathway	26	0	0	1	1
GO:0022407_regulation_of_cell-cell_adhesion	11	0	0	1	1
GO:0022408_negative_regulation_of_cell-cell_adhesion	15	0	0	1	1
GO:0022409_positive_regulation_of_cell-cell_adhesion	18	0	0	1	1
GO:0022604_regulation_of_cell_morphogenesis	24	0	0	1	1
GO:0022617_extracellular_matrix_disassembly	64	0	0	1	1
GO:0022900_electron_transport_chain	68	0	0	1	1
GO:0022904_respiratory_electron_transport_chain	17	0	0	1	1
GO:0023014_signal_transduction_by_protein_phosphorylation	19	0	0	1	1
GO:0023019_signal_transduction_involved_in_regulation_of_gene_expression	20	0	0	1	1
GO:0030007_cellular_potassium_ion_homeostasis	14	0	0	1	1
GO:0030010_establishment_of_cell_polarity	35	0	0	1	1
GO:0030030_cell_projection_organization	39	2.56	39.07	0.0273022	1	HAP1
GO:0030031_cell_projection_assembly	23	0	0	1	1
GO:0030032_lamellipodium_assembly	33	0	0	1	1
GO:0030033_microvillus_assembly	11	0	0	1	1
GO:0030036_actin_cytoskeleton_organization	168	0	0	1	1
GO:0030041_actin_filament_polymerization	33	0	0	1	1
GO:0030042_actin_filament_depolymerization	11	0	0	1	1
GO:0030048_actin_filament-based_movement	18	0	0	1	1
GO:0030049_muscle_filament_sliding	38	0	0	1	1
GO:0030050_vesicle_transport_along_actin_filament	19	0	0	1	1
GO:0030071_regulation_of_mitotic_metaphase/anaphase_transition	10	0	0	1	1
GO:0030073_insulin_secretion	33	0	0	1	1
GO:0030097_hemopoiesis	53	0	0	1	1
GO:0030099_myeloid_cell_differentiation	18	0	0	1	1
GO:0030100_regulation_of_endocytosis	35	0	0	1	1
GO:0030101_natural_killer_cell_activation	22	0	0	1	1
GO:0030111_regulation_of_Wnt_signaling_pathway	23	0	0	1	1
GO:0030148_sphingolipid_biosynthetic_process	52	0	0	1	1
GO:0030150_protein_import_into_mitochondrial_matrix	19	0	0	1	1
GO:0030154_cell_differentiation	590	0.34	5.24	0.0646586	1	FST;SFRP4
GO:0030155_regulation_of_cell_adhesion	49	0	0	1	1
GO:0030162_regulation_of_proteolysis	12	0	0	1	1
GO:0030163_protein_catabolic_process	26	0	0	1	1
GO:0030166_proteoglycan_biosynthetic_process	18	0	0	1	1
GO:0030168_platelet_activation	101	0.99	14.82	0.0692569	1	PDPN
GO:0030177_positive_regulation_of_Wnt_signaling_pathway	36	0	0	1	1
GO:0030178_negative_regulation_of_Wnt_signaling_pathway	47	2.13	32.27	0.0328146	1	SFRP4
GO:0030182_neuron_differentiation	152	0	0	1	1
GO:0030183_B_cell_differentiation	74	0	0	1	1
GO:0030194_positive_regulation_of_blood_coagulation	14	0	0	1	1
GO:0030195_negative_regulation_of_blood_coagulation	13	0	0	1	1
GO:0030198_extracellular_matrix_organization	254	0.39	5.82	0.165577	1	SPP1
GO:0030199_collagen_fibril_organization	48	0	0	1	1
GO:0030206_chondroitin_sulfate_biosynthetic_process	26	0	0	1	1
GO:0030207_chondroitin_sulfate_catabolic_process	14	0	0	1	1
GO:0030208_dermatan_sulfate_biosynthetic_process	12	0	0	1	1
GO:0030212_hyaluronan_metabolic_process	11	0	0	1	1
GO:0030213_hyaluronan_biosynthetic_process	7	0	0	1	1
GO:0030214_hyaluronan_catabolic_process	16	0	0	1	1
GO:0030216_keratinocyte_differentiation	53	0	0	1	1
GO:0030217_T_cell_differentiation	36	0	0	1	1
GO:0030218_erythrocyte_differentiation	48	0	0	1	1
GO:0030220_platelet_formation	19	0	0	1	1
GO:0030224_monocyte_differentiation	17	0	0	1	1
GO:0030225_macrophage_differentiation	22	0	0	1	1
GO:0030238_male_sex_determination	12	0	0	1	1
GO:0030239_myofibril_assembly	13	0	0	1	1
GO:0030259_lipid_glycosylation	12	0	0	1	1
GO:0030261_chromosome_condensation	19	0	0	1	1
GO:0030277_maintenance_of_gastrointestinal_epithelium	15	0	0	1	1
GO:0030278_regulation_of_ossification	12	0	0	1	1
GO:0030279_negative_regulation_of_ossification	19	0	0	1	1
GO:0030282_bone_mineralization	45	0	0	1	1
GO:0030301_cholesterol_transport	19	0	0	1	1
GO:0030307_positive_regulation_of_cell_growth	81	0	0	1	1
GO:0030308_negative_regulation_of_cell_growth	126	0.79	11.84	0.0856842	1	CRYAB
GO:0030311_poly-N-acetyllactosamine_biosynthetic_process	12	0	0	1	1
GO:0030316_osteoclast_differentiation	31	0	0	1	1
GO:0030317_flagellated_sperm_motility	67	0	0	1	1
GO:0030318_melanocyte_differentiation	21	0	0	1	1
GO:0030322_stabilization_of_membrane_potential	17	0	0	1	1
GO:0030324_lung_development	83	1.2	18.08	0.0572565	1	PDPN
GO:0030325_adrenal_gland_development	21	0	0	1	1
GO:0030326_embryonic_limb_morphogenesis	39	0	0	1	1
GO:0030330_DNA_damage_response,_signal_transduction_by_p53_class_mediator	17	0	0	1	1
GO:0030334_regulation_of_cell_migration	100	0	0	1	1
GO:0030335_positive_regulation_of_cell_migration	243	0.41	6.09	0.15898	1	PDPN
GO:0030336_negative_regulation_of_cell_migration	149	0.67	9.99	0.100554	1	LDLRAD4
GO:0030388_fructose_1,6-bisphosphate_metabolic_process	9	0	0	1	1
GO:0030422_production_of_siRNA_involved_in_RNA_interference	11	0	0	1	1
GO:0030431_sleep	12	0	0	1	1
GO:0030433_ubiquitin-dependent_ERAD_pathway	70	0	0	1	1
GO:0030449_regulation_of_complement_activation	48	0	0	1	1
GO:0030488_tRNA_methylation	33	0	0	1	1
GO:0030490_maturation_of_SSU-rRNA	16	0	0	1	1
GO:0030500_regulation_of_bone_mineralization	20	0	0	1	1
GO:0030501_positive_regulation_of_bone_mineralization	39	0	0	1	1
GO:0030502_negative_regulation_of_bone_mineralization	17	0	0	1	1
GO:0030509_BMP_signaling_pathway	84	1.19	17.86	0.057927	1	FST
GO:0030511_positive_regulation_of_transforming_growth_factor_beta_receptor_signaling_pathway	30	0	0	1	1
GO:0030512_negative_regulation_of_transforming_growth_factor_beta_receptor_signaling_pathway	83	1.2	18.08	0.0572565	1	LDLRAD4
GO:0030513_positive_regulation_of_BMP_signaling_pathway	35	0	0	1	1
GO:0030514_negative_regulation_of_BMP_signaling_pathway	50	0	0	1	1
GO:0030516_regulation_of_axon_extension	14	0	0	1	1
GO:0030517_negative_regulation_of_axon_extension	17	0	0	1	1
GO:0030518_intracellular_steroid_hormone_receptor_signaling_pathway	11	0	0	1	1
GO:0030520_intracellular_estrogen_receptor_signaling_pathway	21	0	0	1	1
GO:0030521_androgen_receptor_signaling_pathway	19	0	0	1	1
GO:0030522_intracellular_receptor_signaling_pathway	26	0	0	1	1
GO:0030534_adult_behavior	30	0	0	1	1
GO:0030539_male_genitalia_development	19	0	0	1	1
GO:0030574_collagen_catabolic_process	43	0	0	1	1
GO:0030593_neutrophil_chemotaxis	77	0	0	1	1
GO:0030595_leukocyte_chemotaxis	23	0	0	1	1
GO:0030705_cytoskeleton-dependent_intracellular_transport	19	0	0	1	1
GO:0030833_regulation_of_actin_filament_polymerization	26	0	0	1	1
GO:0030837_negative_regulation_of_actin_filament_polymerization	20	0	0	1	1
GO:0030838_positive_regulation_of_actin_filament_polymerization	51	0	0	1	1
GO:0030855_epithelial_cell_differentiation	68	0	0	1	1
GO:0030857_negative_regulation_of_epithelial_cell_differentiation	11	0	0	1	1
GO:0030865_cortical_cytoskeleton_organization	19	0	0	1	1
GO:0030866_cortical_actin_cytoskeleton_organization	29	0	0	1	1
GO:0030878_thyroid_gland_development	21	0	0	1	1
GO:0030879_mammary_gland_development	22	0	0	1	1
GO:0030889_negative_regulation_of_B_cell_proliferation	17	0	0	1	1
GO:0030890_positive_regulation_of_B_cell_proliferation	41	0	0	1	1
GO:0030900_forebrain_development	46	0	0	1	1
GO:0030901_midbrain_development	29	0	0	1	1
GO:0030902_hindbrain_development	18	0	0	1	1
GO:0030948_negative_regulation_of_vascular_endothelial_growth_factor_receptor_signaling_pathway	14	0	0	1	1
GO:0030949_positive_regulation_of_vascular_endothelial_growth_factor_receptor_signaling_pathway	17	0	0	1	1
GO:0030968_endoplasmic_reticulum_unfolded_protein_response	49	0	0	1	1
GO:0030970_retrograde_protein_transport,_ER_to_cytosol	15	0	0	1	1
GO:0031016_pancreas_development	24	0	0	1	1
GO:0031018_endocrine_pancreas_development	24	0	0	1	1
GO:0031023_microtubule_organizing_center_organization	9	0	0	1	1
GO:0031032_actomyosin_structure_organization	31	0	0	1	1
GO:0031047_gene_silencing_by_RNA	35	0	0	1	1
GO:0031053_primary_miRNA_processing	10	0	0	1	1
GO:0031054_pre-miRNA_processing	14	0	0	1	1
GO:0031065_positive_regulation_of_histone_deacetylation	11	0	0	1	1
GO:0031076_embryonic_camera-type_eye_development	12	0	0	1	1
GO:0031098_stress-activated_protein_kinase_signaling_cascade	20	0	0	1	1
GO:0031100_animal_organ_regeneration	43	0	0	1	1
GO:0031103_axon_regeneration	16	0	0	1	1
GO:0031110_regulation_of_microtubule_polymerization_or_depolymerization	18	0	0	1	1
GO:0031113_regulation_of_microtubule_polymerization	11	0	0	1	1
GO:0031115_negative_regulation_of_microtubule_polymerization	13	0	0	1	1
GO:0031116_positive_regulation_of_microtubule_polymerization	26	0	0	1	1
GO:0031122_cytoplasmic_microtubule_organization	50	0	0	1	1
GO:0031124_mRNA_3'-end_processing	59	0	0	1	1
GO:0031145_anaphase-promoting_complex-dependent_catabolic_process	83	0	0	1	1
GO:0031146_SCF-dependent_proteasomal_ubiquitin-dependent_protein_catabolic_process	92	0	0	1	1
GO:0031167_rRNA_methylation	17	0	0	1	1
GO:0031175_neuron_projection_development	115	0	0	1	1
GO:0031274_positive_regulation_of_pseudopodium_assembly	13	0	0	1	1
GO:0031284_positive_regulation_of_guanylate_cyclase_activity	10	0	0	1	1
GO:0031290_retinal_ganglion_cell_axon_guidance	18	0	0	1	1
GO:0031293_membrane_protein_intracellular_domain_proteolysis	17	0	0	1	1
GO:0031295_T_cell_costimulation	53	0	0	1	1
GO:0031297_replication_fork_processing	29	0	0	1	1
GO:0031333_negative_regulation_of_protein-containing_complex_assembly	36	2.78	42.37	0.0252273	1	CRYAB
GO:0031334_positive_regulation_of_protein-containing_complex_assembly	54	0	0	1	1
GO:0031396_regulation_of_protein_ubiquitination	16	0	0	1	1
GO:0031397_negative_regulation_of_protein_ubiquitination	55	0	0	1	1
GO:0031398_positive_regulation_of_protein_ubiquitination	73	0	0	1	1
GO:0031424_keratinization	179	0	0	1	1
GO:0031529_ruffle_organization	14	0	0	1	1
GO:0031532_actin_cytoskeleton_reorganization	57	0	0	1	1
GO:0031573_intra-S_DNA_damage_checkpoint	15	0	0	1	1
GO:0031581_hemidesmosome_assembly	12	0	0	1	1
GO:0031589_cell-substrate_adhesion	19	0	0	1	1
GO:0031623_receptor_internalization	42	0	0	1	1
GO:0031629_synaptic_vesicle_fusion_to_presynaptic_active_zone_membrane	13	0	0	1	1
GO:0031638_zymogen_activation	21	0	0	1	1
GO:0031639_plasminogen_activation	11	0	0	1	1
GO:0031640_killing_of_cells_of_other_organism	37	0	0	1	1
GO:0031641_regulation_of_myelination	20	0	0	1	1
GO:0031643_positive_regulation_of_myelination	19	0	0	1	1
GO:0031647_regulation_of_protein_stability	81	0	0	1	1
GO:0031648_protein_destabilization	50	0	0	1	1
GO:0031663_lipopolysaccharide-mediated_signaling_pathway	34	0	0	1	1
GO:0031665_negative_regulation_of_lipopolysaccharide-mediated_signaling_pathway	11	0	0	1	1
GO:0031667_response_to_nutrient_levels	41	0	0	1	1
GO:0031668_cellular_response_to_extracellular_stimulus	19	0	0	1	1
GO:0031669_cellular_response_to_nutrient_levels	14	0	0	1	1
GO:0031929_TOR_signaling	19	0	0	1	1
GO:0031936_negative_regulation_of_chromatin_silencing	13	0	0	1	1
GO:0031953_negative_regulation_of_protein_autophosphorylation	12	0	0	1	1
GO:0031954_positive_regulation_of_protein_autophosphorylation	24	0	0	1	1
GO:0032000_positive_regulation_of_fatty_acid_beta-oxidation	10	0	0	1	1
GO:0032006_regulation_of_TOR_signaling	20	0	0	1	1
GO:0032007_negative_regulation_of_TOR_signaling	31	0	0	1	1
GO:0032008_positive_regulation_of_TOR_signaling	34	0	0	1	1
GO:0032012_regulation_of_ARF_protein_signal_transduction	17	0	0	1	1
GO:0032020_ISG15-protein_conjugation	6	0	0	1	1
GO:0032024_positive_regulation_of_insulin_secretion	42	0	0	1	1
GO:0032026_response_to_magnesium_ion	12	0	0	1	1
GO:0032049_cardiolipin_biosynthetic_process	8	0	0	1	1
GO:0032060_bleb_assembly	10	0	0	1	1
GO:0032088_negative_regulation_of_NF-kappaB_transcription_factor_activity	88	0	0	1	1
GO:0032091_negative_regulation_of_protein_binding	77	0	0	1	1
GO:0032092_positive_regulation_of_protein_binding	70	0	0	1	1
GO:0032094_response_to_food	21	0	0	1	1
GO:0032099_negative_regulation_of_appetite	10	0	0	1	1
GO:0032147_activation_of_protein_kinase_activity	67	0	0	1	1
GO:0032148_activation_of_protein_kinase_B_activity	34	0	0	1	1
GO:0032200_telomere_organization	27	0	0	1	1
GO:0032201_telomere_maintenance_via_semi-conservative_replication	24	0	0	1	1
GO:0032204_regulation_of_telomere_maintenance	12	0	0	1	1
GO:0032211_negative_regulation_of_telomere_maintenance_via_telomerase	20	0	0	1	1
GO:0032212_positive_regulation_of_telomere_maintenance_via_telomerase	34	0	0	1	1
GO:0032228_regulation_of_synaptic_transmission,_GABAergic	15	0	0	1	1
GO:0032233_positive_regulation_of_actin_filament_bundle_assembly	13	0	0	1	1
GO:0032259_methylation	59	1.69	25.59	0.0410279	1	METTL7B
GO:0032270_positive_regulation_of_cellular_protein_metabolic_process	16	0	0	1	1
GO:0032330_regulation_of_chondrocyte_differentiation	10	0	0	1	1
GO:0032331_negative_regulation_of_chondrocyte_differentiation	21	0	0	1	1
GO:0032332_positive_regulation_of_chondrocyte_differentiation	19	0	0	1	1
GO:0032355_response_to_estradiol	104	0.96	14.38	0.0712428	1	CRYAB
GO:0032367_intracellular_cholesterol_transport	11	0	0	1	1
GO:0032402_melanosome_transport	21	0	0	1	1
GO:0032418_lysosome_localization	28	0	0	1	1
GO:0032434_regulation_of_proteasomal_ubiquitin-dependent_protein_catabolic_process	13	0	0	1	1
GO:0032435_negative_regulation_of_proteasomal_ubiquitin-dependent_protein_catabolic_process	32	0	0	1	1
GO:0032436_positive_regulation_of_proteasomal_ubiquitin-dependent_protein_catabolic_process	73	0	0	1	1
GO:0032438_melanosome_organization	23	0	0	1	1
GO:0032446_protein_modification_by_small_protein_conjugation	11	0	0	1	1
GO:0032456_endocytic_recycling	40	0	0	1	1
GO:0032465_regulation_of_cytokinesis	42	0	0	1	1
GO:0032467_positive_regulation_of_cytokinesis	39	0	0	1	1
GO:0032469_endoplasmic_reticulum_calcium_ion_homeostasis	17	0	0	1	1
GO:0032479_regulation_of_type_I_interferon_production	13	0	0	1	1
GO:0032480_negative_regulation_of_type_I_interferon_production	32	0	0	1	1
GO:0032481_positive_regulation_of_type_I_interferon_production	52	0	0	1	1
GO:0032482_Rab_protein_signal_transduction	14	0	0	1	1
GO:0032486_Rap_protein_signal_transduction	10	0	0	1	1
GO:0032495_response_to_muramyl_dipeptide	12	0	0	1	1
GO:0032496_response_to_lipopolysaccharide	138	0	0	1	1
GO:0032502_developmental_process	28	0	0	1	1
GO:0032508_DNA_duplex_unwinding	72	0	0	1	1
GO:0032509_endosome_transport_via_multivesicular_body_sorting_pathway	13	0	0	1	1
GO:0032511_late_endosome_to_vacuole_transport_via_multivesicular_body_sorting_pathway	11	0	0	1	1
GO:0032515_negative_regulation_of_phosphoprotein_phosphatase_activity	50	0	0	1	1
GO:0032516_positive_regulation_of_phosphoprotein_phosphatase_activity	15	0	0	1	1
GO:0032525_somite_rostral/caudal_axis_specification	12	0	0	1	1
GO:0032526_response_to_retinoic_acid	44	0	0	1	1
GO:0032543_mitochondrial_translation	31	0	0	1	1
GO:0032570_response_to_progesterone	42	0	0	1	1
GO:0032609_interferon-gamma_production	17	0	0	1	1
GO:0032611_interleukin-1_beta_production	13	0	0	1	1
GO:0032635_interleukin-6_production	13	0	0	1	1
GO:0032675_regulation_of_interleukin-6_production	10	0	0	1	1
GO:0032688_negative_regulation_of_interferon-beta_production	14	0	0	1	1
GO:0032689_negative_regulation_of_interferon-gamma_production	38	0	0	1	1
GO:0032691_negative_regulation_of_interleukin-1_beta_production	39	0	0	1	1
GO:0032693_negative_regulation_of_interleukin-10_production	23	0	0	1	1
GO:0032695_negative_regulation_of_interleukin-12_production	17	0	0	1	1
GO:0032700_negative_regulation_of_interleukin-17_production	22	0	0	1	1
GO:0032703_negative_regulation_of_interleukin-2_production	23	0	0	1	1
GO:0032715_negative_regulation_of_interleukin-6_production	66	0	0	1	1
GO:0032717_negative_regulation_of_interleukin-8_production	37	0	0	1	1
GO:0032720_negative_regulation_of_tumor_necrosis_factor_production	55	0	0	1	1
GO:0032722_positive_regulation_of_chemokine_production	19	0	0	1	1
GO:0032725_positive_regulation_of_granulocyte_macrophage_colony-stimulating_factor_production	11	0	0	1	1
GO:0032727_positive_regulation_of_interferon-alpha_production	20	0	0	1	1
GO:0032728_positive_regulation_of_interferon-beta_production	30	0	0	1	1
GO:0032729_positive_regulation_of_interferon-gamma_production	65	0	0	1	1
GO:0032731_positive_regulation_of_interleukin-1_beta_production	53	0	0	1	1
GO:0032733_positive_regulation_of_interleukin-10_production	38	0	0	1	1
GO:0032735_positive_regulation_of_interleukin-12_production	35	0	0	1	1
GO:0032736_positive_regulation_of_interleukin-13_production	12	0	0	1	1
GO:0032740_positive_regulation_of_interleukin-17_production	18	0	0	1	1
GO:0032743_positive_regulation_of_interleukin-2_production	26	0	0	1	1
GO:0032753_positive_regulation_of_interleukin-4_production	24	0	0	1	1
GO:0032754_positive_regulation_of_interleukin-5_production	11	0	0	1	1
GO:0032755_positive_regulation_of_interleukin-6_production	88	0	0	1	1
GO:0032757_positive_regulation_of_interleukin-8_production	54	0	0	1	1
GO:0032760_positive_regulation_of_tumor_necrosis_factor_production	50	0	0	1	1
GO:0032780_negative_regulation_of_ATPase_activity	12	0	0	1	1
GO:0032781_positive_regulation_of_ATPase_activity	40	0	0	1	1
GO:0032784_regulation_of_DNA-templated_transcription,_elongation	9	0	0	1	1
GO:0032786_positive_regulation_of_DNA-templated_transcription,_elongation	16	0	0	1	1
GO:0032793_positive_regulation_of_CREB_transcription_factor_activity	19	0	0	1	1
GO:0032801_receptor_catabolic_process	13	0	0	1	1
GO:0032802_low-density_lipoprotein_particle_receptor_catabolic_process	10	0	0	1	1
GO:0032836_glomerular_basement_membrane_development	9	0	0	1	1
GO:0032868_response_to_insulin	67	0	0	1	1
GO:0032869_cellular_response_to_insulin_stimulus	100	0	0	1	1
GO:0032870_cellular_response_to_hormone_stimulus	29	0	0	1	1
GO:0032874_positive_regulation_of_stress-activated_MAPK_cascade	18	0	0	1	1
GO:0032880_regulation_of_protein_localization	59	0	0	1	1
GO:0032886_regulation_of_microtubule-based_process	9	0	0	1	1
GO:0032897_negative_regulation_of_viral_transcription	13	0	0	1	1
GO:0032922_circadian_regulation_of_gene_expression	66	0	0	1	1
GO:0032924_activin_receptor_signaling_pathway	19	0	0	1	1
GO:0032930_positive_regulation_of_superoxide_anion_generation	19	0	0	1	1
GO:0032933_SREBP_signaling_pathway	9	0	0	1	1
GO:0032956_regulation_of_actin_cytoskeleton_organization	74	1.35	20.31	0.0512015	1	GRHL3
GO:0032958_inositol_phosphate_biosynthetic_process	11	0	0	1	1
GO:0032963_collagen_metabolic_process	14	0	0	1	1
GO:0032966_negative_regulation_of_collagen_biosynthetic_process	17	0	0	1	1
GO:0032967_positive_regulation_of_collagen_biosynthetic_process	26	0	0	1	1
GO:0032968_positive_regulation_of_transcription_elongation_from_RNA_polymerase_II_promoter	13	0	0	1	1
GO:0032981_mitochondrial_respiratory_chain_complex_I_assembly	65	0	0	1	1
GO:0033077_T_cell_differentiation_in_thymus	31	0	0	1	1
GO:0033120_positive_regulation_of_RNA_splicing	14	0	0	1	1
GO:0033137_negative_regulation_of_peptidyl-serine_phosphorylation	27	0	0	1	1
GO:0033138_positive_regulation_of_peptidyl-serine_phosphorylation	90	0	0	1	1
GO:0033141_positive_regulation_of_peptidyl-serine_phosphorylation_of_STAT_protein	20	0	0	1	1
GO:0033146_regulation_of_intracellular_estrogen_receptor_signaling_pathway	15	0	0	1	1
GO:0033147_negative_regulation_of_intracellular_estrogen_receptor_signaling_pathway	13	0	0	1	1
GO:0033148_positive_regulation_of_intracellular_estrogen_receptor_signaling_pathway	11	0	0	1	1
GO:0033151_V(D)J_recombination	8	0	0	1	1
GO:0033169_histone_H3-K9_demethylation	14	0	0	1	1
GO:0033173_calcineurin-NFAT_signaling_cascade	12	0	0	1	1
GO:0033189_response_to_vitamin_A	19	0	0	1	1
GO:0033198_response_to_ATP	18	0	0	1	1
GO:0033209_tumor_necrosis_factor-mediated_signaling_pathway	122	0	0	1	1
GO:0033210_leptin-mediated_signaling_pathway	8	0	0	1	1
GO:0033234_negative_regulation_of_protein_sumoylation	12	0	0	1	1
GO:0033235_positive_regulation_of_protein_sumoylation	12	0	0	1	1
GO:0033314_mitotic_DNA_replication_checkpoint	10	0	0	1	1
GO:0033327_Leydig_cell_differentiation	11	0	0	1	1
GO:0033344_cholesterol_efflux	23	0	0	1	1
GO:0033365_protein_localization_to_organelle	18	0	0	1	1
GO:0033539_fatty_acid_beta-oxidation_using_acyl-CoA_dehydrogenase	10	0	0	1	1
GO:0033540_fatty_acid_beta-oxidation_using_acyl-CoA_oxidase	15	0	0	1	1
GO:0033572_transferrin_transport	36	0	0	1	1
GO:0033574_response_to_testosterone	31	0	0	1	1
GO:0033617_mitochondrial_cytochrome_c_oxidase_assembly	22	0	0	1	1
GO:0033619_membrane_protein_proteolysis	12	0	0	1	1
GO:0033622_integrin_activation	9	0	0	1	1
GO:0033627_cell_adhesion_mediated_by_integrin	21	0	0	1	1
GO:0033628_regulation_of_cell_adhesion_mediated_by_integrin	13	0	0	1	1
GO:0033630_positive_regulation_of_cell_adhesion_mediated_by_integrin	15	0	0	1	1
GO:0033673_negative_regulation_of_kinase_activity	13	0	0	1	1
GO:0033674_positive_regulation_of_kinase_activity	72	0	0	1	1
GO:0033683_nucleotide-excision_repair,_DNA_incision	38	0	0	1	1
GO:0033689_negative_regulation_of_osteoblast_proliferation	15	0	0	1	1
GO:0033690_positive_regulation_of_osteoblast_proliferation	12	0	0	1	1
GO:0033700_phospholipid_efflux	12	0	0	1	1
GO:0033962_P-body_assembly	13	0	0	1	1
GO:0033993_response_to_lipid	14	0	0	1	1
GO:0034058_endosomal_vesicle_fusion	8	0	0	1	1
GO:0034063_stress_granule_assembly	20	0	0	1	1
GO:0034067_protein_localization_to_Golgi_apparatus	21	0	0	1	1
GO:0034080_CENP-A_containing_nucleosome_assembly	43	0	0	1	1
GO:0034097_response_to_cytokine	44	0	0	1	1
GO:0034113_heterotypic_cell-cell_adhesion	29	0	0	1	1
GO:0034115_negative_regulation_of_heterotypic_cell-cell_adhesion	11	0	0	1	1
GO:0034116_positive_regulation_of_heterotypic_cell-cell_adhesion	16	0	0	1	1
GO:0034122_negative_regulation_of_toll-like_receptor_signaling_pathway	17	0	0	1	1
GO:0034138_toll-like_receptor_3_signaling_pathway	11	0	0	1	1
GO:0034142_toll-like_receptor_4_signaling_pathway	17	0	0	1	1
GO:0034144_negative_regulation_of_toll-like_receptor_4_signaling_pathway	13	0	0	1	1
GO:0034162_toll-like_receptor_9_signaling_pathway	16	0	0	1	1
GO:0034198_cellular_response_to_amino_acid_starvation	44	0	0	1	1
GO:0034199_activation_of_protein_kinase_A_activity	18	0	0	1	1
GO:0034220_ion_transmembrane_transport	209	0.48	7.1	0.138275	1	GLRA1
GO:0034244_negative_regulation_of_transcription_elongation_from_RNA_polymerase_II_promoter	13	0	0	1	1
GO:0034260_negative_regulation_of_GTPase_activity	49	0	0	1	1
GO:0034314_Arp2/3_complex-mediated_actin_nucleation	19	0	0	1	1
GO:0034329_cell_junction_assembly	18	0	0	1	1
GO:0034332_adherens_junction_organization	44	0	0	1	1
GO:0034333_adherens_junction_assembly	11	0	0	1	1
GO:0034341_response_to_interferon-gamma	23	0	0	1	1
GO:0034356_NAD_biosynthesis_via_nicotinamide_riboside_salvage_pathway	14	0	0	1	1
GO:0034371_chylomicron_remodeling	9	0	0	1	1
GO:0034372_very-low-density_lipoprotein_particle_remodeling	9	0	0	1	1
GO:0034374_low-density_lipoprotein_particle_remodeling	16	0	0	1	1
GO:0034375_high-density_lipoprotein_particle_remodeling	18	0	0	1	1
GO:0034378_chylomicron_assembly	11	0	0	1	1
GO:0034379_very-low-density_lipoprotein_particle_assembly	13	0	0	1	1
GO:0034380_high-density_lipoprotein_particle_assembly	13	0	0	1	1
GO:0034382_chylomicron_remnant_clearance	8	0	0	1	1
GO:0034383_low-density_lipoprotein_particle_clearance	24	0	0	1	1
GO:0034384_high-density_lipoprotein_particle_clearance	10	0	0	1	1
GO:0034389_lipid_droplet_organization	20	0	0	1	1
GO:0034394_protein_localization_to_cell_surface	27	0	0	1	1
GO:0034446_substrate_adhesion-dependent_cell_spreading	56	0	0	1	1
GO:0034453_microtubule_anchoring	15	0	0	1	1
GO:0034454_microtubule_anchoring_at_centrosome	10	0	0	1	1
GO:0034472_snRNA_3'-end_processing	19	0	0	1	1
GO:0034497_protein_localization_to_phagophore_assembly_site	12	0	0	1	1
GO:0034501_protein_localization_to_kinetochore	11	0	0	1	1
GO:0034504_protein_localization_to_nucleus	34	0	0	1	1
GO:0034551_mitochondrial_respiratory_chain_complex_III_assembly	10	0	0	1	1
GO:0034587_piRNA_metabolic_process	15	0	0	1	1
GO:0034599_cellular_response_to_oxidative_stress	94	0	0	1	1
GO:0034605_cellular_response_to_heat	51	0	0	1	1
GO:0034612_response_to_tumor_necrosis_factor	31	0	0	1	1
GO:0034613_cellular_protein_localization	60	0	0	1	1
GO:0034614_cellular_response_to_reactive_oxygen_species	36	0	0	1	1
GO:0034620_cellular_response_to_unfolded_protein	26	0	0	1	1
GO:0034622_cellular_protein-containing_complex_assembly	22	0	0	1	1
GO:0034626_fatty_acid_elongation,_polyunsaturated_fatty_acid	7	0	0	1	1
GO:0034629_cellular_protein-containing_complex_localization	10	0	0	1	1
GO:0034638_phosphatidylcholine_catabolic_process	12	0	0	1	1
GO:0034644_cellular_response_to_UV	51	0	0	1	1
GO:0034656_nucleobase-containing_small_molecule_catabolic_process	15	0	0	1	1
GO:0034720_histone_H3-K4_demethylation	8	0	0	1	1
GO:0034765_regulation_of_ion_transmembrane_transport	113	0	0	1	1
GO:0034968_histone_lysine_methylation	13	0	0	1	1
GO:0034976_response_to_endoplasmic_reticulum_stress	75	0	0	1	1
GO:0035019_somatic_stem_cell_population_maintenance	63	0	0	1	1
GO:0035023_regulation_of_Rho_protein_signal_transduction	28	0	0	1	1
GO:0035024_negative_regulation_of_Rho_protein_signal_transduction	22	0	0	1	1
GO:0035025_positive_regulation_of_Rho_protein_signal_transduction	33	0	0	1	1
GO:0035036_sperm-egg_recognition	18	0	0	1	1
GO:0035050_embryonic_heart_tube_development	16	0	0	1	1
GO:0035066_positive_regulation_of_histone_acetylation	18	0	0	1	1
GO:0035067_negative_regulation_of_histone_acetylation	10	0	0	1	1
GO:0035082_axoneme_assembly	21	0	0	1	1
GO:0035094_response_to_nicotine	32	0	0	1	1
GO:0035108_limb_morphogenesis	14	0	0	1	1
GO:0035115_embryonic_forelimb_morphogenesis	33	0	0	1	1
GO:0035116_embryonic_hindlimb_morphogenesis	29	0	0	1	1
GO:0035148_tube_formation	11	0	0	1	1
GO:0035162_embryonic_hemopoiesis	18	0	0	1	1
GO:0035176_social_behavior	51	0	0	1	1
GO:0035195_gene_silencing_by_miRNA	573	0	0	1	1
GO:0035196_production_of_miRNAs_involved_in_gene_silencing_by_miRNA	14	0	0	1	1
GO:0035235_ionotropic_glutamate_receptor_signaling_pathway	23	0	0	1	1
GO:0035249_synaptic_transmission,_glutamatergic	28	0	0	1	1
GO:0035264_multicellular_organism_growth	85	0	0	1	1
GO:0035269_protein_O-linked_mannosylation	19	0	0	1	1
GO:0035278_miRNA_mediated_inhibition_of_translation	96	0	0	1	1
GO:0035307_positive_regulation_of_protein_dephosphorylation	26	0	0	1	1
GO:0035313_wound_healing,_spreading_of_epidermal_cells	11	0	0	1	1
GO:0035329_hippo_signaling	27	0	0	1	1
GO:0035331_negative_regulation_of_hippo_signaling	11	0	0	1	1
GO:0035335_peptidyl-tyrosine_dephosphorylation	99	0	0	1	1
GO:0035372_protein_localization_to_microtubule	10	0	0	1	1
GO:0035418_protein_localization_to_synapse	12	0	0	1	1
GO:0035435_phosphate_ion_transmembrane_transport	15	0	0	1	1
GO:0035455_response_to_interferon-alpha	10	0	0	1	1
GO:0035456_response_to_interferon-beta	10	0	0	1	1
GO:0035457_cellular_response_to_interferon-alpha	11	0	0	1	1
GO:0035458_cellular_response_to_interferon-beta	22	0	0	1	1
GO:0035459_vesicle_cargo_loading	12	0	0	1	1
GO:0035493_SNARE_complex_assembly	11	0	0	1	1
GO:0035518_histone_H2A_monoubiquitination	12	0	0	1	1
GO:0035556_intracellular_signal_transduction	372	0.27	3.95	0.23333	1	TGFA
GO:0035563_positive_regulation_of_chromatin_binding	13	0	0	1	1
GO:0035584_calcium-mediated_signaling_using_intracellular_calcium_source	22	0	0	1	1
GO:0035589_G_protein-coupled_purinergic_nucleotide_receptor_signaling_pathway	14	0	0	1	1
GO:0035633_maintenance_of_blood-brain_barrier	31	0	0	1	1
GO:0035640_exploration_behavior	14	0	0	1	1
GO:0035641_locomotory_exploration_behavior	13	0	0	1	1
GO:0035655_interleukin-18-mediated_signaling_pathway	7	0	0	1	1
GO:0035666_TRIF-dependent_toll-like_receptor_signaling_pathway	30	0	0	1	1
GO:0035690_cellular_response_to_drug	67	0	0	1	1
GO:0035721_intraciliary_retrograde_transport	10	0	0	1	1
GO:0035722_interleukin-12-mediated_signaling_pathway	47	0	0	1	1
GO:0035723_interleukin-15-mediated_signaling_pathway	13	0	0	1	1
GO:0035725_sodium_ion_transmembrane_transport	99	0	0	1	1
GO:0035729_cellular_response_to_hepatocyte_growth_factor_stimulus	16	0	0	1	1
GO:0035735_intraciliary_transport_involved_in_cilium_assembly	40	0	0	1	1
GO:0035774_positive_regulation_of_insulin_secretion_involved_in_cellular_response_to_glucose_stimulus	34	0	0	1	1
GO:0035810_positive_regulation_of_urine_volume	14	0	0	1	1
GO:0035815_positive_regulation_of_renal_sodium_excretion	14	0	0	1	1
GO:0035845_photoreceptor_cell_outer_segment_organization	12	0	0	1	1
GO:0035855_megakaryocyte_development	17	0	0	1	1
GO:0035865_cellular_response_to_potassium_ion	11	0	0	1	1
GO:0035871_protein_K11-linked_deubiquitination	10	0	0	1	1
GO:0035902_response_to_immobilization_stress	22	0	0	1	1
GO:0035904_aorta_development	22	0	0	1	1
GO:0035909_aorta_morphogenesis	14	0	0	1	1
GO:0035914_skeletal_muscle_cell_differentiation	45	0	0	1	1
GO:0035924_cellular_response_to_vascular_endothelial_growth_factor_stimulus	33	0	0	1	1
GO:0035965_cardiolipin_acyl-chain_remodeling	8	0	0	1	1
GO:0035970_peptidyl-threonine_dephosphorylation	22	0	0	1	1
GO:0035987_endodermal_cell_differentiation	28	0	0	1	1
GO:0035988_chondrocyte_proliferation	10	0	0	1	1
GO:0035994_response_to_muscle_stretch	15	0	0	1	1
GO:0035999_tetrahydrofolate_interconversion	10	0	0	1	1
GO:0036010_protein_localization_to_endosome	10	0	0	1	1
GO:0036065_fucosylation	11	0	0	1	1
GO:0036092_phosphatidylinositol-3-phosphate_biosynthetic_process	14	0	0	1	1
GO:0036109_alpha-linolenic_acid_metabolic_process	13	0	0	1	1
GO:0036120_cellular_response_to_platelet-derived_growth_factor_stimulus	22	0	0	1	1
GO:0036148_phosphatidylglycerol_acyl-chain_remodeling	18	0	0	1	1
GO:0036149_phosphatidylinositol_acyl-chain_remodeling	18	0	0	1	1
GO:0036150_phosphatidylserine_acyl-chain_remodeling	21	0	0	1	1
GO:0036151_phosphatidylcholine_acyl-chain_remodeling	29	0	0	1	1
GO:0036152_phosphatidylethanolamine_acyl-chain_remodeling	26	0	0	1	1
GO:0036158_outer_dynein_arm_assembly	19	0	0	1	1
GO:0036159_inner_dynein_arm_assembly	15	0	0	1	1
GO:0036258_multivesicular_body_assembly	30	0	0	1	1
GO:0036297_interstrand_cross-link_repair	52	0	0	1	1
GO:0036342_post-anal_tail_morphogenesis	19	0	0	1	1
GO:0036353_histone_H2A-K119_monoubiquitination	8	0	0	1	1
GO:0036376_sodium_ion_export_across_plasma_membrane	14	0	0	1	1
GO:0036444_calcium_import_into_the_mitochondrion	11	0	0	1	1
GO:0036498_IRE1-mediated_unfolded_protein_response	56	0	0	1	1
GO:0036499_PERK-mediated_unfolded_protein_response	12	0	0	1	1
GO:0036503_ERAD_pathway	16	0	0	1	1
GO:0038003_opioid_receptor_signaling_pathway	10	0	0	1	1
GO:0038061_NIK/NF-kappaB_signaling	70	0	0	1	1
GO:0038063_collagen-activated_tyrosine_kinase_receptor_signaling_pathway	12	0	0	1	1
GO:0038083_peptidyl-tyrosine_autophosphorylation	36	0	0	1	1
GO:0038084_vascular_endothelial_growth_factor_signaling_pathway	15	0	0	1	1
GO:0038095_Fc-epsilon_receptor_signaling_pathway	110	0	0	1	1
GO:0038096_Fc-gamma_receptor_signaling_pathway_involved_in_phagocytosis	71	0	0	1	1
GO:0038110_interleukin-2-mediated_signaling_pathway	11	0	0	1	1
GO:0038111_interleukin-7-mediated_signaling_pathway	30	0	0	1	1
GO:0038128_ERBB2_signaling_pathway	31	0	0	1	1
GO:0038180_nerve_growth_factor_signaling_pathway	12	0	0	1	1
GO:0038202_TORC1_signaling	8	0	0	1	1
GO:0039702_viral_budding_via_host_ESCRT_complex	20	0	0	1	1
GO:0040008_regulation_of_growth	62	0	0	1	1
GO:0040014_regulation_of_multicellular_organism_growth	27	0	0	1	1
GO:0040015_negative_regulation_of_multicellular_organism_growth	11	0	0	1	1
GO:0040018_positive_regulation_of_multicellular_organism_growth	33	0	0	1	1
GO:0040019_positive_regulation_of_embryonic_development	11	0	0	1	1
GO:0040029_regulation_of_gene_expression,_epigenetic	14	0	0	1	1
GO:0040037_negative_regulation_of_fibroblast_growth_factor_receptor_signaling_pathway	24	0	0	1	1
GO:0042026_protein_refolding	19	0	0	1	1
GO:0042058_regulation_of_epidermal_growth_factor_receptor_signaling_pathway	11	0	0	1	1
GO:0042059_negative_regulation_of_epidermal_growth_factor_receptor_signaling_pathway	36	2.78	42.37	0.0252273	1	TGFA
GO:0042060_wound_healing	89	1.12	16.83	0.0612728	1	GRHL3
GO:0042073_intraciliary_transport	28	0	0	1	1
GO:0042098_T_cell_proliferation	22	0	0	1	1
GO:0042100_B_cell_proliferation	35	0	0	1	1
GO:0042102_positive_regulation_of_T_cell_proliferation	61	0	0	1	1
GO:0042104_positive_regulation_of_activated_T_cell_proliferation	26	0	0	1	1
GO:0042110_T_cell_activation	44	0	0	1	1
GO:0042113_B_cell_activation	33	0	0	1	1
GO:0042116_macrophage_activation	13	0	0	1	1
GO:0042119_neutrophil_activation	12	0	0	1	1
GO:0042127_regulation_of_cell_population_proliferation	166	0	0	1	1
GO:0042129_regulation_of_T_cell_proliferation	10	0	0	1	1
GO:0042130_negative_regulation_of_T_cell_proliferation	40	0	0	1	1
GO:0042136_neurotransmitter_biosynthetic_process	12	0	0	1	1
GO:0042147_retrograde_transport,_endosome_to_Golgi	77	0	0	1	1
GO:0042149_cellular_response_to_glucose_starvation	49	0	0	1	1
GO:0042157_lipoprotein_metabolic_process	20	0	0	1	1
GO:0042167_heme_catabolic_process	7	0	0	1	1
GO:0042176_regulation_of_protein_catabolic_process	16	0	0	1	1
GO:0042177_negative_regulation_of_protein_catabolic_process	35	0	0	1	1
GO:0042220_response_to_cocaine	35	0	0	1	1
GO:0042246_tissue_regeneration	23	0	0	1	1
GO:0042254_ribosome_biogenesis	27	0	0	1	1
GO:0042267_natural_killer_cell_mediated_cytotoxicity	19	0	0	1	1
GO:0042273_ribosomal_large_subunit_biogenesis	27	0	0	1	1
GO:0042274_ribosomal_small_subunit_biogenesis	18	0	0	1	1
GO:0042276_error-prone_translesion_synthesis	21	0	0	1	1
GO:0042307_positive_regulation_of_protein_import_into_nucleus	40	0	0	1	1
GO:0042308_negative_regulation_of_protein_import_into_nucleus	13	0	0	1	1
GO:0042310_vasoconstriction	16	0	0	1	1
GO:0042311_vasodilation	20	0	0	1	1
GO:0042325_regulation_of_phosphorylation	14	0	0	1	1
GO:0042326_negative_regulation_of_phosphorylation	16	0	0	1	1
GO:0042327_positive_regulation_of_phosphorylation	26	0	0	1	1
GO:0042340_keratan_sulfate_catabolic_process	12	0	0	1	1
GO:0042359_vitamin_D_metabolic_process	12	0	0	1	1
GO:0042391_regulation_of_membrane_potential	99	1.01	15.12	0.0679307	1	GLRA1
GO:0042403_thyroid_hormone_metabolic_process	8	0	0	1	1
GO:0042407_cristae_formation	32	0	0	1	1
GO:0042417_dopamine_metabolic_process	13	0	0	1	1
GO:0042438_melanin_biosynthetic_process	13	0	0	1	1
GO:0042445_hormone_metabolic_process	14	0	0	1	1
GO:0042446_hormone_biosynthetic_process	12	0	0	1	1
GO:0042448_progesterone_metabolic_process	10	0	0	1	1
GO:0042462_eye_photoreceptor_cell_development	18	0	0	1	1
GO:0042472_inner_ear_morphogenesis	57	0	0	1	1
GO:0042474_middle_ear_morphogenesis	20	0	0	1	1
GO:0042475_odontogenesis_of_dentin-containing_tooth	57	1.75	26.5	0.0396636	1	FST
GO:0042476_odontogenesis	33	0	0	1	1
GO:0042493_response_to_drug	284	0	0	1	1
GO:0042531_positive_regulation_of_tyrosine_phosphorylation_of_STAT_protein	71	0	0	1	1
GO:0042532_negative_regulation_of_tyrosine_phosphorylation_of_STAT_protein	16	0	0	1	1
GO:0042542_response_to_hydrogen_peroxide	51	1.96	29.67	0.0355597	1	CRYAB
GO:0042551_neuron_maturation	14	0	0	1	1
GO:0042552_myelination	48	2.08	31.56	0.0335016	1	ACSBG1
GO:0042554_superoxide_anion_generation	16	0	0	1	1
GO:0042572_retinol_metabolic_process	47	0	0	1	1
GO:0042573_retinoic_acid_metabolic_process	25	0	0	1	1
GO:0042574_retinal_metabolic_process	15	0	0	1	1
GO:0042592_homeostatic_process	11	0	0	1	1
GO:0042593_glucose_homeostasis	115	0	0	1	1
GO:0042594_response_to_starvation	41	0	0	1	1
GO:0042632_cholesterol_homeostasis	101	0	0	1	1
GO:0042633_hair_cycle	14	0	0	1	1
GO:0042692_muscle_cell_differentiation	13	0	0	1	1
GO:0042711_maternal_behavior	12	0	0	1	1
GO:0042730_fibrinolysis	20	0	0	1	1
GO:0042733_embryonic_digit_morphogenesis	55	0	0	1	1
GO:0042738_exogenous_drug_catabolic_process	24	0	0	1	1
GO:0042742_defense_response_to_bacterium	128	0	0	1	1
GO:0042744_hydrogen_peroxide_catabolic_process	28	0	0	1	1
GO:0042752_regulation_of_circadian_rhythm	65	0	0	1	1
GO:0042754_negative_regulation_of_circadian_rhythm	10	0	0	1	1
GO:0042755_eating_behavior	23	0	0	1	1
GO:0042760_very_long-chain_fatty_acid_catabolic_process	6	0	0	1	1
GO:0042761_very_long-chain_fatty_acid_biosynthetic_process	13	0	0	1	1
GO:0042769_DNA_damage_response,_detection_of_DNA_damage	37	0	0	1	1
GO:0042770_signal_transduction_in_response_to_DNA_damage	12	0	0	1	1
GO:0042771_intrinsic_apoptotic_signaling_pathway_in_response_to_DNA_damage_by_p53_class_mediator	29	0	0	1	1
GO:0042776_mitochondrial_ATP_synthesis_coupled_proton_transport	21	0	0	1	1
GO:0042789_mRNA_transcription_by_RNA_polymerase_II	11	0	0	1	1
GO:0042795_snRNA_transcription_by_RNA_polymerase_II	70	0	0	1	1
GO:0042832_defense_response_to_protozoan	26	0	0	1	1
GO:0042908_xenobiotic_transport	19	0	0	1	1
GO:0042953_lipoprotein_transport	14	0	0	1	1
GO:0042981_regulation_of_apoptotic_process	199	0	0	1	1
GO:0042982_amyloid_precursor_protein_metabolic_process	11	0	0	1	1
GO:0042985_negative_regulation_of_amyloid_precursor_protein_biosynthetic_process	11	0	0	1	1
GO:0042987_amyloid_precursor_protein_catabolic_process	10	0	0	1	1
GO:0042989_sequestering_of_actin_monomers	10	0	0	1	1
GO:0043001_Golgi_to_plasma_membrane_protein_transport	29	0	0	1	1
GO:0043010_camera-type_eye_development	42	0	0	1	1
GO:0043011_myeloid_dendritic_cell_differentiation	18	0	0	1	1
GO:0043029_T_cell_homeostasis	28	0	0	1	1
GO:0043031_negative_regulation_of_macrophage_activation	10	0	0	1	1
GO:0043032_positive_regulation_of_macrophage_activation	18	0	0	1	1
GO:0043044_ATP-dependent_chromatin_remodeling	34	0	0	1	1
GO:0043046_DNA_methylation_involved_in_gamete_generation	20	0	0	1	1
GO:0043065_positive_regulation_of_apoptotic_process	355	0.28	4.15	0.223901	1	SFRP4
GO:0043066_negative_regulation_of_apoptotic_process	492	0.41	6.31	0.0468213	1	PDPN;CRYAB
GO:0043068_positive_regulation_of_programmed_cell_death	10	0	0	1	1
GO:0043069_negative_regulation_of_programmed_cell_death	15	0	0	1	1
GO:0043085_positive_regulation_of_catalytic_activity	82	0	0	1	1
GO:0043086_negative_regulation_of_catalytic_activity	52	0	0	1	1
GO:0043087_regulation_of_GTPase_activity	71	0	0	1	1
GO:0043097_pyrimidine_nucleoside_salvage	11	0	0	1	1
GO:0043101_purine-containing_compound_salvage	13	0	0	1	1
GO:0043113_receptor_clustering	26	0	0	1	1
GO:0043114_regulation_of_vascular_permeability	12	0	0	1	1
GO:0043116_negative_regulation_of_vascular_permeability	14	0	0	1	1
GO:0043117_positive_regulation_of_vascular_permeability	11	0	0	1	1
GO:0043122_regulation_of_I-kappaB_kinase/NF-kappaB_signaling	29	0	0	1	1
GO:0043123_positive_regulation_of_I-kappaB_kinase/NF-kappaB_signaling	185	0.54	8.03	0.12337	1	SECTM1
GO:0043124_negative_regulation_of_I-kappaB_kinase/NF-kappaB_signaling	51	0	0	1	1
GO:0043149_stress_fiber_assembly	16	0	0	1	1
GO:0043153_entrainment_of_circadian_clock_by_photoperiod	29	0	0	1	1
GO:0043154_negative_regulation_of_cysteine-type_endopeptidase_activity_involved_in_apoptotic_process	74	1.35	20.31	0.0512015	1	CRYAB
GO:0043161_proteasome-mediated_ubiquitin-dependent_protein_catabolic_process	181	0	0	1	1
GO:0043162_ubiquitin-dependent_protein_catabolic_process_via_the_multivesicular_body_sorting_pathway	19	0	0	1	1
GO:0043171_peptide_catabolic_process	16	0	0	1	1
GO:0043248_proteasome_assembly	9	0	0	1	1
GO:0043249_erythrocyte_maturation	15	0	0	1	1
GO:0043252_sodium-independent_organic_anion_transport	16	0	0	1	1
GO:0043254_regulation_of_protein-containing_complex_assembly	19	0	0	1	1
GO:0043276_anoikis	11	0	0	1	1
GO:0043277_apoptotic_cell_clearance	21	0	0	1	1
GO:0043278_response_to_morphine	26	0	0	1	1
GO:0043280_positive_regulation_of_cysteine-type_endopeptidase_activity_involved_in_apoptotic_process	55	0	0	1	1
GO:0043303_mast_cell_degranulation	14	0	0	1	1
GO:0043304_regulation_of_mast_cell_degranulation	10	0	0	1	1
GO:0043306_positive_regulation_of_mast_cell_degranulation	11	0	0	1	1
GO:0043312_neutrophil_degranulation	482	0	0	1	1
GO:0043330_response_to_exogenous_dsRNA	32	0	0	1	1
GO:0043388_positive_regulation_of_DNA_binding	30	0	0	1	1
GO:0043392_negative_regulation_of_DNA_binding	30	0	0	1	1
GO:0043393_regulation_of_protein_binding	23	0	0	1	1
GO:0043401_steroid_hormone_mediated_signaling_pathway	23	0	0	1	1
GO:0043403_skeletal_muscle_tissue_regeneration	18	0	0	1	1
GO:0043405_regulation_of_MAP_kinase_activity	10	0	0	1	1
GO:0043406_positive_regulation_of_MAP_kinase_activity	59	0	0	1	1
GO:0043407_negative_regulation_of_MAP_kinase_activity	41	0	0	1	1
GO:0043408_regulation_of_MAPK_cascade	23	0	0	1	1
GO:0043409_negative_regulation_of_MAPK_cascade	25	0	0	1	1
GO:0043410_positive_regulation_of_MAPK_cascade	111	0	0	1	1
GO:0043433_negative_regulation_of_DNA-binding_transcription_factor_activity	83	1.2	18.08	0.0572565	1	SFRP4
GO:0043434_response_to_peptide_hormone	48	0	0	1	1
GO:0043473_pigmentation	26	0	0	1	1
GO:0043484_regulation_of_RNA_splicing	42	0	0	1	1
GO:0043486_histone_exchange	10	0	0	1	1
GO:0043488_regulation_of_mRNA_stability	113	0	0	1	1
GO:0043491_protein_kinase_B_signaling	38	0	0	1	1
GO:0043507_positive_regulation_of_JUN_kinase_activity	36	0	0	1	1
GO:0043508_negative_regulation_of_JUN_kinase_activity	16	0	0	1	1
GO:0043517_positive_regulation_of_DNA_damage_response,_signal_transduction_by_p53_class_mediator	12	0	0	1	1
GO:0043518_negative_regulation_of_DNA_damage_response,_signal_transduction_by_p53_class_mediator	15	0	0	1	1
GO:0043523_regulation_of_neuron_apoptotic_process	17	0	0	1	1
GO:0043524_negative_regulation_of_neuron_apoptotic_process	141	0	0	1	1
GO:0043525_positive_regulation_of_neuron_apoptotic_process	55	0	0	1	1
GO:0043536_positive_regulation_of_blood_vessel_endothelial_cell_migration	49	0	0	1	1
GO:0043537_negative_regulation_of_blood_vessel_endothelial_cell_migration	44	0	0	1	1
GO:0043542_endothelial_cell_migration	30	0	0	1	1
GO:0043547_positive_regulation_of_GTPase_activity	313	0.32	4.71	0.200133	1	GRHL3
GO:0043551_regulation_of_phosphatidylinositol_3-kinase_activity	19	0	0	1	1
GO:0043552_positive_regulation_of_phosphatidylinositol_3-kinase_activity	31	0	0	1	1
GO:0043568_positive_regulation_of_insulin-like_growth_factor_receptor_signaling_pathway	13	0	0	1	1
GO:0043586_tongue_development	11	0	0	1	1
GO:0043588_skin_development	35	0	0	1	1
GO:0043589_skin_morphogenesis	11	0	0	1	1
GO:0043627_response_to_estrogen	61	0	0	1	1
GO:0043647_inositol_phosphate_metabolic_process	47	0	0	1	1
GO:0043651_linoleic_acid_metabolic_process	21	0	0	1	1
GO:0043652_engulfment_of_apoptotic_cell	15	0	0	1	1
GO:0043653_mitochondrial_fragmentation_involved_in_apoptotic_process	9	0	0	1	1
GO:0043666_regulation_of_phosphoprotein_phosphatase_activity	43	0	0	1	1
GO:0043687_post-translational_protein_modification	344	0.29	4.28	0.217741	1	SPP1
GO:0043691_reverse_cholesterol_transport	17	0	0	1	1
GO:0043922_negative_regulation_by_host_of_viral_transcription	12	0	0	1	1
GO:0043923_positive_regulation_by_host_of_viral_transcription	17	0	0	1	1
GO:0043928_exonucleolytic_catabolism_of_deadenylated_mRNA	33	0	0	1	1
GO:0043950_positive_regulation_of_cAMP-mediated_signaling	15	0	0	1	1
GO:0043951_negative_regulation_of_cAMP-mediated_signaling	15	0	0	1	1
GO:0043966_histone_H3_acetylation	41	0	0	1	1
GO:0043967_histone_H4_acetylation	38	0	0	1	1
GO:0043968_histone_H2A_acetylation	16	0	0	1	1
GO:0043981_histone_H4-K5_acetylation	16	0	0	1	1
GO:0043982_histone_H4-K8_acetylation	16	0	0	1	1
GO:0043984_histone_H4-K16_acetylation	15	0	0	1	1
GO:0044030_regulation_of_DNA_methylation	17	0	0	1	1
GO:0044154_histone_H3-K14_acetylation	8	0	0	1	1
GO:0044255_cellular_lipid_metabolic_process	15	0	0	1	1
GO:0044257_cellular_protein_catabolic_process	16	0	0	1	1
GO:0044267_cellular_protein_metabolic_process	225	0.44	6.58	0.148078	1	SPP1
GO:0044344_cellular_response_to_fibroblast_growth_factor_stimulus	29	0	0	1	1
GO:0044458_motile_cilium_assembly	23	0	0	1	1
GO:0044539_long-chain_fatty_acid_import_into_cell	8	0	0	1	1
GO:0044597_daunorubicin_metabolic_process	9	0	0	1	1
GO:0044598_doxorubicin_metabolic_process	9	0	0	1	1
GO:0044772_mitotic_cell_cycle_phase_transition	22	0	0	1	1
GO:0044782_cilium_organization	20	0	0	1	1
GO:0044806_G-quadruplex_DNA_unwinding	7	0	0	1	1
GO:0044849_estrous_cycle	15	0	0	1	1
GO:0045010_actin_nucleation	11	0	0	1	1
GO:0045019_negative_regulation_of_nitric_oxide_biosynthetic_process	20	0	0	1	1
GO:0045022_early_endosome_to_late_endosome_transport	22	0	0	1	1
GO:0045039_protein_insertion_into_mitochondrial_inner_membrane	8	0	0	1	1
GO:0045047_protein_targeting_to_ER	12	0	0	1	1
GO:0045055_regulated_exocytosis	20	0	0	1	1
GO:0045056_transcytosis	12	0	0	1	1
GO:0045059_positive_thymic_T_cell_selection	11	0	0	1	1
GO:0045060_negative_thymic_T_cell_selection	11	0	0	1	1
GO:0045070_positive_regulation_of_viral_genome_replication	28	0	0	1	1
GO:0045071_negative_regulation_of_viral_genome_replication	41	0	0	1	1
GO:0045087_innate_immune_response	461	0	0	1	1
GO:0045088_regulation_of_innate_immune_response	21	0	0	1	1
GO:0045089_positive_regulation_of_innate_immune_response	24	0	0	1	1
GO:0045104_intermediate_filament_cytoskeleton_organization	21	0	0	1	1
GO:0045109_intermediate_filament_organization	20	0	0	1	1
GO:0045116_protein_neddylation	13	0	0	1	1
GO:0045165_cell_fate_commitment	55	0	0	1	1
GO:0045176_apical_protein_localization	14	0	0	1	1
GO:0045184_establishment_of_protein_localization	40	0	0	1	1
GO:0045190_isotype_switching	17	0	0	1	1
GO:0045197_establishment_or_maintenance_of_epithelial_cell_apical/basal_polarity	20	0	0	1	1
GO:0045198_establishment_of_epithelial_cell_apical/basal_polarity	15	0	0	1	1
GO:0045199_maintenance_of_epithelial_cell_apical/basal_polarity	11	0	0	1	1
GO:0045214_sarcomere_organization	38	0	0	1	1
GO:0045216_cell-cell_junction_organization	22	0	0	1	1
GO:0045292_mRNA_cis_splicing,_via_spliceosome	29	0	0	1	1
GO:0045329_carnitine_biosynthetic_process	5	0	0	1	1
GO:0045332_phospholipid_translocation	25	0	0	1	1
GO:0045333_cellular_respiration	17	0	0	1	1
GO:0045348_positive_regulation_of_MHC_class_II_biosynthetic_process	10	0	0	1	1
GO:0045429_positive_regulation_of_nitric_oxide_biosynthetic_process	45	0	0	1	1
GO:0045444_fat_cell_differentiation	69	0	0	1	1
GO:0045445_myoblast_differentiation	18	0	0	1	1
GO:0045446_endothelial_cell_differentiation	11	0	0	1	1
GO:0045453_bone_resorption	23	0	0	1	1
GO:0045454_cell_redox_homeostasis	59	0	0	1	1
GO:0045471_response_to_ethanol	99	0	0	1	1
GO:0045475_locomotor_rhythm	12	0	0	1	1
GO:0045494_photoreceptor_cell_maintenance	41	0	0	1	1
GO:0045540_regulation_of_cholesterol_biosynthetic_process	34	0	0	1	1
GO:0045577_regulation_of_B_cell_differentiation	11	0	0	1	1
GO:0045579_positive_regulation_of_B_cell_differentiation	13	0	0	1	1
GO:0045580_regulation_of_T_cell_differentiation	13	0	0	1	1
GO:0045582_positive_regulation_of_T_cell_differentiation	19	0	0	1	1
GO:0045589_regulation_of_regulatory_T_cell_differentiation	15	0	0	1	1
GO:0045591_positive_regulation_of_regulatory_T_cell_differentiation	11	0	0	1	1
GO:0045595_regulation_of_cell_differentiation	34	0	0	1	1
GO:0045596_negative_regulation_of_cell_differentiation	44	2.27	34.49	0.0307509	1	FST
GO:0045597_positive_regulation_of_cell_differentiation	34	0	0	1	1
GO:0045598_regulation_of_fat_cell_differentiation	16	0	0	1	1
GO:0045599_negative_regulation_of_fat_cell_differentiation	51	0	0	1	1
GO:0045600_positive_regulation_of_fat_cell_differentiation	55	0	0	1	1
GO:0045603_positive_regulation_of_endothelial_cell_differentiation	20	0	0	1	1
GO:0045616_regulation_of_keratinocyte_differentiation	17	0	0	1	1
GO:0045618_positive_regulation_of_keratinocyte_differentiation	20	0	0	1	1
GO:0045638_negative_regulation_of_myeloid_cell_differentiation	18	0	0	1	1
GO:0045648_positive_regulation_of_erythrocyte_differentiation	33	0	0	1	1
GO:0045651_positive_regulation_of_macrophage_differentiation	14	0	0	1	1
GO:0045652_regulation_of_megakaryocyte_differentiation	70	0	0	1	1
GO:0045653_negative_regulation_of_megakaryocyte_differentiation	18	0	0	1	1
GO:0045657_positive_regulation_of_monocyte_differentiation	11	0	0	1	1
GO:0045662_negative_regulation_of_myoblast_differentiation	24	0	0	1	1
GO:0045663_positive_regulation_of_myoblast_differentiation	22	0	0	1	1
GO:0045664_regulation_of_neuron_differentiation	26	0	0	1	1
GO:0045665_negative_regulation_of_neuron_differentiation	59	0	0	1	1
GO:0045666_positive_regulation_of_neuron_differentiation	85	0	0	1	1
GO:0045667_regulation_of_osteoblast_differentiation	13	0	0	1	1
GO:0045668_negative_regulation_of_osteoblast_differentiation	53	0	0	1	1
GO:0045669_positive_regulation_of_osteoblast_differentiation	63	0	0	1	1
GO:0045670_regulation_of_osteoclast_differentiation	11	0	0	1	1
GO:0045671_negative_regulation_of_osteoclast_differentiation	25	0	0	1	1
GO:0045672_positive_regulation_of_osteoclast_differentiation	23	0	0	1	1
GO:0045717_negative_regulation_of_fatty_acid_biosynthetic_process	17	0	0	1	1
GO:0045721_negative_regulation_of_gluconeogenesis	18	0	0	1	1
GO:0045722_positive_regulation_of_gluconeogenesis	17	0	0	1	1
GO:0045723_positive_regulation_of_fatty_acid_biosynthetic_process	14	0	0	1	1
GO:0045724_positive_regulation_of_cilium_assembly	15	0	0	1	1
GO:0045725_positive_regulation_of_glycogen_biosynthetic_process	16	0	0	1	1
GO:0045727_positive_regulation_of_translation	76	0	0	1	1
GO:0045730_respiratory_burst	13	0	0	1	1
GO:0045732_positive_regulation_of_protein_catabolic_process	72	0	0	1	1
GO:0045736_negative_regulation_of_cyclin-dependent_protein_serine/threonine_kinase_activity	33	0	0	1	1
GO:0045737_positive_regulation_of_cyclin-dependent_protein_serine/threonine_kinase_activity	30	0	0	1	1
GO:0045739_positive_regulation_of_DNA_repair	31	0	0	1	1
GO:0045740_positive_regulation_of_DNA_replication	29	0	0	1	1
GO:0045744_negative_regulation_of_G_protein-coupled_receptor_signaling_pathway	14	0	0	1	1
GO:0045745_positive_regulation_of_G_protein-coupled_receptor_signaling_pathway	14	0	0	1	1
GO:0045746_negative_regulation_of_Notch_signaling_pathway	39	0	0	1	1
GO:0045747_positive_regulation_of_Notch_signaling_pathway	54	0	0	1	1
GO:0045765_regulation_of_angiogenesis	33	0	0	1	1
GO:0045766_positive_regulation_of_angiogenesis	152	0	0	1	1
GO:0045773_positive_regulation_of_axon_extension	34	0	0	1	1
GO:0045776_negative_regulation_of_blood_pressure	27	0	0	1	1
GO:0045777_positive_regulation_of_blood_pressure	20	0	0	1	1
GO:0045778_positive_regulation_of_ossification	13	0	0	1	1
GO:0045779_negative_regulation_of_bone_resorption	15	0	0	1	1
GO:0045785_positive_regulation_of_cell_adhesion	48	0	0	1	1
GO:0045786_negative_regulation_of_cell_cycle	42	0	0	1	1
GO:0045787_positive_regulation_of_cell_cycle	37	0	0	1	1
GO:0045806_negative_regulation_of_endocytosis	15	0	0	1	1
GO:0045807_positive_regulation_of_endocytosis	21	0	0	1	1
GO:0045814_negative_regulation_of_gene_expression,_epigenetic	55	0	0	1	1
GO:0045815_positive_regulation_of_gene_expression,_epigenetic	32	0	0	1	1
GO:0045820_negative_regulation_of_glycolytic_process	14	0	0	1	1
GO:0045821_positive_regulation_of_glycolytic_process	24	0	0	1	1
GO:0045824_negative_regulation_of_innate_immune_response	16	0	0	1	1
GO:0045830_positive_regulation_of_isotype_switching	12	0	0	1	1
GO:0045842_positive_regulation_of_mitotic_metaphase/anaphase_transition	12	0	0	1	1
GO:0045859_regulation_of_protein_kinase_activity	19	0	0	1	1
GO:0045860_positive_regulation_of_protein_kinase_activity	53	0	0	1	1
GO:0045861_negative_regulation_of_proteolysis	22	0	0	1	1
GO:0045862_positive_regulation_of_proteolysis	20	0	0	1	1
GO:0045869_negative_regulation_of_single_stranded_viral_RNA_replication_via_double_stranded_DNA_intermediate	16	0	0	1	1
GO:0045879_negative_regulation_of_smoothened_signaling_pathway	27	0	0	1	1
GO:0045880_positive_regulation_of_smoothened_signaling_pathway	37	0	0	1	1
GO:0045892_negative_regulation_of_transcription,_DNA-templated	528	0.38	5.87	0.0531274	1	CRYAB;SAMD11
GO:0045893_positive_regulation_of_transcription,_DNA-templated	558	0.18	2.62	0.329649	1	SPP1
GO:0045899_positive_regulation_of_RNA_polymerase_II_transcription_preinitiation_complex_assembly	11	0	0	1	1
GO:0045907_positive_regulation_of_vasoconstriction	31	0	0	1	1
GO:0045910_negative_regulation_of_DNA_recombination	15	0	0	1	1
GO:0045921_positive_regulation_of_exocytosis	23	0	0	1	1
GO:0045926_negative_regulation_of_growth	17	0	0	1	1
GO:0045930_negative_regulation_of_mitotic_cell_cycle	34	0	0	1	1
GO:0045931_positive_regulation_of_mitotic_cell_cycle	31	0	0	1	1
GO:0045943_positive_regulation_of_transcription_by_RNA_polymerase_I	11	0	0	1	1
GO:0045944_positive_regulation_of_transcription_by_RNA_polymerase_II	1124	0.09	1.27	0.557109	1	GRHL3
GO:0045945_positive_regulation_of_transcription_by_RNA_polymerase_III	11	0	0	1	1
GO:0045947_negative_regulation_of_translational_initiation	14	0	0	1	1
GO:0045948_positive_regulation_of_translational_initiation	22	0	0	1	1
GO:0045953_negative_regulation_of_natural_killer_cell_mediated_cytotoxicity	10	0	0	1	1
GO:0045954_positive_regulation_of_natural_killer_cell_mediated_cytotoxicity	22	0	0	1	1
GO:0045956_positive_regulation_of_calcium_ion-dependent_exocytosis	16	0	0	1	1
GO:0045987_positive_regulation_of_smooth_muscle_contraction	16	0	0	1	1
GO:0045995_regulation_of_embryonic_development	19	0	0	1	1
GO:0046007_negative_regulation_of_activated_T_cell_proliferation	14	0	0	1	1
GO:0046034_ATP_metabolic_process	33	0	0	1	1
GO:0046039_GTP_metabolic_process	14	0	0	1	1
GO:0046135_pyrimidine_nucleoside_catabolic_process	11	0	0	1	1
GO:0046325_negative_regulation_of_glucose_import	16	0	0	1	1
GO:0046326_positive_regulation_of_glucose_import	39	0	0	1	1
GO:0046328_regulation_of_JNK_cascade	15	0	0	1	1
GO:0046329_negative_regulation_of_JNK_cascade	29	0	0	1	1
GO:0046330_positive_regulation_of_JNK_cascade	80	0	0	1	1
GO:0046339_diacylglycerol_metabolic_process	14	0	0	1	1
GO:0046426_negative_regulation_of_receptor_signaling_pathway_via_JAK-STAT	16	0	0	1	1
GO:0046427_positive_regulation_of_receptor_signaling_pathway_via_JAK-STAT	30	0	0	1	1
GO:0046470_phosphatidylcholine_metabolic_process	16	0	0	1	1
GO:0046475_glycerophospholipid_catabolic_process	15	0	0	1	1
GO:0046486_glycerolipid_metabolic_process	11	0	0	1	1
GO:0046512_sphingosine_biosynthetic_process	14	0	0	1	1
GO:0046513_ceramide_biosynthetic_process	32	0	0	1	1
GO:0046514_ceramide_catabolic_process	6	0	0	1	1
GO:0046549_retinal_cone_cell_development	11	0	0	1	1
GO:0046579_positive_regulation_of_Ras_protein_signal_transduction	32	0	0	1	1
GO:0046580_negative_regulation_of_Ras_protein_signal_transduction	26	0	0	1	1
GO:0046596_regulation_of_viral_entry_into_host_cell	15	0	0	1	1
GO:0046597_negative_regulation_of_viral_entry_into_host_cell	18	0	0	1	1
GO:0046599_regulation_of_centriole_replication	10	0	0	1	1
GO:0046622_positive_regulation_of_organ_growth	11	0	0	1	1
GO:0046626_regulation_of_insulin_receptor_signaling_pathway	13	0	0	1	1
GO:0046627_negative_regulation_of_insulin_receptor_signaling_pathway	33	0	0	1	1
GO:0046628_positive_regulation_of_insulin_receptor_signaling_pathway	24	0	0	1	1
GO:0046654_tetrahydrofolate_biosynthetic_process	5	0	0	1	1
GO:0046655_folic_acid_metabolic_process	19	0	0	1	1
GO:0046676_negative_regulation_of_insulin_secretion	29	0	0	1	1
GO:0046677_response_to_antibiotic	29	0	0	1	1
GO:0046685_response_to_arsenic-containing_substance	13	0	0	1	1
GO:0046686_response_to_cadmium_ion	25	0	0	1	1
GO:0046688_response_to_copper_ion	14	0	0	1	1
GO:0046716_muscle_cell_cellular_homeostasis	21	0	0	1	1
GO:0046718_viral_entry_into_host_cell	88	0	0	1	1
GO:0046755_viral_budding	9	0	0	1	1
GO:0046777_protein_autophosphorylation	171	0	0	1	1
GO:0046785_microtubule_polymerization	13	0	0	1	1
GO:0046827_positive_regulation_of_protein_export_from_nucleus	20	0	0	1	1
GO:0046834_lipid_phosphorylation	15	0	0	1	1
GO:0046835_carbohydrate_phosphorylation	22	0	0	1	1
GO:0046839_phospholipid_dephosphorylation	14	0	0	1	1
GO:0046847_filopodium_assembly	18	0	0	1	1
GO:0046849_bone_remodeling	16	0	0	1	1
[truncated: 907 more rows]

## Sheet: CC_8hrs - ORA_T4Mt8_vs_NIt8-CC_
ORA_T4Mt8_vs_NIt8-CC_all
geneset	NGenes	pctDE	OR	pvalue	FDR	external_gene_name.DE
GO:0031410_cytoplasmic_vesicle	289	1.38	24.76	4.51992e-05	0.0284755	PDPN;TGFA;ACSBG1;HAP1
GO:0005576_extracellular_region	1802	0.28	4.96	0.00717737	0.565218	SPP1;PRSS35;S1PR3;TGFA;FST
GO:0005615_extracellular_space	1724	0.29	5.21	0.00595657	0.565218	SPP1;SECTM1;TGFA;FST;SFRP4
GO:0032432_actin_filament_bundle	10	10	164.44	0.00706895	0.565218	CRYAB
GO:0042995_cell_projection	127	1.57	25.08	0.0036148	0.565218	SPP1;PDPN
GO:0043197_dendritic_spine	162	1.23	19.56	0.00580555	0.565218	CRYAB;HAP1
GO:0043204_perikaryon	156	1.28	20.33	0.00539581	0.565218	CRYAB;GLRA1
GO:0071437_invadopodium	10	10	164.44	0.00706895	0.565218	PDPN
GO:0009986_cell_surface	595	0.5	8.29	0.00809728	0.56681	TGFA;CRYAB;SFRP4
GO:0016323_basolateral_plasma_membrane	215	0.93	14.67	0.0100153	0.573604	PDPN;TGFA
GO:0060077_inhibitory_synapse	14	7.14	113.98	0.00988325	0.573604	GLRA1
GO:0016234_inclusion_body	20	5	78.08	0.0140905	0.639831	HAP1
GO:0031258_lamellipodium_membrane	22	4.55	70.49	0.0154892	0.639831	PDPN
GO:0031430_M_band	25	4	61.8	0.0175837	0.639831	CRYAB
GO:0031527_filopodium_membrane	18	5.56	87.21	0.01269	0.639831	PDPN
GO:0031528_microvillus_membrane	26	3.85	59.34	0.0182809	0.639831	PDPN
GO:0044305_calyx_of_Held	24	4.17	64.39	0.016886	0.639831	GLRA1
GO:0099060_integral_component_of_postsynaptic_specialization_membrane	25	4	61.8	0.0175837	0.639831	GLRA1
GO:0097060_synaptic_membrane	28	3.57	54.96	0.0196739	0.652346	CRYAB
GO:0005783_endoplasmic_reticulum	1022	0.29	4.74	0.0339743	0.951428	ACSBG1;GLRA1;HAP1
GO:0005794_Golgi_apparatus	1002	0.3	4.84	0.0323039	0.951428	SPP1;SECTM1;CRYAB
GO:0012507_ER_to_Golgi_transport_vesicle_membrane	52	1.92	29.09	0.0362449	0.951428	TGFA
GO:0030425_dendrite	420	0.48	7.42	0.03515	0.951428	GLRA1;HAP1
GO:0034707_chloride_channel_complex	48	2.08	31.56	0.0335016	0.951428	GLRA1
GO:0030665_clathrin-coated_vesicle_membrane	56	1.79	26.98	0.0389808	0.957317	TGFA
GO:0099056_integral_component_of_presynaptic_membrane	59	1.69	25.59	0.0410279	0.957317	GLRA1
GO:1904115_axon_cytoplasm	57	1.75	26.5	0.0396636	0.957317	HAP1
GO:0000118_histone_deacetylase_complex	44	0	0	1	1
GO:0000123_histone_acetyltransferase_complex	24	0	0	1	1
GO:0000124_SAGA_complex	12	0	0	1	1
GO:0000127_transcription_factor_TFIIIC_complex	6	0	0	1	1
GO:0000137_Golgi_cis_cisterna	29	0	0	1	1
GO:0000139_Golgi_membrane	617	0.32	5	0.0699274	1	TGFA;LDLRAD4
GO:0000145_exocyst	19	0	0	1	1
GO:0000151_ubiquitin_ligase_complex	107	0	0	1	1
GO:0000159_protein_phosphatase_type_2A_complex	19	0	0	1	1
GO:0000164_protein_phosphatase_type_1_complex	15	0	0	1	1
GO:0000172_ribonuclease_MRP_complex	9	0	0	1	1
GO:0000176_nuclear_exosome_(RNase_complex)	16	0	0	1	1
GO:0000177_cytoplasmic_exosome_(RNase_complex)	12	0	0	1	1
GO:0000178_exosome_(RNase_complex)	18	0	0	1	1
GO:0000228_nuclear_chromosome	52	0	0	1	1
GO:0000242_pericentriolar_material	21	0	0	1	1
GO:0000307_cyclin-dependent_protein_kinase_holoenzyme_complex	30	0	0	1	1
GO:0000346_transcription_export_complex	13	0	0	1	1
GO:0000407_phagophore_assembly_site	23	0	0	1	1
GO:0000421_autophagosome_membrane	33	0	0	1	1
GO:0000439_transcription_factor_TFIIH_core_complex	12	0	0	1	1
GO:0000445_THO_complex_part_of_transcription_export_complex	6	0	0	1	1
GO:0000502_proteasome_complex	56	0	0	1	1
GO:0000506_glycosylphosphatidylinositol-N-acetylglucosaminyltransferase_(GPI-GnT)_complex	8	0	0	1	1
GO:0000775_chromosome,_centromeric_region	52	0	0	1	1
GO:0000776_kinetochore	87	0	0	1	1
GO:0000777_condensed_chromosome_kinetochore	86	0	0	1	1
GO:0000778_condensed_nuclear_chromosome_kinetochore	11	0	0	1	1
GO:0000780_condensed_nuclear_chromosome,_centromeric_region	18	0	0	1	1
GO:0000781_chromosome,_telomeric_region	56	0	0	1	1
GO:0000783_nuclear_telomere_cap_complex	9	0	0	1	1
GO:0000784_nuclear_chromosome,_telomeric_region	124	0	0	1	1
GO:0000785_chromatin	126	0	0	1	1
GO:0000786_nucleosome	94	0	0	1	1
GO:0000788_nuclear_nucleosome	39	0	0	1	1
GO:0000790_nuclear_chromatin	1190	0.08	1.2	0.578256	1	GRHL3
GO:0000792_heterochromatin	27	0	0	1	1
GO:0000793_condensed_chromosome	26	0	0	1	1
GO:0000794_condensed_nuclear_chromosome	28	0	0	1	1
GO:0000795_synaptonemal_complex	28	0	0	1	1
GO:0000800_lateral_element	14	0	0	1	1
GO:0000801_central_element	8	0	0	1	1
GO:0000812_Swr1_complex	12	0	0	1	1
GO:0000813_ESCRT_I_complex	10	0	0	1	1
GO:0000815_ESCRT_III_complex	10	0	0	1	1
GO:0000922_spindle_pole	121	0	0	1	1
GO:0000930_gamma-tubulin_complex	15	0	0	1	1
GO:0000932_P-body	88	0	0	1	1
GO:0000940_condensed_chromosome_outer_kinetochore	10	0	0	1	1
GO:0000974_Prp19_complex	13	0	0	1	1
GO:0001401_SAM_complex	13	0	0	1	1
GO:0001518_voltage-gated_sodium_channel_complex	17	0	0	1	1
GO:0001527_microfibril	10	0	0	1	1
GO:0001533_cornified_envelope	45	0	0	1	1
GO:0001650_fibrillar_center	129	0	0	1	1
GO:0001669_acrosomal_vesicle	94	0	0	1	1
GO:0001673_male_germ_cell_nucleus	14	0	0	1	1
GO:0001725_stress_fiber	68	0	0	1	1
GO:0001726_ruffle	98	1.02	15.27	0.0672669	1	PDPN
GO:0001741_XY_body	13	0	0	1	1
GO:0001750_photoreceptor_outer_segment	64	0	0	1	1
GO:0001772_immunological_synapse	39	0	0	1	1
GO:0001891_phagocytic_cup	27	0	0	1	1
GO:0001917_photoreceptor_inner_segment	59	0	0	1	1
GO:0001931_uropod	12	0	0	1	1
GO:0002080_acrosomal_membrane	22	0	0	1	1
GO:0002102_podosome	28	0	0	1	1
GO:0002116_semaphorin_receptor_complex	11	0	0	1	1
GO:0002177_manchette	11	0	0	1	1
GO:0005575_cellular_component	434	0	0	1	1
GO:0005581_collagen_trimer	60	0	0	1	1
GO:0005604_basement_membrane	93	0	0	1	1
GO:0005614_interstitial_matrix	13	0	0	1	1
GO:0005622_intracellular	122	0.82	12.23	0.0830744	1	HPCAL4
GO:0005634_nucleus	5127	0.1	1.51	0.291625	1	GRHL3;CRYAB;FST;SAMD11;SFRP4
GO:0005635_nuclear_envelope	183	0	0	1	1
GO:0005637_nuclear_inner_membrane	48	0	0	1	1
GO:0005639_integral_component_of_nuclear_inner_membrane	15	0	0	1	1
GO:0005640_nuclear_outer_membrane	27	0	0	1	1
GO:0005643_nuclear_pore	65	0	0	1	1
GO:0005654_nucleoplasm	3680	0.08	1.18	0.495194	1	GRHL3;CRYAB;SEL1L3
GO:0005657_replication_fork	26	0	0	1	1
GO:0005662_DNA_replication_factor_A_complex	15	0	0	1	1
GO:0005664_nuclear_origin_of_replication_recognition_complex	9	0	0	1	1
GO:0005665_RNA_polymerase_II,_core_complex	15	0	0	1	1
GO:0005666_RNA_polymerase_III_complex	18	0	0	1	1
GO:0005667_transcription_regulator_complex	209	0	0	1	1
GO:0005669_transcription_factor_TFIID_complex	33	0	0	1	1
GO:0005671_Ada2/Gcn5/Ada3_transcription_activator_complex	15	0	0	1	1
GO:0005675_transcription_factor_TFIIH_holo_complex	13	0	0	1	1
GO:0005680_anaphase-promoting_complex	22	0	0	1	1
GO:0005681_spliceosomal_complex	91	0	0	1	1
GO:0005682_U5_snRNP	21	0	0	1	1
GO:0005684_U2-type_spliceosomal_complex	12	0	0	1	1
GO:0005685_U1_snRNP	33	0	0	1	1
GO:0005686_U2_snRNP	21	0	0	1	1
GO:0005687_U4_snRNP	12	0	0	1	1
GO:0005688_U6_snRNP	13	0	0	1	1
GO:0005689_U12-type_spliceosomal_complex	28	0	0	1	1
GO:0005694_chromosome	130	0	0	1	1
GO:0005697_telomerase_holoenzyme_complex	21	0	0	1	1
GO:0005719_nuclear_euchromatin	34	0	0	1	1
GO:0005720_nuclear_heterochromatin	22	0	0	1	1
GO:0005721_pericentric_heterochromatin	14	0	0	1	1
GO:0005730_nucleolus	1245	0.08	1.14	0.595144	1	HAP1
GO:0005736_RNA_polymerase_I_complex	13	0	0	1	1
GO:0005737_cytoplasm	4690	0.13	2.18	0.0996805	1	S1PR3;ACSBG1;CRYAB;FST;HAP1;SFRP4
GO:0005739_mitochondrion	1266	0.16	2.37	0.225636	1	CRYAB;HAP1
GO:0005741_mitochondrial_outer_membrane	166	0	0	1	1
GO:0005742_mitochondrial_outer_membrane_translocase_complex	9	0	0	1	1
GO:0005743_mitochondrial_inner_membrane	400	0	0	1	1
GO:0005744_TIM23_mitochondrial_import_inner_membrane_translocase_complex	10	0	0	1	1
GO:0005746_mitochondrial_respirasome	15	0	0	1	1
GO:0005747_mitochondrial_respiratory_chain_complex_I	50	0	0	1	1
GO:0005750_mitochondrial_respiratory_chain_complex_III	13	0	0	1	1
GO:0005751_mitochondrial_respiratory_chain_complex_IV	12	0	0	1	1
GO:0005753_mitochondrial_proton-transporting_ATP_synthase_complex	18	0	0	1	1
GO:0005758_mitochondrial_intermembrane_space	78	0	0	1	1
GO:0005759_mitochondrial_matrix	371	0	0	1	1
GO:0005761_mitochondrial_ribosome	24	0	0	1	1
GO:0005762_mitochondrial_large_ribosomal_subunit	57	0	0	1	1
GO:0005763_mitochondrial_small_ribosomal_subunit	28	0	0	1	1
GO:0005764_lysosome	261	0.38	5.67	0.16975	1	HAP1
GO:0005765_lysosomal_membrane	315	0	0	1	1
GO:0005768_endosome	294	0	0	1	1
GO:0005769_early_endosome	264	0.38	5.6	0.171532	1	HAP1
GO:0005770_late_endosome	138	0	0	1	1
GO:0005771_multivesicular_body	42	0	0	1	1
GO:0005773_vacuole	15	0	0	1	1
GO:0005774_vacuolar_membrane	21	0	0	1	1
GO:0005776_autophagosome	69	1.45	21.81	0.0478217	1	HAP1
GO:0005777_peroxisome	106	0	0	1	1
GO:0005778_peroxisomal_membrane	57	0	0	1	1
GO:0005779_integral_component_of_peroxisomal_membrane	15	0	0	1	1
GO:0005782_peroxisomal_matrix	52	0	0	1	1
GO:0005786_signal_recognition_particle,_endoplasmic_reticulum_targeting	14	0	0	1	1
GO:0005788_endoplasmic_reticulum_lumen	299	0.33	4.94	0.192058	1	SPP1
GO:0005789_endoplasmic_reticulum_membrane	944	0.11	1.52	0.494211	1	TGFA
GO:0005790_smooth_endoplasmic_reticulum	27	0	0	1	1
GO:0005791_rough_endoplasmic_reticulum	55	0	0	1	1
GO:0005793_endoplasmic_reticulum-Golgi_intermediate_compartment	77	0	0	1	1
GO:0005795_Golgi_stack	37	0	0	1	1
GO:0005796_Golgi_lumen	102	0	0	1	1
GO:0005797_Golgi_medial_cisterna	10	0	0	1	1
GO:0005798_Golgi-associated_vesicle	17	0	0	1	1
GO:0005801_cis-Golgi_network	65	0	0	1	1
GO:0005802_trans-Golgi_network	172	0	0	1	1
GO:0005811_lipid_droplet	93	0	0	1	1
GO:0005813_centrosome	506	0.2	2.89	0.303944	1	HAP1
GO:0005814_centriole	143	0.7	10.42	0.0966974	1	HAP1
GO:0005815_microtubule_organizing_center	96	0	0	1	1
GO:0005819_spindle	122	0	0	1	1
GO:0005829_cytosol	5138	0.08	1.12	0.508371	1	PDPN;ACSBG1;CRYAB;HAP1
GO:0005832_chaperonin-containing_T-complex	10	0	0	1	1
GO:0005833_hemoglobin_complex	12	0	0	1	1
GO:0005834_heterotrimeric_G-protein_complex	34	0	0	1	1
GO:0005839_proteasome_core_complex	20	0	0	1	1
GO:0005840_ribosome	67	0	0	1	1
GO:0005844_polysome	40	0	0	1	1
GO:0005845_mRNA_cap_binding_complex	11	0	0	1	1
GO:0005847_mRNA_cleavage_and_polyadenylation_specificity_factor_complex	18	0	0	1	1
GO:0005851_eukaryotic_translation_initiation_factor_2B_complex	6	0	0	1	1
GO:0005852_eukaryotic_translation_initiation_factor_3_complex	17	0	0	1	1
GO:0005856_cytoskeleton	406	0.25	3.62	0.251863	1	HAP1
GO:0005858_axonemal_dynein_complex	11	0	0	1	1
GO:0005859_muscle_myosin_complex	15	0	0	1	1
GO:0005861_troponin_complex	9	0	0	1	1
GO:0005865_striated_muscle_thin_filament	10	0	0	1	1
GO:0005868_cytoplasmic_dynein_complex	21	0	0	1	1
GO:0005869_dynactin_complex	16	0	0	1	1
GO:0005871_kinesin_complex	48	0	0	1	1
GO:0005874_microtubule	305	0	0	1	1
GO:0005875_microtubule_associated_complex	32	0	0	1	1
GO:0005876_spindle_microtubule	45	0	0	1	1
GO:0005881_cytoplasmic_microtubule	60	0	0	1	1
GO:0005882_intermediate_filament	107	0	0	1	1
GO:0005884_actin_filament	86	0	0	1	1
GO:0005885_Arp2/3_protein_complex	11	0	0	1	1
GO:0005886_plasma_membrane	4416	0.14	2.34	0.0787429	1	S1PR3;SECTM1;PDPN;TGFA;ACSBG1;GLRA1
GO:0005887_integral_component_of_plasma_membrane	1389	0.22	3.43	0.0724704	1	S1PR3;PDPN;GLRA1
GO:0005890_sodium:potassium-exchanging_ATPase_complex	12	0	0	1	1
GO:0005891_voltage-gated_calcium_channel_complex	27	0	0	1	1
GO:0005892_acetylcholine-gated_channel_complex	16	0	0	1	1
GO:0005901_caveola	75	0	0	1	1
GO:0005902_microvillus	70	0	0	1	1
GO:0005903_brush_border	55	0	0	1	1
GO:0005905_clathrin-coated_pit	59	0	0	1	1
GO:0005911_cell-cell_junction	187	0	0	1	1
GO:0005912_adherens_junction	157	0	0	1	1
GO:0005921_gap_junction	19	0	0	1	1
GO:0005922_connexin_complex	21	0	0	1	1
GO:0005923_bicellular_tight_junction	122	0	0	1	1
GO:0005925_focal_adhesion	415	0	0	1	1
GO:0005929_cilium	209	0	0	1	1
GO:0005930_axoneme	104	0	0	1	1
GO:0005938_cell_cortex	142	0	0	1	1
GO:0005940_septin_ring	14	0	0	1	1
GO:0005942_phosphatidylinositol_3-kinase_complex	22	0	0	1	1
GO:0005952_cAMP-dependent_protein_kinase_complex	10	0	0	1	1
GO:0008021_synaptic_vesicle	131	0.76	11.38	0.0889365	1	HAP1
GO:0008023_transcription_elongation_factor_complex	22	0	0	1	1
GO:0008076_voltage-gated_potassium_channel_complex	85	0	0	1	1
GO:0008180_COP9_signalosome	36	0	0	1	1
GO:0008250_oligosaccharyltransferase_complex	12	0	0	1	1
GO:0008274_gamma-tubulin_ring_complex	8	0	0	1	1
GO:0008278_cohesin_complex	10	0	0	1	1
GO:0008305_integrin_complex	25	0	0	1	1
GO:0008328_ionotropic_glutamate_receptor_complex	12	0	0	1	1
GO:0008385_IkappaB_kinase_complex	9	0	0	1	1
GO:0008540_proteasome_regulatory_particle,_base_subcomplex	12	0	0	1	1
GO:0009897_external_side_of_plasma_membrane	303	0.33	4.87	0.194373	1	GLRA1
GO:0009898_cytoplasmic_side_of_plasma_membrane	52	0	0	1	1
GO:0009925_basal_plasma_membrane	51	0	0	1	1
GO:0010008_endosome_membrane	222	0	0	1	1
GO:0010369_chromocenter	13	0	0	1	1
GO:0010494_cytoplasmic_stress_granule	74	0	0	1	1
GO:0012505_endomembrane_system	125	0	0	1	1
GO:0012506_vesicle_membrane	30	0	0	1	1
GO:0014069_postsynaptic_density	252	0.4	5.87	0.164381	1	CRYAB
GO:0014701_junctional_sarcoplasmic_reticulum_membrane	9	0	0	1	1
GO:0014704_intercalated_disc	46	0	0	1	1
GO:0015030_Cajal_body	71	0	0	1	1
GO:0015629_actin_cytoskeleton	245	0.41	6.04	0.160183	1	HAP1
GO:0015630_microtubule_cytoskeleton	158	0.63	9.42	0.106311	1	CRYAB
GO:0015935_small_ribosomal_subunit	20	0	0	1	1
GO:0016010_dystrophin-associated_glycoprotein_complex	17	0	0	1	1
GO:0016020_membrane	2109	0.05	0.65	0.789449	1	PDPN
GO:0016021_integral_component_of_membrane	3570	0.14	2.33	0.0981562	1	SECTM1;TGFA;LDLRAD4;GLRA1;SEL1L3
GO:0016235_aggresome	39	0	0	1	1
GO:0016281_eukaryotic_translation_initiation_factor_4F_complex	13	0	0	1	1
GO:0016282_eukaryotic_43S_preinitiation_complex	17	0	0	1	1
GO:0016324_apical_plasma_membrane	353	0.28	4.17	0.222784	1	PDPN
GO:0016327_apicolateral_plasma_membrane	19	0	0	1	1
GO:0016328_lateral_plasma_membrane	65	0	0	1	1
GO:0016342_catenin_complex	31	0	0	1	1
GO:0016363_nuclear_matrix	109	0	0	1	1
GO:0016442_RISC_complex	16	0	0	1	1
GO:0016459_myosin_complex	32	0	0	1	1
GO:0016471_vacuolar_proton-transporting_V-type_ATPase_complex	14	0	0	1	1
GO:0016514_SWI/SNF_complex	19	0	0	1	1
GO:0016529_sarcoplasmic_reticulum	44	0	0	1	1
GO:0016580_Sin3_complex	13	0	0	1	1
GO:0016581_NuRD_complex	15	0	0	1	1
GO:0016591_RNA_polymerase_II,_holoenzyme	7	0	0	1	1
GO:0016592_mediator_complex	41	0	0	1	1
GO:0016593_Cdc73/Paf1_complex	8	0	0	1	1
GO:0016600_flotillin_complex	8	0	0	1	1
GO:0016604_nuclear_body	312	0	0	1	1
GO:0016605_PML_body	101	0	0	1	1
GO:0016607_nuclear_speck	400	0	0	1	1
GO:0017053_transcription_repressor_complex	54	0	0	1	1
GO:0017101_aminoacyl-tRNA_synthetase_multienzyme_complex	11	0	0	1	1
GO:0017119_Golgi_transport_complex	13	0	0	1	1
GO:0017146_NMDA_selective_glutamate_receptor_complex	11	0	0	1	1
GO:0019005_SCF_ubiquitin_ligase_complex	63	0	0	1	1
GO:0019773_proteasome_core_complex,_alpha-subunit_complex	8	0	0	1	1
GO:0019774_proteasome_core_complex,_beta-subunit_complex	11	0	0	1	1
GO:0019814_immunoglobulin_complex	0	NA	0	1	1
GO:0019897_extrinsic_component_of_plasma_membrane	23	0	0	1	1
GO:0019898_extrinsic_component_of_membrane	68	0	0	1	1
GO:0022624_proteasome_accessory_complex	17	0	0	1	1
GO:0022625_cytosolic_large_ribosomal_subunit	56	0	0	1	1
GO:0022627_cytosolic_small_ribosomal_subunit	46	0	0	1	1
GO:0030008_TRAPP_complex	15	0	0	1	1
GO:0030014_CCR4-NOT_complex	16	0	0	1	1
GO:0030016_myofibril	29	0	0	1	1
GO:0030017_sarcomere	46	0	0	1	1
GO:0030018_Z_disc	128	0.78	11.65	0.0869864	1	CRYAB
GO:0030027_lamellipodium	185	0.54	8.03	0.12337	1	PDPN
GO:0030054_cell_junction	192	0.52	7.73	0.127743	1	PDPN
GO:0030057_desmosome	25	0	0	1	1
GO:0030122_AP-2_adaptor_complex	11	0	0	1	1
GO:0030126_COPI_vesicle_coat	13	0	0	1	1
GO:0030127_COPII_vesicle_coat	15	0	0	1	1
GO:0030133_transport_vesicle	92	0	0	1	1
GO:0030134_COPII-coated_ER_to_Golgi_transport_vesicle	41	0	0	1	1
GO:0030136_clathrin-coated_vesicle	59	0	0	1	1
GO:0030137_COPI-coated_vesicle	11	0	0	1	1
GO:0030139_endocytic_vesicle	62	0	0	1	1
GO:0030140_trans-Golgi_network_transport_vesicle	17	0	0	1	1
GO:0030141_secretory_granule	91	0	0	1	1
GO:0030173_integral_component_of_Golgi_membrane	61	0	0	1	1
GO:0030175_filopodium	72	1.39	20.88	0.0498509	1	PDPN
GO:0030176_integral_component_of_endoplasmic_reticulum_membrane	111	0	0	1	1
GO:0030285_integral_component_of_synaptic_vesicle_membrane	34	0	0	1	1
GO:0030286_dynein_complex	25	0	0	1	1
GO:0030315_T-tubule	45	0	0	1	1
GO:0030424_axon	311	0.32	4.74	0.198984	1	CRYAB
GO:0030426_growth_cone	140	0.71	10.64	0.0947631	1	HAP1
GO:0030496_midbody	161	0	0	1	1
GO:0030532_small_nuclear_ribonucleoprotein_complex	14	0	0	1	1
GO:0030658_transport_vesicle_membrane	40	0	0	1	1
GO:0030659_cytoplasmic_vesicle_membrane	144	0	0	1	1
GO:0030660_Golgi-associated_vesicle_membrane	19	0	0	1	1
GO:0030666_endocytic_vesicle_membrane	66	0	0	1	1
GO:0030667_secretory_granule_membrane	99	0	0	1	1
GO:0030669_clathrin-coated_endocytic_vesicle_membrane	31	0	0	1	1
GO:0030670_phagocytic_vesicle_membrane	74	0	0	1	1
GO:0030672_synaptic_vesicle_membrane	68	0	0	1	1
GO:0030673_axolemma	15	0	0	1	1
GO:0030681_multimeric_ribonuclease_P_complex	10	0	0	1	1
GO:0030686_90S_preribosome	12	0	0	1	1
GO:0030687_preribosome,_large_subunit_precursor	22	0	0	1	1
GO:0030688_preribosome,_small_subunit_precursor	13	0	0	1	1
GO:0030863_cortical_cytoskeleton	20	0	0	1	1
GO:0030864_cortical_actin_cytoskeleton	53	0	0	1	1
GO:0030867_rough_endoplasmic_reticulum_membrane	10	0	0	1	1
GO:0030870_Mre11_complex	7	0	0	1	1
GO:0030877_beta-catenin_destruction_complex	12	0	0	1	1
GO:0030897_HOPS_complex	12	0	0	1	1
GO:0030904_retromer_complex	21	0	0	1	1
GO:0030914_STAGA_complex	12	0	0	1	1
GO:0030915_Smc5-Smc6_complex	7	0	0	1	1
GO:0030991_intraciliary_transport_particle_A	7	0	0	1	1
GO:0030992_intraciliary_transport_particle_B	19	0	0	1	1
GO:0031011_Ino80_complex	15	0	0	1	1
GO:0031012_extracellular_matrix	245	0	0	1	1
GO:0031045_dense_core_granule	14	0	0	1	1
GO:0031080_nuclear_pore_outer_ring	10	0	0	1	1
GO:0031083_BLOC-1_complex	15	0	0	1	1
GO:0031089_platelet_dense_granule_lumen	14	0	0	1	1
GO:0031090_organelle_membrane	16	0	0	1	1
GO:0031091_platelet_alpha_granule	15	0	0	1	1
GO:0031092_platelet_alpha_granule_membrane	17	0	0	1	1
GO:0031093_platelet_alpha_granule_lumen	67	0	0	1	1
GO:0031105_septin_complex	14	0	0	1	1
GO:0031143_pseudopodium	18	0	0	1	1
GO:0031201_SNARE_complex	50	0	0	1	1
GO:0031209_SCAR_complex	10	0	0	1	1
GO:0031224_intrinsic_component_of_membrane	13	0	0	1	1
GO:0031225_anchored_component_of_membrane	102	0	0	1	1
GO:0031226_intrinsic_component_of_plasma_membrane	37	0	0	1	1
GO:0031227_intrinsic_component_of_endoplasmic_reticulum_membrane	9	0	0	1	1
GO:0031234_extrinsic_component_of_cytoplasmic_side_of_plasma_membrane	65	0	0	1	1
GO:0031252_cell_leading_edge	47	0	0	1	1
GO:0031253_cell_projection_membrane	13	0	0	1	1
GO:0031301_integral_component_of_organelle_membrane	10	0	0	1	1
GO:0031305_integral_component_of_mitochondrial_inner_membrane	40	0	0	1	1
GO:0031307_integral_component_of_mitochondrial_outer_membrane	23	0	0	1	1
GO:0031314_extrinsic_component_of_mitochondrial_inner_membrane	14	0	0	1	1
GO:0031362_anchored_component_of_external_side_of_plasma_membrane	19	0	0	1	1
GO:0031428_box_C/D_snoRNP_complex	7	0	0	1	1
GO:0031429_box_H/ACA_snoRNP_complex	5	0	0	1	1
GO:0031461_cullin-RING_ubiquitin_ligase_complex	13	0	0	1	1
GO:0031462_Cul2-RING_ubiquitin_ligase_complex	14	0	0	1	1
GO:0031463_Cul3-RING_ubiquitin_ligase_complex	36	0	0	1	1
GO:0031464_Cul4A-RING_E3_ubiquitin_ligase_complex	12	0	0	1	1
GO:0031514_motile_cilium	103	0	0	1	1
GO:0031519_PcG_protein_complex	27	0	0	1	1
GO:0031526_brush_border_membrane	58	0	0	1	1
GO:0031588_nucleotide-activated_protein_kinase_complex	9	0	0	1	1
GO:0031594_neuromuscular_junction	76	0	0	1	1
GO:0031616_spindle_pole_centrosome	15	0	0	1	1
GO:0031672_A_band	12	0	0	1	1
GO:0031674_I_band	20	0	0	1	1
GO:0031680_G-protein_beta/gamma-subunit_complex	12	0	0	1	1
GO:0031838_haptoglobin-hemoglobin_complex	11	0	0	1	1
GO:0031901_early_endosome_membrane	158	0.63	9.42	0.106311	1	LDLRAD4
GO:0031902_late_endosome_membrane	120	0	0	1	1
GO:0031904_endosome_lumen	18	0	0	1	1
GO:0031931_TORC1_complex	8	0	0	1	1
GO:0031932_TORC2_complex	12	0	0	1	1
GO:0031941_filamentous_actin	34	0	0	1	1
GO:0031965_nuclear_membrane	238	0	0	1	1
GO:0031966_mitochondrial_membrane	110	0	0	1	1
GO:0031982_vesicle	174	0	0	1	1
GO:0031985_Golgi_cisterna	9	0	0	1	1
GO:0032009_early_phagosome	12	0	0	1	1
GO:0032039_integrator_complex	28	0	0	1	1
GO:0032040_small-subunit_processome	39	0	0	1	1
GO:0032045_guanyl-nucleotide_exchange_factor_complex	12	0	0	1	1
GO:0032153_cell_division_site	14	0	0	1	1
GO:0032154_cleavage_furrow	53	0	0	1	1
GO:0032281_AMPA_glutamate_receptor_complex	26	0	0	1	1
GO:0032300_mismatch_repair_complex	8	0	0	1	1
GO:0032391_photoreceptor_connecting_cilium	40	0	0	1	1
GO:0032420_stereocilium	34	0	0	1	1
GO:0032426_stereocilium_tip	18	0	0	1	1
GO:0032433_filopodium_tip	18	0	0	1	1
GO:0032580_Golgi_cisterna_membrane	92	0	0	1	1
GO:0032585_multivesicular_body_membrane	13	0	0	1	1
GO:0032587_ruffle_membrane	95	1.05	15.76	0.0652729	1	PDPN
GO:0032588_trans-Golgi_network_membrane	92	0	0	1	1
GO:0032590_dendrite_membrane	30	0	0	1	1
GO:0032591_dendritic_spine_membrane	14	0	0	1	1
GO:0032592_integral_component_of_mitochondrial_membrane	10	0	0	1	1
GO:0032593_insulin-responsive_compartment	10	0	0	1	1
GO:0032797_SMN_complex	11	0	0	1	1
GO:0032809_neuronal_cell_body_membrane	28	0	0	1	1
GO:0032839_dendrite_cytoplasm	33	0	0	1	1
GO:0032982_myosin_filament	16	0	0	1	1
GO:0032991_protein-containing_complex	644	0.16	2.26	0.370199	1	CRYAB
GO:0032993_protein-DNA_complex	44	0	0	1	1
GO:0033017_sarcoplasmic_reticulum_membrane	33	0	0	1	1
GO:0033018_sarcoplasmic_reticulum_lumen	9	0	0	1	1
GO:0033116_endoplasmic_reticulum-Golgi_intermediate_compartment_membrane	74	1.35	20.31	0.0512015	1	TGFA
GO:0033162_melanosome_membrane	14	0	0	1	1
GO:0033268_node_of_Ranvier	15	0	0	1	1
GO:0033270_paranode_region_of_axon	12	0	0	1	1
GO:0033276_transcription_factor_TFTC_complex	14	0	0	1	1
GO:0033290_eukaryotic_48S_preinitiation_complex	15	0	0	1	1
GO:0033391_chromatoid_body	13	0	0	1	1
GO:0033588_Elongator_holoenzyme_complex	7	0	0	1	1
GO:0034045_phagophore_assembly_site_membrane	16	0	0	1	1
GO:0034098_VCP-NPL4-UFD1_AAA_ATPase_complex	8	0	0	1	1
GO:0034361_very-low-density_lipoprotein_particle	20	0	0	1	1
GO:0034362_low-density_lipoprotein_particle	13	0	0	1	1
GO:0034364_high-density_lipoprotein_particle	23	0	0	1	1
GO:0034366_spherical_high-density_lipoprotein_particle	8	0	0	1	1
GO:0034399_nuclear_periphery	14	0	0	1	1
GO:0034451_centriolar_satellite	95	0	0	1	1
GO:0034464_BBSome	8	0	0	1	1
GO:0034663_endoplasmic_reticulum_chaperone_complex	10	0	0	1	1
GO:0034704_calcium_channel_complex	24	0	0	1	1
GO:0034709_methylosome	12	0	0	1	1
GO:0034719_SMN-Sm_protein_complex	17	0	0	1	1
GO:0034774_secretory_granule_lumen	115	0	0	1	1
GO:0034993_meiotic_nuclear_membrane_microtubule_tethering_complex	11	0	0	1	1
GO:0035097_histone_methyltransferase_complex	34	0	0	1	1
GO:0035098_ESC/E(Z)_complex	16	0	0	1	1
GO:0035102_PRC1_complex	15	0	0	1	1
GO:0035145_exon-exon_junction_complex	20	0	0	1	1
GO:0035253_ciliary_rootlet	11	0	0	1	1
GO:0035267_NuA4_histone_acetyltransferase_complex	20	0	0	1	1
GO:0035327_transcriptionally_active_chromatin	24	0	0	1	1
GO:0035371_microtubule_plus-end	23	0	0	1	1
GO:0035577_azurophil_granule_membrane	58	0	0	1	1
GO:0035578_azurophil_granule_lumen	91	0	0	1	1
GO:0035579_specific_granule_membrane	90	0	0	1	1
GO:0035580_specific_granule_lumen	62	0	0	1	1
GO:0035631_CD40_receptor_complex	11	0	0	1	1
GO:0035770_ribonucleoprotein_granule	11	0	0	1	1
GO:0035861_site_of_double-strand_break	60	0	0	1	1
GO:0035869_ciliary_transition_zone	29	0	0	1	1
GO:0036020_endolysosome_membrane	14	0	0	1	1
GO:0036038_MKS_complex	13	0	0	1	1
GO:0036064_ciliary_basal_body	153	0	0	1	1
GO:0036126_sperm_flagellum	61	0	0	1	1
GO:0036128_CatSper_complex	10	0	0	1	1
GO:0036157_outer_dynein_arm	11	0	0	1	1
GO:0036449_microtubule_minus-end	8	0	0	1	1
GO:0036464_cytoplasmic_ribonucleoprotein_granule	78	0	0	1	1
GO:0036477_somatodendritic_compartment	13	0	0	1	1
GO:0042101_T_cell_receptor_complex	16	0	0	1	1
GO:0042383_sarcolemma	97	0	0	1	1
GO:0042405_nuclear_inclusion_body	12	0	0	1	1
GO:0042470_melanosome	99	0	0	1	1
GO:0042555_MCM_complex	12	0	0	1	1
GO:0042571_immunoglobulin_complex,_circulating	2	0	0	1	1
GO:0042581_specific_granule	13	0	0	1	1
GO:0042582_azurophil_granule	10	0	0	1	1
GO:0042589_zymogen_granule_membrane	11	0	0	1	1
GO:0042613_MHC_class_II_protein_complex	14	0	0	1	1
GO:0042622_photoreceptor_outer_segment_membrane	17	0	0	1	1
GO:0042627_chylomicron	13	0	0	1	1
GO:0042629_mast_cell_granule	22	0	0	1	1
GO:0042641_actomyosin	13	0	0	1	1
GO:0042645_mitochondrial_nucleoid	43	0	0	1	1
GO:0042734_presynaptic_membrane	67	0	0	1	1
GO:0042765_GPI-anchor_transamidase_complex	5	0	0	1	1
GO:0042788_polysomal_ribosome	32	0	0	1	1
GO:0042824_MHC_class_I_peptide_loading_complex	8	0	0	1	1
GO:0043005_neuron_projection	338	0.3	4.36	0.214362	1	GLRA1
GO:0043020_NADPH_oxidase_complex	12	0	0	1	1
GO:0043025_neuronal_cell_body	377	0.27	3.9	0.236082	1	GLRA1
GO:0043034_costamere	19	0	0	1	1
GO:0043083_synaptic_cleft	17	0	0	1	1
GO:0043186_P_granule	15	0	0	1	1
GO:0043194_axon_initial_segment	17	0	0	1	1
GO:0043195_terminal_bouton	54	0	0	1	1
GO:0043198_dendritic_shaft	38	0	0	1	1
GO:0043202_lysosomal_lumen	94	0	0	1	1
GO:0043209_myelin_sheath	28	0	0	1	1
GO:0043220_Schmidt-Lanterman_incisure	11	0	0	1	1
GO:0043231_intracellular_membrane-bounded_organelle	791	0.25	3.87	0.106968	1	LDLRAD4;GLRA1
GO:0043235_receptor_complex	207	0	0	1	1
GO:0043240_Fanconi_anaemia_nuclear_complex	14	0	0	1	1
GO:0043296_apical_junction_complex	22	0	0	1	1
GO:0043596_nuclear_replication_fork	12	0	0	1	1
GO:0043657_host_cell	51	0	0	1	1
GO:0043679_axon_terminus	60	0	0	1	1
GO:0044214_spanning_component_of_plasma_membrane	12	0	0	1	1
GO:0044224_juxtaparanode_region_of_axon	10	0	0	1	1
GO:0044233_mitochondria-associated_endoplasmic_reticulum_membrane	16	0	0	1	1
GO:0044291_cell-cell_contact_zone	25	0	0	1	1
GO:0044295_axonal_growth_cone	29	0	0	1	1
GO:0044297_cell_body	76	0	0	1	1
GO:0044306_neuron_projection_terminus	20	0	0	1	1
GO:0044322_endoplasmic_reticulum_quality_control_compartment	23	0	0	1	1
GO:0044327_dendritic_spine_head	12	0	0	1	1
GO:0044615_nuclear_pore_nuclear_basket	12	0	0	1	1
GO:0044666_MLL3/4_complex	13	0	0	1	1
GO:0044853_plasma_membrane_raft	32	0	0	1	1
GO:0045095_keratin_filament	93	0	0	1	1
GO:0045111_intermediate_filament_cytoskeleton	49	0	0	1	1
GO:0045121_membrane_raft	236	0.42	6.27	0.154756	1	PDPN
GO:0045171_intercellular_bridge	71	0	0	1	1
GO:0045177_apical_part_of_cell	76	0	0	1	1
GO:0045178_basal_part_of_cell	15	0	0	1	1
GO:0045202_synapse	419	0.24	3.5	0.258836	1	GLRA1
GO:0045211_postsynaptic_membrane	141	0.71	10.57	0.0954083	1	GLRA1
GO:0045334_clathrin-coated_endocytic_vesicle	26	0	0	1	1
GO:0045335_phagocytic_vesicle	66	0	0	1	1
GO:0046540_U4/U6_x_U5_tri-snRNP_complex	43	0	0	1	1
GO:0046658_anchored_component_of_plasma_membrane	31	0	0	1	1
GO:0046930_pore_complex	13	0	0	1	1
GO:0048188_Set1C/COMPASS_complex	12	0	0	1	1
GO:0048471_perinuclear_region_of_cytoplasm	702	0.28	4.38	0.0873995	1	SPP1;TGFA
GO:0048786_presynaptic_active_zone	39	0	0	1	1
GO:0048787_presynaptic_active_zone_membrane	12	0	0	1	1
GO:0051233_spindle_midzone	25	0	0	1	1
GO:0055037_recycling_endosome	126	0	0	1	1
GO:0055038_recycling_endosome_membrane	84	0	0	1	1
GO:0060076_excitatory_synapse	33	0	0	1	1
GO:0060170_ciliary_membrane	55	0	0	1	1
GO:0061617_MICOS_complex	9	0	0	1	1
GO:0061700_GATOR2_complex	12	0	0	1	1
GO:0062023_collagen-containing_extracellular_matrix	374	0	0	1	1
GO:0070062_extracellular_exosome	2130	0.14	2.17	0.188275	1	SPP1;SECTM1;CRYAB
GO:0070160_tight_junction	16	0	0	1	1
GO:0070187_shelterin_complex	7	0	0	1	1
GO:0070382_exocytic_vesicle	26	0	0	1	1
GO:0070531_BRCA1-A_complex	8	0	0	1	1
GO:0070652_HAUS_complex	8	0	0	1	1
GO:0070776_MOZ/MORF_histone_acetyltransferase_complex	8	0	0	1	1
GO:0070821_tertiary_granule_membrane	72	0	0	1	1
GO:0070971_endoplasmic_reticulum_exit_site	31	0	0	1	1
GO:0071004_U2-type_prespliceosome	16	0	0	1	1
GO:0071005_U2-type_precatalytic_spliceosome	50	0	0	1	1
GO:0071006_U2-type_catalytic_step_1_spliceosome	12	0	0	1	1
GO:0071007_U2-type_catalytic_step_2_spliceosome	30	0	0	1	1
GO:0071011_precatalytic_spliceosome	19	0	0	1	1
GO:0071013_catalytic_step_2_spliceosome	85	0	0	1	1
GO:0071203_WASH_complex	12	0	0	1	1
GO:0071339_MLL1_complex	29	0	0	1	1
GO:0071458_integral_component_of_cytoplasmic_side_of_endoplasmic_reticulum_membrane	6	0	0	1	1
GO:0071556_integral_component_of_lumenal_side_of_endoplasmic_reticulum_membrane	27	0	0	1	1
GO:0071564_npBAF_complex	12	0	0	1	1
GO:0071565_nBAF_complex	15	0	0	1	1
GO:0071682_endocytic_vesicle_lumen	16	0	0	1	1
GO:0071782_endoplasmic_reticulum_tubular_network	16	0	0	1	1
GO:0071944_cell_periphery	51	0	0	1	1
GO:0071986_Ragulator_complex	6	0	0	1	1
GO:0072546_ER_membrane_protein_complex	10	0	0	1	1
GO:0072559_NLRP3_inflammasome_complex	9	0	0	1	1
GO:0072562_blood_microparticle	115	0	0	1	1
GO:0072669_tRNA-splicing_ligase_complex	8	0	0	1	1
GO:0072686_mitotic_spindle	100	0	0	1	1
GO:0072687_meiotic_spindle	10	0	0	1	1
GO:0080008_Cul4-RING_E3_ubiquitin_ligase_complex	28	0	0	1	1
GO:0090543_Flemming_body	31	0	0	1	1
GO:0090575_RNA_polymerase_II_transcription_regulator_complex	61	0	0	1	1
GO:0090661_box_H/ACA_telomerase_RNP_complex	5	0	0	1	1
GO:0090734_site_of_DNA_damage	24	0	0	1	1
GO:0097038_perinuclear_endoplasmic_reticulum	17	0	0	1	1
GO:0097224_sperm_connecting_piece	9	0	0	1	1
GO:0097225_sperm_midpiece	29	0	0	1	1
GO:0097228_sperm_principal_piece	25	0	0	1	1
GO:0097381_photoreceptor_disc_membrane	23	0	0	1	1
GO:0097386_glial_cell_projection	13	0	0	1	1
GO:0097431_mitotic_spindle_pole	30	0	0	1	1
GO:0097440_apical_dendrite	17	0	0	1	1
GO:0097449_astrocyte_projection	12	0	0	1	1
GO:0097504_Gemini_of_coiled_bodies	12	0	0	1	1
GO:0097539_ciliary_transition_fiber	10	0	0	1	1
GO:0097542_ciliary_tip	46	0	0	1	1
GO:0097546_ciliary_base	36	0	0	1	1
GO:0097730_non-motile_cilium	29	0	0	1	1
GO:0097731_9+0_non-motile_cilium	22	0	0	1	1
GO:0098685_Schaffer_collateral_-_CA1_synapse	84	0	0	1	1
GO:0098686_hippocampal_mossy_fiber_to_CA3_synapse	34	0	0	1	1
GO:0098688_parallel_fiber_to_Purkinje_cell_synapse	16	0	0	1	1
GO:0098691_dopaminergic_synapse	13	0	0	1	1
GO:0098793_presynapse	109	0	0	1	1
GO:0098794_postsynapse	93	0	0	1	1
GO:0098831_presynaptic_active_zone_cytoplasmic_component	13	0	0	1	1
GO:0098839_postsynaptic_density_membrane	39	0	0	1	1
GO:0098978_glutamatergic_synapse	355	0	0	1	1
GO:0098981_cholinergic_synapse	10	0	0	1	1
GO:0098982_GABA-ergic_synapse	70	0	0	1	1
GO:0098993_anchored_component_of_synaptic_vesicle_membrane	13	0	0	1	1
GO:0099055_integral_component_of_postsynaptic_membrane	45	0	0	1	1
GO:0099059_integral_component_of_presynaptic_active_zone_membrane	15	0	0	1	1
GO:0099061_integral_component_of_postsynaptic_density_membrane	51	0	0	1	1
GO:0099078_BORC_complex	8	0	0	1	1
GO:0099092_postsynaptic_density,_intracellular_component	17	0	0	1	1
GO:0099523_presynaptic_cytosol	14	0	0	1	1
GO:0099524_postsynaptic_cytosol	18	0	0	1	1
GO:0099738_cell_cortex_region	11	0	0	1	1
GO:0101003_ficolin-1-rich_granule_membrane	60	0	0	1	1
GO:0101031_chaperone_complex	13	0	0	1	1
GO:1902494_catalytic_complex	12	0	0	1	1
GO:1902711_GABA-A_receptor_complex	19	0	0	1	1
GO:1903561_extracellular_vesicle	172	0	0	1	1
GO:1904724_tertiary_granule_lumen	55	0	0	1	1
GO:1904813_ficolin-1-rich_granule_lumen	124	0	0	1	1
GO:1990023_mitotic_spindle_midzone	14	0	0	1	1
GO:1990124_messenger_ribonucleoprotein_complex	10	0	0	1	1
GO:1990246_uniplex_complex	6	0	0	1	1
GO:1990454_L-type_voltage-gated_calcium_channel_complex	12	0	0	1	1
GO:1990904_ribonucleoprotein_complex	154	0	0	1	1
GO:1990907_beta-catenin-TCF_complex	10	0	0	1	1
GO:1990909_Wnt_signalosome	12	0	0	1	1

## Sheet: MF_8hrs - ORA_T4Mt8_vs_NIt8-MF_
ORA_T4Mt8_vs_NIt8-MF_all
geneset	NGenes	pctDE	OR	pvalue	FDR	external_gene_name.DE
GO:0000014_single-stranded_DNA_endodeoxyribonuclease_activity	9	0	0	1	1
GO:0000030_mannosyltransferase_activity	19	0	0	1	1
GO:0000049_tRNA_binding	66	0	0	1	1
GO:0000062_fatty-acyl-CoA_binding	20	0	0	1	1
GO:0000146_microfilament_motor_activity	28	0	0	1	1
GO:0000149_SNARE_binding	65	0	0	1	1
GO:0000166_nucleotide_binding	58	0	0	1	1
GO:0000175_3'-5'-exoribonuclease_activity	32	0	0	1	1
GO:0000287_magnesium_ion_binding	216	0	0	1	1
GO:0000339_RNA_cap_binding	12	0	0	1	1
GO:0000340_RNA_7-methylguanosine_cap_binding	12	0	0	1	1
GO:0000400_four-way_junction_DNA_binding	17	0	0	1	1
GO:0000774_adenyl-nucleotide_exchange_factor_activity	10	0	0	1	1
GO:0000828_inositol_hexakisphosphate_kinase_activity	8	0	0	1	1
GO:0000900_translation_repressor_activity,_mRNA_regulatory_element_binding	15	0	0	1	1
GO:0000976_transcription_regulatory_region_sequence-specific_DNA_binding	227	0	0	1	1
GO:0000977_RNA_polymerase_II_transcription_regulatory_region_sequence-specific_DNA_binding	388	0	0	1	1
GO:0000978_RNA_polymerase_II_cis-regulatory_region_sequence-specific_DNA_binding	1080	0.09	1.32	0.542457	1	GRHL3
GO:0000979_RNA_polymerase_II_core_promoter_sequence-specific_DNA_binding	24	0	0	1	1
GO:0000981_DNA-binding_transcription_factor_activity,_RNA_polymerase_II-specific	1295	0.08	1.09	0.609939	1	GRHL3
GO:0000987_cis-regulatory_region_sequence-specific_DNA_binding	55	0	0	1	1
GO:0000993_RNA_polymerase_II_complex_binding	46	0	0	1	1
GO:0001046_core_promoter_sequence-specific_DNA_binding	18	0	0	1	1
GO:0001085_RNA_polymerase_II_transcription_factor_binding	56	0	0	1	1
GO:0001102_RNA_polymerase_II_activating_transcription_factor_binding	47	0	0	1	1
GO:0001103_RNA_polymerase_II_repressing_transcription_factor_binding	35	0	0	1	1
GO:0001162_RNA_polymerase_II_intronic_transcription_regulatory_region_sequence-specific_DNA_binding	13	0	0	1	1
GO:0001222_transcription_corepressor_binding	12	0	0	1	1
GO:0001223_transcription_coactivator_binding	23	0	0	1	1
GO:0001227_DNA-binding_transcription_repressor_activity,_RNA_polymerase_II-specific	333	0	0	1	1
GO:0001228_DNA-binding_transcription_activator_activity,_RNA_polymerase_II-specific	512	0.2	2.86	0.306957	1	GRHL3
GO:0001517_N-acetylglucosamine_6-O-sulfotransferase_activity	7	0	0	1	1
GO:0001530_lipopolysaccharide_binding	33	0	0	1	1
GO:0001540_amyloid-beta_binding	77	1.3	19.5	0.0532239	1	CRYAB
GO:0001618_virus_receptor_activity	74	0	0	1	1
GO:0001664_G_protein-coupled_receptor_binding	67	0	0	1	1
GO:0001671_ATPase_activator_activity	24	0	0	1	1
GO:0001758_retinal_dehydrogenase_activity	8	0	0	1	1
GO:0001784_phosphotyrosine_residue_binding	42	0	0	1	1
GO:0001786_phosphatidylserine_binding	58	0	0	1	1
GO:0001849_complement_component_C1q_complex_binding	8	0	0	1	1
GO:0001965_G-protein_alpha-subunit_binding	26	0	0	1	1
GO:0001968_fibronectin_binding	27	0	0	1	1
GO:0001972_retinoic_acid_binding	20	0	0	1	1
GO:0002020_protease_binding	107	0	0	1	1
GO:0002039_p53_binding	66	0	0	1	1
GO:0002161_aminoacyl-tRNA_editing_activity	12	0	0	1	1
GO:0002162_dystroglycan_binding	10	0	0	1	1
GO:0003674_molecular_function	738	0	0	1	1
GO:0003676_nucleic_acid_binding	137	0	0	1	1
GO:0003677_DNA_binding	1191	0	0	1	1
GO:0003678_DNA_helicase_activity	54	0	0	1	1
GO:0003680_minor_groove_of_adenine-thymine-rich_DNA_binding	8	0	0	1	1
GO:0003682_chromatin_binding	445	0.22	3.29	0.272599	1	SAMD11
GO:0003684_damaged_DNA_binding	56	0	0	1	1
GO:0003688_DNA_replication_origin_binding	23	0	0	1	1
GO:0003689_DNA_clamp_loader_activity	9	0	0	1	1
GO:0003690_double-stranded_DNA_binding	101	0	0	1	1
GO:0003691_double-stranded_telomeric_DNA_binding	9	0	0	1	1
GO:0003697_single-stranded_DNA_binding	104	0	0	1	1
GO:0003700_DNA-binding_transcription_factor_activity	510	0.2	2.87	0.305954	1	GRHL3
GO:0003707_steroid_hormone_receptor_activity	22	0	0	1	1
GO:0003712_transcription_coregulator_activity	114	0	0	1	1
GO:0003713_transcription_coactivator_activity	239	0	0	1	1
GO:0003714_transcription_corepressor_activity	194	0	0	1	1
GO:0003720_telomerase_activity	7	0	0	1	1
GO:0003723_RNA_binding	1385	0	0	1	1
GO:0003724_RNA_helicase_activity	73	0	0	1	1
GO:0003725_double-stranded_RNA_binding	71	0	0	1	1
GO:0003727_single-stranded_RNA_binding	48	0	0	1	1
GO:0003729_mRNA_binding	202	0	0	1	1
GO:0003730_mRNA_3'-UTR_binding	100	0	0	1	1
GO:0003735_structural_constituent_of_ribosome	177	0	0	1	1
GO:0003743_translation_initiation_factor_activity	51	0	0	1	1
GO:0003746_translation_elongation_factor_activity	18	0	0	1	1
GO:0003755_peptidyl-prolyl_cis-trans_isomerase_activity	38	0	0	1	1
GO:0003756_protein_disulfide_isomerase_activity	19	0	0	1	1
GO:0003774_motor_activity	38	0	0	1	1
GO:0003777_microtubule_motor_activity	66	0	0	1	1
GO:0003779_actin_binding	263	0	0	1	1
GO:0003785_actin_monomer_binding	28	0	0	1	1
GO:0003796_lysozyme_activity	9	0	0	1	1
GO:0003810_protein-glutamine_gamma-glutamyltransferase_activity	9	0	0	1	1
GO:0003823_antigen_binding	21	0	0	1	1
GO:0003824_catalytic_activity	43	0	0	1	1
GO:0003841_1-acylglycerol-3-phosphate_O-acyltransferase_activity	15	0	0	1	1
GO:0003857_3-hydroxyacyl-CoA_dehydrogenase_activity	8	0	0	1	1
GO:0003887_DNA-directed_DNA_polymerase_activity	24	0	0	1	1
GO:0003899_DNA-directed_5'-3'_RNA_polymerase_activity	37	0	0	1	1
GO:0003906_DNA-(apurinic_or_apyrimidinic_site)_endonuclease_activity	11	0	0	1	1
GO:0003924_GTPase_activity	322	0	0	1	1
GO:0003950_NAD+_ADP-ribosyltransferase_activity	24	0	0	1	1
GO:0003951_NAD+_kinase_activity	17	0	0	1	1
GO:0003954_NADH_dehydrogenase_activity	7	0	0	1	1
GO:0003993_acid_phosphatase_activity	9	0	0	1	1
GO:0003996_acyl-CoA_ligase_activity	16	6.25	98.69	0.0112876	1	ACSBG1
GO:0004016_adenylate_cyclase_activity	10	0	0	1	1
GO:0004017_adenylate_kinase_activity	9	0	0	1	1
GO:0004024_alcohol_dehydrogenase_activity,_zinc-dependent	7	0	0	1	1
GO:0004029_aldehyde_dehydrogenase_(NAD+)_activity	13	0	0	1	1
GO:0004032_alditol:NADP+_1-oxidoreductase_activity	12	0	0	1	1
GO:0004033_aldo-keto_reductase_(NADP)_activity	12	0	0	1	1
GO:0004065_arylsulfatase_activity	14	0	0	1	1
GO:0004089_carbonate_dehydratase_activity	15	0	0	1	1
GO:0004114_3',5'-cyclic-nucleotide_phosphodiesterase_activity	21	0	0	1	1
GO:0004115_3',5'-cyclic-AMP_phosphodiesterase_activity	12	0	0	1	1
GO:0004126_cytidine_deaminase_activity	12	0	0	1	1
GO:0004129_cytochrome-c_oxidase_activity	26	0	0	1	1
GO:0004143_diacylglycerol_kinase_activity	11	0	0	1	1
GO:0004175_endopeptidase_activity	81	0	0	1	1
GO:0004177_aminopeptidase_activity	25	0	0	1	1
GO:0004180_carboxypeptidase_activity	16	0	0	1	1
GO:0004181_metallocarboxypeptidase_activity	29	0	0	1	1
GO:0004190_aspartic-type_endopeptidase_activity	18	0	0	1	1
GO:0004197_cysteine-type_endopeptidase_activity	91	0	0	1	1
GO:0004198_calcium-dependent_cysteine-type_endopeptidase_activity	12	0	0	1	1
GO:0004222_metalloendopeptidase_activity	108	0	0	1	1
GO:0004252_serine-type_endopeptidase_activity	164	0	0	1	1
GO:0004298_threonine-type_endopeptidase_activity	21	0	0	1	1
GO:0004300_enoyl-CoA_hydratase_activity	10	0	0	1	1
GO:0004303_estradiol_17-beta-dehydrogenase_activity	11	0	0	1	1
GO:0004308_exo-alpha-sialidase_activity	4	0	0	1	1
GO:0004322_ferroxidase_activity	8	0	0	1	1
GO:0004340_glucokinase_activity	5	0	0	1	1
GO:0004364_glutathione_transferase_activity	24	0	0	1	1
GO:0004383_guanylate_cyclase_activity	8	0	0	1	1
GO:0004385_guanylate_kinase_activity	9	0	0	1	1
GO:0004386_helicase_activity	31	0	0	1	1
GO:0004402_histone_acetyltransferase_activity	37	0	0	1	1
GO:0004407_histone_deacetylase_activity	23	0	0	1	1
GO:0004435_phosphatidylinositol_phospholipase_C_activity	26	0	0	1	1
GO:0004438_phosphatidylinositol-3-phosphatase_activity	17	0	0	1	1
GO:0004439_phosphatidylinositol-4,5-bisphosphate_5-phosphatase_activity	9	0	0	1	1
GO:0004467_long-chain_fatty_acid-CoA_ligase_activity	13	7.69	123.45	0.00918039	1	ACSBG1
GO:0004497_monooxygenase_activity	35	0	0	1	1
GO:0004518_nuclease_activity	17	0	0	1	1
GO:0004519_endonuclease_activity	33	0	0	1	1
GO:0004520_endodeoxyribonuclease_activity	8	0	0	1	1
GO:0004521_endoribonuclease_activity	31	0	0	1	1
GO:0004523_RNA-DNA_hybrid_ribonuclease_activity	6	0	0	1	1
GO:0004526_ribonuclease_P_activity	12	0	0	1	1
GO:0004527_exonuclease_activity	14	0	0	1	1
GO:0004535_poly(A)-specific_ribonuclease_activity	14	0	0	1	1
GO:0004540_ribonuclease_activity	17	0	0	1	1
GO:0004550_nucleoside_diphosphate_kinase_activity	17	0	0	1	1
GO:0004571_mannosyl-oligosaccharide_1,2-alpha-mannosidase_activity	7	0	0	1	1
GO:0004596_peptide_alpha-N-acetyltransferase_activity	10	0	0	1	1
GO:0004601_peroxidase_activity	33	0	0	1	1
GO:0004602_glutathione_peroxidase_activity	20	0	0	1	1
GO:0004620_phospholipase_activity	22	0	0	1	1
GO:0004622_lysophospholipase_activity	24	0	0	1	1
GO:0004623_phospholipase_A2_activity	28	0	0	1	1
GO:0004652_polynucleotide_adenylyltransferase_activity	10	0	0	1	1
GO:0004653_polypeptide_N-acetylgalactosaminyltransferase_activity	19	0	0	1	1
GO:0004672_protein_kinase_activity	209	0	0	1	1
GO:0004674_protein_serine/threonine_kinase_activity	358	0	0	1	1
GO:0004679_AMP-activated_protein_kinase_activity	10	0	0	1	1
GO:0004683_calmodulin-dependent_protein_kinase_activity	22	0	0	1	1
GO:0004691_cAMP-dependent_protein_kinase_activity	8	0	0	1	1
GO:0004693_cyclin-dependent_protein_serine/threonine_kinase_activity	29	0	0	1	1
GO:0004698_calcium-dependent_protein_kinase_C_activity	16	0	0	1	1
GO:0004706_JUN_kinase_kinase_kinase_activity	8	0	0	1	1
GO:0004707_MAP_kinase_activity	20	0	0	1	1
GO:0004708_MAP_kinase_kinase_activity	18	0	0	1	1
GO:0004709_MAP_kinase_kinase_kinase_activity	17	0	0	1	1
GO:0004712_protein_serine/threonine/tyrosine_kinase_activity	29	0	0	1	1
GO:0004713_protein_tyrosine_kinase_activity	86	0	0	1	1
GO:0004714_transmembrane_receptor_protein_tyrosine_kinase_activity	51	0	0	1	1
GO:0004715_non-membrane_spanning_protein_tyrosine_kinase_activity	46	0	0	1	1
GO:0004721_phosphoprotein_phosphatase_activity	39	0	0	1	1
GO:0004722_protein_serine/threonine_phosphatase_activity	62	0	0	1	1
GO:0004724_magnesium-dependent_protein_serine/threonine_phosphatase_activity	12	0	0	1	1
GO:0004725_protein_tyrosine_phosphatase_activity	99	0	0	1	1
GO:0004726_non-membrane_spanning_protein_tyrosine_phosphatase_activity	9	0	0	1	1
GO:0004745_retinol_dehydrogenase_activity	20	0	0	1	1
GO:0004771_sterol_esterase_activity	9	0	0	1	1
GO:0004806_triglyceride_lipase_activity	27	0	0	1	1
GO:0004842_ubiquitin-protein_transferase_activity	232	0	0	1	1
GO:0004843_thiol-dependent_ubiquitin-specific_protease_activity	113	0	0	1	1
GO:0004857_enzyme_inhibitor_activity	31	0	0	1	1
GO:0004860_protein_kinase_inhibitor_activity	31	0	0	1	1
GO:0004861_cyclin-dependent_protein_serine/threonine_kinase_inhibitor_activity	12	0	0	1	1
GO:0004864_protein_phosphatase_inhibitor_activity	33	0	0	1	1
GO:0004865_protein_serine/threonine_phosphatase_inhibitor_activity	11	0	0	1	1
GO:0004866_endopeptidase_inhibitor_activity	40	0	0	1	1
GO:0004867_serine-type_endopeptidase_inhibitor_activity	97	0	0	1	1
GO:0004869_cysteine-type_endopeptidase_inhibitor_activity	33	0	0	1	1
GO:0004875_complement_receptor_activity	10	0	0	1	1
GO:0004879_nuclear_receptor_activity	52	0	0	1	1
GO:0004888_transmembrane_signaling_receptor_activity	144	0.69	10.34	0.0973413	1	GLRA1
GO:0004890_GABA-A_receptor_activity	19	0	0	1	1
GO:0004896_cytokine_receptor_activity	46	0	0	1	1
GO:0004930_G_protein-coupled_receptor_activity	699	0.14	2.08	0.394902	1	S1PR3
GO:0004931_extracellularly_ATP-gated_cation_channel_activity	7	0	0	1	1
GO:0004950_chemokine_receptor_activity	17	0	0	1	1
GO:0004972_NMDA_glutamate_receptor_activity	8	0	0	1	1
GO:0004984_olfactory_receptor_activity	386	0	0	1	1
GO:0004993_G_protein-coupled_serotonin_receptor_activity	32	0	0	1	1
GO:0005000_vasopressin_receptor_activity	7	0	0	1	1
GO:0005001_transmembrane_receptor_protein_tyrosine_phosphatase_activity	17	0	0	1	1
GO:0005005_transmembrane-ephrin_receptor_activity	17	0	0	1	1
GO:0005007_fibroblast_growth_factor-activated_receptor_activity	5	0	0	1	1
GO:0005024_transforming_growth_factor_beta-activated_receptor_activity	9	0	0	1	1
GO:0005031_tumor_necrosis_factor-activated_receptor_activity	10	0	0	1	1
GO:0005041_low-density_lipoprotein_particle_receptor_activity	13	0	0	1	1
GO:0005044_scavenger_receptor_activity	47	0	0	1	1
GO:0005049_nuclear_export_signal_receptor_activity	11	0	0	1	1
GO:0005068_transmembrane_receptor_protein_tyrosine_kinase_adaptor_activity	13	0	0	1	1
GO:0005078_MAP-kinase_scaffold_activity	11	0	0	1	1
GO:0005080_protein_kinase_C_binding	55	0	0	1	1
GO:0005085_guanyl-nucleotide_exchange_factor_activity	122	0	0	1	1
GO:0005086_ARF_guanyl-nucleotide_exchange_factor_activity	19	0	0	1	1
GO:0005088_Ras_guanyl-nucleotide_exchange_factor_activity	15	0	0	1	1
GO:0005089_Rho_guanyl-nucleotide_exchange_factor_activity	49	0	0	1	1
GO:0005092_GDP-dissociation_inhibitor_activity	12	0	0	1	1
GO:0005095_GTPase_inhibitor_activity	14	0	0	1	1
GO:0005096_GTPase_activator_activity	275	0	0	1	1
GO:0005102_signaling_receptor_binding	357	0.56	8.75	0.0260636	1	PDPN;HAP1
GO:0005104_fibroblast_growth_factor_receptor_binding	24	0	0	1	1
GO:0005109_frizzled_binding	38	0	0	1	1
GO:0005112_Notch_binding	26	0	0	1	1
GO:0005113_patched_binding	8	0	0	1	1
GO:0005114_type_II_transforming_growth_factor_beta_receptor_binding	8	0	0	1	1
GO:0005123_death_receptor_binding	15	0	0	1	1
GO:0005125_cytokine_activity	188	1.06	16.81	0.0077401	1	SPP1;SECTM1
GO:0005126_cytokine_receptor_binding	11	0	0	1	1
GO:0005131_growth_hormone_receptor_binding	9	0	0	1	1
GO:0005132_type_I_interferon_receptor_binding	17	0	0	1	1
GO:0005149_interleukin-1_receptor_binding	13	0	0	1	1
GO:0005154_epidermal_growth_factor_receptor_binding	34	2.94	44.92	0.0238418	1	TGFA
GO:0005158_insulin_receptor_binding	23	0	0	1	1
GO:0005159_insulin-like_growth_factor_receptor_binding	16	0	0	1	1
GO:0005160_transforming_growth_factor_beta_receptor_binding	14	0	0	1	1
GO:0005161_platelet-derived_growth_factor_receptor_binding	15	0	0	1	1
GO:0005164_tumor_necrosis_factor_receptor_binding	31	0	0	1	1
GO:0005178_integrin_binding	142	1.41	22.36	0.00449439	1	SPP1;S1PR3
GO:0005179_hormone_activity	98	0	0	1	1
GO:0005184_neuropeptide_hormone_activity	29	0	0	1	1
GO:0005198_structural_molecule_activity	163	0.61	9.13	0.109493	1	CRYAB
GO:0005200_structural_constituent_of_cytoskeleton	102	0	0	1	1
GO:0005201_extracellular_matrix_structural_constituent	137	0	0	1	1
GO:0005212_structural_constituent_of_eye_lens	24	4.17	64.39	0.016886	1	CRYAB
GO:0005215_transporter_activity	40	0	0	1	1
GO:0005216_ion_channel_activity	17	0	0	1	1
GO:0005219_ryanodine-sensitive_calcium-release_channel_activity	4	0	0	1	1
GO:0005227_calcium_activated_cation_channel_activity	14	0	0	1	1
GO:0005229_intracellular_calcium_activated_chloride_channel_activity	16	0	0	1	1
GO:0005237_inhibitory_extracellular_ligand-gated_ion_channel_activity	11	0	0	1	1
GO:0005242_inward_rectifier_potassium_channel_activity	20	0	0	1	1
GO:0005243_gap_junction_channel_activity	21	0	0	1	1
GO:0005244_voltage-gated_ion_channel_activity	45	0	0	1	1
GO:0005245_voltage-gated_calcium_channel_activity	38	0	0	1	1
GO:0005246_calcium_channel_regulator_activity	36	2.78	42.37	0.0252273	1	HPCAL4
GO:0005247_voltage-gated_chloride_channel_activity	11	0	0	1	1
GO:0005248_voltage-gated_sodium_channel_activity	21	0	0	1	1
GO:0005249_voltage-gated_potassium_channel_activity	59	0	0	1	1
GO:0005251_delayed_rectifier_potassium_channel_activity	33	0	0	1	1
GO:0005254_chloride_channel_activity	64	1.56	23.54	0.0444305	1	GLRA1
GO:0005261_cation_channel_activity	43	0	0	1	1
GO:0005262_calcium_channel_activity	54	0	0	1	1
GO:0005267_potassium_channel_activity	29	0	0	1	1
GO:0005313_L-glutamate_transmembrane_transporter_activity	12	0	0	1	1
GO:0005319_lipid_transporter_activity	25	0	0	1	1
GO:0005324_long-chain_fatty_acid_transporter_activity	17	0	0	1	1
GO:0005326_neurotransmitter_transmembrane_transporter_activity	18	0	0	1	1
GO:0005344_oxygen_carrier_activity	14	0	0	1	1
GO:0005347_ATP_transmembrane_transporter_activity	25	0	0	1	1
GO:0005355_glucose_transmembrane_transporter_activity	14	0	0	1	1
GO:0005381_iron_ion_transmembrane_transporter_activity	9	0	0	1	1
GO:0005385_zinc_ion_transmembrane_transporter_activity	21	0	0	1	1
GO:0005388_calcium_transmembrane_transporter_activity,_phosphorylative_mechanism	9	0	0	1	1
GO:0005391_sodium:potassium-exchanging_ATPase_activity	11	0	0	1	1
GO:0005412_glucose:sodium_symporter_activity	7	0	0	1	1
GO:0005432_calcium:sodium_antiporter_activity	5	0	0	1	1
GO:0005436_sodium:phosphate_symporter_activity	10	0	0	1	1
GO:0005452_inorganic_anion_exchanger_activity	13	0	0	1	1
GO:0005484_SNAP_receptor_activity	36	0	0	1	1
GO:0005496_steroid_binding	33	0	0	1	1
GO:0005504_fatty_acid_binding	24	0	0	1	1
GO:0005506_iron_ion_binding	128	0	0	1	1
GO:0005507_copper_ion_binding	55	0	0	1	1
GO:0005509_calcium_ion_binding	704	0.14	2.06	0.397102	1	HPCAL4
GO:0005515_protein_binding	12037	0.12	3.44	0.0107011	1	SPP1;PRSS35;S1PR3;SECTM1;PDPN;GRHL3;TGFA;CRYAB;FST;SAMD11;GLRA1;HAP1;HPCAL4;SFRP4
GO:0005516_calmodulin_binding	200	0	0	1	1
GO:0005518_collagen_binding	67	0	0	1	1
GO:0005520_insulin-like_growth_factor_binding	19	0	0	1	1
GO:0005521_lamin_binding	16	0	0	1	1
GO:0005522_profilin_binding	11	0	0	1	1
GO:0005523_tropomyosin_binding	16	0	0	1	1
GO:0005524_ATP_binding	1465	0.07	0.96	0.656503	1	ACSBG1
GO:0005525_GTP_binding	372	0	0	1	1
GO:0005536_glucose_binding	11	0	0	1	1
GO:0005537_mannose_binding	20	0	0	1	1
GO:0005539_glycosaminoglycan_binding	26	0	0	1	1
GO:0005540_hyaluronic_acid_binding	22	0	0	1	1
GO:0005542_folic_acid_binding	11	0	0	1	1
GO:0005543_phospholipid_binding	108	0	0	1	1
GO:0005544_calcium-dependent_phospholipid_binding	54	0	0	1	1
GO:0005545_1-phosphatidylinositol_binding	14	0	0	1	1
GO:0005546_phosphatidylinositol-4,5-bisphosphate_binding	82	0	0	1	1
GO:0005547_phosphatidylinositol-3,4,5-trisphosphate_binding	39	0	0	1	1
GO:0005549_odorant_binding	92	0	0	1	1
GO:0008009_chemokine_activity	49	0	0	1	1
GO:0008013_beta-catenin_binding	85	0	0	1	1
GO:0008017_microtubule_binding	251	0.4	5.89	0.163783	1	CRYAB
GO:0008020_G_protein-coupled_photoreceptor_activity	15	0	0	1	1
GO:0008022_protein_C-terminus_binding	189	0.53	7.86	0.125871	1	HPCAL4
GO:0008028_monocarboxylic_acid_transmembrane_transporter_activity	17	0	0	1	1
GO:0008035_high-density_lipoprotein_particle_binding	16	0	0	1	1
GO:0008047_enzyme_activator_activity	52	0	0	1	1
GO:0008061_chitin_binding	8	0	0	1	1
GO:0008066_glutamate_receptor_activity	16	0	0	1	1
GO:0008080_N-acetyltransferase_activity	17	0	0	1	1
GO:0008081_phosphoric_diester_hydrolase_activity	13	0	0	1	1
GO:0008083_growth_factor_activity	162	0.62	9.18	0.108858	1	TGFA
GO:0008092_cytoskeletal_protein_binding	54	0	0	1	1
GO:0008093_cytoskeletal_anchor_activity	19	0	0	1	1
GO:0008094_DNA-dependent_ATPase_activity	34	0	0	1	1
GO:0008097_5S_rRNA_binding	11	0	0	1	1
GO:0008106_alcohol_dehydrogenase_(NADP+)_activity	11	0	0	1	1
GO:0008134_transcription_factor_binding	313	0	0	1	1
GO:0008135_translation_factor_activity,_RNA_binding	22	0	0	1	1
GO:0008137_NADH_dehydrogenase_(ubiquinone)_activity	46	0	0	1	1
GO:0008138_protein_tyrosine/serine/threonine_phosphatase_activity	39	0	0	1	1
GO:0008139_nuclear_localization_sequence_binding	26	0	0	1	1
GO:0008140_cAMP_response_element_binding_protein_binding	9	0	0	1	1
GO:0008143_poly(A)_binding	23	0	0	1	1
GO:0008144_drug_binding	72	0	0	1	1
GO:0008146_sulfotransferase_activity	37	0	0	1	1
GO:0008157_protein_phosphatase_1_binding	30	0	0	1	1
GO:0008168_methyltransferase_activity	52	1.92	29.09	0.0362449	1	METTL7B
GO:0008171_O-methyltransferase_activity	9	0	0	1	1
GO:0008173_RNA_methyltransferase_activity	10	0	0	1	1
GO:0008179_adenylate_cyclase_binding	13	0	0	1	1
GO:0008188_neuropeptide_receptor_activity	16	0	0	1	1
GO:0008190_eukaryotic_initiation_factor_4E_binding	10	0	0	1	1
GO:0008191_metalloendopeptidase_inhibitor_activity	16	0	0	1	1
GO:0008194_UDP-glycosyltransferase_activity	12	0	0	1	1
GO:0008195_phosphatidate_phosphatase_activity	13	0	0	1	1
GO:0008198_ferrous_iron_binding	25	0	0	1	1
GO:0008199_ferric_iron_binding	10	0	0	1	1
GO:0008201_heparin_binding	169	0	0	1	1
GO:0008233_peptidase_activity	84	0	0	1	1
GO:0008234_cysteine-type_peptidase_activity	27	0	0	1	1
GO:0008236_serine-type_peptidase_activity	53	0	0	1	1
GO:0008237_metallopeptidase_activity	64	0	0	1	1
GO:0008253_5'-nucleotidase_activity	13	0	0	1	1
GO:0008266_poly(U)_RNA_binding	26	0	0	1	1
GO:0008270_zinc_ion_binding	809	0.12	1.79	0.44158	1	GLRA1
GO:0008271_secondary_active_sulfate_transmembrane_transporter_activity	11	0	0	1	1
GO:0008273_calcium,_potassium:sodium_antiporter_activity	5	0	0	1	1
GO:0008276_protein_methyltransferase_activity	10	0	0	1	1
GO:0008289_lipid_binding	152	0.66	9.79	0.102477	1	S1PR3
GO:0008301_DNA_binding,_bending	16	0	0	1	1
GO:0008307_structural_constituent_of_muscle	43	0	0	1	1
GO:0008308_voltage-gated_anion_channel_activity	6	0	0	1	1
GO:0008320_protein_transmembrane_transporter_activity	20	0	0	1	1
GO:0008327_methyl-CpG_binding	24	0	0	1	1
GO:0008330_protein_tyrosine/threonine_phosphatase_activity	10	0	0	1	1
GO:0008331_high_voltage-gated_calcium_channel_activity	10	0	0	1	1
GO:0008353_RNA_polymerase_II_CTD_heptapeptide_repeat_kinase_activity	12	0	0	1	1
GO:0008373_sialyltransferase_activity	15	0	0	1	1
GO:0008374_O-acyltransferase_activity	19	0	0	1	1
GO:0008375_acetylglucosaminyltransferase_activity	32	0	0	1	1
GO:0008376_acetylgalactosaminyltransferase_activity	24	0	0	1	1
GO:0008378_galactosyltransferase_activity	10	0	0	1	1
GO:0008381_mechanosensitive_ion_channel_activity	13	0	0	1	1
GO:0008392_arachidonic_acid_epoxygenase_activity	16	0	0	1	1
GO:0008395_steroid_hydroxylase_activity	31	0	0	1	1
GO:0008401_retinoic_acid_4-hydroxylase_activity	10	0	0	1	1
GO:0008408_3'-5'_exonuclease_activity	16	0	0	1	1
GO:0008409_5'-3'_exonuclease_activity	12	0	0	1	1
GO:0008420_RNA_polymerase_II_CTD_heptapeptide_repeat_phosphatase_activity	7	0	0	1	1
GO:0008429_phosphatidylethanolamine_binding	11	0	0	1	1
GO:0008474_palmitoyl-(protein)_hydrolase_activity	13	0	0	1	1
GO:0008494_translation_activator_activity	14	0	0	1	1
GO:0008503_benzodiazepine_receptor_activity	11	0	0	1	1
GO:0008504_monoamine_transmembrane_transporter_activity	9	0	0	1	1
GO:0008510_sodium:bicarbonate_symporter_activity	6	0	0	1	1
GO:0008514_organic_anion_transmembrane_transporter_activity	12	0	0	1	1
GO:0008517_folic_acid_transmembrane_transporter_activity	4	0	0	1	1
GO:0008519_ammonium_transmembrane_transporter_activity	10	0	0	1	1
GO:0008526_phosphatidylinositol_transfer_activity	9	0	0	1	1
GO:0008527_taste_receptor_activity	15	0	0	1	1
GO:0008528_G_protein-coupled_peptide_receptor_activity	43	0	0	1	1
GO:0008532_N-acetyllactosaminide_beta-1,3-N-acetylglucosaminyltransferase_activity	11	0	0	1	1
GO:0008536_Ran_GTPase_binding	39	0	0	1	1
GO:0008553_proton-exporting_ATPase_activity,_phosphorylative_mechanism	14	0	0	1	1
GO:0008568_microtubule-severing_ATPase_activity	9	0	0	1	1
GO:0008569_ATP-dependent_microtubule_motor_activity,_minus-end-directed	18	0	0	1	1
GO:0008574_ATP-dependent_microtubule_motor_activity,_plus-end-directed	16	0	0	1	1
GO:0008603_cAMP-dependent_protein_kinase_regulator_activity	7	0	0	1	1
GO:0008656_cysteine-type_endopeptidase_activator_activity_involved_in_apoptotic_process	17	0	0	1	1
GO:0008757_S-adenosylmethionine-dependent_methyltransferase_activity	12	0	0	1	1
GO:0008821_crossover_junction_endodeoxyribonuclease_activity	6	0	0	1	1
GO:0008970_phospholipase_A1_activity	12	0	0	1	1
GO:0009055_electron_transfer_activity	75	0	0	1	1
GO:0009922_fatty_acid_elongase_activity	7	0	0	1	1
GO:0009982_pseudouridine_synthase_activity	13	0	0	1	1
GO:0010181_FMN_binding	16	0	0	1	1
GO:0010314_phosphatidylinositol-5-phosphate_binding	19	0	0	1	1
GO:0015020_glucuronosyltransferase_activity	26	0	0	1	1
GO:0015026_coreceptor_activity	41	0	0	1	1
GO:0015035_protein_disulfide_oxidoreductase_activity	21	0	0	1	1
GO:0015095_magnesium_ion_transmembrane_transporter_activity	16	0	0	1	1
GO:0015101_organic_cation_transmembrane_transporter_activity	6	0	0	1	1
GO:0015106_bicarbonate_transmembrane_transporter_activity	16	0	0	1	1
GO:0015108_chloride_transmembrane_transporter_activity	17	0	0	1	1
GO:0015116_sulfate_transmembrane_transporter_activity	15	0	0	1	1
GO:0015125_bile_acid_transmembrane_transporter_activity	12	0	0	1	1
GO:0015171_amino_acid_transmembrane_transporter_activity	41	0	0	1	1
GO:0015174_basic_amino_acid_transmembrane_transporter_activity	9	0	0	1	1
GO:0015175_neutral_amino_acid_transmembrane_transporter_activity	11	0	0	1	1
GO:0015179_L-amino_acid_transmembrane_transporter_activity	14	0	0	1	1
GO:0015180_L-alanine_transmembrane_transporter_activity	9	0	0	1	1
GO:0015183_L-aspartate_transmembrane_transporter_activity	9	0	0	1	1
GO:0015186_L-glutamine_transmembrane_transporter_activity	8	0	0	1	1
GO:0015187_glycine_transmembrane_transporter_activity	8	0	0	1	1
GO:0015193_L-proline_transmembrane_transporter_activity	7	0	0	1	1
GO:0015220_choline_transmembrane_transporter_activity	5	0	0	1	1
GO:0015232_heme_transmembrane_transporter_activity	8	0	0	1	1
GO:0015248_sterol_transporter_activity	14	0	0	1	1
GO:0015250_water_channel_activity	12	0	0	1	1
GO:0015267_channel_activity	12	0	0	1	1
GO:0015269_calcium-activated_potassium_channel_activity	11	0	0	1	1
GO:0015271_outward_rectifier_potassium_channel_activity	9	0	0	1	1
GO:0015276_ligand-gated_ion_channel_activity	31	0	0	1	1
GO:0015278_calcium-release_channel_activity	9	0	0	1	1
GO:0015279_store-operated_calcium_channel_activity	10	0	0	1	1
GO:0015280_ligand-gated_sodium_channel_activity	11	0	0	1	1
GO:0015293_symporter_activity	54	0	0	1	1
GO:0015297_antiporter_activity	25	0	0	1	1
GO:0015301_anion:anion_antiporter_activity	21	0	0	1	1
GO:0015347_sodium-independent_organic_anion_transmembrane_transporter_activity	16	0	0	1	1
GO:0015379_potassium:chloride_symporter_activity	9	0	0	1	1
GO:0015385_sodium:proton_antiporter_activity	12	0	0	1	1
GO:0015386_potassium:proton_antiporter_activity	11	0	0	1	1
GO:0015459_potassium_channel_regulator_activity	42	0	0	1	1
GO:0015464_acetylcholine_receptor_activity	15	0	0	1	1
GO:0015485_cholesterol_binding	49	0	0	1	1
GO:0015562_efflux_transmembrane_transporter_activity	14	0	0	1	1
GO:0015631_tubulin_binding	59	0	0	1	1
GO:0015643_toxic_substance_binding	11	0	0	1	1
GO:0016018_cyclosporin_A_binding	20	0	0	1	1
GO:0016174_NAD(P)H_oxidase_H2O2-forming_activity	9	0	0	1	1
GO:0016175_superoxide-generating_NAD(P)H_oxidase_activity	13	0	0	1	1
GO:0016176_superoxide-generating_NADPH_oxidase_activator_activity	10	0	0	1	1
GO:0016208_AMP_binding	14	0	0	1	1
GO:0016209_antioxidant_activity	18	0	0	1	1
GO:0016251_RNA_polymerase_II_general_transcription_initiation_factor_activity	37	0	0	1	1
GO:0016274_protein-arginine_N-methyltransferase_activity	8	0	0	1	1
GO:0016279_protein-lysine_N-methyltransferase_activity	23	0	0	1	1
GO:0016290_palmitoyl-CoA_hydrolase_activity	14	0	0	1	1
GO:0016298_lipase_activity	15	0	0	1	1
GO:0016301_kinase_activity	85	0	0	1	1
GO:0016303_1-phosphatidylinositol-3-kinase_activity	10	0	0	1	1
GO:0016407_acetyltransferase_activity	17	0	0	1	1
GO:0016409_palmitoyltransferase_activity	18	0	0	1	1
GO:0016410_N-acyltransferase_activity	18	0	0	1	1
GO:0016491_oxidoreductase_activity	136	0	0	1	1
GO:0016493_C-C_chemokine_receptor_activity	23	0	0	1	1
GO:0016504_peptidase_activator_activity	10	0	0	1	1
GO:0016538_cyclin-dependent_protein_serine/threonine_kinase_regulator_activity	32	0	0	1	1
GO:0016594_glycine_binding	14	7.14	113.98	0.00988325	1	GLRA1
GO:0016597_amino_acid_binding	18	0	0	1	1
GO:0016616_oxidoreductase_activity,_acting_on_the_CH-OH_group_of_donors,_NAD_or_NADP_as_acceptor	23	0	0	1	1
GO:0016702_oxidoreductase_activity,_acting_on_single_donors_with_incorporation_of_molecular_oxygen,_incorporation_of_two_atoms_of_oxygen	14	0	0	1	1
GO:0016706_2-oxoglutarate-dependent_dioxygenase_activity	19	0	0	1	1
GO:0016709_oxidoreductase_activity,_acting_on_paired_donors,_with_incorporation_or_reduction_of_molecular_oxygen,_NAD(P)H_as_one_donor,_and_incorporation_of_one_atom_of_oxygen	16	0	0	1	1
GO:0016712_oxidoreductase_activity,_acting_on_paired_donors,_with_incorporation_or_reduction_of_molecular_oxygen,_reduced_flavin_or_flavoprotein_as_one_donor,_and_incorporation_of_one_atom_of_oxygen	22	0	0	1	1
GO:0016740_transferase_activity	40	0	0	1	1
GO:0016746_transferase_activity,_transferring_acyl_groups	27	0	0	1	1
GO:0016757_transferase_activity,_transferring_glycosyl_groups	22	0	0	1	1
GO:0016758_transferase_activity,_transferring_hexosyl_groups	17	0	0	1	1
GO:0016773_phosphotransferase_activity,_alcohol_group_as_acceptor	9	0	0	1	1
GO:0016779_nucleotidyltransferase_activity	16	0	0	1	1
GO:0016787_hydrolase_activity	84	0	0	1	1
GO:0016788_hydrolase_activity,_acting_on_ester_bonds	13	0	0	1	1
GO:0016791_phosphatase_activity	54	0	0	1	1
GO:0016805_dipeptidase_activity	11	0	0	1	1
GO:0016829_lyase_activity	15	0	0	1	1
GO:0016836_hydro-lyase_activity	20	0	0	1	1
GO:0016853_isomerase_activity	14	0	0	1	1
GO:0016887_ATPase_activity	218	0	0	1	1
GO:0016922_nuclear_receptor_binding	20	0	0	1	1
GO:0017016_Ras_GTPase_binding	17	0	0	1	1
GO:0017017_MAP_kinase_tyrosine/serine/threonine_phosphatase_activity	13	0	0	1	1
GO:0017022_myosin_binding	23	4.35	67.5	0.0161878	1	HAP1
GO:0017025_TBP-class_protein_binding	26	0	0	1	1
GO:0017040_N-acylsphingosine_amidohydrolase_activity	6	0	0	1	1
GO:0017046_peptide_hormone_binding	40	0	0	1	1
GO:0017048_Rho_GTPase_binding	32	0	0	1	1
GO:0017049_GTP-Rho_binding	22	0	0	1	1
GO:0017056_structural_constituent_of_nuclear_pore	27	0	0	1	1
GO:0017069_snRNA_binding	12	0	0	1	1
GO:0017070_U6_snRNA_binding	14	0	0	1	1
GO:0017075_syntaxin-1_binding	26	0	0	1	1
GO:0017080_sodium_channel_regulator_activity	34	0	0	1	1
GO:0017108_5'-flap_endonuclease_activity	9	0	0	1	1
GO:0017112_Rab_guanyl-nucleotide_exchange_factor_activity	33	0	0	1	1
GO:0017116_single-stranded_DNA_helicase_activity	15	0	0	1	1
GO:0017124_SH3_domain_binding	131	0	0	1	1
GO:0017128_phospholipid_scramblase_activity	10	0	0	1	1
GO:0017134_fibroblast_growth_factor_binding	23	0	0	1	1
GO:0017137_Rab_GTPase_binding	150	0	0	1	1
GO:0017147_Wnt-protein_binding	30	3.33	51.19	0.0210651	1	SFRP4
GO:0017154_semaphorin_receptor_activity	12	0	0	1	1
GO:0017160_Ral_GTPase_binding	12	0	0	1	1
GO:0017166_vinculin_binding	11	0	0	1	1
GO:0018024_histone-lysine_N-methyltransferase_activity	18	0	0	1	1
GO:0019003_GDP_binding	73	0	0	1	1
GO:0019104_DNA_N-glycosylase_activity	9	0	0	1	1
GO:0019213_deacetylase_activity	14	0	0	1	1
GO:0019215_intermediate_filament_binding	10	0	0	1	1
GO:0019531_oxalate_transmembrane_transporter_activity	10	0	0	1	1
GO:0019706_protein-cysteine_S-palmitoyltransferase_activity	28	0	0	1	1
GO:0019789_SUMO_transferase_activity	16	0	0	1	1
GO:0019825_oxygen_binding	33	0	0	1	1
GO:0019829_ATPase-coupled_cation_transmembrane_transporter_activity	14	0	0	1	1
GO:0019838_growth_factor_binding	31	0	0	1	1
GO:0019841_retinol_binding	13	0	0	1	1
GO:0019843_rRNA_binding	40	0	0	1	1
GO:0019855_calcium_channel_inhibitor_activity	11	0	0	1	1
GO:0019864_IgG_binding	11	0	0	1	1
GO:0019869_chloride_channel_inhibitor_activity	10	0	0	1	1
GO:0019871_sodium_channel_inhibitor_activity	8	0	0	1	1
GO:0019887_protein_kinase_regulator_activity	13	0	0	1	1
GO:0019888_protein_phosphatase_regulator_activity	36	0	0	1	1
GO:0019894_kinesin_binding	43	0	0	1	1
GO:0019899_enzyme_binding	360	0	0	1	1
GO:0019900_kinase_binding	97	0	0	1	1
GO:0019901_protein_kinase_binding	463	0	0	1	1
GO:0019902_phosphatase_binding	49	0	0	1	1
GO:0019903_protein_phosphatase_binding	86	0	0	1	1
GO:0019904_protein_domain_specific_binding	252	0.4	5.87	0.164381	1	HPCAL4
GO:0019905_syntaxin_binding	60	0	0	1	1
GO:0019911_structural_constituent_of_myelin_sheath	10	0	0	1	1
GO:0019955_cytokine_binding	41	0	0	1	1
GO:0019956_chemokine_binding	25	4	61.8	0.0175837	1	PDPN
GO:0019957_C-C_chemokine_binding	24	0	0	1	1
GO:0019992_diacylglycerol_binding	12	0	0	1	1
GO:0020037_heme_binding	138	0	0	1	1
GO:0022841_potassium_ion_leak_channel_activity	16	0	0	1	1
GO:0022848_acetylcholine-gated_cation-selective_channel_activity	16	0	0	1	1
GO:0022851_GABA-gated_chloride_ion_channel_activity	13	0	0	1	1
GO:0022857_transmembrane_transporter_activity	98	0	0	1	1
GO:0023026_MHC_class_II_protein_complex_binding	16	0	0	1	1
GO:0030020_extracellular_matrix_structural_constituent_conferring_tensile_strength	41	0	0	1	1
GO:0030021_extracellular_matrix_structural_constituent_conferring_compression_resistance	16	0	0	1	1
GO:0030023_extracellular_matrix_constituent_conferring_elasticity	9	0	0	1	1
GO:0030145_manganese_ion_binding	64	0	0	1	1
GO:0030159_signaling_receptor_complex_adaptor_activity	29	0	0	1	1
GO:0030165_PDZ_domain_binding	85	0	0	1	1
GO:0030169_low-density_lipoprotein_particle_binding	17	0	0	1	1
GO:0030170_pyridoxal_phosphate_binding	55	0	0	1	1
GO:0030215_semaphorin_receptor_binding	23	0	0	1	1
GO:0030234_enzyme_regulator_activity	26	0	0	1	1
GO:0030246_carbohydrate_binding	172	0	0	1	1
GO:0030247_polysaccharide_binding	13	0	0	1	1
GO:0030276_clathrin_binding	43	0	0	1	1
GO:0030280_structural_constituent_of_skin_epidermis	14	0	0	1	1
GO:0030295_protein_kinase_activator_activity	28	0	0	1	1
GO:0030331_estrogen_receptor_binding	42	0	0	1	1
GO:0030332_cyclin_binding	30	0	0	1	1
GO:0030371_translation_repressor_activity	12	0	0	1	1
GO:0030374_nuclear_receptor_transcription_coactivator_activity	52	0	0	1	1
GO:0030414_peptidase_inhibitor_activity	13	0	0	1	1
GO:0030506_ankyrin_binding	20	0	0	1	1
GO:0030507_spectrin_binding	28	0	0	1	1
GO:0030515_snoRNA_binding	19	0	0	1	1
GO:0030544_Hsp70_protein_binding	42	0	0	1	1
GO:0030552_cAMP_binding	23	0	0	1	1
GO:0030553_cGMP_binding	15	0	0	1	1
GO:0030594_neurotransmitter_receptor_activity	80	1.25	18.77	0.0552422	1	GLRA1
GO:0030621_U4_snRNA_binding	11	0	0	1	1
GO:0030627_pre-mRNA_5'-splice_site_binding	20	0	0	1	1
GO:0030674_protein-macromolecule_adaptor_activity	76	0	0	1	1
GO:0030676_Rac_guanyl-nucleotide_exchange_factor_activity	19	0	0	1	1
GO:0030695_GTPase_regulator_activity	16	0	0	1	1
GO:0030742_GTP-dependent_protein_binding	23	0	0	1	1
GO:0030881_beta-2-microglobulin_binding	8	0	0	1	1
GO:0030898_actin-dependent_ATPase_activity	24	0	0	1	1
GO:0030955_potassium_ion_binding	12	0	0	1	1
GO:0030971_receptor_tyrosine_kinase_binding	60	0	0	1	1
GO:0030983_mismatched_DNA_binding	9	0	0	1	1
GO:0031005_filamin_binding	13	0	0	1	1
GO:0031072_heat_shock_protein_binding	64	0	0	1	1
GO:0031210_phosphatidylcholine_binding	28	0	0	1	1
GO:0031267_small_GTPase_binding	20	0	0	1	1
GO:0031369_translation_initiation_factor_binding	22	0	0	1	1
GO:0031386_protein_tag	12	0	0	1	1
GO:0031404_chloride_ion_binding	13	0	0	1	1
GO:0031418_L-ascorbic_acid_binding	20	0	0	1	1
GO:0031419_cobalamin_binding	10	0	0	1	1
GO:0031432_titin_binding	14	0	0	1	1
GO:0031434_mitogen-activated_protein_kinase_kinase_binding	13	0	0	1	1
GO:0031435_mitogen-activated_protein_kinase_kinase_kinase_binding	18	0	0	1	1
GO:0031489_myosin_V_binding	17	0	0	1	1
GO:0031490_chromatin_DNA_binding	69	1.45	21.81	0.0478217	1	GRHL3
GO:0031491_nucleosome_binding	26	0	0	1	1
GO:0031492_nucleosomal_DNA_binding	39	0	0	1	1
GO:0031593_polyubiquitin_modification-dependent_protein_binding	31	0	0	1	1
GO:0031624_ubiquitin_conjugating_enzyme_binding	33	0	0	1	1
GO:0031625_ubiquitin_protein_ligase_binding	296	0	0	1	1
GO:0031681_G-protein_beta-subunit_binding	20	0	0	1	1
GO:0031683_G-protein_beta/gamma-subunit_complex_binding	20	0	0	1	1
GO:0031720_haptoglobin_binding	10	0	0	1	1
GO:0031957_very_long-chain_fatty_acid-CoA_ligase_activity	9	11.11	183.8	0.00636419	1	ACSBG1
GO:0031994_insulin-like_growth_factor_I_binding	13	0	0	1	1
GO:0031995_insulin-like_growth_factor_II_binding	8	0	0	1	1
GO:0031996_thioesterase_binding	11	0	0	1	1
GO:0032052_bile_acid_binding	9	0	0	1	1
GO:0032183_SUMO_binding	10	0	0	1	1
GO:0032266_phosphatidylinositol-3-phosphate_binding	48	0	0	1	1
GO:0032395_MHC_class_II_receptor_activity	9	0	0	1	1
GO:0032452_histone_demethylase_activity	14	0	0	1	1
GO:0032454_histone_demethylase_activity_(H3-K9_specific)	13	0	0	1	1
GO:0032794_GTPase_activating_protein_binding	14	0	0	1	1
GO:0032934_sterol_binding	16	0	0	1	1
GO:0033038_bitter_taste_receptor_activity	20	0	0	1	1
GO:0033130_acetylcholine_receptor_binding	12	0	0	1	1
GO:0033192_calmodulin-dependent_protein_phosphatase_activity	5	0	0	1	1
GO:0033204_ribonuclease_P_RNA_binding	10	0	0	1	1
GO:0033558_protein_deacetylase_activity	11	0	0	1	1
GO:0033613_activating_transcription_factor_binding	34	0	0	1	1
GO:0033691_sialic_acid_binding	22	0	0	1	1
GO:0034185_apolipoprotein_binding	16	0	0	1	1
GO:0034236_protein_kinase_A_catalytic_subunit_binding	13	0	0	1	1
GO:0034237_protein_kinase_A_regulatory_subunit_binding	26	0	0	1	1
GO:0034450_ubiquitin-ubiquitin_ligase_activity	13	0	0	1	1
GO:0034452_dynactin_binding	12	0	0	1	1
GO:0034713_type_I_transforming_growth_factor_beta_receptor_binding	9	0	0	1	1
GO:0034987_immunoglobulin_receptor_binding	7	0	0	1	1
GO:0035035_histone_acetyltransferase_binding	28	0	0	1	1
GO:0035064_methylated_histone_binding	63	0	0	1	1
GO:0035091_phosphatidylinositol_binding	82	0	0	1	1
GO:0035197_siRNA_binding	10	0	0	1	1
GO:0035198_miRNA_binding	32	0	0	1	1
GO:0035252_UDP-xylosyltransferase_activity	8	0	0	1	1
GO:0035255_ionotropic_glutamate_receptor_binding	28	0	0	1	1
GO:0035257_nuclear_hormone_receptor_binding	25	0	0	1	1
GO:0035259_glucocorticoid_receptor_binding	15	0	0	1	1
GO:0035497_cAMP_response_element_binding	14	0	0	1	1
GO:0035529_NADH_pyrophosphatase_activity	9	0	0	1	1
GO:0035591_signaling_adaptor_activity	23	0	0	1	1
GO:0035613_RNA_stem-loop_binding	13	0	0	1	1
GO:0035615_clathrin_adaptor_activity	16	0	0	1	1
GO:0035925_mRNA_3'-UTR_AU-rich_region_binding	26	0	0	1	1
GO:0036002_pre-mRNA_binding	15	0	0	1	1
GO:0036094_small_molecule_binding	12	0	0	1	1
GO:0036122_BMP_binding	13	0	0	1	1
GO:0036310_annealing_helicase_activity	7	0	0	1	1
GO:0036312_phosphatidylinositol_3-kinase_regulatory_subunit_binding	10	0	0	1	1
GO:0038023_signaling_receptor_activity	215	0	0	1	1
GO:0038024_cargo_receptor_activity	14	0	0	1	1
GO:0038187_pattern_recognition_receptor_activity	13	0	0	1	1
GO:0039706_co-receptor_binding	13	0	0	1	1
GO:0042030_ATPase_inhibitor_activity	5	0	0	1	1
GO:0042043_neurexin_family_protein_binding	14	0	0	1	1
GO:0042054_histone_methyltransferase_activity	19	0	0	1	1
GO:0042056_chemoattractant_activity	35	0	0	1	1
GO:0042162_telomeric_DNA_binding	25	0	0	1	1
GO:0042166_acetylcholine_binding	13	0	0	1	1
GO:0042169_SH2_domain_binding	41	0	0	1	1
GO:0042277_peptide_binding	62	0	0	1	1
GO:0042287_MHC_protein_binding	3	0	0	1	1
GO:0042288_MHC_class_I_protein_binding	22	0	0	1	1
GO:0042289_MHC_class_II_protein_binding	6	0	0	1	1
GO:0042301_phosphate_ion_binding	12	0	0	1	1
GO:0042392_sphingosine-1-phosphate_phosphatase_activity	7	0	0	1	1
GO:0042393_histone_binding	164	0.61	9.07	0.110129	1	SAMD11
GO:0042500_aspartic_endopeptidase_activity,_intramembrane_cleaving	7	0	0	1	1
GO:0042562_hormone_binding	12	0	0	1	1
GO:0042577_lipid_phosphatase_activity	13	0	0	1	1
GO:0042605_peptide_antigen_binding	23	0	0	1	1
GO:0042609_CD4_receptor_binding	9	0	0	1	1
GO:0042626_ATPase-coupled_transmembrane_transporter_activity	44	0	0	1	1
GO:0042800_histone_methyltransferase_activity_(H3-K4_specific)	17	0	0	1	1
GO:0042802_identical_protein_binding	1465	0.14	2.04	0.278798	1	CRYAB;GLRA1
GO:0042803_protein_homodimerization_activity	655	0.15	2.22	0.375215	1	CRYAB
GO:0042805_actinin_binding	12	0	0	1	1
GO:0042809_vitamin_D_receptor_binding	15	0	0	1	1
GO:0042813_Wnt-activated_receptor_activity	15	0	0	1	1
GO:0042826_histone_deacetylase_binding	115	0	0	1	1
GO:0042834_peptidoglycan_binding	17	0	0	1	1
GO:0042910_xenobiotic_transmembrane_transporter_activity	21	0	0	1	1
GO:0042923_neuropeptide_binding	24	0	0	1	1
GO:0042974_retinoic_acid_receptor_binding	13	0	0	1	1
GO:0042975_peroxisome_proliferator_activated_receptor_binding	12	0	0	1	1
GO:0043014_alpha-tubulin_binding	37	0	0	1	1
GO:0043015_gamma-tubulin_binding	28	0	0	1	1
GO:0043021_ribonucleoprotein_complex_binding	34	0	0	1	1
GO:0043022_ribosome_binding	53	0	0	1	1
GO:0043023_ribosomal_large_subunit_binding	12	0	0	1	1
GO:0043024_ribosomal_small_subunit_binding	17	0	0	1	1
GO:0043027_cysteine-type_endopeptidase_inhibitor_activity_involved_in_apoptotic_process	25	0	0	1	1
GO:0043130_ubiquitin_binding	75	0	0	1	1
GO:0043138_3'-5'_DNA_helicase_activity	17	0	0	1	1
GO:0043177_organic_acid_binding	11	0	0	1	1
GO:0043184_vascular_endothelial_growth_factor_receptor_2_binding	9	0	0	1	1
GO:0043236_laminin_binding	25	0	0	1	1
GO:0043274_phospholipase_binding	15	0	0	1	1
GO:0043295_glutathione_binding	12	0	0	1	1
GO:0043325_phosphatidylinositol-3,4-bisphosphate_binding	30	0	0	1	1
GO:0043394_proteoglycan_binding	14	0	0	1	1
GO:0043395_heparan_sulfate_proteoglycan_binding	16	6.25	98.69	0.0112876	1	FST
GO:0043422_protein_kinase_B_binding	11	0	0	1	1
GO:0043425_bHLH_transcription_factor_binding	26	0	0	1	1
GO:0043495_protein-membrane_adaptor_activity	18	0	0	1	1
GO:0043522_leucine_zipper_domain_binding	11	0	0	1	1
GO:0043531_ADP_binding	38	0	0	1	1
GO:0043539_protein_serine/threonine_kinase_activator_activity	30	0	0	1	1
GO:0043548_phosphatidylinositol_3-kinase_binding	21	0	0	1	1
GO:0043560_insulin_receptor_substrate_binding	10	0	0	1	1
GO:0043565_sequence-specific_DNA_binding	309	0.32	4.77	0.197834	1	GRHL3
GO:0043621_protein_self-association	57	0	0	1	1
GO:0043995_histone_acetyltransferase_activity_(H4-K5_specific)	9	0	0	1	1
GO:0043996_histone_acetyltransferase_activity_(H4-K8_specific)	9	0	0	1	1
GO:0044183_protein_folding_chaperone	27	0	0	1	1
GO:0044325_ion_channel_binding	132	0.76	11.3	0.0895856	1	HAP1
GO:0044389_ubiquitin-like_protein_ligase_binding	23	0	0	1	1
GO:0044548_S100_protein_binding	14	0	0	1	1
GO:0044877_protein-containing_complex_binding	352	0.57	8.88	0.0253908	1	CRYAB;GLRA1
GO:0045028_G_protein-coupled_purinergic_nucleotide_receptor_activity	12	0	0	1	1
GO:0045182_translation_regulator_activity	16	0	0	1	1
GO:0045236_CXCR_chemokine_receptor_binding	15	0	0	1	1
GO:0045294_alpha-catenin_binding	10	0	0	1	1
GO:0045295_gamma-catenin_binding	12	0	0	1	1
GO:0045296_cadherin_binding	315	0	0	1	1
GO:0045499_chemorepellent_activity	28	0	0	1	1
GO:0045503_dynein_light_chain_binding	10	0	0	1	1
GO:0045504_dynein_heavy_chain_binding	14	0	0	1	1
GO:0045505_dynein_intermediate_chain_binding	30	0	0	1	1
GO:0046332_SMAD_binding	49	0	0	1	1
GO:0046790_virion_binding	12	0	0	1	1
GO:0046872_metal_ion_binding	2301	0.04	0.59	0.818486	1	CRYAB
GO:0046875_ephrin_receptor_binding	27	0	0	1	1
GO:0046914_transition_metal_ion_binding	19	0	0	1	1
GO:0046920_alpha-(1->3)-fucosyltransferase_activity	8	0	0	1	1
GO:0046933_proton-transporting_ATP_synthase_activity,_rotational_mechanism	18	0	0	1	1
GO:0046935_1-phosphatidylinositol-3-kinase_regulator_activity	16	0	0	1	1
GO:0046961_proton-transporting_ATPase_activity,_rotational_mechanism	20	0	0	1	1
GO:0046965_retinoid_X_receptor_binding	18	0	0	1	1
GO:0046966_thyroid_hormone_receptor_binding	30	0	0	1	1
GO:0046972_histone_acetyltransferase_activity_(H4-K16_specific)	10	0	0	1	1
GO:0046974_histone_methyltransferase_activity_(H3-K9_specific)	10	0	0	1	1
GO:0046975_histone_methyltransferase_activity_(H3-K36_specific)	12	0	0	1	1
GO:0046982_protein_heterodimerization_activity	317	0	0	1	1
GO:0046983_protein_dimerization_activity	140	0	0	1	1
GO:0047184_1-acylglycerophosphocholine_O-acyltransferase_activity	5	0	0	1	1
GO:0047372_acylglycerol_lipase_activity	13	0	0	1	1
GO:0047485_protein_N-terminus_binding	104	0	0	1	1
GO:0047498_calcium-dependent_phospholipase_A2_activity	16	0	0	1	1
GO:0047555_3',5'-cyclic-GMP_phosphodiesterase_activity	10	0	0	1	1
GO:0047617_acyl-CoA_hydrolase_activity	15	0	0	1	1
GO:0047676_arachidonate-CoA_ligase_activity	11	0	0	1	1
GO:0047844_deoxycytidine_deaminase_activity	8	0	0	1	1
GO:0048018_receptor_ligand_activity	36	0	0	1	1
GO:0048019_receptor_antagonist_activity	22	0	0	1	1
GO:0048020_CCR_chemokine_receptor_binding	29	0	0	1	1
GO:0048027_mRNA_5'-UTR_binding	26	0	0	1	1
GO:0048038_quinone_binding	12	0	0	1	1
GO:0048156_tau_protein_binding	45	0	0	1	1
GO:0048185_activin_binding	15	6.67	105.88	0.0105856	1	FST
GO:0048306_calcium-dependent_protein_binding	83	0	0	1	1
GO:0048365_Rac_GTPase_binding	58	0	0	1	1
GO:0048407_platelet-derived_growth_factor_binding	11	0	0	1	1
GO:0048487_beta-tubulin_binding	37	0	0	1	1
GO:0048495_Roundabout_binding	8	0	0	1	1
GO:0050072_m7G(5')pppN_diphosphatase_activity	8	0	0	1	1
GO:0050135_NAD(P)+_nucleosidase_activity	16	0	0	1	1
GO:0050291_sphingosine_N-acyltransferase_activity	7	0	0	1	1
GO:0050321_tau-protein_kinase_activity	22	0	0	1	1
GO:0050431_transforming_growth_factor_beta_binding	23	0	0	1	1
GO:0050660_flavin_adenine_dinucleotide_binding	58	0	0	1	1
GO:0050661_NADP_binding	38	0	0	1	1
GO:0050681_androgen_receptor_binding	28	0	0	1	1
GO:0050699_WW_domain_binding	31	0	0	1	1
GO:0050700_CARD_domain_binding	16	0	0	1	1
GO:0050750_low-density_lipoprotein_particle_receptor_binding	21	0	0	1	1
GO:0050786_RAGE_receptor_binding	11	0	0	1	1
GO:0050811_GABA_receptor_binding	17	0	0	1	1
GO:0050839_cell_adhesion_molecule_binding	65	0	0	1	1
GO:0050840_extracellular_matrix_binding	29	3.45	53	0.0203697	1	SPP1
GO:0050998_nitric-oxide_synthase_binding	14	0	0	1	1
GO:0051010_microtubule_plus-end_binding	20	0	0	1	1
GO:0051011_microtubule_minus-end_binding	12	0	0	1	1
GO:0051015_actin_filament_binding	206	0	0	1	1
GO:0051018_protein_kinase_A_binding	24	0	0	1	1
GO:0051019_mitogen-activated_protein_kinase_binding	29	0	0	1	1
GO:0051020_GTPase_binding	34	0	0	1	1
GO:0051059_NF-kappaB_binding	31	0	0	1	1
GO:0051082_unfolded_protein_binding	112	0.89	13.34	0.076519	1	CRYAB
GO:0051087_chaperone_binding	104	0.96	14.38	0.0712428	1	PDPN
GO:0051117_ATPase_binding	88	0	0	1	1
GO:0051213_dioxygenase_activity	23	0	0	1	1
GO:0051219_phosphoprotein_binding	35	0	0	1	1
GO:0051287_NAD_binding	39	0	0	1	1
GO:0051371_muscle_alpha-actinin_binding	15	0	0	1	1
GO:0051378_serotonin_binding	12	0	0	1	1
GO:0051393_alpha-actinin_binding	15	0	0	1	1
GO:0051428_peptide_hormone_receptor_binding	10	0	0	1	1
GO:0051536_iron-sulfur_cluster_binding	11	0	0	1	1
GO:0051537_2_iron,_2_sulfur_cluster_binding	21	0	0	1	1
GO:0051539_4_iron,_4_sulfur_cluster_binding	42	0	0	1	1
GO:0051721_protein_phosphatase_2A_binding	32	0	0	1	1
GO:0051787_misfolded_protein_binding	27	0	0	1	1
GO:0051864_histone_demethylase_activity_(H3-K36_specific)	10	0	0	1	1
GO:0051879_Hsp90_protein_binding	42	0	0	1	1
GO:0051959_dynein_light_intermediate_chain_binding	27	0	0	1	1
GO:0052629_phosphatidylinositol-3,5-bisphosphate_3-phosphatase_activity	7	0	0	1	1
GO:0052650_NADP-retinol_dehydrogenase_activity	12	0	0	1	1
GO:0052689_carboxylic_ester_hydrolase_activity	28	0	0	1	1
GO:0052739_phosphatidylserine_1-acylhydrolase_activity	11	0	0	1	1
GO:0052742_phosphatidylinositol_kinase_activity	12	0	0	1	1
GO:0060090_molecular_adaptor_activity	75	0	0	1	1
GO:0061578_Lys63-specific_deubiquitinase_activity	12	0	0	1	1
GO:0061608_nuclear_import_signal_receptor_activity	20	0	0	1	1
GO:0061630_ubiquitin_protein_ligase_activity	286	0	0	1	1
GO:0061631_ubiquitin_conjugating_enzyme_activity	42	0	0	1	1
GO:0061665_SUMO_ligase_activity	8	0	0	1	1
GO:0061809_NAD+_nucleotidase,_cyclic_ADP-ribose_generating	16	0	0	1	1
GO:0070006_metalloaminopeptidase_activity	24	0	0	1	1
GO:0070016_armadillo_repeat_domain_binding	10	0	0	1	1
GO:0070034_telomerase_RNA_binding	22	0	0	1	1
GO:0070063_RNA_polymerase_binding	18	0	0	1	1
GO:0070064_proline-rich_region_binding	18	0	0	1	1
GO:0070122_isopeptidase_activity	12	0	0	1	1
GO:0070182_DNA_polymerase_binding	20	0	0	1	1
GO:0070273_phosphatidylinositol-4-phosphate_binding	30	0	0	1	1
GO:0070300_phosphatidic_acid_binding	19	0	0	1	1
GO:0070330_aromatase_activity	25	0	0	1	1
GO:0070402_NADPH_binding	15	0	0	1	1
GO:0070403_NAD+_binding	14	0	0	1	1
GO:0070410_co-SMAD_binding	12	0	0	1	1
GO:0070411_I-SMAD_binding	14	0	0	1	1
GO:0070412_R-SMAD_binding	23	4.35	67.5	0.0161878	1	LDLRAD4
GO:0070491_repressing_transcription_factor_binding	43	0	0	1	1
GO:0070492_oligosaccharide_binding	11	0	0	1	1
GO:0070530_K63-linked_polyubiquitin_modification-dependent_protein_binding	21	0	0	1	1
GO:0070577_lysine-acetylated_histone_binding	22	0	0	1	1
GO:0070628_proteasome_binding	17	0	0	1	1
GO:0070679_inositol_1,4,5_trisphosphate_binding	13	0	0	1	1
GO:0070700_BMP_receptor_binding	13	0	0	1	1
GO:0070740_tubulin-glutamic_acid_ligase_activity	10	0	0	1	1
GO:0070742_C2H2_zinc_finger_domain_binding	15	0	0	1	1
GO:0070840_dynein_complex_binding	23	0	0	1	1
GO:0070851_growth_factor_receptor_binding	10	0	0	1	1
GO:0070888_E-box_binding	50	0	0	1	1
GO:0071723_lipopeptide_binding	9	0	0	1	1
GO:0071837_HMG_box_domain_binding	16	0	0	1	1
GO:0071889_14-3-3_protein_binding	32	0	0	1	1
GO:0071933_Arp2/3_complex_binding	14	0	0	1	1
GO:0071949_FAD_binding	33	0	0	1	1
GO:0072542_protein_phosphatase_activator_activity	11	0	0	1	1
GO:0080025_phosphatidylinositol-3,5-bisphosphate_binding	28	0	0	1	1
GO:0089720_caspase_binding	12	0	0	1	1
GO:0097110_scaffold_protein_binding	60	0	0	1	1
GO:0097153_cysteine-type_endopeptidase_activity_involved_in_apoptotic_process	10	0	0	1	1
GO:0097157_pre-mRNA_intronic_binding	11	0	0	1	1
GO:0097199_cysteine-type_endopeptidase_activity_involved_in_apoptotic_signaling_pathway	10	0	0	1	1
GO:0097200_cysteine-type_endopeptidase_activity_involved_in_execution_phase_of_apoptosis	9	0	0	1	1
GO:0097602_cullin_family_protein_binding	25	0	0	1	1
GO:0097718_disordered_domain_specific_binding	33	0	0	1	1
GO:0098505_G-rich_strand_telomeric_DNA_binding	10	0	0	1	1
GO:0098632_cell-cell_adhesion_mediator_activity	22	0	0	1	1
GO:0098641_cadherin_binding_involved_in_cell-cell_adhesion	18	0	0	1	1
GO:0101020_estrogen_16-alpha-hydroxylase_activity	8	0	0	1	1
GO:0102567_phospholipase_A2_activity_(consuming_1,2-dipalmitoylphosphatidylcholine)	26	0	0	1	1
GO:0102568_phospholipase_A2_activity_consuming_1,2-dioleoylphosphatidylethanolamine)	26	0	0	1	1
GO:0102991_myristoyl-CoA_hydrolase_activity	12	0	0	1	1
GO:0120020_cholesterol_transfer_activity	20	0	0	1	1
GO:1901612_cardiolipin_binding	11	0	0	1	1
GO:1901981_phosphatidylinositol_phosphate_binding	16	0	0	1	1
GO:1902282_voltage-gated_potassium_channel_activity_involved_in_ventricular_cardiac_muscle_cell_action_potential_repolarization	12	0	0	1	1
GO:1903231_mRNA_binding_involved_in_posttranscriptional_gene_silencing	274	0	0	1	1
GO:1904047_S-adenosyl-L-methionine_binding	16	0	0	1	1
GO:1904315_transmitter-gated_ion_channel_activity_involved_in_regulation_of_postsynaptic_membrane_potential	35	2.86	43.64	0.0245348	1	GLRA1
GO:1990247_N6-methyladenosine-containing_RNA_binding	7	0	0	1	1
GO:1990380_Lys48-specific_deubiquitinase_activity	16	0	0	1	1
GO:1990381_ubiquitin-specific_protease_binding	20	0	0	1	1
GO:1990404_protein_ADP-ribosylase_activity	16	0	0	1	1
GO:1990459_transferrin_receptor_binding	11	0	0	1	1
GO:1990756_ubiquitin_ligase-substrate_adaptor_activity	14	0	0	1	1
GO:1990782_protein_tyrosine_kinase_binding	30	0	0	1	1
GO:1990825_sequence-specific_mRNA_binding	12	0	0	1	1
GO:1990837_sequence-specific_double-stranded_DNA_binding	556	0	0	1	1
GO:1990841_promoter-specific_chromatin_binding	58	0	0	1	1

## Sheet: BP_24hrs - ORA_T4Mt24_vs_NIt24-
ORA_T4Mt24_vs_NIt24-BP_all
geneset	NGenes	pctDE	OR	pvalue	FDR	external_gene_name.DE
GO:0006281_DNA_repair	223	8.52	6.2	2.06887e-09	6.01008e-06	XRCC3;FANCG;UHRF1;FANCA;DDX11;KIF22;PNKP;UBQLN4;PPP5C;CHAF1B;CHAF1A;RAD54L;MUTYH;ATRIP;MRNIP;INTS3;RAD9A;MMS19;RRM2B
GO:0000727_double-strand_break_repair_via_break-induced_replication	12	50	64.89	1.08856e-08	1.58113e-05	MCM5;MCM3;MCM2;GINS2;MCM7;MCM4
GO:0006260_DNA_replication	130	9.23	6.68	8.37955e-07	0.000811419	MCM5;MCM3;MCM2;CHAF1B;CHAF1A;MCM7;MCM4;ATRIP;POLE;ING5;RAD9A;TOP3A
GO:0000278_mitotic_cell_cycle	134	8.96	6.46	1.15933e-06	0.000820526	TUBB;CDC25B;PKMYT1;KIF22;PLK1;KIF18B;PPP5C;TUBA1B;CENPT;POLE;TUBB4B;PHF13
GO:0006986_response_to_unfolded_protein	53	15.09	11.59	1.41226e-06	0.000820526	HSPH1;HSPA4L;HSPA1A;HSP90AA1;HSPA8;DNAJA1;DNAJB1;HSPD1
GO:0045944_positive_regulation_of_transcription_by_RNA_polymerase_II	1124	3.38	2.37	5.35214e-06	0.00259133	NAMPT;CXCL10;RELB;NFATC2;NFKBIA;ATF3;F2RL1;E2F1;UHRF1;CRTC2;NFKB2;E2F2;PRRX1;STAT5B;ID4;NHLH1;CALCOCO1;PATZ1;NFATC2IP;BMP7;NR4A3;SIRT2;HES5;RAF1;DVL2;MYCN;NCOA7;MEIS3;RFX5;VSX2;SSBP3;SRF;BMPR1A;RELA;PAX6;HYAL2;LMO1;TFDP1
GO:0000122_negative_regulation_of_transcription_by_RNA_polymerase_II	894	3.58	2.49	9.88329e-06	0.00410157	RELB;NFATC2;ATF3;CBX2;E2F1;UHRF1;DNAJC17;MDM2;E2F2;PLK1;PRRX1;PDE2A;HDAC7;ID4;DNAJB1;MXD4;TXNIP;NR4A3;ID2;SIRT2;HES5;AURKB;ZNF692;RFX5;VSX2;PIAS3;RELA;MXD3;PAX6;LMO1;CC2D1B;EDNRB
GO:1900034_regulation_of_cellular_response_to_heat	77	10.39	7.55	2.43181e-05	0.00883049	HSPH1;HSPA1A;HSP90AA1;HSPA8;CHORDC1;DNAJB1;AAAS;NUP210
GO:0006271_DNA_strand_elongation_involved_in_DNA_replication	13	30.77	28.71	3.52769e-05	0.0093163	MCM3;GINS2;MCM7;MCM4
GO:0010389_regulation_of_G2/M_transition_of_mitotic_cell_cycle	80	10	7.24	3.21851e-05	0.0093163	DYNLL1;HSP90AA1;TUBB;SFI1;PLK1;HAUS5;CEP72;TUBB4B
GO:0045665_negative_regulation_of_neuron_differentiation	59	11.86	8.75	3.30706e-05	0.0093163	DDX6;ID4;BMP7;ID2;HES5;PAX6;DIXDC1
GO:0000086_G2/M_transition_of_mitotic_cell_cycle	133	7.52	5.31	4.16431e-05	0.0100811	DYNLL1;HSP90AA1;TUBB;CDC25B;PKMYT1;SFI1;PLK1;HAUS5;CEP72;TUBB4B
GO:0006270_DNA_replication_initiation	30	16.67	12.95	8.704e-05	0.0194501	MCM5;MCM3;MCM2;MCM7;POLE
GO:0097711_ciliary_basal_body-plasma_membrane_docking	95	8.42	5.98	0.000110498	0.0229283	DYNLL1;HSP90AA1;TUBB;SFI1;PLK1;HAUS5;CEP72;TUBB4B
GO:0000082_G1/S_transition_of_mitotic_cell_cycle	100	8	5.66	0.000158276	0.0306527	MCM5;MCM3;MCM2;ID4;MCM7;MCM4;POLE;CDK4
GO:0000070_mitotic_sister_chromatid_segregation	35	14.29	10.79	0.000186155	0.0318105	KLHL22;KIFC1;PLK1;KIF18B;WRAP73
GO:0042026_protein_refolding	19	21.05	17.23	0.00017775	0.0318105	HSPA1A;HSP90AA1;HSPA8;HSPD1
GO:0007010_cytoskeleton_organization	140	6.43	4.48	0.000327737	0.0488537	TNFAIP3;CCL2;MICAL1;THY1;PLD2;RANBP10;FGD3;NCKIPSD;BIN1
GO:0045746_negative_regulation_of_Notch_signaling_pathway	39	12.82	9.52	0.000313932	0.0488537	NFKBIA;TCIM;GDPD5;BEND6;BMP7
GO:0051301_cell_division	346	4.34	2.97	0.000336342	0.0488537	KLHL22;TUBB;MAU2;CDC25B;KIFC1;HAUS5;KIF18B;CDCA3;TUBA1B;TACC3;CENPT;PIMREG;SIRT2;PHF13;CDK4
GO:0010628_positive_regulation_of_gene_expression	427	3.98	2.73	0.000372192	0.0514866	HSPA1A;E2F1;MDM2;CXCL8;PDE2A;CNTN1;CALCOCO1;ACTA2;BMP7;ID2;AZU1;MYCN;PIAS3;PLP1;ACTG2;PIK3CB;PAX6
GO:1901222_regulation_of_NIK/NF-kappaB_signaling	10	30	27.62	0.000399547	0.0527584	NFKBIA;BIRC2;RELA
GO:0034097_response_to_cytokine	44	11.36	8.3	0.000556055	0.0621284	RELB;NFKB2;IL6ST;SRF;RELA
GO:0042493_response_to_drug	284	4.58	3.14	0.000497038	0.0621284	NFATC2;ICAM1;MDM2;ACACB;XRCC1;MTHFR;MCM7;TXNIP;RAD54L;MBD1;RELA;CDK4;HSPD1
GO:0048711_positive_regulation_of_astrocyte_differentiation	11	27.27	24.16	0.000543121	0.0621284	IL6ST;ID2;BIN1
GO:1905168_positive_regulation_of_double-strand_break_repair_via_homologous_recombination	11	27.27	24.16	0.000543121	0.0621284	FUS;MRNIP;MMS19
GO:0032495_response_to_muramyl_dipeptide	12	25	21.48	0.000715921	0.0705443	TNFAIP3;NFKBIA;RELA
GO:0036499_PERK-mediated_unfolded_protein_response	12	25	21.48	0.000715921	0.0705443	CCL2;ATF3;CXCL8
GO:0043066_negative_regulation_of_apoptotic_process	492	3.66	2.5	0.000683238	0.0705443	NFKBIA;TCIM;HSPA1A;BIRC3;DNAJA1;PLK1;STAT5B;IL6ST;BIRC2;HIP1R;UBE2O;AZU1;RAF1;SOCS2;DNAJC3;RELA;HSPD1;EDNRB
GO:0090305_nucleic_acid_phosphodiester_bond_hydrolysis	70	8.57	6.08	0.000728513	0.0705443	POLG;APEX2;PNKP;DXO;POLE;RAD9A
GO:0006457_protein_folding	163	5.52	3.8	0.000983519	0.0806539	HSPA4L;HSP90AA1;QSOX2;HSPA8;DNAJA1;PPIL2;CCT6B;QSOX1;HSPD1
GO:0007052_mitotic_spindle_organization	50	10	7.19	0.00100615	0.0806539	WDR62;TACC3;AURKB;TACC2;POC1A
GO:0007269_neurotransmitter_secretion	51	9.8	7.03	0.00110162	0.0806539	HSPA8;PPFIA4;TSPOAP1;STX1A;SYT4
GO:0022010_central_nervous_system_myelination	14	21.43	17.58	0.00115775	0.0806539	ID4;HES5;PLP1
GO:0032956_regulation_of_actin_cytoskeleton_organization	74	8.11	5.72	0.000977748	0.0806539	CDK10;ARHGAP44;CORO2B;HIP1R;ILK;DIXDC1
GO:0034605_cellular_response_to_heat	51	9.8	7.03	0.00110162	0.0806539	CXCL10;TCIM;HSPA1A;HSP90AA1;HSPD1
GO:0035810_positive_regulation_of_urine_volume	14	21.43	17.58	0.00115775	0.0806539	HAS2;HYAL2;EDNRB
GO:0048246_macrophage_chemotaxis	14	21.43	17.58	0.00115775	0.0806539	CCL2;AZU1;EDNRB
GO:0048715_negative_regulation_of_oligodendrocyte_differentiation	13	23.08	19.34	0.000920114	0.0806539	ID4;ID2;HES5
GO:0050678_regulation_of_epithelial_cell_proliferation	13	23.08	19.34	0.000920114	0.0806539	UHRF1;HES5;EDNRB
GO:0071168_protein_localization_to_chromatin	13	23.08	19.34	0.000920114	0.0806539	PLK1;MRNIP;LEMD2
GO:0071222_cellular_response_to_lipopolysaccharide	167	5.39	3.71	0.00116608	0.0806539	TNFAIP3;CXCL10;CCL2;ICAM1;CXCL3;CXCL8;RELA;CDK4;EDNRB
GO:0006974_cellular_response_to_DNA_damage_stimulus	239	4.6	3.15	0.00126271	0.0833678	NFATC2;XRCC3;FANCG;DDX11;UBQLN4;MCM7;ZMAT3;MRNIP;INTS3;RAD9A;MMS19
GO:0051085_chaperone_cofactor-dependent_protein_refolding	31	12.9	9.57	0.00124747	0.0833678	HSPH1;HSPA1A;HSPA8;DNAJB1
GO:0001707_mesoderm_formation	32	12.5	9.23	0.00140855	0.0884328	BMP7;NR4A3;SRF;BMPR1A
GO:0010738_regulation_of_protein_kinase_A_signaling	15	20	16.12	0.00143075	0.0884328	AKAP1;PJA2;AKAP5
GO:0035994_response_to_muscle_stretch	15	20	16.12	0.00143075	0.0884328	NFKBIA;RAF1;RELA
GO:0019221_cytokine-mediated_signaling_pathway	282	4.26	2.9	0.00150945	0.0913533	VCAM1;CXCL10;CCL2;ICAM1;HSP90AA1;HSPA8;CXCL8;STAT5B;IL6ST;STX1A;RELA;PIK3CB
GO:0007017_microtubule-based_process	33	12.12	8.91	0.00158358	0.0938837	TUBB;TUBA1B;GTSE1;TUBB4B
GO:0071347_cellular_response_to_interleukin-1	82	7.32	5.11	0.00166796	0.0969087	CCL2;ICAM1;HAS2;CXCL8;RELA;HYAL2
GO:0006268_DNA_unwinding_involved_in_DNA_replication	16	18.75	14.88	0.00174095	0.0972589	MCM2;MCM7;MCM4
GO:0031396_regulation_of_protein_ubiquitination	16	18.75	14.88	0.00174095	0.0972589	HSPA1A;HSP90AA1;UBQLN1
GO:0050727_regulation_of_inflammatory_response	84	7.14	4.98	0.00188729	0.103445	SELE;FANCA;BIRC3;BIRC2;SEMA7A;RELA
GO:0009409_response_to_cold	35	11.43	8.33	0.00197796	0.104472	CXCL10;HSP90AA1;ACADVL;HSPD1
GO:0016032_viral_process	454	3.52	2.39	0.001947	0.104472	DYNLL1;NFKBIA;E2F1;HSP90AA1;CRTC2;MDM2;HSPA8;DDX11;IL6ST;AAAS;BRD2;COPS7B;NUP210;RELA;HSPD1;BIN1
GO:0007099_centriole_replication	17	17.65	13.81	0.00209005	0.106519	WDR62;CNTROB;CEP72
GO:0050870_positive_regulation_of_T_cell_activation	17	17.65	13.81	0.00209005	0.106519	CCL2;THY1;HSPD1
GO:0045880_positive_regulation_of_smoothened_signaling_pathway	37	10.81	7.83	0.00243546	0.120056	PRRX1;ULK3;GAS8;STK36
GO:0048268_clathrin_coat_assembly	18	16.67	12.89	0.00247965	0.120056	EPS15;HIP1R;FCHO1
GO:0061028_establishment_of_endothelial_barrier	18	16.67	12.89	0.00247965	0.120056	ICAM1;F2RL1;PDE2A
GO:0007517_muscle_organ_development	90	6.67	4.63	0.00267731	0.126276	CXCL10;ITGA7;MAPK12;TAGLN;FXR1;BTBD1
GO:0045893_positive_regulation_of_transcription,_DNA-templated	558	3.23	2.19	0.00273852	0.126276	NFATC2;E2F1;ILF3;USP21;CALCOCO1;ACTA2;BMP7;ID2;HES5;ING5;CXXC1;MYCN;GPBP1;ILK;ANKRD49;RELA;MMS19;PAX6
GO:0051726_regulation_of_cell_cycle	121	5.79	3.98	0.00271843	0.126276	E2F1;HSPA8;E2F2;PLK1;BIRC2;SIRT2;CDK4
GO:0016925_protein_sumoylation	63	7.94	5.58	0.00283704	0.126794	MDM2;AAAS;NUP210;STX1A;PIAS3
GO:0045669_positive_regulation_of_osteoblast_differentiation	63	7.94	5.58	0.00283704	0.126794	IL6ST;DDR2;BMP7;ILK;BMPR1A
GO:0051321_meiotic_cell_cycle	65	7.69	5.39	0.00325182	0.14313	PKMYT1;RAD54L;SIRT2;REC8;TOP3A
GO:0006468_protein_phosphorylation	439	3.42	2.31	0.00354949	0.14769	CCL2;PASK;ILF3;CDC25B;PKMYT1;PLK1;CDK10;AURKB;RAF1;ILK;MAP3K19;MAPK6;STK36;BMPR1A;CDK4
GO:0007229_integrin-mediated_signaling_pathway	95	6.32	4.37	0.00350619	0.14769	ITGA7;ADAM11;THY1;ILK;SEMA7A;PLP1
GO:0007249_I-kappaB_kinase/NF-kappaB_signaling	66	7.58	5.3	0.0034748	0.14769	RELB;NFKBIA;BIRC3;BIRC2;RELA
GO:1901998_toxin_transport	41	9.76	6.98	0.00355881	0.14769	CRTC2;DNAJC17;GGA1;CCT6B
GO:0043065_positive_regulation_of_apoptotic_process	355	3.66	2.48	0.00362604	0.148361	E2F1;DNAJA1;ARHGEF1;BMP7;TXNIP;HIP1R;ZMAT3;ING5;FGD3;PLEKHG2;CDK4;HSPD1;BIN1
GO:0051131_chaperone-mediated_protein_complex_assembly	21	14.29	10.74	0.003906	0.157596	HSPA1A;HSP90AA1;HSPD1
GO:0007094_mitotic_spindle_assembly_checkpoint	22	13.64	10.18	0.00447167	0.16675	KLHL22;PLK1;AURKB
GO:0038061_NIK/NF-kappaB_signaling	70	7.14	4.97	0.00447727	0.16675	RELB;NFKB2;BIRC3;BIRC2;RELA
GO:0042127_regulation_of_cell_population_proliferation	166	4.82	3.29	0.00428333	0.16675	CXCL10;NFKBIA;FANCA;STAT5B;SLC7A11;TXNIP;EPS15;BIRC2
GO:0051443_positive_regulation_of_ubiquitin-protein_transferase_activity	22	13.64	10.18	0.00447167	0.16675	ARRDC3;PLK1;ARRDC4
GO:0051607_defense_response_to_virus	202	4.46	3.03	0.00421623	0.16675	CXCL10;F2RL1;ILF3;ABCF3;IFIT5;AZU1;DNAJC3;RELA;HYAL2
GO:0071356_cellular_response_to_tumor_necrosis_factor	132	5.3	3.63	0.00439904	0.16675	CCL2;ICAM1;HAS2;CXCL8;SMPD4;RELA;HYAL2
GO:0000226_microtubule_cytoskeleton_organization	134	5.22	3.57	0.00477408	0.166862	RNF19A;TUBB;TUBA1B;TACC3;TACC2;CUL9;TUBB4B
GO:0007049_cell_cycle	245	4.08	2.77	0.00486513	0.166862	UHRF1;APEX2;E2F2;CDCA3;CHAF1B;CHAF1A;TXNIP;PIMREG;RIOK2;MAPK6
GO:0007062_sister_chromatid_cohesion	23	13.04	9.66	0.00508439	0.166862	DDX11;KIF22;PLK1
GO:0010212_response_to_ionizing_radiation	44	9.09	6.46	0.00460159	0.166862	ICAM1;RAD54L;MRNIP;INTS3
GO:0030595_leukocyte_chemotaxis	23	13.04	9.66	0.00508439	0.166862	CXCL10;CXCL3;CXCL8
GO:0038096_Fc-gamma_receptor_signaling_pathway_involved_in_phagocytosis	71	7.04	4.9	0.00475695	0.166862	HSP90AA1;PLD2;PLA2G6;NCKIPSD;PIK3CB
GO:0043393_regulation_of_protein_binding	23	13.04	9.66	0.00508439	0.166862	PLK1;BTBD1;PRMT7
GO:0046777_protein_autophosphorylation	171	4.68	3.19	0.00511212	0.166862	PASK;THY1;EPHB3;DDR2;ULK3;AURKB;RIOK2;SLK
GO:0048589_developmental_growth	23	13.04	9.66	0.00508439	0.166862	PYGO2;SRF;BMPR1A
GO:0061024_membrane_organization	134	5.22	3.57	0.00477408	0.166862	HSPA8;SCARB2;EPS15;HIP1R;DVL2;FCHO1;BIN1
GO:0097150_neuronal_stem_cell_population_maintenance	23	13.04	9.66	0.00508439	0.166862	PRRX1;SRRT;HES5
GO:0001755_neural_crest_cell_migration	46	8.7	6.15	0.00540034	0.170506	SEMA4F;SEMA7A;SEMA4A;EDNRB
GO:0014070_response_to_organic_cyclic_compound	46	8.7	6.15	0.00540034	0.170506	NAMPT;ACACB;SLC7A11;EDNRB
GO:0032355_response_to_estradiol	104	5.77	3.96	0.00545854	0.170506	STAT5B;GGT7;BMP7;TXNIP;MBD1;SOCS2
GO:0032436_positive_regulation_of_proteasomal_ubiquitin-dependent_protein_catabolic_process	73	6.85	4.75	0.00535312	0.170506	RNF19A;HSPA1A;MDM2;PLK1;SIRT2
GO:0043154_negative_regulation_of_cysteine-type_endopeptidase_activity_involved_in_apoptotic_process	74	6.76	4.69	0.00567018	0.175233	MICAL1;BIRC3;MDM2;BIRC2;RAF1
GO:0090398_cellular_senescence	24	12.5	9.21	0.00574523	0.175683	ULK3;ID2;SRF
GO:0071353_cellular_response_to_interleukin-4	25	12	8.79	0.00645512	0.195335	MCM2;TUBA1B;CDK4
GO:0006954_inflammatory_response	383	3.39	2.29	0.00675892	0.202419	TNFAIP3;CXCL10;RELB;CCL2;CXCL3;SELE;F2RL1;CXCL8;AZU1;PJA2;SEMA7A;PLP1;RELA
GO:0043278_response_to_morphine	26	11.54	8.41	0.00721496	0.211712	MDM2;PPP5C;RELA
GO:0048843_negative_regulation_of_axon_extension_involved_in_axon_guidance	26	11.54	8.41	0.00721496	0.211712	SEMA4F;SEMA7A;SEMA4A
GO:0006264_mitochondrial_DNA_replication	9	22.22	18.37	0.00790376	0.22204	POLG;RRM2B
GO:0006699_bile_acid_biosynthetic_process	27	11.11	8.05	0.00802554	0.22204	OSBPL7;CYP39A1;CYP46A1
GO:0007411_axon_guidance	223	4.04	2.73	0.00791154	0.22204	SEMA4F;EPHB3;BMP7;NR4A3;IGSF9;SEMA7A;SEMA4A;PIK3CB;PAX6
GO:0010033_response_to_organic_substance	27	11.11	8.05	0.00802554	0.22204	XRCC3;XRCC1;RELA
GO:0010507_negative_regulation_of_autophagy	51	7.84	5.49	0.00778928	0.22204	NAMPT;KLHL22;WDR6;SIRT2
GO:2000369_regulation_of_clathrin-dependent_endocytosis	9	22.22	18.37	0.00790376	0.22204	HIP1R;PIK3CB
GO:0036297_interstrand_cross-link_repair	52	7.69	5.38	0.00833808	0.228511	XRCC3;FANCG;FANCA;ATRIP
GO:0045860_positive_regulation_of_protein_kinase_activity	53	7.55	5.27	0.0089116	0.241946	CDC25B;DDR2;MRNIP;AZU1
GO:0007159_leukocyte_cell-cell_adhesion	29	10.34	7.44	0.00980177	0.243369	VCAM1;ICAM1;SELE
GO:0010803_regulation_of_tumor_necrosis_factor-mediated_signaling_pathway	29	10.34	7.44	0.00980177	0.243369	TNFAIP3;BIRC3;BIRC2
GO:0030071_regulation_of_mitotic_metaphase/anaphase_transition	10	20	16.08	0.00977981	0.243369	PLK1;RIOK2
GO:0031053_primary_miRNA_processing	10	20	16.08	0.00977981	0.243369	DGCR8;SRRT
GO:0032757_positive_regulation_of_interleukin-8_production	54	7.41	5.16	0.00951025	0.243369	F2RL1;HSPA1A;RELA;HYAL2
GO:0042448_progesterone_metabolic_process	10	20	16.08	0.00977981	0.243369	STAT5B;CYP46A1
GO:0044344_cellular_response_to_fibroblast_growth_factor_stimulus	29	10.34	7.44	0.00980177	0.243369	CCL2;CXCL8;HYAL2
GO:0046677_response_to_antibiotic	29	10.34	7.44	0.00980177	0.243369	HSP90AA1;MDM2;HYAL2
GO:0085029_extracellular_matrix_assembly	10	20	16.08	0.00977981	0.243369	HAS2;QSOX1
GO:0090084_negative_regulation_of_inclusion_body_assembly	10	20	16.08	0.00977981	0.243369	HSPA1A;DNAJB1
GO:0000045_autophagosome_assembly	57	7.02	4.87	0.0114611	0.249081	WDR45;ATG9A;UBQLN1;VMP1
GO:0001578_microtubule_bundle_formation	31	9.68	6.9	0.0117888	0.249081	TRIM46;PLK1;AAAS
GO:0006048_UDP-N-acetylglucosamine_biosynthetic_process	11	18.18	14.3	0.0118324	0.249081	NAGK;UAP1L1
GO:0006284_base-excision_repair	30	10	7.16	0.0107687	0.249081	APEX2;XRCC1;MUTYH
GO:0006351_transcription,_DNA-templated	88	5.68	3.89	0.0115955	0.249081	E2F1;PPP5C;GPBP1;RELA;MMS19
GO:0006707_cholesterol_catabolic_process	11	18.18	14.3	0.0118324	0.249081	CYP39A1;CYP46A1
GO:0006977_DNA_damage_response,_signal_transduction_by_p53_class_mediator_resulting_in_cell_cycle_arrest	56	7.14	4.96	0.0107846	0.249081	E2F1;MDM2;GTSE1;TFDP1
GO:0007259_receptor_signaling_pathway_via_JAK-STAT	31	9.68	6.9	0.0117888	0.249081	CCL2;STAT5B;SOCS2
GO:0010800_positive_regulation_of_peptidyl-threonine_phosphorylation	30	10	7.16	0.0107687	0.249081	PLK1;BMP7;AZU1
GO:0014047_glutamate_secretion	30	10	7.16	0.0107687	0.249081	PPFIA4;TSPOAP1;STX1A
GO:0030534_adult_behavior	30	10	7.16	0.0107687	0.249081	SEPT5;SLC7A11;NR4A3
GO:0031397_negative_regulation_of_protein_ubiquitination	55	7.27	5.06	0.0101345	0.249081	TNFAIP3;HSPA1A;DNAJA1;U2AF2
GO:0036498_IRE1-mediated_unfolded_protein_response	56	7.14	4.96	0.0107846	0.249081	DDX11;ACADVL;CXXC1;DNAJC3
GO:0043200_response_to_amino_acid	31	9.68	6.9	0.0117888	0.249081	ICAM1;MTHFR;RELA
GO:0043276_anoikis	11	18.18	14.3	0.0118324	0.249081	E2F1;TFDP1
GO:0045931_positive_regulation_of_mitotic_cell_cycle	31	9.68	6.9	0.0117888	0.249081	CDC25B;MDM2;STAT5B
GO:0046718_viral_entry_into_host_cell	88	5.68	3.89	0.0115955	0.249081	ICAM1;HSPA1A;SCARB2;EPS15;HYAL2
GO:0051775_response_to_redox_state	11	18.18	14.3	0.0118324	0.249081	SLC7A11;SIRT2
GO:0070417_cellular_response_to_cold	11	18.18	14.3	0.0118324	0.249081	NFKBIA;DNAJC3
GO:0071456_cellular_response_to_hypoxia	122	4.92	3.35	0.0115739	0.249081	ICAM1;E2F1;MDM2;BMP7;SIRT2;UBQLN1
GO:0090136_epithelial_cell-cell_adhesion	11	18.18	14.3	0.0118324	0.249081	PLEKHA7;SRF
GO:0048661_positive_regulation_of_smooth_muscle_cell_proliferation	58	6.9	4.78	0.0121642	0.254223	NAMPT;NR4A3;ID2;HES5
GO:0000077_DNA_damage_checkpoint	32	9.38	6.66	0.0128626	0.260075	E2F1;ATRIP;RAD9A
GO:0001666_response_to_hypoxia	163	4.29	2.91	0.0133198	0.260075	XRCC1;MTHFR;EDNRA;BIRC2;RAF1;SRF;HSPD1
GO:0001779_natural_killer_cell_differentiation	12	16.67	12.86	0.0140557	0.260075	STAT5B;ID2
GO:0001952_regulation_of_cell-matrix_adhesion	12	16.67	12.86	0.0140557	0.260075	THY1;PIK3CB
GO:0006310_DNA_recombination	60	6.67	4.61	0.0136519	0.260075	XRCC3;APEX2;RAD54L;POLM
GO:0006914_autophagy	126	4.76	3.23	0.0134075	0.260075	WDR45;UBQLN4;ULK3;SIRT2;VMP1;PIK3CB
GO:0007193_adenylate_cyclase-inhibiting_G_protein-coupled_receptor_signaling_pathway	60	6.67	4.61	0.0136519	0.260075	PDE2A;EDNRA;ADCY3;AKAP5
GO:0008284_positive_regulation_of_cell_population_proliferation	512	2.93	1.97	0.0136095	0.260075	NAMPT;CXCL10;ATF3;HAS2;CDC25B;MDM2;IL6ST;ID4;HES5;ILK;MEIS3;SSBP3;RELA;CDK4;EDNRB
GO:0033234_negative_regulation_of_protein_sumoylation	12	16.67	12.86	0.0140557	0.260075	PIAS3;RELA
GO:0034497_protein_localization_to_phagophore_assembly_site	12	16.67	12.86	0.0140557	0.260075	WDR45;ATG9A
GO:0034613_cellular_protein_localization	60	6.67	4.61	0.0136519	0.260075	SEPT5;ID4;GAS8;DVL2
GO:0042119_neutrophil_activation	12	16.67	12.86	0.0140557	0.260075	F2RL1;CXCL8
GO:0045648_positive_regulation_of_erythrocyte_differentiation	33	9.09	6.44	0.0139905	0.260075	HSPA1A;STAT5B;ID2
GO:0050729_positive_regulation_of_inflammatory_response	90	5.56	3.8	0.0126914	0.260075	NFKBIA;PDE2A;STAT5B;HYAL2;HSPD1
GO:0051216_cartilage_development	60	6.67	4.61	0.0136519	0.260075	PRRX1;BMP7;HES5;HYAL2
GO:0060396_growth_hormone_receptor_signaling_pathway	12	16.67	12.86	0.0140557	0.260075	PXN;SOCS2
GO:0071498_cellular_response_to_fluid_shear_stress	12	16.67	12.86	0.0140557	0.260075	HAS2;CA2
GO:2000178_negative_regulation_of_neural_precursor_cell_proliferation	12	16.67	12.86	0.0140557	0.260075	ILK;PAX6
GO:0007568_aging	165	4.24	2.87	0.0141617	0.260378	NAMPT;NFKB2;POLG;AURKB;MBD1;RELA;EDNRB
GO:0065003_protein-containing_complex_assembly	128	4.69	3.18	0.0143965	0.263031	FANCA;MDM2;HES5;SPG7;NUP210;SSBP3
GO:0001822_kidney_development	95	5.26	3.59	0.0157324	0.26837	HAS2;CA2;PYGO2;RRM2B;HYAL2
GO:0006511_ubiquitin-dependent_protein_catabolic_process	293	3.41	2.29	0.0158508	0.26837	RNF19A;UHRF1;USP21;MDM2;PLK1;RMND5B;UBQLN4;AURKB;UBQLN1;CUL9
GO:0014912_negative_regulation_of_smooth_muscle_cell_migration	13	15.38	11.69	0.016444	0.26837	ILK;BMPR1A
GO:0016180_snRNA_processing	13	15.38	11.69	0.016444	0.26837	INTS3;INTS9
GO:0021895_cerebral_cortex_neuron_differentiation	13	15.38	11.69	0.016444	0.26837	GDPD5;ID4
GO:0030100_regulation_of_endocytosis	35	8.57	6.04	0.0164099	0.26837	HIP1R;SYT4;BIN1
GO:0030513_positive_regulation_of_BMP_signaling_pathway	35	8.57	6.04	0.0164099	0.26837	HES5;UBE2O;ILK
GO:0035563_positive_regulation_of_chromatin_binding	13	15.38	11.69	0.016444	0.26837	DDX11;PYGO2
GO:0042220_response_to_cocaine	35	8.57	6.04	0.0164099	0.26837	MDM2;MBD1;HSPD1
GO:0045595_regulation_of_cell_differentiation	34	8.82	6.23	0.0151728	0.26837	BIRC2;HES5;RAF1
GO:0045773_positive_regulation_of_axon_extension	34	8.82	6.23	0.0151728	0.26837	ILK;SEMA7A;SRF
GO:0050900_leukocyte_migration	130	4.62	3.13	0.0154352	0.26837	ICAM1;SELE;F2RL1;PPIL2;SLC7A11;PIK3CB
GO:0051973_positive_regulation_of_telomerase_activity	34	8.82	6.23	0.0151728	0.26837	HSP90AA1;PNKP;AURKB
GO:0060294_cilium_movement_involved_in_cell_motility	13	15.38	11.69	0.016444	0.26837	TEKT1;GAS8
GO:0060411_cardiac_septum_morphogenesis	13	15.38	11.69	0.016444	0.26837	MDM2;BMP7
GO:0071526_semaphorin-plexin_signaling_pathway	34	8.82	6.23	0.0151728	0.26837	SEMA4F;SEMA7A;SEMA4A
GO:0097009_energy_homeostasis	35	8.57	6.04	0.0164099	0.26837	PASK;ACACB;NR4A3
GO:1901223_negative_regulation_of_NIK/NF-kappaB_signaling	35	8.57	6.04	0.0164099	0.26837	HDAC7;BMP7;RELA
GO:1901796_regulation_of_signal_transduction_by_p53_class_mediator	131	4.58	3.1	0.0159735	0.26837	MDM2;ATRIP;AURKB;ING5;RAD9A;TOP3A
GO:0021766_hippocampus_development	64	6.25	4.3	0.0169623	0.275281	XRCC1;ID4;NR4A3;SRF
GO:0006730_one-carbon_metabolic_process	36	8.33	5.86	0.0177018	0.284109	CA2;MTHFR;CA14
GO:0030177_positive_regulation_of_Wnt_signaling_pathway	36	8.33	5.86	0.0177018	0.284109	TNFAIP3;RSPO3;DIXDC1
GO:0006476_protein_deacetylation	14	14.29	10.72	0.0189917	0.285241	HDAC7;SIRT2
GO:0032922_circadian_regulation_of_gene_expression	66	6.06	4.16	0.0187895	0.285241	NAMPT;RELB;ID4;ID2
GO:0033120_positive_regulation_of_RNA_splicing	14	14.29	10.72	0.0189917	0.285241	HSPA1A;U2AF2
GO:0042325_regulation_of_phosphorylation	14	14.29	10.72	0.0189917	0.285241	MCM7;SIRT2
GO:0045787_positive_regulation_of_cell_cycle	37	8.11	5.68	0.0190488	0.285241	GDPD5;NR4A3;CDK4
GO:0050930_induction_of_positive_chemotaxis	14	14.29	10.72	0.0189917	0.285241	CXCL8;AZU1
GO:0060021_roof_of_mouth_development	66	6.06	4.16	0.0187895	0.285241	PRRX1;PYGO2;EPHB3;BMPR1A
GO:0061099_negative_regulation_of_protein_tyrosine_kinase_activity	14	14.29	10.72	0.0189917	0.285241	THY1;HYAL2
GO:0070555_response_to_interleukin-1	37	8.11	5.68	0.0190488	0.285241	SELE;MTHFR;RELA
GO:1902430_negative_regulation_of_amyloid-beta_formation	14	14.29	10.72	0.0189917	0.285241	GGA3;BIN1
GO:1902894_negative_regulation_of_pri-miRNA_transcription_by_RNA_polymerase_II	14	14.29	10.72	0.0189917	0.285241	SRF;RELA
GO:1903204_negative_regulation_of_oxidative_stress-induced_neuron_death	14	14.29	10.72	0.0189917	0.285241	SLC7A11;NCOA7
GO:1903364_positive_regulation_of_cellular_protein_catabolic_process	14	14.29	10.72	0.0189917	0.285241	TNFAIP3;HSP90AA1
GO:0006898_receptor-mediated_endocytosis	100	5	3.4	0.0192244	0.286394	HSPH1;HSP90AA1;LMBR1L;SCARB2;HIP1R
GO:0043491_protein_kinase_B_signaling	38	7.89	5.52	0.0204511	0.300052	CCL2;SIRT2;ILK
GO:0050919_negative_chemotaxis	38	7.89	5.52	0.0204511	0.300052	SEMA4F;SEMA7A;SEMA4A
GO:1902042_negative_regulation_of_extrinsic_apoptotic_signaling_pathway_via_death_domain_receptors	38	7.89	5.52	0.0204511	0.300052	TNFAIP3;ICAM1;RAF1
GO:0006388_tRNA_splicing,_via_endonucleolytic_cleavage_and_ligation	15	13.33	9.89	0.0216934	0.300092	CPSF4;TSEN54
GO:0006915_apoptotic_process	542	2.77	1.85	0.0215052	0.300092	DYNLL1;TNFAIP3;NFKBIA;TCIM;BIRC3;MCM2;BIRC2;HIP1R;FEM1B;ZMAT3;FXR1;RAF1;C6orf120;SLK;IFT57
GO:0008053_mitochondrial_fusion	15	13.33	9.89	0.0216934	0.300092	MIGA2;SPG7
GO:0045589_regulation_of_regulatory_T_cell_differentiation	15	13.33	9.89	0.0216934	0.300092	NFATC2;FANCA
GO:0048484_enteric_nervous_system_development	15	13.33	9.89	0.0216934	0.300092	EDNRA;EDNRB
GO:0048545_response_to_steroid_hormone	15	13.33	9.89	0.0216934	0.300092	CA2;MDM2
GO:0048596_embryonic_camera-type_eye_morphogenesis	15	13.33	9.89	0.0216934	0.300092	BMP7;PAX6
GO:0051276_chromosome_organization	15	13.33	9.89	0.0216934	0.300092	NCAPH2;CENPT
GO:0055093_response_to_hyperoxia	15	13.33	9.89	0.0216934	0.300092	POLG;CDK4
GO:0060391_positive_regulation_of_SMAD_protein_signal_transduction	15	13.33	9.89	0.0216934	0.300092	SH2B1;BMPR1A
GO:1903827_regulation_of_cellular_protein_localization	15	13.33	9.89	0.0216934	0.300092	HSP90AA1;TRIM46
GO:1904996_positive_regulation_of_leukocyte_adhesion_to_vascular_endothelial_cell	15	13.33	9.89	0.0216934	0.300092	ICAM1;RELA
GO:0007190_activation_of_adenylate_cyclase_activity	39	7.69	5.37	0.0219086	0.301632	EDNRA;RAF1;ADCY3
GO:0070098_chemokine-mediated_signaling_pathway	70	5.71	3.91	0.0227979	0.310929	CXCL10;CCL2;CXCL3;CXCL8
GO:0070301_cellular_response_to_hydrogen_peroxide	70	5.71	3.91	0.0227979	0.310929	TNFAIP3;MDM2;PPP5C;RELA
GO:0007051_spindle_organization	16	12.5	9.19	0.0245437	0.311352	CEP72;AURKB
GO:0007076_mitotic_chromosome_condensation	16	12.5	9.19	0.0245437	0.311352	NCAPH2;PHF13
GO:0032270_positive_regulation_of_cellular_protein_metabolic_process	16	12.5	9.19	0.0245437	0.311352	NFKBIA;UHRF1
GO:0032456_endocytic_recycling	40	7.5	5.22	0.0234214	0.311352	GGA3;EPS15;SNX4
GO:0033280_response_to_vitamin_D	16	12.5	9.19	0.0245437	0.311352	CXCL10;BMP7
GO:0034116_positive_regulation_of_heterotypic_cell-cell_adhesion	16	12.5	9.19	0.0245437	0.311352	THY1;BMP7
GO:0035729_cellular_response_to_hepatocyte_growth_factor_stimulus	16	12.5	9.19	0.0245437	0.311352	SIRT2;RELA
GO:0035735_intraciliary_transport_involved_in_cilium_assembly	40	7.5	5.22	0.0234214	0.311352	DYNLL2;DYNLL1;IFT57
GO:0042310_vasoconstriction	16	12.5	9.19	0.0245437	0.311352	EDNRA;EDNRB
GO:0042326_negative_regulation_of_phosphorylation	16	12.5	9.19	0.0245437	0.311352	DYNLL1;BMP7
GO:0045956_positive_regulation_of_calcium_ion-dependent_exocytosis	16	12.5	9.19	0.0245437	0.311352	STX1A;SYT4
GO:0051770_positive_regulation_of_nitric-oxide_synthase_biosynthetic_process	16	12.5	9.19	0.0245437	0.311352	NAMPT;CCL2
GO:0060218_hematopoietic_stem_cell_differentiation	16	12.5	9.19	0.0245437	0.311352	LMBR1L;SRF
GO:0060749_mammary_gland_alveolus_development	16	12.5	9.19	0.0245437	0.311352	ID2;SOCS2
GO:0090307_mitotic_spindle_assembly	40	7.5	5.22	0.0234214	0.311352	KIFC1;AAAS;WRAP73
GO:1902895_positive_regulation_of_pri-miRNA_transcription_by_RNA_polymerase_II	40	7.5	5.22	0.0234214	0.311352	SRF;BMPR1A;RELA
GO:0002088_lens_development_in_camera-type_eye	41	7.32	5.08	0.0249895	0.314262	PYGO2;PAX6;CDK4
GO:0032508_DNA_duplex_unwinding	72	5.56	3.79	0.0249824	0.314262	MCM5;MCM3;DDX11;GINS2
GO:0001654_eye_development	42	7.14	4.95	0.0266128	0.330386	MEIS3;PAX6;SMG9
GO:0009725_response_to_hormone	42	7.14	4.95	0.0266128	0.330386	PIAS3;SRF;MMS19
GO:0043484_regulation_of_RNA_splicing	42	7.14	4.95	0.0266128	0.330386	FUS;MBNL2;HNRNPL
GO:0003351_epithelial_cilium_movement_involved_in_extracellular_fluid_movement	17	11.76	8.57	0.0275376	0.330565	GAS8;STK36
GO:0006491_N-glycan_processing	17	11.76	8.57	0.0275376	0.330565	MAN2A2;MAN1B1
GO:0008637_apoptotic_mitochondrial_changes	17	11.76	8.57	0.0275376	0.330565	ATP2A1;HSPD1
GO:0032012_regulation_of_ARF_protein_signal_transduction	17	11.76	8.57	0.0275376	0.330565	PSD2;CYTH2
GO:0060324_face_development	17	11.76	8.57	0.0275376	0.330565	RAF1;SRF
GO:1901673_regulation_of_mitotic_spindle_assembly	17	11.76	8.57	0.0275376	0.330565	HSPA1A;PLK1
GO:1904355_positive_regulation_of_telomere_capping	17	11.76	8.57	0.0275376	0.330565	PNKP;AURKB
GO:2000045_regulation_of_G1/S_transition_of_mitotic_cell_cycle	17	11.76	8.57	0.0275376	0.330565	E2F1;ID2
GO:0015701_bicarbonate_transport	43	6.98	4.83	0.0282912	0.33409	CA2;SLC26A6;CA14
GO:0021762_substantia_nigra_development	43	6.98	4.83	0.0282912	0.33409	DYNLL1;SIRT2;PLP1
GO:0034080_CENP-A_containing_nucleosome_assembly	43	6.98	4.83	0.0282912	0.33409	CENPO;CENPT;CENPM
GO:0070527_platelet_aggregation	43	6.98	4.83	0.0282912	0.33409	SLC7A11;ILK;PIK3CB
GO:0034976_response_to_endoplasmic_reticulum_stress	75	5.33	3.63	0.0284882	0.335054	CXCL8;UBQLN1;PLA2G6;ATP2A1
GO:0045727_positive_regulation_of_translation	76	5.26	3.58	0.0297185	0.348114	PASK;FXR1;HNRNPL;CDK4
GO:0048538_thymus_development	44	6.82	4.71	0.0300246	0.350287	EPHB3;RAF1;SRF
GO:0003203_endocardial_cushion_morphogenesis	18	11.11	8.04	0.0306698	0.352157	MDM2;BMPR1A
GO:0022011_myelination_in_peripheral_nervous_system	18	11.11	8.04	0.0306698	0.352157	SIRT2;ILK
GO:0031290_retinal_ganglion_cell_axon_guidance	18	11.11	8.04	0.0306698	0.352157	SEMA4F;EPHB3
GO:0034329_cell_junction_assembly	18	11.11	8.04	0.0306698	0.352157	ILK;VMP1
GO:0030593_neutrophil_chemotaxis	77	5.19	3.53	0.0309797	0.354316	CXCL10;CCL2;CXCL3;CXCL8
GO:0022008_neurogenesis	45	6.67	4.6	0.0318128	0.361001	WDR62;LEMD2;BTBD1
GO:1904646_cellular_response_to_amyloid-beta	45	6.67	4.6	0.0318128	0.361001	VCAM1;NAMPT;ICAM1
GO:0001843_neural_tube_closure	78	5.13	3.49	0.0322721	0.364788	MTHFR;BRD2;DVL2;IFT57
GO:0010288_response_to_lead_ion	19	10.53	7.57	0.0339355	0.366478	PPP5C;CDK4
GO:0010824_regulation_of_centrosome_duplication	19	10.53	7.57	0.0339355	0.366478	XRCC3;CHORDC1
GO:0021591_ventricular_system_development	19	10.53	7.57	0.0339355	0.366478	SLC7A11;CCDC134
GO:0030220_platelet_formation	19	10.53	7.57	0.0339355	0.366478	NBEAL2;SRF
GO:0030705_cytoskeleton-dependent_intracellular_transport	19	10.53	7.57	0.0339355	0.366478	TUBB;TUBA1B
GO:0031175_neuron_projection_development	115	4.35	2.93	0.0326201	0.366478	USP21;GDPD5;CNTN1;SRF;PLP1
GO:0042267_natural_killer_cell_mediated_cytotoxicity	19	10.53	7.57	0.0339355	0.366478	TUBB;TUBB4B
GO:0043254_regulation_of_protein-containing_complex_assembly	19	10.53	7.57	0.0339355	0.366478	HSP90AA1;HSPA8
GO:0043551_regulation_of_phosphatidylinositol_3-kinase_activity	19	10.53	7.57	0.0339355	0.366478	SOCS2;WDR91
GO:0048663_neuron_fate_commitment	19	10.53	7.57	0.0339355	0.366478	ID2;PAX6
GO:0050901_leukocyte_tethering_or_rolling	19	10.53	7.57	0.0339355	0.366478	VCAM1;SELE
GO:0071354_cellular_response_to_interleukin-6	19	10.53	7.57	0.0339355	0.366478	ICAM1;RELA
GO:0042981_regulation_of_apoptotic_process	199	3.52	2.36	0.0348159	0.374593	CXCL10;BIRC3;BIRC2;RAF1;DIP2A;SLK;IFT57
GO:0007157_heterophilic_cell-cell_adhesion_via_plasma_membrane_cell_adhesion_molecules	47	6.38	4.39	0.0355526	0.381108	VCAM1;ICAM1;SELE
GO:0001556_oocyte_maturation	20	10	7.14	0.0373299	0.381843	CDC25B;REC8
GO:0001659_temperature_homeostasis	20	10	7.14	0.0373299	0.381843	ARRDC3;ACADVL
GO:0002756_MyD88-independent_toll-like_receptor_signaling_pathway	20	10	7.14	0.0373299	0.381843	BIRC3;BIRC2
GO:0006397_mRNA_processing	159	3.77	2.53	0.0367048	0.381843	SF3B4;SUGP2;CLASRP;MBNL2;TSEN54;U2AF2
GO:0007031_peroxisome_organization	20	10	7.14	0.0373299	0.381843	ABCD4;PEX6
GO:0007194_negative_regulation_of_adenylate_cyclase_activity	20	10	7.14	0.0373299	0.381843	AKAP5;EDNRB
GO:0019934_cGMP-mediated_signaling	20	10	7.14	0.0373299	0.381843	PDE2A;EDNRB
GO:0031641_regulation_of_myelination	20	10	7.14	0.0373299	0.381843	SIRT2;HES5
GO:0031647_regulation_of_protein_stability	81	4.94	3.35	0.0363364	0.381843	HSPA8;LSS;GGA3;TMEM25
GO:0046827_positive_regulation_of_protein_export_from_nucleus	20	10	7.14	0.0373299	0.381843	MDM2;GTSE1
GO:0060546_negative_regulation_of_necroptotic_process	20	10	7.14	0.0373299	0.381843	BIRC3;BIRC2
GO:0070932_histone_H3_deacetylation	20	10	7.14	0.0373299	0.381843	HDAC7;SIRT2
GO:0097755_positive_regulation_of_blood_vessel_diameter	20	10	7.14	0.0373299	0.381843	F2RL1;PLA2G6
GO:0030199_collagen_fibril_organization	48	6.25	4.29	0.0375036	0.382274	P4HA1;DDR2;COL11A1
GO:0000724_double-strand_break_repair_via_homologous_recombination	82	4.88	3.31	0.0377538	0.383478	XRCC3;TONSL;XRCC1;REC8
GO:0009636_response_to_toxic_substance	83	4.82	3.26	0.0392025	0.396806	MDM2;SLC7A11;SRF;CDK4
GO:0003151_outflow_tract_morphogenesis	49	6.12	4.2	0.0395084	0.397134	DVL2;ILK;BMPR1A
GO:0048146_positive_regulation_of_fibroblast_proliferation	49	6.12	4.2	0.0395084	0.397134	E2F1;DDR2;CDK4
GO:0010613_positive_regulation_of_cardiac_muscle_hypertrophy	21	9.52	6.77	0.0408482	0.402251	IL6ST;NR4A3
GO:0014032_neural_crest_cell_development	21	9.52	6.77	0.0408482	0.402251	EDNRA;BMPR1A
GO:0030878_thyroid_gland_development	21	9.52	6.77	0.0408482	0.402251	RAF1;SRF
GO:0033209_tumor_necrosis_factor-mediated_signaling_pathway	122	4.1	2.76	0.04046	0.402251	NFKBIA;BIRC3;BIRC2;ILK;RELA
GO:0045088_regulation_of_innate_immune_response	21	9.52	6.77	0.0408482	0.402251	BIRC3;BIRC2
GO:0050807_regulation_of_synapse_organization	21	9.52	6.77	0.0408482	0.402251	TUBB;IGSF9
GO:0016567_protein_ubiquitination	490	2.65	1.77	0.0411179	0.403539	UHRF1;BIRC3;RNF220;MDM2;PLK1;CDCA3;ARRDC4;FEM1B;PJA2;SOCS2;CUL9;BTBD1;DTX3
GO:0031648_protein_destabilization	50	6	4.11	0.0415665	0.405203	MDM2;PLK1;GGA3
GO:1904707_positive_regulation_of_vascular_associated_smooth_muscle_cell_proliferation	50	6	4.11	0.0415665	0.405203	MDM2;NR4A3;BMPR1A
GO:0045666_positive_regulation_of_neuron_differentiation	85	4.71	3.18	0.0421941	0.409946	GDPD5;BEND6;SOCS2;CYB5D2
GO:0006935_chemotaxis	124	4.03	2.71	0.0428922	0.415339	CXCL10;CCL2;CXCL8;PLA2G6;PIK3CB
GO:0001676_long-chain_fatty_acid_metabolic_process	22	9.09	6.43	0.0444858	0.419582	ACSBG1;ACAD9
GO:0006261_DNA-dependent_DNA_replication	22	9.09	6.43	0.0444858	0.419582	POLG;PNKP
GO:0035584_calcium-mediated_signaling_using_intracellular_calcium_source	22	9.09	6.43	0.0444858	0.419582	VCAM1;AZU1
GO:0042542_response_to_hydrogen_peroxide	51	5.88	4.02	0.0436775	0.419582	TXNIP;NR4A3;HSPD1
GO:0045599_negative_regulation_of_fat_cell_differentiation	51	5.88	4.02	0.0436775	0.419582	E2F1;ID4;SIRT2
GO:0048025_negative_regulation_of_mRNA_splicing,_via_spliceosome	22	9.09	6.43	0.0444858	0.419582	HNRNPL;U2AF2
GO:0050768_negative_regulation_of_neurogenesis	22	9.09	6.43	0.0444858	0.419582	BMPR1A;PAX6
GO:0071157_negative_regulation_of_cell_cycle_arrest	22	9.09	6.43	0.0444858	0.419582	MDM2;CDK4
GO:0030036_actin_cytoskeleton_organization	168	3.57	2.39	0.0458982	0.431503	CORO2B;INF2;EHBP1L1;FGD3;SRF;CYTH2
GO:0002053_positive_regulation_of_mesenchymal_cell_proliferation	23	8.7	6.12	0.0482383	0.439287	PRRX1;BMPR1A
GO:0006297_nucleotide-excision_repair,_DNA_gap_filling	23	8.7	6.12	0.0482383	0.439287	XRCC1;POLE
GO:0006851_mitochondrial_calcium_ion_transmembrane_transport	23	8.7	6.12	0.0482383	0.439287	PMPCA;SPG7
GO:0007088_regulation_of_mitotic_nuclear_division	23	8.7	6.12	0.0482383	0.439287	PKMYT1;CUL9
GO:0009314_response_to_radiation	23	8.7	6.12	0.0482383	0.439287	FANCG;PNKP
GO:0016125_sterol_metabolic_process	23	8.7	6.12	0.0482383	0.439287	CYP39A1;CYP46A1
GO:0019233_sensory_perception_of_pain	53	5.66	3.86	0.048057	0.439287	CCL2;RETREG1;EDNRB
GO:0032703_negative_regulation_of_interleukin-2_production	23	8.7	6.12	0.0482383	0.439287	TNFAIP3;HDAC7
GO:0043401_steroid_hormone_mediated_signaling_pathway	23	8.7	6.12	0.0482383	0.439287	BMP7;NR4A3
GO:0048026_positive_regulation_of_mRNA_splicing,_via_spliceosome	23	8.7	6.12	0.0482383	0.439287	HSPA8;SF3B4
GO:0007050_cell_cycle_arrest	129	3.88	2.6	0.0493502	0.448007	CXCL8;WDR6;MAPK12;RASSF1;ILK
GO:0072332_intrinsic_apoptotic_signaling_pathway_by_p53_class_mediator	24	8.33	5.84	0.0521014	0.471509	E2F1;E2F2
GO:0034446_substrate_adhesion-dependent_cell_spreading	56	5.36	3.64	0.0550124	0.496308	PXN;EPHB3;ILK
GO:0007160_cell-matrix_adhesion	93	4.3	2.9	0.055412	0.498365	VCAM1;ITGA7;ILK;SRF
GO:0007569_cell_aging	25	8	5.59	0.0560706	0.502732	ICAM1;ILK
GO:0006887_exocytosis	94	4.26	2.86	0.0572042	0.510213	EXOC3;EXOC7;ARHGAP44;STX1A
GO:0042475_odontogenesis_of_dentin-containing_tooth	57	5.26	3.58	0.0574319	0.510213	CA2;BMP7;BMPR1A
GO:0046854_phosphatidylinositol_phosphorylation	57	5.26	3.58	0.0574319	0.510213	SOCS2;TTC7A;PIK3CB
GO:0006259_DNA_metabolic_process	26	7.69	5.36	0.0601419	0.518434	POLG;MMS19
GO:0009880_embryonic_pattern_specification	26	7.69	5.36	0.0601419	0.518434	BMP7;MEIS3
GO:0030833_regulation_of_actin_filament_polymerization	26	7.69	5.36	0.0601419	0.518434	GBA2;PLEKHG2
GO:0034620_cellular_response_to_unfolded_protein	26	7.69	5.36	0.0601419	0.518434	HSPA1A;HSPA8
GO:0042759_long-chain_fatty_acid_biosynthetic_process	26	7.69	5.36	0.0601419	0.518434	ACSBG1;PLP1
GO:0045664_regulation_of_neuron_differentiation	26	7.69	5.36	0.0601419	0.518434	ID2;BIN1
GO:0051149_positive_regulation_of_muscle_cell_differentiation	26	7.69	5.36	0.0601419	0.518434	MDM2;MAPK12
GO:1900740_positive_regulation_of_protein_insertion_into_mitochondrial_membrane_involved_in_apoptotic_signaling_pathway	26	7.69	5.36	0.0601419	0.518434	E2F1;TFDP1
GO:1904754_positive_regulation_of_vascular_associated_smooth_muscle_cell_migration	26	7.69	5.36	0.0601419	0.518434	MDM2;NR4A3
GO:2000463_positive_regulation_of_excitatory_postsynaptic_potential	26	7.69	5.36	0.0601419	0.518434	CACNB3;STX1A
GO:0001816_cytokine_production	27	7.41	5.14	0.0643112	0.53075	NFATC2;NFATC2IP
GO:0010332_response_to_gamma_radiation	27	7.41	5.14	0.0643112	0.53075	CXCL10;POLG
GO:0010971_positive_regulation_of_G2/M_transition_of_mitotic_cell_cycle	27	7.41	5.14	0.0643112	0.53075	CDC25B;CDK4
GO:0014003_oligodendrocyte_development	27	7.41	5.14	0.0643112	0.53075	ID2;HES5
GO:0019886_antigen_processing_and_presentation_of_exogenous_peptide_antigen_via_MHC_class_II	97	4.12	2.77	0.0627649	0.53075	DYNLL2;DYNLL1;KIF22;SEC24D
GO:0021983_pituitary_gland_development	27	7.41	5.14	0.0643112	0.53075	BMPR1A;PAX6
GO:0034394_protein_localization_to_cell_surface	27	7.41	5.14	0.0643112	0.53075	GGA1;GGA3
GO:0035329_hippo_signaling	27	7.41	5.14	0.0643112	0.53075	PJA2;DVL2
GO:0040014_regulation_of_multicellular_organism_growth	27	7.41	5.14	0.0643112	0.53075	STAT5B;CDK4
GO:0048041_focal_adhesion_assembly	27	7.41	5.14	0.0643112	0.53075	THY1;CORO2B
GO:0048255_mRNA_stabilization	27	7.41	5.14	0.0643112	0.53075	E2F1;FUS
GO:0048675_axon_extension	27	7.41	5.14	0.0643112	0.53075	HSP90AA1;SEMA7A
GO:0051289_protein_homotetramerization	59	5.08	3.45	0.0624193	0.53075	CRTC2;ACACB;AQP4
GO:0071363_cellular_response_to_growth_factor_stimulus	59	5.08	3.45	0.0624193	0.53075	MDM2;STAT5B;BMPR1A
GO:1900182_positive_regulation_of_protein_localization_to_nucleus	27	7.41	5.14	0.0643112	0.53075	PLK1;GTSE1
GO:0008283_cell_population_proliferation	140	3.57	2.39	0.0654661	0.537513	TACC3;MCM7;EDNRA;AURKB;TACC2
GO:0050821_protein_stabilization	184	3.26	2.18	0.0655007	0.537513	HSPA1A;HSP90AA1;GTSE1;HIP1R;PEX6;HSPD1
GO:0007420_brain_development	230	3.04	2.03	0.0657715	0.538214	PYGO2;GAS8;HES5;MEIS3;STK36;SYT4;SMG9
GO:0001934_positive_regulation_of_protein_phosphorylation	185	3.24	2.16	0.066866	0.544106	HSP90AA1;FXR1;PLA2G6;DVL2;ILK;EDNRB
GO:0043123_positive_regulation_of_I-kappaB_kinase/NF-kappaB_signaling	185	3.24	2.16	0.066866	0.544106	F2RL1;BIRC3;PPP5C;IFIT5;BIRC2;RELA
GO:0043524_negative_regulation_of_neuron_apoptotic_process	141	3.55	2.37	0.0670609	0.544168	CCL2;RETREG1;NR4A3;ILK;HSPD1
GO:0042102_positive_regulation_of_T_cell_proliferation	61	4.92	3.33	0.0676006	0.547019	VCAM1;IL6ST;CD276
GO:0006402_mRNA_catabolic_process	28	7.14	4.94	0.0685746	0.547278	HSPA1A;DXO
GO:0035023_regulation_of_Rho_protein_signal_transduction	28	7.14	4.94	0.0685746	0.547278	ARHGEF25;RAF1
GO:0035987_endodermal_cell_differentiation	28	7.14	4.94	0.0685746	0.547278	ITGA7;COL11A1
GO:0051090_regulation_of_DNA-binding_transcription_factor_activity	28	7.14	4.94	0.0685746	0.547278	FANCA;STK36
GO:0051453_regulation_of_intracellular_pH	28	7.14	4.94	0.0685746	0.547278	CA2;SLC26A6
GO:0000083_regulation_of_transcription_involved_in_G1/S_transition_of_mitotic_cell_cycle	29	6.9	4.76	0.0729281	0.560466	E2F1;TFDP1
GO:0001656_metanephros_development	29	6.9	4.76	0.0729281	0.560466	BMP7;ID2
GO:0001774_microglial_cell_activation	29	6.9	4.76	0.0729281	0.560466	NAMPT;AZU1
GO:0006406_mRNA_export_from_nucleus	101	3.96	2.66	0.0706043	0.560466	CPSF4;AAAS;NUP210;U2AF2
GO:0017156_calcium-ion_regulated_exocytosis	29	6.9	4.76	0.0729281	0.560466	STX1A;SYT4
GO:0031297_replication_fork_processing	29	6.9	4.76	0.0729281	0.560466	DDX11;TONSL
GO:0032870_cellular_response_to_hormone_stimulus	29	6.9	4.76	0.0729281	0.560466	STAT5B;SOCS2
GO:0034113_heterotypic_cell-cell_adhesion	29	6.9	4.76	0.0729281	0.560466	VCAM1;ITGA7
GO:0043001_Golgi_to_plasma_membrane_protein_transport	29	6.9	4.76	0.0729281	0.560466	GGA1;GGA3
GO:0043312_neutrophil_degranulation	482	2.49	1.65	0.0707512	0.560466	DYNLL1;HSPA1A;HSP90AA1;TUBB;HSPA8;NBEAL2;DOK3;AZU1;C6orf120;TUBB4B;DNAJC3;QSOX1
GO:0051281_positive_regulation_of_release_of_sequestered_calcium_ion_into_cytosol	29	6.9	4.76	0.0729281	0.560466	CXCL10;THY1
GO:0051603_proteolysis_involved_in_cellular_protein_catabolic_process	29	6.9	4.76	0.0729281	0.560466	MDM2;DNAJC3
GO:0060612_adipose_tissue_development	29	6.9	4.76	0.0729281	0.560466	ID2;CDK4
GO:0071897_DNA_biosynthetic_process	29	6.9	4.76	0.0729281	0.560466	POLG;POLM
GO:0007507_heart_development	190	3.16	2.1	0.0739404	0.566746	EDNRA;RAF1;MBD1;DVL2;SRF;SMG9
GO:0006979_response_to_oxidative_stress	103	3.88	2.6	0.0747035	0.571088	PNKP;SCARA3;NCOA7;RRM2B
GO:0007165_signal_transduction	1027	2.14	1.42	0.0749537	0.571497	NAMPT;CXCL10;CCL2;MICAL1;CXCL8;PDE2A;PXN;ARHGAP44;LMBR1L;CALCOCO1;MAPK12;GKAP1;DDR2;EDNRA;RAF1;ADCY3;AKAP5;MAPK6;ARHGAP42;PIK3CB;CDK4;GPR173
GO:0007224_smoothened_signaling_pathway	64	4.69	3.17	0.0757255	0.574367	HES5;IFT57;PAX6
GO:0048010_vascular_endothelial_growth_factor_receptor_signaling_pathway	64	4.69	3.17	0.0757255	0.574367	HSP90AA1;PXN;PIK3CB
GO:0000132_establishment_of_mitotic_spindle_orientation	30	6.67	4.59	0.0773681	0.579263	PLK1;PAX6
GO:0007131_reciprocal_meiotic_recombination	30	6.67	4.59	0.0773681	0.579263	RAD54L;REC8
GO:0035666_TRIF-dependent_toll-like_receptor_signaling_pathway	30	6.67	4.59	0.0773681	0.579263	BIRC3;BIRC2
GO:0038111_interleukin-7-mediated_signaling_pathway	30	6.67	4.59	0.0773681	0.579263	STAT5B;SOCS2
GO:0043392_negative_regulation_of_DNA_binding	30	6.67	4.59	0.0773681	0.579263	NFKBIA;E2F1
GO:0071333_cellular_response_to_glucose_stimulus	65	4.62	3.11	0.0785254	0.586417	ICAM1;POLG;SRF
GO:0008217_regulation_of_blood_pressure	66	4.55	3.06	0.0813699	0.603789	ACTA2;EDNRA;EDNRB
GO:0033077_T_cell_differentiation_in_thymus	31	6.45	4.43	0.0818908	0.603789	STAT5B;NCAPH2
GO:0034612_response_to_tumor_necrosis_factor	31	6.45	4.43	0.0818908	0.603789	SELE;GGT7
GO:0048568_embryonic_organ_development	31	6.45	4.43	0.0818908	0.603789	POLE;BMPR1A
GO:1901224_positive_regulation_of_NIK/NF-kappaB_signaling	66	4.55	3.06	0.0813699	0.603789	TCIM;ILK;RELA
GO:0030335_positive_regulation_of_cell_migration	243	2.88	1.92	0.0825144	0.606847	HAS2;F2RL1;SEMA4F;GTSE1;ILK;SEMA7A;SEMA4A
GO:0008360_regulation_of_cell_shape	151	3.31	2.21	0.0841832	0.617556	CCL2;ICAM1;ITGA7;FGD3;SEMA4A
GO:0000398_mRNA_splicing,_via_spliceosome	245	2.86	1.9	0.0852894	0.621934	HSPA8;FUS;SF3B4;SRRT;CPSF4;HNRNPL;U2AF2
GO:0001569_branching_involved_in_blood_vessel_morphogenesis	32	6.25	4.28	0.0864926	0.621934	EDNRA;SRF
GO:0001974_blood_vessel_remodeling	32	6.25	4.28	0.0864926	0.621934	MDM2;RSPO3
GO:0006335_DNA_replication-dependent_nucleosome_assembly	32	6.25	4.28	0.0864926	0.621934	CHAF1B;CHAF1A
GO:0048008_platelet-derived_growth_factor_receptor_signaling_pathway	32	6.25	4.28	0.0864926	0.621934	TXNIP;NR4A3
GO:0048662_negative_regulation_of_smooth_muscle_cell_proliferation	32	6.25	4.28	0.0864926	0.621934	TNFAIP3;ILK
GO:0070507_regulation_of_microtubule_cytoskeleton_organization	32	6.25	4.28	0.0864926	0.621934	RASSF1;DIXDC1
GO:0071479_cellular_response_to_ionizing_radiation	32	6.25	4.28	0.0864926	0.621934	NAMPT;RAD9A
GO:0030855_epithelial_cell_differentiation	68	4.41	2.97	0.0871904	0.623862	BMP7;TAGLN;ACADVL
GO:0060070_canonical_Wnt_signaling_pathway	68	4.41	2.97	0.0871904	0.623862	PYGO2;DVL2;DIXDC1
GO:0006325_chromatin_organization	153	3.27	2.18	0.08786	0.627109	CBX2;PHF19;CDAN1;RELA;PHF13
GO:0042760_very_long-chain_fatty_acid_catabolic_process	6	16.67	12.83	0.0887832	0.632145	ABCD4
GO:0003281_ventricular_septum_development	33	6.06	4.15	0.0911702	0.635131	MDM2;PDE2A
GO:0006334_nucleosome_assembly	110	3.64	2.43	0.0899669	0.635131	MCM2;CHAF1B;CHAF1A;BRD2
GO:0043928_exonucleolytic_catabolism_of_deadenylated_mRNA	33	6.06	4.15	0.0911702	0.635131	DDX6;SKIV2L
GO:0045444_fat_cell_differentiation	69	4.35	2.92	0.0901649	0.635131	ID4;NR4A3;TMEM120B
GO:0045736_negative_regulation_of_cyclin-dependent_protein_serine/threonine_kinase_activity	33	6.06	4.15	0.0911702	0.635131	TNFAIP3;PLK1
GO:0046034_ATP_metabolic_process	33	6.06	4.15	0.0911702	0.635131	HSPA1A;HSPA8
GO:0051865_protein_autoubiquitination	69	4.35	2.92	0.0901649	0.635131	UHRF1;RNF220;MDM2
GO:0061844_antimicrobial_humoral_immune_response_mediated_by_antimicrobial_peptide	69	4.35	2.92	0.0901649	0.635131	CXCL10;CXCL3;CXCL8
GO:0071773_cellular_response_to_BMP_stimulus	33	6.06	4.15	0.0911702	0.635131	BMP7;BMPR1A
GO:0021987_cerebral_cortex_development	70	4.29	2.88	0.0931814	0.644505	WDR62;TACC3;TACC2
GO:0030433_ubiquitin-dependent_ERAD_pathway	70	4.29	2.88	0.0931814	0.644505	UBQLN1;MAN1B1;UBE2J1
GO:0042795_snRNA_transcription_by_RNA_polymerase_II	70	4.29	2.88	0.0931814	0.644505	SRRT;INTS3;INTS9
GO:0003091_renal_water_homeostasis	34	5.88	4.02	0.09592	0.645018	ADCY3;AQP4
GO:0006099_tricarboxylic_acid_cycle	34	5.88	4.02	0.09592	0.645018	OGDHL;IDH3G
GO:0006409_tRNA_export_from_nucleus	34	5.88	4.02	0.09592	0.645018	AAAS;NUP210
GO:0006513_protein_monoubiquitination	34	5.88	4.02	0.09592	0.645018	KLHL22;UBE2O
GO:0007202_activation_of_phospholipase_C_activity	34	5.88	4.02	0.09592	0.645018	SELE;EDNRA
GO:0007616_long-term_memory	34	5.88	4.02	0.09592	0.645018	PJA2;SRF
GO:0031663_lipopolysaccharide-mediated_signaling_pathway	34	5.88	4.02	0.09592	0.645018	CCL2;NFKBIA
GO:0032212_positive_regulation_of_telomere_maintenance_via_telomerase	34	5.88	4.02	0.09592	0.645018	PNKP;AURKB
GO:0034504_protein_localization_to_nucleus	34	5.88	4.02	0.09592	0.645018	MDM2;BMP7
GO:0045540_regulation_of_cholesterol_biosynthetic_process	34	5.88	4.02	0.09592	0.645018	ACACB;LSS
GO:0051017_actin_filament_bundle_assembly	34	5.88	4.02	0.09592	0.645018	MICAL1;AIF1L
GO:2000352_negative_regulation_of_endothelial_cell_apoptotic_process	34	5.88	4.02	0.09592	0.645018	TNFAIP3;ICAM1
GO:0043087_regulation_of_GTPase_activity	71	4.23	2.84	0.096239	0.645668	ARHGAP44;EPHB3;FGD3
GO:0030198_extracellular_matrix_organization	254	2.76	1.83	0.0984274	0.658829	VCAM1;ICAM1;ITGA7;NFKB2;POMT1;DDR2;COL11A1
GO:0001933_negative_regulation_of_protein_phosphorylation	72	4.17	2.8	0.0993371	0.660353	MICAL1;PPP5C;PAX6
GO:0045732_positive_regulation_of_protein_catabolic_process	72	4.17	2.8	0.0993371	0.660353	TNFAIP3;GGA1;GGA3
GO:0051091_positive_regulation_of_DNA-binding_transcription_factor_activity	114	3.51	2.34	0.0993078	0.660353	DDR2;DVL2;SRF;TFDP1
GO:0042177_negative_regulation_of_protein_catabolic_process	35	5.71	3.89	0.100739	0.668142	SIRT2;RELA
GO:0008380_RNA_splicing	160	3.12	2.08	0.101373	0.670819	FUS;SF3B4;SUGP2;CLASRP;MBNL2
GO:0007059_chromosome_segregation	73	4.11	2.76	0.102475	0.672574	CENPT;MMS19;PHF13
GO:0017185_peptidyl-lysine_hydroxylation	7	14.29	10.69	0.102796	0.672574	P3H3
GO:0030213_hyaluronan_biosynthetic_process	7	14.29	10.69	0.102796	0.672574	HAS2
GO:0031398_positive_regulation_of_protein_ubiquitination	73	4.11	2.76	0.102475	0.672574	BIRC3;BIRC2;UBQLN1
GO:0044806_G-quadruplex_DNA_unwinding	7	14.29	10.69	0.102796	0.672574	DDX11
GO:0007623_circadian_rhythm	74	4.05	2.72	0.105652	0.686619	NAMPT;HNRNPL;CDK4
GO:0018105_peptidyl-serine_phosphorylation	162	3.09	2.05	0.105415	0.686619	STK32A;PLK1;MAPK12;VRK3;ILK
GO:0030217_T_cell_differentiation	36	5.56	3.78	0.105623	0.686619	LMBR1L;PATZ1
GO:0000422_autophagy_of_mitochondrion	37	5.41	3.67	0.11057	0.707505	WDR45;ATG9A
GO:0001890_placenta_development	37	5.41	3.67	0.11057	0.707505	BIRC2;CCDC134
GO:0006906_vesicle_fusion	37	5.41	3.67	0.11057	0.707505	STX1A;SYT4
GO:0007080_mitotic_metaphase_plate_congression	37	5.41	3.67	0.11057	0.707505	KIFC1;KIF22
GO:0014065_phosphatidylinositol_3-kinase_signaling	37	5.41	3.67	0.11057	0.707505	SIRT2;PIK3CB
GO:0048469_cell_maturation	37	5.41	3.67	0.11057	0.707505	ID2;HES5
GO:0051225_spindle_assembly	37	5.41	3.67	0.11057	0.707505	TUBB;HAUS5
GO:0000381_regulation_of_alternative_mRNA_splicing,_via_spliceosome	76	3.95	2.64	0.11212	0.712708	FXR1;MBNL2;HNRNPL
GO:0006469_negative_regulation_of_protein_kinase_activity	76	3.95	2.64	0.11212	0.712708	THY1;ILK;DNAJC3
GO:0043547_positive_regulation_of_GTPase_activity	313	2.56	1.69	0.111636	0.712708	CCL2;ICAM1;F2RL1;THY1;ARHGAP44;ARHGEF1;DVL2;SGSM2
GO:0050852_T_cell_receptor_signaling_pathway	166	3.01	2	0.113731	0.721375	CACNB3;THY1;CD276;RELA;PIK3CB
GO:0001503_ossification	77	3.9	2.61	0.115409	0.72528	DDR2;BMP7;COL11A1
GO:0006517_protein_deglycosylation	8	12.5	9.16	0.116594	0.72528	MAN2A2
GO:0008104_protein_localization	77	3.9	2.61	0.115409	0.72528	CDAN1;GGA1;NBEAL2
GO:0032049_cardiolipin_biosynthetic_process	8	12.5	9.16	0.116594	0.72528	PLA2G6
GO:0035965_cardiolipin_acyl-chain_remodeling	8	12.5	9.16	0.116594	0.72528	PLA2G6
GO:0043967_histone_H4_acetylation	38	5.26	3.57	0.115577	0.72528	NAA40;ING5
GO:0044154_histone_H3-K14_acetylation	8	12.5	9.16	0.116594	0.72528	ING5
GO:0051256_mitotic_spindle_midzone_assembly	8	12.5	9.16	0.116594	0.72528	AURKB
GO:1990542_mitochondrial_transmembrane_transport	8	12.5	9.16	0.116594	0.72528	SFXN5
GO:0006606_protein_import_into_nucleus	78	3.85	2.57	0.118735	0.737017	NFKBIA;IPO13;TXNIP
GO:0007169_transmembrane_receptor_protein_tyrosine_kinase_signaling_pathway	122	3.28	2.18	0.119263	0.738721	SH2B1;EPHB3;DDR2;PIK3CB
GO:0009566_fertilization	39	5.13	3.47	0.12064	0.739367	AAAS;REC8
GO:0030030_cell_projection_organization	39	5.13	3.47	0.12064	0.739367	CDK10;WRAP73
GO:0030326_embryonic_limb_morphogenesis	39	5.13	3.47	0.12064	0.739367	PRRX1;BMP7
GO:0030501_positive_regulation_of_bone_mineralization	39	5.13	3.47	0.12064	0.739367	BMP7;BMPR1A
GO:0032467_positive_regulation_of_cytokinesis	39	5.13	3.47	0.12064	0.739367	CDC25B;AURKB
GO:0007018_microtubule-based_movement	79	3.8	2.54	0.122095	0.746034	KIFC1;KIF22;KIF18B
GO:0015031_protein_transport	320	2.5	1.65	0.122242	0.746034	ARRDC3;EXOC3;EXOC7;ARRDC4;TXNIP;ATG9A;ZMAT3;SNX4
GO:0001541_ovarian_follicle_development	40	5	3.38	0.125757	0.756365	ICAM1;FANCG
GO:0005975_carbohydrate_metabolic_process	124	3.23	2.15	0.124504	0.756365	POMT1;IDH3G;GLB1L2;HYAL2
GO:0006687_glycosphingolipid_metabolic_process	40	5	3.38	0.125757	0.756365	SMPD4;GBA2
GO:0006865_amino_acid_transport	40	5	3.38	0.125757	0.756365	SLC7A11;SFXN5
GO:0007098_centrosome_cycle	40	5	3.38	0.125757	0.756365	PLK1;HAUS5
GO:0032781_positive_regulation_of_ATPase_activity	40	5	3.38	0.125757	0.756365	DNAJA1;DNAJB1
GO:0045184_establishment_of_protein_localization	40	5	3.38	0.125757	0.756365	MDM2;PLK1
GO:0000012_single_strand_break_repair	9	11.11	8.02	0.13018	0.768356	XRCC1
GO:0000722_telomere_maintenance_via_recombination	9	11.11	8.02	0.13018	0.768356	XRCC3
GO:0006265_DNA_topological_change	9	11.11	8.02	0.13018	0.768356	TOP3A
GO:0006474_N-terminal_protein_amino_acid_acetylation	9	11.11	8.02	0.13018	0.768356	NAA40
GO:0031667_response_to_nutrient_levels	41	4.88	3.3	0.130925	0.768356	ACACB;MBD1
GO:0043407_negative_regulation_of_MAP_kinase_activity	41	4.88	3.3	0.130925	0.768356	BMP7;HYAL2
GO:0045071_negative_regulation_of_viral_genome_replication	41	4.88	3.3	0.130925	0.768356	ILF3;IFIT5
GO:0050650_chondroitin_sulfate_proteoglycan_biosynthetic_process	9	11.11	8.02	0.13018	0.768356	XYLT2
GO:0051591_response_to_cAMP	41	4.88	3.3	0.130925	0.768356	BIRC2;RELA
GO:0060907_positive_regulation_of_macrophage_cytokine_production	9	11.11	8.02	0.13018	0.768356	SEMA7A
GO:0070317_negative_regulation_of_G0_to_G1_transition	41	4.88	3.3	0.130925	0.768356	E2F1;TFDP1
GO:0071028_nuclear_mRNA_surveillance	9	11.11	8.02	0.13018	0.768356	DXO
GO:0000076_DNA_replication_checkpoint	10	10	7.13	0.143558	0.769857	RAD9A
GO:0000302_response_to_reactive_oxygen_species	13	7.69	5.35	0.182473	0.769857	HYAL2
GO:0000338_protein_deneddylation	10	10	7.13	0.143558	0.769857	COPS7B
GO:0000460_maturation_of_5.8S_rRNA	13	7.69	5.35	0.182473	0.769857	MAK16
GO:0000470_maturation_of_LSU-rRNA	13	7.69	5.35	0.182473	0.769857	MAK16
GO:0000731_DNA_synthesis_involved_in_DNA_repair	12	8.33	5.83	0.169701	0.769857	POLE
GO:0001504_neurotransmitter_uptake	12	8.33	5.83	0.169701	0.769857	SLC29A2
GO:0001525_angiogenesis	238	2.52	1.67	0.161802	0.769857	CCL2;CXCL8;THY1;EPHB3;CCDC134;SEMA4A
GO:0001568_blood_vessel_development	43	4.65	3.13	0.141401	0.769857	MDM2;PAX6
GO:0001655_urogenital_system_development	12	8.33	5.83	0.169701	0.769857	EPHB3
GO:0001823_mesonephros_development	11	9.09	6.42	0.156731	0.769857	BMP7
GO:0001829_trophectodermal_cell_differentiation	13	7.69	5.35	0.182473	0.769857	SRF
GO:0001921_positive_regulation_of_receptor_recycling	14	7.14	4.94	0.195048	0.769857	EPS15
GO:0002523_leukocyte_migration_involved_in_inflammatory_response	11	9.09	6.42	0.156731	0.769857	SELE
GO:0002675_positive_regulation_of_acute_inflammatory_response	13	7.69	5.35	0.182473	0.769857	IL6ST
GO:0002690_positive_regulation_of_leukocyte_chemotaxis	13	7.69	5.35	0.182473	0.769857	F2RL1
GO:0003085_negative_regulation_of_systemic_arterial_blood_pressure	13	7.69	5.35	0.182473	0.769857	ARHGAP42
GO:0003181_atrioventricular_valve_morphogenesis	12	8.33	5.83	0.169701	0.769857	MDM2
GO:0003215_cardiac_right_ventricle_morphogenesis	13	7.69	5.35	0.182473	0.769857	BMPR1A
GO:0006044_N-acetylglucosamine_metabolic_process	14	7.14	4.94	0.195048	0.769857	NAGK
GO:0006094_gluconeogenesis	45	4.44	2.99	0.152049	0.769857	ATF3;CRTC2
GO:0006110_regulation_of_glycolytic_process	42	4.76	3.21	0.13614	0.769857	AAAS;NUP210
GO:0006171_cAMP_biosynthetic_process	10	10	7.13	0.143558	0.769857	ADCY3
GO:0006366_transcription_by_RNA_polymerase_II	188	2.66	1.76	0.164642	0.769857	TAF1C;RPAP1;MBD1;PAX6;TFDP1
GO:0006486_protein_glycosylation	89	3.37	2.24	0.157475	0.769857	MAN2A2;B3GALT2;MAN1B1
GO:0006497_protein_lipidation	11	9.09	6.42	0.156731	0.769857	WDR45
GO:0006635_fatty_acid_beta-oxidation	44	4.55	3.06	0.146705	0.769857	ABCD4;ACADVL
GO:0006700_C21-steroid_hormone_biosynthetic_process	12	8.33	5.83	0.169701	0.769857	TSPOAP1
GO:0006751_glutathione_catabolic_process	11	9.09	6.42	0.156731	0.769857	GGT7
GO:0006811_ion_transport	98	3.06	2.03	0.191638	0.769857	CNNM3;SLC26A6;CLDN15
GO:0006853_carnitine_shuttle	11	9.09	6.42	0.156731	0.769857	ACACB
GO:0006885_regulation_of_pH	12	8.33	5.83	0.169701	0.769857	EDNRB
GO:0006897_endocytosis	185	2.7	1.79	0.157221	0.769857	SCARA3;EPS15;PIK3CB;CYTH2;BIN1
GO:0006919_activation_of_cysteine-type_endopeptidase_activity_involved_in_apoptotic_process	84	3.57	2.38	0.139402	0.769857	HIP1R;IFT57;HSPD1
GO:0007064_mitotic_sister_chromatid_cohesion	13	7.69	5.35	0.182473	0.769857	REC8
GO:0007077_mitotic_nuclear_envelope_disassembly	12	8.33	5.83	0.169701	0.769857	PLK1
GO:0007096_regulation_of_exit_from_mitosis	12	8.33	5.83	0.169701	0.769857	SIRT2
GO:0007166_cell_surface_receptor_signaling_pathway	232	2.59	1.71	0.148989	0.769857	CXCL10;CCL2;BIRC3;BIRC2;RANBP10;EDNRB
GO:0007283_spermatogenesis	414	2.17	1.43	0.189715	0.769857	E2F1;BIRC3;KIFC1;GGT7;PATZ1;BRD2;REC8;ANKRD49;POC1A
GO:0007286_spermatid_development	84	3.57	2.38	0.139402	0.769857	FANCG;REC8;UBE2J1
GO:0007346_regulation_of_mitotic_cell_cycle	44	4.55	3.06	0.146705	0.769857	PLK1;CDK10
GO:0007398_ectoderm_development	13	7.69	5.35	0.182473	0.769857	BMPR1A
GO:0007595_lactation	46	4.35	2.92	0.15743	0.769857	STAT5B;SOCS2
GO:0008206_bile_acid_metabolic_process	14	7.14	4.94	0.195048	0.769857	GBA2
GO:0008272_sulfate_transport	13	7.69	5.35	0.182473	0.769857	SLC26A6
GO:0008285_negative_regulation_of_cell_population_proliferation	433	2.31	1.53	0.133117	0.769857	HSPA1A;CXCL8;CDK10;WDR6;GAS8;SIRT2;P3H3;RAF1;ING5;SRF
GO:0008608_attachment_of_spindle_microtubules_to_kinetochore	10	10	7.13	0.143558	0.769857	AURKB
GO:0009303_rRNA_transcription	13	7.69	5.35	0.182473	0.769857	NPM3
GO:0009312_oligosaccharide_biosynthetic_process	13	7.69	5.35	0.182473	0.769857	B3GALT2
GO:0009408_response_to_heat	42	4.76	3.21	0.13614	0.769857	HSP90AA1;DNAJA1
GO:0009650_UV_protection	13	7.69	5.35	0.182473	0.769857	SCARA3
GO:0009887_animal_organ_morphogenesis	134	2.99	1.98	0.152098	0.769857	CCL2;MEIS3;RELA;PAX6
GO:0010390_histone_monoubiquitination	12	8.33	5.83	0.169701	0.769857	UHRF1
GO:0010739_positive_regulation_of_protein_kinase_A_signaling	11	9.09	6.42	0.156731	0.769857	TCIM
GO:0010745_negative_regulation_of_macrophage_derived_foam_cell_differentiation	13	7.69	5.35	0.182473	0.769857	NFKBIA
GO:0010761_fibroblast_migration	13	7.69	5.35	0.182473	0.769857	ILK
GO:0010763_positive_regulation_of_fibroblast_migration	14	7.14	4.94	0.195048	0.769857	DDR2
GO:0010818_T_cell_chemotaxis	12	8.33	5.83	0.169701	0.769857	CXCL10
GO:0010838_positive_regulation_of_keratinocyte_proliferation	14	7.14	4.94	0.195048	0.769857	HAS2
GO:0010862_positive_regulation_of_pathway-restricted_SMAD_protein_phosphorylation	48	4.17	2.79	0.168297	0.769857	BMP7;BMPR1A
GO:0010884_positive_regulation_of_lipid_storage	13	7.69	5.35	0.182473	0.769857	ACACB
GO:0010923_negative_regulation_of_phosphatase_activity	50	4	2.68	0.179286	0.769857	PKMYT1;SFI1
GO:0010952_positive_regulation_of_peptidase_activity	13	7.69	5.35	0.182473	0.769857	MAPK12
GO:0010996_response_to_auditory_stimulus	14	7.14	4.94	0.195048	0.769857	CXCL10
GO:0014075_response_to_amine	11	9.09	6.42	0.156731	0.769857	RRM2B
GO:0015012_heparan_sulfate_proteoglycan_biosynthetic_process	14	7.14	4.94	0.195048	0.769857	XYLT2
GO:0015937_coenzyme_A_biosynthetic_process	10	10	7.13	0.143558	0.769857	PPCDC
GO:0016050_vesicle_organization	13	7.69	5.35	0.182473	0.769857	EPS15
GO:0016081_synaptic_vesicle_docking	11	9.09	6.42	0.156731	0.769857	STX1A
GO:0016236_macroautophagy	93	3.23	2.14	0.172422	0.769857	DYNLL2;DYNLL1;UBQLN1
GO:0016358_dendrite_development	42	4.76	3.21	0.13614	0.769857	BMP7;IGSF9
GO:0016446_somatic_hypermutation_of_immunoglobulin_genes	13	7.69	5.35	0.182473	0.769857	POLM
GO:0016558_protein_import_into_peroxisome_matrix	11	9.09	6.42	0.156731	0.769857	PEX6
GO:0016578_histone_deubiquitination	13	7.69	5.35	0.182473	0.769857	USP21
GO:0018022_peptidyl-lysine_methylation	12	8.33	5.83	0.169701	0.769857	METTL22
GO:0018401_peptidyl-proline_hydroxylation_to_4-hydroxy-L-proline	11	9.09	6.42	0.156731	0.769857	P4HA1
GO:0019079_viral_genome_replication	14	7.14	4.94	0.195048	0.769857	CCL2
GO:0019532_oxalate_transport	10	10	7.13	0.143558	0.769857	SLC26A6
GO:0019722_calcium-mediated_signaling	84	3.57	2.38	0.139402	0.769857	SELE;CXCL8;EDNRB
GO:0019725_cellular_homeostasis	13	7.69	5.35	0.182473	0.769857	CCL2
GO:0019827_stem_cell_population_maintenance	51	3.92	2.62	0.184821	0.769857	DDX6;BMPR1A
GO:0021756_striatum_development	12	8.33	5.83	0.169701	0.769857	SLC7A11
GO:0021954_central_nervous_system_neuron_development	14	7.14	4.94	0.195048	0.769857	GBA2
GO:0022038_corpus_callosum_development	14	7.14	4.94	0.195048	0.769857	EPHB3
GO:0022407_regulation_of_cell-cell_adhesion	11	9.09	6.42	0.156731	0.769857	EPHB3
GO:0030042_actin_filament_depolymerization	11	9.09	6.42	0.156731	0.769857	MICAL1
GO:0030155_regulation_of_cell_adhesion	49	4.08	2.73	0.173777	0.769857	CXCL8;SRF
GO:0030208_dermatan_sulfate_biosynthetic_process	12	8.33	5.83	0.169701	0.769857	DSEL
GO:0030259_lipid_glycosylation	12	8.33	5.83	0.169701	0.769857	GBA2
GO:0030311_poly-N-acetyllactosamine_biosynthetic_process	12	8.33	5.83	0.169701	0.769857	B3GALT2
GO:0030518_intracellular_steroid_hormone_receptor_signaling_pathway	11	9.09	6.42	0.156731	0.769857	CALCOCO1
GO:0030838_positive_regulation_of_actin_filament_polymerization	51	3.92	2.62	0.184821	0.769857	ICAM1;BIN1
GO:0030900_forebrain_development	46	4.35	2.92	0.15743	0.769857	E2F1;DNAJB1
GO:0031100_animal_organ_regeneration	43	4.65	3.13	0.141401	0.769857	NR4A3;CDK4
GO:0031113_regulation_of_microtubule_polymerization	11	9.09	6.42	0.156731	0.769857	GBA2
GO:0031274_positive_regulation_of_pseudopodium_assembly	13	7.69	5.35	0.182473	0.769857	F2RL1
GO:0031629_synaptic_vesicle_fusion_to_presynaptic_active_zone_membrane	13	7.69	5.35	0.182473	0.769857	STX1A
GO:0031669_cellular_response_to_nutrient_levels	14	7.14	4.94	0.195048	0.769857	ICAM1
GO:0032026_response_to_magnesium_ion	12	8.33	5.83	0.169701	0.769857	MDM2
GO:0032088_negative_regulation_of_NF-kappaB_transcription_factor_activity	88	3.41	2.27	0.153804	0.769857	TNFAIP3;NFKBIA;BMP7
GO:0032230_positive_regulation_of_synaptic_transmission,_GABAergic	13	7.69	5.35	0.182473	0.769857	CA2
GO:0032434_regulation_of_proteasomal_ubiquitin-dependent_protein_catabolic_process	13	7.69	5.35	0.182473	0.769857	UBQLN4
GO:0032465_regulation_of_cytokinesis	42	4.76	3.21	0.13614	0.769857	PLK1;AURKB
GO:0032481_positive_regulation_of_type_I_interferon_production	52	3.85	2.57	0.19038	0.769857	NFKB2;RELA
GO:0032496_response_to_lipopolysaccharide	138	2.9	1.92	0.163734	0.769857	SELE;NFKB2;GGT7;HSPD1
GO:0032570_response_to_progesterone	42	4.76	3.21	0.13614	0.769857	TXNIP;RELA
GO:0032611_interleukin-1_beta_production	13	7.69	5.35	0.182473	0.769857	F2RL1
GO:0032688_negative_regulation_of_interferon-beta_production	14	7.14	4.94	0.195048	0.769857	RELB
GO:0032755_positive_regulation_of_interleukin-6_production	88	3.41	2.27	0.153804	0.769857	F2RL1;HYAL2;HSPD1
GO:0032963_collagen_metabolic_process	14	7.14	4.94	0.195048	0.769857	P3H3
GO:0033173_calcineurin-NFAT_signaling_cascade	12	8.33	5.83	0.169701	0.769857	NFATC2
GO:0033235_positive_regulation_of_protein_sumoylation	12	8.33	5.83	0.169701	0.769857	PIAS3
GO:0033539_fatty_acid_beta-oxidation_using_acyl-CoA_dehydrogenase	10	10	7.13	0.143558	0.769857	ACADVL
GO:0033962_P-body_assembly	13	7.69	5.35	0.182473	0.769857	DDX6
GO:0034144_negative_regulation_of_toll-like_receptor_4_signaling_pathway	13	7.69	5.35	0.182473	0.769857	TNFAIP3
GO:0034198_cellular_response_to_amino_acid_starvation	44	4.55	3.06	0.146705	0.769857	ATF3;HNRNPL
GO:0034356_NAD_biosynthesis_via_nicotinamide_riboside_salvage_pathway	14	7.14	4.94	0.195048	0.769857	NAMPT
GO:0034501_protein_localization_to_kinetochore	11	9.09	6.42	0.156731	0.769857	AURKB
GO:0034599_cellular_response_to_oxidative_stress	94	3.19	2.12	0.176221	0.769857	HSPA1A;SLC7A11;SIRT2
GO:0034638_phosphatidylcholine_catabolic_process	12	8.33	5.83	0.169701	0.769857	PLA2G6
GO:0035493_SNARE_complex_assembly	11	9.09	6.42	0.156731	0.769857	STX1A
GO:0035723_interleukin-15-mediated_signaling_pathway	13	7.69	5.35	0.182473	0.769857	STAT5B
GO:0035815_positive_regulation_of_renal_sodium_excretion	14	7.14	4.94	0.195048	0.769857	EDNRB
GO:0035871_protein_K11-linked_deubiquitination	10	10	7.13	0.143558	0.769857	TNFAIP3
GO:0035914_skeletal_muscle_cell_differentiation	45	4.44	2.99	0.152049	0.769857	ATF3;LEMD2
GO:0035988_chondrocyte_proliferation	10	10	7.13	0.143558	0.769857	DDR2
GO:0035999_tetrahydrofolate_interconversion	10	10	7.13	0.143558	0.769857	MTHFR
GO:0036092_phosphatidylinositol-3-phosphate_biosynthetic_process	14	7.14	4.94	0.195048	0.769857	PIK3CB
GO:0038063_collagen-activated_tyrosine_kinase_receptor_signaling_pathway	12	8.33	5.83	0.169701	0.769857	DDR2
GO:0038110_interleukin-2-mediated_signaling_pathway	11	9.09	6.42	0.156731	0.769857	STAT5B
GO:0040015_negative_regulation_of_multicellular_organism_growth	11	9.09	6.42	0.156731	0.769857	SOCS2
GO:0042110_T_cell_activation	44	4.55	3.06	0.146705	0.769857	CD276;HSPD1
GO:0042789_mRNA_transcription_by_RNA_polymerase_II	11	9.09	6.42	0.156731	0.769857	SRF
GO:0043086_negative_regulation_of_catalytic_activity	52	3.85	2.57	0.19038	0.769857	ACACB;TXNIP
GO:0043114_regulation_of_vascular_permeability	12	8.33	5.83	0.169701	0.769857	AZU1
GO:0043116_negative_regulation_of_vascular_permeability	14	7.14	4.94	0.195048	0.769857	PDE2A
GO:0043117_positive_regulation_of_vascular_permeability	11	9.09	6.42	0.156731	0.769857	PDE2A
GO:0043124_negative_regulation_of_I-kappaB_kinase/NF-kappaB_signaling	51	3.92	2.62	0.184821	0.769857	TNFAIP3;MAPKBP1
GO:0043161_proteasome-mediated_ubiquitin-dependent_protein_catabolic_process	181	2.76	1.83	0.14755	0.769857	KLHL22;MDM2;RMND5B;BIRC2;SIRT2
GO:0043303_mast_cell_degranulation	14	7.14	4.94	0.195048	0.769857	NR4A3
GO:0043434_response_to_peptide_hormone	48	4.17	2.79	0.168297	0.769857	STAT5B;BMP7
GO:0043589_skin_morphogenesis	11	9.09	6.42	0.156731	0.769857	SRF
GO:0043687_post-translational_protein_modification	344	2.33	1.54	0.162399	0.769857	KLHL22;FEM1B;COPS7B;SOCS2;CUL9;BTBD1;DNAJC3;QSOX1
GO:0045059_positive_thymic_T_cell_selection	11	9.09	6.42	0.156731	0.769857	SRF
GO:0045348_positive_regulation_of_MHC_class_II_biosynthetic_process	10	10	7.13	0.143558	0.769857	AZU1
GO:0045429_positive_regulation_of_nitric_oxide_biosynthetic_process	45	4.44	2.99	0.152049	0.769857	ICAM1;HSP90AA1
GO:0045475_locomotor_rhythm	12	8.33	5.83	0.169701	0.769857	ID2
GO:0045579_positive_regulation_of_B_cell_differentiation	13	7.69	5.35	0.182473	0.769857	STAT5B
GO:0045651_positive_regulation_of_macrophage_differentiation	14	7.14	4.94	0.195048	0.769857	ID2
GO:0045744_negative_regulation_of_G_protein-coupled_receptor_signaling_pathway	14	7.14	4.94	0.195048	0.769857	CXCL8
GO:0045892_negative_regulation_of_transcription,_DNA-templated	528	2.08	1.37	0.192551	0.769857	E2F1;ILF3;MDM2;HSPA8;ID4;PATZ1;BMP7;ID2;SIRT2;MBD1;RELA
GO:0046549_retinal_cone_cell_development	11	9.09	6.42	0.156731	0.769857	THY1
GO:0046626_regulation_of_insulin_receptor_signaling_pathway	13	7.69	5.35	0.182473	0.769857	CDK4
GO:0046685_response_to_arsenic-containing_substance	13	7.69	5.35	0.182473	0.769857	SRRT
GO:0046688_response_to_copper_ion	14	7.14	4.94	0.195048	0.769857	ICAM1
GO:0046902_regulation_of_mitochondrial_membrane_permeability	10	10	7.13	0.143558	0.769857	SPG7
GO:0046931_pore_complex_assembly	11	9.09	6.42	0.156731	0.769857	PLEKHA7
GO:0046940_nucleoside_monophosphate_phosphorylation	13	7.69	5.35	0.182473	0.769857	PNKP
GO:0048012_hepatocyte_growth_factor_receptor_signaling_pathway	12	8.33	5.83	0.169701	0.769857	SIRT2
GO:0048546_digestive_tract_morphogenesis	14	7.14	4.94	0.195048	0.769857	EPHB3
GO:0050885_neuromuscular_process_controlling_balance	44	4.55	3.06	0.146705	0.769857	IGDCC3;NR4A3
GO:0050892_intestinal_absorption	14	7.14	4.94	0.195048	0.769857	SLC26A6
GO:0050910_detection_of_mechanical_stimulus_involved_in_sensory_perception_of_sound	13	7.69	5.35	0.182473	0.769857	COL11A1
GO:0050927_positive_regulation_of_positive_chemotaxis	12	8.33	5.83	0.169701	0.769857	F2RL1
GO:0050966_detection_of_mechanical_stimulus_involved_in_sensory_perception_of_pain	14	7.14	4.94	0.195048	0.769857	CACNB3
GO:0051056_regulation_of_small_GTPase_mediated_signal_transduction	141	2.84	1.88	0.172666	0.769857	ARHGAP44;ARHGEF1;FGD3;PLEKHG2
GO:0051310_metaphase_plate_congression	13	7.69	5.35	0.182473	0.769857	KIF22
GO:0051382_kinetochore_assembly	14	7.14	4.94	0.195048	0.769857	CENPT
GO:0051489_regulation_of_filopodium_assembly	14	7.14	4.94	0.195048	0.769857	FXR1
GO:0051549_positive_regulation_of_keratinocyte_migration	12	8.33	5.83	0.169701	0.769857	HAS2
GO:0051561_positive_regulation_of_mitochondrial_calcium_ion_concentration	11	9.09	6.42	0.156731	0.769857	ATP2A1
GO:0051926_negative_regulation_of_calcium_ion_transport	14	7.14	4.94	0.195048	0.769857	ICAM1
GO:0051967_negative_regulation_of_synaptic_transmission,_glutamatergic	10	10	7.13	0.143558	0.769857	PLA2G6
GO:0055003_cardiac_myofibril_assembly	12	8.33	5.83	0.169701	0.769857	SRF
GO:0055114_oxidation-reduction_process	528	2.08	1.37	0.192551	0.769857	VCAM1;MICAL1;QSOX2;ACAD9;P4HA1;CYP39A1;MTHFR;P3H3;CYP46A1;RRM2B;QSOX1
GO:0060100_positive_regulation_of_phagocytosis,_engulfment	12	8.33	5.83	0.169701	0.769857	F2RL1
GO:0060271_cilium_assembly	191	2.62	1.73	0.172198	0.769857	DYNLL2;DYNLL1;TEKT1;WDR90;STK36
GO:0060322_head_development	12	8.33	5.83	0.169701	0.769857	EDNRA
GO:0060354_negative_regulation_of_cell_adhesion_molecule_production	11	9.09	6.42	0.156731	0.769857	CXCL8
GO:0060397_growth_hormone_receptor_signaling_pathway_via_JAK-STAT	14	7.14	4.94	0.195048	0.769857	STAT5B
GO:0060402_calcium_ion_transport_into_cytosol	12	8.33	5.83	0.169701	0.769857	CACNB3
GO:0060425_lung_morphogenesis	13	7.69	5.35	0.182473	0.769857	SRF
GO:0060445_branching_involved_in_salivary_gland_morphogenesis	11	9.09	6.42	0.156731	0.769857	BMP7
GO:0061029_eyelid_development_in_camera-type_eye	13	7.69	5.35	0.182473	0.769857	SRF
GO:0061462_protein_localization_to_lysosome	11	9.09	6.42	0.156731	0.769857	GGA3
GO:0061635_regulation_of_protein_complex_stability	11	9.09	6.42	0.156731	0.769857	HSPA8
GO:0061709_reticulophagy	12	8.33	5.83	0.169701	0.769857	RETREG1
GO:0070106_interleukin-27-mediated_signaling_pathway	11	9.09	6.42	0.156731	0.769857	IL6ST
GO:0070286_axonemal_dynein_complex_assembly	11	9.09	6.42	0.156731	0.769857	SPAG1
GO:0070306_lens_fiber_cell_differentiation	12	8.33	5.83	0.169701	0.769857	SLC7A11
GO:0070528_protein_kinase_C_signaling	14	7.14	4.94	0.195048	0.769857	AZU1
GO:0070633_transepithelial_transport	10	10	7.13	0.143558	0.769857	SLC26A6
GO:0070757_interleukin-35-mediated_signaling_pathway	11	9.09	6.42	0.156731	0.769857	IL6ST
GO:0070933_histone_H4_deacetylation	11	9.09	6.42	0.156731	0.769857	SIRT2
GO:0071223_cellular_response_to_lipoteichoic_acid	10	10	7.13	0.143558	0.769857	RELA
GO:0071233_cellular_response_to_leucine	10	10	7.13	0.143558	0.769857	KLHL22
GO:0071285_cellular_response_to_lithium_ion	14	7.14	4.94	0.195048	0.769857	ID2
GO:0071320_cellular_response_to_cAMP	52	3.85	2.57	0.19038	0.769857	PDE2A;SLC26A6
GO:0071346_cellular_response_to_interferon-gamma	96	3.12	2.07	0.183886	0.769857	CCL2;SLC26A6;AQP4
GO:0071364_cellular_response_to_epidermal_growth_factor_stimulus	43	4.65	3.13	0.141401	0.769857	STAT5B;MCM7
GO:0071872_cellular_response_to_epinephrine_stimulus	13	7.69	5.35	0.182473	0.769857	SIRT2
GO:0072425_signal_transduction_involved_in_G2_DNA_damage_checkpoint	11	9.09	6.42	0.156731	0.769857	PLK1
GO:0072520_seminiferous_tubule_development	12	8.33	5.83	0.169701	0.769857	REC8
GO:0072711_cellular_response_to_hydroxyurea	12	8.33	5.83	0.169701	0.769857	DDX11
GO:0075733_intracellular_transport_of_virus	50	4	2.68	0.179286	0.769857	AAAS;NUP210
GO:0090110_COPII-coated_vesicle_cargo_loading	14	7.14	4.94	0.195048	0.769857	SEC24D
GO:0090162_establishment_of_epithelial_cell_polarity	13	7.69	5.35	0.182473	0.769857	HES5
GO:0090179_planar_cell_polarity_pathway_involved_in_neural_tube_closure	12	8.33	5.83	0.169701	0.769857	DVL2
GO:0090181_regulation_of_cholesterol_metabolic_process	14	7.14	4.94	0.195048	0.769857	ACADVL
GO:0090263_positive_regulation_of_canonical_Wnt_signaling_pathway	147	2.72	1.8	0.191012	0.769857	RNF220;ILK;RSPO3;JRK
GO:0090394_negative_regulation_of_excitatory_postsynaptic_potential	11	9.09	6.42	0.156731	0.769857	TMEM25
GO:0090557_establishment_of_endothelial_intestinal_barrier	11	9.09	6.42	0.156731	0.769857	ICAM1
GO:0090656_t-circle_formation	12	8.33	5.83	0.169701	0.769857	XRCC3
GO:0097178_ruffle_assembly	14	7.14	4.94	0.195048	0.769857	AIF1L
GO:0097428_protein_maturation_by_iron-sulfur_cluster_transfer	11	9.09	6.42	0.156731	0.769857	MMS19
GO:0097435_supramolecular_fiber_organization	13	7.69	5.35	0.182473	0.769857	ILK
GO:0098761_cellular_response_to_interleukin-7	12	8.33	5.83	0.169701	0.769857	HSPD1
GO:0098789_pre-mRNA_cleavage_required_for_polyadenylation	13	7.69	5.35	0.182473	0.769857	CPSF4
GO:0099509_regulation_of_presynaptic_cytosolic_calcium_ion_concentration	13	7.69	5.35	0.182473	0.769857	TSPOAP1
GO:0106074_aminoacyl-tRNA_metabolism_involved_in_translational_fidelity	13	7.69	5.35	0.182473	0.769857	VARS2
GO:1901380_negative_regulation_of_potassium_ion_transmembrane_transport	10	10	7.13	0.143558	0.769857	BIN1
GO:1901386_negative_regulation_of_voltage-gated_calcium_channel_activity	10	10	7.13	0.143558	0.769857	CACNB3
GO:1901750_leukotriene_D4_biosynthetic_process	10	10	7.13	0.143558	0.769857	GGT7
GO:1901838_positive_regulation_of_transcription_of_nucleolar_large_rRNA_by_RNA_polymerase_I	10	10	7.13	0.143558	0.769857	DDX11
GO:1903265_positive_regulation_of_tumor_necrosis_factor-mediated_signaling_pathway	11	9.09	6.42	0.156731	0.769857	HSPA1A
GO:1903506_regulation_of_nucleic_acid-templated_transcription	12	8.33	5.83	0.169701	0.769857	PXN
GO:1903800_positive_regulation_of_production_of_miRNAs_involved_in_gene_silencing_by_miRNA	11	9.09	6.42	0.156731	0.769857	MYCN
GO:1904322_cellular_response_to_forskolin	11	9.09	6.42	0.156731	0.769857	ADCY3
GO:1904380_endoplasmic_reticulum_mannose_trimming	14	7.14	4.94	0.195048	0.769857	MAN1B1
GO:1904385_cellular_response_to_angiotensin	11	9.09	6.42	0.156731	0.769857	RELA
GO:1904668_positive_regulation_of_ubiquitin_protein_ligase_activity	14	7.14	4.94	0.195048	0.769857	PLK1
GO:1905515_non-motile_cilium_assembly	46	4.35	2.92	0.15743	0.769857	POC1A;IFT57
GO:1990000_amyloid_fibril_formation	11	9.09	6.42	0.156731	0.769857	MDM2
GO:1990440_positive_regulation_of_transcription_from_RNA_polymerase_II_promoter_in_response_to_endoplasmic_reticulum_stress	11	9.09	6.42	0.156731	0.769857	ATF3
GO:1990830_cellular_response_to_leukemia_inhibitory_factor	97	3.09	2.05	0.187752	0.769857	ICAM1;ABCD4;PAX6
GO:2000304_positive_regulation_of_ceramide_biosynthetic_process	12	8.33	5.83	0.169701	0.769857	PLA2G6
GO:2000637_positive_regulation_of_gene_silencing_by_miRNA	11	9.09	6.42	0.156731	0.769857	FXR1
GO:2000772_regulation_of_cellular_senescence	12	8.33	5.83	0.169701	0.769857	BMPR1A
GO:2000781_positive_regulation_of_double-strand_break_repair	12	8.33	5.83	0.169701	0.769857	DDX11
GO:2001022_positive_regulation_of_response_to_DNA_damage_stimulus	13	7.69	5.35	0.182473	0.769857	FXR1
GO:2001223_negative_regulation_of_neuron_migration	12	8.33	5.83	0.169701	0.769857	GPR173
GO:0030216_keratinocyte_differentiation	53	3.77	2.52	0.195961	0.771365	TXNIP;PAX6
GO:0045668_negative_regulation_of_osteoblast_differentiation	53	3.77	2.52	0.195961	0.771365	HDAC7;ID2
GO:0016192_vesicle-mediated_transport	149	2.68	1.77	0.197261	0.77543	HSPA1A;HSPA8;KXD1;SYT4
GO:0000079_regulation_of_cyclin-dependent_protein_serine/threonine_kinase_activity	55	3.64	2.42	0.207182	0.779542	PKMYT1;CDK4
GO:0000956_nuclear-transcribed_mRNA_catabolic_process	15	6.67	4.58	0.207431	0.779542	DXO
GO:0001701_in_utero_embryonic_development	202	2.48	1.63	0.20099	0.779542	EDNRA;SMPD4;BMPR1A;SMG9;SEC24D
GO:0006473_protein_acetylation	15	6.67	4.58	0.207431	0.779542	ING5
GO:0006646_phosphatidylethanolamine_biosynthetic_process	15	6.67	4.58	0.207431	0.779542	PISD
GO:0006750_glutathione_biosynthetic_process	15	6.67	4.58	0.207431	0.779542	GGT7
GO:0006895_Golgi_to_endosome_transport	15	6.67	4.58	0.207431	0.779542	EPS15
GO:0007019_microtubule_depolymerization	15	6.67	4.58	0.207431	0.779542	KIF18B
GO:0007204_positive_regulation_of_cytosolic_calcium_ion_concentration	151	2.65	1.75	0.203571	0.779542	F2RL1;EDNRA;PLA2G6;EDNRB
GO:0009306_protein_secretion	54	3.7	2.47	0.201563	0.779542	TANGO2;NECAB3
GO:0010955_negative_regulation_of_protein_processing	15	6.67	4.58	0.207431	0.779542	MDM2
GO:0016242_negative_regulation_of_macroautophagy	15	6.67	4.58	0.207431	0.779542	QSOX1
GO:0021675_nerve_development	15	6.67	4.58	0.207431	0.779542	ILK
GO:0030168_platelet_activation	101	2.97	1.97	0.203416	0.779542	RAF1;SRF;PIK3CB
GO:0031573_intra-S_DNA_damage_checkpoint	15	6.67	4.58	0.207431	0.779542	RAD9A
GO:0032516_positive_regulation_of_phosphoprotein_phosphatase_activity	15	6.67	4.58	0.207431	0.779542	VRK3
GO:0043518_negative_regulation_of_DNA_damage_response,_signal_transduction_by_p53_class_mediator	15	6.67	4.58	0.207431	0.779542	MDM2
GO:0043951_negative_regulation_of_cAMP-mediated_signaling	15	6.67	4.58	0.207431	0.779542	PDE2A
GO:0044849_estrous_cycle	15	6.67	4.58	0.207431	0.779542	HAS2
GO:0045747_positive_regulation_of_Notch_signaling_pathway	54	3.7	2.47	0.201563	0.779542	IL6ST;HES5
GO:0045779_negative_regulation_of_bone_resorption	15	6.67	4.58	0.207431	0.779542	TNFAIP3
GO:0046328_regulation_of_JNK_cascade	15	6.67	4.58	0.207431	0.779542	F2RL1
GO:0046475_glycerophospholipid_catabolic_process	15	6.67	4.58	0.207431	0.779542	SMPD4
GO:0050862_positive_regulation_of_T_cell_receptor_signaling_pathway	15	6.67	4.58	0.207431	0.779542	RELA
GO:0060347_heart_trabecula_formation	15	6.67	4.58	0.207431	0.779542	SRF
GO:0060996_dendritic_spine_development	15	6.67	4.58	0.207431	0.779542	EPHB3
GO:0061564_axon_development	15	6.67	4.58	0.207431	0.779542	PLP1
GO:0070262_peptidyl-serine_dephosphorylation	15	6.67	4.58	0.207431	0.779542	PPP5C
GO:0072659_protein_localization_to_plasma_membrane	152	2.63	1.74	0.206748	0.779542	CACNB3;PPIL2;TTC7A;ZDHHC22
GO:1900006_positive_regulation_of_dendrite_development	15	6.67	4.58	0.207431	0.779542	BMP7
GO:1900271_regulation_of_long-term_synaptic_potentiation	15	6.67	4.58	0.207431	0.779542	CYP46A1
GO:2000406_positive_regulation_of_T_cell_migration	15	6.67	4.58	0.207431	0.779542	CXCL10
GO:2000737_negative_regulation_of_stem_cell_differentiation	15	6.67	4.58	0.207431	0.779542	HES5
GO:2001034_positive_regulation_of_double-strand_break_repair_via_nonhomologous_end_joining	15	6.67	4.58	0.207431	0.779542	PNKP
GO:0000038_very_long-chain_fatty_acid_metabolic_process	16	6.25	4.28	0.219623	0.793539	ACSBG1
GO:0003222_ventricular_trabecula_myocardium_morphogenesis	16	6.25	4.28	0.219623	0.793539	BMPR1A
GO:0006349_regulation_of_gene_expression_by_genetic_imprinting	16	6.25	4.28	0.219623	0.793539	PRMT7
GO:0006833_water_transport	16	6.25	4.28	0.219623	0.793539	AQP4
GO:0006936_muscle_contraction	105	2.86	1.89	0.219369	0.793539	PXN;ACTA2;ACTG2
GO:0006939_smooth_muscle_contraction	16	6.25	4.28	0.219623	0.793539	EDNRA
GO:0007405_neuroblast_proliferation	16	6.25	4.28	0.219623	0.793539	ID4
GO:0010586_miRNA_metabolic_process	16	6.25	4.28	0.219623	0.793539	DGCR8
GO:0010765_positive_regulation_of_sodium_ion_transport	16	6.25	4.28	0.219623	0.793539	CNTN1
GO:0014002_astrocyte_development	16	6.25	4.28	0.219623	0.793539	PLP1
GO:0015718_monocarboxylic_acid_transport	16	6.25	4.28	0.219623	0.793539	SLC16A6
GO:0016579_protein_deubiquitination	262	2.29	1.51	0.217332	0.793539	TNFAIP3;NFKBIA;BIRC3;USP21;MDM2;BIRC2
GO:0030214_hyaluronan_catabolic_process	16	6.25	4.28	0.219623	0.793539	HYAL2
GO:0030490_maturation_of_SSU-rRNA	16	6.25	4.28	0.219623	0.793539	RIOK2
GO:0042176_regulation_of_protein_catabolic_process	16	6.25	4.28	0.219623	0.793539	MDM2
GO:0042472_inner_ear_morphogenesis	57	3.51	2.34	0.218469	0.793539	PRRX1;COL11A1
GO:0043149_stress_fiber_assembly	16	6.25	4.28	0.219623	0.793539	SRF
GO:0043508_negative_regulation_of_JUN_kinase_activity	16	6.25	4.28	0.219623	0.793539	DNAJA1
GO:0043968_histone_H2A_acetylation	16	6.25	4.28	0.219623	0.793539	NAA40
GO:0045824_negative_regulation_of_innate_immune_response	16	6.25	4.28	0.219623	0.793539	TNFAIP3
GO:0045987_positive_regulation_of_smooth_muscle_contraction	16	6.25	4.28	0.219623	0.793539	SRF
GO:0046426_negative_regulation_of_receptor_signaling_pathway_via_JAK-STAT	16	6.25	4.28	0.219623	0.793539	SOCS2
GO:0048490_anterograde_synaptic_vesicle_transport	16	6.25	4.28	0.219623	0.793539	TRIM46
GO:0048566_embryonic_digestive_tract_development	16	6.25	4.28	0.219623	0.793539	CXCL8
GO:0048738_cardiac_muscle_tissue_development	16	6.25	4.28	0.219623	0.793539	BMP7
GO:0060548_negative_regulation_of_cell_death	57	3.51	2.34	0.218469	0.793539	HSPA1A;BMP7
GO:0070593_dendrite_self-avoidance	16	6.25	4.28	0.219623	0.793539	IGSF9
GO:0071391_cellular_response_to_estrogen_stimulus	16	6.25	4.28	0.219623	0.793539	MDM2
GO:0071560_cellular_response_to_transforming_growth_factor_beta_stimulus	57	3.51	2.34	0.218469	0.793539	PDE2A;HYAL2
GO:1901800_positive_regulation_of_proteasomal_protein_catabolic_process	16	6.25	4.28	0.219623	0.793539	OSBPL7
GO:1903427_negative_regulation_of_reactive_oxygen_species_biosynthetic_process	16	6.25	4.28	0.219623	0.793539	HSPD1
GO:0001709_cell_fate_determination	17	5.88	4.01	0.231629	0.804881	PAX6
GO:0002063_chondrocyte_development	17	5.88	4.01	0.231629	0.804881	COL11A1
GO:0007340_acrosome_reaction	17	5.88	4.01	0.231629	0.804881	ADCY3
GO:0008340_determination_of_adult_lifespan	17	5.88	4.01	0.231629	0.804881	RAD54L
GO:0015918_sterol_transport	17	5.88	4.01	0.231629	0.804881	OSBPL7
GO:0030517_negative_regulation_of_axon_extension	17	5.88	4.01	0.231629	0.804881	TRIM46
GO:0031124_mRNA_3'-end_processing	59	3.39	2.25	0.229806	0.804881	CPSF4;U2AF2
GO:0031293_membrane_protein_intracellular_domain_proteolysis	17	5.88	4.01	0.231629	0.804881	RELA
GO:0032259_methylation	59	3.39	2.25	0.229806	0.804881	SMYD5;SMYD4
GO:0032609_interferon-gamma_production	17	5.88	4.01	0.231629	0.804881	F2RL1
GO:0034142_toll-like_receptor_4_signaling_pathway	17	5.88	4.01	0.231629	0.804881	NFKBIA
GO:0035855_megakaryocyte_development	17	5.88	4.01	0.231629	0.804881	SRF
GO:0044030_regulation_of_DNA_methylation	17	5.88	4.01	0.231629	0.804881	MBD1
GO:0045333_cellular_respiration	17	5.88	4.01	0.231629	0.804881	NR4A3
GO:0045717_negative_regulation_of_fatty_acid_biosynthetic_process	17	5.88	4.01	0.231629	0.804881	ACADVL
GO:0045926_negative_regulation_of_growth	17	5.88	4.01	0.231629	0.804881	ING5
GO:0048245_eosinophil_chemotaxis	17	5.88	4.01	0.231629	0.804881	CCL2
GO:0048265_response_to_pain	17	5.88	4.01	0.231629	0.804881	EDNRB
GO:0050679_positive_regulation_of_epithelial_cell_proliferation	59	3.39	2.25	0.229806	0.804881	NR4A3;BMPR1A
GO:0050921_positive_regulation_of_chemotaxis	17	5.88	4.01	0.231629	0.804881	F2RL1
GO:0051092_positive_regulation_of_NF-kappaB_transcription_factor_activity	159	2.52	1.66	0.229371	0.804881	ICAM1;HSPA1A;NFKB2;RELA
GO:0051298_centrosome_duplication	17	5.88	4.01	0.231629	0.804881	CHORDC1
GO:0060122_inner_ear_receptor_cell_stereocilium_organization	17	5.88	4.01	0.231629	0.804881	HES5
GO:0060236_regulation_of_mitotic_spindle_organization	17	5.88	4.01	0.231629	0.804881	TACC3
GO:0060252_positive_regulation_of_glial_cell_proliferation	17	5.88	4.01	0.231629	0.804881	E2F1
GO:0060292_long-term_synaptic_depression	17	5.88	4.01	0.231629	0.804881	SRF
GO:0070830_bicellular_tight_junction_assembly	58	3.45	2.29	0.224132	0.804881	CLDN15;SRF
GO:0090280_positive_regulation_of_calcium_ion_import	17	5.88	4.01	0.231629	0.804881	CCL2
GO:0090336_positive_regulation_of_brown_fat_cell_differentiation	17	5.88	4.01	0.231629	0.804881	BMP7
GO:1902041_regulation_of_extrinsic_apoptotic_signaling_pathway_via_death_domain_receptors	17	5.88	4.01	0.231629	0.804881	FEM1B
GO:1902358_sulfate_transmembrane_transport	17	5.88	4.01	0.231629	0.804881	SLC26A6
GO:1904263_positive_regulation_of_TORC1_signaling	17	5.88	4.01	0.231629	0.804881	KLHL22
GO:0000209_protein_polyubiquitination	270	2.22	1.46	0.237141	0.811033	RNF19A;MDM2;PPIL2;BIRC2;UBE2NL;UBE2J1
GO:0001764_neuron_migration	110	2.73	1.8	0.239648	0.811033	TRIM46;SRF;PAX6
GO:0002009_morphogenesis_of_an_epithelium	18	5.56	3.77	0.24345	0.811033	CA2
GO:0006622_protein_targeting_to_lysosome	18	5.56	3.77	0.24345	0.811033	SCARB2
GO:0006839_mitochondrial_transport	18	5.56	3.77	0.24345	0.811033	HSP90AA1
GO:0006998_nuclear_envelope_organization	18	5.56	3.77	0.24345	0.811033	LEMD2
GO:0007219_Notch_signaling_pathway	110	2.73	1.8	0.239648	0.811033	CNTN1;HES5;DTX3
GO:0008156_negative_regulation_of_DNA_replication	18	5.56	3.77	0.24345	0.811033	CDAN1
GO:0010039_response_to_iron_ion	18	5.56	3.77	0.24345	0.811033	MDM2
GO:0010259_multicellular_organism_aging	18	5.56	3.77	0.24345	0.811033	HYAL2
GO:0010812_negative_regulation_of_cell-substrate_adhesion	18	5.56	3.77	0.24345	0.811033	CORO2B
GO:0016486_peptide_hormone_processing	18	5.56	3.77	0.24345	0.811033	PCSK7
GO:0016571_histone_methylation	18	5.56	3.77	0.24345	0.811033	PRMT7
GO:0017158_regulation_of_calcium_ion-dependent_exocytosis	18	5.56	3.77	0.24345	0.811033	SYT4
GO:0021537_telencephalon_development	18	5.56	3.77	0.24345	0.811033	HES5
GO:0021772_olfactory_bulb_development	18	5.56	3.77	0.24345	0.811033	ID2
GO:0030902_hindbrain_development	18	5.56	3.77	0.24345	0.811033	BMP7
GO:0033198_response_to_ATP	18	5.56	3.77	0.24345	0.811033	HSPD1
GO:0033365_protein_localization_to_organelle	18	5.56	3.77	0.24345	0.811033	PAX6
GO:0034199_activation_of_protein_kinase_A_activity	18	5.56	3.77	0.24345	0.811033	ADCY3
GO:0035162_embryonic_hemopoiesis	18	5.56	3.77	0.24345	0.811033	CCDC134
GO:0038095_Fc-epsilon_receptor_signaling_pathway	110	2.73	1.8	0.239648	0.811033	NFATC2;RELA;PIK3CB
GO:0042274_ribosomal_small_subunit_biogenesis	18	5.56	3.77	0.24345	0.811033	RIOK2
GO:0042462_eye_photoreceptor_cell_development	18	5.56	3.77	0.24345	0.811033	PAX6
GO:0043011_myeloid_dendritic_cell_differentiation	18	5.56	3.77	0.24345	0.811033	RELB
GO:0043032_positive_regulation_of_macrophage_activation	18	5.56	3.77	0.24345	0.811033	HSPD1
GO:0043627_response_to_estrogen	61	3.28	2.18	0.24118	0.811033	CA2;HSPD1
GO:0045445_myoblast_differentiation	18	5.56	3.77	0.24345	0.811033	MAPK12
GO:0045638_negative_regulation_of_myeloid_cell_differentiation	18	5.56	3.77	0.24345	0.811033	NFKBIA
GO:0046847_filopodium_assembly	18	5.56	3.77	0.24345	0.811033	FGD3
GO:0048557_embryonic_digestive_tract_morphogenesis	18	5.56	3.77	0.24345	0.811033	ID2
GO:0051384_response_to_glucocorticoid	60	3.33	2.21	0.235489	0.811033	ACSBG1;HSPD1
GO:0060037_pharyngeal_system_development	18	5.56	3.77	0.24345	0.811033	BMP7
GO:0060997_dendritic_spine_morphogenesis	18	5.56	3.77	0.24345	0.811033	EPHB3
GO:0090630_activation_of_GTPase_activity	109	2.75	1.82	0.235566	0.811033	SGSM1;ARHGAP42;SGSM2
GO:2000042_negative_regulation_of_double-strand_break_repair_via_homologous_recombination	18	5.56	3.77	0.24345	0.811033	UBQLN4
GO:0001570_vasculogenesis	62	3.23	2.14	0.246878	0.818698	HAS2;HDAC7
GO:0048812_neuron_projection_morphogenesis	62	3.23	2.14	0.246878	0.818698	BMP7;ILK
GO:0050680_negative_regulation_of_epithelial_cell_proliferation	62	3.23	2.14	0.246878	0.818698	IFT57;PAX6
GO:0051965_positive_regulation_of_synapse_assembly	62	3.23	2.14	0.246878	0.818698	EPHB3;LRRN3
GO:0002223_stimulatory_C-type_lectin_receptor_signaling_pathway	112	2.68	1.77	0.247847	0.820977	RELB;RAF1;RELA
GO:0001510_RNA_methylation	19	5.26	3.56	0.255089	0.824287	NSUN5P2
GO:0001947_heart_looping	63	3.17	2.1	0.25258	0.824287	SRF;IFT57
GO:0006886_intracellular_protein_transport	277	2.17	1.42	0.254908	0.824287	GGA1;GGA3;SGSM1;STX1A;SGSM2;SEC24D
GO:0008585_female_gonad_development	19	5.26	3.56	0.255089	0.824287	FANCA
GO:0010821_regulation_of_mitochondrion_organization	19	5.26	3.56	0.255089	0.824287	PDE2A
GO:0014911_positive_regulation_of_smooth_muscle_cell_migration	19	5.26	3.56	0.255089	0.824287	HAS2
GO:0021522_spinal_cord_motor_neuron_differentiation	19	5.26	3.56	0.255089	0.824287	GDPD5
GO:0032332_positive_regulation_of_chondrocyte_differentiation	19	5.26	3.56	0.255089	0.824287	RELA
GO:0032793_positive_regulation_of_CREB_transcription_factor_activity	19	5.26	3.56	0.255089	0.824287	CRTC2
GO:0032930_positive_regulation_of_superoxide_anion_generation	19	5.26	3.56	0.255089	0.824287	F2RL1
GO:0035269_protein_O-linked_mannosylation	19	5.26	3.56	0.255089	0.824287	POMT1
GO:0035338_long-chain_fatty-acyl-CoA_biosynthetic_process	19	5.26	3.56	0.255089	0.824287	ACSBG1
GO:0043488_regulation_of_mRNA_stability	113	2.65	1.75	0.251963	0.824287	HSPA1A;HSPA8;FXR1
GO:0045780_positive_regulation_of_bone_resorption	19	5.26	3.56	0.255089	0.824287	CA2
GO:0046655_folic_acid_metabolic_process	19	5.26	3.56	0.255089	0.824287	MTHFR
GO:0048821_erythrocyte_development	19	5.26	3.56	0.255089	0.824287	SRF
GO:0051604_protein_maturation	19	5.26	3.56	0.255089	0.824287	HSPD1
GO:0070102_interleukin-6-mediated_signaling_pathway	19	5.26	3.56	0.255089	0.824287	IL6ST
GO:0071375_cellular_response_to_peptide_hormone_stimulus	19	5.26	3.56	0.255089	0.824287	MDM2
GO:0090026_positive_regulation_of_monocyte_chemotaxis	19	5.26	3.56	0.255089	0.824287	CXCL10
GO:1902236_negative_regulation_of_endoplasmic_reticulum_stress-induced_intrinsic_apoptotic_signaling_pathway	19	5.26	3.56	0.255089	0.824287	HSPA1A
GO:2000377_regulation_of_reactive_oxygen_species_metabolic_process	19	5.26	3.56	0.255089	0.824287	BIRC2
GO:0010976_positive_regulation_of_neuron_projection_development	114	2.63	1.74	0.256089	0.826599	CNTN1;SCARB2;NCKIPSD
GO:0051898_negative_regulation_of_protein_kinase_B_signaling	64	3.12	2.07	0.258285	0.831837	LEMD2;HYAL2
GO:2000134_negative_regulation_of_G1/S_transition_of_mitotic_cell_cycle	64	3.12	2.07	0.258285	0.831837	CCL2;CDK4
GO:0006913_nucleocytoplasmic_transport	20	5	3.38	0.26655	0.834406	AAAS
GO:0007004_telomere_maintenance_via_telomerase	20	5	3.38	0.26655	0.834406	HSP90AA1
GO:0007041_lysosomal_transport	20	5	3.38	0.26655	0.834406	HSPA1A
GO:0007338_single_fertilization	65	3.08	2.04	0.263991	0.834406	ADCY3;SPAG1
GO:0007413_axonal_fasciculation	20	5	3.38	0.26655	0.834406	EPHB3
GO:0010875_positive_regulation_of_cholesterol_efflux	20	5	3.38	0.26655	0.834406	NFKBIA
GO:0016226_iron-sulfur_cluster_assembly	20	5	3.38	0.26655	0.834406	MMS19
GO:0023019_signal_transduction_involved_in_regulation_of_gene_expression	20	5	3.38	0.26655	0.834406	PAX6
GO:0030500_regulation_of_bone_mineralization	20	5	3.38	0.26655	0.834406	DDR2
GO:0030837_negative_regulation_of_actin_filament_polymerization	20	5	3.38	0.26655	0.834406	HIP1R
GO:0032727_positive_regulation_of_interferon-alpha_production	20	5	3.38	0.26655	0.834406	HSPD1
GO:0032729_positive_regulation_of_interferon-gamma_production	65	3.08	2.04	0.263991	0.834406	CD276;HSPD1
GO:0034063_stress_granule_assembly	20	5	3.38	0.26655	0.834406	DDX6
GO:0042311_vasodilation	20	5	3.38	0.26655	0.834406	EDNRB
GO:0042474_middle_ear_morphogenesis	20	5	3.38	0.26655	0.834406	PRRX1
GO:0043046_DNA_methylation_involved_in_gamete_generation	20	5	3.38	0.26655	0.834406	PRMT7
GO:0045197_establishment_or_maintenance_of_epithelial_cell_apical/basal_polarity	20	5	3.38	0.26655	0.834406	ILK
GO:0045777_positive_regulation_of_blood_pressure	20	5	3.38	0.26655	0.834406	ID2
GO:0045862_positive_regulation_of_proteolysis	20	5	3.38	0.26655	0.834406	PLK1
GO:0048011_neurotrophin_TRK_receptor_signaling_pathway	20	5	3.38	0.26655	0.834406	RAF1
GO:0060261_positive_regulation_of_transcription_initiation_from_RNA_polymerase_II_promoter	20	5	3.38	0.26655	0.834406	SRF
GO:0061001_regulation_of_dendritic_spine_morphogenesis	20	5	3.38	0.26655	0.834406	ARHGAP44
GO:0070266_necroptotic_process	20	5	3.38	0.26655	0.834406	BIRC2
GO:0072657_protein_localization_to_membrane	20	5	3.38	0.26655	0.834406	STX1A
GO:1901741_positive_regulation_of_myoblast_fusion	20	5	3.38	0.26655	0.834406	NFATC2
GO:1902004_positive_regulation_of_amyloid-beta_formation	20	5	3.38	0.26655	0.834406	RELA
GO:0001502_cartilage_condensation	21	4.76	3.21	0.277835	0.840741	COL11A1
GO:0002042_cell_migration_involved_in_sprouting_angiogenesis	21	4.76	3.21	0.277835	0.840741	SRF
GO:0002244_hematopoietic_progenitor_cell_differentiation	66	3.03	2.01	0.269698	0.840741	SSBP3;HYAL2
GO:0006303_double-strand_break_repair_via_nonhomologous_end_joining	66	3.03	2.01	0.269698	0.840741	XRCC1;POLM
GO:0007030_Golgi_organization	118	2.54	1.68	0.272679	0.840741	TJAP1;TANGO2;VMP1
GO:0007095_mitotic_G2_DNA_damage_checkpoint	21	4.76	3.21	0.277835	0.840741	MRNIP
GO:0007130_synaptonemal_complex_assembly	21	4.76	3.21	0.277835	0.840741	REC8
GO:0007342_fusion_of_sperm_to_egg_plasma_membrane_involved_in_single_fertilization	21	4.76	3.21	0.277835	0.840741	SPACA6
GO:0009235_cobalamin_metabolic_process	21	4.76	3.21	0.277835	0.840741	ABCD4
GO:0009311_oligosaccharide_metabolic_process	21	4.76	3.21	0.277835	0.840741	MAN1B1
GO:0010801_negative_regulation_of_peptidyl-threonine_phosphorylation	21	4.76	3.21	0.277835	0.840741	SIRT2
GO:0016338_calcium-independent_cell-cell_adhesion_via_plasma_membrane_cell-adhesion_molecules	21	4.76	3.21	0.277835	0.840741	CLDN15
GO:0016540_protein_autoprocessing	21	4.76	3.21	0.277835	0.840741	PISD
GO:0019882_antigen_processing_and_presentation	21	4.76	3.21	0.277835	0.840741	RELB
GO:0030317_flagellated_sperm_motility	67	2.99	1.98	0.275404	0.840741	GAS8;ADCY3
GO:0030318_melanocyte_differentiation	21	4.76	3.21	0.277835	0.840741	EDNRB
GO:0032868_response_to_insulin	67	2.99	1.98	0.275404	0.840741	ICAM1;RELA
GO:0033627_cell_adhesion_mediated_by_integrin	21	4.76	3.21	0.277835	0.840741	ICAM1
GO:0035082_axoneme_assembly	21	4.76	3.21	0.277835	0.840741	GAS8
GO:0035567_non-canonical_Wnt_signaling_pathway	21	4.76	3.21	0.277835	0.840741	DVL2
GO:0045104_intermediate_filament_cytoskeleton_organization	21	4.76	3.21	0.277835	0.840741	RAF1
GO:0046716_muscle_cell_cellular_homeostasis	21	4.76	3.21	0.277835	0.840741	SRF
GO:0048278_vesicle_docking	21	4.76	3.21	0.277835	0.840741	STX1A
GO:0050770_regulation_of_axonogenesis	21	4.76	3.21	0.277835	0.840741	EPHB3
GO:0050771_negative_regulation_of_axonogenesis	21	4.76	3.21	0.277835	0.840741	THY1
GO:0050775_positive_regulation_of_dendrite_morphogenesis	21	4.76	3.21	0.277835	0.840741	ILK
GO:0050999_regulation_of_nitric-oxide_synthase_activity	21	4.76	3.21	0.277835	0.840741	HSP90AA1
GO:0051568_histone_H3-K4_methylation	21	4.76	3.21	0.277835	0.840741	CXXC1
GO:0071397_cellular_response_to_cholesterol	21	4.76	3.21	0.277835	0.840741	OSBPL7
GO:0099175_regulation_of_postsynapse_organization	21	4.76	3.21	0.277835	0.840741	HSPA8
GO:1902017_regulation_of_cilium_assembly	21	4.76	3.21	0.277835	0.840741	CNTROB
GO:1904886_beta-catenin_destruction_complex_disassembly	21	4.76	3.21	0.277835	0.840741	DVL2
GO:0006401_RNA_catabolic_process	22	4.55	3.05	0.288947	0.856522	SKIV2L
GO:0006783_heme_biosynthetic_process	22	4.55	3.05	0.288947	0.856522	SLC25A39
GO:0009416_response_to_light_stimulus	22	4.55	3.05	0.288947	0.856522	POLG
GO:0030879_mammary_gland_development	22	4.55	3.05	0.288947	0.856522	PYGO2
GO:0035024_negative_regulation_of_Rho_protein_signal_transduction	22	4.55	3.05	0.288947	0.856522	ARHGAP42
GO:0035904_aorta_development	22	4.55	3.05	0.288947	0.856522	PDE2A
GO:0035970_peptidyl-threonine_dephosphorylation	22	4.55	3.05	0.288947	0.856522	PPP5C
GO:0036120_cellular_response_to_platelet-derived_growth_factor_stimulus	22	4.55	3.05	0.288947	0.856522	HAS2
GO:0042098_T_cell_proliferation	22	4.55	3.05	0.288947	0.856522	LMBR1L
GO:0045022_early_endosome_to_late_endosome_transport	22	4.55	3.05	0.288947	0.856522	WDR91
GO:0045663_positive_regulation_of_myoblast_differentiation	22	4.55	3.05	0.288947	0.856522	ILK
GO:0045954_positive_regulation_of_natural_killer_cell_mediated_cytotoxicity	22	4.55	3.05	0.288947	0.856522	STAT5B
GO:0046835_carbohydrate_phosphorylation	22	4.55	3.05	0.288947	0.856522	NAGK
GO:0048260_positive_regulation_of_receptor-mediated_endocytosis	22	4.55	3.05	0.288947	0.856522	HIP1R
GO:0048754_branching_morphogenesis_of_an_epithelial_tube	22	4.55	3.05	0.288947	0.856522	BMP7
GO:0051899_membrane_depolarization	22	4.55	3.05	0.288947	0.856522	CACNB3
GO:0061640_cytoskeleton-dependent_cytokinesis	22	4.55	3.05	0.288947	0.856522	SEPT5
GO:0070423_nucleotide-binding_oligomerization_domain_containing_signaling_pathway	22	4.55	3.05	0.288947	0.856522	TNFAIP3
GO:1903861_positive_regulation_of_dendrite_extension	22	4.55	3.05	0.288947	0.856522	SYT4
GO:2000378_negative_regulation_of_reactive_oxygen_species_metabolic_process	22	4.55	3.05	0.288947	0.856522	SIRT2
GO:0000715_nucleotide-excision_repair,_DNA_damage_recognition	23	4.35	2.92	0.299889	0.86598	COPS7B
GO:0002052_positive_regulation_of_neuroblast_proliferation	23	4.35	2.92	0.299889	0.86598	PAX6
GO:0002092_positive_regulation_of_receptor_internalization	23	4.35	2.92	0.299889	0.86598	SELE
GO:0006471_protein_ADP-ribosylation	23	4.35	2.92	0.299889	0.86598	SIRT2
GO:0006997_nucleus_organization	23	4.35	2.92	0.299889	0.86598	BIN1
GO:0007369_gastrulation	23	4.35	2.92	0.299889	0.86598	NR4A3
GO:0008643_carbohydrate_transport	23	4.35	2.92	0.299889	0.86598	SLC35A4
GO:0016241_regulation_of_macroautophagy	71	2.82	1.86	0.298191	0.86598	EXOC7;UBQLN1
GO:0018230_peptidyl-L-cysteine_S-palmitoylation	23	4.35	2.92	0.299889	0.86598	ZDHHC22
GO:0030111_regulation_of_Wnt_signaling_pathway	23	4.35	2.92	0.299889	0.86598	RSPO3
GO:0042531_positive_regulation_of_tyrosine_phosphorylation_of_STAT_protein	71	2.82	1.86	0.298191	0.86598	IL6ST;HES5
GO:0044458_motile_cilium_assembly	23	4.35	2.92	0.299889	0.86598	IFT57
GO:0045672_positive_regulation_of_osteoclast_differentiation	23	4.35	2.92	0.299889	0.86598	CA2
GO:0045742_positive_regulation_of_epidermal_growth_factor_receptor_signaling_pathway	23	4.35	2.92	0.299889	0.86598	HIP1R
GO:0045921_positive_regulation_of_exocytosis	23	4.35	2.92	0.299889	0.86598	PLA2G6
GO:0048240_sperm_capacitation	23	4.35	2.92	0.299889	0.86598	SLC26A6
GO:0048844_artery_morphogenesis	23	4.35	2.92	0.299889	0.86598	PRRX1
GO:0050860_negative_regulation_of_T_cell_receptor_signaling_pathway	23	4.35	2.92	0.299889	0.86598	THY1
GO:0051893_regulation_of_focal_adhesion_assembly	23	4.35	2.92	0.299889	0.86598	SLK
GO:0051897_positive_regulation_of_protein_kinase_B_signaling	178	2.25	1.48	0.293354	0.86598	HSP90AA1;ILK;MEIS3;PIK3CB
GO:0060135_maternal_process_involved_in_female_pregnancy	23	4.35	2.92	0.299889	0.86598	PLA2G6
GO:0060333_interferon-gamma-mediated_signaling_pathway	70	2.86	1.89	0.292502	0.86598	VCAM1;ICAM1
GO:0060999_positive_regulation_of_dendritic_spine_development	23	4.35	2.92	0.299889	0.86598	MAPK6
GO:0070509_calcium_ion_import	23	4.35	2.92	0.299889	0.86598	ATP2A1
GO:1900273_positive_regulation_of_long-term_synaptic_potentiation	23	4.35	2.92	0.299889	0.86598	AKAP5
GO:2000773_negative_regulation_of_cellular_senescence	23	4.35	2.92	0.299889	0.86598	NAMPT
GO:0033674_positive_regulation_of_kinase_activity	72	2.78	1.83	0.303872	0.876613	EPHB3;DDR2
GO:0002286_T_cell_activation_involved_in_immune_response	24	4.17	2.79	0.310662	0.883911	F2RL1
GO:0006283_transcription-coupled_nucleotide-excision_repair	73	2.74	1.81	0.309545	0.883911	XRCC1;COPS7B
GO:0007140_male_meiotic_nuclear_division	24	4.17	2.79	0.310662	0.883911	FANCA
GO:0007141_male_meiosis_I	24	4.17	2.79	0.310662	0.883911	REC8
GO:0007265_Ras_protein_signal_transduction	73	2.74	1.81	0.309545	0.883911	DOK3;RASSF1
GO:0009267_cellular_response_to_starvation	73	2.74	1.81	0.309545	0.883911	HSPA8;WDR45
GO:0010804_negative_regulation_of_tumor_necrosis_factor-mediated_signaling_pathway	24	4.17	2.79	0.310662	0.883911	F2RL1
GO:0016079_synaptic_vesicle_exocytosis	24	4.17	2.79	0.310662	0.883911	STX1A
GO:0019915_lipid_storage	24	4.17	2.79	0.310662	0.883911	STAT5B
GO:0032201_telomere_maintenance_via_semi-conservative_replication	24	4.17	2.79	0.310662	0.883911	POLE
GO:0045662_negative_regulation_of_myoblast_differentiation	24	4.17	2.79	0.310662	0.883911	CXCL10
GO:0046628_positive_regulation_of_insulin_receptor_signaling_pathway	24	4.17	2.79	0.310662	0.883911	GKAP1
GO:0072583_clathrin-dependent_endocytosis	24	4.17	2.79	0.310662	0.883911	FCHO1
GO:0090103_cochlea_morphogenesis	24	4.17	2.79	0.310662	0.883911	DVL2
GO:0030183_B_cell_differentiation	74	2.7	1.78	0.315209	0.895971	VCAM1;POLM
GO:0000375_RNA_splicing,_via_transesterification_reactions	25	4	2.67	0.32127	0.905227	SF3B4
GO:0006027_glycosaminoglycan_catabolic_process	25	4	2.67	0.32127	0.905227	HYAL2
GO:0007596_blood_coagulation	186	2.15	1.41	0.321004	0.905227	F2RL1;MICAL1;AKAP1;SH2B1
GO:0043409_negative_regulation_of_MAPK_cascade	25	4	2.67	0.32127	0.905227	LEMD2
GO:0045671_negative_regulation_of_osteoclast_differentiation	25	4	2.67	0.32127	0.905227	PIAS3
GO:0050709_negative_regulation_of_protein_secretion	25	4	2.67	0.32127	0.905227	SYT4
GO:0051894_positive_regulation_of_focal_adhesion_assembly	25	4	2.67	0.32127	0.905227	THY1
GO:0055010_ventricular_cardiac_muscle_tissue_morphogenesis	25	4	2.67	0.32127	0.905227	COL11A1
GO:1903508_positive_regulation_of_nucleic_acid-templated_transcription	75	2.67	1.76	0.320862	0.905227	FUS;BIRC2
GO:0006816_calcium_ion_transport	76	2.63	1.73	0.326504	0.919084	CACNB3;ATP2A1
GO:0006694_steroid_biosynthetic_process	26	3.85	2.57	0.331715	0.919778	LSS
GO:0007422_peripheral_nervous_system_development	26	3.85	2.57	0.331715	0.919778	EDNRB
GO:0010906_regulation_of_glucose_metabolic_process	26	3.85	2.57	0.331715	0.919778	ACACB
GO:0018345_protein_palmitoylation	26	3.85	2.57	0.331715	0.919778	ZDHHC22
GO:0030206_chondroitin_sulfate_biosynthetic_process	26	3.85	2.57	0.331715	0.919778	XYLT2
GO:0030522_intracellular_receptor_signaling_pathway	26	3.85	2.57	0.331715	0.919778	NR4A3
GO:0032091_negative_regulation_of_protein_binding	77	2.6	1.71	0.332133	0.919778	DDX11;AURKB
GO:0036152_phosphatidylethanolamine_acyl-chain_remodeling	26	3.85	2.57	0.331715	0.919778	PLA2G6
GO:0042104_positive_regulation_of_activated_T_cell_proliferation	26	3.85	2.57	0.331715	0.919778	STAT5B
GO:0042147_retrograde_transport,_endosome_to_Golgi	77	2.6	1.71	0.332133	0.919778	GGA1;UBE2O
GO:0042327_positive_regulation_of_phosphorylation	26	3.85	2.57	0.331715	0.919778	ILK
GO:0043113_receptor_clustering	26	3.85	2.57	0.331715	0.919778	THY1
GO:0071377_cellular_response_to_glucagon_stimulus	26	3.85	2.57	0.331715	0.919778	ADCY3
GO:0071398_cellular_response_to_fatty_acid	26	3.85	2.57	0.331715	0.919778	E2F1
GO:0090023_positive_regulation_of_neutrophil_chemotaxis	26	3.85	2.57	0.331715	0.919778	CXCL8
GO:2001235_positive_regulation_of_apoptotic_signaling_pathway	26	3.85	2.57	0.331715	0.919778	ING5
GO:2001238_positive_regulation_of_extrinsic_apoptotic_signaling_pathway	26	3.85	2.57	0.331715	0.919778	HYAL2
GO:0001954_positive_regulation_of_cell-matrix_adhesion	27	3.7	2.47	0.342	0.93639	ILK
GO:0002474_antigen_processing_and_presentation_of_peptide_antigen_via_MHC_class_I	27	3.7	2.47	0.342	0.93639	SEC24D
GO:0003148_outflow_tract_septum_morphogenesis	27	3.7	2.47	0.342	0.93639	BMPR1A
GO:0005977_glycogen_metabolic_process	27	3.7	2.47	0.342	0.93639	IL6ST
GO:0008306_associative_learning	27	3.7	2.47	0.342	0.93639	SRF
GO:0009966_regulation_of_signal_transduction	27	3.7	2.47	0.342	0.93639	SOCS2
GO:0015949_nucleobase-containing_small_molecule_interconversion	27	3.7	2.47	0.342	0.93639	RRM2B
GO:0031214_biomineral_tissue_development	27	3.7	2.47	0.342	0.93639	DDR2
GO:0045879_negative_regulation_of_smoothened_signaling_pathway	27	3.7	2.47	0.342	0.93639	ULK3
GO:0060349_bone_morphogenesis	27	3.7	2.47	0.342	0.93639	HAS2
GO:0071158_positive_regulation_of_cell_cycle_arrest	27	3.7	2.47	0.342	0.93639	ID2
GO:2000353_positive_regulation_of_endothelial_cell_apoptotic_process	27	3.7	2.47	0.342	0.93639	CCL2
GO:0017148_negative_regulation_of_translation	79	2.53	1.67	0.34335	0.938319	ILF3;FXR1
GO:0070373_negative_regulation_of_ERK1_and_ERK2_cascade	79	2.53	1.67	0.34335	0.938319	ATF3;VRK3
GO:0000387_spliceosomal_snRNP_assembly	28	3.57	2.38	0.352127	0.947156	PRMT7
GO:0006298_mismatch_repair	28	3.57	2.38	0.352127	0.947156	MUTYH
GO:0006446_regulation_of_translational_initiation	28	3.57	2.38	0.352127	0.947156	MTIF2
GO:0006479_protein_methylation	28	3.57	2.38	0.352127	0.947156	METTL22
GO:0006836_neurotransmitter_transport	28	3.57	2.38	0.352127	0.947156	SLC29A2
GO:0007205_protein_kinase_C-activating_G_protein-coupled_receptor_signaling_pathway	28	3.57	2.38	0.352127	0.947156	AZU1
GO:0010575_positive_regulation_of_vascular_endothelial_growth_factor_production	28	3.57	2.38	0.352127	0.947156	IL6ST
GO:0032418_lysosome_localization	28	3.57	2.38	0.352127	0.947156	KXD1
GO:0035556_intracellular_signal_transduction	372	1.88	1.23	0.348047	0.947156	PASK;STK32A;CXCL8;SH2B1;MAPK12;SOCS2;MAPK6
GO:0042073_intraciliary_transport	28	3.57	2.38	0.352127	0.947156	IFT57
GO:0043029_T_cell_homeostasis	28	3.57	2.38	0.352127	0.947156	STAT5B
GO:0045840_positive_regulation_of_mitotic_nuclear_division	28	3.57	2.38	0.352127	0.947156	SH2B1
GO:0046330_positive_regulation_of_JNK_cascade	80	2.5	1.65	0.348937	0.947156	F2RL1;PJA2
GO:0061077_chaperone-mediated_protein_folding	28	3.57	2.38	0.352127	0.947156	CHORDC1
GO:0090200_positive_regulation_of_release_of_cytochrome_c_from_mitochondria	28	3.57	2.38	0.352127	0.947156	PLA2G6
GO:0097352_autophagosome_maturation	28	3.57	2.38	0.352127	0.947156	UBQLN1
GO:1905563_negative_regulation_of_vascular_endothelial_cell_proliferation	28	3.57	2.38	0.352127	0.947156	CCL2
GO:0060964_regulation_of_gene_silencing_by_miRNA	81	2.47	1.62	0.354507	0.952675	AAAS;NUP210
GO:0006362_transcription_elongation_from_RNA_polymerase_I_promoter	29	3.45	2.29	0.362098	0.958883	TAF1C
GO:0007417_central_nervous_system_development	139	2.16	1.42	0.360745	0.958883	NHLH1;GBA2;PAX6
GO:0014059_regulation_of_dopamine_secretion	29	3.45	2.29	0.362098	0.958883	SYT4
GO:0019933_cAMP-mediated_signaling	29	3.45	2.29	0.362098	0.958883	PDE2A
GO:0021915_neural_tube_development	29	3.45	2.29	0.362098	0.958883	HES5
GO:0036151_phosphatidylcholine_acyl-chain_remodeling	29	3.45	2.29	0.362098	0.958883	PLA2G6
GO:0043122_regulation_of_I-kappaB_kinase/NF-kappaB_signaling	29	3.45	2.29	0.362098	0.958883	F2RL1
GO:0043153_entrainment_of_circadian_clock_by_photoperiod	29	3.45	2.29	0.362098	0.958883	ID2
GO:0046329_negative_regulation_of_JNK_cascade	29	3.45	2.29	0.362098	0.958883	F2RL1
GO:0050769_positive_regulation_of_neurogenesis	29	3.45	2.29	0.362098	0.958883	SRRT
GO:0051930_regulation_of_sensory_perception_of_pain	29	3.45	2.29	0.362098	0.958883	EDNRB
GO:0051968_positive_regulation_of_synaptic_transmission,_glutamatergic	29	3.45	2.29	0.362098	0.958883	CCL2
GO:0071277_cellular_response_to_calcium_ion	82	2.44	1.6	0.36006	0.958883	FUS;SYT4
GO:1904837_beta-catenin-TCF_complex_assembly	29	3.45	2.29	0.362098	0.958883	PYGO2
GO:2000145_regulation_of_cell_motility	29	3.45	2.29	0.362098	0.958883	RAF1
GO:2001234_negative_regulation_of_apoptotic_signaling_pathway	29	3.45	2.29	0.362098	0.958883	MEIS3
GO:0007613_memory	83	2.41	1.58	0.365595	0.966382	PLA2G6;SYT4
GO:0031145_anaphase-promoting_complex-dependent_catabolic_process	83	2.41	1.58	0.365595	0.966382	PLK1;AURKB
GO:0000165_MAPK_cascade	260	1.92	1.26	0.370641	0.970725	CCL2;PPP5C;MAPK12;RAF1;MAPK6
GO:0006363_termination_of_RNA_polymerase_I_transcription	30	3.33	2.21	0.371916	0.970725	TAF1C
GO:0006629_lipid_metabolic_process	141	2.13	1.4	0.369109	0.970725	GDPD5;NAA40;PLCXD1
GO:0007585_respiratory_gaseous_exchange_by_respiratory_system	30	3.33	2.21	0.371916	0.970725	EDNRA
GO:0007586_digestion	30	3.33	2.21	0.371916	0.970725	CYP39A1
GO:0010629_negative_regulation_of_gene_expression	260	1.92	1.26	0.370641	0.970725	ACACB;CXCL8;ID2;DIP2A;MYCN
GO:0018279_protein_N-linked_glycosylation_via_asparagine	30	3.33	2.21	0.371916	0.970725	UBE2J1
GO:0030509_BMP_signaling_pathway	84	2.38	1.56	0.371112	0.970725	BMP7;BMPR1A
GO:0043388_positive_regulation_of_DNA_binding	30	3.33	2.21	0.371916	0.970725	SIRT2
GO:0043542_endothelial_cell_migration	30	3.33	2.21	0.371916	0.970725	PXN
GO:0046427_positive_regulation_of_receptor_signaling_pathway_via_JAK-STAT	30	3.33	2.21	0.371916	0.970725	HES5
GO:0051491_positive_regulation_of_filopodium_assembly	30	3.33	2.21	0.371916	0.970725	SRF
GO:0071480_cellular_response_to_gamma_radiation	30	3.33	2.21	0.371916	0.970725	MDM2
GO:0090314_positive_regulation_of_protein_targeting_to_membrane	30	3.33	2.21	0.371916	0.970725	CACNB3
GO:0007565_female_pregnancy	85	2.35	1.55	0.37661	0.982093	NAMPT;STAT5B
GO:0002040_sprouting_angiogenesis	31	3.23	2.14	0.381584	0.982714	RSPO3
GO:0007093_mitotic_cell_cycle_checkpoint	31	3.23	2.14	0.381584	0.982714	INTS3
GO:0008089_anterograde_axonal_transport	31	3.23	2.14	0.381584	0.982714	SPG7
GO:0010043_response_to_zinc_ion	31	3.23	2.14	0.381584	0.982714	CA2
GO:0017157_regulation_of_exocytosis	31	3.23	2.14	0.381584	0.982714	SEPT5
GO:0032543_mitochondrial_translation	31	3.23	2.14	0.381584	0.982714	MRPS2
GO:0033574_response_to_testosterone	31	3.23	2.14	0.381584	0.982714	CDK4
GO:0038128_ERBB2_signaling_pathway	31	3.23	2.14	0.381584	0.982714	HSP90AA1
GO:0045907_positive_regulation_of_vasoconstriction	31	3.23	2.14	0.381584	0.982714	ICAM1
GO:0051497_negative_regulation_of_stress_fiber_assembly	31	3.23	2.14	0.381584	0.982714	CORO2B
GO:0070536_protein_K63-linked_deubiquitination	31	3.23	2.14	0.381584	0.982714	TNFAIP3
GO:0071549_cellular_response_to_dexamethasone_stimulus	31	3.23	2.14	0.381584	0.982714	ICAM1
GO:1900745_positive_regulation_of_p38MAPK_cascade	31	3.23	2.14	0.381584	0.982714	PJA2
GO:1903671_negative_regulation_of_sprouting_angiogenesis	31	3.23	2.14	0.381584	0.982714	E2F2
GO:0050731_positive_regulation_of_peptidyl-tyrosine_phosphorylation	86	2.33	1.53	0.382088	0.983139	ICAM1;CNTN1
GO:0002027_regulation_of_heart_rate	32	3.12	2.07	0.391103	0.995753	MDM2
GO:0002755_MyD88-dependent_toll-like_receptor_signaling_pathway	32	3.12	2.07	0.391103	0.995753	HSPD1
GO:0003333_amino_acid_transmembrane_transport	32	3.12	2.07	0.391103	0.995753	SLC7A11
GO:0007528_neuromuscular_junction_development	32	3.12	2.07	0.391103	0.995753	CACNB3
GO:0032480_negative_regulation_of_type_I_interferon_production	32	3.12	2.07	0.391103	0.995753	TNFAIP3
GO:0035094_response_to_nicotine	32	3.12	2.07	0.391103	0.995753	SLC7A11
GO:0042407_cristae_formation	32	3.12	2.07	0.391103	0.995753	SPG7
GO:0043330_response_to_exogenous_dsRNA	32	3.12	2.07	0.391103	0.995753	NFKBIA
GO:0045815_positive_regulation_of_gene_expression,_epigenetic	32	3.12	2.07	0.391103	0.995753	TAF1C
GO:0046513_ceramide_biosynthetic_process	32	3.12	2.07	0.391103	0.995753	SMPD4
GO:0048701_embryonic_cranial_skeleton_morphogenesis	32	3.12	2.07	0.391103	0.995753	PRRX1
GO:0090102_cochlea_development	32	3.12	2.07	0.391103	0.995753	MCM2
GO:0014068_positive_regulation_of_phosphatidylinositol_3-kinase_signaling	88	2.27	1.49	0.39298	0.998782	F2RL1;PIK3CB
GO:0070125_mitochondrial_translational_elongation	88	2.27	1.49	0.39298	0.998782	MRPS2;MRPL50
GO:0000002_mitochondrial_genome_maintenance	12	0	0	1	1
GO:0000027_ribosomal_large_subunit_assembly	25	0	0	1	1
GO:0000028_ribosomal_small_subunit_assembly	16	0	0	1	1
GO:0000050_urea_cycle	11	0	0	1	1
GO:0000183_rDNA_heterochromatin_assembly	37	2.7	1.78	0.43655	1	SIRT2
GO:0000184_nuclear-transcribed_mRNA_catabolic_process,_nonsense-mediated_decay	117	0.85	0.55	0.837454	1	SMG9
GO:0000185_activation_of_MAPKKK_activity	12	0	0	1	1
GO:0000186_activation_of_MAPKK_activity	42	2.38	1.56	0.478612	1	RAF1
GO:0000187_activation_of_MAPK_activity	123	0.81	0.52	0.851946	1	PIK3CB
GO:0000188_inactivation_of_MAPK_activity	25	0	0	1	1
GO:0000244_spliceosomal_tri-snRNP_complex_assembly	27	0	0	1	1
GO:0000245_spliceosomal_complex_assembly	26	0	0	1	1
GO:0000266_mitochondrial_fission	19	0	0	1	1
GO:0000281_mitotic_cytokinesis	52	1.92	1.26	0.553571	1	PLK1
GO:0000288_nuclear-transcribed_mRNA_catabolic_process,_deadenylation-dependent_decay	9	0	0	1	1
GO:0000289_nuclear-transcribed_mRNA_poly(A)_tail_shortening	22	0	0	1	1
GO:0000290_deadenylation-dependent_decapping_of_nuclear-transcribed_mRNA	10	0	0	1	1
GO:0000353_formation_of_quadruple_SL/U4/U5/U6_snRNP	12	0	0	1	1
GO:0000380_alternative_mRNA_splicing,_via_spliceosome	18	0	0	1	1
GO:0000395_mRNA_5'-splice_site_recognition	25	0	0	1	1
GO:0000413_protein_peptidyl-prolyl_isomerization	43	2.33	1.53	0.486641	1	PPIL2
GO:0000423_mitophagy	8	0	0	1	1
GO:0000462_maturation_of_SSU-rRNA_from_tricistronic_rRNA_transcript_(SSU-rRNA,_5.8S_rRNA,_LSU-rRNA)	27	0	0	1	1
GO:0000463_maturation_of_LSU-rRNA_from_tricistronic_rRNA_transcript_(SSU-rRNA,_5.8S_rRNA,_LSU-rRNA)	14	0	0	1	1
GO:0000492_box_C/D_snoRNP_assembly	9	0	0	1	1
GO:0000712_resolution_of_meiotic_recombination_intermediates	18	0	0	1	1
GO:0000717_nucleotide-excision_repair,_DNA_duplex_unwinding	22	0	0	1	1
GO:0000723_telomere_maintenance	44	0	0	1	1
GO:0000729_DNA_double-strand_break_processing	15	0	0	1	1
GO:0000737_DNA_catabolic_process,_endonucleolytic	11	0	0	1	1
GO:0000902_cell_morphogenesis	81	0	0	1	1
GO:0001501_skeletal_system_development	136	0.74	0.47	0.879075	1	BMP7
GO:0001508_action_potential	18	0	0	1	1
GO:0001516_prostaglandin_biosynthetic_process	16	0	0	1	1
GO:0001523_retinoid_metabolic_process	64	0	0	1	1
GO:0001558_regulation_of_cell_growth	66	1.52	0.99	0.640799	1	SOCS2
GO:0001561_fatty_acid_alpha-oxidation	9	0	0	1	1
GO:0001574_ganglioside_biosynthetic_process	11	0	0	1	1
GO:0001580_detection_of_chemical_stimulus_involved_in_sensory_perception_of_bitter_taste	36	0	0	1	1
GO:0001649_osteoblast_differentiation	106	1.89	1.23	0.486571	1	ID4;SEMA7A
GO:0001657_ureteric_bud_development	37	2.7	1.78	0.43655	1	BMP7
GO:0001658_branching_involved_in_ureteric_bud_morphogenesis	42	2.38	1.56	0.478612	1	ILK
GO:0001662_behavioral_fear_response	31	0	0	1	1
GO:0001675_acrosome_assembly	18	0	0	1	1
GO:0001678_cellular_glucose_homeostasis	22	0	0	1	1
GO:0001682_tRNA_5'-leader_removal	13	0	0	1	1
GO:0001702_gastrulation_with_mouth_forming_second	17	0	0	1	1
GO:0001706_endoderm_formation	12	0	0	1	1
GO:0001708_cell_fate_specification	34	0	0	1	1
GO:0001731_formation_of_translation_preinitiation_complex	10	0	0	1	1
GO:0001732_formation_of_cytoplasmic_translation_initiation_complex	16	0	0	1	1
GO:0001736_establishment_of_planar_polarity	14	0	0	1	1
GO:0001756_somitogenesis	44	2.27	1.49	0.494547	1	BMPR1A
GO:0001771_immunological_synapse_formation	11	0	0	1	1
GO:0001778_plasma_membrane_repair	12	0	0	1	1
GO:0001782_B_cell_homeostasis	22	0	0	1	1
GO:0001817_regulation_of_cytokine_production	33	3.03	2	0.400476	1	CD276
GO:0001818_negative_regulation_of_cytokine_production	15	0	0	1	1
GO:0001819_positive_regulation_of_cytokine_production	26	0	0	1	1
GO:0001824_blastocyst_development	19	0	0	1	1
GO:0001825_blastocyst_formation	18	0	0	1	1
GO:0001833_inner_cell_mass_cell_proliferation	13	0	0	1	1
GO:0001835_blastocyst_hatching	29	0	0	1	1
GO:0001836_release_of_cytochrome_c_from_mitochondria	22	0	0	1	1
GO:0001837_epithelial_to_mesenchymal_transition	42	2.38	1.56	0.478612	1	BMP7
GO:0001867_complement_activation,_lectin_pathway	10	0	0	1	1
GO:0001881_receptor_recycling	11	0	0	1	1
GO:0001886_endothelial_cell_morphogenesis	14	0	0	1	1
GO:0001889_liver_development	76	1.32	0.85	0.692484	1	RELA
GO:0001892_embryonic_placenta_development	19	0	0	1	1
GO:0001893_maternal_placenta_development	11	0	0	1	1
GO:0001894_tissue_homeostasis	21	0	0	1	1
GO:0001895_retina_homeostasis	37	0	0	1	1
GO:0001916_positive_regulation_of_T_cell_mediated_cytotoxicity	24	0	0	1	1
GO:0001932_regulation_of_protein_phosphorylation	44	0	0	1	1
GO:0001935_endothelial_cell_proliferation	15	0	0	1	1
GO:0001937_negative_regulation_of_endothelial_cell_proliferation	38	0	0	1	1
GO:0001938_positive_regulation_of_endothelial_cell_proliferation	73	0	0	1	1
GO:0001942_hair_follicle_development	37	2.7	1.78	0.43655	1	RELA
GO:0001944_vasculature_development	16	0	0	1	1
GO:0001946_lymphangiogenesis	11	0	0	1	1
GO:0001953_negative_regulation_of_cell-matrix_adhesion	22	0	0	1	1
GO:0001958_endochondral_ossification	29	0	0	1	1
GO:0001960_negative_regulation_of_cytokine-mediated_signaling_pathway	13	0	0	1	1
GO:0001961_positive_regulation_of_cytokine-mediated_signaling_pathway	10	0	0	1	1
GO:0001963_synaptic_transmission,_dopaminergic	11	0	0	1	1
GO:0001964_startle_response	13	0	0	1	1
GO:0001967_suckling_behavior	13	0	0	1	1
GO:0001975_response_to_amphetamine	33	3.03	2	0.400476	1	ICAM1
GO:0002003_angiotensin_maturation	12	0	0	1	1
GO:0002024_diet_induced_thermogenesis	12	0	0	1	1
GO:0002026_regulation_of_the_force_of_heart_contraction	17	0	0	1	1
GO:0002028_regulation_of_sodium_ion_transport	18	0	0	1	1
GO:0002031_G_protein-coupled_receptor_internalization	13	0	0	1	1
GO:0002062_chondrocyte_differentiation	38	2.63	1.73	0.445225	1	BMPR1A
GO:0002064_epithelial_cell_development	12	0	0	1	1
GO:0002076_osteoblast_development	19	0	0	1	1
GO:0002082_regulation_of_oxidative_phosphorylation	11	0	0	1	1
GO:0002084_protein_depalmitoylation	9	0	0	1	1
GO:0002087_regulation_of_respiratory_gaseous_exchange_by_nervous_system_process	13	0	0	1	1
GO:0002089_lens_morphogenesis_in_camera-type_eye	12	0	0	1	1
GO:0002091_negative_regulation_of_receptor_internalization	13	0	0	1	1
GO:0002098_tRNA_wobble_uridine_modification	15	0	0	1	1
GO:0002181_cytoplasmic_translation	41	0	0	1	1
GO:0002218_activation_of_innate_immune_response	26	0	0	1	1
GO:0002224_toll-like_receptor_signaling_pathway	44	0	0	1	1
GO:0002227_innate_immune_response_in_mucosa	26	0	0	1	1
GO:0002230_positive_regulation_of_defense_response_to_virus_by_host	29	0	0	1	1
GO:0002250_adaptive_immune_response	173	0	0	1	1
GO:0002281_macrophage_activation_involved_in_immune_response	11	0	0	1	1
GO:0002323_natural_killer_cell_activation_involved_in_immune_response	19	0	0	1	1
GO:0002376_immune_system_process	36	0	0	1	1
GO:0002377_immunoglobulin_production	14	0	0	1	1
GO:0002407_dendritic_cell_chemotaxis	17	0	0	1	1
GO:0002430_complement_receptor_mediated_signaling_pathway	12	0	0	1	1
GO:0002437_inflammatory_response_to_antigenic_stimulus	23	0	0	1	1
GO:0002479_antigen_processing_and_presentation_of_exogenous_peptide_antigen_via_MHC_class_I,_TAP-dependent	75	0	0	1	1
GO:0002526_acute_inflammatory_response	13	0	0	1	1
GO:0002548_monocyte_chemotaxis	44	2.27	1.49	0.494547	1	CCL2
GO:0002576_platelet_degranulation	124	0.81	0.52	0.854233	1	QSOX1
GO:0002687_positive_regulation_of_leukocyte_migration	11	0	0	1	1
GO:0002827_positive_regulation_of_T-helper_1_type_immune_response	9	0	0	1	1
GO:0002862_negative_regulation_of_inflammatory_response_to_antigenic_stimulus	13	0	0	1	1
GO:0002931_response_to_ischemia	55	1.82	1.19	0.573887	1	HSPD1
GO:0003007_heart_morphogenesis	39	0	0	1	1
GO:0003009_skeletal_muscle_contraction	26	0	0	1	1
GO:0003016_respiratory_system_process	14	0	0	1	1
GO:0003073_regulation_of_systemic_arterial_blood_pressure	12	0	0	1	1
GO:0003094_glomerular_filtration	10	0	0	1	1
GO:0003139_secondary_heart_field_specification	11	0	0	1	1
GO:0003180_aortic_valve_morphogenesis	28	0	0	1	1
GO:0003184_pulmonary_valve_morphogenesis	15	0	0	1	1
GO:0003198_epithelial_to_mesenchymal_transition_involved_in_endocardial_cushion_formation	12	0	0	1	1
GO:0003279_cardiac_septum_development	11	0	0	1	1
GO:0003323_type_B_pancreatic_cell_development	12	0	0	1	1
GO:0003341_cilium_movement	40	0	0	1	1
GO:0003376_sphingosine-1-phosphate_receptor_signaling_pathway	10	0	0	1	1
GO:0003382_epithelial_cell_morphogenesis	16	0	0	1	1
GO:0003407_neural_retina_development	14	0	0	1	1
GO:0005513_detection_of_calcium_ion	13	0	0	1	1
GO:0005978_glycogen_biosynthetic_process	19	0	0	1	1
GO:0005979_regulation_of_glycogen_biosynthetic_process	12	0	0	1	1
GO:0005980_glycogen_catabolic_process	16	0	0	1	1
GO:0006002_fructose_6-phosphate_metabolic_process	12	0	0	1	1
GO:0006004_fucose_metabolic_process	7	0	0	1	1
GO:0006006_glucose_metabolic_process	55	0	0	1	1
GO:0006024_glycosaminoglycan_biosynthetic_process	38	2.63	1.73	0.445225	1	XYLT2
GO:0006068_ethanol_catabolic_process	13	0	0	1	1
GO:0006069_ethanol_oxidation	12	0	0	1	1
GO:0006071_glycerol_metabolic_process	13	0	0	1	1
GO:0006082_organic_acid_metabolic_process	20	0	0	1	1
GO:0006090_pyruvate_metabolic_process	23	0	0	1	1
GO:0006091_generation_of_precursor_metabolites_and_energy	48	0	0	1	1
GO:0006096_glycolytic_process	33	3.03	2	0.400476	1	OGDHL
GO:0006098_pentose-phosphate_shunt	12	0	0	1	1
GO:0006103_2-oxoglutarate_metabolic_process	16	0	0	1	1
GO:0006108_malate_metabolic_process	8	0	0	1	1
GO:0006111_regulation_of_gluconeogenesis	14	0	0	1	1
GO:0006112_energy_reserve_metabolic_process	15	0	0	1	1
GO:0006119_oxidative_phosphorylation	17	0	0	1	1
GO:0006120_mitochondrial_electron_transport,_NADH_to_ubiquinone	49	0	0	1	1
GO:0006122_mitochondrial_electron_transport,_ubiquinol_to_cytochrome_c	14	0	0	1	1
GO:0006123_mitochondrial_electron_transport,_cytochrome_c_to_oxygen	20	0	0	1	1
GO:0006139_nucleobase-containing_compound_metabolic_process	31	0	0	1	1
GO:0006163_purine_nucleotide_metabolic_process	12	0	0	1	1
GO:0006164_purine_nucleotide_biosynthetic_process	11	0	0	1	1
GO:0006165_nucleoside_diphosphate_phosphorylation	16	0	0	1	1
GO:0006182_cGMP_biosynthetic_process	11	0	0	1	1
GO:0006183_GTP_biosynthetic_process	10	0	0	1	1
GO:0006195_purine_nucleotide_catabolic_process	13	0	0	1	1
GO:0006241_CTP_biosynthetic_process	10	0	0	1	1
GO:0006275_regulation_of_DNA_replication	22	0	0	1	1
GO:0006289_nucleotide-excision_repair	39	2.56	1.69	0.453767	1	MMS19
GO:0006293_nucleotide-excision_repair,_preincision_complex_stabilization	21	0	0	1	1
GO:0006294_nucleotide-excision_repair,_preincision_complex_assembly	29	0	0	1	1
GO:0006295_nucleotide-excision_repair,_DNA_incision,_3'-to_lesion	21	0	0	1	1
GO:0006296_nucleotide-excision_repair,_DNA_incision,_5'-to_lesion	37	0	0	1	1
GO:0006301_postreplication_repair	10	0	0	1	1
GO:0006302_double-strand_break_repair	61	0	0	1	1
GO:0006306_DNA_methylation	23	0	0	1	1
GO:0006307_DNA_dealkylation_involved_in_DNA_repair	10	0	0	1	1
GO:0006309_apoptotic_DNA_fragmentation	16	0	0	1	1
GO:0006336_DNA_replication-independent_nucleosome_assembly	26	0	0	1	1
GO:0006337_nucleosome_disassembly	18	0	0	1	1
GO:0006338_chromatin_remodeling	99	1.01	0.65	0.784925	1	NPM3
GO:0006342_chromatin_silencing	47	2.13	1.39	0.517542	1	SIRT2
GO:0006352_DNA-templated_transcription,_initiation	31	0	0	1	1
GO:0006355_regulation_of_transcription,_DNA-templated	757	1.45	0.94	0.617809	1	NFATC2;PHF19;E2F1;NFKB2;FUS;SRRT;PATZ1;CXXC1;DVL2;GPBP1;RELA
GO:0006357_regulation_of_transcription_by_RNA_polymerase_II	1291	1.32	0.85	0.777329	1	ATF3;MDM2;FUS;STAT5B;NHLH1;ZNF276;PATZ1;BRD2;HES5;ZNF692;MYCN;MEIS3;RFX5;PIAS3;PAX6;HSPD1;TFDP1
GO:0006361_transcription_initiation_from_RNA_polymerase_I_promoter	33	3.03	2	0.400476	1	TAF1C
GO:0006364_rRNA_processing	143	0.7	0.45	0.891567	1	NPM3
GO:0006367_transcription_initiation_from_RNA_polymerase_II_promoter	160	1.88	1.23	0.447147	1	E2F2;NR4A3;CDK4
GO:0006368_transcription_elongation_from_RNA_polymerase_II_promoter	74	0	0	1	1
GO:0006369_termination_of_RNA_polymerase_II_transcription	34	2.94	1.94	0.409705	1	CPSF4
GO:0006370_7-methylguanosine_mRNA_capping	33	0	0	1	1
GO:0006376_mRNA_splice_site_selection	21	0	0	1	1
GO:0006378_mRNA_polyadenylation	30	0	0	1	1
GO:0006382_adenosine_to_inosine_editing	7	0	0	1	1
GO:0006383_transcription_by_RNA_polymerase_III	23	0	0	1	1
GO:0006390_mitochondrial_transcription	10	0	0	1	1
GO:0006396_RNA_processing	491	0.2	0.13	0.999537	1	HNRNPL
GO:0006400_tRNA_modification	32	0	0	1	1
GO:0006405_RNA_export_from_nucleus	56	1.79	1.16	0.580452	1	U2AF2
GO:0006412_translation	176	0.57	0.36	0.935171	1	GGT7
GO:0006413_translational_initiation	130	0	0	1	1
GO:0006414_translational_elongation	20	0	0	1	1
GO:0006417_regulation_of_translation	61	1.64	1.07	0.611794	1	HNRNPL
GO:0006418_tRNA_aminoacylation_for_protein_translation	38	2.63	1.73	0.445225	1	VARS2
GO:0006464_cellular_protein_modification_process	81	0	0	1	1
GO:0006465_signal_peptide_processing	11	0	0	1	1
GO:0006470_protein_dephosphorylation	148	0.68	0.43	0.899693	1	PPP5C
GO:0006487_protein_N-linked_glycosylation	45	0	0	1	1
GO:0006488_dolichol-linked_oligosaccharide_biosynthetic_process	15	0	0	1	1
GO:0006493_protein_O-linked_glycosylation	36	2.78	1.83	0.42774	1	POMT1
GO:0006506_GPI_anchor_biosynthetic_process	25	0	0	1	1
GO:0006508_proteolysis	428	1.17	0.75	0.78959	1	ADAM11;GGT7;PMPCA;AZU1;SPG7
GO:0006509_membrane_protein_ectodomain_proteolysis	20	0	0	1	1
GO:0006515_protein_quality_control_for_misfolded_or_incompletely_synthesized_proteins	13	0	0	1	1
GO:0006516_glycoprotein_catabolic_process	12	0	0	1	1
GO:0006518_peptide_metabolic_process	13	0	0	1	1
GO:0006520_cellular_amino_acid_metabolic_process	19	0	0	1	1
GO:0006521_regulation_of_cellular_amino_acid_metabolic_process	51	0	0	1	1
GO:0006536_glutamate_metabolic_process	14	0	0	1	1
GO:0006541_glutamine_metabolic_process	18	0	0	1	1
GO:0006548_histidine_catabolic_process	8	0	0	1	1
GO:0006552_leucine_catabolic_process	6	0	0	1	1
GO:0006554_lysine_catabolic_process	12	0	0	1	1
GO:0006556_S-adenosylmethionine_biosynthetic_process	4	0	0	1	1
GO:0006559_L-phenylalanine_catabolic_process	11	0	0	1	1
GO:0006564_L-serine_biosynthetic_process	7	0	0	1	1
GO:0006590_thyroid_hormone_generation	17	0	0	1	1
GO:0006605_protein_targeting	43	2.33	1.53	0.486641	1	AKAP5
GO:0006607_NLS-bearing_protein_import_into_nucleus	20	0	0	1	1
GO:0006611_protein_export_from_nucleus	28	0	0	1	1
GO:0006612_protein_targeting_to_membrane	53	1.89	1.23	0.560449	1	ZDHHC22
GO:0006614_SRP-dependent_cotranslational_protein_targeting_to_membrane	89	0	0	1	1
GO:0006617_SRP-dependent_cotranslational_protein_targeting_to_membrane,_signal_sequence_recognition	10	0	0	1	1
GO:0006623_protein_targeting_to_vacuole	16	0	0	1	1
GO:0006625_protein_targeting_to_peroxisome	65	1.54	1	0.635177	1	PEX6
GO:0006626_protein_targeting_to_mitochondrion	30	0	0	1	1
GO:0006631_fatty_acid_metabolic_process	65	0	0	1	1
GO:0006633_fatty_acid_biosynthetic_process	43	2.33	1.53	0.486641	1	ACACB
GO:0006636_unsaturated_fatty_acid_biosynthetic_process	14	0	0	1	1
GO:0006637_acyl-CoA_metabolic_process	31	0	0	1	1
GO:0006641_triglyceride_metabolic_process	32	0	0	1	1
GO:0006644_phospholipid_metabolic_process	57	0	0	1	1
GO:0006654_phosphatidic_acid_biosynthetic_process	48	2.08	1.36	0.524973	1	PLD2
GO:0006656_phosphatidylcholine_biosynthetic_process	34	0	0	1	1
GO:0006661_phosphatidylinositol_biosynthetic_process	77	1.3	0.84	0.697226	1	PIK3CB
GO:0006665_sphingolipid_metabolic_process	25	0	0	1	1
GO:0006672_ceramide_metabolic_process	21	0	0	1	1
GO:0006690_icosanoid_metabolic_process	9	0	0	1	1
GO:0006691_leukotriene_metabolic_process	17	0	0	1	1
GO:0006693_prostaglandin_metabolic_process	20	0	0	1	1
GO:0006695_cholesterol_biosynthetic_process	40	2.5	1.64	0.462177	1	LSS
GO:0006703_estrogen_biosynthetic_process	13	0	0	1	1
GO:0006704_glucocorticoid_biosynthetic_process	10	0	0	1	1
GO:0006729_tetrahydrobiopterin_biosynthetic_process	7	0	0	1	1
GO:0006744_ubiquinone_biosynthetic_process	16	0	0	1	1
GO:0006749_glutathione_metabolic_process	33	3.03	2	0.400476	1	SLC7A11
GO:0006754_ATP_biosynthetic_process	28	0	0	1	1
GO:0006768_biotin_metabolic_process	9	0	0	1	1
GO:0006790_sulfur_compound_metabolic_process	15	0	0	1	1
GO:0006796_phosphate-containing_compound_metabolic_process	17	0	0	1	1
GO:0006801_superoxide_metabolic_process	20	0	0	1	1
GO:0006805_xenobiotic_metabolic_process	94	1.06	0.69	0.767535	1	CYP46A1
GO:0006809_nitric_oxide_biosynthetic_process	13	0	0	1	1
GO:0006810_transport	36	2.78	1.83	0.42774	1	CNNM3
GO:0006812_cation_transport	29	0	0	1	1
GO:0006813_potassium_ion_transport	68	0	0	1	1
GO:0006814_sodium_ion_transport	77	0	0	1	1
GO:0006820_anion_transport	18	0	0	1	1
GO:0006821_chloride_transport	37	2.7	1.78	0.43655	1	SLC26A6
GO:0006825_copper_ion_transport	15	0	0	1	1
GO:0006826_iron_ion_transport	19	0	0	1	1
GO:0006828_manganese_ion_transport	11	0	0	1	1
GO:0006868_glutamine_transport	8	0	0	1	1
GO:0006869_lipid_transport	60	0	0	1	1
GO:0006874_cellular_calcium_ion_homeostasis	98	1.02	0.66	0.781554	1	ATP2A1
GO:0006878_cellular_copper_ion_homeostasis	14	0	0	1	1
GO:0006879_cellular_iron_ion_homeostasis	61	1.64	1.07	0.611794	1	TTC7A
GO:0006882_cellular_zinc_ion_homeostasis	30	0	0	1	1
GO:0006883_cellular_sodium_ion_homeostasis	18	0	0	1	1
GO:0006884_cell_volume_homeostasis	19	0	0	1	1
GO:0006888_endoplasmic_reticulum_to_Golgi_vesicle-mediated_transport	183	1.64	1.07	0.535934	1	DYNLL2;DYNLL1;SEC24D
GO:0006890_retrograde_vesicle-mediated_transport,_Golgi_to_endoplasmic_reticulum	85	1.18	0.76	0.732624	1	KIF22
GO:0006891_intra-Golgi_vesicle-mediated_transport	32	0	0	1	1
GO:0006892_post-Golgi_vesicle-mediated_transport	19	0	0	1	1
GO:0006893_Golgi_to_plasma_membrane_transport	23	0	0	1	1
GO:0006900_vesicle_budding_from_membrane	15	0	0	1	1
GO:0006904_vesicle_docking_involved_in_exocytosis	33	0	0	1	1
GO:0006909_phagocytosis	60	0	0	1	1
GO:0006910_phagocytosis,_recognition	9	0	0	1	1
GO:0006911_phagocytosis,_engulfment	26	0	0	1	1
GO:0006937_regulation_of_muscle_contraction	14	0	0	1	1
GO:0006940_regulation_of_smooth_muscle_contraction	14	0	0	1	1
GO:0006941_striated_muscle_contraction	14	0	0	1	1
GO:0006952_defense_response	73	1.37	0.89	0.677811	1	STAT5B
GO:0006953_acute-phase_response	37	0	0	1	1
GO:0006955_immune_response	299	1.67	1.09	0.487703	1	CXCL10;CXCL3;CXCL8;SEMA7A;BMPR1A
GO:0006956_complement_activation	28	0	0	1	1
GO:0006957_complement_activation,_alternative_pathway	13	0	0	1	1
GO:0006958_complement_activation,_classical_pathway	34	0	0	1	1
GO:0006959_humoral_immune_response	59	1.69	1.1	0.599548	1	CCL2
GO:0006968_cellular_defense_response	52	1.92	1.26	0.553571	1	RELA
GO:0006970_response_to_osmotic_stress	19	0	0	1	1
GO:0006978_DNA_damage_response,_signal_transduction_by_p53_class_mediator_resulting_in_transcription_of_p21_class_mediator	14	0	0	1	1
GO:0006983_ER_overload_response	11	0	0	1	1
GO:0006995_cellular_response_to_nitrogen_starvation	12	0	0	1	1
GO:0006996_organelle_organization	11	0	0	1	1
GO:0007005_mitochondrion_organization	90	2.22	1.46	0.403786	1	FANCG;SPG7
GO:0007007_inner_mitochondrial_membrane_organization	18	0	0	1	1
GO:0007009_plasma_membrane_organization	23	0	0	1	1
GO:0007015_actin_filament_organization	119	0.84	0.54	0.842436	1	HIP1R
GO:0007020_microtubule_nucleation	18	0	0	1	1
GO:0007026_negative_regulation_of_microtubule_depolymerization	27	0	0	1	1
GO:0007029_endoplasmic_reticulum_organization	34	2.94	1.94	0.409705	1	SMPD4
GO:0007032_endosome_organization	38	0	0	1	1
GO:0007035_vacuolar_acidification	14	0	0	1	1
GO:0007040_lysosome_organization	42	0	0	1	1
GO:0007043_cell-cell_junction_assembly	37	2.7	1.78	0.43655	1	HDAC7
GO:0007084_mitotic_nuclear_envelope_reassembly	10	0	0	1	1
GO:0007097_nuclear_migration	15	0	0	1	1
GO:0007129_homologous_chromosome_pairing_at_meiosis	26	0	0	1	1
GO:0007154_cell_communication	18	0	0	1	1
GO:0007155_cell_adhesion	483	1.66	1.08	0.465542	1	VCAM1;CCL2;ICAM1;CNTN1;PXN;DDR2;HES5;CLDN15
GO:0007156_homophilic_cell_adhesion_via_plasma_membrane_adhesion_molecules	167	0.6	0.38	0.925403	1	IGSF9
GO:0007158_neuron_cell-cell_adhesion	17	0	0	1	1
GO:0007162_negative_regulation_of_cell_adhesion	50	0	0	1	1
GO:0007163_establishment_or_maintenance_of_cell_polarity	49	0	0	1	1
GO:0007168_receptor_guanylyl_cyclase_signaling_pathway	10	0	0	1	1
GO:0007171_activation_of_transmembrane_receptor_protein_tyrosine_kinase_activity	13	0	0	1	1
GO:0007173_epidermal_growth_factor_receptor_signaling_pathway	49	0	0	1	1
GO:0007175_negative_regulation_of_epidermal_growth_factor-activated_receptor_activity	14	0	0	1	1
GO:0007179_transforming_growth_factor_beta_receptor_signaling_pathway	101	1.98	1.3	0.461452	1	PXN;BMPR1A
GO:0007186_G_protein-coupled_receptor_signaling_pathway	1097	1.55	1.01	0.521726	1	CXCL10;CCL2;CXCL3;F2RL1;CXCL8;PDE2A;ARHGEF1;GPR162;ARHGEF25;EDNRA;ADCY3;TMEM145;FGD3;PLEKHG2;PIK3CB;GPR173;EDNRB
GO:0007187_G_protein-coupled_receptor_signaling_pathway,_coupled_to_cyclic_nucleotide_second_messenger	63	1.59	1.03	0.623666	1	CCL2
GO:0007188_adenylate_cyclase-modulating_G_protein-coupled_receptor_signaling_pathway	50	0	0	1	1
GO:0007189_adenylate_cyclase-activating_G_protein-coupled_receptor_signaling_pathway	113	1.77	1.15	0.520484	1	CXCL10;ADCY3
GO:0007191_adenylate_cyclase-activating_dopamine_receptor_signaling_pathway	11	0	0	1	1
GO:0007200_phospholipase_C-activating_G_protein-coupled_receptor_signaling_pathway	60	1.67	1.09	0.605718	1	EDNRB
GO:0007212_dopamine_receptor_signaling_pathway	18	0	0	1	1
GO:0007213_G_protein-coupled_acetylcholine_receptor_signaling_pathway	15	0	0	1	1
GO:0007214_gamma-aminobutyric_acid_signaling_pathway	27	0	0	1	1
GO:0007215_glutamate_receptor_signaling_pathway	16	0	0	1	1
GO:0007216_G_protein-coupled_glutamate_receptor_signaling_pathway	15	0	0	1	1
GO:0007218_neuropeptide_signaling_pathway	105	0	0	1	1
GO:0007220_Notch_receptor_processing	9	0	0	1	1
GO:0007221_positive_regulation_of_transcription_of_Notch_receptor_target	18	0	0	1	1
GO:0007223_Wnt_signaling_pathway,_calcium_modulating_pathway	37	0	0	1	1
GO:0007250_activation_of_NF-kappaB-inducing_kinase_activity	17	0	0	1	1
GO:0007252_I-kappaB_phosphorylation	12	0	0	1	1
GO:0007254_JNK_cascade	48	0	0	1	1
GO:0007256_activation_of_JNKK_activity	11	0	0	1	1
GO:0007257_activation_of_JUN_kinase_activity	40	0	0	1	1
GO:0007260_tyrosine_phosphorylation_of_STAT_protein	9	0	0	1	1
GO:0007263_nitric_oxide_mediated_signal_transduction	19	0	0	1	1
GO:0007264_small_GTPase_mediated_signal_transduction	94	1.06	0.69	0.767535	1	PLD2
GO:0007266_Rho_protein_signal_transduction	57	1.75	1.14	0.586916	1	ARHGEF1
GO:0007267_cell-cell_signaling	228	1.75	1.14	0.465845	1	NAMPT;CXCL10;SEMA4F;THY1
GO:0007268_chemical_synaptic_transmission	246	1.22	0.79	0.731799	1	CACNB3;AKAP5;PLP1
GO:0007271_synaptic_transmission,_cholinergic	25	0	0	1	1
GO:0007274_neuromuscular_synaptic_transmission	19	0	0	1	1
GO:0007275_multicellular_organism_development	469	1.49	0.97	0.584093	1	FSTL5;DDX11;EPHB3;POMT1;DDR2;DIP2A;VSX2
GO:0007276_gamete_generation	20	0	0	1	1
GO:0007281_germ_cell_development	35	0	0	1	1
GO:0007288_sperm_axoneme_assembly	16	0	0	1	1
GO:0007292_female_gamete_generation	19	0	0	1	1
GO:0007339_binding_of_sperm_to_zona_pellucida	41	0	0	1	1
GO:0007368_determination_of_left/right_symmetry	59	1.69	1.1	0.599548	1	GAS8
GO:0007389_pattern_specification_process	30	0	0	1	1
GO:0007399_nervous_system_development	303	1.32	0.86	0.687303	1	SEMA4F;SPG7;CYP46A1;EDNRB
GO:0007409_axonogenesis	78	1.28	0.83	0.701894	1	TRIM46
GO:0007416_synapse_assembly	63	0	0	1	1
GO:0007492_endoderm_development	20	0	0	1	1
GO:0007498_mesoderm_development	30	0	0	1	1
GO:0007512_adult_heart_development	14	0	0	1	1
GO:0007519_skeletal_muscle_tissue_development	50	0	0	1	1
GO:0007520_myoblast_fusion	22	0	0	1	1
GO:0007548_sex_differentiation	20	0	0	1	1
GO:0007566_embryo_implantation	42	2.38	1.56	0.478612	1	VMP1
GO:0007584_response_to_nutrient	68	0	0	1	1
GO:0007588_excretion	32	0	0	1	1
GO:0007597_blood_coagulation,_intrinsic_pathway	17	0	0	1	1
GO:0007600_sensory_perception	11	0	0	1	1
GO:0007601_visual_perception	206	1.46	0.95	0.61607	1	COL11A1;VSX2;PAX6
GO:0007602_phototransduction	27	0	0	1	1
GO:0007605_sensory_perception_of_sound	144	1.39	0.9	0.651885	1	ICAM1;COL11A1
GO:0007608_sensory_perception_of_smell	99	1.01	0.65	0.784925	1	ADCY3
GO:0007611_learning_or_memory	61	0	0	1	1
GO:0007612_learning	61	1.64	1.07	0.611794	1	AAAS
GO:0007614_short-term_memory	11	0	0	1	1
GO:0007625_grooming_behavior	14	0	0	1	1
GO:0007626_locomotory_behavior	86	0	0	1	1
GO:0007628_adult_walking_behavior	27	0	0	1	1
GO:0007631_feeding_behavior	28	0	0	1	1
GO:0008015_blood_circulation	34	2.94	1.94	0.409705	1	CXCL10
GO:0008016_regulation_of_heart_contraction	35	0	0	1	1
GO:0008033_tRNA_processing	19	0	0	1	1
GO:0008037_cell_recognition	9	0	0	1	1
GO:0008045_motor_neuron_axon_guidance	26	0	0	1	1
GO:0008090_retrograde_axonal_transport	11	0	0	1	1
GO:0008150_biological_process	592	1.01	0.65	0.894819	1	CDCA3;SMYD5;TMEM120B;TSPOAP1;EHBP1L1;GRIPAP1
GO:0008154_actin_polymerization_or_depolymerization	22	0	0	1	1
GO:0008202_steroid_metabolic_process	43	0	0	1	1
GO:0008203_cholesterol_metabolic_process	75	1.33	0.87	0.687669	1	GBA2
GO:0008209_androgen_metabolic_process	16	0	0	1	1
GO:0008210_estrogen_metabolic_process	20	0	0	1	1
GO:0008219_cell_death	36	0	0	1	1
GO:0008277_regulation_of_G_protein-coupled_receptor_signaling_pathway	43	0	0	1	1
GO:0008286_insulin_receptor_signaling_pathway	84	0	0	1	1
GO:0008299_isoprenoid_biosynthetic_process	9	0	0	1	1
GO:0008333_endosome_to_lysosome_transport	46	2.17	1.42	0.509995	1	BIN1
GO:0008334_histone_mRNA_metabolic_process	12	0	0	1	1
GO:0008343_adult_feeding_behavior	12	0	0	1	1
GO:0008344_adult_locomotory_behavior	48	2.08	1.36	0.524973	1	ID2
GO:0008361_regulation_of_cell_size	21	0	0	1	1
GO:0008406_gonad_development	11	0	0	1	1
GO:0008542_visual_learning	47	2.13	1.39	0.517542	1	SLC7A11
GO:0008543_fibroblast_growth_factor_receptor_signaling_pathway	80	0	0	1	1
GO:0008544_epidermis_development	80	1.25	0.81	0.711017	1	TFDP1
GO:0008584_male_gonad_development	95	2.11	1.38	0.430385	1	FANCA;PATZ1
GO:0008589_regulation_of_smoothened_signaling_pathway	21	0	0	1	1
GO:0008593_regulation_of_Notch_signaling_pathway	17	0	0	1	1
GO:0008610_lipid_biosynthetic_process	14	0	0	1	1
GO:0008611_ether_lipid_biosynthetic_process	6	0	0	1	1
GO:0008625_extrinsic_apoptotic_signaling_pathway_via_death_domain_receptors	33	3.03	2	0.400476	1	DELE1
GO:0008630_intrinsic_apoptotic_signaling_pathway_in_response_to_DNA_damage	43	2.33	1.53	0.486641	1	E2F1
GO:0008631_intrinsic_apoptotic_signaling_pathway_in_response_to_oxidative_stress	14	0	0	1	1
GO:0008645_hexose_transmembrane_transport	13	0	0	1	1
GO:0008652_cellular_amino_acid_biosynthetic_process	25	0	0	1	1
GO:0008654_phospholipid_biosynthetic_process	24	0	0	1	1
GO:0009048_dosage_compensation_by_inactivation_of_X_chromosome	12	0	0	1	1
GO:0009060_aerobic_respiration	32	0	0	1	1
GO:0009062_fatty_acid_catabolic_process	12	0	0	1	1
GO:0009083_branched-chain_amino_acid_catabolic_process	20	0	0	1	1
GO:0009100_glycoprotein_metabolic_process	11	0	0	1	1
GO:0009116_nucleoside_metabolic_process	12	0	0	1	1
GO:0009142_nucleoside_triphosphate_biosynthetic_process	9	0	0	1	1
GO:0009165_nucleotide_biosynthetic_process	11	0	0	1	1
GO:0009168_purine_ribonucleoside_monophosphate_biosynthetic_process	13	0	0	1	1
GO:0009313_oligosaccharide_catabolic_process	11	0	0	1	1
GO:0009395_phospholipid_catabolic_process	12	0	0	1	1
GO:0009411_response_to_UV	42	0	0	1	1
GO:0009435_NAD_biosynthetic_process	12	0	0	1	1
GO:0009584_detection_of_visible_light	14	0	0	1	1
GO:0009611_response_to_wounding	60	1.67	1.09	0.605718	1	PAX6
GO:0009612_response_to_mechanical_stimulus	54	1.85	1.21	0.56722	1	TXNIP
GO:0009615_response_to_virus	104	1.92	1.26	0.47661	1	ACTA2;HYAL2
GO:0009617_response_to_bacterium	94	1.06	0.69	0.767535	1	CCL2
GO:0009653_anatomical_structure_morphogenesis	131	0.76	0.49	0.869284	1	FBN3
GO:0009743_response_to_carbohydrate	13	0	0	1	1
GO:0009749_response_to_glucose	68	1.47	0.96	0.651787	1	TXNIP
GO:0009755_hormone-mediated_signaling_pathway	47	0	0	1	1
GO:0009790_embryo_development	17	0	0	1	1
GO:0009791_post-embryonic_development	67	1.49	0.97	0.646336	1	STK36
GO:0009792_embryo_development_ending_in_birth_or_egg_hatching	21	0	0	1	1
GO:0009888_tissue_development	34	0	0	1	1
GO:0009948_anterior/posterior_axis_specification	16	0	0	1	1
GO:0009952_anterior/posterior_pattern_specification	97	1.03	0.67	0.77813	1	HES5
GO:0009953_dorsal/ventral_pattern_formation	35	2.86	1.89	0.418792	1	BMPR1A
GO:0009954_proximal/distal_pattern_formation	26	0	0	1	1
GO:0009968_negative_regulation_of_signal_transduction	41	0	0	1	1
GO:0009972_cytidine_deamination	12	0	0	1	1
GO:0010001_glial_cell_differentiation	14	0	0	1	1
GO:0010038_response_to_metal_ion	12	0	0	1	1
GO:0010165_response_to_X-ray	20	0	0	1	1
GO:0010243_response_to_organonitrogen_compound	16	0	0	1	1
GO:0010248_establishment_or_maintenance_of_transmembrane_electrochemical_gradient	14	0	0	1	1
GO:0010269_response_to_selenium_ion	10	0	0	1	1
GO:0010273_detoxification_of_copper_ion	15	0	0	1	1
GO:0010447_response_to_acidic_pH	14	0	0	1	1
GO:0010457_centriole-centriole_cohesion	11	0	0	1	1
GO:0010458_exit_from_mitosis	11	0	0	1	1
GO:0010459_negative_regulation_of_heart_rate	12	0	0	1	1
GO:0010460_positive_regulation_of_heart_rate	22	0	0	1	1
GO:0010466_negative_regulation_of_peptidase_activity	14	0	0	1	1
GO:0010467_gene_expression	21	0	0	1	1
GO:0010468_regulation_of_gene_expression	227	1.76	1.15	0.462487	1	CDK10;MAPK12;MAPK6;CDK4
GO:0010469_regulation_of_signaling_receptor_activity	15	0	0	1	1
GO:0010498_proteasomal_protein_catabolic_process	34	0	0	1	1
GO:0010499_proteasomal_ubiquitin-independent_protein_catabolic_process	22	0	0	1	1
GO:0010501_RNA_secondary_structure_unwinding	8	0	0	1	1
GO:0010506_regulation_of_autophagy	69	1.45	0.94	0.657154	1	OSBPL7
GO:0010508_positive_regulation_of_autophagy	57	1.75	1.14	0.586916	1	PIK3CB
GO:0010510_regulation_of_acetyl-CoA_biosynthetic_process_from_pyruvate	8	0	0	1	1
GO:0010524_positive_regulation_of_calcium_ion_transport_into_cytosol	12	0	0	1	1
GO:0010529_negative_regulation_of_transposition	19	0	0	1	1
GO:0010564_regulation_of_cell_cycle_process	11	0	0	1	1
GO:0010569_regulation_of_double-strand_break_repair_via_homologous_recombination	19	0	0	1	1
GO:0010592_positive_regulation_of_lamellipodium_assembly	25	0	0	1	1
GO:0010595_positive_regulation_of_endothelial_cell_migration	61	0	0	1	1
GO:0010596_negative_regulation_of_endothelial_cell_migration	24	0	0	1	1
GO:0010608_posttranscriptional_regulation_of_gene_expression	24	0	0	1	1
GO:0010614_negative_regulation_of_cardiac_muscle_hypertrophy	19	0	0	1	1
GO:0010633_negative_regulation_of_epithelial_cell_migration	16	0	0	1	1
GO:0010634_positive_regulation_of_epithelial_cell_migration	37	0	0	1	1
GO:0010666_positive_regulation_of_cardiac_muscle_cell_apoptotic_process	19	0	0	1	1
GO:0010667_negative_regulation_of_cardiac_muscle_cell_apoptotic_process	37	2.7	1.78	0.43655	1	ILK
GO:0010700_negative_regulation_of_norepinephrine_secretion	8	0	0	1	1
GO:0010717_regulation_of_epithelial_to_mesenchymal_transition	13	0	0	1	1
GO:0010718_positive_regulation_of_epithelial_to_mesenchymal_transition	45	2.22	1.46	0.502331	1	BMP7
GO:0010719_negative_regulation_of_epithelial_to_mesenchymal_transition	37	0	0	1	1
GO:0010737_protein_kinase_A_signaling	14	0	0	1	1
GO:0010744_positive_regulation_of_macrophage_derived_foam_cell_differentiation	19	0	0	1	1
GO:0010759_positive_regulation_of_macrophage_chemotaxis	19	0	0	1	1
GO:0010762_regulation_of_fibroblast_migration	12	0	0	1	1
GO:0010811_positive_regulation_of_cell-substrate_adhesion	37	0	0	1	1
GO:0010820_positive_regulation_of_T_cell_chemotaxis	16	0	0	1	1
GO:0010831_positive_regulation_of_myotube_differentiation	15	0	0	1	1
GO:0010832_negative_regulation_of_myotube_differentiation	16	0	0	1	1
GO:0010839_negative_regulation_of_keratinocyte_proliferation	18	0	0	1	1
GO:0010842_retina_layer_formation	25	0	0	1	1
GO:0010863_positive_regulation_of_phospholipase_C_activity	13	0	0	1	1
GO:0010867_positive_regulation_of_triglyceride_biosynthetic_process	15	0	0	1	1
GO:0010873_positive_regulation_of_cholesterol_esterification	9	0	0	1	1
GO:0010880_regulation_of_release_of_sequestered_calcium_ion_into_cytosol_by_sarcoplasmic_reticulum	20	0	0	1	1
GO:0010881_regulation_of_cardiac_muscle_contraction_by_regulation_of_the_release_of_sequestered_calcium_ion	24	0	0	1	1
GO:0010887_negative_regulation_of_cholesterol_storage	10	0	0	1	1
GO:0010890_positive_regulation_of_sequestering_of_triglyceride	9	0	0	1	1
GO:0010898_positive_regulation_of_triglyceride_catabolic_process	9	0	0	1	1
GO:0010917_negative_regulation_of_mitochondrial_membrane_potential	14	0	0	1	1
GO:0010918_positive_regulation_of_mitochondrial_membrane_potential	11	0	0	1	1
GO:0010940_positive_regulation_of_necrotic_cell_death	10	0	0	1	1
GO:0010942_positive_regulation_of_cell_death	36	0	0	1	1
GO:0010950_positive_regulation_of_endopeptidase_activity	11	0	0	1	1
GO:0010951_negative_regulation_of_endopeptidase_activity	147	0.68	0.44	0.898117	1	UBE2O
GO:0010954_positive_regulation_of_protein_processing	15	0	0	1	1
GO:0010972_negative_regulation_of_G2/M_transition_of_mitotic_cell_cycle	60	0	0	1	1
GO:0010975_regulation_of_neuron_projection_development	31	0	0	1	1
GO:0010977_negative_regulation_of_neuron_projection_development	64	1.56	1.02	0.629466	1	MDM2
GO:0010989_negative_regulation_of_low-density_lipoprotein_particle_clearance	14	0	0	1	1
GO:0014066_regulation_of_phosphatidylinositol_3-kinase_signaling	22	0	0	1	1
GO:0014067_negative_regulation_of_phosphatidylinositol_3-kinase_signaling	17	0	0	1	1
GO:0014823_response_to_activity	47	2.13	1.39	0.517542	1	HSPD1
GO:0014850_response_to_muscle_activity	21	0	0	1	1
GO:0014898_cardiac_muscle_hypertrophy_in_response_to_stress	14	0	0	1	1
GO:0015074_DNA_integration	8	0	0	1	1
GO:0015671_oxygen_transport	15	0	0	1	1
GO:0015693_magnesium_ion_transport	13	0	0	1	1
GO:0015695_organic_cation_transport	10	0	0	1	1
GO:0015698_inorganic_anion_transport	23	0	0	1	1
GO:0015711_organic_anion_transport	17	0	0	1	1
GO:0015721_bile_acid_and_bile_salt_transport	28	0	0	1	1
GO:0015760_glucose-6-phosphate_transport	6	0	0	1	1
GO:0015804_neutral_amino_acid_transport	13	0	0	1	1
GO:0015810_aspartate_transmembrane_transport	9	0	0	1	1
GO:0015813_L-glutamate_transmembrane_transport	15	0	0	1	1
GO:0015816_glycine_transport	9	0	0	1	1
GO:0015867_ATP_transport	28	0	0	1	1
GO:0015871_choline_transport	7	0	0	1	1
GO:0015886_heme_transport	8	0	0	1	1
GO:0015909_long-chain_fatty_acid_transport	16	0	0	1	1
GO:0015914_phospholipid_transport	26	0	0	1	1
GO:0015939_pantothenate_metabolic_process	7	0	0	1	1
GO:0015986_ATP_synthesis_coupled_proton_transport	13	0	0	1	1
GO:0016024_CDP-diacylglycerol_biosynthetic_process	13	0	0	1	1
GO:0016042_lipid_catabolic_process	80	1.25	0.81	0.711017	1	PLD2
GO:0016045_detection_of_bacterium	12	0	0	1	1
GO:0016055_Wnt_signaling_pathway	191	1.57	1.02	0.564876	1	LMBR1L;CALCOCO1;RSPO3
GO:0016056_rhodopsin_mediated_signaling_pathway	11	0	0	1	1
GO:0016064_immunoglobulin_mediated_immune_response	13	0	0	1	1
GO:0016070_RNA_metabolic_process	46	2.17	1.42	0.509995	1	HNRNPL
GO:0016075_rRNA_catabolic_process	16	0	0	1	1
GO:0016082_synaptic_vesicle_priming	16	0	0	1	1
GO:0016126_sterol_biosynthetic_process	17	0	0	1	1
GO:0016188_synaptic_vesicle_maturation	11	0	0	1	1
GO:0016197_endosomal_transport	90	1.11	0.72	0.752619	1	EPS15
GO:0016233_telomere_capping	28	0	0	1	1
GO:0016239_positive_regulation_of_macroautophagy	33	0	0	1	1
GO:0016254_preassembly_of_GPI_anchor_in_ER_membrane	17	0	0	1	1
GO:0016255_attachment_of_GPI_anchor_to_protein	6	0	0	1	1
GO:0016264_gap_junction_assembly	8	0	0	1	1
GO:0016266_O-glycan_processing	59	0	0	1	1
GO:0016310_phosphorylation	98	1.02	0.66	0.781554	1	PIK3CB
GO:0016311_dephosphorylation	90	1.11	0.72	0.752619	1	PNKP
GO:0016322_neuron_remodeling	12	0	0	1	1
GO:0016331_morphogenesis_of_embryonic_epithelium	11	0	0	1	1
GO:0016339_calcium-dependent_cell-cell_adhesion_via_plasma_membrane_cell_adhesion_molecules	41	0	0	1	1
GO:0016477_cell_migration	232	1.72	1.12	0.4792	1	TNFAIP3;NFATC2;EPHB3;PIK3CB
GO:0016485_protein_processing	56	1.79	1.16	0.580452	1	PCSK7
GO:0016525_negative_regulation_of_angiogenesis	128	1.56	1.02	0.587953	1	CXCL10;SEMA4A
GO:0016554_cytidine_to_uridine_editing	12	0	0	1	1
GO:0016559_peroxisome_fission	9	0	0	1	1
GO:0016572_histone_phosphorylation	13	0	0	1	1
GO:0016573_histone_acetylation	46	0	0	1	1
GO:0016575_histone_deacetylation	38	2.63	1.73	0.445225	1	SIRT2
GO:0016584_nucleosome_positioning	14	0	0	1	1
GO:0016601_Rac_protein_signal_transduction	23	0	0	1	1
GO:0016926_protein_desumoylation	7	0	0	1	1
GO:0016973_poly(A)+_mRNA_export_from_nucleus	20	0	0	1	1
GO:0017015_regulation_of_transforming_growth_factor_beta_receptor_signaling_pathway	22	0	0	1	1
GO:0017121_plasma_membrane_phospholipid_scrambling	8	0	0	1	1
GO:0017144_drug_metabolic_process	26	0	0	1	1
GO:0017183_peptidyl-diphthamide_biosynthetic_process_from_peptidyl-histidine	7	0	0	1	1
GO:0018023_peptidyl-lysine_trimethylation	11	0	0	1	1
GO:0018026_peptidyl-lysine_monomethylation	10	0	0	1	1
GO:0018095_protein_polyglutamylation	13	0	0	1	1
GO:0018107_peptidyl-threonine_phosphorylation	64	1.56	1.02	0.629466	1	CDK10
GO:0018108_peptidyl-tyrosine_phosphorylation	123	1.63	1.06	0.566268	1	EPHB3;DDR2
GO:0018146_keratan_sulfate_biosynthetic_process	28	0	0	1	1
GO:0018149_peptide_cross-linking	27	0	0	1	1
GO:0018242_protein_O-linked_glycosylation_via_serine	10	0	0	1	1
GO:0018298_protein-chromophore_linkage	14	0	0	1	1
GO:0018344_protein_geranylgeranylation	6	0	0	1	1
GO:0019058_viral_life_cycle	30	0	0	1	1
GO:0019068_virion_assembly	12	0	0	1	1
GO:0019083_viral_transcription	109	1.83	1.2	0.501288	1	AAAS;NUP210
GO:0019216_regulation_of_lipid_metabolic_process	92	1.09	0.7	0.760192	1	ID2
GO:0019222_regulation_of_metabolic_process	20	0	0	1	1
GO:0019226_transmission_of_nerve_impulse	19	0	0	1	1
GO:0019228_neuronal_action_potential	29	0	0	1	1
GO:0019229_regulation_of_vasoconstriction	16	0	0	1	1
GO:0019367_fatty_acid_elongation,_saturated_fatty_acid	7	0	0	1	1
GO:0019369_arachidonic_acid_metabolic_process	30	0	0	1	1
GO:0019370_leukotriene_biosynthetic_process	11	0	0	1	1
GO:0019371_cyclooxygenase_pathway	11	0	0	1	1
GO:0019372_lipoxygenase_pathway	16	0	0	1	1
GO:0019373_epoxygenase_P450_pathway	20	0	0	1	1
GO:0019395_fatty_acid_oxidation	15	0	0	1	1
GO:0019430_removal_of_superoxide_radicals	13	0	0	1	1
GO:0019432_triglyceride_biosynthetic_process	18	0	0	1	1
GO:0019433_triglyceride_catabolic_process	27	0	0	1	1
GO:0019441_tryptophan_catabolic_process_to_kynurenine	5	0	0	1	1
GO:0019509_L-methionine_salvage_from_methylthioadenosine	5	0	0	1	1
GO:0019674_NAD_metabolic_process	16	0	0	1	1
GO:0019730_antimicrobial_humoral_response	55	1.82	1.19	0.573887	1	AZU1
GO:0019731_antibacterial_humoral_response	44	2.27	1.49	0.494547	1	PLA2G6
GO:0019835_cytolysis	18	0	0	1	1
GO:0019852_L-ascorbic_acid_metabolic_process	9	0	0	1	1
GO:0019885_antigen_processing_and_presentation_of_endogenous_peptide_antigen_via_MHC_class_I	9	0	0	1	1
GO:0019985_translesion_synthesis	35	0	0	1	1
GO:0021510_spinal_cord_development	32	0	0	1	1
GO:0021527_spinal_cord_association_neuron_differentiation	13	0	0	1	1
GO:0021542_dentate_gyrus_development	16	0	0	1	1
GO:0021549_cerebellum_development	48	2.08	1.36	0.524973	1	CNTN1
GO:0021670_lateral_ventricle_development	12	0	0	1	1
GO:0021702_cerebellar_Purkinje_cell_differentiation	12	0	0	1	1
GO:0021794_thalamus_development	12	0	0	1	1
GO:0021819_layer_formation_in_cerebral_cortex	11	0	0	1	1
GO:0021846_cell_proliferation_in_forebrain	12	0	0	1	1
GO:0021854_hypothalamus_development	12	0	0	1	1
GO:0022400_regulation_of_rhodopsin_mediated_signaling_pathway	26	0	0	1	1
GO:0022408_negative_regulation_of_cell-cell_adhesion	15	0	0	1	1
GO:0022409_positive_regulation_of_cell-cell_adhesion	18	0	0	1	1
GO:0022604_regulation_of_cell_morphogenesis	24	0	0	1	1
GO:0022617_extracellular_matrix_disassembly	64	0	0	1	1
GO:0022900_electron_transport_chain	68	0	0	1	1
GO:0022904_respiratory_electron_transport_chain	17	0	0	1	1
GO:0023014_signal_transduction_by_protein_phosphorylation	19	0	0	1	1
GO:0030007_cellular_potassium_ion_homeostasis	14	0	0	1	1
GO:0030010_establishment_of_cell_polarity	35	2.86	1.89	0.418792	1	HSP90AA1
GO:0030031_cell_projection_assembly	23	0	0	1	1
GO:0030032_lamellipodium_assembly	33	3.03	2	0.400476	1	SH2B1
GO:0030033_microvillus_assembly	11	0	0	1	1
GO:0030041_actin_filament_polymerization	33	0	0	1	1
GO:0030048_actin_filament-based_movement	18	0	0	1	1
GO:0030049_muscle_filament_sliding	38	0	0	1	1
GO:0030050_vesicle_transport_along_actin_filament	19	0	0	1	1
GO:0030073_insulin_secretion	33	3.03	2	0.400476	1	STX1A
GO:0030097_hemopoiesis	53	1.89	1.23	0.560449	1	TTC7A
GO:0030099_myeloid_cell_differentiation	18	0	0	1	1
GO:0030101_natural_killer_cell_activation	22	0	0	1	1
GO:0030148_sphingolipid_biosynthetic_process	52	0	0	1	1
GO:0030150_protein_import_into_mitochondrial_matrix	19	0	0	1	1
GO:0030154_cell_differentiation	590	1.53	0.99	0.556322	1	CBX2;FSTL5;ID4;NHLH1;ID2;FXR1;RAF1;ANKRD49;PRMT7
GO:0030162_regulation_of_proteolysis	12	0	0	1	1
GO:0030163_protein_catabolic_process	26	0	0	1	1
GO:0030166_proteoglycan_biosynthetic_process	18	0	0	1	1
GO:0030178_negative_regulation_of_Wnt_signaling_pathway	47	0	0	1	1
GO:0030182_neuron_differentiation	152	0.66	0.42	0.905754	1	MBD1
GO:0030194_positive_regulation_of_blood_coagulation	14	0	0	1	1
GO:0030195_negative_regulation_of_blood_coagulation	13	0	0	1	1
GO:0030207_chondroitin_sulfate_catabolic_process	14	0	0	1	1
GO:0030212_hyaluronan_metabolic_process	11	0	0	1	1
GO:0030218_erythrocyte_differentiation	48	0	0	1	1
GO:0030224_monocyte_differentiation	17	0	0	1	1
GO:0030225_macrophage_differentiation	22	0	0	1	1
GO:0030238_male_sex_determination	12	0	0	1	1
GO:0030239_myofibril_assembly	13	0	0	1	1
GO:0030261_chromosome_condensation	19	0	0	1	1
GO:0030277_maintenance_of_gastrointestinal_epithelium	15	0	0	1	1
GO:0030278_regulation_of_ossification	12	0	0	1	1
GO:0030279_negative_regulation_of_ossification	19	0	0	1	1
GO:0030282_bone_mineralization	45	0	0	1	1
GO:0030301_cholesterol_transport	19	0	0	1	1
GO:0030307_positive_regulation_of_cell_growth	81	1.23	0.8	0.715473	1	KLHL22
GO:0030308_negative_regulation_of_cell_growth	126	1.59	1.03	0.579377	1	HSPA1A;HYAL2
GO:0030316_osteoclast_differentiation	31	0	0	1	1
GO:0030322_stabilization_of_membrane_potential	17	0	0	1	1
GO:0030324_lung_development	83	1.2	0.78	0.724181	1	BMPR1A
GO:0030325_adrenal_gland_development	21	0	0	1	1
GO:0030330_DNA_damage_response,_signal_transduction_by_p53_class_mediator	17	0	0	1	1
GO:0030334_regulation_of_cell_migration	100	2	1.31	0.456342	1	SLK;PAX6
GO:0030336_negative_regulation_of_cell_migration	149	1.34	0.87	0.670177	1	THY1;SRF
GO:0030388_fructose_1,6-bisphosphate_metabolic_process	9	0	0	1	1
GO:0030422_production_of_siRNA_involved_in_RNA_interference	11	0	0	1	1
GO:0030431_sleep	12	0	0	1	1
GO:0030449_regulation_of_complement_activation	48	0	0	1	1
GO:0030488_tRNA_methylation	33	0	0	1	1
GO:0030502_negative_regulation_of_bone_mineralization	17	0	0	1	1
GO:0030511_positive_regulation_of_transforming_growth_factor_beta_receptor_signaling_pathway	30	0	0	1	1
GO:0030512_negative_regulation_of_transforming_growth_factor_beta_receptor_signaling_pathway	83	1.2	0.78	0.724181	1	HSPA1A
GO:0030514_negative_regulation_of_BMP_signaling_pathway	50	2	1.31	0.539494	1	LEMD2
GO:0030516_regulation_of_axon_extension	14	0	0	1	1
GO:0030520_intracellular_estrogen_receptor_signaling_pathway	21	0	0	1	1
GO:0030521_androgen_receptor_signaling_pathway	19	0	0	1	1
GO:0030539_male_genitalia_development	19	0	0	1	1
GO:0030574_collagen_catabolic_process	43	0	0	1	1
GO:0030857_negative_regulation_of_epithelial_cell_differentiation	11	0	0	1	1
GO:0030865_cortical_cytoskeleton_organization	19	0	0	1	1
GO:0030866_cortical_actin_cytoskeleton_organization	29	0	0	1	1
GO:0030889_negative_regulation_of_B_cell_proliferation	17	0	0	1	1
GO:0030890_positive_regulation_of_B_cell_proliferation	41	2.44	1.6	0.470458	1	NFATC2
GO:0030901_midbrain_development	29	0	0	1	1
GO:0030948_negative_regulation_of_vascular_endothelial_growth_factor_receptor_signaling_pathway	14	0	0	1	1
GO:0030949_positive_regulation_of_vascular_endothelial_growth_factor_receptor_signaling_pathway	17	0	0	1	1
GO:0030968_endoplasmic_reticulum_unfolded_protein_response	49	0	0	1	1
GO:0030970_retrograde_protein_transport,_ER_to_cytosol	15	0	0	1	1
GO:0031016_pancreas_development	24	0	0	1	1
GO:0031018_endocrine_pancreas_development	24	0	0	1	1
GO:0031023_microtubule_organizing_center_organization	9	0	0	1	1
GO:0031032_actomyosin_structure_organization	31	0	0	1	1
GO:0031047_gene_silencing_by_RNA	35	0	0	1	1
GO:0031054_pre-miRNA_processing	14	0	0	1	1
GO:0031065_positive_regulation_of_histone_deacetylation	11	0	0	1	1
GO:0031069_hair_follicle_morphogenesis	28	0	0	1	1
GO:0031076_embryonic_camera-type_eye_development	12	0	0	1	1
GO:0031098_stress-activated_protein_kinase_signaling_cascade	20	0	0	1	1
GO:0031103_axon_regeneration	16	0	0	1	1
GO:0031110_regulation_of_microtubule_polymerization_or_depolymerization	18	0	0	1	1
GO:0031115_negative_regulation_of_microtubule_polymerization	13	0	0	1	1
GO:0031116_positive_regulation_of_microtubule_polymerization	26	0	0	1	1
GO:0031122_cytoplasmic_microtubule_organization	50	2	1.31	0.539494	1	SLK
GO:0031146_SCF-dependent_proteasomal_ubiquitin-dependent_protein_catabolic_process	92	0	0	1	1
GO:0031167_rRNA_methylation	17	0	0	1	1
GO:0031284_positive_regulation_of_guanylate_cyclase_activity	10	0	0	1	1
GO:0031295_T_cell_costimulation	53	0	0	1	1
GO:0031333_negative_regulation_of_protein-containing_complex_assembly	36	2.78	1.83	0.42774	1	RAF1
GO:0031334_positive_regulation_of_protein-containing_complex_assembly	54	0	0	1	1
GO:0031424_keratinization	179	0	0	1	1
GO:0031529_ruffle_organization	14	0	0	1	1
GO:0031532_actin_cytoskeleton_reorganization	57	0	0	1	1
GO:0031581_hemidesmosome_assembly	12	0	0	1	1
GO:0031589_cell-substrate_adhesion	19	0	0	1	1
GO:0031623_receptor_internalization	42	2.38	1.56	0.478612	1	CXCL8
GO:0031638_zymogen_activation	21	0	0	1	1
GO:0031639_plasminogen_activation	11	0	0	1	1
GO:0031640_killing_of_cells_of_other_organism	37	0	0	1	1
GO:0031643_positive_regulation_of_myelination	19	0	0	1	1
GO:0031665_negative_regulation_of_lipopolysaccharide-mediated_signaling_pathway	11	0	0	1	1
GO:0031668_cellular_response_to_extracellular_stimulus	19	0	0	1	1
GO:0031929_TOR_signaling	19	0	0	1	1
GO:0031936_negative_regulation_of_chromatin_silencing	13	0	0	1	1
GO:0031953_negative_regulation_of_protein_autophosphorylation	12	0	0	1	1
GO:0031954_positive_regulation_of_protein_autophosphorylation	24	0	0	1	1
GO:0032000_positive_regulation_of_fatty_acid_beta-oxidation	10	0	0	1	1
GO:0032006_regulation_of_TOR_signaling	20	0	0	1	1
GO:0032007_negative_regulation_of_TOR_signaling	31	0	0	1	1
GO:0032008_positive_regulation_of_TOR_signaling	34	0	0	1	1
GO:0032020_ISG15-protein_conjugation	6	0	0	1	1
GO:0032024_positive_regulation_of_insulin_secretion	42	0	0	1	1
GO:0032060_bleb_assembly	10	0	0	1	1
GO:0032092_positive_regulation_of_protein_binding	70	1.43	0.93	0.662439	1	HIP1R
GO:0032094_response_to_food	21	0	0	1	1
GO:0032099_negative_regulation_of_appetite	10	0	0	1	1
GO:0032147_activation_of_protein_kinase_activity	67	0	0	1	1
GO:0032148_activation_of_protein_kinase_B_activity	34	0	0	1	1
GO:0032200_telomere_organization	27	0	0	1	1
GO:0032204_regulation_of_telomere_maintenance	12	0	0	1	1
GO:0032211_negative_regulation_of_telomere_maintenance_via_telomerase	20	0	0	1	1
GO:0032228_regulation_of_synaptic_transmission,_GABAergic	15	0	0	1	1
GO:0032233_positive_regulation_of_actin_filament_bundle_assembly	13	0	0	1	1
GO:0032330_regulation_of_chondrocyte_differentiation	10	0	0	1	1
GO:0032331_negative_regulation_of_chondrocyte_differentiation	21	0	0	1	1
GO:0032367_intracellular_cholesterol_transport	11	0	0	1	1
GO:0032402_melanosome_transport	21	0	0	1	1
GO:0032435_negative_regulation_of_proteasomal_ubiquitin-dependent_protein_catabolic_process	32	0	0	1	1
GO:0032438_melanosome_organization	23	0	0	1	1
GO:0032446_protein_modification_by_small_protein_conjugation	11	0	0	1	1
GO:0032469_endoplasmic_reticulum_calcium_ion_homeostasis	17	0	0	1	1
GO:0032479_regulation_of_type_I_interferon_production	13	0	0	1	1
GO:0032482_Rab_protein_signal_transduction	14	0	0	1	1
GO:0032486_Rap_protein_signal_transduction	10	0	0	1	1
GO:0032502_developmental_process	28	0	0	1	1
GO:0032509_endosome_transport_via_multivesicular_body_sorting_pathway	13	0	0	1	1
GO:0032511_late_endosome_to_vacuole_transport_via_multivesicular_body_sorting_pathway	11	0	0	1	1
GO:0032515_negative_regulation_of_phosphoprotein_phosphatase_activity	50	0	0	1	1
GO:0032525_somite_rostral/caudal_axis_specification	12	0	0	1	1
GO:0032526_response_to_retinoic_acid	44	0	0	1	1
GO:0032635_interleukin-6_production	13	0	0	1	1
GO:0032675_regulation_of_interleukin-6_production	10	0	0	1	1
GO:0032689_negative_regulation_of_interferon-gamma_production	38	0	0	1	1
GO:0032691_negative_regulation_of_interleukin-1_beta_production	39	2.56	1.69	0.453767	1	TNFAIP3
GO:0032693_negative_regulation_of_interleukin-10_production	23	0	0	1	1
GO:0032695_negative_regulation_of_interleukin-12_production	17	0	0	1	1
GO:0032700_negative_regulation_of_interleukin-17_production	22	0	0	1	1
GO:0032715_negative_regulation_of_interleukin-6_production	66	1.52	0.99	0.640799	1	TNFAIP3
GO:0032717_negative_regulation_of_interleukin-8_production	37	2.7	1.78	0.43655	1	MAPKBP1
GO:0032720_negative_regulation_of_tumor_necrosis_factor_production	55	1.82	1.19	0.573887	1	TNFAIP3
GO:0032722_positive_regulation_of_chemokine_production	19	0	0	1	1
GO:0032725_positive_regulation_of_granulocyte_macrophage_colony-stimulating_factor_production	11	0	0	1	1
GO:0032728_positive_regulation_of_interferon-beta_production	30	0	0	1	1
GO:0032731_positive_regulation_of_interleukin-1_beta_production	53	1.89	1.23	0.560449	1	AZU1
GO:0032733_positive_regulation_of_interleukin-10_production	38	2.63	1.73	0.445225	1	HSPD1
GO:0032735_positive_regulation_of_interleukin-12_production	35	2.86	1.89	0.418792	1	HSPD1
GO:0032736_positive_regulation_of_interleukin-13_production	12	0	0	1	1
GO:0032740_positive_regulation_of_interleukin-17_production	18	0	0	1	1
GO:0032743_positive_regulation_of_interleukin-2_production	26	0	0	1	1
GO:0032753_positive_regulation_of_interleukin-4_production	24	0	0	1	1
GO:0032754_positive_regulation_of_interleukin-5_production	11	0	0	1	1
GO:0032760_positive_regulation_of_tumor_necrosis_factor_production	50	0	0	1	1
GO:0032780_negative_regulation_of_ATPase_activity	12	0	0	1	1
GO:0032784_regulation_of_DNA-templated_transcription,_elongation	9	0	0	1	1
GO:0032786_positive_regulation_of_DNA-templated_transcription,_elongation	16	0	0	1	1
GO:0032801_receptor_catabolic_process	13	0	0	1	1
GO:0032802_low-density_lipoprotein_particle_receptor_catabolic_process	10	0	0	1	1
GO:0032836_glomerular_basement_membrane_development	9	0	0	1	1
GO:0032869_cellular_response_to_insulin_stimulus	100	1	0.65	0.788244	1	CDK4
GO:0032874_positive_regulation_of_stress-activated_MAPK_cascade	18	0	0	1	1
GO:0032880_regulation_of_protein_localization	59	0	0	1	1
GO:0032886_regulation_of_microtubule-based_process	9	0	0	1	1
GO:0032897_negative_regulation_of_viral_transcription	13	0	0	1	1
GO:0032924_activin_receptor_signaling_pathway	19	0	0	1	1
GO:0032926_negative_regulation_of_activin_receptor_signaling_pathway	8	0	0	1	1
GO:0032933_SREBP_signaling_pathway	9	0	0	1	1
GO:0032958_inositol_phosphate_biosynthetic_process	11	0	0	1	1
GO:0032966_negative_regulation_of_collagen_biosynthetic_process	17	0	0	1	1
GO:0032967_positive_regulation_of_collagen_biosynthetic_process	26	0	0	1	1
GO:0032968_positive_regulation_of_transcription_elongation_from_RNA_polymerase_II_promoter	13	0	0	1	1
GO:0032981_mitochondrial_respiratory_chain_complex_I_assembly	65	1.54	1	0.635177	1	ACAD9
GO:0033137_negative_regulation_of_peptidyl-serine_phosphorylation	27	0	0	1	1
GO:0033138_positive_regulation_of_peptidyl-serine_phosphorylation	90	2.22	1.46	0.403786	1	HSP90AA1;RAF1
GO:0033141_positive_regulation_of_peptidyl-serine_phosphorylation_of_STAT_protein	20	0	0	1	1
GO:0033146_regulation_of_intracellular_estrogen_receptor_signaling_pathway	15	0	0	1	1
GO:0033147_negative_regulation_of_intracellular_estrogen_receptor_signaling_pathway	13	0	0	1	1
GO:0033148_positive_regulation_of_intracellular_estrogen_receptor_signaling_pathway	11	0	0	1	1
GO:0033151_V(D)J_recombination	8	0	0	1	1
GO:0033169_histone_H3-K9_demethylation	14	0	0	1	1
GO:0033189_response_to_vitamin_A	19	0	0	1	1
GO:0033210_leptin-mediated_signaling_pathway	8	0	0	1	1
GO:0033314_mitotic_DNA_replication_checkpoint	10	0	0	1	1
GO:0033327_Leydig_cell_differentiation	11	0	0	1	1
GO:0033344_cholesterol_efflux	23	0	0	1	1
GO:0033540_fatty_acid_beta-oxidation_using_acyl-CoA_oxidase	15	0	0	1	1
GO:0033572_transferrin_transport	36	0	0	1	1
GO:0033617_mitochondrial_cytochrome_c_oxidase_assembly	22	0	0	1	1
GO:0033619_membrane_protein_proteolysis	12	0	0	1	1
GO:0033622_integrin_activation	9	0	0	1	1
GO:0033628_regulation_of_cell_adhesion_mediated_by_integrin	13	0	0	1	1
GO:0033630_positive_regulation_of_cell_adhesion_mediated_by_integrin	15	0	0	1	1
GO:0033673_negative_regulation_of_kinase_activity	13	0	0	1	1
GO:0033683_nucleotide-excision_repair,_DNA_incision	38	0	0	1	1
GO:0033689_negative_regulation_of_osteoblast_proliferation	15	0	0	1	1
GO:0033690_positive_regulation_of_osteoblast_proliferation	12	0	0	1	1
[truncated: 907 more rows]

## Sheet: CC_24hrs - ORA_T4Mt24_vs_NIt24-
ORA_T4Mt24_vs_NIt24-CC_all
geneset	NGenes	pctDE	OR	pvalue	FDR	external_gene_name.DE
GO:0005654_nucleoplasm	3680	3.51	2.93	1.89325e-20	1.19275e-17	HSPH1;RELB;NFATC2;NFKBIA;ATF3;CBX2;MCM5;TCIM;XRCC3;FANCG;PHF19;HSPA1A;E2F1;MCM3;ILF3;HSP90AA1;DGCR8;UHRF1;FANCA;CRTC2;QSOX2;MAPKBP1;NFKB2;BIRC3;MAU2;FAM193B;CDC25B;USP21;MDM2;HSPA8;PKMYT1;DDX11;GGA1;FUS;MCM2;APEX2;CENPO;PPIL2;TONSL;E2F2;PLK1;XRCC1;PRRX1;KIF18B;TRMU;PNKP;STAT5B;SF3B4;METTL22;HDAC7;GINS2;SRRT;ID4;PYGO2;UBQLN4;PPP5C;CHAF1B;DNAJB1;CPSF4;PATZ1;NCAPH2;CENPT;MAPK12;GTSE1;MCM7;RAD54L;TAF…
GO:0005829_cytosol	5138	2.96	2.51	1.94049e-17	6.11253e-15	DYNLL2;DYNLL1;TNFAIP3;NAMPT;HSPH1;RELB;NFATC2;NFKBIA;MCM5;ACSBG1;TCIM;PASK;XRCC3;FANCG;HSPA4L;RNF19A;NAGK;HSPA1A;MICAL1;CDAN1;KLHL22;HSP90AA1;DDX6;NFKB2;BIRC3;CDC25B;CA2;USP21;MDM2;ACACB;HSPA8;PKMYT1;EXOC3;DNAJA1;GGA1;SFI1;CENPO;NBEAL2;CACNB3;AKAP1;KIF22;PLK1;PRRX1;PDE2A;HAUS5;KIF18B;CDCA3;STAT5B;RMND5B;HDAC7;WDR62;THY1;PXN;WDR45;EXOC7;SH2B1;CNTROB;ARHGAP44;OSBPL7;UBQLN4;PPP5C;IFIT5;CHAF1B;DNAJB1…
GO:0005634_nucleus	5127	2.83	2.33	8.28189e-15	1.7392e-12	DYNLL2;DYNLL1;TNFAIP3;HSPH1;RELB;NFATC2;NFKBIA;ATF3;CBX2;MCM5;TCIM;PASK;XRCC3;HSPA4L;PHF19;HSPA1A;CDAN1;E2F1;KLHL22;MCM3;ILF3;HSP90AA1;DGCR8;UHRF1;FANCA;CRTC2;DDX6;NFKB2;BIRC3;TUBB;DNAJC17;MAU2;FAM193B;CDC25B;MDM2;KIFC1;ACACB;HSPA8;PKMYT1;DDX11;DNAJA1;FUS;MCM2;APEX2;PPIL2;E2F2;KIF22;PLK1;XRCC1;PDE2A;KIF18B;PNKP;STAT5B;SF3B4;RMND5B;METTL22;HDAC7;WDR62;TEKT1;CDK10;ID4;SH2B1;IPO13;UBQLN4;PPP5C;ACAD9…
GO:0005737_cytoplasm	4690	2.75	2.18	4.3178e-12	6.80054e-10	DYNLL1;TNFAIP3;HSPH1;NFATC2;NFKBIA;ACSBG1;TCIM;PASK;XRCC3;HSPA4L;RNF19A;HSPA1A;MICAL1;CDAN1;KLHL22;ILF3;HSP90AA1;DGCR8;FANCA;CRTC2;MAPKBP1;DDX6;NFKB2;ARRDC3;BIRC3;TUBB;DNAJC17;FAM193B;CDC25B;RNF220;CA2;USP21;MDM2;HSPA8;DDX11;MCM2;PPIL2;TONSL;PLK1;PDE2A;KIF18B;STAT5B;RMND5B;HDAC7;TEKT1;CDK10;SRRT;ID4;IPO13;UBQLN4;CHAF1B;DNAJB1;NAA40;TUBA1B;ARRDC4;WDR6;ARHGEF1;TACC3;AIF1L;CORO2B;NFATC2IP;MAPK12;ACT…
GO:0042555_MCM_complex	12	50	64.89	1.08856e-08	1.37158e-06	MCM5;MCM3;MCM2;TONSL;MCM7;MCM4
GO:0016020_membrane	2109	2.84	2.02	2.75743e-06	0.00028953	DYNLL2;DYNLL1;ICAM1;MCM5;MCM3;ILF3;HSP90AA1;DDX6;CNNM3;KIFC1;HSPA8;PKMYT1;DNAJA1;ABCF3;GGA1;NBEAL2;CACNB3;AKAP1;LSS;PNKP;CNTN1;SEMA4F;SLC26A6;IL6ST;EXOC7;OSBPL7;P4HA1;SCARB2;CORO2B;NCAPH2;PCSK7;GTSE1;MCM7;EPS15;MCM4;ATG9A;AAAS;CCDC134;FXR1;SNX4;ADCY3;TMEM120B;ILK;NUP210;LEMD2;MAN1B1;EHBP1L1;HNRNPL;SEMA7A;SLC16A6;VMP1;DNAJC3;MMS19;HID1;PIK3CB;CYB5D2;ABCC10;HSPD1;CYTH2;BIN1
GO:0005739_mitochondrion	1266	3.24	2.27	6.34609e-06	0.000571148	DYNLL1;XRCC3;FANCG;HSPA1A;E2F1;ILF3;HSP90AA1;DDX6;POLG;ACACB;OGDHL;DNAJA1;APEX2;AKAP1;TRMU;PNKP;ACAD9;P4HA1;MAPK12;MUTYH;HIP1R;SIRT2;DELE1;IDH3G;PMPCA;ACADVL;PLA2G6;RAF1;SPG7;TSPOAP1;MTIF2;PISD;ATP2A1;MRPS2;VARS2;RRM2B;SFXN5;MRPL50;HSPD1;NIPSNAP3A;TFDP1
GO:0032991_protein-containing_complex	644	4.04	2.81	8.90901e-06	0.000701584	HSPH1;RELB;HSPA1A;E2F1;HSP90AA1;BIRC3;POLG;TUBB;MDM2;GGA1;METTL22;SRRT;UBQLN4;PPP5C;CHAF1B;AIF1L;CHAF1A;ACTA2;RAD54L;ID2;UBQLN1;SNX4;ILK;MAPK6;BTBD1;HSPD1
GO:0005813_centrosome	506	4.35	3.02	1.42593e-05	0.000998149	DYNLL2;DYNLL1;RELB;RNF19A;HSPA1A;E2F1;KLHL22;MCM3;CDC25B;DDX11;SFI1;PLK1;HAUS5;WDR62;CNTROB;CEP72;AAAS;SIRT2;PLEKHA7;POC1A;IFT57;WRAP73
GO:0005886_plasma_membrane	4416	2.22	1.59	7.70168e-05	0.00485206	DYNLL2;DYNLL1;VCAM1;NAMPT;NFKBIA;ICAM1;ACSBG1;TCIM;FANCG;SELE;F2RL1;HSPA1A;MICAL1;CDAN1;ITGA7;HSP90AA1;QSOX2;ARRDC3;CNNM3;CA2;USP21;MDM2;HSPA8;SEPT5;STK32A;NBEAL2;CACNB3;PPIL2;ADAM11;PDE2A;TJAP1;SEMA4F;SLC26A6;SLC7A11;THY1;PXN;IL6ST;EXOC7;SH2B1;OSBPL7;LMBR1L;PPP5C;IFIT5;ARRDC4;EPHB3;WDR6;GGT7;ARHGEF1;DOK3;SCARB2;DDR2;GPR162;ARHGEF25;EDNRA;EPS15;GBA2;SLC41A3;IGSF9;HIP1R;SIRT2;UBQLN1;ZMAT3;CLDN15;P…
GO:0072686_mitotic_spindle	100	8	5.66	0.000158276	0.00906488	DYNLL1;KLHL22;KIFC1;KIF22;TACC3;AAAS;SIRT2;WRAP73
GO:0005730_nucleolus	1245	2.89	1.99	0.000230057	0.0111489	ATF3;TCIM;FANCG;ILF3;DGCR8;MAPKBP1;DDX6;FAM193B;MDM2;HSPA8;PKMYT1;DDX11;XRCC1;PNKP;SF3B4;METTL22;RETREG1;DNAJB1;TAF1C;PIMREG;VRK3;SIRT2;IDH3G;ZMAT3;ACADVL;FXR1;MAK16;ZNF692;MYCN;NSUN5P2;VMP1;SLC29A2;PIK3CB;CDK4;TSEN54;NPM3
GO:0008180_COP9_signalosome	36	13.89	10.44	0.000213471	0.0111489	DYNLL1;HSPA1A;WDR6;COPS7B;NCKIPSD
GO:0005874_microtubule	305	4.59	3.15	0.000297364	0.0133645	DYNLL2;DYNLL1;HSPH1;TUBB;KIFC1;KIF22;HAUS5;KIF18B;TEKT1;TUBA1B;GAS8;SIRT2;RASSF1;TUBB4B
GO:0045121_membrane_raft	236	5.08	3.5	0.000318203	0.0133645	ICAM1;SELE;BIRC3;TUBB;CNTN1;THY1;TUBA1B;BIRC2;AKAP5;HYAL2;HSPD1;EDNRB
GO:0000407_phagophore_assembly_site	23	17.39	13.6	0.000386809	0.0143347	WDR45;ULK3;ATG9A;VMP1
GO:0005814_centriole	143	6.29	4.37	0.000383158	0.0143347	HSPA1A;SFI1;PLK1;WDR62;CNTROB;SIRT2;WDR90;POC1A;WRAP73
GO:0000778_condensed_nuclear_chromosome_kinetochore	11	27.27	24.16	0.000543121	0.0190092	CENPO;CENPT;REC8
GO:0000922_spindle_pole	121	6.61	4.6	0.000579071	0.01901	CDC25B;DDX11;PLK1;WDR62;TACC3;AAAS;RASSF1;POC1A
GO:0043231_intracellular_membrane-bounded_organelle	791	3.16	2.16	0.000603494	0.01901	TNFAIP3;CNNM3;GGA1;APEX2;OSBPL7;PPP5C;P4HA1;CYP39A1;CALCOCO1;ARRDC4;CPSF4;TACC3;EPS15;VRK3;ATG9A;HIP1R;MAK16;AZU1;GPBP1;GRIPAP1;PIK3CB;SYT4;QSOX1;CC2D1B;SEC24D
GO:0005815_microtubule_organizing_center	96	7.29	5.11	0.000710843	0.0213253	KIFC1;EXOC7;RASSF1;TACC2;EHBP1L1;MMS19;WRAP73
GO:0000785_chromatin	126	6.35	4.41	0.000756505	0.0216017	MAU2;MCM2;KIF22;PLK1;MCM7;MYCN;LEMD2;CDK4
GO:0015630_microtubule_cytoskeleton	158	5.7	3.93	0.000788632	0.0216017	KLHL22;SEPT5;DNAJA1;MCM2;PLK1;TEKT1;TUBA1B;GTSE1;RASSF1
GO:0043209_myelin_sheath	28	14.29	10.76	0.000841774	0.0220966	HSP90AA1;CA2;SIRT2;PLP1
GO:0005794_Golgi_apparatus	1002	2.89	1.98	0.000916784	0.023103	VCAM1;F2RL1;KLHL22;QSOX2;PKMYT1;EXOC3;GGA1;PDE2A;TJAP1;TANGO2;GGA3;GKAP1;DENND4B;SMPD4;B3GALT2;GAS8;SGSM1;RAF1;ADCY3;TEPSIN;MAN1B1;FGD3;IFT57;HID1;SLC35A4;QSOX1;ZDHHC22;HSPD1;NECAB3
GO:0048471_perinuclear_region_of_cytoplasm	702	3.13	2.13	0.00140581	0.0340639	XRCC3;SELE;HSPA1A;MCM3;HSP90AA1;DDX6;HSPA8;EXOC3;DNAJA1;FUS;PDE2A;UBQLN4;HIP1R;SIRT2;UBQLN1;FXR1;INF2;HNRNPL;SLK;CDK4;SYT4;HYAL2
GO:0005905_clathrin-coated_pit	59	8.47	5.99	0.00212417	0.049564	SELE;EPS15;HIP1R;FCHO1;HSPD1
GO:0000776_kinetochore	87	6.9	4.8	0.00225635	0.0503928	DYNLL1;KIF22;PLK1;ZNF276;CENPT;AURKB
GO:0030173_integral_component_of_Golgi_membrane	61	8.2	5.77	0.00246192	0.0503928	QSOX2;PCSK7;SLC35A4;SYT4;QSOX1
GO:0031143_pseudopodium	18	16.67	12.89	0.00247965	0.0503928	F2RL1;PLA2G6;RAF1
GO:0090575_RNA_polymerase_II_transcription_regulator_complex	61	8.2	5.77	0.00246192	0.0503928	E2F1;E2F2;MXD3;HYAL2;TFDP1
GO:0016235_aggresome	39	10.26	7.38	0.00296086	0.0582919	HSPA1A;EPS15;UBQLN1;DVL2
GO:0000784_nuclear_chromosome,_telomeric_region	124	5.65	3.88	0.00311702	0.0595068	MCM5;XRCC3;MCM3;MCM2;XRCC1;MCM7;MCM4
GO:0034451_centriolar_satellite	95	6.32	4.37	0.00350619	0.0649675	PLK1;WDR62;EXOC7;CEP72;TACC3;PLA2G6
GO:0098978_glutamatergic_synapse	355	3.66	2.48	0.00362604	0.0652688	DYNLL2;RNF19A;HSPA8;ARHGAP44;DNAJB1;EPS15;FXR1;TSPOAP1;GRIPAP1;STX1A;PSD2;RELA;SYT4
GO:0005868_cytoplasmic_dynein_complex	21	14.29	10.74	0.003906	0.068355	DYNLL2;DYNLL1;SNX4
GO:0005776_autophagosome	69	7.25	5.05	0.00420951	0.0716754	HSPA8;OSBPL7;UBQLN4;ATG9A;UBQLN1
GO:0097542_ciliary_tip	46	8.7	6.15	0.00540034	0.0895319	DYNLL2;DYNLL1;ULK3;IFT57
GO:0000790_nuclear_chromatin	1190	2.52	1.71	0.00579304	0.0927919	RELB;NFATC2;ATF3;E2F1;UHRF1;NFKB2;DDX11;E2F2;XRCC1;PRRX1;STAT5B;NHLH1;CHAF1B;CALCOCO1;CHAF1A;MXD4;NR4A3;HES5;MBD1;ZNF692;MYCN;REC8;MEIS3;RFX5;VSX2;SRF;RELA;MXD3;PAX6;TFDP1
GO:0030425_dendrite	420	3.33	2.25	0.00589155	0.0927919	HSPA8;SEMA4F;THY1;IL6ST;ARHGAP44;ACAD9;EPHB3;IGSF9;GRIPAP1;PSD2;PIAS3;BMPR1A;CYP46A1;SYT4
GO:0045177_apical_part_of_cell	76	6.58	4.55	0.0063436	0.0974748	VCAM1;CA2;SLC7A11;IFIT5;DVL2
GO:0000792_heterochromatin	27	11.11	8.05	0.00802554	0.120383	CBX2;UHRF1;DDX6
GO:0016604_nuclear_body	312	3.53	2.38	0.00936626	0.137227	MAU2;MDM2;CENPO;TONSL;KIF18B;SRRT;RETREG1;CENPT;SUGP2;UBE2O;DVL2
GO:0031965_nuclear_membrane	238	3.78	2.55	0.0117843	0.165654	QSOX2;AAAS;TEPSIN;NUP210;LEMD2;STX1A;SLC29A2;CDK4;EDNRB
GO:0035770_ribonucleoprotein_granule	11	18.18	14.3	0.0118324	0.165654	FXR1;HNRNPL
GO:0030496_midbody	161	4.35	2.94	0.0125145	0.171394	MICAL1;EXOC3;DDX11;PLK1;SIRT2;AURKB;PIK3CB
GO:0035578_azurophil_granule_lumen	91	5.49	3.76	0.0132647	0.177804	TUBB;AZU1;C6orf120;TUBB4B;DNAJC3
GO:0015629_actin_cytoskeleton	245	3.67	2.47	0.0140125	0.180716	MICAL1;IFIT5;AIF1L;CORO2B;ACTA2;DDR2;ACTG2;NPM3;BIN1
GO:0097449_astrocyte_projection	12	16.67	12.86	0.0140557	0.180716	SLC7A11;SYT4
GO:0098794_postsynapse	93	5.38	3.67	0.0144633	0.182238	DYNLL2;RNF19A;EPS15;PSD2;CYP46A1
GO:0000974_Prp19_complex	13	15.38	11.69	0.016444	0.196585	HSPA8;U2AF2
GO:0014069_postsynaptic_density	252	3.57	2.4	0.0165381	0.196585	DYNLL2;SEMA4F;ARHGAP44;DNAJB1;HIP1R;FXR1;PJA2;AKAP5;STX1A
GO:0101031_chaperone_complex	13	15.38	11.69	0.016444	0.196585	HSPA8;PPP5C
GO:0043240_Fanconi_anaemia_nuclear_complex	14	14.29	10.72	0.0189917	0.217541	FANCG;FANCA
GO:1990023_mitotic_spindle_midzone	14	14.29	10.72	0.0189917	0.217541	KIF18B;AURKB
GO:0030426_growth_cone	140	4.29	2.89	0.0214122	0.240888	EXOC3;GDPD5;THY1;SIRT2;FXR1;CYTH2
GO:0016607_nuclear_speck	400	3	2.01	0.0218422	0.241413	NAMPT;TCIM;HSPA1A;FAM193B;KIF22;BRD2;RAF1;MBD1;TEPSIN;CXXC1;PIAS3;U2AF2
GO:0005869_dynactin_complex	16	12.5	9.19	0.0245437	0.257709	ACTA2;ACTG2
GO:0045171_intercellular_bridge	71	5.63	3.85	0.0238749	0.257709	MICAL1;KLHL22;NCAPH2;QSOX1
GO:0071682_endocytic_vesicle_lumen	16	12.5	9.19	0.0245437	0.257709	HSPH1;HSP90AA1
GO:0005783_endoplasmic_reticulum	1022	2.35	1.57	0.0272465	0.275376	VCAM1;ACSBG1;HSPA1A;PKMYT1;NBEAL2;PDE2A;SEMA4F;SLC26A6;THY1;P4HA1;RETREG1;POMT1;SMPD4;UBQLN1;CCDC134;P3H3;LEMD2;MAN1B1;VMP1;DNAJC3;CYP46A1;ZDHHC22;HYAL2;NECAB3
GO:0043194_axon_initial_segment	17	11.76	8.57	0.0275376	0.275376	TRIM46;BIN1
GO:0097038_perinuclear_endoplasmic_reticulum	17	11.76	8.57	0.0275376	0.275376	GDPD5;OSBPL7
GO:0000780_condensed_nuclear_chromosome,_centromeric_region	18	11.11	8.04	0.0306698	0.301906	AURKB;REC8
GO:1990904_ribonucleoprotein_complex	154	3.9	2.62	0.0321516	0.311623	NFATC2;HSPA1A;ILF3;HSPA8;HNRNPL;JRK
GO:0000145_exocyst	19	10.53	7.57	0.0339355	0.314403	EXOC3;EXOC7
GO:0031362_anchored_component_of_external_side_of_plasma_membrane	19	10.53	7.57	0.0339355	0.314403	THY1;HYAL2
GO:0043034_costamere	19	10.53	7.57	0.0339355	0.314403	FXR1;ILK
GO:0005637_nuclear_inner_membrane	48	6.25	4.29	0.0375036	0.337532	TMEM120B;FAM169A;LEMD2
GO:0005871_kinesin_complex	48	6.25	4.29	0.0375036	0.337532	KIFC1;KIF22;KIF18B
GO:0005819_spindle	122	4.1	2.76	0.04046	0.359012	PLK1;HAUS5;SIRT2;AURKB;MMS19
GO:0005720_nuclear_heterochromatin	22	9.09	6.43	0.0444858	0.383919	UHRF1;SIRT2
GO:0005942_phosphatidylinositol_3-kinase_complex	22	9.09	6.43	0.0444858	0.383919	SOCS2;PIK3CB
GO:0009897_external_side_of_plasma_membrane	303	2.97	1.98	0.0457411	0.389418	VCAM1;CXCL10;ICAM1;THY1;IL6ST;CD276;AQP4;SEMA7A;BMPR1A
GO:0043195_terminal_bouton	54	5.56	3.79	0.0503244	0.422725	POLG;HSPA8;ILK
GO:0030286_dynein_complex	25	8	5.59	0.0560706	0.458759	DYNLL2;DYNLL1
GO:0051233_spindle_midzone	25	8	5.59	0.0560706	0.458759	PLK1;AURKB
GO:0005925_focal_adhesion	415	2.65	1.76	0.0574711	0.464189	ICAM1;HSPA1A;HSPA8;THY1;PXN;AIF1L;SCARB2;CORO2B;DDR2;ILK;DIXDC1
GO:0005789_endoplasmic_reticulum_membrane	944	2.22	1.48	0.059376	0.467586	PKMYT1;LSS;SCARA3;OSBPL7;UBQLN4;LMBR1L;CYP39A1;SCARB2;POMT1;ABCD4;SMPD4;ATG9A;PLD2;PJA2;NUP210;MAN1B1;ATP2A1;CYP46A1;UBE2J1;NECAB3;SEC24D
GO:0032587_ruffle_membrane	95	4.21	2.83	0.0590271	0.467586	IFIT5;AIF1L;HIP1R;PSD2
GO:0005657_replication_fork	26	7.69	5.36	0.0601419	0.46777	XRCC3;UHRF1
GO:0005790_smooth_endoplasmic_reticulum	27	7.41	5.14	0.0643112	0.487395	GBA2;DNAJC3
GO:0005881_cytoplasmic_microtubule	60	5	3.39	0.064986	0.487395	TUBA1B;GTSE1;HID1
GO:0101003_ficolin-1-rich_granule_membrane	60	5	3.39	0.064986	0.487395	DYNLL1;NBEAL2;DOK3
GO:0000795_synaptonemal_complex	28	7.14	4.94	0.0685746	0.490932	PLK1;REC8
GO:0032039_integrator_complex	28	7.14	4.94	0.0685746	0.490932	INTS3;INTS9
GO:0043025_neuronal_cell_body	377	2.65	1.76	0.0676889	0.490932	HSP90AA1;GDPD5;IL6ST;DNAJB1;HIP1R;FXR1;ILK;PSD2;BMPR1A;SYT4
GO:0097060_synaptic_membrane	28	7.14	4.94	0.0685746	0.490932	PDE2A;HIP1R
GO:0032590_dendrite_membrane	30	6.67	4.59	0.0773681	0.547662	THY1;AKAP5
GO:0042734_presynaptic_membrane	67	4.48	3.02	0.0842585	0.58981	EXOC3;PDE2A;STX1A
GO:0019898_extrinsic_component_of_membrane	68	4.41	2.97	0.0871904	0.595181	WDR45;GBA2;AZU1
GO:0036064_ciliary_basal_body	153	3.27	2.18	0.08786	0.595181	CDK10;GAS8;POC1A;IFT57;WRAP73
GO:0098793_presynapse	109	3.67	2.45	0.0877008	0.595181	PLD2;FXR1;SLC29A2;CYP46A1
GO:0005743_mitochondrial_inner_membrane	400	2.5	1.66	0.0914125	0.612659	PDE2A;SLC25A39;ACAD9;DELE1;PMPCA;ACADVL;SPG7;MRPS2;MRPL50;HSPD1
GO:0005902_microvillus	70	4.29	2.88	0.0931814	0.61794	VCAM1;CA2;HYAL2
GO:0030285_integral_component_of_synaptic_vesicle_membrane	34	5.88	4.02	0.09592	0.629475	STX1A;SYT4
GO:0031901_early_endosome_membrane	158	3.16	2.11	0.0974113	0.632672	GGA1;GGA3;EPS15;SNX4;WDR91
GO:0030175_filopodium	72	4.17	2.8	0.0993371	0.638596	VCAM1;ACTA2;ACTG2
GO:0005667_transcription_regulator_complex	209	2.87	1.91	0.104533	0.644769	NFATC2;NR4A3;RFX5;SSBP3;RELA;CDK4
GO:0005929_cilium	209	2.87	1.91	0.104533	0.644769	DYNLL2;DYNLL1;GAS8;ANKS6;ADCY3;IFT57
GO:0030870_Mre11_complex	7	14.29	10.69	0.102796	0.644769	MRNIP
GO:0043197_dendritic_spine	162	3.09	2.05	0.105415	0.644769	ARHGAP44;DNAJB1;HIP1R;FXR1;AKAP5
GO:0072562_blood_microparticle	115	3.48	2.32	0.101711	0.644769	HSPA1A;HSPA8;GRIPAP1;ACTG2
GO:0030424_axon	311	2.57	1.7	0.108702	0.658484	CA2;HSPA8;IGSF9;FXR1;GRIPAP1;STX1A;SYT4;BIN1
GO:0005741_mitochondrial_outer_membrane	166	3.01	2	0.113731	0.667766	ACACB;AKAP1;PDE2A;MIGA2;RAF1
GO:0005769_early_endosome	264	2.65	1.76	0.114253	0.667766	VCAM1;F2RL1;ARRDC3;KIFC1;GGA1;ARRDC4;HSPD1
GO:0044297_cell_body	76	3.95	2.64	0.11212	0.667766	TUBB;ACTA2;ACTG2
GO:0070652_HAUS_complex	8	12.5	9.16	0.116594	0.667766	HAUS5
GO:0070776_MOZ/MORF_histone_acetyltransferase_complex	8	12.5	9.16	0.116594	0.667766	ING5
GO:0099078_BORC_complex	8	12.5	9.16	0.116594	0.667766	KXD1
GO:0005923_bicellular_tight_junction	122	3.28	2.18	0.119263	0.670856	TJAP1;CLDN15;CDK4;CYTH2
GO:0036464_cytoplasmic_ribonucleoprotein_granule	78	3.85	2.57	0.118735	0.670856	DDX6;TUBB;FXR1
GO:0048786_presynaptic_active_zone	39	5.13	3.47	0.12064	0.672596	ARHGAP44;PPFIA4
GO:0005802_trans-Golgi_network	172	2.91	1.93	0.126774	0.684713	TJAP1;GGA3;PCSK7;SMPD4;ATG9A
GO:0005844_polysome	40	5	3.38	0.125757	0.684713	FUS;FXR1
GO:0012505_endomembrane_system	125	3.2	2.13	0.127161	0.684713	CDAN1;STX1A;VMP1;CYB5D2
GO:0031305_integral_component_of_mitochondrial_inner_membrane	40	5	3.38	0.125757	0.684713	PISD;SFXN5
GO:0005664_nuclear_origin_of_replication_recognition_complex	9	11.11	8.02	0.13018	0.68919	MCM2
GO:0008385_IkappaB_kinase_complex	9	11.11	8.02	0.13018	0.68919	IFIT5
GO:0001650_fibrillar_center	129	3.1	2.06	0.138021	0.706576	DDX11;APEX2;TAF1C;PRMT7
GO:0005694_chromosome	130	3.08	2.04	0.140793	0.706576	ZNF276;SIRT2;ING5;TOP3A
GO:0005797_Golgi_medial_cisterna	10	10	7.13	0.143558	0.706576	HID1
GO:0005832_chaperonin-containing_T-complex	10	10	7.13	0.143558	0.706576	CCT6B
GO:0042582_azurophil_granule	10	10	7.13	0.143558	0.706576	AZU1
GO:0042645_mitochondrial_nucleoid	43	4.65	3.13	0.141401	0.706576	POLG;ACADVL
GO:0044224_juxtaparanode_region_of_axon	10	10	7.13	0.143558	0.706576	SIRT2
GO:0072687_meiotic_spindle	10	10	7.13	0.143558	0.706576	SIRT2
GO:1990907_beta-catenin-TCF_complex	10	10	7.13	0.143558	0.706576	PYGO2
GO:0016529_sarcoplasmic_reticulum	44	4.55	3.06	0.146705	0.716465	POMT1;ATP2A1
GO:0000139_Golgi_membrane	617	2.11	1.39	0.158281	0.723005	PKMYT1;MAN2A2;SCARA3;SCARB2;SMPD4;B3GALT2;DSEL;PJA2;XYLT2;QSOX1;HYAL2;CYTH2;SEC24D
GO:0001741_XY_body	13	7.69	5.35	0.182473	0.723005	BIRC2
GO:0005635_nuclear_envelope	183	2.73	1.81	0.152353	0.723005	SMPD4;AAAS;NUP210;LEMD2;BIN1
GO:0005675_transcription_factor_TFIIH_holo_complex	13	7.69	5.35	0.182473	0.723005	MMS19
GO:0005681_spliceosomal_complex	91	3.3	2.19	0.164898	0.723005	HSPA8;SF3B4;U2AF2
GO:0005856_cytoskeleton	406	2.22	1.46	0.175716	0.723005	TUBB;TRIM46;SLC7A11;HIP1R;FCHO1;TUBB4B;FGD3;BIN1;DIXDC1
GO:0005876_spindle_microtubule	45	4.44	2.99	0.152049	0.723005	PLK1;AURKB
GO:0010369_chromocenter	13	7.69	5.35	0.182473	0.723005	AURKB
GO:0030017_sarcomere	46	4.35	2.92	0.15743	0.723005	ARHGEF25;ILK
GO:0030027_lamellipodium	185	2.7	1.79	0.157221	0.723005	PXN;ACTA2;ILK;FGD3;ACTG2
GO:0030054_cell_junction	192	2.6	1.72	0.174747	0.723005	NAMPT;NCAPH2;PLEKHA7;ILK;C4orf19
GO:0030122_AP-2_adaptor_complex	11	9.09	6.42	0.156731	0.723005	EPS15
GO:0030688_preribosome,_small_subunit_precursor	13	7.69	5.35	0.182473	0.723005	RIOK2
GO:0031201_SNARE_complex	50	4	2.68	0.179286	0.723005	SNX4;STX1A
GO:0031410_cytoplasmic_vesicle	289	2.42	1.6	0.159161	0.723005	HAS2;ACSBG1;UBQLN4;DENND4B;UBQLN1;DVL2;HYAL2
GO:0031461_cullin-RING_ubiquitin_ligase_complex	13	7.69	5.35	0.182473	0.723005	CUL9
GO:0033270_paranode_region_of_axon	12	8.33	5.83	0.169701	0.723005	SIRT2
GO:0033391_chromatoid_body	13	7.69	5.35	0.182473	0.723005	DDX6
GO:0035631_CD40_receptor_complex	11	9.09	6.42	0.156731	0.723005	BIRC2
GO:0042641_actomyosin	13	7.69	5.35	0.182473	0.723005	STX1A
GO:0043202_lysosomal_lumen	94	3.19	2.12	0.176221	0.723005	HSP90AA1;HSPA8;SCARB2
GO:0043220_Schmidt-Lanterman_incisure	11	9.09	6.42	0.156731	0.723005	SIRT2
GO:0043596_nuclear_replication_fork	12	8.33	5.83	0.169701	0.723005	TONSL
GO:0044327_dendritic_spine_head	12	8.33	5.83	0.169701	0.723005	FUS
GO:0046930_pore_complex	13	7.69	5.35	0.182473	0.723005	PLEKHA7
GO:0048188_Set1C/COMPASS_complex	12	8.33	5.83	0.169701	0.723005	CXXC1
GO:0048787_presynaptic_active_zone_membrane	12	8.33	5.83	0.169701	0.723005	STX1A
GO:0097386_glial_cell_projection	13	7.69	5.35	0.182473	0.723005	SIRT2
GO:1902494_catalytic_complex	12	8.33	5.83	0.169701	0.723005	P3H3
GO:1990454_L-type_voltage-gated_calcium_channel_complex	12	8.33	5.83	0.169701	0.723005	CACNB3
GO:0000800_lateral_element	14	7.14	4.94	0.195048	0.726007	REC8
GO:0001673_male_germ_cell_nucleus	14	7.14	4.94	0.195048	0.726007	REC8
GO:0005639_integral_component_of_nuclear_inner_membrane	15	6.67	4.58	0.207431	0.726007	LEMD2
GO:0005662_DNA_replication_factor_A_complex	15	6.67	4.58	0.207431	0.726007	TONSL
GO:0005746_mitochondrial_respirasome	15	6.67	4.58	0.207431	0.726007	RAB5IF
GO:0005773_vacuole	15	6.67	4.58	0.207431	0.726007	GLB1L2
GO:0005791_rough_endoplasmic_reticulum	55	3.64	2.42	0.207182	0.726007	SLC7A11;HSPD1
GO:0005940_septin_ring	14	7.14	4.94	0.195048	0.726007	SEPT5
GO:0009898_cytoplasmic_side_of_plasma_membrane	52	3.85	2.57	0.19038	0.726007	BIRC2;AKAP5
GO:0030127_COPII_vesicle_coat	15	6.67	4.58	0.207431	0.726007	SEC24D
GO:0030673_axolemma	15	6.67	4.58	0.207431	0.726007	THY1
GO:0031083_BLOC-1_complex	15	6.67	4.58	0.207431	0.726007	KXD1
GO:0031105_septin_complex	14	7.14	4.94	0.195048	0.726007	SEPT5
GO:0031616_spindle_pole_centrosome	15	6.67	4.58	0.207431	0.726007	AURKB
GO:0032153_cell_division_site	14	7.14	4.94	0.195048	0.726007	SEPT5
GO:0033268_node_of_Ranvier	15	6.67	4.58	0.207431	0.726007	BIN1
GO:0035102_PRC1_complex	15	6.67	4.58	0.207431	0.726007	CBX2
GO:0042470_melanosome	99	3.03	2.01	0.195545	0.726007	HSP90AA1;HSPA8;SGSM2
GO:0043657_host_cell	51	3.92	2.62	0.184821	0.726007	AAAS;NUP210
GO:0060077_inhibitory_synapse	14	7.14	4.94	0.195048	0.726007	IGSF9
GO:0099523_presynaptic_cytosol	14	7.14	4.94	0.195048	0.726007	HSPA8
GO:0005764_lysosome	261	2.3	1.51	0.214897	0.728224	TNFAIP3;KLHL22;ARRDC3;HSPA8;TMEM25;HYAL2
GO:0005778_peroxisomal_membrane	57	3.51	2.34	0.218469	0.728224	ABCD4;PEX6
GO:0016442_RISC_complex	16	6.25	4.28	0.219623	0.728224	DDX6
GO:0030665_clathrin-coated_vesicle_membrane	56	3.57	2.38	0.212818	0.728224	SCARB2;HIP1R
GO:0032982_myosin_filament	16	6.25	4.28	0.219623	0.728224	ACTG2
GO:0034045_phagophore_assembly_site_membrane	16	6.25	4.28	0.219623	0.728224	WDR45
GO:0035098_ESC/E(Z)_complex	16	6.25	4.28	0.219623	0.728224	PHF19
GO:0043204_perikaryon	156	2.56	1.69	0.219597	0.728224	FUS;SEMA4F;PPP5C;SIRT2
GO:0071004_U2-type_prespliceosome	16	6.25	4.28	0.219623	0.728224	U2AF2
GO:1904115_axon_cytoplasm	57	3.51	2.34	0.218469	0.728224	TRIM46;SPG7
GO:0031526_brush_border_membrane	58	3.45	2.29	0.224132	0.739283	SLC26A6;SLC7A11
GO:0016363_nuclear_matrix	109	2.75	1.82	0.235566	0.772951	UHRF1;MBD1;CXXC1
GO:0005847_mRNA_cleavage_and_polyadenylation_specificity_factor_complex	18	5.56	3.77	0.24345	0.790584	CPSF4
GO:0099524_postsynaptic_cytosol	18	5.56	3.77	0.24345	0.790584	HSPA8
GO:0030992_intraciliary_transport_particle_B	19	5.26	3.56	0.255089	0.824135	IFT57
GO:0005643_nuclear_pore	65	3.08	2.04	0.263991	0.835456	AAAS;NUP210
GO:0016234_inclusion_body	20	5	3.38	0.26655	0.835456	HSPA1A
GO:0016328_lateral_plasma_membrane	65	3.08	2.04	0.263991	0.835456	CLDN15;DVL2
GO:0030863_cortical_cytoskeleton	20	5	3.38	0.26655	0.835456	SELE
GO:0031674_I_band	20	5	3.38	0.26655	0.835456	BIN1
GO:0044306_neuron_projection_terminus	20	5	3.38	0.26655	0.835456	SYT4
GO:0030666_endocytic_vesicle_membrane	66	3.03	2.01	0.269698	0.841138	MDM2;SCARB2
GO:1903561_extracellular_vesicle	172	2.33	1.53	0.272832	0.84672	ARRDC4;MAN1B1;TUBB4B;DNAJC3
GO:0001725_stress_fiber	68	2.94	1.95	0.281107	0.863891	PXN;ILK
GO:0031902_late_endosome_membrane	120	2.5	1.65	0.281018	0.863891	SCARB2;ATG9A;WDR91
GO:0005576_extracellular_region	1802	1.72	1.13	0.283279	0.866338	HSPH1;CXCL10;CCL2;CXCL3;HSPA1A;ILF3;HSP90AA1;TUBB;FSTL5;HSPA8;CXCL8;THY1;IL6ST;EPHB3;BMP7;GAS8;COL11A1;CCDC134;AZU1;C6orf120;AQP4;RSPO3;STK36;STX1A;TUBB4B;GLB1L2;TMEM25;DNAJC3;VWCE;CYB5D2;QSOX1
GO:0005622_intracellular	122	2.46	1.62	0.289379	0.868138	ARHGAP44;NCOA7;SMG9
GO:0030687_preribosome,_large_subunit_precursor	22	4.55	3.05	0.288947	0.868138	MAK16
GO:0042629_mast_cell_granule	22	4.55	3.05	0.288947	0.868138	NR4A3
GO:0097731_9+0_non-motile_cilium	22	4.55	3.05	0.288947	0.868138	DYNLL2
GO:0005768_endosome	294	2.04	1.34	0.299409	0.882792	ARRDC3;TJAP1;ARRDC4;ATG9A;EHBP1L1;BIN1
GO:0016324_apical_plasma_membrane	353	1.98	1.3	0.30127	0.882792	CACNB3;SLC26A6;THY1;DDR2;EPS15;HIP1R;HYAL2
GO:0035371_microtubule_plus-end	23	4.35	2.92	0.299889	0.882792	KIF18B
GO:0044322_endoplasmic_reticulum_quality_control_compartment	23	4.35	2.92	0.299889	0.882792	MAN1B1
GO:1904813_ficolin-1-rich_granule_lumen	124	2.42	1.59	0.297759	0.882792	HSPA1A;HSP90AA1;HSPA8
GO:0070821_tertiary_granule_membrane	72	2.78	1.83	0.303872	0.886294	DYNLL1;NBEAL2
GO:0000123_histone_acetyltransferase_complex	24	4.17	2.79	0.310662	0.889623	ING5
GO:0034704_calcium_channel_complex	24	4.17	2.79	0.310662	0.889623	ATP2A1
GO:0044305_calyx_of_Held	24	4.17	2.79	0.310662	0.889623	TSPOAP1
GO:0090734_site_of_DNA_damage	24	4.17	2.79	0.310662	0.889623	UBQLN4
GO:0005901_caveola	75	2.67	1.76	0.320862	0.907624	SELE;BMPR1A
GO:0008305_integrin_complex	25	4	2.67	0.32127	0.907624	ITGA7
GO:0097228_sperm_principal_piece	25	4	2.67	0.32127	0.907624	ENKUR
GO:0008021_synaptic_vesicle	131	2.29	1.5	0.327165	0.92015	SEPT5;STX1A;BIN1
GO:0000793_condensed_chromosome	26	3.85	2.57	0.331715	0.920619	NCAPH2
GO:0045334_clathrin-coated_endocytic_vesicle	26	3.85	2.57	0.331715	0.920619	DVL2
GO:0070382_exocytic_vesicle	26	3.85	2.57	0.331715	0.920619	SYT4
GO:0005640_nuclear_outer_membrane	27	3.7	2.47	0.342	0.936782	SMPD4
GO:0005891_voltage-gated_calcium_channel_complex	27	3.7	2.47	0.342	0.936782	CACNB3
GO:0031519_PcG_protein_complex	27	3.7	2.47	0.342	0.936782	CBX2
GO:0002102_podosome	28	3.57	2.38	0.352127	0.948033	VCAM1
GO:0005689_U12-type_spliceosomal_complex	28	3.57	2.38	0.352127	0.948033	SF3B4
GO:0005763_mitochondrial_small_ribosomal_subunit	28	3.57	2.38	0.352127	0.948033	MRPS2
GO:0032809_neuronal_cell_body_membrane	28	3.57	2.38	0.352127	0.948033	THY1
GO:0000137_Golgi_cis_cisterna	29	3.45	2.29	0.362098	0.954484	NECAB3
GO:0005770_late_endosome	138	2.17	1.43	0.356557	0.954484	HSPA8;ATG9A;TMEM25
GO:0030016_myofibril	29	3.45	2.29	0.362098	0.954484	ARHGEF25
GO:0044295_axonal_growth_cone	29	3.45	2.29	0.362098	0.954484	HSP90AA1
GO:0097225_sperm_midpiece	29	3.45	2.29	0.362098	0.954484	SLC26A6
GO:0000307_cyclin-dependent_protein_kinase_holoenzyme_complex	30	3.33	2.21	0.371916	0.964228	CDK4
GO:0012506_vesicle_membrane	30	3.33	2.21	0.371916	0.964228	SLC26A6
GO:0055038_recycling_endosome_membrane	84	2.38	1.56	0.371112	0.964228	GGA3;GRIPAP1
GO:0097431_mitotic_spindle_pole	30	3.33	2.21	0.371916	0.964228	MAPKBP1
GO:0000777_condensed_chromosome_kinetochore	86	2.33	1.53	0.382088	0.974555	ZNF276;CENPM
GO:0046658_anchored_component_of_plasma_membrane	31	3.23	2.14	0.381584	0.974555	HYAL2
GO:0070971_endoplasmic_reticulum_exit_site	31	3.23	2.14	0.381584	0.974555	SEC24D
GO:0090543_Flemming_body	31	3.23	2.14	0.381584	0.974555	EXOC7
GO:0000932_P-body	88	2.27	1.49	0.39298	0.989077	DDX6;BTBD1
GO:0005875_microtubule_associated_complex	32	3.12	2.07	0.391103	0.989077	PXN
GO:0043235_receptor_complex	207	1.93	1.26	0.394061	0.989077	IL6ST;EPHB3;DDR2;BMPR1A
GO:0044853_plasma_membrane_raft	32	3.12	2.07	0.391103	0.989077	HAS2
GO:0000421_autophagosome_membrane	33	3.03	2	0.400476	0.989411	VMP1
GO:0032839_dendrite_cytoplasm	33	3.03	2	0.400476	0.989411	HIP1R
GO:0033017_sarcoplasmic_reticulum_membrane	33	3.03	2	0.400476	0.989411	ATP2A1
GO:0060076_excitatory_synapse	33	3.03	2	0.400476	0.989411	AKAP5
GO:0005719_nuclear_euchromatin	34	2.94	1.94	0.409705	0.992746	ID2
GO:0030141_secretory_granule	91	2.2	1.44	0.409154	0.992746	STX1A;HSPD1
GO:0031941_filamentous_actin	34	2.94	1.94	0.409705	0.992746	EHBP1L1
GO:0035097_histone_methyltransferase_complex	34	2.94	1.94	0.409705	0.992746	CXXC1
GO:0098686_hippocampal_mossy_fiber_to_CA3_synapse	34	2.94	1.94	0.409705	0.992746	RNF19A
GO:0000118_histone_deacetylase_complex	44	2.27	1.49	0.494547	1	HDAC7
GO:0000124_SAGA_complex	12	0	0	1	1
GO:0000127_transcription_factor_TFIIIC_complex	6	0	0	1	1
GO:0000151_ubiquitin_ligase_complex	107	1.87	1.22	0.491507	1	RNF19A;RANBP10
GO:0000159_protein_phosphatase_type_2A_complex	19	0	0	1	1
GO:0000164_protein_phosphatase_type_1_complex	15	0	0	1	1
GO:0000172_ribonuclease_MRP_complex	9	0	0	1	1
GO:0000176_nuclear_exosome_(RNase_complex)	16	0	0	1	1
GO:0000177_cytoplasmic_exosome_(RNase_complex)	12	0	0	1	1
GO:0000178_exosome_(RNase_complex)	18	0	0	1	1
GO:0000228_nuclear_chromosome	52	0	0	1	1
GO:0000242_pericentriolar_material	21	0	0	1	1
GO:0000346_transcription_export_complex	13	0	0	1	1
GO:0000439_transcription_factor_TFIIH_core_complex	12	0	0	1	1
GO:0000445_THO_complex_part_of_transcription_export_complex	6	0	0	1	1
GO:0000502_proteasome_complex	56	1.79	1.16	0.580452	1	UBQLN1
GO:0000506_glycosylphosphatidylinositol-N-acetylglucosaminyltransferase_(GPI-GnT)_complex	8	0	0	1	1
GO:0000775_chromosome,_centromeric_region	52	1.92	1.26	0.553571	1	CENPT
GO:0000781_chromosome,_telomeric_region	56	1.79	1.16	0.580452	1	SIRT2
GO:0000783_nuclear_telomere_cap_complex	9	0	0	1	1
GO:0000786_nucleosome	94	0	0	1	1
GO:0000788_nuclear_nucleosome	39	0	0	1	1
GO:0000794_condensed_nuclear_chromosome	28	0	0	1	1
GO:0000801_central_element	8	0	0	1	1
GO:0000812_Swr1_complex	12	0	0	1	1
GO:0000813_ESCRT_I_complex	10	0	0	1	1
GO:0000815_ESCRT_III_complex	10	0	0	1	1
GO:0000930_gamma-tubulin_complex	15	0	0	1	1
GO:0000940_condensed_chromosome_outer_kinetochore	10	0	0	1	1
GO:0001401_SAM_complex	13	0	0	1	1
GO:0001518_voltage-gated_sodium_channel_complex	17	0	0	1	1
GO:0001527_microfibril	10	0	0	1	1
GO:0001533_cornified_envelope	45	0	0	1	1
GO:0001669_acrosomal_vesicle	94	2.13	1.39	0.425115	1	POMT1;ENKUR
GO:0001726_ruffle	98	1.02	0.66	0.781554	1	FGD3
GO:0001750_photoreceptor_outer_segment	64	1.56	1.02	0.629466	1	PEX6
GO:0001772_immunological_synapse	39	2.56	1.69	0.453767	1	ICAM1
GO:0001891_phagocytic_cup	27	0	0	1	1
GO:0001917_photoreceptor_inner_segment	59	0	0	1	1
GO:0001931_uropod	12	0	0	1	1
GO:0002080_acrosomal_membrane	22	0	0	1	1
GO:0002116_semaphorin_receptor_complex	11	0	0	1	1
GO:0002177_manchette	11	0	0	1	1
GO:0005575_cellular_component	434	1.38	0.9	0.659264	1	CHORDC1;SMYD5;HES5;TMEM120B;ARHGAP42;JRK
GO:0005581_collagen_trimer	60	1.67	1.09	0.605718	1	SCARA3
GO:0005604_basement_membrane	93	0	0	1	1
GO:0005614_interstitial_matrix	13	0	0	1	1
GO:0005615_extracellular_space	1724	1.39	0.9	0.722447	1	VCAM1;CXCL10;CCL2;ICAM1;CXCL3;SELE;QSOX2;HSPA8;CXCL8;SEMA4F;SCARA3;ACTA2;BMP7;LRRN3;COL11A1;PMPCA;PLA2G6;AZU1;SEMA7A;XYLT2;SEMA4A;ACTG2;QSOX1;HSPD1
GO:0005665_RNA_polymerase_II,_core_complex	15	0	0	1	1
GO:0005666_RNA_polymerase_III_complex	18	0	0	1	1
GO:0005669_transcription_factor_TFIID_complex	33	0	0	1	1
GO:0005671_Ada2/Gcn5/Ada3_transcription_activator_complex	15	0	0	1	1
GO:0005680_anaphase-promoting_complex	22	0	0	1	1
GO:0005682_U5_snRNP	21	0	0	1	1
GO:0005684_U2-type_spliceosomal_complex	12	0	0	1	1
GO:0005685_U1_snRNP	33	0	0	1	1
GO:0005686_U2_snRNP	21	0	0	1	1
GO:0005687_U4_snRNP	12	0	0	1	1
GO:0005688_U6_snRNP	13	0	0	1	1
GO:0005697_telomerase_holoenzyme_complex	21	0	0	1	1
GO:0005721_pericentric_heterochromatin	14	0	0	1	1
GO:0005736_RNA_polymerase_I_complex	13	0	0	1	1
GO:0005742_mitochondrial_outer_membrane_translocase_complex	9	0	0	1	1
GO:0005744_TIM23_mitochondrial_import_inner_membrane_translocase_complex	10	0	0	1	1
GO:0005747_mitochondrial_respiratory_chain_complex_I	50	0	0	1	1
GO:0005750_mitochondrial_respiratory_chain_complex_III	13	0	0	1	1
GO:0005751_mitochondrial_respiratory_chain_complex_IV	12	0	0	1	1
GO:0005753_mitochondrial_proton-transporting_ATP_synthase_complex	18	0	0	1	1
GO:0005758_mitochondrial_intermembrane_space	78	1.28	0.83	0.701894	1	TXNIP
GO:0005759_mitochondrial_matrix	371	1.62	1.05	0.507424	1	OGDHL;PDE2A;IDH3G;ACADVL;TOP3A;HSPD1
GO:0005761_mitochondrial_ribosome	24	0	0	1	1
GO:0005762_mitochondrial_large_ribosomal_subunit	57	1.75	1.14	0.586916	1	MRPL50
GO:0005765_lysosomal_membrane	315	1.59	1.03	0.533627	1	HSPA8;SCARB2;ABCD4;KXD1;ABCC10
GO:0005771_multivesicular_body	42	0	0	1	1
GO:0005774_vacuolar_membrane	21	0	0	1	1
GO:0005777_peroxisome	106	1.89	1.23	0.486571	1	ABCD4;PEX6
GO:0005779_integral_component_of_peroxisomal_membrane	15	0	0	1	1
GO:0005782_peroxisomal_matrix	52	1.92	1.26	0.553571	1	HSPD1
GO:0005786_signal_recognition_particle,_endoplasmic_reticulum_targeting	14	0	0	1	1
GO:0005788_endoplasmic_reticulum_lumen	299	1.34	0.87	0.677295	1	P4HA1;COL11A1;DNAJC3;QSOX1
GO:0005793_endoplasmic_reticulum-Golgi_intermediate_compartment	77	0	0	1	1
GO:0005795_Golgi_stack	37	0	0	1	1
GO:0005796_Golgi_lumen	102	0.98	0.63	0.794729	1	PPIL2
GO:0005798_Golgi-associated_vesicle	17	0	0	1	1
GO:0005801_cis-Golgi_network	65	1.54	1	0.635177	1	RETREG1
GO:0005811_lipid_droplet	93	1.08	0.7	0.763892	1	LSS
GO:0005833_hemoglobin_complex	12	0	0	1	1
GO:0005834_heterotrimeric_G-protein_complex	34	0	0	1	1
GO:0005839_proteasome_core_complex	20	0	0	1	1
GO:0005840_ribosome	67	0	0	1	1
GO:0005845_mRNA_cap_binding_complex	11	0	0	1	1
GO:0005851_eukaryotic_translation_initiation_factor_2B_complex	6	0	0	1	1
GO:0005852_eukaryotic_translation_initiation_factor_3_complex	17	0	0	1	1
GO:0005858_axonemal_dynein_complex	11	0	0	1	1
GO:0005859_muscle_myosin_complex	15	0	0	1	1
GO:0005861_troponin_complex	9	0	0	1	1
GO:0005865_striated_muscle_thin_filament	10	0	0	1	1
GO:0005882_intermediate_filament	107	1.87	1.22	0.491507	1	MICAL1;NCKIPSD
GO:0005884_actin_filament	86	1.16	0.75	0.736748	1	AIF1L
GO:0005885_Arp2/3_protein_complex	11	0	0	1	1
GO:0005887_integral_component_of_plasma_membrane	1389	1.51	0.98	0.563546	1	VCAM1;ICAM1;HAS2;SELE;F2RL1;IGDCC3;SEMA4F;SLC26A6;THY1;LMBR1L;EPHB3;DDR2;EDNRA;MIGA2;ADCY3;AQP4;SEMA7A;SLC16A6;SLC29A2;SEMA4A;EDNRB
GO:0005890_sodium:potassium-exchanging_ATPase_complex	12	0	0	1	1
GO:0005892_acetylcholine-gated_channel_complex	16	0	0	1	1
GO:0005903_brush_border	55	0	0	1	1
GO:0005911_cell-cell_junction	187	1.07	0.69	0.784813	1	PXN;ILK
GO:0005912_adherens_junction	157	1.27	0.83	0.697819	1	CDCA3;CYTH2
GO:0005921_gap_junction	19	0	0	1	1
GO:0005922_connexin_complex	21	0	0	1	1
GO:0005930_axoneme	104	1.92	1.26	0.47661	1	GAS8;IFT57
GO:0005938_cell_cortex	142	1.41	0.91	0.644346	1	PXN;HIP1R
GO:0005952_cAMP-dependent_protein_kinase_complex	10	0	0	1	1
GO:0008023_transcription_elongation_factor_complex	22	0	0	1	1
GO:0008076_voltage-gated_potassium_channel_complex	85	1.18	0.76	0.732624	1	STX1A
GO:0008250_oligosaccharyltransferase_complex	12	0	0	1	1
GO:0008274_gamma-tubulin_ring_complex	8	0	0	1	1
GO:0008278_cohesin_complex	10	0	0	1	1
GO:0008328_ionotropic_glutamate_receptor_complex	12	0	0	1	1
GO:0008540_proteasome_regulatory_particle,_base_subcomplex	12	0	0	1	1
GO:0009925_basal_plasma_membrane	51	1.96	1.28	0.546587	1	EPS15
GO:0009986_cell_surface	595	1.68	1.1	0.432431	1	VCAM1;ICAM1;ITGA7;HSP90AA1;SLC7A11;THY1;PPFIA4;DIP2A;HYAL2;HSPD1
GO:0010008_endosome_membrane	222	1.8	1.18	0.445592	1	GGA1;GGA3;SCARB2;AQP4
GO:0010494_cytoplasmic_stress_granule	74	1.35	0.88	0.682778	1	DDX6
GO:0012507_ER_to_Golgi_transport_vesicle_membrane	52	1.92	1.26	0.553571	1	SEC24D
GO:0014701_junctional_sarcoplasmic_reticulum_membrane	9	0	0	1	1
GO:0014704_intercalated_disc	46	0	0	1	1
GO:0015030_Cajal_body	71	0	0	1	1
GO:0015935_small_ribosomal_subunit	20	0	0	1	1
GO:0016010_dystrophin-associated_glycoprotein_complex	17	0	0	1	1
GO:0016021_integral_component_of_membrane	3570	1.57	1.02	0.457571	1	RNF19A;CDAN1;CNNM3;AKAP1;GDPD5;ADAM11;MAN2A2;SLC26A6;SLC7A11;SCARA3;SLC25A39;CYP39A1;GGT7;CD276;SCARB2;POMT1;LRRN3;GPR162;ABCD4;SMPD4;GBA2;SLC41A3;ATG9A;B3GALT2;IGSF9;CLDN15;DSEL;PLA2G6;ADCY3;TMEM120B;TMEM44;AQP4;NUP210;TMEM145;LEMD2;MAN1B1;ATP2A1;SLC16A6;XYLT2;STX1A;RAB5IF;PSD2;VMP1;SLC29A2;BMPR1A;SMCO3;TMEM25;PLP1;CYP46A1;SPACA6;ABCC10;GPR173;ZDHHC22;UBE2J1;LEMD1;CA14
GO:0016281_eukaryotic_translation_initiation_factor_4F_complex	13	0	0	1	1
GO:0016282_eukaryotic_43S_preinitiation_complex	17	0	0	1	1
GO:0016323_basolateral_plasma_membrane	215	1.86	1.22	0.421678	1	CA2;SLC26A6;AQP4;SLC29A2
GO:0016327_apicolateral_plasma_membrane	19	0	0	1	1
GO:0016342_catenin_complex	31	0	0	1	1
GO:0016459_myosin_complex	32	0	0	1	1
GO:0016471_vacuolar_proton-transporting_V-type_ATPase_complex	14	0	0	1	1
GO:0016514_SWI/SNF_complex	19	0	0	1	1
GO:0016580_Sin3_complex	13	0	0	1	1
GO:0016581_NuRD_complex	15	0	0	1	1
GO:0016591_RNA_polymerase_II,_holoenzyme	7	0	0	1	1
GO:0016592_mediator_complex	41	2.44	1.6	0.470458	1	CDK4
GO:0016593_Cdc73/Paf1_complex	8	0	0	1	1
GO:0016600_flotillin_complex	8	0	0	1	1
GO:0016605_PML_body	101	0.99	0.64	0.791512	1	TOP3A
GO:0017053_transcription_repressor_complex	54	1.85	1.21	0.56722	1	RELB
GO:0017101_aminoacyl-tRNA_synthetase_multienzyme_complex	11	0	0	1	1
GO:0017119_Golgi_transport_complex	13	0	0	1	1
GO:0017146_NMDA_selective_glutamate_receptor_complex	11	0	0	1	1
GO:0019005_SCF_ubiquitin_ligase_complex	63	0	0	1	1
GO:0019773_proteasome_core_complex,_alpha-subunit_complex	8	0	0	1	1
GO:0019774_proteasome_core_complex,_beta-subunit_complex	11	0	0	1	1
GO:0019814_immunoglobulin_complex	0	NA	0	1	1
GO:0019897_extrinsic_component_of_plasma_membrane	23	0	0	1	1
GO:0022624_proteasome_accessory_complex	17	0	0	1	1
GO:0022625_cytosolic_large_ribosomal_subunit	56	0	0	1	1
GO:0022627_cytosolic_small_ribosomal_subunit	46	0	0	1	1
GO:0030008_TRAPP_complex	15	0	0	1	1
GO:0030014_CCR4-NOT_complex	16	0	0	1	1
GO:0030018_Z_disc	128	0.78	0.5	0.863033	1	BIN1
GO:0030057_desmosome	25	0	0	1	1
GO:0030126_COPI_vesicle_coat	13	0	0	1	1
GO:0030133_transport_vesicle	92	0	0	1	1
GO:0030134_COPII-coated_ER_to_Golgi_transport_vesicle	41	0	0	1	1
GO:0030136_clathrin-coated_vesicle	59	1.69	1.1	0.599548	1	HIP1R
GO:0030137_COPI-coated_vesicle	11	0	0	1	1
[truncated: 205 more rows]

## Sheet: MF_24hrs - ORA_T4Mt24_vs_NIt24-
ORA_T4Mt24_vs_NIt24-MF_all
[truncated: 889 more rows]

## Sheet: BP_40hrs - ORA_T4Mt40_vs_NIt40-
ORA_T4Mt40_vs_NIt40-BP_all
[truncated: 2,906 more rows]

[truncated: 5 more sheets: CC_40hrs - ORA_T4Mt40_vs_NIt40-, MF_40hrs - ORA_T4Mt40_vs_NIt40-, KEGG_8hrs - ORA_T4Mt8_vs_NIt8-k, KEGG_24hrs - ORA_T4Mt24_vs_NIt2, KEGG_40hrs - ORA_T4Mt40_vs_NIt4]
