# Supplementary material for: Early Transcriptional Changes in Rabies Virus-Infected Neurons and Their Impact on Neuronal Functions
Source: Front Microbiol. 2021 Dec 13;12:730892. doi: 10.3389/fmicb.2021.730892 (PMC8713068; doi:10.3389/fmicb.2021.730892)
Supplement: Supplementary file 7 [file Table_6.XLSX]

## Sheet: Common between Tha and Th4M - O
ORA_Tha-T4M_common-go_all
geneset	NGenes	pctDE	OR	pvalue	FDR	external_gene_name.DE
GO:0000083_regulation_of_transcription_involved_in_G1/S_transition_of_mitotic_cell_cycle	23	47.83	66.14	4.17251e-15	3.15442e-12	PCNA;TFDP1;TYMS;E2F1;POLA1;CDC6;FBXO5;CDT1;CDC45;ORC1;CCNE1
GO:0006977_DNA_damage_response,_signal_transduction_by_p53_class_mediator_resulting_in_cell_cycle_arrest	56	25	24.29	3.06787e-14	1.15965e-11	CDKN1A;MDM2;PCNA;TFDP1;PLK2;CCNB1;CDK1;E2F1;PLK3;CDK2;GTSE1;GADD45A;CHEK2;E2F8
GO:0000281_mitotic_cytokinesis	52	25	24.22	2.57563e-13	6.49059e-11	CKAP2;RACGAP1;PLK1;KIF4A;ANLN;KIF23;KIF20A;ESPL1;CEP55;CDT1;BRCA2;CENPA;NUSAP1
GO:1901796_regulation_of_signal_transduction_by_p53_class_mediator	131	12.98	10.92	4.83451e-12	9.13722e-10	MDM2;RPA1;TPX2;RPA2;RFC2;PLK3;RFC4;CDK2;RFC5;CHEK1;BRCA1;BLM;AURKB;EXO1;BRIP1;CHEK2;RMI2
GO:0007018_microtubule-based_movement	79	16.46	14.3	7.60919e-11	1.15051e-08	KIF22;RACGAP1;KIFC1;KIF11;KIF4A;KIF2C;KIF15;KIF23;CENPE;KIF20A;KIF18B;KIF24;DNAH12
GO:0006978_DNA_damage_response,_signal_transduction_by_p53_class_mediator_resulting_in_transcription_of_p21_class_mediator	14	35.71	39.52	9.55492e-07	0.000120392	CDKN1A;FOXM1;BRCA1;BRCA2;CHEK2
GO:0045893_positive_regulation_of_transcription,_DNA-templated	565	4.07	3.11	5.98151e-06	0.000646003	ACTA2;SPP1;JMJD6;PAX6;MYBL2;ATAD2;FOXM1;FOS;E2F1;CCNA2;CDK2;BRCA1;NFKB1;PHF19;EGF;DDIT3;BLM;BRCA2;CHEK2;CCNE1;NFATC2;NFATC1;WNT3A
GO:0097711_ciliary_basal_body-plasma_membrane_docking	95	9.47	7.51	7.7844e-06	0.000735626	TUBB;HSP90AA1;DYNLL1;PLK1;CDK1;HAUS1;PLK4;NEK2;KIF24
GO:0072425_signal_transduction_involved_in_G2_DNA_damage_checkpoint	11	36.36	40.54	1.16454e-05	0.000978215	PLK1;CHEK1;BRCA1;DTL
GO:0032465_regulation_of_cytokinesis	41	14.63	12.22	2.17765e-05	0.00164631	PLK2;PLK1;PLK3;KIF20A;AURKB;BRCA2
GO:0019221_cytokine-mediated_signaling_pathway	279	5.02	3.82	4.50303e-05	0.00309481	HSPA8;HSP90AA1;CDKN1A;BIRC5;CCL2;VCAM1;FOS;STX3;ICAM1;JAK3;IL32;CXCL10;CXCL2;CXCL8
GO:0045944_positive_regulation_of_transcription_by_RNA_polymerase_II	1133	2.91	2.21	6.77971e-05	0.00427121	SQSTM1;TOP2A;TFDP1;NAMPT;JMJD6;CKAP2;PAX6;MYBL2;RFX5;UHRF1;ATAD2;FOXM1;FOS;E2F1;ATF3;BRCA1;NFKB1;NFKBIA;ETV4;DDIT3;NFKB2;CSRNP1;F2RL1;MAFF;E2F2;RELB;GRHL3;NFATC2;NFATC1;FOSB;E2F8;CXCL10;WNT3A
GO:0000122_negative_regulation_of_transcription_by_RNA_polymerase_II	811	3.21	2.43	9.07321e-05	0.00527642	SQSTM1;MDM2;DNAJB1;PCNA;TIMELESS;PAX6;RFX5;UHRF1;FOXM1;PLK1;E2F1;PLK3;CDK2;ATF3;NFKB1;FST;DDIT3;SUV39H1;AURKB;E2F2;RELB;CCNE1;ZFP36;NFATC2;FOSB;E2F8
GO:0035556_intracellular_signal_transduction	374	4.01	3.02	0.000291602	0.0157465	SQSTM1;HSPB1;RACGAP1;STK32A;CHEK1;MELK;MASTL;PLA2G4C;PKN3;PLCD4;HASPIN;NFATC1;TGFA;JAK3;CXCL8
GO:0072332_intrinsic_apoptotic_signaling_pathway_by_p53_class_mediator	24	16.67	14.19	0.000324576	0.0163586	EDA2R;E2F1;E2F2;PMAIP1
GO:0061844_antimicrobial_humoral_immune_response_mediated_by_antimicrobial_peptide	67	8.96	7.01	0.000355845	0.0168137	HMGN2;GALP;CXCL3;CXCL10;CXCL2;CXCL8
GO:0006283_transcription-coupled_nucleotide-excision_repair	73	8.22	6.38	0.00056575	0.0237615	PCNA;RPA1;RPA2;RFC2;RFC4;RFC5
GO:0042770_signal_transduction_in_response_to_DNA_damage	12	25	23.58	0.000548771	0.0237615	CASP9;GADD45A;CHEK2
GO:0042771_intrinsic_apoptotic_signaling_pathway_in_response_to_DNA_damage_by_p53_class_mediator	29	13.79	11.35	0.00068646	0.0273139	CDKN1A;AEN;BRCA2;CHEK2
GO:0016446_somatic_hypermutation_of_immunoglobulin_genes	14	21.43	19.31	0.000889228	0.0336128	UNG;EXO1;POLQ
GO:0007019_microtubule_depolymerization	15	20	17.69	0.00110002	0.0396006	KIF2C;KIF18B;KIF24
GO:0042059_negative_regulation_of_epidermal_growth_factor_receptor_signaling_pathway	35	11.43	9.15	0.00141642	0.0486734	DUSP3;EGF;PTPN3;TGFA
GO:0043122_regulation_of_I-kappaB_kinase/NF-kappaB_signaling	17	17.65	15.17	0.00161012	0.0507188	SQSTM1;HSPB1;F2RL1
GO:1902042_negative_regulation_of_extrinsic_apoptotic_signaling_pathway_via_death_domain_receptors	36	11.11	8.86	0.00157602	0.0507188	TNFRSF10B;BRCA1;TNFAIP3;ICAM1
GO:0032467_positive_regulation_of_cytokinesis	39	10.26	8.1	0.00212922	0.0643875	RACGAP1;KIF23;CDC6;AURKB
GO:0070098_chemokine-mediated_signaling_pathway	70	7.14	5.46	0.00303874	0.0883571	CCL2;CXCL3;CXCL10;CXCL2;CXCL8
GO:0002092_positive_regulation_of_receptor_internalization	22	13.64	11.17	0.00346203	0.0934749	EGF;WNT3A;SELE
GO:0007265_Ras_protein_signal_transduction	72	6.94	5.3	0.00343402	0.0934749	CDKN1A;PLK2;CCNA2;CDK2;IQGAP3
GO:0008630_intrinsic_apoptotic_signaling_pathway_in_response_to_DNA_damage	45	8.89	6.92	0.00361118	0.0941398	E2F1;BRCA1;CASP9;CHEK2
GO:0007129_synapsis	24	12.5	10.11	0.00445685	0.112313	FANCD2;CCNE2;CCNE1
GO:0071347_cellular_response_to_interleukin-1	81	6.17	4.67	0.00567875	0.134161	CCL2;NFKB1;HAS2;ICAM1;CXCL8
GO:1900740_positive_regulation_of_protein_insertion_into_mitochondrial_membrane_involved_in_apoptotic_signaling_pathway	26	11.54	9.23	0.00560803	0.134161	TFDP1;E2F1;PMAIP1
GO:0001816_cytokine_production	27	11.11	8.84	0.00624421	0.134875	S1PR3;NFATC2;NFATC1
GO:0032757_positive_regulation_of_interleukin-8_production	27	11.11	8.84	0.00624421	0.134875	HSPA1A;DDIT3;HSPA1B
GO:0051090_regulation_of_DNA-binding_transcription_factor_activity	27	11.11	8.84	0.00624421	0.134875	FOS;FANCA;FANCD2
GO:0001578_microtubule_bundle_formation	29	10.34	8.16	0.00764117	0.160465	PLK1;KIF20A;TPPP3
GO:1990440_positive_regulation_of_transcription_from_RNA_polymerase_II_promoter_in_response_to_endoplasmic_reticulum_stress	11	18.18	15.69	0.00993239	0.202943	ATF3;DDIT3
GO:0006955_immune_response	306	3.27	2.41	0.0116913	0.207621	ENPP2;C5AR1;GEM;ULBP1;SECTM1;CXCL3;IL32;CXCL10;CXCL2;CXCL8
GO:0032230_positive_regulation_of_synaptic_transmission,_GABAergic	12	16.67	14.12	0.0118091	0.207621	CA2;HAP1
GO:0032688_negative_regulation_of_interferon-beta_production	12	16.67	14.12	0.0118091	0.207621	TRAIP;RELB
GO:0033173_calcineurin-NFAT_signaling_cascade	12	16.67	14.12	0.0118091	0.207621	NFATC2;NFATC1
GO:0043517_positive_regulation_of_DNA_damage_response,_signal_transduction_by_p53_class_mediator	12	16.67	14.12	0.0118091	0.207621	SPRED3;PMAIP1
GO:0046785_microtubule_polymerization	12	16.67	14.12	0.0118091	0.207621	FBXO5;TPPP3
GO:0021675_nerve_development	13	15.38	12.84	0.0138279	0.228347	NRP2;CTSV
GO:0030521_androgen_receptor_signaling_pathway	36	8.33	6.43	0.0138941	0.228347	DNAJA1;BRCA1;CCNE1
GO:0031110_regulation_of_microtubule_polymerization_or_depolymerization	13	15.38	12.84	0.0138279	0.228347	SKA3;SKA1
GO:0043491_protein_kinase_B_signaling	38	7.89	6.06	0.0160831	0.258698	SESN2;CCL2;PLK3
GO:0045892_negative_regulation_of_transcription,_DNA-templated	528	2.65	1.95	0.017875	0.281531	HSPA8;MDM2;CENPF;CRYAB;TIMELESS;BIRC5;PDCD4;FOXM1;E2F1;BRCA1;GMNN;DDIT3;SUV39H1;CALCA
GO:0051092_positive_regulation_of_NF-kappaB_transcription_factor_activity	149	4.03	2.98	0.0188999	0.291598	EDA2R;HSPA1A;NFKB1;NFKB2;HSPA1B;ICAM1
GO:0007165_signal_transduction	970	2.27	1.67	0.0192922	0.291697	HSP90AA1;OPTN;NAMPT;SPP1;CCL2;PDE1C;ARHGAP11A;EGF;NOV;TRAIP;C5AR1;GEM;OSGIN1;PKN3;GDF15;TGFA;TEK;SECTM1;ICOSLG;CXCL10;CXCL8;CD70
GO:0045746_negative_regulation_of_Notch_signaling_pathway	42	7.14	5.44	0.0210094	0.311433	NFKBIA;EGF;TCIM
GO:0001843_neural_tube_closure	77	5.19	3.88	0.0231632	0.323883	MTHFD1;STIL;COBL;GRHL3
GO:0030178_negative_regulation_of_Wnt_signaling_pathway	43	6.98	5.3	0.0223558	0.323883	APCDD1;HMGXB4;NFATC1
GO:0031293_membrane_protein_intracellular_domain_proteolysis	17	11.76	9.41	0.0232378	0.323883	NGFR;NFKB1
GO:0033209_tumor_necrosis_factor-mediated_signaling_pathway	116	4.31	3.19	0.0239913	0.323883	EDA2R;NFKBIA;BIRC3;CD70;TNFRSF9
GO:0051591_response_to_cAMP	44	6.82	5.17	0.0237481	0.323883	FOS;TEK;FOSB
GO:0042462_eye_photoreceptor_cell_development	18	11.11	8.82	0.0259035	0.341639	PAX6;MYO7A
GO:0046330_positive_regulation_of_JNK_cascade	80	5	3.73	0.0262104	0.341639	EDA2R;GADD45A;F2RL1;GADD45B
GO:0007157_heterophilic_cell-cell_adhesion_via_plasma_membrane_cell_adhesion_molecules	46	6.52	4.93	0.0266708	0.341748	VCAM1;ICAM1;SELE
GO:0042789_mRNA_transcription_by_RNA_polymerase_II	19	10.53	8.3	0.0286866	0.355526	DDIT3;C5AR1
GO:0071354_cellular_response_to_interleukin-6	19	10.53	8.3	0.0286866	0.355526	NFKB1;ICAM1
GO:0034097_response_to_cytokine	48	6.25	4.71	0.0297767	0.35732	TYMS;NFKB2;RELB
GO:0071277_cellular_response_to_calcium_ion	83	4.82	3.58	0.029487	0.35732	FUS;LGMN;FOS;FOSB
GO:0048011_neurotrophin_TRK_receptor_signaling_pathway	20	10	7.84	0.0315833	0.373078	NGFR;HAP1
GO:0030509_BMP_signaling_pathway	86	4.65	3.45	0.0329955	0.383763	FSTL1;PDCD4;CHRDL1;GDF15
GO:0050807_regulation_of_synapse_organization	21	9.52	7.43	0.0345898	0.390297	TUBB;WNT3A
GO:1900273_positive_regulation_of_long-term_synaptic_potentiation	21	9.52	7.43	0.0345898	0.390297	SQSTM1;LGMN
GO:0006366_transcription_by_RNA_polymerase_II	267	3	2.2	0.0355594	0.395337	PAX6;FOS;NCAPG2;NFKB1;TRIP13;MAFF;NFATC1;FOSB
GO:1903078_positive_regulation_of_protein_localization_to_plasma_membrane	52	5.77	4.33	0.0365341	0.400286	SQSTM1;STX3;WNT3A
GO:0043525_positive_regulation_of_neuron_apoptotic_process	53	5.66	4.24	0.038336	0.402528	MYBL2;CASP9;DDIT3
GO:0050768_negative_regulation_of_neurogenesis	22	9.09	7.06	0.0377026	0.402528	PAX6;WNT3A
GO:0051897_positive_regulation_of_protein_kinase_B_signaling	176	3.41	2.5	0.0383294	0.402528	HSP90AA1;HSP90AB1;EGF;GDF15;TGFA;TEK
GO:0043123_positive_regulation_of_I-kappaB_kinase/NF-kappaB_signaling	179	3.35	2.46	0.0410604	0.425229	TNFRSF10B;PLK2;EDA2R;F2RL1;SECTM1;BIRC3
GO:0010804_negative_regulation_of_tumor_necrosis_factor-mediated_signaling_pathway	24	8.33	6.42	0.0442327	0.451891	F2RL1;TRAIP
GO:0043524_negative_regulation_of_neuron_apoptotic_process	139	3.6	2.64	0.0465923	0.46965	HSP90AB1;LGMN;CCL2;XRCC2;C5AR1
GO:0071353_cellular_response_to_interleukin-4	25	8	6.14	0.0476432	0.473924	HSP90AB1;MCM2
GO:0048675_axon_extension	26	7.69	5.88	0.0511461	0.495724	HSP90AA1;HSP90AB1
GO:0097193_intrinsic_apoptotic_signaling_pathway	26	7.69	5.88	0.0511461	0.495724	CDKN1A;PMAIP1
GO:0051403_stress-activated_MAPK_cascade	27	7.41	5.65	0.0547383	0.51089	CRYAB;NFKB1
GO:0070371_ERK1_and_ERK2_cascade	27	7.41	5.65	0.0547383	0.51089	IQGAP3;EGF
GO:1905606_regulation_of_presynapse_assembly	27	7.41	5.65	0.0547383	0.51089	GPC4;WNT3A
GO:0001774_microglial_cell_activation	28	7.14	5.43	0.0584165	0.532082	NAMPT;C5AR1
GO:0050769_positive_regulation_of_neurogenesis	28	7.14	5.43	0.0584165	0.532082	HAP1;XRCC2
GO:0007249_I-kappaB_kinase/NF-kappaB_signaling	64	4.69	3.48	0.0610277	0.540302	NFKBIA;RELB;BIRC3
GO:0010803_regulation_of_tumor_necrosis_factor-mediated_signaling_pathway	29	6.9	5.23	0.0621776	0.540302	TNFAIP3;BIRC3
GO:0046329_negative_regulation_of_JNK_cascade	29	6.9	5.23	0.0621776	0.540302	DUSP3;F2RL1
GO:0048678_response_to_axon_injury	29	6.9	5.23	0.0621776	0.540302	CDK1;MATN2
GO:0030041_actin_filament_polymerization	31	6.45	4.87	0.0699366	0.568517	DIAPH3;COBL
GO:0038095_Fc-epsilon_receptor_signaling_pathway	110	3.64	2.67	0.0694708	0.568517	FOS;NFKB1;NFATC2;NFATC1
GO:0038128_ERBB2_signaling_pathway	31	6.45	4.87	0.0699366	0.568517	HSP90AA1;EGF
GO:0051482_positive_regulation_of_cytosolic_calcium_ion_concentration_involved_in_phospholipase_C-activating_G_protein-coupled_signaling_pathway	31	6.45	4.87	0.0699366	0.568517	F2RL1;CALCA
GO:0097192_extrinsic_apoptotic_signaling_pathway_in_absence_of_ligand	31	6.45	4.87	0.0699366	0.568517	BAG3;CASP9
GO:1902895_positive_regulation_of_pri-miRNA_transcription_by_RNA_polymerase_II	31	6.45	4.87	0.0699366	0.568517	NGFR;FOS
GO:0007166_cell_surface_receptor_signaling_pathway	206	2.91	2.13	0.071129	0.572059	TNFRSF10B;JMJD6;CCL2;GEM;CXCL10;BIRC3
GO:0007017_microtubule-based_process	32	6.25	4.7	0.0739286	0.576186	TUBB;GTSE1
GO:0008089_anterograde_axonal_transport	32	6.25	4.7	0.0739286	0.576186	KIF4A;HAP1
GO:1900745_positive_regulation_of_p38MAPK_cascade	32	6.25	4.7	0.0739286	0.576186	GADD45A;GADD45B
GO:0038061_NIK/NF-kappaB_signaling	70	4.29	3.16	0.075508	0.58249	NFKB2;RELB;BIRC3
GO:0003333_amino_acid_transmembrane_transport	33	6.06	4.55	0.0779918	0.58378	PDPN;SLC6A12
GO:0008625_extrinsic_apoptotic_signaling_pathway_via_death_domain_receptors	33	6.06	4.55	0.0779918	0.58378	TNFRSF10B;BAG3
GO:0070059_intrinsic_apoptotic_signaling_pathway_in_response_to_endoplasmic_reticulum_stress	33	6.06	4.55	0.0779918	0.58378	TNFRSF10B;DDIT3
GO:0031663_lipopolysaccharide-mediated_signaling_pathway	34	5.88	4.41	0.0821234	0.608679	CCL2;NFKBIA
GO:2001240_negative_regulation_of_extrinsic_apoptotic_signaling_pathway_in_absence_of_ligand	36	5.56	4.15	0.0905811	0.664847	HSPA1A;HSPA1B
GO:2001244_positive_regulation_of_intrinsic_apoptotic_signaling_pathway	38	5.26	3.92	0.0992808	0.721695	DDIT3;PMAIP1
GO:0035735_intraciliary_transport_involved_in_cilium_assembly	40	5	3.71	0.108202	0.779058	DYNLL2;DYNLL1
GO:0000165_MAPK_cascade	263	2.28	1.65	0.166266	0.811424	CCL2;EGF;ZFP36;TGFA;TEK;JAK3
GO:0000226_microtubule_cytoskeleton_organization	103	2.91	2.12	0.176293	0.811424	TUBB;TACC3;CDK1
GO:0001778_plasma_membrane_repair	11	9.09	7.04	0.143985	0.811424	SYTL4
GO:0002091_negative_regulation_of_receptor_internalization	12	8.33	6.4	0.156002	0.811424	ANKRD13A
GO:0002430_complement_receptor_mediated_signaling_pathway	12	8.33	6.4	0.156002	0.811424	C5AR1
GO:0006367_transcription_initiation_from_RNA_polymerase_II_promoter	161	2.48	1.8	0.190865	0.811424	CDKN1A;CCNB1;CDK1;E2F2
GO:0006811_ion_transport	98	3.06	2.23	0.159167	0.811424	SLC15A2;SLC9A2;PLLP
GO:0006839_mitochondrial_transport	14	7.14	5.42	0.179531	0.811424	HSP90AA1
GO:0006898_receptor-mediated_endocytosis	95	3.16	2.3	0.149153	0.811424	HSP90AA1;HSPH1;LDLR
GO:0007171_activation_of_transmembrane_receptor_protein_tyrosine_kinase_activity	13	7.69	5.87	0.167849	0.811424	EGF
GO:0007173_epidermal_growth_factor_receptor_signaling_pathway	48	4.17	3.07	0.145742	0.811424	EGF;TGFA
GO:0007179_transforming_growth_factor_beta_receptor_signaling_pathway	103	2.91	2.12	0.176293	0.811424	ADAM9;FOS;GDF15
GO:0007204_positive_regulation_of_cytosolic_calcium_ion_concentration	149	2.68	1.95	0.157896	0.811424	S1PR3;F2RL1;C5AR1;CALCA
GO:0007267_cell-cell_signaling	216	2.31	1.67	0.188088	0.811424	NAMPT;GDF15;TEK;CXCL10;CD70
GO:0008272_sulfate_transport	12	8.33	6.4	0.156002	0.811424	RACGAP1
GO:0008631_intrinsic_apoptotic_signaling_pathway_in_response_to_oxidative_stress	14	7.14	5.42	0.179531	0.811424	MELK
GO:0010917_negative_regulation_of_mitochondrial_membrane_potential	14	7.14	5.42	0.179531	0.811424	PMAIP1
GO:0015701_bicarbonate_transport	42	4.76	3.53	0.117327	0.811424	CA2;CA14
GO:0016050_vesicle_organization	13	7.69	5.87	0.167849	0.811424	FBXO5
GO:0016055_Wnt_signaling_pathway	185	2.7	1.96	0.119887	0.811424	APCDD1;HMGXB4;DDIT3;CCNE1;WNT3A
GO:0016081_synaptic_vesicle_docking	11	9.09	7.04	0.143985	0.811424	STX3
GO:0021527_spinal_cord_association_neuron_differentiation	13	7.69	5.87	0.167849	0.811424	WNT3A
GO:0031629_synaptic_vesicle_fusion_to_presynaptic_active_zone_membrane	13	7.69	5.87	0.167849	0.811424	STX3
GO:0032088_negative_regulation_of_NF-kappaB_transcription_factor_activity	84	3.57	2.62	0.114385	0.811424	NFKBIA;TRAIP;TNFAIP3
GO:0032479_regulation_of_type_I_interferon_production	12	8.33	6.4	0.156002	0.811424	DTX4
GO:0032481_positive_regulation_of_type_I_interferon_production	51	3.92	2.88	0.160433	0.811424	NFKB1;NFKB2
GO:0032486_Rap_protein_signal_transduction	10	10	7.82	0.131799	0.811424	PLK2
GO:0032693_negative_regulation_of_interleukin-10_production	14	7.14	5.42	0.179531	0.811424	JAK3
GO:0032695_negative_regulation_of_interleukin-12_production	12	8.33	6.4	0.156002	0.811424	JAK3
GO:0032703_negative_regulation_of_interleukin-2_production	15	6.67	5.03	0.19105	0.811424	TNFAIP3
GO:0032727_positive_regulation_of_interferon-alpha_production	12	8.33	6.4	0.156002	0.811424	HSPD1
GO:0032801_receptor_catabolic_process	13	7.69	5.87	0.167849	0.811424	LGMN
GO:0032897_negative_regulation_of_viral_transcription	12	8.33	6.4	0.156002	0.811424	ZFP36
GO:0033147_negative_regulation_of_intracellular_estrogen_receptor_signaling_pathway	13	7.69	5.87	0.167849	0.811424	BRCA1
GO:0034142_toll-like_receptor_4_signaling_pathway	15	6.67	5.03	0.19105	0.811424	NFKBIA
GO:0035721_intraciliary_retrograde_transport	11	9.09	7.04	0.143985	0.811424	DYNLL1
GO:0035722_interleukin-12-mediated_signaling_pathway	47	4.26	3.13	0.14091	0.811424	LMNB1;PDCD4
GO:0035723_interleukin-15-mediated_signaling_pathway	13	7.69	5.87	0.167849	0.811424	JAK3
GO:0038084_vascular_endothelial_growth_factor_signaling_pathway	14	7.14	5.42	0.179531	0.811424	NRP2
GO:0038110_interleukin-2-mediated_signaling_pathway	11	9.09	7.04	0.143985	0.811424	JAK3
GO:0042994_cytoplasmic_sequestering_of_transcription_factor	11	9.09	7.04	0.143985	0.811424	NFKBIA
GO:0043124_negative_regulation_of_I-kappaB_kinase/NF-kappaB_signaling	48	4.17	3.07	0.145742	0.811424	OPTN;TNFAIP3
GO:0043518_negative_regulation_of_DNA_damage_response,_signal_transduction_by_p53_class_mediator	15	6.67	5.03	0.19105	0.811424	MDM2
GO:0045744_negative_regulation_of_G_protein-coupled_receptor_signaling_pathway	12	8.33	6.4	0.156002	0.811424	CXCL8
GO:0045824_negative_regulation_of_innate_immune_response	15	6.67	5.03	0.19105	0.811424	TNFAIP3
GO:0046328_regulation_of_JNK_cascade	15	6.67	5.03	0.19105	0.811424	F2RL1
GO:0046902_regulation_of_mitochondrial_membrane_permeability	11	9.09	7.04	0.143985	0.811424	PMAIP1
GO:0048096_chromatin-mediated_maintenance_of_transcription	11	9.09	7.04	0.143985	0.811424	CHEK1
GO:0050713_negative_regulation_of_interleukin-1_beta_secretion	13	7.69	5.87	0.167849	0.811424	TNFAIP3
GO:0050773_regulation_of_dendrite_development	15	6.67	5.03	0.19105	0.811424	CDC20
GO:0050776_regulation_of_immune_response	145	2.76	2	0.147417	0.811424	VCAM1;ICAM1;ULBP1;ICOSLG
GO:0051044_positive_regulation_of_membrane_protein_ectodomain_proteolysis	15	6.67	5.03	0.19105	0.811424	ADAM9
GO:0051560_mitochondrial_calcium_ion_homeostasis	15	6.67	5.03	0.19105	0.811424	MCUB
GO:0051926_negative_regulation_of_calcium_ion_transport	15	6.67	5.03	0.19105	0.811424	ICAM1
GO:0060088_auditory_receptor_cell_stereocilium_organization	11	9.09	7.04	0.143985	0.811424	MYO7A
GO:0060291_long-term_synaptic_potentiation	47	4.26	3.13	0.14091	0.811424	PLK2;STX3
GO:0060334_regulation_of_interferon-gamma-mediated_signaling_pathway	13	7.69	5.87	0.167849	0.811424	HSP90AB1
GO:0060395_SMAD_protein_signal_transduction	56	3.57	2.61	0.185461	0.811424	FOS;GDF15
GO:0061024_membrane_organization	132	3.03	2.21	0.1154	0.811424	HSPA8;LDLR;EGF;TGFA
GO:0061351_neural_precursor_cell_proliferation	11	9.09	7.04	0.143985	0.811424	MELK
GO:0070374_positive_regulation_of_ERK1_and_ERK2_cascade	212	2.36	1.71	0.178592	0.811424	CCL2;F2RL1;C5AR1;ICAM1;TEK
GO:0070498_interleukin-1-mediated_signaling_pathway	96	3.12	2.28	0.152468	0.811424	SQSTM1;NFKB1;NFKBIA
GO:0090179_planar_cell_polarity_pathway_involved_in_neural_tube_closure	12	8.33	6.4	0.156002	0.811424	GRHL3
GO:0090263_positive_regulation_of_canonical_Wnt_signaling_pathway	144	2.78	2.02	0.144841	0.811424	NFKB1;EGF;LYPD6;WNT3A
GO:0098719_sodium_ion_import_across_plasma_membrane	15	6.67	5.03	0.19105	0.811424	SLC9A2
GO:0099054_presynapse_assembly	13	7.69	5.87	0.167849	0.811424	WNT3A
GO:1900006_positive_regulation_of_dendrite_development	14	7.14	5.42	0.179531	0.811424	COBL
GO:1901222_regulation_of_NIK/NF-kappaB_signaling	12	8.33	6.4	0.156002	0.811424	NFKBIA
GO:1902043_positive_regulation_of_extrinsic_apoptotic_signaling_pathway_via_death_domain_receptors	11	9.09	7.04	0.143985	0.811424	PMAIP1
GO:1902176_negative_regulation_of_oxidative_stress-induced_intrinsic_apoptotic_signaling_pathway	13	7.69	5.87	0.167849	0.811424	HSPB1
GO:1902230_negative_regulation_of_intrinsic_apoptotic_signaling_pathway_in_response_to_DNA_damage	15	6.67	5.03	0.19105	0.811424	DDIAS
GO:2000178_negative_regulation_of_neural_precursor_cell_proliferation	12	8.33	6.4	0.156002	0.811424	PAX6
GO:2000484_positive_regulation_of_interleukin-8_secretion	15	6.67	5.03	0.19105	0.811424	F2RL1
GO:0007405_neuroblast_proliferation	16	6.25	4.69	0.202407	0.836172	RACGAP1
GO:0030705_cytoskeleton-dependent_intracellular_transport	16	6.25	4.69	0.202407	0.836172	TUBB
GO:0032731_positive_regulation_of_interleukin-1_beta_production	16	6.25	4.69	0.202407	0.836172	HSPB1
GO:0047496_vesicle_transport_along_microtubule	16	6.25	4.69	0.202407	0.836172	HAP1
GO:0071577_zinc_ion_transmembrane_transport	16	6.25	4.69	0.202407	0.836172	SLC30A2
GO:0030330_DNA_damage_response,_signal_transduction_by_p53_class_mediator	17	5.88	4.4	0.213605	0.849922	SESN2
GO:0048143_astrocyte_activation	17	5.88	4.4	0.213605	0.849922	C5AR1
GO:0060252_positive_regulation_of_glial_cell_proliferation	17	5.88	4.4	0.213605	0.849922	E2F1
GO:0060292_long-term_synaptic_depression	17	5.88	4.4	0.213605	0.849922	PLK2
GO:0090280_positive_regulation_of_calcium_ion_import	17	5.88	4.4	0.213605	0.849922	CCL2
GO:0099175_regulation_of_postsynapse_organization	17	5.88	4.4	0.213605	0.849922	NRP2
GO:1902041_regulation_of_extrinsic_apoptotic_signaling_pathway_via_death_domain_receptors	17	5.88	4.4	0.213605	0.849922	TNFRSF10B
GO:1901224_positive_regulation_of_NIK/NF-kappaB_signaling	62	3.23	2.35	0.216137	0.85104	PDCD4;TCIM
GO:1902600_proton_transmembrane_transport	114	2.63	1.91	0.215564	0.85104	SLC15A2;SLC9A2;ATP6V0D2
GO:0007041_lysosomal_transport	18	5.56	4.14	0.224646	0.860348	HSPA1A
GO:0007221_positive_regulation_of_transcription_of_Notch_receptor_target	18	5.56	4.14	0.224646	0.860348	DLGAP5
GO:0007224_smoothened_signaling_pathway	64	3.12	2.27	0.226467	0.860348	PAX6;STIL
GO:0010977_negative_regulation_of_neuron_projection_development	63	3.17	2.31	0.221297	0.860348	MDM2;WNT3A
GO:0048010_vascular_endothelial_growth_factor_receptor_signaling_pathway	64	3.12	2.27	0.226467	0.860348	HSP90AA1;NRP2
GO:1904262_negative_regulation_of_TORC1_signaling	18	5.56	4.14	0.224646	0.860348	SESN2
GO:2000649_regulation_of_sodium_ion_transmembrane_transporter_activity	18	5.56	4.14	0.224646	0.860348	PTPN3
GO:0030048_actin_filament-based_movement	19	5.26	3.91	0.235533	0.872856	MYO7A
GO:0030301_cholesterol_transport	19	5.26	3.91	0.235533	0.872856	LDLR
GO:0048663_neuron_fate_commitment	19	5.26	3.91	0.235533	0.872856	PAX6
GO:1902236_negative_regulation_of_endoplasmic_reticulum_stress-induced_intrinsic_apoptotic_signaling_pathway	19	5.26	3.91	0.235533	0.872856	HSPA1A
GO:2000251_positive_regulation_of_actin_cytoskeleton_reorganization	19	5.26	3.91	0.235533	0.872856	TEK
GO:0002756_MyD88-independent_toll-like_receptor_signaling_pathway	20	5	3.71	0.246267	0.890802	BIRC3
GO:0006509_membrane_protein_ectodomain_proteolysis	20	5	3.71	0.246267	0.890802	ADAM9
GO:0007130_synaptonemal_complex_assembly	20	5	3.71	0.246267	0.890802	TRIP13
GO:0023019_signal_transduction_involved_in_regulation_of_gene_expression	20	5	3.71	0.246267	0.890802	PAX6
GO:0050860_negative_regulation_of_T_cell_receptor_signaling_pathway	20	5	3.71	0.246267	0.890802	DUSP3
GO:0006355_regulation_of_transcription,_DNA-templated	492	1.83	1.32	0.256073	0.897531	FUS;E2F1;CDCA7L;DDIT3;CDCA7;NFKB2;TCF19;CHEK2;NFATC2
GO:0014066_regulation_of_phosphatidylinositol_3-kinase_signaling	21	4.76	3.52	0.256851	0.897531	CEP55
GO:0045088_regulation_of_innate_immune_response	21	4.76	3.52	0.256851	0.897531	BIRC3
GO:0045742_positive_regulation_of_epidermal_growth_factor_receptor_signaling_pathway	21	4.76	3.52	0.256851	0.897531	HAP1
GO:0050771_negative_regulation_of_axonogenesis	21	4.76	3.52	0.256851	0.897531	NGFR
GO:0060333_interferon-gamma-mediated_signaling_pathway	70	2.86	2.07	0.257625	0.897531	VCAM1;ICAM1
GO:1900016_negative_regulation_of_cytokine_production_involved_in_inflammatory_response	21	4.76	3.52	0.256851	0.897531	PDCD4
GO:2000179_positive_regulation_of_neural_precursor_cell_proliferation	21	4.76	3.52	0.256851	0.897531	WNT3A
GO:0002052_positive_regulation_of_neuroblast_proliferation	22	4.55	3.35	0.267286	0.898082	PAX6
GO:0009966_regulation_of_signal_transduction	22	4.55	3.35	0.267286	0.898082	GPC4
GO:0035584_calcium-mediated_signaling_using_intracellular_calcium_source	22	4.55	3.35	0.267286	0.898082	VCAM1
GO:0038096_Fc-gamma_receptor_signaling_pathway_involved_in_phagocytosis	71	2.82	2.04	0.26283	0.898082	HSP90AA1;HSP90AB1
GO:0045022_early_endosome_to_late_endosome_transport	22	4.55	3.35	0.267286	0.898082	EMP2
GO:0048278_vesicle_docking	22	4.55	3.35	0.267286	0.898082	STX3
GO:0070423_nucleotide-binding_oligomerization_domain_containing_signaling_pathway	22	4.55	3.35	0.267286	0.898082	TNFAIP3
GO:0090316_positive_regulation_of_intracellular_protein_transport	22	4.55	3.35	0.267286	0.898082	PLK3
GO:0002286_T_cell_activation_involved_in_immune_response	23	4.35	3.2	0.277576	0.90734	F2RL1
GO:0006851_mitochondrial_calcium_ion_transmembrane_transport	23	4.35	3.2	0.277576	0.90734	MCUB
GO:0007266_Rho_protein_signal_transduction	74	2.7	1.96	0.278443	0.90734	NGFR;PDPN
GO:0060070_canonical_Wnt_signaling_pathway	74	2.7	1.96	0.278443	0.90734	EGF;WNT3A
GO:0070373_negative_regulation_of_ERK1_and_ERK2_cascade	74	2.7	1.96	0.278443	0.90734	DUSP3;ATF3
GO:0097150_neuronal_stem_cell_population_maintenance	23	4.35	3.2	0.277576	0.90734	FANCD2
GO:0099560_synaptic_membrane_adhesion	23	4.35	3.2	0.277576	0.90734	GPC4
GO:0001819_positive_regulation_of_cytokine_production	24	4.17	3.06	0.287721	0.93355	WNT3A
GO:0007026_negative_regulation_of_microtubule_depolymerization	25	4	2.93	0.297724	0.945713	CKAP2
GO:0030512_negative_regulation_of_transforming_growth_factor_beta_receptor_signaling_pathway	77	2.6	1.88	0.294034	0.945713	LDLRAD4;HSPA1A
GO:0032733_positive_regulation_of_interleukin-10_production	25	4	2.93	0.297724	0.945713	HSPD1
GO:0032735_positive_regulation_of_interleukin-12_production	25	4	2.93	0.297724	0.945713	HSPD1
GO:0043409_negative_regulation_of_MAPK_cascade	25	4	2.93	0.297724	0.945713	DUSP3
GO:0048843_negative_regulation_of_axon_extension_involved_in_axon_guidance	26	3.85	2.82	0.307587	0.972954	WNT3A
GO:0019722_calcium-mediated_signaling	80	2.5	1.81	0.309577	0.975167	CXCL8;SELE
GO:0007010_cytoskeleton_organization	140	2.14	1.54	0.313579	0.983677	CCL2;DIAPH3;TNFAIP3
GO:0007264_small_GTPase_mediated_signal_transduction	82	2.44	1.76	0.319901	0.995247	DOCK6;RRAD
GO:1903508_positive_regulation_of_nucleic_acid-templated_transcription	82	2.44	1.76	0.319901	0.995247	FUS;PSMC3IP
GO:0001508_action_potential	16	0	0	1	1
GO:0001755_neural_crest_cell_migration	47	0	0	1	1
GO:0001764_neuron_migration	108	1.85	1.33	0.448865	1	PAX6;MATN2
GO:0001771_immunological_synapse_formation	11	0	0	1	1
GO:0001817_regulation_of_cytokine_production	11	0	0	1	1
GO:0001818_negative_regulation_of_cytokine_production	14	0	0	1	1
GO:0001881_receptor_recycling	11	0	0	1	1
GO:0001921_positive_regulation_of_receptor_recycling	15	0	0	1	1
GO:0001963_synaptic_transmission,_dopaminergic	15	0	0	1	1
GO:0002028_regulation_of_sodium_ion_transport	18	0	0	1	1
GO:0002031_G_protein-coupled_receptor_internalization	13	0	0	1	1
GO:0002218_activation_of_innate_immune_response	24	0	0	1	1
GO:0002223_stimulatory_C-type_lectin_receptor_signaling_pathway	112	1.79	1.28	0.467522	1	NFKB1;RELB
GO:0002224_toll-like_receptor_signaling_pathway	43	2.33	1.67	0.455618	1	LGMN
GO:0002227_innate_immune_response_in_mucosa	24	0	0	1	1
GO:0002250_adaptive_immune_response	170	1.18	0.84	0.691465	1	JAK3;ICOSLG
GO:0002323_natural_killer_cell_activation_involved_in_immune_response	19	0	0	1	1
GO:0002376_immune_system_process	31	3.23	2.35	0.354869	1	SQSTM1
GO:0002377_immunoglobulin_production	9	0	0	1	1
GO:0002755_MyD88-dependent_toll-like_receptor_signaling_pathway	32	3.12	2.27	0.363931	1	HSPD1
GO:0003407_neural_retina_development	15	0	0	1	1
GO:0005513_detection_of_calcium_ion	13	0	0	1	1
GO:0006120_mitochondrial_electron_transport,_NADH_to_ubiquinone	49	0	0	1	1
GO:0006122_mitochondrial_electron_transport,_ubiquinol_to_cytochrome_c	14	0	0	1	1
GO:0006123_mitochondrial_electron_transport,_cytochrome_c_to_oxygen	20	0	0	1	1
GO:0006351_transcription,_DNA-templated	103	0.97	0.69	0.767361	1	E2F1
GO:0006352_DNA-templated_transcription,_initiation	30	0	0	1	1
GO:0006357_regulation_of_transcription_by_RNA_polymerase_II	1146	1.57	1.13	0.345569	1	FUS;HSPD1;CDKN1A;TFDP1;MYBL2;RFX5;ZNF44;ATAD2;FOS;CKS2;BRCA1;WDHD1;ETV4;BRIP1;ZNF367;ZNF442;GRHL3;TGFA
GO:0006361_transcription_initiation_from_RNA_polymerase_I_promoter	31	0	0	1	1
GO:0006362_transcription_elongation_from_RNA_polymerase_I_promoter	29	0	0	1	1
GO:0006363_termination_of_RNA_polymerase_I_transcription	30	0	0	1	1
GO:0006368_transcription_elongation_from_RNA_polymerase_II_promoter	74	0	0	1	1
GO:0006369_termination_of_RNA_polymerase_II_transcription	34	0	0	1	1
GO:0006383_transcription_by_RNA_polymerase_III	33	0	0	1	1
GO:0006390_mitochondrial_transcription	11	0	0	1	1
GO:0006465_signal_peptide_processing	11	0	0	1	1
GO:0006612_protein_targeting_to_membrane	47	0	0	1	1
GO:0006614_SRP-dependent_cotranslational_protein_targeting_to_membrane	89	0	0	1	1
GO:0006617_SRP-dependent_cotranslational_protein_targeting_to_membrane,_signal_sequence_recognition	10	0	0	1	1
GO:0006812_cation_transport	35	0	0	1	1
GO:0006813_potassium_ion_transport	69	1.45	1.03	0.623287	1	CDK2
GO:0006814_sodium_ion_transport	81	0	0	1	1
GO:0006816_calcium_ion_transport	73	0	0	1	1
GO:0006820_anion_transport	11	0	0	1	1
GO:0006821_chloride_transport	32	0	0	1	1
GO:0006825_copper_ion_transport	14	0	0	1	1
GO:0006826_iron_ion_transport	17	0	0	1	1
GO:0006833_water_transport	15	0	0	1	1
GO:0006836_neurotransmitter_transport	16	0	0	1	1
GO:0006865_amino_acid_transport	37	2.7	1.95	0.407375	1	SLC6A12
GO:0006869_lipid_transport	61	1.64	1.17	0.578085	1	ABCA13
GO:0006874_cellular_calcium_ion_homeostasis	94	0	0	1	1
GO:0006886_intracellular_protein_transport	307	1.3	0.93	0.627224	1	NGFR;STX3;MYO7A;SYTL4
GO:0006891_intra-Golgi_vesicle-mediated_transport	31	0	0	1	1
GO:0006892_post-Golgi_vesicle-mediated_transport	18	0	0	1	1
GO:0006893_Golgi_to_plasma_membrane_transport	26	0	0	1	1
GO:0006895_Golgi_to_endosome_transport	15	0	0	1	1
GO:0006900_vesicle_budding_from_membrane	11	0	0	1	1
GO:0006904_vesicle_docking_involved_in_exocytosis	31	0	0	1	1
GO:0006906_vesicle_fusion	29	3.45	2.51	0.336356	1	STX3
GO:0006913_nucleocytoplasmic_transport	22	0	0	1	1
GO:0006959_humoral_immune_response	56	1.79	1.28	0.547127	1	CCL2
GO:0007009_plasma_membrane_organization	16	0	0	1	1
GO:0007015_actin_filament_organization	92	2.17	1.56	0.370844	1	PDLIM3;EMP2
GO:0007020_microtubule_nucleation	17	0	0	1	1
GO:0007156_homophilic_cell_adhesion_via_plasma_membrane_adhesion_molecules	167	0	0	1	1
GO:0007158_neuron_cell-cell_adhesion	16	0	0	1	1
GO:0007169_transmembrane_receptor_protein_tyrosine_kinase_signaling_pathway	106	0.94	0.67	0.777054	1	TEK
GO:0007175_negative_regulation_of_epidermal_growth_factor-activated_receptor_activity	14	0	0	1	1
GO:0007186_G_protein-coupled_receptor_signaling_pathway	1091	0.82	0.57	0.971435	1	CCL2;S1PR3;F2RL1;C5AR1;CXCL3;CXCL10;CXCL2;CALCA;CXCL8
GO:0007187_G_protein-coupled_receptor_signaling_pathway,_coupled_to_cyclic_nucleotide_second_messenger	63	1.59	1.13	0.589869	1	CCL2
GO:0007188_adenylate_cyclase-modulating_G_protein-coupled_receptor_signaling_pathway	54	0	0	1	1
GO:0007189_adenylate_cyclase-activating_G_protein-coupled_receptor_signaling_pathway	100	2	1.44	0.410486	1	CXCL10;CALCA
GO:0007193_adenylate_cyclase-inhibiting_G_protein-coupled_receptor_signaling_pathway	59	1.69	1.21	0.565964	1	S1PR3
GO:0007200_phospholipase_C-activating_G_protein-coupled_receptor_signaling_pathway	57	1.75	1.26	0.553495	1	C5AR1
GO:0007205_protein_kinase_C-activating_G_protein-coupled_receptor_signaling_pathway	28	0	0	1	1
GO:0007212_dopamine_receptor_signaling_pathway	15	0	0	1	1
GO:0007213_G_protein-coupled_acetylcholine_receptor_signaling_pathway	15	0	0	1	1
GO:0007214_gamma-aminobutyric_acid_signaling_pathway	25	0	0	1	1
GO:0007215_glutamate_receptor_signaling_pathway	16	0	0	1	1
GO:0007216_G_protein-coupled_glutamate_receptor_signaling_pathway	15	0	0	1	1
GO:0007218_neuropeptide_signaling_pathway	103	0.97	0.69	0.767361	1	GALP
GO:0007219_Notch_signaling_pathway	111	1.8	1.29	0.462893	1	DTX4;S1PR3
GO:0007223_Wnt_signaling_pathway,_calcium_modulating_pathway	37	2.7	1.95	0.407375	1	NFATC1
GO:0007229_integrin-mediated_signaling_pathway	91	1.1	0.78	0.724201	1	ADAM9
GO:0007254_JNK_cascade	48	0	0	1	1
GO:0007263_nitric_oxide_mediated_signal_transduction	19	0	0	1	1
GO:0007268_chemical_synaptic_transmission	238	0.42	0.29	0.965891	1	HAP1
GO:0007269_neurotransmitter_secretion	48	2.08	1.5	0.492814	1	HSPA8
GO:0007271_synaptic_transmission,_cholinergic	24	0	0	1	1
GO:0007274_neuromuscular_synaptic_transmission	29	0	0	1	1
GO:0007288_sperm_axoneme_assembly	12	0	0	1	1
GO:0007342_fusion_of_sperm_to_egg_plasma_membrane_involved_in_single_fertilization	16	0	0	1	1
GO:0007409_axonogenesis	78	0	0	1	1
GO:0007411_axon_guidance	205	1.95	1.4	0.32479	1	NRP2;PAX6;MATN2;WNT3A
GO:0007413_axonal_fasciculation	20	0	0	1	1
GO:0007416_synapse_assembly	62	0	0	1	1
GO:0007528_neuromuscular_junction_development	30	0	0	1	1
GO:0008045_motor_neuron_axon_guidance	23	0	0	1	1
GO:0008154_actin_polymerization_or_depolymerization	13	0	0	1	1
GO:0008277_regulation_of_G_protein-coupled_receptor_signaling_pathway	40	0	0	1	1
GO:0008286_insulin_receptor_signaling_pathway	82	1.22	0.87	0.686668	1	ATP6V0D2
GO:0008333_endosome_to_lysosome_transport	45	2.22	1.6	0.470812	1	HMGXB4
GO:0008543_fibroblast_growth_factor_receptor_signaling_pathway	78	1.28	0.91	0.668391	1	SHCBP1
GO:0008589_regulation_of_smoothened_signaling_pathway	21	0	0	1	1
GO:0008593_regulation_of_Notch_signaling_pathway	16	0	0	1	1
GO:0008643_carbohydrate_transport	23	0	0	1	1
GO:0008645_hexose_transmembrane_transport	13	0	0	1	1
GO:0009303_rRNA_transcription	13	0	0	1	1
GO:0009755_hormone-mediated_signaling_pathway	47	0	0	1	1
GO:0009967_positive_regulation_of_signal_transduction	65	0	0	1	1
GO:0009968_negative_regulation_of_signal_transduction	41	0	0	1	1
GO:0010001_glial_cell_differentiation	14	0	0	1	1
GO:0010248_establishment_or_maintenance_of_transmembrane_electrochemical_gradient	14	0	0	1	1
GO:0010469_regulation_of_signaling_receptor_activity	17	0	0	1	1
GO:0010524_positive_regulation_of_calcium_ion_transport_into_cytosol	12	0	0	1	1
GO:0010608_posttranscriptional_regulation_of_gene_expression	24	0	0	1	1
GO:0010737_protein_kinase_A_signaling	13	0	0	1	1
GO:0010738_regulation_of_protein_kinase_A_signaling	11	0	0	1	1
GO:0010765_positive_regulation_of_sodium_ion_transport	16	0	0	1	1
GO:0010880_regulation_of_release_of_sequestered_calcium_ion_into_cytosol_by_sarcoplasmic_reticulum	20	0	0	1	1
GO:0010881_regulation_of_cardiac_muscle_contraction_by_regulation_of_the_release_of_sequestered_calcium_ion	24	0	0	1	1
GO:0010975_regulation_of_neuron_projection_development	25	0	0	1	1
GO:0010976_positive_regulation_of_neuron_projection_development	107	0	0	1	1
GO:0014002_astrocyte_development	15	0	0	1	1
GO:0014032_neural_crest_cell_development	20	0	0	1	1
GO:0014065_phosphatidylinositol_3-kinase_signaling	33	0	0	1	1
GO:0014067_negative_regulation_of_phosphatidylinositol_3-kinase_signaling	16	0	0	1	1
GO:0014068_positive_regulation_of_phosphatidylinositol_3-kinase_signaling	87	2.3	1.66	0.345534	1	F2RL1;TEK
GO:0015031_protein_transport	310	1.29	0.92	0.634797	1	CENPF;KIF20A;SLC15A2;ATG16L2
GO:0015671_oxygen_transport	15	0	0	1	1
GO:0015693_magnesium_ion_transport	13	0	0	1	1
GO:0015695_organic_cation_transport	11	0	0	1	1
GO:0015698_inorganic_anion_transport	24	0	0	1	1
GO:0015711_organic_anion_transport	14	0	0	1	1
GO:0015718_monocarboxylic_acid_transport	13	0	0	1	1
GO:0015721_bile_acid_and_bile_salt_transport	26	0	0	1	1
GO:0015804_neutral_amino_acid_transport	13	0	0	1	1
GO:0015813_L-glutamate_transmembrane_transport	15	0	0	1	1
GO:0015867_ATP_transport	12	0	0	1	1
GO:0015909_long-chain_fatty_acid_transport	14	0	0	1	1
GO:0015914_phospholipid_transport	28	3.57	2.61	0.326901	1	LDLR
GO:0015918_sterol_transport	14	0	0	1	1
GO:0015986_ATP_synthesis_coupled_proton_transport	12	0	0	1	1
GO:0016056_rhodopsin_mediated_signaling_pathway	11	0	0	1	1
GO:0016064_immunoglobulin_mediated_immune_response	13	0	0	1	1
GO:0016079_synaptic_vesicle_exocytosis	25	0	0	1	1
GO:0016082_synaptic_vesicle_priming	15	0	0	1	1
GO:0016192_vesicle-mediated_transport	134	1.49	1.06	0.563012	1	HSPA8;KIF20A
GO:0016197_endosomal_transport	76	1.32	0.94	0.658858	1	SQSTM1
GO:0016254_preassembly_of_GPI_anchor_in_ER_membrane	17	0	0	1	1
GO:0016322_neuron_remodeling	12	0	0	1	1
GO:0016338_calcium-independent_cell-cell_adhesion_via_plasma_membrane_cell-adhesion_molecules	21	0	0	1	1
GO:0016339_calcium-dependent_cell-cell_adhesion_via_plasma_membrane_cell_adhesion_molecules	46	0	0	1	1
GO:0016358_dendrite_development	35	0	0	1	1
GO:0016601_Rac_protein_signal_transduction	21	0	0	1	1
GO:0017015_regulation_of_transforming_growth_factor_beta_receptor_signaling_pathway	20	0	0	1	1
GO:0017158_regulation_of_calcium_ion-dependent_exocytosis	18	0	0	1	1
GO:0019083_viral_transcription	109	0	0	1	1
GO:0019226_transmission_of_nerve_impulse	19	0	0	1	1
GO:0019228_neuronal_action_potential	29	0	0	1	1
GO:0019933_cAMP-mediated_signaling	27	0	0	1	1
GO:0019934_cGMP-mediated_signaling	23	0	0	1	1
GO:0021522_spinal_cord_motor_neuron_differentiation	17	0	0	1	1
GO:0021895_cerebral_cortex_neuron_differentiation	12	0	0	1	1
GO:0021915_neural_tube_development	28	3.57	2.61	0.326901	1	STIL
GO:0021954_central_nervous_system_neuron_development	13	0	0	1	1
GO:0022008_neurogenesis	45	2.22	1.6	0.470812	1	HAP1
GO:0022400_regulation_of_rhodopsin_mediated_signaling_pathway	26	0	0	1	1
GO:0022900_electron_transport_chain	69	0	0	1	1
GO:0022904_respiratory_electron_transport_chain	15	0	0	1	1
GO:0023014_signal_transduction_by_protein_phosphorylation	49	0	0	1	1
GO:0030030_cell_projection_organization	37	2.7	1.95	0.407375	1	HAP1
GO:0030031_cell_projection_assembly	18	0	0	1	1
GO:0030036_actin_cytoskeleton_organization	150	1.33	0.95	0.624388	1	PDLIM3;DIAPH3
GO:0030111_regulation_of_Wnt_signaling_pathway	26	0	0	1	1
GO:0030177_positive_regulation_of_Wnt_signaling_pathway	36	2.78	2.01	0.39893	1	TNFAIP3
GO:0030182_neuron_differentiation	134	0.75	0.53	0.850173	1	WNT3A
GO:0030322_stabilization_of_membrane_potential	17	0	0	1	1
GO:0030511_positive_regulation_of_transforming_growth_factor_beta_receptor_signaling_pathway	29	3.45	2.51	0.336356	1	HSP90AB1
GO:0030513_positive_regulation_of_BMP_signaling_pathway	33	0	0	1	1
GO:0030514_negative_regulation_of_BMP_signaling_pathway	50	2	1.44	0.506973	1	CHRDL1
GO:0030516_regulation_of_axon_extension	14	0	0	1	1
GO:0030517_negative_regulation_of_axon_extension	16	0	0	1	1
GO:0030520_intracellular_estrogen_receptor_signaling_pathway	21	0	0	1	1
GO:0030522_intracellular_receptor_signaling_pathway	34	0	0	1	1
GO:0030833_regulation_of_actin_filament_polymerization	23	0	0	1	1
GO:0030837_negative_regulation_of_actin_filament_polymerization	16	0	0	1	1
GO:0030838_positive_regulation_of_actin_filament_polymerization	53	1.89	1.35	0.527475	1	ICAM1
GO:0030866_cortical_actin_cytoskeleton_organization	27	0	0	1	1
GO:0030948_negative_regulation_of_vascular_endothelial_growth_factor_receptor_signaling_pathway	13	0	0	1	1
GO:0030949_positive_regulation_of_vascular_endothelial_growth_factor_receptor_signaling_pathway	19	0	0	1	1
GO:0030950_establishment_or_maintenance_of_actin_cytoskeleton_polarity	12	0	0	1	1
GO:0030970_retrograde_protein_transport,_ER_to_cytosol	16	0	0	1	1
GO:0031098_stress-activated_protein_kinase_signaling_cascade	50	0	0	1	1
GO:0031103_axon_regeneration	16	0	0	1	1
GO:0031113_regulation_of_microtubule_polymerization	11	0	0	1	1
GO:0031115_negative_regulation_of_microtubule_polymerization	13	0	0	1	1
GO:0031116_positive_regulation_of_microtubule_polymerization	26	0	0	1	1
GO:0031122_cytoplasmic_microtubule_organization	43	2.33	1.67	0.455618	1	PLK3
GO:0031175_neuron_projection_development	117	0.85	0.6	0.809274	1	STX3
GO:0031290_retinal_ganglion_cell_axon_guidance	19	0	0	1	1
GO:0031532_actin_cytoskeleton_reorganization	56	0	0	1	1
GO:0031623_receptor_internalization	40	2.5	1.8	0.432007	1	CXCL8
GO:0031665_negative_regulation_of_lipopolysaccharide-mediated_signaling_pathway	11	0	0	1	1
GO:0031929_TOR_signaling	19	0	0	1	1
GO:0032006_regulation_of_TOR_signaling	18	0	0	1	1
GO:0032007_negative_regulation_of_TOR_signaling	35	0	0	1	1
GO:0032008_positive_regulation_of_TOR_signaling	33	3.03	2.2	0.372867	1	WDR59
GO:0032012_regulation_of_ARF_protein_signal_transduction	17	0	0	1	1
GO:0032228_regulation_of_synaptic_transmission,_GABAergic	14	0	0	1	1
GO:0032233_positive_regulation_of_actin_filament_bundle_assembly	13	0	0	1	1
GO:0032367_intracellular_cholesterol_transport	11	0	0	1	1
GO:0032402_melanosome_transport	21	0	0	1	1
GO:0032469_endoplasmic_reticulum_calcium_ion_homeostasis	15	0	0	1	1
GO:0032480_negative_regulation_of_type_I_interferon_production	31	3.23	2.35	0.354869	1	TNFAIP3
GO:0032482_Rab_protein_signal_transduction	70	0	0	1	1
GO:0032509_endosome_transport_via_multivesicular_body_sorting_pathway	12	0	0	1	1
GO:0032689_negative_regulation_of_interferon-gamma_production	28	0	0	1	1
GO:0032691_negative_regulation_of_interleukin-1_beta_production	15	0	0	1	1
GO:0032700_negative_regulation_of_interleukin-17_production	14	0	0	1	1
GO:0032715_negative_regulation_of_interleukin-6_production	34	2.94	2.13	0.381678	1	TNFAIP3
GO:0032722_positive_regulation_of_chemokine_production	19	0	0	1	1
GO:0032728_positive_regulation_of_interferon-beta_production	26	0	0	1	1
GO:0032729_positive_regulation_of_interferon-gamma_production	45	2.22	1.6	0.470812	1	HSPD1
GO:0032740_positive_regulation_of_interleukin-17_production	14	0	0	1	1
GO:0032743_positive_regulation_of_interleukin-2_production	14	0	0	1	1
GO:0032753_positive_regulation_of_interleukin-4_production	21	0	0	1	1
GO:0032755_positive_regulation_of_interleukin-6_production	58	1.72	1.23	0.559773	1	HSPD1
GO:0032786_positive_regulation_of_DNA-templated_transcription,_elongation	15	0	0	1	1
GO:0032793_positive_regulation_of_CREB_transcription_factor_activity	19	0	0	1	1
GO:0032874_positive_regulation_of_stress-activated_MAPK_cascade	17	0	0	1	1
GO:0032924_activin_receptor_signaling_pathway	17	0	0	1	1
GO:0032956_regulation_of_actin_cytoskeleton_organization	68	1.47	1.05	0.617913	1	GRHL3
GO:0032968_positive_regulation_of_transcription_elongation_from_RNA_polymerase_II_promoter	18	0	0	1	1
GO:0033146_regulation_of_intracellular_estrogen_receptor_signaling_pathway	15	0	0	1	1
GO:0033148_positive_regulation_of_intracellular_estrogen_receptor_signaling_pathway	11	0	0	1	1
GO:0033572_transferrin_transport	36	2.78	2.01	0.39893	1	ATP6V0D2
GO:0034122_negative_regulation_of_toll-like_receptor_signaling_pathway	17	0	0	1	1
GO:0034162_toll-like_receptor_9_signaling_pathway	16	0	0	1	1
GO:0034220_ion_transmembrane_transport	254	1.18	0.84	0.694147	1	CLCN2;ABCA13;ATP6V0D2
GO:0034244_negative_regulation_of_transcription_elongation_from_RNA_polymerase_II_promoter	12	0	0	1	1
GO:0034314_Arp2/3_complex-mediated_actin_nucleation	19	0	0	1	1
GO:0034341_response_to_interferon-gamma	22	0	0	1	1
GO:0034453_microtubule_anchoring	15	0	0	1	1
GO:0034765_regulation_of_ion_transmembrane_transport	113	0.88	0.63	0.798134	1	CLCN2
GO:0035023_regulation_of_Rho_protein_signal_transduction	84	0	0	1	1
GO:0035024_negative_regulation_of_Rho_protein_signal_transduction	22	0	0	1	1
GO:0035025_positive_regulation_of_Rho_protein_signal_transduction	29	3.45	2.51	0.336356	1	F2RL1
GO:0035082_axoneme_assembly	18	0	0	1	1
GO:0035235_ionotropic_glutamate_receptor_signaling_pathway	23	0	0	1	1
GO:0035249_synaptic_transmission,_glutamatergic	28	0	0	1	1
GO:0035329_hippo_signaling	27	0	0	1	1
GO:0035418_protein_localization_to_synapse	12	0	0	1	1
GO:0035435_phosphate_ion_transmembrane_transport	14	0	0	1	1
GO:0035457_cellular_response_to_interferon-alpha	11	0	0	1	1
GO:0035458_cellular_response_to_interferon-beta	19	0	0	1	1
GO:0035567_non-canonical_Wnt_signaling_pathway	20	0	0	1	1
GO:0035589_G_protein-coupled_purinergic_nucleotide_receptor_signaling_pathway	13	0	0	1	1
GO:0035666_TRIF-dependent_toll-like_receptor_signaling_pathway	29	3.45	2.51	0.336356	1	BIRC3
GO:0035725_sodium_ion_transmembrane_transport	66	0	0	1	1
GO:0036376_sodium_ion_export_across_plasma_membrane	13	0	0	1	1
GO:0038111_interleukin-7-mediated_signaling_pathway	30	3.33	2.43	0.345678	1	JAK3
GO:0038180_nerve_growth_factor_signaling_pathway	12	0	0	1	1
GO:0040037_negative_regulation_of_fibroblast_growth_factor_receptor_signaling_pathway	20	0	0	1	1
GO:0042073_intraciliary_transport	26	0	0	1	1
GO:0042136_neurotransmitter_biosynthetic_process	11	0	0	1	1
GO:0042147_retrograde_transport,_endosome_to_Golgi	77	0	0	1	1
GO:0042391_regulation_of_membrane_potential	101	0	0	1	1
GO:0042551_neuron_maturation	14	0	0	1	1
GO:0042776_mitochondrial_ATP_synthesis_coupled_proton_transport	21	0	0	1	1
GO:0042795_snRNA_transcription_by_RNA_polymerase_II	70	0	0	1	1
GO:0042953_lipoprotein_transport	14	0	0	1	1
GO:0043001_Golgi_to_plasma_membrane_protein_transport	29	3.45	2.51	0.336356	1	OPTN
GO:0043113_receptor_clustering	25	0	0	1	1
GO:0043252_sodium-independent_organic_anion_transport	16	0	0	1	1
GO:0043401_steroid_hormone_mediated_signaling_pathway	52	0	0	1	1
GO:0043408_regulation_of_MAPK_cascade	59	1.69	1.21	0.565964	1	GDF15
GO:0043410_positive_regulation_of_MAPK_cascade	103	0.97	0.69	0.767361	1	GDF15
GO:0043433_negative_regulation_of_DNA-binding_transcription_factor_activity	73	1.37	0.98	0.644043	1	DDIT3
GO:0043523_regulation_of_neuron_apoptotic_process	17	0	0	1	1
GO:0043568_positive_regulation_of_insulin-like_growth_factor_receptor_signaling_pathway	13	0	0	1	1
GO:0043691_reverse_cholesterol_transport	16	0	0	1	1
GO:0043922_negative_regulation_by_host_of_viral_transcription	12	0	0	1	1
GO:0043923_positive_regulation_by_host_of_viral_transcription	17	0	0	1	1
GO:0043950_positive_regulation_of_cAMP-mediated_signaling	15	0	0	1	1
GO:0043951_negative_regulation_of_cAMP-mediated_signaling	14	0	0	1	1
GO:0045010_actin_nucleation	11	0	0	1	1
GO:0045078_positive_regulation_of_interferon-gamma_biosynthetic_process	13	0	0	1	1
GO:0045080_positive_regulation_of_chemokine_biosynthetic_process	11	0	0	1	1
GO:0045086_positive_regulation_of_interleukin-2_biosynthetic_process	13	0	0	1	1
GO:0045087_innate_immune_response	392	0.77	0.54	0.914735	1	OPTN;F2RL1;JAK3
GO:0045089_positive_regulation_of_innate_immune_response	23	0	0	1	1
GO:0045104_intermediate_filament_cytoskeleton_organization	22	0	0	1	1
GO:0045410_positive_regulation_of_interleukin-6_biosynthetic_process	15	0	0	1	1
GO:0045416_positive_regulation_of_interleukin-8_biosynthetic_process	12	0	0	1	1
GO:0045494_photoreceptor_cell_maintenance	38	0	0	1	1
GO:0045664_regulation_of_neuron_differentiation	22	0	0	1	1
GO:0045665_negative_regulation_of_neuron_differentiation	60	1.67	1.19	0.572067	1	PAX6
GO:0045666_positive_regulation_of_neuron_differentiation	84	0	0	1	1
GO:0045745_positive_regulation_of_G_protein-coupled_receptor_signaling_pathway	14	0	0	1	1
GO:0045747_positive_regulation_of_Notch_signaling_pathway	51	1.96	1.41	0.513904	1	NOV
GO:0045773_positive_regulation_of_axon_extension	34	0	0	1	1
GO:0045879_negative_regulation_of_smoothened_signaling_pathway	24	0	0	1	1
GO:0045880_positive_regulation_of_smoothened_signaling_pathway	29	0	0	1	1
GO:0045943_positive_regulation_of_transcription_by_RNA_polymerase_I	12	0	0	1	1
GO:0045956_positive_regulation_of_calcium_ion-dependent_exocytosis	16	0	0	1	1
GO:0046579_positive_regulation_of_Ras_protein_signal_transduction	29	0	0	1	1
GO:0046580_negative_regulation_of_Ras_protein_signal_transduction	27	0	0	1	1
GO:0046626_regulation_of_insulin_receptor_signaling_pathway	12	0	0	1	1
GO:0046627_negative_regulation_of_insulin_receptor_signaling_pathway	36	0	0	1	1
GO:0046628_positive_regulation_of_insulin_receptor_signaling_pathway	22	0	0	1	1
GO:0046907_intracellular_transport	18	0	0	1	1
GO:0046928_regulation_of_neurotransmitter_secretion	19	0	0	1	1
GO:0048008_platelet-derived_growth_factor_receptor_signaling_pathway	30	3.33	2.43	0.345678	1	CSRNP1
GO:0048009_insulin-like_growth_factor_receptor_signaling_pathway	13	0	0	1	1
GO:0048012_hepatocyte_growth_factor_receptor_signaling_pathway	12	0	0	1	1
GO:0048013_ephrin_receptor_signaling_pathway	85	0	0	1	1
GO:0048015_phosphatidylinositol-mediated_signaling	50	0	0	1	1
GO:0048016_inositol_phosphate-mediated_signaling	12	0	0	1	1
GO:0048167_regulation_of_synaptic_plasticity	48	2.08	1.5	0.492814	1	PLK2
GO:0048168_regulation_of_neuronal_synaptic_plasticity	15	0	0	1	1
GO:0048169_regulation_of_long-term_neuronal_synaptic_plasticity	21	0	0	1	1
GO:0048172_regulation_of_short-term_neuronal_synaptic_plasticity	14	0	0	1	1
GO:0048208_COPII_vesicle_coating	63	1.59	1.13	0.589869	1	TGFA
GO:0048260_positive_regulation_of_receptor-mediated_endocytosis	22	0	0	1	1
GO:0048384_retinoic_acid_receptor_signaling_pathway	15	0	0	1	1
GO:0048488_synaptic_vesicle_endocytosis	35	0	0	1	1
GO:0048489_synaptic_vesicle_transport	15	0	0	1	1
GO:0048490_anterograde_synaptic_vesicle_transport	16	0	0	1	1
GO:0048665_neuron_fate_specification	16	0	0	1	1
GO:0048666_neuron_development	53	0	0	1	1
GO:0048681_negative_regulation_of_axon_regeneration	11	0	0	1	1
GO:0048711_positive_regulation_of_astrocyte_differentiation	11	0	0	1	1
GO:0048791_calcium_ion-regulated_exocytosis_of_neurotransmitter	14	0	0	1	1
GO:0048812_neuron_projection_morphogenesis	60	0	0	1	1
GO:0048813_dendrite_morphogenesis	35	0	0	1	1
GO:0048814_regulation_of_dendrite_morphogenesis	21	0	0	1	1
GO:0050434_positive_regulation_of_viral_transcription	27	0	0	1	1
GO:0050710_negative_regulation_of_cytokine_secretion	15	0	0	1	1
GO:0050715_positive_regulation_of_cytokine_secretion	27	0	0	1	1
GO:0050718_positive_regulation_of_interleukin-1_beta_secretion	33	0	0	1	1
GO:0050767_regulation_of_neurogenesis	33	0	0	1	1
GO:0050770_regulation_of_axonogenesis	20	0	0	1	1
GO:0050772_positive_regulation_of_axonogenesis	32	3.12	2.27	0.363931	1	NGFR
GO:0050775_positive_regulation_of_dendrite_morphogenesis	21	0	0	1	1
GO:0050777_negative_regulation_of_immune_response	13	0	0	1	1
GO:0050804_modulation_of_chemical_synaptic_transmission	57	1.75	1.26	0.553495	1	WNT3A
GO:0050806_positive_regulation_of_synaptic_transmission	18	0	0	1	1
GO:0050808_synapse_organization	39	0	0	1	1
GO:0050848_regulation_of_calcium-mediated_signaling	12	0	0	1	1
GO:0050850_positive_regulation_of_calcium-mediated_signaling	17	0	0	1	1
GO:0050852_T_cell_receptor_signaling_pathway	165	1.21	0.86	0.675679	1	NFKB1;ICOSLG
GO:0050853_B_cell_receptor_signaling_pathway	35	2.86	2.07	0.390364	1	NFATC2
GO:0050855_regulation_of_B_cell_receptor_signaling_pathway	11	0	0	1	1
GO:0050862_positive_regulation_of_T_cell_receptor_signaling_pathway	14	0	0	1	1
GO:0050884_neuromuscular_process_controlling_posture	12	0	0	1	1
GO:0050885_neuromuscular_process_controlling_balance	45	0	0	1	1
GO:0050905_neuromuscular_process	19	0	0	1	1
GO:0051013_microtubule_severing	11	0	0	1	1
GO:0051016_barbed-end_actin_filament_capping	15	0	0	1	1
GO:0051017_actin_filament_bundle_assembly	40	2.5	1.8	0.432007	1	AIF1L
GO:0051024_positive_regulation_of_immunoglobulin_secretion	11	0	0	1	1
GO:0051028_mRNA_transport	43	2.33	1.67	0.455618	1	ZFP36
GO:0051056_regulation_of_small_GTPase_mediated_signal_transduction	141	1.42	1.01	0.590717	1	RACGAP1;ARHGAP11A
GO:0051091_positive_regulation_of_DNA-binding_transcription_factor_activity	111	1.8	1.29	0.462893	1	DDIT3;WNT3A
GO:0051209_release_of_sequestered_calcium_ion_into_cytosol	46	2.17	1.56	0.47825	1	DDIT3
GO:0051279_regulation_of_release_of_sequestered_calcium_ion_into_cytosol	12	0	0	1	1
GO:0051281_positive_regulation_of_release_of_sequestered_calcium_ion_into_cytosol	29	3.45	2.51	0.336356	1	CXCL10
GO:0051402_neuron_apoptotic_process	38	2.63	1.9	0.415702	1	NGFR
GO:0051480_regulation_of_cytosolic_calcium_ion_concentration	38	2.63	1.9	0.415702	1	CALCA
GO:0051481_negative_regulation_of_cytosolic_calcium_ion_concentration	12	0	0	1	1
GO:0051493_regulation_of_cytoskeleton_organization	26	0	0	1	1
GO:0051561_positive_regulation_of_mitochondrial_calcium_ion_concentration	11	0	0	1	1
GO:0051592_response_to_calcium_ion	57	1.75	1.26	0.553495	1	ADAM9
GO:0051693_actin_filament_capping	13	0	0	1	1
GO:0051881_regulation_of_mitochondrial_membrane_potential	28	0	0	1	1
GO:0051896_regulation_of_protein_kinase_B_signaling	11	0	0	1	1
GO:0051898_negative_regulation_of_protein_kinase_B_signaling	62	1.61	1.15	0.584019	1	DDIT3
GO:0051899_membrane_depolarization	22	0	0	1	1
GO:0051924_regulation_of_calcium_ion_transport	28	0	0	1	1
GO:0051928_positive_regulation_of_calcium_ion_transport	29	0	0	1	1
GO:0051932_synaptic_transmission,_GABAergic	13	0	0	1	1
GO:0051965_positive_regulation_of_synapse_assembly	63	0	0	1	1
GO:0051966_regulation_of_synaptic_transmission,_glutamatergic	29	0	0	1	1
GO:0051968_positive_regulation_of_synaptic_transmission,_glutamatergic	29	3.45	2.51	0.336356	1	CCL2
GO:0055074_calcium_ion_homeostasis	22	0	0	1	1
GO:0055085_transmembrane_transport	272	0.37	0.26	0.979001	1	ERLIN1
GO:0060071_Wnt_signaling_pathway,_planar_cell_polarity_pathway	89	1.12	0.8	0.716268	1	GPC4
GO:0060074_synapse_maturation	12	0	0	1	1
GO:0060078_regulation_of_postsynaptic_membrane_potential	32	0	0	1	1
GO:0060079_excitatory_postsynaptic_potential	63	0	0	1	1
GO:0060122_inner_ear_receptor_cell_stereocilium_organization	17	0	0	1	1
GO:0060307_regulation_of_ventricular_cardiac_muscle_cell_membrane_repolarization	23	0	0	1	1
GO:0060314_regulation_of_ryanodine-sensitive_calcium-release_channel_activity	16	0	0	1	1
GO:0060315_negative_regulation_of_ryanodine-sensitive_calcium-release_channel_activity	11	0	0	1	1
GO:0060337_type_I_interferon_signaling_pathway	67	0	0	1	1
GO:0060339_negative_regulation_of_type_I_interferon-mediated_signaling_pathway	14	0	0	1	1
GO:0060340_positive_regulation_of_type_I_interferon-mediated_signaling_pathway	13	0	0	1	1
GO:0060391_positive_regulation_of_SMAD_protein_signal_transduction	12	0	0	1	1
GO:0060396_growth_hormone_receptor_signaling_pathway	12	0	0	1	1
GO:0060402_calcium_ion_transport_into_cytosol	12	0	0	1	1
GO:0060765_regulation_of_androgen_receptor_signaling_pathway	11	0	0	1	1
GO:0060766_negative_regulation_of_androgen_receptor_signaling_pathway	15	0	0	1	1
GO:0060828_regulation_of_canonical_Wnt_signaling_pathway	26	0	0	1	1
GO:0061025_membrane_fusion	31	0	0	1	1
GO:0061314_Notch_signaling_involved_in_heart_development	11	0	0	1	1
GO:0061418_regulation_of_transcription_from_RNA_polymerase_II_promoter_in_response_to_hypoxia	71	0	0	1	1
GO:0061564_axon_development	13	0	0	1	1
GO:0061640_cytoskeleton-dependent_cytokinesis	22	0	0	1	1
GO:0070050_neuron_cellular_homeostasis	15	0	0	1	1
GO:0070102_interleukin-6-mediated_signaling_pathway	16	0	0	1	1
GO:0070104_negative_regulation_of_interleukin-6-mediated_signaling_pathway	11	0	0	1	1
GO:0070106_interleukin-27-mediated_signaling_pathway	11	0	0	1	1
GO:0070372_regulation_of_ERK1_and_ERK2_cascade	27	0	0	1	1
GO:0070507_regulation_of_microtubule_cytoskeleton_organization	31	3.23	2.35	0.354869	1	WNT3A
GO:0070509_calcium_ion_import	23	0	0	1	1
GO:0070528_protein_kinase_C_signaling	13	0	0	1	1
GO:0070555_response_to_interleukin-1	37	2.7	1.95	0.407375	1	SELE
GO:0070588_calcium_ion_transmembrane_transport	116	0	0	1	1
GO:0070593_dendrite_self-avoidance	16	0	0	1	1
GO:0070757_interleukin-35-mediated_signaling_pathway	11	0	0	1	1
GO:0070885_negative_regulation_of_calcineurin-NFAT_signaling_cascade	14	0	0	1	1
GO:0070886_positive_regulation_of_calcineurin-NFAT_signaling_cascade	16	0	0	1	1
GO:0071320_cellular_response_to_cAMP	52	0	0	1	1
GO:0071345_cellular_response_to_cytokine_stimulus	55	0	0	1	1
GO:0071346_cellular_response_to_interferon-gamma	94	1.06	0.75	0.735687	1	CCL2
GO:0071526_semaphorin-plexin_signaling_pathway	34	0	0	1	1
GO:0071542_dopaminergic_neuron_differentiation	21	0	0	1	1
GO:0071679_commissural_neuron_axon_guidance	12	0	0	1	1
GO:0071711_basement_membrane_organization	11	0	0	1	1
GO:0071805_potassium_ion_transmembrane_transport	116	0.86	0.61	0.806548	1	SLC9A2
GO:0071880_adenylate_cyclase-activating_adrenergic_receptor_signaling_pathway	19	0	0	1	1
GO:0072657_protein_localization_to_membrane	19	0	0	1	1
GO:0072659_protein_localization_to_plasma_membrane	138	0.72	0.51	0.858448	1	EMP2
GO:0075733_intracellular_transport_of_virus	50	0	0	1	1
GO:0086002_cardiac_muscle_cell_action_potential_involved_in_contraction	16	0	0	1	1
GO:0086005_ventricular_cardiac_muscle_cell_action_potential	18	0	0	1	1
GO:0086010_membrane_depolarization_during_action_potential	16	0	0	1	1
GO:0086012_membrane_depolarization_during_cardiac_muscle_cell_action_potential	12	0	0	1	1
GO:0090090_negative_regulation_of_canonical_Wnt_signaling_pathway	175	0.57	0.4	0.916341	1	DDIT3
GO:0090197_positive_regulation_of_chemokine_secretion	12	0	0	1	1
GO:0090314_positive_regulation_of_protein_targeting_to_membrane	30	0	0	1	1
GO:0097120_receptor_localization_to_synapse	11	0	0	1	1
GO:0097190_apoptotic_signaling_pathway	59	0	0	1	1
GO:0097191_extrinsic_apoptotic_signaling_pathway	44	2.27	1.64	0.463269	1	CD70
GO:0097320_plasma_membrane_tubulation	16	0	0	1	1
GO:0097623_potassium_ion_export_across_plasma_membrane	15	0	0	1	1
GO:0098655_cation_transmembrane_transport	19	0	0	1	1
GO:0098656_anion_transmembrane_transport	37	2.7	1.95	0.407375	1	SLC9A2
GO:0098664_G_protein-coupled_serotonin_receptor_signaling_pathway	27	0	0	1	1
GO:0098742_cell-cell_adhesion_via_plasma-membrane_adhesion_molecules	13	0	0	1	1
GO:0098911_regulation_of_ventricular_cardiac_muscle_cell_action_potential	11	0	0	1	1
GO:0098915_membrane_repolarization_during_ventricular_cardiac_muscle_cell_action_potential	12	0	0	1	1
GO:0098962_regulation_of_postsynaptic_neurotransmitter_receptor_activity	12	0	0	1	1
GO:0098974_postsynaptic_actin_cytoskeleton_organization	11	0	0	1	1
GO:0099072_regulation_of_postsynaptic_membrane_neurotransmitter_receptor_levels	11	0	0	1	1
GO:0099149_regulation_of_postsynaptic_neurotransmitter_receptor_internalization	11	0	0	1	1
GO:0099151_regulation_of_postsynaptic_density_assembly	11	0	0	1	1
GO:0099509_regulation_of_presynaptic_cytosolic_calcium_ion_concentration	13	0	0	1	1
GO:0099566_regulation_of_postsynaptic_cytosolic_calcium_ion_concentration	11	0	0	1	1
GO:0150078_positive_regulation_of_neuroinflammatory_response	11	0	0	1	1
GO:1900017_positive_regulation_of_cytokine_production_involved_in_inflammatory_response	20	0	0	1	1
GO:1900165_negative_regulation_of_interleukin-6_secretion	12	0	0	1	1
GO:1900271_regulation_of_long-term_synaptic_potentiation	14	0	0	1	1
GO:1900272_negative_regulation_of_long-term_synaptic_potentiation	13	0	0	1	1
GO:1900747_negative_regulation_of_vascular_endothelial_growth_factor_signaling_pathway	14	0	0	1	1
GO:1901214_regulation_of_neuron_death	17	0	0	1	1
GO:1901215_negative_regulation_of_neuron_death	53	1.89	1.35	0.527475	1	WNT3A
GO:1901216_positive_regulation_of_neuron_death	37	2.7	1.95	0.407375	1	FOS
GO:1901223_negative_regulation_of_NIK/NF-kappaB_signaling	33	3.03	2.2	0.372867	1	NOV
GO:1901379_regulation_of_potassium_ion_transmembrane_transport	16	0	0	1	1
GO:1901381_positive_regulation_of_potassium_ion_transmembrane_transport	12	0	0	1	1
GO:1901998_toxin_transport	37	2.7	1.95	0.407375	1	DNAJA1
GO:1902166_negative_regulation_of_intrinsic_apoptotic_signaling_pathway_in_response_to_DNA_damage_by_p53_class_mediator	16	0	0	1	1
GO:1902287_semaphorin-plexin_signaling_pathway_involved_in_axon_guidance	12	0	0	1	1
GO:1902358_sulfate_transmembrane_transport	16	0	0	1	1
GO:1902475_L-alpha-amino_acid_transmembrane_transport	11	0	0	1	1
GO:1902476_chloride_transmembrane_transport	88	1.14	0.81	0.712217	1	CLCN2
GO:1902894_negative_regulation_of_pri-miRNA_transcription_by_RNA_polymerase_II	13	0	0	1	1
GO:1903076_regulation_of_protein_localization_to_plasma_membrane	16	0	0	1	1
GO:1903077_negative_regulation_of_protein_localization_to_plasma_membrane	18	0	0	1	1
GO:1903204_negative_regulation_of_oxidative_stress-induced_neuron_death	13	0	0	1	1
GO:1903507_negative_regulation_of_nucleic_acid-templated_transcription	53	0	0	1	1
GO:1903830_magnesium_ion_transmembrane_transport	15	0	0	1	1
GO:1903861_positive_regulation_of_dendrite_extension	22	0	0	1	1
GO:1903980_positive_regulation_of_microglial_cell_activation	11	0	0	1	1
GO:1904263_positive_regulation_of_TORC1_signaling	14	0	0	1	1
GO:1904659_glucose_transmembrane_transport	24	0	0	1	1
GO:1990090_cellular_response_to_nerve_growth_factor_stimulus	35	2.86	2.07	0.390364	1	E2F1
GO:1990126_retrograde_transport,_endosome_to_plasma_membrane	18	0	0	1	1
GO:1990138_neuron_projection_extension	19	0	0	1	1
GO:1990573_potassium_ion_import_across_plasma_membrane	43	0	0	1	1
GO:1990869_cellular_response_to_chemokine	16	0	0	1	1
GO:2000249_regulation_of_actin_cytoskeleton_reorganization	19	0	0	1	1
GO:2000272_negative_regulation_of_signaling_receptor_activity	35	2.86	2.07	0.390364	1	LYPD6
GO:2000300_regulation_of_synaptic_vesicle_exocytosis	50	0	0	1	1
GO:2000310_regulation_of_NMDA_receptor_activity	30	0	0	1	1
GO:2000311_regulation_of_AMPA_receptor_activity	21	0	0	1	1
GO:2000463_positive_regulation_of_excitatory_postsynaptic_potential	26	0	0	1	1
GO:2000678_negative_regulation_of_transcription_regulatory_region_DNA_binding	13	0	0	1	1
GO:2000679_positive_regulation_of_transcription_regulatory_region_DNA_binding	16	0	0	1	1
GO:2000778_positive_regulation_of_interleukin-6_secretion	32	3.12	2.27	0.363931	1	F2RL1
GO:2001222_regulation_of_neuron_migration	14	0	0	1	1
GO:2001223_negative_regulation_of_neuron_migration	12	0	0	1	1
GO:2001224_positive_regulation_of_neuron_migration	15	0	0	1	1
GO:2001234_negative_regulation_of_apoptotic_signaling_pathway	27	0	0	1	1
GO:2001235_positive_regulation_of_apoptotic_signaling_pathway	25	0	0	1	1
GO:2001237_negative_regulation_of_extrinsic_apoptotic_signaling_pathway	34	0	0	1	1
GO:2001238_positive_regulation_of_extrinsic_apoptotic_signaling_pathway	25	0	0	1	1
GO:2001241_positive_regulation_of_extrinsic_apoptotic_signaling_pathway_in_absence_of_ligand	11	0	0	1	1
GO:2001243_negative_regulation_of_intrinsic_apoptotic_signaling_pathway	24	0	0	1	1
GO:2001256_regulation_of_store-operated_calcium_entry	14	0	0	1	1

## Sheet: KEGG_ Common between Tha and Th
ORA_Tha-T4M_common-kegg_all
geneset	NGenes	pctDE	OR	pvalue	FDR	external_gene_name.DE
hsa04115_p53_signaling_pathway	73	23.29	22.28	1.91004e-16	1.37523e-14	CDKN1A;MDM2;TNFRSF10B;SESN2;CCNB1;CDK1;CDK2;CHEK1;GTSE1;CCNB2;CASP9;GADD45A;GADD45B;CCNE2;CHEK2;PMAIP1;CCNE1
hsa04064_NF-kappa_B_signaling_pathway	104	13.46	11.31	2.28718e-10	8.23383e-09	EDA2R;VCAM1;NFKB1;NFKBIA;GADD45A;NFKB2;GADD45B;RELB;TNFAIP3;ICAM1;CXCL3;CXCL2;BIRC3;CXCL8
hsa04657_IL-17_signaling_pathway	94	12.77	10.58	8.30885e-09	1.99412e-07	HSP90AA1;HSP90AB1;CCL2;FOS;NFKB1;NFKBIA;TNFAIP3;FOSB;CXCL3;CXCL10;CXCL2;CXCL8
hsa04668_TNF_signaling_pathway	112	10.71	8.67	6.12897e-08	1.10322e-06	CCL2;VCAM1;FOS;NFKB1;NFKBIA;TNFAIP3;ICAM1;CXCL3;CXCL10;CXCL2;BIRC3;SELE
hsa04010_MAPK_signaling_pathway	294	6.12	4.76	2.17422e-07	3.13088e-06	HSPA8;NGFR;DUSP3;HSPB1;FOS;HSPA1A;NFKB1;GADD45A;EGF;DDIT3;NFKB2;HSPA1B;GADD45B;PLA2G4C;RELB;NFATC1;TGFA;TEK
hsa04068_FoxO_signaling_pathway	131	9.16	7.29	3.46796e-07	4.16155e-06	CDKN1A;MDM2;PLK2;CCNB1;PLK1;PLK3;CDK2;CCNB2;GADD45A;EGF;PLK4;GADD45B
hsa04151_PI3K-Akt_signaling_pathway	354	4.8	3.67	1.24376e-05	0.000127929	HSP90AA1;HSP90AB1;CDKN1A;MDM2;NGFR;SPP1;CDK2;BRCA1;NFKB1;CASP9;EGF;CCNE2;CCNE1;PKN3;TGFA;TEK;JAK3
hsa04621_NOD-like_receptor_signaling_pathway	180	6.11	4.68	5.11425e-05	0.000460282	HSP90AA1;HSP90AB1;NAMPT;CCL2;NFKB1;NFKBIA;TNFAIP3;CXCL3;CXCL2;BIRC3;CXCL8
hsa04933_AGE-RAGE_signaling_pathway_in_diabetic_complications	100	8	6.22	8.44304e-05	0.000675443	CCL2;VCAM1;NFKB1;PLCD4;ICAM1;NFATC1;CXCL8;SELE
hsa04625_C-type_lectin_receptor_signaling_pathway	104	7.69	5.96	0.000111332	0.000801588	MDM2;PLK3;NFKB1;NFKBIA;NFKB2;RELB;NFATC2;NFATC1
hsa05120_Epithelial_cell_signaling_in_Helicobacter_pylori_infection	70	8.57	6.68	0.000451355	0.00295432	NFKB1;NFKBIA;CXCL3;CXCL2;CXCL8;ATP6V0D2
hsa05170_Human_immunodeficiency_virus_1_infection	212	4.72	3.55	0.00087561	0.00525366	CCNB1;CDK1;FOS;CHEK1;CCNB2;NFKB1;NFKBIA;CASP9;NFATC2;NFATC1
hsa04060_Cytokine-cytokine_receptor_interaction	294	4.08	3.06	0.000991555	0.00549169	TNFRSF10B;NGFR;CCL2;EDA2R;GDF15;CXCL3;IL32;CXCL10;CXCL2;CXCL8;CD70;TNFRSF9
hsa04061_Viral_protein_interaction_with_cytokine_and_cytokine_receptor	100	6	4.54	0.00289046	0.0148652	TNFRSF10B;CCL2;CXCL3;CXCL10;CXCL2;CXCL8
hsa04915_Estrogen_signaling_pathway	137	5.11	3.84	0.00328147	0.0157511	HSPA8;HSP90AA1;HSP90AB1;FOS;HSPA1A;HSPA1B;TGFA
hsa04620_Toll-like_receptor_signaling_pathway	104	5.77	4.36	0.00351213	0.0158046	SPP1;FOS;NFKB1;NFKBIA;CXCL10;CXCL8
hsa04062_Chemokine_signaling_pathway	192	4.17	3.1	0.00592387	0.0236955	CCL2;NFKB1;NFKBIA;JAK3;CXCL3;CXCL10;CXCL2;CXCL8
hsa04662_B_cell_receptor_signaling_pathway	81	6.17	4.67	0.00567875	0.0236955	FOS;NFKB1;NFKBIA;NFATC2;NFATC1
hsa04370_VEGF_signaling_pathway	59	6.78	5.15	0.00946689	0.0358745	HSPB1;CASP9;PLA2G4C;NFATC2
hsa04660_T_cell_receptor_signaling_pathway	104	4.81	3.58	0.0157314	0.055142	FOS;NFKB1;NFKBIA;NFATC2;NFATC1
hsa05340_Primary_immunodeficiency	38	7.89	6.06	0.0160831	0.055142	RFX5;UNG;JAK3
hsa04622_RIG-I-like_receptor_signaling_pathway	70	5.71	4.29	0.0169262	0.0553949	NFKB1;NFKBIA;CXCL10;CXCL8
hsa04066_HIF-1_signaling_pathway	109	3.67	2.69	0.0676565	0.20297	CDKN1A;NFKB1;EGF;TEK
hsa04921_Oxytocin_signaling_pathway	154	3.25	2.38	0.0664135	0.20297	CDKN1A;FOS;PLA2G4C;NFATC2;NFATC1
hsa04920_Adipocytokine_signaling_pathway	69	4.35	3.21	0.0729973	0.210232	NFKB1;NFKBIA;ACSBG1
hsa04721_Synaptic_vesicle_cycle	78	3.85	2.83	0.0969097	0.268365	STX3;SLC6A12;ATP6V0D2
hsa04014_Ras_signaling_pathway	232	2.59	1.88	0.109458	0.281464	NGFR;NFKB1;EGF;PLA2G4C;TGFA;TEK
hsa04926_Relaxin_signaling_pathway	129	3.1	2.26	0.108494	0.281464	ACTA2;FOS;NFKB1;NFKBIA
hsa04012_ErbB_signaling_pathway	85	3.53	2.58	0.117406	0.291491	CDKN1A;EGF;TGFA
hsa04672_Intestinal_immune_network_for_IgA_production	47	4.26	3.13	0.14091	0.338184	FP565260.3;ICOSLG
hsa04350_TGF-beta_signaling_pathway	94	3.19	2.33	0.145861	0.338774	TFDP1;THSD4;FST
hsa04310_Wnt_signaling_pathway	160	2.5	1.81	0.188037	0.423083	GPC4;NFATC2;NFATC1;WNT3A
hsa04722_Neurotrophin_signaling_pathway	119	2.52	1.82	0.233988	0.510519	NGFR;NFKB1;NFKBIA
hsa04919_Thyroid_hormone_signaling_pathway	121	2.48	1.79	0.241436	0.511275	MDM2;CASP9;PLCD4
hsa04917_Prolactin_signaling_pathway	70	2.86	2.07	0.257625	0.529971	FOS;NFKB1
hsa03320_PPAR_signaling_pathway	77	2.6	1.88	0.294034	0.588067	SCD;ACSBG1
hsa04024_cAMP_signaling_pathway	216	1.85	1.33	0.359725	0.649035	FOS;NFKB1;NFKBIA;NFATC1
hsa04072_Phospholipase_D_signaling_pathway	148	2.03	1.46	0.34425	0.649035	EGF;PLA2G4C;CXCL8
hsa04130_SNARE_interactions_in_vesicular_transport	33	3.03	2.2	0.372867	0.649035	STX3
hsa04150_mTOR_signaling_pathway	155	1.94	1.39	0.370995	0.649035	SESN2;WDR59;WNT3A
hsa04390_Hippo_signaling_pathway	157	1.91	1.37	0.378604	0.649035	BIRC5;BIRC3;WNT3A
hsa04727_GABAergic_synapse	89	2.25	1.62	0.355701	0.649035	HAP1;SLC6A12
hsa04630_JAK-STAT_signaling_pathway	162	1.85	1.33	0.397534	0.665639	CDKN1A;EGF;JAK3
hsa02010_ABC_transporters	45	2.22	1.6	0.470812	0.77042	ABCA13
hsa04071_Sphingolipid_signaling_pathway	119	1.68	1.2	0.499249	0.788371	S1PR3;NFKB1
hsa04152_AMPK_signaling_pathway	120	1.67	1.19	0.503681	0.788371	SCD;CCNA2
hsa04020_Calcium_signaling_pathway	201	1.49	1.07	0.537474	0.806211	PDE1C;EGF;PLCD4
hsa04330_Notch_signaling_pathway	53	1.89	1.35	0.527475	0.806211	DTX4
hsa04015_Rap1_signaling_pathway	210	1.43	1.02	0.567108	0.818683	NGFR;EGF;TEK
hsa04371_Apelin_signaling_pathway	137	1.46	1.04	0.575048	0.818683	ACTA2;SPP1
hsa04810_Regulation_of_actin_cytoskeleton	214	1.4	1	0.5799	0.818683	IQGAP3;EGF;DIAPH3
hsa04664_Fc_epsilon_RI_signaling_pathway	68	1.47	1.05	0.617913	0.855571	PLA2G4C
hsa03013_RNA_transport	184	1.09	0.77	0.732316	0.909082	FUS;TACC3
hsa04022_cGMP-PKG_signaling_pathway	167	1.2	0.85	0.682071	0.909082	NFATC2;NFATC1
hsa04080_Neuroactive_ligand-receptor_interaction	341	1.17	0.83	0.707107	0.909082	S1PR3;F2RL1;C5AR1;CALCA
hsa04512_ECM-receptor_interaction	88	1.14	0.81	0.712217	0.909082	SPP1
hsa04610_Complement_and_coagulation_cascades	85	1.18	0.84	0.699713	0.909082	C5AR1
hsa04912_GnRH_signaling_pathway	93	1.08	0.76	0.731912	0.909082	PLA2G4C
hsa04070_Phosphatidylinositol_signaling_system	97	1.03	0.73	0.746696	0.911222	PLCD4
hsa04724_Glutamatergic_synapse	114	0.88	0.62	0.800978	0.930168	PLA2G4C
hsa04725_Cholinergic_synapse	113	0.88	0.63	0.798134	0.930168	FOS
hsa04726_Serotonergic_synapse	113	0.88	0.63	0.798134	0.930168	PLA2G4C
hsa04728_Dopaminergic_synapse	132	0.76	0.54	0.845857	0.966693	FOS
hsa03022_Basal_transcription_factors	45	0	0	1	1
hsa04261_Adrenergic_signaling_in_cardiomyocytes	150	0	0	1	1
hsa04340_Hedgehog_signaling_pathway	50	0	0	1	1
hsa04392_Hippo_signaling_pathway	29	0	0	1	1
hsa04723_Retrograde_endocannabinoid_signaling	148	0	0	1	1
hsa04910_Insulin_signaling_pathway	137	0	0	1	1
hsa04922_Glucagon_signaling_pathway	107	0	0	1	1
hsa04961_Endocrine_and_other_factor-regulated_calcium_reabsorption	53	0	0	1	1
hsa05320_Autoimmune_thyroid_disease	51	0	0	1	1

## Sheet: Unique in Tha - ORA_Tha_uniqueF
ORA_Tha_uniqueFromT4M-go_all
geneset	NGenes	pctDE	OR	pvalue	FDR	external_gene_name.DE
GO:0006898_receptor-mediated_endocytosis	95	6.32	9.51	6.78472e-05	0.0512925	HPX;TGFBR2;ALB;AMBP;APOB;APOA1
GO:0043691_reverse_cholesterol_transport	16	18.75	32.1	0.000195179	0.0737776	ABCG1;APOA2;APOA1
GO:0030301_cholesterol_transport	19	15.79	26.06	0.000332366	0.0774644	APOA2;APOB;APOA1
GO:0061024_membrane_organization	132	4.55	6.7	0.000409864	0.0774644	DHCR24;TBC1D1;HBEGF;SYNJ2;TF;APOB
GO:0000281_mitotic_cytokinesis	52	5.77	8.51	0.00636337	0.299964	INCENP;CIT;ECT2
GO:0002224_toll-like_receptor_signaling_pathway	43	6.98	10.43	0.00372636	0.299964	APOB;FGB;FGA
GO:0007179_transforming_growth_factor_beta_receptor_signaling_pathway	103	3.88	5.64	0.00674522	0.299964	MTMR4;ITGB5;SMAD7;TGFBR2
GO:0032467_positive_regulation_of_cytokinesis	39	7.69	11.59	0.00281856	0.299964	CIT;ECT2;KIF14
GO:0035023_regulation_of_Rho_protein_signal_transduction	84	4.76	6.98	0.00327274	0.299964	ECT2;ARHGEF26;DNMBP;KANK2
GO:0043401_steroid_hormone_mediated_signaling_pathway	52	5.77	8.51	0.00636337	0.299964	LEF1;NR1H4;HNF4A
GO:0043523_regulation_of_neuron_apoptotic_process	17	11.76	18.45	0.00660197	0.299964	MEF2C;KIF14
GO:0045010_actin_nucleation	11	18.18	30.76	0.00274721	0.299964	LMOD1;VIL1
GO:0045666_positive_regulation_of_neuron_differentiation	84	4.76	6.98	0.00327274	0.299964	TIMP2;ECT2;ASCL1;MEF2C
GO:0045892_negative_regulation_of_transcription,_DNA-templated	528	1.89	2.74	0.00532312	0.299964	QARS;SALL1;SFRP1;ASCL1;ARNTL;NPAS1;LEF1;CEBPA;HR;HNF4A
GO:0070374_positive_regulation_of_ERK1_and_ERK2_cascade	212	2.83	4.09	0.00457524	0.299964	HMGCR;DSTYK;FGFR4;CCR7;FGB;FGA
GO:0070593_dendrite_self-avoidance	16	12.5	19.77	0.005853	0.299964	PALLD;NEXN
GO:1903078_positive_regulation_of_protein_localization_to_plasma_membrane	52	5.77	8.51	0.00636337	0.299964	EZR;LGALS3;VIL1
GO:0007156_homophilic_cell_adhesion_via_plasma_membrane_adhesion_molecules	167	2.99	4.32	0.00749087	0.314616	CDH2;PALLD;CDH20;NEXN;DSC2
GO:0007219_Notch_signaling_pathway	111	3.6	5.21	0.00873959	0.343715	ASCL1;TGFBR2;CEBPA;NR1H4
GO:0050860_negative_regulation_of_T_cell_receptor_signaling_pathway	20	10	15.38	0.009093	0.343715	EZR;LGALS3
GO:0034220_ion_transmembrane_transport	254	2.36	3.39	0.0106993	0.376314	ATP1B2;TPCN2;ABCG1;ABCG4;GABRP;ANO9
GO:0048260_positive_regulation_of_receptor-mediated_endocytosis	22	9.09	13.84	0.0109509	0.376314	TF;C3
GO:0010804_negative_regulation_of_tumor_necrosis_factor-mediated_signaling_pathway	24	8.33	12.58	0.012961	0.426022	APOA1;NR1H4
GO:0030512_negative_regulation_of_transforming_growth_factor_beta_receptor_signaling_pathway	77	3.9	5.63	0.0184726	0.54144	MTMR4;SMAD7;TGFBR2
GO:0051966_regulation_of_synaptic_transmission,_glutamatergic	29	6.9	10.25	0.018621	0.54144	CDH2;MEF2C
GO:0072659_protein_localization_to_plasma_membrane	138	2.9	4.16	0.0181763	0.54144	CDH2;EZR;SYTL2;MAP7
GO:0019722_calcium-mediated_signaling	80	3.75	5.41	0.0204255	0.569718	EIF2AK3;TPCN2;CCR7
GO:0071347_cellular_response_to_interleukin-1	81	3.7	5.34	0.0211007	0.569718	SFRP1;ADAMTS12;FGB
GO:0007165_signal_transduction	970	1.34	1.92	0.0247297	0.603087	TXNRD1;RSU1;ANXA1;HBEGF;NRGN;TNFRSF11B;CXCL14;CD34;CD274;CALCB;C3;TTR;GABRP
GO:0045087_innate_immune_response	392	1.79	2.55	0.0245291	0.603087	ANXA1;PTX3;IL1RAP;LGALS3;FGB;FGA;NR1H4
GO:0050767_regulation_of_neurogenesis	33	6.06	8.93	0.0237646	0.603087	ASCL1;ARNTL
GO:0030177_positive_regulation_of_Wnt_signaling_pathway	36	5.56	8.14	0.0279585	0.640504	SALL1;SFRP1
GO:1902042_negative_regulation_of_extrinsic_apoptotic_signaling_pathway_via_death_domain_receptors	36	5.56	8.14	0.0279585	0.640504	FGB;FGA
GO:1901998_toxin_transport	37	5.41	7.91	0.0294177	0.654112	ABCG1;CD274
GO:0000122_negative_regulation_of_transcription_by_RNA_polymerase_II	811	1.36	1.94	0.0346121	0.723434	EZR;SALL1;ASCL1;SMAD7;RBL1;KANK2;MEF2C;NPAS1;LEF1;CEBPA;NR1H4
GO:0002250_adaptive_immune_response	170	2.35	3.35	0.0354062	0.723434	ANXA1;CD274;FGB;FGA
GO:0031623_receptor_internalization	40	5	7.28	0.0339721	0.723434	RAB31;EZR
GO:0003407_neural_retina_development	15	6.67	9.84	0.103286	0.848738	SLC17A8
GO:0006955_immune_response	306	1.63	2.31	0.0723301	0.848738	IL1RAP;CXCL14;CD274;CCR7;C3
GO:0006977_DNA_damage_response,_signal_transduction_by_p53_class_mediator_resulting_in_cell_cycle_arrest	56	3.57	5.12	0.0622536	0.848738	AURKA;CDC25C
GO:0007173_epidermal_growth_factor_receptor_signaling_pathway	48	4.17	6.01	0.0473266	0.848738	HBEGF;VIL1
GO:0007224_smoothened_signaling_pathway	64	3.12	4.46	0.078535	0.848738	NSDHL;TGFBR2
GO:0008645_hexose_transmembrane_transport	13	7.69	11.48	0.0901528	0.848738	SLC2A12
GO:0010001_glial_cell_differentiation	14	7.14	10.59	0.0967429	0.848738	CDH2
GO:0010248_establishment_or_maintenance_of_transmembrane_electrochemical_gradient	14	7.14	10.59	0.0967429	0.848738	ATP1B2
GO:0010737_protein_kinase_A_signaling	13	7.69	11.48	0.0901528	0.848738	EZR
GO:0015813_L-glutamate_transmembrane_transport	15	6.67	9.84	0.103286	0.848738	SLC17A8
GO:0015909_long-chain_fatty_acid_transport	14	7.14	10.59	0.0967429	0.848738	FABP1
GO:0016322_neuron_remodeling	12	8.33	12.52	0.0835148	0.848738	C3
GO:0016339_calcium-dependent_cell-cell_adhesion_via_plasma_membrane_cell_adhesion_molecules	46	4.35	6.29	0.0438315	0.848738	CDH2;CDH20
GO:0021527_spinal_cord_association_neuron_differentiation	13	7.69	11.48	0.0901528	0.848738	ASCL1
GO:0021954_central_nervous_system_neuron_development	13	7.69	11.48	0.0901528	0.848738	ASCL1
GO:0030514_negative_regulation_of_BMP_signaling_pathway	50	4	5.76	0.0509198	0.848738	SFRP1;SMAD7
GO:0030838_positive_regulation_of_actin_filament_polymerization	53	3.77	5.42	0.056486	0.848738	LMOD1;CCR7
GO:0031532_actin_cytoskeleton_reorganization	56	3.57	5.12	0.0622536	0.848738	EZR;ANXA1
GO:0032233_positive_regulation_of_actin_filament_bundle_assembly	13	7.69	11.48	0.0901528	0.848738	VIL1
GO:0032367_intracellular_cholesterol_transport	11	9.09	13.78	0.0768286	0.848738	ABCG1
GO:0032482_Rab_protein_signal_transduction	70	2.86	4.06	0.0915145	0.848738	RAB31;RAB39A
GO:0032693_negative_regulation_of_interleukin-10_production	14	7.14	10.59	0.0967429	0.848738	CD274
GO:0032703_negative_regulation_of_interleukin-2_production	15	6.67	9.84	0.103286	0.848738	NR1H4
GO:0032743_positive_regulation_of_interleukin-2_production	14	7.14	10.59	0.0967429	0.848738	ANXA1
GO:0033147_negative_regulation_of_intracellular_estrogen_receptor_signaling_pathway	13	7.69	11.48	0.0901528	0.848738	KANK2
GO:0033209_tumor_necrosis_factor-mediated_signaling_pathway	116	2.59	3.68	0.0522876	0.848738	TNFRSF19;KRT8;TNFRSF11B
GO:0034097_response_to_cytokine	48	4.17	6.01	0.0473266	0.848738	TIMP2;CD274
GO:0034142_toll-like_receptor_4_signaling_pathway	15	6.67	9.84	0.103286	0.848738	NR1H4
GO:0035435_phosphate_ion_transmembrane_transport	14	7.14	10.59	0.0967429	0.848738	SLC20A2
GO:0036376_sodium_ion_export_across_plasma_membrane	13	7.69	11.48	0.0901528	0.848738	ATP1B2
GO:0042953_lipoprotein_transport	14	7.14	10.59	0.0967429	0.848738	APOB
GO:0043518_negative_regulation_of_DNA_damage_response,_signal_transduction_by_p53_class_mediator	15	6.67	9.84	0.103286	0.848738	PTTG1IP
GO:0045416_positive_regulation_of_interleukin-8_biosynthetic_process	12	8.33	12.52	0.0835148	0.848738	APOA2
GO:0045745_positive_regulation_of_G_protein-coupled_receptor_signaling_pathway	14	7.14	10.59	0.0967429	0.848738	C3
GO:0045943_positive_regulation_of_transcription_by_RNA_polymerase_I	12	8.33	12.52	0.0835148	0.848738	EIF2AK3
GO:0048009_insulin-like_growth_factor_receptor_signaling_pathway	13	7.69	11.48	0.0901528	0.848738	EIF2AK3
GO:0048666_neuron_development	53	3.77	5.42	0.056486	0.848738	ASCL1;MEF2C
GO:0050713_negative_regulation_of_interleukin-1_beta_secretion	13	7.69	11.48	0.0901528	0.848738	APOA1
GO:0050777_negative_regulation_of_immune_response	13	7.69	11.48	0.0901528	0.848738	AMBP
GO:0050862_positive_regulation_of_T_cell_receptor_signaling_pathway	14	7.14	10.59	0.0967429	0.848738	CCR7
GO:0051016_barbed-end_actin_filament_capping	15	6.67	9.84	0.103286	0.848738	VIL1
GO:0051209_release_of_sequestered_calcium_ion_into_cytosol	46	4.35	6.29	0.0438315	0.848738	TPCN2;CCR7
GO:0051592_response_to_calcium_ion	57	3.51	5.03	0.064219	0.848738	FGB;FGA
GO:0051693_actin_filament_capping	13	7.69	11.48	0.0901528	0.848738	VIL1
GO:0060070_canonical_Wnt_signaling_pathway	74	2.7	3.84	0.10049	0.848738	SFRP1;LEF1
GO:0060074_synapse_maturation	12	8.33	12.52	0.0835148	0.848738	SEZ6L
GO:0060395_SMAD_protein_signal_transduction	56	3.57	5.12	0.0622536	0.848738	AFP;HNF4A
GO:0060766_negative_regulation_of_androgen_receptor_signaling_pathway	15	6.67	9.84	0.103286	0.848738	SFRP1
GO:0070528_protein_kinase_C_signaling	13	7.69	11.48	0.0901528	0.848738	FIBIN
GO:0071345_cellular_response_to_cytokine_stimulus	55	3.64	5.22	0.0603094	0.848738	LEF1;CCR7
GO:0090179_planar_cell_polarity_pathway_involved_in_neural_tube_closure	12	8.33	12.52	0.0835148	0.848738	SFRP1
GO:0098911_regulation_of_ventricular_cardiac_muscle_cell_action_potential	11	9.09	13.78	0.0768286	0.848738	DSC2
GO:0099151_regulation_of_postsynaptic_density_assembly	11	9.09	13.78	0.0768286	0.848738	IL1RAP
GO:1902043_positive_regulation_of_extrinsic_apoptotic_signaling_pathway_via_death_domain_receptors	11	9.09	13.78	0.0768286	0.848738	SFRP1
GO:2001256_regulation_of_store-operated_calcium_entry	14	7.14	10.59	0.0967429	0.848738	SPINK1
GO:0007405_neuroblast_proliferation	16	6.25	9.18	0.109781	0.861088	ASCL1
GO:0032874_positive_regulation_of_stress-activated_MAPK_cascade	17	5.88	8.61	0.11623	0.861088	HMGCR
GO:0034162_toll-like_receptor_9_signaling_pathway	16	6.25	9.18	0.109781	0.861088	NR1H4
GO:0043923_positive_regulation_by_host_of_viral_transcription	17	5.88	8.61	0.11623	0.861088	LEF1
GO:0045893_positive_regulation_of_transcription,_DNA-templated	565	1.24	1.75	0.117317	0.861088	SALL1;SFRP1;PCBD1;ARNTL;MEF2C;LEF1;HNF4A
GO:0046330_positive_regulation_of_JNK_cascade	80	2.5	3.54	0.114383	0.861088	TNFRSF19;CCR7
GO:0048665_neuron_fate_specification	16	6.25	9.18	0.109781	0.861088	ASCL1
GO:0070102_interleukin-6-mediated_signaling_pathway	16	6.25	9.18	0.109781	0.861088	CEBPA
GO:0090280_positive_regulation_of_calcium_ion_import	17	5.88	8.61	0.11623	0.861088	LGALS3
GO:1901214_regulation_of_neuron_death	17	5.88	8.61	0.11623	0.861088	DHCR24
GO:1902041_regulation_of_extrinsic_apoptotic_signaling_pathway_via_death_domain_receptors	17	5.88	8.61	0.11623	0.861088	LGALS3
GO:0006366_transcription_by_RNA_polymerase_II	267	1.5	2.11	0.129372	0.870095	PTTG1;HIF3A;LEF1;CEBPA
GO:0007229_integrin-mediated_signaling_pathway	91	2.2	3.1	0.140991	0.870095	ITGB5;APOA1
GO:0016338_calcium-independent_cell-cell_adhesion_via_plasma_membrane_cell-adhesion_molecules	21	4.76	6.88	0.141563	0.870095	CLDN1
GO:0017015_regulation_of_transforming_growth_factor_beta_receptor_signaling_pathway	20	5	7.25	0.135298	0.870095	SMAD7
GO:0023019_signal_transduction_involved_in_regulation_of_gene_expression	20	5	7.25	0.135298	0.870095	HNF4A
GO:0030509_BMP_signaling_pathway	86	2.33	3.29	0.128732	0.870095	SMAD7;LEF1
GO:0032006_regulation_of_TOR_signaling	18	5.56	8.1	0.122632	0.870095	FAM83D
GO:0035567_non-canonical_Wnt_signaling_pathway	20	5	7.25	0.135298	0.870095	SFRP1
GO:0043123_positive_regulation_of_I-kappaB_kinase/NF-kappaB_signaling	179	1.68	2.36	0.140802	0.870095	TNFRSF19;ECT2;CCR7
GO:0045944_positive_regulation_of_transcription_by_RNA_polymerase_II	1133	1.06	1.5	0.121584	0.870095	SALL1;ASCL1;SMAD7;ARNTL;RBL1;MEF2C;HIF3A;NPAS1;LEF1;CEBPA;NR1H4;HNF4A
GO:0046928_regulation_of_neurotransmitter_secretion	19	5.26	7.65	0.128988	0.870095	MEF2C
GO:0048663_neuron_fate_commitment	19	5.26	7.65	0.128988	0.870095	ASCL1
GO:0050770_regulation_of_axonogenesis	20	5	7.25	0.135298	0.870095	CDH2
GO:0051897_positive_regulation_of_protein_kinase_B_signaling	176	1.7	2.4	0.13583	0.870095	HBEGF;FGFR4;CCR7
GO:0071277_cellular_response_to_calcium_ion	83	2.41	3.41	0.121505	0.870095	ECT2;MEF2C
GO:0071542_dopaminergic_neuron_differentiation	21	4.76	6.88	0.141563	0.870095	SFRP1
GO:1900273_positive_regulation_of_long-term_synaptic_potentiation	21	4.76	6.88	0.141563	0.870095	NRGN
GO:1990138_neuron_projection_extension	19	5.26	7.65	0.128988	0.870095	AURKA
GO:2000179_positive_regulation_of_neural_precursor_cell_proliferation	21	4.76	6.88	0.141563	0.870095	ASCL1
GO:2000311_regulation_of_AMPA_receptor_activity	21	4.76	6.88	0.141563	0.870095	MEF2C
GO:0007015_actin_filament_organization	92	2.17	3.07	0.143472	0.874717	TPM4;TPM1
GO:0006874_cellular_calcium_ion_homeostasis	94	2.13	3	0.148462	0.88376	TPCN2;CALCB
GO:0046628_positive_regulation_of_insulin_receptor_signaling_pathway	22	4.55	6.56	0.147783	0.88376	NR1H4
GO:0090316_positive_regulation_of_intracellular_protein_transport	22	4.55	6.56	0.147783	0.88376	PRR5L
GO:0097711_ciliary_basal_body-plasma_membrane_docking	95	2.11	2.97	0.150971	0.89167	CEP152;HAUS8
GO:0000226_microtubule_cytoskeleton_organization	103	1.94	2.73	0.171321	0.892562	WEE1;MAP7
GO:0001764_neuron_migration	108	1.85	2.6	0.184259	0.892562	ASCL1;MEF2C
GO:0002227_innate_immune_response_in_mucosa	24	4.17	5.99	0.160088	0.892562	HIST1H2BE
GO:0006811_ion_transport	98	2.04	2.88	0.158545	0.892562	SLC20A2;SLC17A8
GO:0006886_intracellular_protein_transport	307	1.3	1.83	0.183638	0.892562	RAB31;TBC1D1;SYTL2;RAB39A
GO:0007186_G_protein-coupled_receptor_signaling_pathway	1091	1.01	1.42	0.169141	0.892562	ANXA1;RGS4;GPSM2;ECT2;ARHGEF26;ACKR1;CALCB;CCR7;ENTPD2;C3;APOA1
GO:0007411_axon_guidance	205	1.46	2.05	0.186203	0.892562	PALLD;EZR;NEXN
GO:0010975_regulation_of_neuron_projection_development	25	4	5.74	0.166174	0.892562	SFRP1
GO:0015721_bile_acid_and_bile_salt_transport	26	3.85	5.51	0.172216	0.892562	NR1H4
GO:0030111_regulation_of_Wnt_signaling_pathway	26	3.85	5.51	0.172216	0.892562	LEF1
GO:0030866_cortical_actin_cytoskeleton_organization	27	3.7	5.3	0.178215	0.892562	CIT
GO:0032689_negative_regulation_of_interferon-gamma_production	28	3.57	5.1	0.18417	0.892562	CD274
GO:0032733_positive_regulation_of_interleukin-10_production	25	4	5.74	0.166174	0.892562	CD34
GO:0032735_positive_regulation_of_interleukin-12_production	25	4	5.74	0.166174	0.892562	CCR7
GO:0035025_positive_regulation_of_Rho_protein_signal_transduction	29	3.45	4.92	0.190083	0.892562	APOA1
GO:0035249_synaptic_transmission,_glutamatergic	28	3.57	5.1	0.18417	0.892562	SLC17A8
GO:0042073_intraciliary_transport	26	3.85	5.51	0.172216	0.892562	MAK
GO:0043001_Golgi_to_plasma_membrane_protein_transport	29	3.45	4.92	0.190083	0.892562	RAB31
GO:0043410_positive_regulation_of_MAPK_cascade	103	1.94	2.73	0.171321	0.892562	CDH2;TIMP2
GO:0045880_positive_regulation_of_smoothened_signaling_pathway	29	3.45	4.92	0.190083	0.892562	SFRP1
GO:0046329_negative_regulation_of_JNK_cascade	29	3.45	4.92	0.190083	0.892562	AMBP
GO:0046580_negative_regulation_of_Ras_protein_signal_transduction	27	3.7	5.3	0.178215	0.892562	TIMP2
GO:0051281_positive_regulation_of_release_of_sequestered_calcium_ion_into_cytosol	29	3.45	4.92	0.190083	0.892562	CEMIP
GO:0051493_regulation_of_cytoskeleton_organization	26	3.85	5.51	0.172216	0.892562	NEXN
GO:0051924_regulation_of_calcium_ion_transport	28	3.57	5.1	0.18417	0.892562	RGS4
GO:0070372_regulation_of_ERK1_and_ERK2_cascade	27	3.7	5.3	0.178215	0.892562	FAM83D
GO:0071353_cellular_response_to_interleukin-4	25	4	5.74	0.166174	0.892562	LEF1
GO:0097150_neuronal_stem_cell_population_maintenance	23	4.35	6.26	0.153958	0.892562	CDH2
GO:0099560_synaptic_membrane_adhesion	23	4.35	6.26	0.153958	0.892562	IL1RAP
GO:1904659_glucose_transmembrane_transport	24	4.17	5.99	0.160088	0.892562	SLC2A12
GO:1905606_regulation_of_presynapse_assembly	27	3.7	5.3	0.178215	0.892562	IL1RAP
GO:2000463_positive_regulation_of_excitatory_postsynaptic_potential	26	3.85	5.51	0.172216	0.892562	RGS4
GO:2001234_negative_regulation_of_apoptotic_signaling_pathway	27	3.7	5.3	0.178215	0.892562	QARS
GO:0048008_platelet-derived_growth_factor_receptor_signaling_pathway	30	3.33	4.75	0.195953	0.903293	PLAT
GO:0090314_positive_regulation_of_protein_targeting_to_membrane	30	3.33	4.75	0.195953	0.903293	CEMIP
GO:2000310_regulation_of_NMDA_receptor_activity	30	3.33	4.75	0.195953	0.903293	MEF2C
GO:0006904_vesicle_docking_involved_in_exocytosis	31	3.23	4.59	0.20178	0.913447	SYTL2
GO:0030041_actin_filament_polymerization	31	3.23	4.59	0.20178	0.913447	VIL1
GO:0038128_ERBB2_signaling_pathway	31	3.23	4.59	0.20178	0.913447	HBEGF
GO:0006821_chloride_transport	32	3.12	4.44	0.207566	0.923056	ANO9
GO:0050772_positive_regulation_of_axonogenesis	32	3.12	4.44	0.207566	0.923056	CHODL
GO:2000778_positive_regulation_of_interleukin-6_secretion	32	3.12	4.44	0.207566	0.923056	IL1RAP
GO:0030522_intracellular_receptor_signaling_pathway	34	2.94	4.17	0.219012	0.957068	NR1H4
GO:0032715_negative_regulation_of_interleukin-6_production	34	2.94	4.17	0.219012	0.957068	NR1H4
GO:2001237_negative_regulation_of_extrinsic_apoptotic_signaling_pathway	34	2.94	4.17	0.219012	0.957068	LGALS3
GO:0032007_negative_regulation_of_TOR_signaling	35	2.86	4.05	0.224673	0.965072	ARNTL
GO:0042059_negative_regulation_of_epidermal_growth_factor_receptor_signaling_pathway	35	2.86	4.05	0.224673	0.965072	HBEGF
GO:0050853_B_cell_receptor_signaling_pathway	35	2.86	4.05	0.224673	0.965072	MEF2C
GO:0033572_transferrin_transport	36	2.78	3.93	0.230293	0.9781	TF
GO:0046627_negative_regulation_of_insulin_receptor_signaling_pathway	36	2.78	3.93	0.230293	0.9781	AHSG
GO:0007223_Wnt_signaling_pathway,_calcium_modulating_pathway	37	2.7	3.82	0.235873	0.990667	LEF1
GO:0070555_response_to_interleukin-1	37	2.7	3.82	0.235873	0.990667	ANXA1
GO:0045494_photoreceptor_cell_maintenance	38	2.63	3.72	0.241413	0.997312	MAK
GO:0051402_neuron_apoptotic_process	38	2.63	3.72	0.241413	0.997312	CIT
GO:0051480_regulation_of_cytosolic_calcium_ion_concentration	38	2.63	3.72	0.241413	0.997312	CALCB
GO:0000083_regulation_of_transcription_involved_in_G1/S_transition_of_mitotic_cell_cycle	23	0	0	1	1
GO:0000165_MAPK_cascade	263	1.14	1.59	0.297129	1	HBEGF;MEF2C;FGFR4
GO:0001508_action_potential	16	0	0	1	1
GO:0001578_microtubule_bundle_formation	29	0	0	1	1
GO:0001755_neural_crest_cell_migration	47	0	0	1	1
GO:0001771_immunological_synapse_formation	11	0	0	1	1
GO:0001774_microglial_cell_activation	28	0	0	1	1
GO:0001778_plasma_membrane_repair	11	0	0	1	1
GO:0001816_cytokine_production	27	0	0	1	1
GO:0001817_regulation_of_cytokine_production	11	0	0	1	1
GO:0001818_negative_regulation_of_cytokine_production	14	0	0	1	1
GO:0001819_positive_regulation_of_cytokine_production	24	0	0	1	1
GO:0001843_neural_tube_closure	77	0	0	1	1
GO:0001881_receptor_recycling	11	0	0	1	1
GO:0001921_positive_regulation_of_receptor_recycling	15	0	0	1	1
GO:0001963_synaptic_transmission,_dopaminergic	15	0	0	1	1
GO:0002028_regulation_of_sodium_ion_transport	18	0	0	1	1
GO:0002031_G_protein-coupled_receptor_internalization	13	0	0	1	1
GO:0002052_positive_regulation_of_neuroblast_proliferation	22	0	0	1	1
GO:0002091_negative_regulation_of_receptor_internalization	12	0	0	1	1
GO:0002092_positive_regulation_of_receptor_internalization	22	0	0	1	1
GO:0002218_activation_of_innate_immune_response	24	0	0	1	1
GO:0002223_stimulatory_C-type_lectin_receptor_signaling_pathway	112	0.89	1.24	0.557574	1	MUC12
GO:0002286_T_cell_activation_involved_in_immune_response	23	0	0	1	1
GO:0002323_natural_killer_cell_activation_involved_in_immune_response	19	0	0	1	1
GO:0002376_immune_system_process	31	0	0	1	1
GO:0002377_immunoglobulin_production	9	0	0	1	1
GO:0002430_complement_receptor_mediated_signaling_pathway	12	0	0	1	1
GO:0002755_MyD88-dependent_toll-like_receptor_signaling_pathway	32	0	0	1	1
GO:0002756_MyD88-independent_toll-like_receptor_signaling_pathway	20	0	0	1	1
GO:0003333_amino_acid_transmembrane_transport	33	0	0	1	1
GO:0005513_detection_of_calcium_ion	13	0	0	1	1
GO:0006120_mitochondrial_electron_transport,_NADH_to_ubiquinone	49	0	0	1	1
GO:0006122_mitochondrial_electron_transport,_ubiquinol_to_cytochrome_c	14	0	0	1	1
GO:0006123_mitochondrial_electron_transport,_cytochrome_c_to_oxygen	20	0	0	1	1
GO:0006283_transcription-coupled_nucleotide-excision_repair	73	0	0	1	1
GO:0006351_transcription,_DNA-templated	103	0.97	1.35	0.527551	1	CEBPA
GO:0006352_DNA-templated_transcription,_initiation	30	0	0	1	1
GO:0006355_regulation_of_transcription,_DNA-templated	492	1.02	1.42	0.285188	1	SALL1;ARNTL;MEF2C;LEF1;HR
GO:0006357_regulation_of_transcription_by_RNA_polymerase_II	1146	0.7	0.96	0.592049	1	PTTG1;ASCL1;DNAJC1;HOPX;HIF3A;NPAS1;LEF1;HNF4A
GO:0006361_transcription_initiation_from_RNA_polymerase_I_promoter	31	0	0	1	1
GO:0006362_transcription_elongation_from_RNA_polymerase_I_promoter	29	0	0	1	1
GO:0006363_termination_of_RNA_polymerase_I_transcription	30	0	0	1	1
GO:0006367_transcription_initiation_from_RNA_polymerase_II_promoter	161	1.24	1.73	0.325288	1	NR1H4;HNF4A
GO:0006368_transcription_elongation_from_RNA_polymerase_II_promoter	74	0	0	1	1
GO:0006369_termination_of_RNA_polymerase_II_transcription	34	0	0	1	1
GO:0006383_transcription_by_RNA_polymerase_III	33	0	0	1	1
GO:0006390_mitochondrial_transcription	11	0	0	1	1
GO:0006465_signal_peptide_processing	11	0	0	1	1
GO:0006509_membrane_protein_ectodomain_proteolysis	20	0	0	1	1
GO:0006612_protein_targeting_to_membrane	47	0	0	1	1
GO:0006614_SRP-dependent_cotranslational_protein_targeting_to_membrane	89	0	0	1	1
GO:0006617_SRP-dependent_cotranslational_protein_targeting_to_membrane,_signal_sequence_recognition	10	0	0	1	1
GO:0006812_cation_transport	35	0	0	1	1
GO:0006813_potassium_ion_transport	69	0	0	1	1
GO:0006814_sodium_ion_transport	81	1.23	1.72	0.445354	1	SLC17A8
GO:0006816_calcium_ion_transport	73	0	0	1	1
GO:0006820_anion_transport	11	0	0	1	1
GO:0006825_copper_ion_transport	14	0	0	1	1
GO:0006826_iron_ion_transport	17	0	0	1	1
GO:0006833_water_transport	15	0	0	1	1
GO:0006836_neurotransmitter_transport	16	0	0	1	1
GO:0006839_mitochondrial_transport	14	0	0	1	1
GO:0006851_mitochondrial_calcium_ion_transmembrane_transport	23	0	0	1	1
GO:0006865_amino_acid_transport	37	0	0	1	1
GO:0006869_lipid_transport	61	0	0	1	1
GO:0006891_intra-Golgi_vesicle-mediated_transport	31	0	0	1	1
GO:0006892_post-Golgi_vesicle-mediated_transport	18	0	0	1	1
GO:0006893_Golgi_to_plasma_membrane_transport	26	0	0	1	1
GO:0006895_Golgi_to_endosome_transport	15	0	0	1	1
GO:0006900_vesicle_budding_from_membrane	11	0	0	1	1
GO:0006906_vesicle_fusion	29	0	0	1	1
GO:0006913_nucleocytoplasmic_transport	22	0	0	1	1
GO:0006959_humoral_immune_response	56	1.79	2.5	0.334564	1	MEF2C
GO:0006978_DNA_damage_response,_signal_transduction_by_p53_class_mediator_resulting_in_transcription_of_p21_class_mediator	14	0	0	1	1
GO:0007009_plasma_membrane_organization	16	0	0	1	1
GO:0007010_cytoskeleton_organization	140	1.43	2	0.269246	1	TPM1;PALLD
GO:0007017_microtubule-based_process	32	0	0	1	1
GO:0007018_microtubule-based_movement	79	1.27	1.76	0.437211	1	KIF14
GO:0007019_microtubule_depolymerization	15	0	0	1	1
GO:0007020_microtubule_nucleation	17	0	0	1	1
GO:0007026_negative_regulation_of_microtubule_depolymerization	25	0	0	1	1
GO:0007041_lysosomal_transport	18	0	0	1	1
GO:0007129_synapsis	24	0	0	1	1
GO:0007130_synaptonemal_complex_assembly	20	0	0	1	1
GO:0007157_heterophilic_cell-cell_adhesion_via_plasma_membrane_cell_adhesion_molecules	46	2.17	3.06	0.284315	1	CDH2
GO:0007158_neuron_cell-cell_adhesion	16	0	0	1	1
GO:0007166_cell_surface_receptor_signaling_pathway	206	0.97	1.35	0.440507	1	ANXA1;CD274
GO:0007169_transmembrane_receptor_protein_tyrosine_kinase_signaling_pathway	106	0.94	1.31	0.537778	1	FGFR4
GO:0007171_activation_of_transmembrane_receptor_protein_tyrosine_kinase_activity	13	0	0	1	1
GO:0007175_negative_regulation_of_epidermal_growth_factor-activated_receptor_activity	14	0	0	1	1
GO:0007187_G_protein-coupled_receptor_signaling_pathway,_coupled_to_cyclic_nucleotide_second_messenger	63	1.59	2.22	0.367634	1	ANXA1
GO:0007188_adenylate_cyclase-modulating_G_protein-coupled_receptor_signaling_pathway	54	0	0	1	1
GO:0007189_adenylate_cyclase-activating_G_protein-coupled_receptor_signaling_pathway	100	1	1.39	0.5171	1	CALCB
GO:0007193_adenylate_cyclase-inhibiting_G_protein-coupled_receptor_signaling_pathway	59	0	0	1	1
GO:0007200_phospholipase_C-activating_G_protein-coupled_receptor_signaling_pathway	57	0	0	1	1
GO:0007204_positive_regulation_of_cytosolic_calcium_ion_concentration	149	0.67	0.93	0.662314	1	CCR7
GO:0007205_protein_kinase_C-activating_G_protein-coupled_receptor_signaling_pathway	28	0	0	1	1
GO:0007212_dopamine_receptor_signaling_pathway	15	0	0	1	1
GO:0007213_G_protein-coupled_acetylcholine_receptor_signaling_pathway	15	0	0	1	1
GO:0007214_gamma-aminobutyric_acid_signaling_pathway	25	0	0	1	1
GO:0007215_glutamate_receptor_signaling_pathway	16	0	0	1	1
GO:0007216_G_protein-coupled_glutamate_receptor_signaling_pathway	15	0	0	1	1
GO:0007218_neuropeptide_signaling_pathway	103	0	0	1	1
GO:0007221_positive_regulation_of_transcription_of_Notch_receptor_target	18	0	0	1	1
GO:0007249_I-kappaB_kinase/NF-kappaB_signaling	64	0	0	1	1
GO:0007254_JNK_cascade	48	2.08	2.93	0.294658	1	TNFRSF19
GO:0007263_nitric_oxide_mediated_signal_transduction	19	0	0	1	1
GO:0007264_small_GTPase_mediated_signal_transduction	82	0	0	1	1
GO:0007265_Ras_protein_signal_transduction	72	1.39	1.94	0.407761	1	DHCR24
GO:0007266_Rho_protein_signal_transduction	74	0	0	1	1
GO:0007267_cell-cell_signaling	216	0.46	0.64	0.793158	1	CXCL14
GO:0007268_chemical_synaptic_transmission	238	0.42	0.58	0.823955	1	GABRP
GO:0007269_neurotransmitter_secretion	48	0	0	1	1
GO:0007271_synaptic_transmission,_cholinergic	24	0	0	1	1
GO:0007274_neuromuscular_synaptic_transmission	29	0	0	1	1
GO:0007288_sperm_axoneme_assembly	12	0	0	1	1
GO:0007342_fusion_of_sperm_to_egg_plasma_membrane_involved_in_single_fertilization	16	0	0	1	1
GO:0007409_axonogenesis	78	0	0	1	1
GO:0007413_axonal_fasciculation	20	0	0	1	1
GO:0007416_synapse_assembly	62	1.61	2.25	0.363012	1	CDH2
GO:0007528_neuromuscular_junction_development	30	0	0	1	1
GO:0008045_motor_neuron_axon_guidance	23	0	0	1	1
GO:0008089_anterograde_axonal_transport	32	0	0	1	1
GO:0008154_actin_polymerization_or_depolymerization	13	0	0	1	1
GO:0008272_sulfate_transport	12	0	0	1	1
GO:0008277_regulation_of_G_protein-coupled_receptor_signaling_pathway	40	2.5	3.53	0.252373	1	RGS4
GO:0008286_insulin_receptor_signaling_pathway	82	0	0	1	1
GO:0008333_endosome_to_lysosome_transport	45	0	0	1	1
GO:0008543_fibroblast_growth_factor_receptor_signaling_pathway	78	1.28	1.78	0.433095	1	FGFR4
GO:0008589_regulation_of_smoothened_signaling_pathway	21	0	0	1	1
GO:0008593_regulation_of_Notch_signaling_pathway	16	0	0	1	1
GO:0008625_extrinsic_apoptotic_signaling_pathway_via_death_domain_receptors	33	0	0	1	1
GO:0008630_intrinsic_apoptotic_signaling_pathway_in_response_to_DNA_damage	45	0	0	1	1
GO:0008631_intrinsic_apoptotic_signaling_pathway_in_response_to_oxidative_stress	14	0	0	1	1
GO:0008643_carbohydrate_transport	23	0	0	1	1
GO:0009303_rRNA_transcription	13	0	0	1	1
GO:0009755_hormone-mediated_signaling_pathway	47	0	0	1	1
GO:0009966_regulation_of_signal_transduction	22	0	0	1	1
GO:0009967_positive_regulation_of_signal_transduction	65	0	0	1	1
GO:0009968_negative_regulation_of_signal_transduction	41	2.44	3.44	0.257793	1	PRR5L
GO:0010469_regulation_of_signaling_receptor_activity	17	0	0	1	1
GO:0010524_positive_regulation_of_calcium_ion_transport_into_cytosol	12	0	0	1	1
GO:0010608_posttranscriptional_regulation_of_gene_expression	24	0	0	1	1
GO:0010738_regulation_of_protein_kinase_A_signaling	11	0	0	1	1
GO:0010765_positive_regulation_of_sodium_ion_transport	16	0	0	1	1
GO:0010803_regulation_of_tumor_necrosis_factor-mediated_signaling_pathway	29	0	0	1	1
GO:0010880_regulation_of_release_of_sequestered_calcium_ion_into_cytosol_by_sarcoplasmic_reticulum	20	0	0	1	1
GO:0010881_regulation_of_cardiac_muscle_contraction_by_regulation_of_the_release_of_sequestered_calcium_ion	24	0	0	1	1
GO:0010917_negative_regulation_of_mitochondrial_membrane_potential	14	0	0	1	1
GO:0010976_positive_regulation_of_neuron_projection_development	107	0	0	1	1
GO:0010977_negative_regulation_of_neuron_projection_development	63	0	0	1	1
GO:0014002_astrocyte_development	15	0	0	1	1
GO:0014032_neural_crest_cell_development	20	0	0	1	1
GO:0014065_phosphatidylinositol_3-kinase_signaling	33	0	0	1	1
GO:0014066_regulation_of_phosphatidylinositol_3-kinase_signaling	21	0	0	1	1
GO:0014067_negative_regulation_of_phosphatidylinositol_3-kinase_signaling	16	0	0	1	1
GO:0014068_positive_regulation_of_phosphatidylinositol_3-kinase_signaling	87	1.15	1.6	0.469087	1	PRR5L
GO:0015031_protein_transport	310	0.32	0.44	0.89623	1	ECT2
GO:0015671_oxygen_transport	15	0	0	1	1
GO:0015693_magnesium_ion_transport	13	0	0	1	1
GO:0015695_organic_cation_transport	11	0	0	1	1
GO:0015698_inorganic_anion_transport	24	0	0	1	1
GO:0015701_bicarbonate_transport	42	0	0	1	1
GO:0015711_organic_anion_transport	14	0	0	1	1
GO:0015718_monocarboxylic_acid_transport	13	0	0	1	1
GO:0015804_neutral_amino_acid_transport	13	0	0	1	1
GO:0015867_ATP_transport	12	0	0	1	1
GO:0015914_phospholipid_transport	28	0	0	1	1
GO:0015918_sterol_transport	14	0	0	1	1
GO:0015986_ATP_synthesis_coupled_proton_transport	12	0	0	1	1
GO:0016050_vesicle_organization	13	0	0	1	1
GO:0016055_Wnt_signaling_pathway	185	0	0	1	1
GO:0016056_rhodopsin_mediated_signaling_pathway	11	0	0	1	1
GO:0016064_immunoglobulin_mediated_immune_response	13	0	0	1	1
GO:0016079_synaptic_vesicle_exocytosis	25	0	0	1	1
GO:0016081_synaptic_vesicle_docking	11	0	0	1	1
GO:0016082_synaptic_vesicle_priming	15	0	0	1	1
GO:0016192_vesicle-mediated_transport	134	0.75	1.03	0.623211	1	SYTL2
GO:0016197_endosomal_transport	76	0	0	1	1
GO:0016254_preassembly_of_GPI_anchor_in_ER_membrane	17	0	0	1	1
GO:0016358_dendrite_development	35	0	0	1	1
GO:0016446_somatic_hypermutation_of_immunoglobulin_genes	14	0	0	1	1
GO:0016601_Rac_protein_signal_transduction	21	0	0	1	1
GO:0017158_regulation_of_calcium_ion-dependent_exocytosis	18	0	0	1	1
GO:0019083_viral_transcription	109	0	0	1	1
GO:0019221_cytokine-mediated_signaling_pathway	279	1.08	1.5	0.328731	1	ANXA1;IL1RAP;CEBPA
GO:0019226_transmission_of_nerve_impulse	19	0	0	1	1
GO:0019228_neuronal_action_potential	29	0	0	1	1
GO:0019933_cAMP-mediated_signaling	27	0	0	1	1
GO:0019934_cGMP-mediated_signaling	23	0	0	1	1
GO:0021522_spinal_cord_motor_neuron_differentiation	17	0	0	1	1
GO:0021675_nerve_development	13	0	0	1	1
GO:0021895_cerebral_cortex_neuron_differentiation	12	0	0	1	1
GO:0021915_neural_tube_development	28	0	0	1	1
GO:0022008_neurogenesis	45	2.22	3.13	0.279087	1	ASCL1
GO:0022400_regulation_of_rhodopsin_mediated_signaling_pathway	26	0	0	1	1
GO:0022900_electron_transport_chain	69	1.45	2.02	0.394675	1	TXNRD1
GO:0022904_respiratory_electron_transport_chain	15	0	0	1	1
GO:0023014_signal_transduction_by_protein_phosphorylation	49	0	0	1	1
GO:0030030_cell_projection_organization	37	0	0	1	1
GO:0030031_cell_projection_assembly	18	0	0	1	1
GO:0030036_actin_cytoskeleton_organization	150	0.67	0.92	0.664772	1	PALLD
GO:0030048_actin_filament-based_movement	19	0	0	1	1
GO:0030178_negative_regulation_of_Wnt_signaling_pathway	43	2.33	3.28	0.268517	1	SFRP1
GO:0030182_neuron_differentiation	134	1.49	2.09	0.25317	1	ASCL1;MEF2C
GO:0030322_stabilization_of_membrane_potential	17	0	0	1	1
GO:0030330_DNA_damage_response,_signal_transduction_by_p53_class_mediator	17	0	0	1	1
GO:0030511_positive_regulation_of_transforming_growth_factor_beta_receptor_signaling_pathway	29	0	0	1	1
GO:0030513_positive_regulation_of_BMP_signaling_pathway	33	0	0	1	1
GO:0030516_regulation_of_axon_extension	14	0	0	1	1
GO:0030517_negative_regulation_of_axon_extension	16	0	0	1	1
GO:0030520_intracellular_estrogen_receptor_signaling_pathway	21	0	0	1	1
GO:0030521_androgen_receptor_signaling_pathway	36	0	0	1	1
GO:0030705_cytoskeleton-dependent_intracellular_transport	16	0	0	1	1
GO:0030833_regulation_of_actin_filament_polymerization	23	0	0	1	1
GO:0030837_negative_regulation_of_actin_filament_polymerization	16	0	0	1	1
GO:0030948_negative_regulation_of_vascular_endothelial_growth_factor_receptor_signaling_pathway	13	0	0	1	1
GO:0030949_positive_regulation_of_vascular_endothelial_growth_factor_receptor_signaling_pathway	19	0	0	1	1
GO:0030950_establishment_or_maintenance_of_actin_cytoskeleton_polarity	12	0	0	1	1
GO:0030970_retrograde_protein_transport,_ER_to_cytosol	16	0	0	1	1
GO:0031098_stress-activated_protein_kinase_signaling_cascade	50	0	0	1	1
GO:0031103_axon_regeneration	16	0	0	1	1
GO:0031110_regulation_of_microtubule_polymerization_or_depolymerization	13	0	0	1	1
GO:0031113_regulation_of_microtubule_polymerization	11	0	0	1	1
GO:0031115_negative_regulation_of_microtubule_polymerization	13	0	0	1	1
GO:0031116_positive_regulation_of_microtubule_polymerization	26	0	0	1	1
GO:0031122_cytoplasmic_microtubule_organization	43	0	0	1	1
GO:0031175_neuron_projection_development	117	0	0	1	1
GO:0031290_retinal_ganglion_cell_axon_guidance	19	0	0	1	1
GO:0031293_membrane_protein_intracellular_domain_proteolysis	17	0	0	1	1
GO:0031629_synaptic_vesicle_fusion_to_presynaptic_active_zone_membrane	13	0	0	1	1
GO:0031663_lipopolysaccharide-mediated_signaling_pathway	34	0	0	1	1
GO:0031665_negative_regulation_of_lipopolysaccharide-mediated_signaling_pathway	11	0	0	1	1
GO:0031929_TOR_signaling	19	0	0	1	1
GO:0032008_positive_regulation_of_TOR_signaling	33	0	0	1	1
GO:0032012_regulation_of_ARF_protein_signal_transduction	17	0	0	1	1
GO:0032088_negative_regulation_of_NF-kappaB_transcription_factor_activity	84	1.19	1.66	0.45735	1	NR1H4
GO:0032228_regulation_of_synaptic_transmission,_GABAergic	14	0	0	1	1
GO:0032230_positive_regulation_of_synaptic_transmission,_GABAergic	12	0	0	1	1
GO:0032402_melanosome_transport	21	0	0	1	1
GO:0032465_regulation_of_cytokinesis	41	2.44	3.44	0.257793	1	AURKA
GO:0032469_endoplasmic_reticulum_calcium_ion_homeostasis	15	0	0	1	1
GO:0032479_regulation_of_type_I_interferon_production	12	0	0	1	1
GO:0032480_negative_regulation_of_type_I_interferon_production	31	0	0	1	1
GO:0032481_positive_regulation_of_type_I_interferon_production	51	0	0	1	1
GO:0032486_Rap_protein_signal_transduction	10	0	0	1	1
GO:0032509_endosome_transport_via_multivesicular_body_sorting_pathway	12	0	0	1	1
GO:0032688_negative_regulation_of_interferon-beta_production	12	0	0	1	1
GO:0032691_negative_regulation_of_interleukin-1_beta_production	15	0	0	1	1
GO:0032695_negative_regulation_of_interleukin-12_production	12	0	0	1	1
GO:0032700_negative_regulation_of_interleukin-17_production	14	0	0	1	1
GO:0032722_positive_regulation_of_chemokine_production	19	0	0	1	1
GO:0032727_positive_regulation_of_interferon-alpha_production	12	0	0	1	1
GO:0032728_positive_regulation_of_interferon-beta_production	26	0	0	1	1
GO:0032729_positive_regulation_of_interferon-gamma_production	45	0	0	1	1
GO:0032731_positive_regulation_of_interleukin-1_beta_production	16	0	0	1	1
GO:0032740_positive_regulation_of_interleukin-17_production	14	0	0	1	1
GO:0032753_positive_regulation_of_interleukin-4_production	21	0	0	1	1
GO:0032755_positive_regulation_of_interleukin-6_production	58	0	0	1	1
GO:0032757_positive_regulation_of_interleukin-8_production	27	0	0	1	1
GO:0032786_positive_regulation_of_DNA-templated_transcription,_elongation	15	0	0	1	1
GO:0032793_positive_regulation_of_CREB_transcription_factor_activity	19	0	0	1	1
GO:0032801_receptor_catabolic_process	13	0	0	1	1
GO:0032897_negative_regulation_of_viral_transcription	12	0	0	1	1
GO:0032924_activin_receptor_signaling_pathway	17	0	0	1	1
GO:0032956_regulation_of_actin_cytoskeleton_organization	68	0	0	1	1
GO:0032968_positive_regulation_of_transcription_elongation_from_RNA_polymerase_II_promoter	18	0	0	1	1
GO:0033146_regulation_of_intracellular_estrogen_receptor_signaling_pathway	15	0	0	1	1
GO:0033148_positive_regulation_of_intracellular_estrogen_receptor_signaling_pathway	11	0	0	1	1
GO:0033173_calcineurin-NFAT_signaling_cascade	12	0	0	1	1
GO:0034122_negative_regulation_of_toll-like_receptor_signaling_pathway	17	0	0	1	1
GO:0034244_negative_regulation_of_transcription_elongation_from_RNA_polymerase_II_promoter	12	0	0	1	1
GO:0034314_Arp2/3_complex-mediated_actin_nucleation	19	0	0	1	1
GO:0034341_response_to_interferon-gamma	22	0	0	1	1
GO:0034453_microtubule_anchoring	15	0	0	1	1
GO:0034765_regulation_of_ion_transmembrane_transport	113	0.88	1.23	0.560791	1	TPCN2
GO:0035024_negative_regulation_of_Rho_protein_signal_transduction	22	0	0	1	1
GO:0035082_axoneme_assembly	18	0	0	1	1
GO:0035235_ionotropic_glutamate_receptor_signaling_pathway	23	0	0	1	1
GO:0035329_hippo_signaling	27	0	0	1	1
GO:0035418_protein_localization_to_synapse	12	0	0	1	1
GO:0035457_cellular_response_to_interferon-alpha	11	0	0	1	1
GO:0035458_cellular_response_to_interferon-beta	19	0	0	1	1
GO:0035556_intracellular_signal_transduction	374	1.07	1.49	0.28688	1	CIT;ECT2;DNMBP;MAK
GO:0035584_calcium-mediated_signaling_using_intracellular_calcium_source	22	0	0	1	1
GO:0035589_G_protein-coupled_purinergic_nucleotide_receptor_signaling_pathway	13	0	0	1	1
GO:0035666_TRIF-dependent_toll-like_receptor_signaling_pathway	29	0	0	1	1
GO:0035721_intraciliary_retrograde_transport	11	0	0	1	1
GO:0035722_interleukin-12-mediated_signaling_pathway	47	0	0	1	1
GO:0035723_interleukin-15-mediated_signaling_pathway	13	0	0	1	1
GO:0035725_sodium_ion_transmembrane_transport	66	1.52	2.12	0.381302	1	SLC20A2
GO:0035735_intraciliary_transport_involved_in_cilium_assembly	40	0	0	1	1
GO:0038061_NIK/NF-kappaB_signaling	70	0	0	1	1
GO:0038084_vascular_endothelial_growth_factor_signaling_pathway	14	0	0	1	1
GO:0038095_Fc-epsilon_receptor_signaling_pathway	110	0	0	1	1
GO:0038096_Fc-gamma_receptor_signaling_pathway_involved_in_phagocytosis	71	0	0	1	1
GO:0038110_interleukin-2-mediated_signaling_pathway	11	0	0	1	1
GO:0038111_interleukin-7-mediated_signaling_pathway	30	0	0	1	1
GO:0038180_nerve_growth_factor_signaling_pathway	12	0	0	1	1
GO:0040037_negative_regulation_of_fibroblast_growth_factor_receptor_signaling_pathway	20	0	0	1	1
GO:0042136_neurotransmitter_biosynthetic_process	11	0	0	1	1
GO:0042147_retrograde_transport,_endosome_to_Golgi	77	0	0	1	1
GO:0042391_regulation_of_membrane_potential	101	0.99	1.37	0.520609	1	GABRP
GO:0042462_eye_photoreceptor_cell_development	18	0	0	1	1
GO:0042551_neuron_maturation	14	0	0	1	1
GO:0042770_signal_transduction_in_response_to_DNA_damage	12	0	0	1	1
GO:0042771_intrinsic_apoptotic_signaling_pathway_in_response_to_DNA_damage_by_p53_class_mediator	29	0	0	1	1
GO:0042776_mitochondrial_ATP_synthesis_coupled_proton_transport	21	0	0	1	1
GO:0042789_mRNA_transcription_by_RNA_polymerase_II	19	0	0	1	1
GO:0042795_snRNA_transcription_by_RNA_polymerase_II	70	0	0	1	1
GO:0042994_cytoplasmic_sequestering_of_transcription_factor	11	0	0	1	1
GO:0043113_receptor_clustering	25	0	0	1	1
GO:0043122_regulation_of_I-kappaB_kinase/NF-kappaB_signaling	17	0	0	1	1
GO:0043124_negative_regulation_of_I-kappaB_kinase/NF-kappaB_signaling	48	2.08	2.93	0.294658	1	NR1H4
GO:0043252_sodium-independent_organic_anion_transport	16	0	0	1	1
GO:0043408_regulation_of_MAPK_cascade	59	0	0	1	1
GO:0043409_negative_regulation_of_MAPK_cascade	25	0	0	1	1
GO:0043433_negative_regulation_of_DNA-binding_transcription_factor_activity	73	1.37	1.91	0.41206	1	SMAD7
GO:0043491_protein_kinase_B_signaling	38	0	0	1	1
GO:0043517_positive_regulation_of_DNA_damage_response,_signal_transduction_by_p53_class_mediator	12	0	0	1	1
GO:0043524_negative_regulation_of_neuron_apoptotic_process	139	1.44	2.01	0.266566	1	MEF2C;KIF14
GO:0043525_positive_regulation_of_neuron_apoptotic_process	53	1.89	2.65	0.31987	1	ASCL1
GO:0043568_positive_regulation_of_insulin-like_growth_factor_receptor_signaling_pathway	13	0	0	1	1
GO:0043922_negative_regulation_by_host_of_viral_transcription	12	0	0	1	1
GO:0043950_positive_regulation_of_cAMP-mediated_signaling	15	0	0	1	1
GO:0043951_negative_regulation_of_cAMP-mediated_signaling	14	0	0	1	1
GO:0045022_early_endosome_to_late_endosome_transport	22	0	0	1	1
GO:0045078_positive_regulation_of_interferon-gamma_biosynthetic_process	13	0	0	1	1
GO:0045080_positive_regulation_of_chemokine_biosynthetic_process	11	0	0	1	1
GO:0045086_positive_regulation_of_interleukin-2_biosynthetic_process	13	0	0	1	1
GO:0045088_regulation_of_innate_immune_response	21	0	0	1	1
GO:0045089_positive_regulation_of_innate_immune_response	23	0	0	1	1
GO:0045104_intermediate_filament_cytoskeleton_organization	22	0	0	1	1
GO:0045410_positive_regulation_of_interleukin-6_biosynthetic_process	15	0	0	1	1
GO:0045664_regulation_of_neuron_differentiation	22	0	0	1	1
GO:0045665_negative_regulation_of_neuron_differentiation	60	1.67	2.33	0.353666	1	ASCL1
GO:0045742_positive_regulation_of_epidermal_growth_factor_receptor_signaling_pathway	21	0	0	1	1
GO:0045744_negative_regulation_of_G_protein-coupled_receptor_signaling_pathway	12	0	0	1	1
GO:0045746_negative_regulation_of_Notch_signaling_pathway	42	0	0	1	1
GO:0045747_positive_regulation_of_Notch_signaling_pathway	51	1.96	2.75	0.309895	1	ASCL1
GO:0045773_positive_regulation_of_axon_extension	34	0	0	1	1
GO:0045824_negative_regulation_of_innate_immune_response	15	0	0	1	1
GO:0045879_negative_regulation_of_smoothened_signaling_pathway	24	0	0	1	1
GO:0045956_positive_regulation_of_calcium_ion-dependent_exocytosis	16	0	0	1	1
GO:0046328_regulation_of_JNK_cascade	15	0	0	1	1
GO:0046579_positive_regulation_of_Ras_protein_signal_transduction	29	0	0	1	1
GO:0046626_regulation_of_insulin_receptor_signaling_pathway	12	0	0	1	1
GO:0046785_microtubule_polymerization	12	0	0	1	1
GO:0046902_regulation_of_mitochondrial_membrane_permeability	11	0	0	1	1
GO:0046907_intracellular_transport	18	0	0	1	1
GO:0047496_vesicle_transport_along_microtubule	16	0	0	1	1
GO:0048010_vascular_endothelial_growth_factor_receptor_signaling_pathway	64	0	0	1	1
GO:0048011_neurotrophin_TRK_receptor_signaling_pathway	20	0	0	1	1
GO:0048012_hepatocyte_growth_factor_receptor_signaling_pathway	12	0	0	1	1
GO:0048013_ephrin_receptor_signaling_pathway	85	0	0	1	1
GO:0048015_phosphatidylinositol-mediated_signaling	50	2	2.81	0.304853	1	EZR
GO:0048016_inositol_phosphate-mediated_signaling	12	0	0	1	1
GO:0048096_chromatin-mediated_maintenance_of_transcription	11	0	0	1	1
GO:0048143_astrocyte_activation	17	0	0	1	1
GO:0048167_regulation_of_synaptic_plasticity	48	2.08	2.93	0.294658	1	MEF2C
GO:0048168_regulation_of_neuronal_synaptic_plasticity	15	0	0	1	1
GO:0048169_regulation_of_long-term_neuronal_synaptic_plasticity	21	0	0	1	1
GO:0048172_regulation_of_short-term_neuronal_synaptic_plasticity	14	0	0	1	1
GO:0048208_COPII_vesicle_coating	63	1.59	2.22	0.367634	1	SERPINA1
GO:0048278_vesicle_docking	22	0	0	1	1
GO:0048384_retinoic_acid_receptor_signaling_pathway	15	0	0	1	1
GO:0048488_synaptic_vesicle_endocytosis	35	0	0	1	1
GO:0048489_synaptic_vesicle_transport	15	0	0	1	1
GO:0048490_anterograde_synaptic_vesicle_transport	16	0	0	1	1
GO:0048675_axon_extension	26	0	0	1	1
GO:0048678_response_to_axon_injury	29	0	0	1	1
GO:0048681_negative_regulation_of_axon_regeneration	11	0	0	1	1
GO:0048711_positive_regulation_of_astrocyte_differentiation	11	0	0	1	1
GO:0048791_calcium_ion-regulated_exocytosis_of_neurotransmitter	14	0	0	1	1
GO:0048812_neuron_projection_morphogenesis	60	1.67	2.33	0.353666	1	WEE1
GO:0048813_dendrite_morphogenesis	35	0	0	1	1
GO:0048814_regulation_of_dendrite_morphogenesis	21	0	0	1	1
GO:0048843_negative_regulation_of_axon_extension_involved_in_axon_guidance	26	0	0	1	1
GO:0050434_positive_regulation_of_viral_transcription	27	0	0	1	1
GO:0050710_negative_regulation_of_cytokine_secretion	15	0	0	1	1
GO:0050715_positive_regulation_of_cytokine_secretion	27	0	0	1	1
GO:0050718_positive_regulation_of_interleukin-1_beta_secretion	33	0	0	1	1
GO:0050768_negative_regulation_of_neurogenesis	22	0	0	1	1
GO:0050769_positive_regulation_of_neurogenesis	28	0	0	1	1
GO:0050771_negative_regulation_of_axonogenesis	21	0	0	1	1
GO:0050773_regulation_of_dendrite_development	15	0	0	1	1
GO:0050775_positive_regulation_of_dendrite_morphogenesis	21	0	0	1	1
GO:0050776_regulation_of_immune_response	145	1.38	1.93	0.28264	1	CD34;C3
GO:0050804_modulation_of_chemical_synaptic_transmission	57	0	0	1	1
GO:0050806_positive_regulation_of_synaptic_transmission	18	0	0	1	1
GO:0050807_regulation_of_synapse_organization	21	0	0	1	1
GO:0050808_synapse_organization	39	0	0	1	1
GO:0050848_regulation_of_calcium-mediated_signaling	12	0	0	1	1
GO:0050850_positive_regulation_of_calcium-mediated_signaling	17	0	0	1	1
GO:0050852_T_cell_receptor_signaling_pathway	165	0	0	1	1
GO:0050855_regulation_of_B_cell_receptor_signaling_pathway	11	0	0	1	1
GO:0050884_neuromuscular_process_controlling_posture	12	0	0	1	1
GO:0050885_neuromuscular_process_controlling_balance	45	0	0	1	1
GO:0050905_neuromuscular_process	19	0	0	1	1
GO:0051013_microtubule_severing	11	0	0	1	1
GO:0051017_actin_filament_bundle_assembly	40	2.5	3.53	0.252373	1	EZR
GO:0051024_positive_regulation_of_immunoglobulin_secretion	11	0	0	1	1
GO:0051028_mRNA_transport	43	0	0	1	1
GO:0051044_positive_regulation_of_membrane_protein_ectodomain_proteolysis	15	0	0	1	1
GO:0051056_regulation_of_small_GTPase_mediated_signal_transduction	141	1.42	1.98	0.271926	1	ECT2;ARHGEF26
GO:0051090_regulation_of_DNA-binding_transcription_factor_activity	27	0	0	1	1
GO:0051091_positive_regulation_of_DNA-binding_transcription_factor_activity	111	0	0	1	1
GO:0051092_positive_regulation_of_NF-kappaB_transcription_factor_activity	149	0.67	0.93	0.662314	1	IL1RAP
GO:0051279_regulation_of_release_of_sequestered_calcium_ion_into_cytosol	12	0	0	1	1
GO:0051403_stress-activated_MAPK_cascade	27	0	0	1	1
GO:0051481_negative_regulation_of_cytosolic_calcium_ion_concentration	12	0	0	1	1
GO:0051482_positive_regulation_of_cytosolic_calcium_ion_concentration_involved_in_phospholipase_C-activating_G_protein-coupled_signaling_pathway	31	0	0	1	1
GO:0051560_mitochondrial_calcium_ion_homeostasis	15	0	0	1	1
GO:0051561_positive_regulation_of_mitochondrial_calcium_ion_concentration	11	0	0	1	1
GO:0051591_response_to_cAMP	44	0	0	1	1
GO:0051881_regulation_of_mitochondrial_membrane_potential	28	0	0	1	1
GO:0051896_regulation_of_protein_kinase_B_signaling	11	0	0	1	1
GO:0051898_negative_regulation_of_protein_kinase_B_signaling	62	0	0	1	1
GO:0051899_membrane_depolarization	22	0	0	1	1
GO:0051926_negative_regulation_of_calcium_ion_transport	15	0	0	1	1
GO:0051928_positive_regulation_of_calcium_ion_transport	29	0	0	1	1
GO:0051932_synaptic_transmission,_GABAergic	13	0	0	1	1
GO:0051965_positive_regulation_of_synapse_assembly	63	1.59	2.22	0.367634	1	IL1RAP
GO:0051968_positive_regulation_of_synaptic_transmission,_glutamatergic	29	0	0	1	1
GO:0055074_calcium_ion_homeostasis	22	0	0	1	1
GO:0055085_transmembrane_transport	272	1.1	1.54	0.314894	1	ABCG1;ABCG4;APOA1
GO:0060071_Wnt_signaling_pathway,_planar_cell_polarity_pathway	89	0	0	1	1
GO:0060078_regulation_of_postsynaptic_membrane_potential	32	0	0	1	1
GO:0060079_excitatory_postsynaptic_potential	63	1.59	2.22	0.367634	1	MEF2C
GO:0060088_auditory_receptor_cell_stereocilium_organization	11	0	0	1	1
GO:0060122_inner_ear_receptor_cell_stereocilium_organization	17	0	0	1	1
GO:0060252_positive_regulation_of_glial_cell_proliferation	17	0	0	1	1
GO:0060291_long-term_synaptic_potentiation	47	0	0	1	1
GO:0060292_long-term_synaptic_depression	17	0	0	1	1
GO:0060307_regulation_of_ventricular_cardiac_muscle_cell_membrane_repolarization	23	0	0	1	1
GO:0060314_regulation_of_ryanodine-sensitive_calcium-release_channel_activity	16	0	0	1	1
GO:0060315_negative_regulation_of_ryanodine-sensitive_calcium-release_channel_activity	11	0	0	1	1
GO:0060333_interferon-gamma-mediated_signaling_pathway	70	0	0	1	1
GO:0060334_regulation_of_interferon-gamma-mediated_signaling_pathway	13	0	0	1	1
GO:0060337_type_I_interferon_signaling_pathway	67	0	0	1	1
GO:0060339_negative_regulation_of_type_I_interferon-mediated_signaling_pathway	14	0	0	1	1
GO:0060340_positive_regulation_of_type_I_interferon-mediated_signaling_pathway	13	0	0	1	1
GO:0060391_positive_regulation_of_SMAD_protein_signal_transduction	12	0	0	1	1
GO:0060396_growth_hormone_receptor_signaling_pathway	12	0	0	1	1
GO:0060402_calcium_ion_transport_into_cytosol	12	0	0	1	1
GO:0060765_regulation_of_androgen_receptor_signaling_pathway	11	0	0	1	1
GO:0060828_regulation_of_canonical_Wnt_signaling_pathway	26	0	0	1	1
GO:0061025_membrane_fusion	31	0	0	1	1
GO:0061314_Notch_signaling_involved_in_heart_development	11	0	0	1	1
GO:0061351_neural_precursor_cell_proliferation	11	0	0	1	1
GO:0061418_regulation_of_transcription_from_RNA_polymerase_II_promoter_in_response_to_hypoxia	71	1.41	1.96	0.403431	1	HIF3A
GO:0061564_axon_development	13	0	0	1	1
GO:0061640_cytoskeleton-dependent_cytokinesis	22	0	0	1	1
GO:0061844_antimicrobial_humoral_immune_response_mediated_by_antimicrobial_peptide	67	1.49	2.08	0.385792	1	HIST1H2BE
GO:0070050_neuron_cellular_homeostasis	15	0	0	1	1
GO:0070059_intrinsic_apoptotic_signaling_pathway_in_response_to_endoplasmic_reticulum_stress	33	0	0	1	1
GO:0070098_chemokine-mediated_signaling_pathway	70	1.43	1.99	0.399069	1	ACKR1
GO:0070104_negative_regulation_of_interleukin-6-mediated_signaling_pathway	11	0	0	1	1
GO:0070106_interleukin-27-mediated_signaling_pathway	11	0	0	1	1
GO:0070371_ERK1_and_ERK2_cascade	27	0	0	1	1
GO:0070373_negative_regulation_of_ERK1_and_ERK2_cascade	74	1.35	1.88	0.416328	1	EZR
GO:0070423_nucleotide-binding_oligomerization_domain_containing_signaling_pathway	22	0	0	1	1
GO:0070498_interleukin-1-mediated_signaling_pathway	96	1.04	1.45	0.502806	1	IL1RAP
GO:0070507_regulation_of_microtubule_cytoskeleton_organization	31	0	0	1	1
GO:0070509_calcium_ion_import	23	0	0	1	1
GO:0070588_calcium_ion_transmembrane_transport	116	0	0	1	1
GO:0070757_interleukin-35-mediated_signaling_pathway	11	0	0	1	1
GO:0070885_negative_regulation_of_calcineurin-NFAT_signaling_cascade	14	0	0	1	1
GO:0070886_positive_regulation_of_calcineurin-NFAT_signaling_cascade	16	0	0	1	1
GO:0071320_cellular_response_to_cAMP	52	1.92	2.7	0.3149	1	EZR
GO:0071346_cellular_response_to_interferon-gamma	94	1.06	1.48	0.495502	1	CLDN1
GO:0071354_cellular_response_to_interleukin-6	19	0	0	1	1
GO:0071526_semaphorin-plexin_signaling_pathway	34	0	0	1	1
GO:0071577_zinc_ion_transmembrane_transport	16	0	0	1	1
GO:0071679_commissural_neuron_axon_guidance	12	0	0	1	1
GO:0071711_basement_membrane_organization	11	0	0	1	1
GO:0071805_potassium_ion_transmembrane_transport	116	0	0	1	1
GO:0071880_adenylate_cyclase-activating_adrenergic_receptor_signaling_pathway	19	0	0	1	1
GO:0072332_intrinsic_apoptotic_signaling_pathway_by_p53_class_mediator	24	0	0	1	1
GO:0072425_signal_transduction_involved_in_G2_DNA_damage_checkpoint	11	0	0	1	1
GO:0072657_protein_localization_to_membrane	19	0	0	1	1
GO:0075733_intracellular_transport_of_virus	50	0	0	1	1
GO:0086002_cardiac_muscle_cell_action_potential_involved_in_contraction	16	0	0	1	1
GO:0086005_ventricular_cardiac_muscle_cell_action_potential	18	0	0	1	1
GO:0086010_membrane_depolarization_during_action_potential	16	0	0	1	1
GO:0086012_membrane_depolarization_during_cardiac_muscle_cell_action_potential	12	0	0	1	1
GO:0090090_negative_regulation_of_canonical_Wnt_signaling_pathway	175	1.14	1.59	0.362068	1	CDH2;SFRP1
GO:0090197_positive_regulation_of_chemokine_secretion	12	0	0	1	1
GO:0090263_positive_regulation_of_canonical_Wnt_signaling_pathway	144	1.39	1.94	0.279963	1	SFRP1;ARNTL
GO:0097120_receptor_localization_to_synapse	11	0	0	1	1
GO:0097190_apoptotic_signaling_pathway	59	0	0	1	1
GO:0097191_extrinsic_apoptotic_signaling_pathway	44	2.27	3.2	0.273822	1	KRT8
GO:0097192_extrinsic_apoptotic_signaling_pathway_in_absence_of_ligand	31	0	0	1	1
GO:0097193_intrinsic_apoptotic_signaling_pathway	26	0	0	1	1
GO:0097320_plasma_membrane_tubulation	16	0	0	1	1
GO:0097623_potassium_ion_export_across_plasma_membrane	15	0	0	1	1
GO:0098655_cation_transmembrane_transport	19	0	0	1	1
GO:0098656_anion_transmembrane_transport	37	0	0	1	1
GO:0098664_G_protein-coupled_serotonin_receptor_signaling_pathway	27	0	0	1	1
GO:0098719_sodium_ion_import_across_plasma_membrane	15	0	0	1	1
GO:0098742_cell-cell_adhesion_via_plasma-membrane_adhesion_molecules	13	0	0	1	1
GO:0098915_membrane_repolarization_during_ventricular_cardiac_muscle_cell_action_potential	12	0	0	1	1
GO:0098962_regulation_of_postsynaptic_neurotransmitter_receptor_activity	12	0	0	1	1
GO:0098974_postsynaptic_actin_cytoskeleton_organization	11	0	0	1	1
GO:0099054_presynapse_assembly	13	0	0	1	1
GO:0099072_regulation_of_postsynaptic_membrane_neurotransmitter_receptor_levels	11	0	0	1	1
GO:0099149_regulation_of_postsynaptic_neurotransmitter_receptor_internalization	11	0	0	1	1
GO:0099175_regulation_of_postsynapse_organization	17	0	0	1	1
GO:0099509_regulation_of_presynaptic_cytosolic_calcium_ion_concentration	13	0	0	1	1
GO:0099566_regulation_of_postsynaptic_cytosolic_calcium_ion_concentration	11	0	0	1	1
GO:0150078_positive_regulation_of_neuroinflammatory_response	11	0	0	1	1
GO:1900006_positive_regulation_of_dendrite_development	14	0	0	1	1
GO:1900016_negative_regulation_of_cytokine_production_involved_in_inflammatory_response	21	0	0	1	1
GO:1900017_positive_regulation_of_cytokine_production_involved_in_inflammatory_response	20	0	0	1	1
GO:1900165_negative_regulation_of_interleukin-6_secretion	12	0	0	1	1
GO:1900271_regulation_of_long-term_synaptic_potentiation	14	0	0	1	1
GO:1900272_negative_regulation_of_long-term_synaptic_potentiation	13	0	0	1	1
GO:1900740_positive_regulation_of_protein_insertion_into_mitochondrial_membrane_involved_in_apoptotic_signaling_pathway	26	0	0	1	1
GO:1900745_positive_regulation_of_p38MAPK_cascade	32	0	0	1	1
GO:1900747_negative_regulation_of_vascular_endothelial_growth_factor_signaling_pathway	14	0	0	1	1
GO:1901215_negative_regulation_of_neuron_death	53	1.89	2.65	0.31987	1	CD34
GO:1901216_positive_regulation_of_neuron_death	37	0	0	1	1
GO:1901222_regulation_of_NIK/NF-kappaB_signaling	12	0	0	1	1
GO:1901223_negative_regulation_of_NIK/NF-kappaB_signaling	33	0	0	1	1
GO:1901224_positive_regulation_of_NIK/NF-kappaB_signaling	62	0	0	1	1
GO:1901379_regulation_of_potassium_ion_transmembrane_transport	16	0	0	1	1
GO:1901381_positive_regulation_of_potassium_ion_transmembrane_transport	12	0	0	1	1
GO:1901796_regulation_of_signal_transduction_by_p53_class_mediator	131	0.76	1.06	0.614866	1	AURKA
GO:1902166_negative_regulation_of_intrinsic_apoptotic_signaling_pathway_in_response_to_DNA_damage_by_p53_class_mediator	16	0	0	1	1
GO:1902176_negative_regulation_of_oxidative_stress-induced_intrinsic_apoptotic_signaling_pathway	13	0	0	1	1
GO:1902230_negative_regulation_of_intrinsic_apoptotic_signaling_pathway_in_response_to_DNA_damage	15	0	0	1	1
GO:1902236_negative_regulation_of_endoplasmic_reticulum_stress-induced_intrinsic_apoptotic_signaling_pathway	19	0	0	1	1
GO:1902287_semaphorin-plexin_signaling_pathway_involved_in_axon_guidance	12	0	0	1	1
GO:1902358_sulfate_transmembrane_transport	16	0	0	1	1
GO:1902475_L-alpha-amino_acid_transmembrane_transport	11	0	0	1	1
GO:1902476_chloride_transmembrane_transport	88	1.14	1.58	0.472944	1	GABRP
GO:1902600_proton_transmembrane_transport	114	0.88	1.21	0.563984	1	SLC2A12
GO:1902894_negative_regulation_of_pri-miRNA_transcription_by_RNA_polymerase_II	13	0	0	1	1
GO:1902895_positive_regulation_of_pri-miRNA_transcription_by_RNA_polymerase_II	31	0	0	1	1
GO:1903076_regulation_of_protein_localization_to_plasma_membrane	16	0	0	1	1
GO:1903077_negative_regulation_of_protein_localization_to_plasma_membrane	18	0	0	1	1
GO:1903204_negative_regulation_of_oxidative_stress-induced_neuron_death	13	0	0	1	1
GO:1903507_negative_regulation_of_nucleic_acid-templated_transcription	53	0	0	1	1
GO:1903508_positive_regulation_of_nucleic_acid-templated_transcription	82	1.22	1.7	0.449382	1	MAK
GO:1903830_magnesium_ion_transmembrane_transport	15	0	0	1	1
GO:1903861_positive_regulation_of_dendrite_extension	22	0	0	1	1
GO:1903980_positive_regulation_of_microglial_cell_activation	11	0	0	1	1
GO:1904262_negative_regulation_of_TORC1_signaling	18	0	0	1	1
GO:1904263_positive_regulation_of_TORC1_signaling	14	0	0	1	1
GO:1990090_cellular_response_to_nerve_growth_factor_stimulus	35	0	0	1	1
GO:1990126_retrograde_transport,_endosome_to_plasma_membrane	18	0	0	1	1
GO:1990440_positive_regulation_of_transcription_from_RNA_polymerase_II_promoter_in_response_to_endoplasmic_reticulum_stress	11	0	0	1	1
GO:1990573_potassium_ion_import_across_plasma_membrane	43	2.33	3.28	0.268517	1	ATP1B2
GO:1990869_cellular_response_to_chemokine	16	0	0	1	1
GO:2000178_negative_regulation_of_neural_precursor_cell_proliferation	12	0	0	1	1
GO:2000249_regulation_of_actin_cytoskeleton_reorganization	19	0	0	1	1
GO:2000251_positive_regulation_of_actin_cytoskeleton_reorganization	19	0	0	1	1
GO:2000272_negative_regulation_of_signaling_receptor_activity	35	0	0	1	1
GO:2000300_regulation_of_synaptic_vesicle_exocytosis	50	0	0	1	1
GO:2000484_positive_regulation_of_interleukin-8_secretion	15	0	0	1	1
GO:2000649_regulation_of_sodium_ion_transmembrane_transporter_activity	18	0	0	1	1
GO:2000678_negative_regulation_of_transcription_regulatory_region_DNA_binding	13	0	0	1	1
GO:2000679_positive_regulation_of_transcription_regulatory_region_DNA_binding	16	0	0	1	1
GO:2001222_regulation_of_neuron_migration	14	0	0	1	1
GO:2001223_negative_regulation_of_neuron_migration	12	0	0	1	1
GO:2001224_positive_regulation_of_neuron_migration	15	0	0	1	1
GO:2001235_positive_regulation_of_apoptotic_signaling_pathway	25	0	0	1	1
GO:2001238_positive_regulation_of_extrinsic_apoptotic_signaling_pathway	25	0	0	1	1
GO:2001240_negative_regulation_of_extrinsic_apoptotic_signaling_pathway_in_absence_of_ligand	36	0	0	1	1
GO:2001241_positive_regulation_of_extrinsic_apoptotic_signaling_pathway_in_absence_of_ligand	11	0	0	1	1
GO:2001243_negative_regulation_of_intrinsic_apoptotic_signaling_pathway	24	0	0	1	1
GO:2001244_positive_regulation_of_intrinsic_apoptotic_signaling_pathway	38	0	0	1	1

## Sheet: KEGG_ Unique in Tha - ORA_Tha_u
ORA_Tha_uniqueFromT4M-kegg_all
geneset	NGenes	pctDE	OR	pvalue	FDR	external_gene_name.DE
hsa04610_Complement_and_coagulation_cascades	85	5.88	8.77	0.000387602	0.0279073	PLAT;SERPINA1;C3;FGB;FGA
hsa03320_PPAR_signaling_pathway	77	5.19	7.65	0.00238704	0.0859333	HMGCS1;APOA2;APOA1;FABP1
hsa04152_AMPK_signaling_pathway	120	3.33	4.81	0.0114036	0.273686	HMGCR;PFKFB3;TBC1D1;HNF4A
hsa04060_Cytokine-cytokine_receptor_interaction	294	2.04	2.92	0.0205339	0.36961	TNFRSF19;IL1RAP;TGFBR2;TNFRSF11B;CXCL14;CCR7
hsa04350_TGF-beta_signaling_pathway	94	3.19	4.58	0.0309825	0.371789	SMAD7;RBL1;TGFBR2
hsa04390_Hippo_signaling_pathway	157	2.55	3.64	0.0275752	0.371789	SMAD7;TGFBR2;LEF1;AFP
hsa02010_ABC_transporters	45	4.44	6.43	0.042122	0.404091	ABCG1;ABCG4
hsa04066_HIF-1_signaling_pathway	109	2.75	3.93	0.044899	0.404091	PFKFB3;TF;HKDC1
hsa04261_Adrenergic_signaling_in_cardiomyocytes	150	2	2.83	0.095591	0.764728	TPM4;TPM1;ATP1B2
hsa04310_Wnt_signaling_pathway	160	1.88	2.65	0.110423	0.795048	SFRP1;LEF1;MMP7
hsa04010_MAPK_signaling_pathway	294	1.36	1.91	0.165226	0.849734	IL1RAP;MEF2C;TGFBR2;FGFR4
hsa04061_Viral_protein_interaction_with_cytokine_and_cytokine_receptor	100	2	2.82	0.163634	0.849734	CXCL14;CCR7
hsa04070_Phosphatidylinositol_signaling_system	97	2.06	2.91	0.156012	0.849734	MTMR4;SYNJ2
hsa04512_ECM-receptor_interaction	88	2.27	3.21	0.133605	0.849734	LAMA4;ITGB5
hsa04810_Regulation_of_actin_cytoskeleton	214	1.4	1.96	0.202729	0.973102	EZR;ITGB5;FGFR4
hsa03013_RNA_transport	184	0.54	0.75	0.738557	1	PABPC1
hsa03022_Basal_transcription_factors	45	0	0	1	1
hsa04012_ErbB_signaling_pathway	85	1.18	1.64	0.461291	1	HBEGF
hsa04014_Ras_signaling_pathway	232	0.43	0.59	0.81604	1	FGFR4
hsa04015_Rap1_signaling_pathway	210	0.48	0.65	0.783865	1	FGFR4
hsa04020_Calcium_signaling_pathway	201	0.5	0.68	0.769142	1	TPCN2
hsa04022_cGMP-PKG_signaling_pathway	167	1.2	1.67	0.34113	1	ATP1B2;MEF2C
hsa04024_cAMP_signaling_pathway	216	0.46	0.64	0.793158	1	ATP1B2
hsa04062_Chemokine_signaling_pathway	192	1.04	1.45	0.40568	1	CXCL14;CCR7
hsa04064_NF-kappa_B_signaling_pathway	104	0	0	1	1
hsa04068_FoxO_signaling_pathway	131	0.76	1.06	0.614866	1	TGFBR2
hsa04071_Sphingolipid_signaling_pathway	119	0	0	1	1
hsa04072_Phospholipase_D_signaling_pathway	148	0	0	1	1
hsa04080_Neuroactive_ligand-receptor_interaction	341	0.88	1.22	0.44934	1	CALCB;C3;GABRP
hsa04115_p53_signaling_pathway	73	0	0	1	1
hsa04130_SNARE_interactions_in_vesicular_transport	33	0	0	1	1
hsa04150_mTOR_signaling_pathway	155	0	0	1	1
hsa04151_PI3K-Akt_signaling_pathway	354	0.85	1.17	0.473654	1	LAMA4;ITGB5;FGFR4
hsa04330_Notch_signaling_pathway	53	0	0	1	1
hsa04340_Hedgehog_signaling_pathway	50	0	0	1	1
hsa04370_VEGF_signaling_pathway	59	0	0	1	1
hsa04371_Apelin_signaling_pathway	137	1.46	2.04	0.261207	1	PLAT;MEF2C
hsa04392_Hippo_signaling_pathway	29	0	0	1	1
hsa04620_Toll-like_receptor_signaling_pathway	104	0	0	1	1
hsa04621_NOD-like_receptor_signaling_pathway	180	0	0	1	1
hsa04622_RIG-I-like_receptor_signaling_pathway	70	0	0	1	1
hsa04625_C-type_lectin_receptor_signaling_pathway	104	0	0	1	1
hsa04630_JAK-STAT_signaling_pathway	162	0	0	1	1
hsa04657_IL-17_signaling_pathway	94	0	0	1	1
hsa04660_T_cell_receptor_signaling_pathway	104	0	0	1	1
hsa04662_B_cell_receptor_signaling_pathway	81	0	0	1	1
hsa04664_Fc_epsilon_RI_signaling_pathway	68	0	0	1	1
hsa04668_TNF_signaling_pathway	112	0	0	1	1
hsa04672_Intestinal_immune_network_for_IgA_production	47	0	0	1	1
hsa04721_Synaptic_vesicle_cycle	78	1.28	1.78	0.433095	1	SLC17A8
hsa04722_Neurotrophin_signaling_pathway	119	0	0	1	1
hsa04723_Retrograde_endocannabinoid_signaling	148	1.35	1.89	0.290668	1	SLC17A8;GABRP
hsa04724_Glutamatergic_synapse	114	0.88	1.21	0.563984	1	SLC17A8
hsa04725_Cholinergic_synapse	113	0	0	1	1
hsa04726_Serotonergic_synapse	113	0	0	1	1
hsa04727_GABAergic_synapse	89	1.12	1.56	0.476772	1	GABRP
hsa04728_Dopaminergic_synapse	132	0.76	1.05	0.617668	1	ARNTL
hsa04910_Insulin_signaling_pathway	137	0.73	1.01	0.631376	1	HKDC1
hsa04912_GnRH_signaling_pathway	93	1.08	1.49	0.49181	1	HBEGF
hsa04915_Estrogen_signaling_pathway	137	0.73	1.01	0.631376	1	HBEGF
hsa04917_Prolactin_signaling_pathway	70	0	0	1	1
hsa04919_Thyroid_hormone_signaling_pathway	121	0.83	1.14	0.585699	1	ATP1B2
hsa04920_Adipocytokine_signaling_pathway	69	0	0	1	1
hsa04921_Oxytocin_signaling_pathway	154	0.65	0.9	0.674429	1	MEF2C
hsa04922_Glucagon_signaling_pathway	107	0	0	1	1
hsa04926_Relaxin_signaling_pathway	129	0.78	1.07	0.609201	1	TGFBR2
hsa04933_AGE-RAGE_signaling_pathway_in_diabetic_complications	100	1	1.39	0.5171	1	TGFBR2
hsa04961_Endocrine_and_other_factor-regulated_calcium_reabsorption	53	1.89	2.65	0.31987	1	ATP1B2
hsa05120_Epithelial_cell_signaling_in_Helicobacter_pylori_infection	70	1.43	1.99	0.399069	1	HBEGF
hsa05170_Human_immunodeficiency_virus_1_infection	212	0.94	1.31	0.455091	1	WEE1;CDC25C
hsa05320_Autoimmune_thyroid_disease	51	0	0	1	1
hsa05340_Primary_immunodeficiency	38	0	0	1	1

## Sheet: Unique in Th4M - ORA_T4M_unique
ORA_T4M_uniqueFromTha-go_all
geneset	NGenes	pctDE	OR	pvalue	FDR	external_gene_name.DE
GO:0010738_regulation_of_protein_kinase_A_signaling	11	36.36	27.49	5.12887e-05	0.013289	PJA2;PDE10A;AKAP1;AKAP5
GO:0019221_cytokine-mediated_signaling_pathway	279	6.09	3.17	7.1132e-05	0.013289	STAT3;STAT5B;IL6ST;TP53;KLF6;PTPRN;FOXO3;RELA;STX1A;BCL6;PIK3CB;JUNB;HMOX1;INPP5D;STAT6;IL13RA2;CXCL1
GO:0043491_protein_kinase_B_signaling	38	15.79	9.05	0.000113774	0.013289	SIRT2;ZFP36L1;ILK;TYRO3;EPHA2;KDR
GO:0045893_positive_regulation_of_transcription,_DNA-templated	565	4.6	2.37	0.000123047	0.013289	ILF3;STAT3;ID2;GPBP1;TP53INP2;ILK;TP53;CALCOCO1;KLF6;MMS19;DVL2;FOXO3;RELA;ING5;BMP7;CXXC1;USP21;HES5;MYCN;ACVR1;ANKRD49;MSANTD1;IRF1;KLF4;BCL3;TESC
GO:0045944_positive_regulation_of_transcription_by_RNA_polymerase_II	1133	3.97	2.06	1.99744e-05	0.013289	SSBP3;MEIS3;STAT3;RAF1;ID4;PATZ1;IRF2BP2;SIRT2;STAT5B;PRDM4;TP53;CALCOCO1;KLF6;XBP1;SRF;PTPRN;NFATC2IP;KAT2A;FOXO3;BMPR1A;RELA;BMP7;FOSL2;HES5;CRTC2;HYAL2;PER1;ADCYAP1;MYCN;NHLH1;NCOA7;KLF10;NR4A1;ETV6;ACVR1;PRRX1;LMO1;JUNB;NR4A3;AP001107.5;STAT6;IRF1;KLF4;BCL3;EGR3
GO:1901222_regulation_of_NIK/NF-kappaB_signaling	12	33.33	24.06	7.5687e-05	0.013289	BIRC2;RELA;UACA;BCL3
GO:1901998_toxin_transport	37	16.22	9.34	9.74845e-05	0.013289	ATP6V0A1;GGA1;CRTC2;DNAJC17;SLC7A8;CCT6B
GO:0000122_negative_regulation_of_transcription_by_RNA_polymerase_II	811	4.07	2.09	0.000165628	0.0156518	STAT3;ID2;ID4;EDNRB;MBD1;SIRT2;MXD4;TXNIP;TP53;HDAC7;FOXO3;RELA;PIAS3;ZNF692;CBX2;BTG2;CC2D1B;HES5;PER1;TGIF1;DNAJC17;PDE2A;BCL6;KLF10;ETV6;PRRX1;LMO1;MXD3;JUNB;NR4A3;STAT6;KLF4;EFNA1
GO:0045665_negative_regulation_of_neuron_differentiation	60	11.67	6.38	0.000220126	0.0166416	DDX6;ID2;ID4;DIXDC1;FOXO3;BMP7;HES5
GO:0045746_negative_regulation_of_Notch_signaling_pathway	42	14.29	8.04	0.000201725	0.0166416	BMP7;GDPD5;BCL6;DLK1;CHAC1;BEND6
GO:0051591_response_to_cAMP	44	13.64	7.62	0.000262225	0.018022	VGF;PTPRN;BIRC2;RELA;PER1;JUNB
GO:1902895_positive_regulation_of_pri-miRNA_transcription_by_RNA_polymerase_II	31	16.13	9.27	0.00038756	0.0244163	STAT3;TP53;SRF;BMPR1A;RELA
GO:0007165_signal_transduction	970	3.71	1.9	0.000487911	0.0263803	STAT3;RAF1;MAPK6;GPR173;TRAF4;MICAL1;CDK4;CAPN5;VGF;LMBR1L;HPCAL4;CALCOCO1;FNDC5;TYRO3;PXN;ADCY3;CRHBP;MAPK12;ARHGAP44;PIK3CB;INPP1;NR4A1;ARHGAP42;DDR2;STAC;GABRQ;GKAP1;AKAP5;EDNRA;INPP5D;GLRA1;RASGRF1;STAT6;PLAUR;DTHD1;CXCL1
GO:0014065_phosphatidylinositol_3-kinase_signaling	33	15.15	8.6	0.000523419	0.0263803	SIRT2;ZFP36L1;TYRO3;PIK3CB;PREX2
GO:0070059_intrinsic_apoptotic_signaling_pathway_in_response_to_endoplasmic_reticulum_stress	33	15.15	8.6	0.000523419	0.0263803	PPP1R15A;TP53;XBP1;CHAC1;ATP2A1
GO:0035556_intracellular_signal_transduction	374	4.81	2.47	0.000788717	0.0372669	MAPK6;SH2B1;SIK3;PASK;MAPK12;PSEN2;SOCS2;STAC;NUAK2;MAPK15;HMOX1;INPP5D;RGS14;SIK1B;ADRA1B;STAC2;SIK1;CXCL1
GO:0008277_regulation_of_G_protein-coupled_receptor_signaling_pathway	40	12.5	6.88	0.00129011	0.0464441	GNG4;ADCYAP1;RGS2;RGS5;RGS14
GO:0046902_regulation_of_mitochondrial_membrane_permeability	11	27.27	18.01	0.00124823	0.0464441	STAT3;SPG7;TP53
GO:0048711_positive_regulation_of_astrocyte_differentiation	11	27.27	18.01	0.00124823	0.0464441	ID2;BIN1;IL6ST
GO:0097150_neuronal_stem_cell_population_maintenance	23	17.39	10.13	0.00113219	0.0464441	SRRT;FOXO3;HES5;PRRX1
GO:1902475_L-alpha-amino_acid_transmembrane_transport	11	27.27	18.01	0.00124823	0.0464441	SLC3A2;SLC7A5;SLC7A8
GO:0007169_transmembrane_receptor_protein_tyrosine_kinase_signaling_pathway	106	7.55	3.95	0.00153752	0.0512575	SH2B1;EPHB3;TYRO3;EPHA2;PIK3CB;DDR2;BDNF;KDR
GO:0035023_regulation_of_Rho_protein_signal_transduction	84	8.33	4.39	0.00169502	0.0512575	RAF1;PLEKHG2;ARHGEF25;ARHGEF1;FGD3;PREX2;RASGRF1
GO:0060396_growth_hormone_receptor_signaling_pathway	12	25	16.02	0.00163908	0.0512575	STAT3;PXN;SOCS2
GO:2000178_negative_regulation_of_neural_precursor_cell_proliferation	12	25	16.02	0.00163908	0.0512575	ID2;ILK;BTG2
GO:0015804_neutral_amino_acid_transport	13	23.08	14.42	0.00209854	0.0610191	SLC7A5;SLC6A17;SLC7A8
GO:0022008_neurogenesis	45	11.11	6.02	0.00220296	0.061683	CXCR4;BTBD1;LEMD2;ETV6;CHAC1
GO:0007229_integrin-mediated_signaling_pathway	91	7.69	4.02	0.00268094	0.0672132	THY1;ILK;FUT8;PLP1;ITGA7;ADAM11;SEMA7A
GO:0032956_regulation_of_actin_cytoskeleton_organization	68	8.82	4.67	0.00269063	0.0672132	HIP1R;CORO2B;ILK;DIXDC1;CDK10;ARHGAP44
GO:0043951_negative_regulation_of_cAMP-mediated_signaling	14	21.43	13.1	0.00263047	0.0672132	PDE10A;PDE2A;RGS2
GO:0045880_positive_regulation_of_smoothened_signaling_pathway	29	13.79	7.7	0.00275609	0.0672132	ULK3;STK36;GAS8;PRRX1
GO:0007269_neurotransmitter_secretion	48	10.42	5.6	0.00293647	0.0672718	SNAP25;GAD1;TSPOAP1;STX1A;PPFIA4
GO:0031175_neuron_projection_development	117	6.84	3.55	0.00286243	0.0672718	CNTN1;SRF;PLP1;USP21;GDPD5;BTG2;ADCYAP1;RASGRF1
GO:0007411_axon_guidance	205	5.37	2.75	0.00351569	0.0781723	DRAXIN;CXCR4;EPHB3;SEMA4F;BMP7;IGSF9;EPHA2;PIK3CB;BDNF;NR4A3;EFNA1
GO:0006836_neurotransmitter_transport	16	18.75	11.09	0.00392555	0.084792	SV2C;ICA1;GABRQ
GO:0030330_DNA_damage_response,_signal_transduction_by_p53_class_mediator	17	17.65	10.29	0.00469487	0.0985922	TP53;FOXO3;BCL3
GO:0000226_microtubule_cytoskeleton_organization	103	6.8	3.52	0.00532734	0.10885	TUBA1B;TUBB4B;TACC2;SIK3;RNF19A;CUL9;TUBG2
GO:0010976_positive_regulation_of_neuron_projection_development	107	6.54	3.38	0.00654163	0.130144	SCARB2;CNTN1;ARSB;ADCYAP1;NCKIPSD;RGS2;BDNF
GO:0043524_negative_regulation_of_neuron_apoptotic_process	139	5.76	2.95	0.00802579	0.155577	DRAXIN;ILK;TYRO3;BTG2;RETREG1;BDNF;NR4A3;HMOX1
GO:0051898_negative_regulation_of_protein_kinase_B_signaling	62	8.06	4.22	0.00879169	0.166163	LEMD2;PHLPP1;HYAL2;EPHA2;KLF4
GO:0035024_negative_regulation_of_Rho_protein_signal_transduction	22	13.64	7.58	0.00985708	0.181755	KCTD10;BCL6;ARHGAP42
GO:0007268_chemical_synaptic_transmission	238	4.62	2.34	0.0104095	0.18737	SNAP25;GAD1;CACNB3;PLP1;SV2C;GABRQ;AKAP5;GLRA1;NPTX1;SST;UTS2
GO:0009967_positive_regulation_of_signal_transduction	65	7.69	4.01	0.0106784	0.187742	SH2B1;ILK;MMS19;SOCS2;RGS14
GO:0007204_positive_regulation_of_cytosolic_calcium_ion_concentration	149	5.37	2.74	0.0119114	0.20466	EDNRB;CXCR4;TRPM4;ADCYAP1;PLA2G6;EDNRA;ADRA1B;CCKBR
GO:0030036_actin_cytoskeleton_organization	150	5.33	2.72	0.0123647	0.207726	CYTH2;CORO2B;SRF;FGD3;BCL6;NUAK2;INF2;CXCL1
GO:0007267_cell-cell_signaling	216	4.63	2.35	0.0140481	0.226326	THY1;SEMA4F;GAL3ST4;ADCYAP1;KLF10;PCSK1;SST;EFNA1;ADRA1B;GPR50
GO:0071353_cellular_response_to_interleukin-4	25	12	6.55	0.0140705	0.226326	TUBA1B;CDK4;XBP1
GO:0001755_neural_crest_cell_migration	47	8.51	4.47	0.0155133	0.244334	EDNRB;SEMA4F;SEMA7A;ACVR1
GO:0006351_transcription,_DNA-templated	103	5.83	2.98	0.0194003	0.248716	GPBP1;PPP5C;PDE10A;MMS19;POLR2H;BCL3
GO:0006390_mitochondrial_transcription	11	18.18	10.66	0.0203877	0.248716	FOXO3;SLC25A33
GO:0006816_calcium_ion_transport	73	6.85	3.54	0.0170173	0.248716	SLC3A2;CACNB3;PSEN2;TRPC4;ATP2A1
GO:0007179_transforming_growth_factor_beta_receptor_signaling_pathway	103	5.83	2.98	0.0194003	0.248716	TP53;FUT8;BMPR1A;PXN;ACVR1;DUSP15
GO:0007218_neuropeptide_signaling_pathway	103	5.83	2.98	0.0194003	0.248716	TYRO3;NXPH2;ADCYAP1;ECEL1;GLRA1;APLF
GO:0015695_organic_cation_transport	11	18.18	10.66	0.0203877	0.248716	SLC7A8;SLC47A1
GO:0016081_synaptic_vesicle_docking	11	18.18	10.66	0.0203877	0.248716	SNAP25;STX1A
GO:0021915_neural_tube_development	28	10.71	5.76	0.0191578	0.248716	ZFP36L1;HES5;EPHA2
GO:0032481_positive_regulation_of_type_I_interferon_production	51	7.84	4.09	0.0203973	0.248716	RELA;POLR2H;STAT6;IRF1
GO:0034097_response_to_cytokine	48	8.33	4.37	0.0166566	0.248716	IL6ST;SRF;RELA;JUNB
GO:0060070_canonical_Wnt_signaling_pathway	74	6.76	3.49	0.0179526	0.248716	DIXDC1;DVL2;PYGO2;SFRP4;KLF4
GO:0070106_interleukin-27-mediated_signaling_pathway	11	18.18	10.66	0.0203877	0.248716	STAT3;IL6ST
GO:0070373_negative_regulation_of_ERK1_and_ERK2_cascade	74	6.76	3.49	0.0179526	0.248716	DUSP4;VRK3;SPRY4;RGS14;KLF4
GO:0070757_interleukin-35-mediated_signaling_pathway	11	18.18	10.66	0.0203877	0.248716	STAT3;IL6ST
GO:0021895_cerebral_cortex_neuron_differentiation	12	16.67	9.59	0.0241374	0.249971	ID4;GDPD5
GO:0038111_interleukin-7-mediated_signaling_pathway	30	10	5.33	0.0230416	0.249971	STAT3;STAT5B;SOCS2
GO:0042771_intrinsic_apoptotic_signaling_pathway_in_response_to_DNA_damage_by_p53_class_mediator	29	10.34	5.54	0.0210503	0.249971	TP53;RPS27L;BCL3
GO:0045744_negative_regulation_of_G_protein-coupled_receptor_signaling_pathway	12	16.67	9.59	0.0241374	0.249971	RGS2;RGS14
GO:0048008_platelet-derived_growth_factor_receptor_signaling_pathway	30	10	5.33	0.0230416	0.249971	TXNIP;NR4A3;RGS14
GO:0050884_neuromuscular_process_controlling_posture	12	16.67	9.59	0.0241374	0.249971	GCH1;GLRA1
GO:0071320_cellular_response_to_cAMP	52	7.69	4.01	0.0217497	0.249971	ZFP36L1;CRHBP;PDE2A;SLC26A6
GO:0072659_protein_localization_to_plasma_membrane	138	5.07	2.57	0.0238396	0.249971	ATP1B1;CACNB3;PPIL2;ZDHHC22;TTC7A;EPHA2;TESC
GO:1903078_positive_regulation_of_protein_localization_to_plasma_membrane	52	7.69	4.01	0.0217497	0.249971	EPHA2;STAC;AKAP5;STAC2
GO:1903507_negative_regulation_of_nucleic_acid-templated_transcription	53	7.55	3.92	0.0231555	0.249971	TRIM22;SIAH2;TONSL;BEND6
GO:2001223_negative_regulation_of_neuron_migration	12	16.67	9.59	0.0241374	0.249971	STAT3;GPR173
GO:0007010_cytoskeleton_organization	140	5	2.54	0.0255368	0.259478	BIN1;MICAL1;THY1;FGD3;NCKIPSD;PAK6;PLD2
GO:0007017_microtubule-based_process	32	9.38	4.97	0.02732	0.259478	TUBA1B;TUBB4B;TUBG2
GO:0009303_rRNA_transcription	13	15.38	8.72	0.0281445	0.259478	MARS;TP53
GO:0016064_immunoglobulin_mediated_immune_response	13	15.38	8.72	0.0281445	0.259478	INPP5D;IL13RA2
GO:0021675_nerve_development	13	15.38	8.72	0.0281445	0.259478	ILK;BDNF
GO:0021954_central_nervous_system_neuron_development	13	15.38	8.72	0.0281445	0.259478	GBA2;BTG2
GO:0031629_synaptic_vesicle_fusion_to_presynaptic_active_zone_membrane	13	15.38	8.72	0.0281445	0.259478	SNAP25;STX1A
GO:0035723_interleukin-15-mediated_signaling_pathway	13	15.38	8.72	0.0281445	0.259478	STAT3;STAT5B
GO:1902894_negative_regulation_of_pri-miRNA_transcription_by_RNA_polymerase_II	13	15.38	8.72	0.0281445	0.259478	SRF;RELA
GO:0030513_positive_regulation_of_BMP_signaling_pathway	33	9.09	4.8	0.0296068	0.260264	UBE2O;ILK;HES5
GO:0045666_positive_regulation_of_neuron_differentiation	84	5.95	3.04	0.0292025	0.260264	CYB5D2;GDPD5;SOCS2;BCL6;BEND6
GO:0090263_positive_regulation_of_canonical_Wnt_signaling_pathway	144	4.86	2.46	0.0291752	0.260264	RNF220;ILK;JRK;TRPM4;CSNK1G1;RSPO3;SFRP4
GO:1901223_negative_regulation_of_NIK/NF-kappaB_signaling	33	9.09	4.8	0.0296068	0.260264	HDAC7;RELA;BMP7
GO:0006978_DNA_damage_response,_signal_transduction_by_p53_class_mediator_resulting_in_transcription_of_p21_class_mediator	14	14.29	7.99	0.0323968	0.263286	TP53;RPS27L
GO:0007193_adenylate_cyclase-inhibiting_G_protein-coupled_receptor_signaling_pathway	59	6.78	3.49	0.0327367	0.263286	ADCY3;PDE2A;AKAP5;EDNRA
GO:0016446_somatic_hypermutation_of_immunoglobulin_genes	14	14.29	7.99	0.0323968	0.263286	MSH6;POLM
GO:0030522_intracellular_receptor_signaling_pathway	34	8.82	4.65	0.0319915	0.263286	STAT3;NR4A1;NR4A3
GO:0043123_positive_regulation_of_I-kappaB_kinase/NF-kappaB_signaling	179	4.47	2.25	0.0316974	0.263286	SLC44A2;PPP5C;BIRC2;RELA;IFIT5;TRIM22;HMOX1;LURAP1L
GO:0045773_positive_regulation_of_axon_extension	34	8.82	4.65	0.0319915	0.263286	ILK;SRF;SEMA7A
GO:1904263_positive_regulation_of_TORC1_signaling	14	14.29	7.99	0.0323968	0.263286	SIK3;KLHL22
GO:2001237_negative_regulation_of_extrinsic_apoptotic_signaling_pathway	34	8.82	4.65	0.0319915	0.263286	RELA;SIAH2;ACVR1
GO:0001963_synaptic_transmission,_dopaminergic	15	13.33	7.38	0.0368827	0.288768	CRHBP;TH
GO:0016082_synaptic_vesicle_priming	15	13.33	7.38	0.0368827	0.288768	SNAP25;VAMP1
GO:0034220_ion_transmembrane_transport	254	3.94	1.98	0.0374329	0.288768	ATP6V0A1;ATP1B1;RAF1;SFXN5;ABCD4;ABCC10;TMEM63C;GABRQ;GLRA1;ATP2A1
GO:0046627_negative_regulation_of_insulin_receptor_signaling_pathway	36	8.33	4.36	0.0370522	0.288768	RELA;SOCS2;PTPRE
GO:0006865_amino_acid_transport	37	8.11	4.24	0.0397269	0.300335	SLC3A2;SFXN5;SLC7A8
GO:0030030_cell_projection_organization	37	8.11	4.24	0.0397269	0.300335	CDK10;WRAP73;KIF17
GO:0030517_negative_regulation_of_axon_extension	16	12.5	6.85	0.0415909	0.302334	DRAXIN;TRIM46
GO:0045956_positive_regulation_of_calcium_ion-dependent_exocytosis	16	12.5	6.85	0.0415909	0.302334	SYT4;STX1A
GO:0048490_anterograde_synaptic_vesicle_transport	16	12.5	6.85	0.0415909	0.302334	AP3M2;TRIM46
GO:0070102_interleukin-6-mediated_signaling_pathway	16	12.5	6.85	0.0415909	0.302334	STAT3;IL6ST
GO:0031293_membrane_protein_intracellular_domain_proteolysis	17	11.76	6.39	0.0465103	0.328615	RELA;PSEN2
GO:0032012_regulation_of_ARF_protein_signal_transduction	17	11.76	6.39	0.0465103	0.328615	CYTH2;PSD2
GO:0060122_inner_ear_receptor_cell_stereocilium_organization	17	11.76	6.39	0.0465103	0.328615	HES5;WHRN
GO:0006366_transcription_by_RNA_polymerase_II	267	3.75	1.88	0.0495069	0.346548	MBD1;PRDM4;XBP1;SRF;DVL2;TAF1C;RPAP1;POLR2H;IRF1;KLF4
GO:0002028_regulation_of_sodium_ion_transport	18	11.11	5.99	0.0516305	0.354842	PER1;SIK1
GO:0009968_negative_regulation_of_signal_transduction	41	7.32	3.79	0.0513675	0.354842	ACVR1;RGS5;INPP5D
GO:0015701_bicarbonate_transport	42	7.14	3.69	0.0545079	0.367927	SLC26A6;CA13;CA3
GO:0031290_retinal_ganglion_cell_axon_guidance	19	10.53	5.64	0.0569411	0.367927	EPHB3;SEMA4F
GO:0042789_mRNA_transcription_by_RNA_polymerase_II	19	10.53	5.64	0.0569411	0.367927	STAT3;SRF
GO:0042795_snRNA_transcription_by_RNA_polymerase_II	70	5.71	2.91	0.0555051	0.367927	SRRT;INTS3;POLR2H;INTS9
GO:0060333_interferon-gamma-mediated_signaling_pathway	70	5.71	2.91	0.0555051	0.367927	TP53;TRIM26;TRIM22;IRF1
GO:0061024_membrane_organization	132	4.55	2.29	0.0547131	0.367927	SCARB2;BIN1;HIP1R;EPS15;DVL2;FCHO1
GO:1902236_negative_regulation_of_endoplasmic_reticulum_stress-induced_intrinsic_apoptotic_signaling_pathway	19	10.53	5.64	0.0569411	0.367927	XBP1;HERPUD1
GO:0038096_Fc-gamma_receptor_signaling_pathway_involved_in_phagocytosis	71	5.63	2.87	0.0579087	0.371008	NCKIPSD;PIK3CB;PLA2G6;PLD2
GO:0014032_neural_crest_cell_development	20	10	5.33	0.0624323	0.386875	BMPR1A;EDNRA
GO:0035567_non-canonical_Wnt_signaling_pathway	20	10	5.33	0.0624323	0.386875	DVL2;SFRP4
GO:0048011_neurotrophin_TRK_receptor_signaling_pathway	20	10	5.33	0.0624323	0.386875	RAF1;BDNF
GO:0050770_regulation_of_axonogenesis	20	10	5.33	0.0624323	0.386875	EPHB3;EFNA1
GO:0008630_intrinsic_apoptotic_signaling_pathway_in_response_to_DNA_damage	45	6.67	3.43	0.0644622	0.396207	MSH6;EPHA2;HMOX1
GO:0045088_regulation_of_innate_immune_response	21	9.52	5.05	0.0680943	0.411835	BIRC2;IRF1
GO:0045742_positive_regulation_of_epidermal_growth_factor_receptor_signaling_pathway	21	9.52	5.05	0.0680943	0.411835	HIP1R;PLAUR
GO:0006913_nucleocytoplasmic_transport	22	9.09	4.79	0.0739181	0.429862	AAAS;RGS14
GO:0009966_regulation_of_signal_transduction	22	9.09	4.79	0.0739181	0.429862	TSPYL2;SOCS2
GO:0035584_calcium-mediated_signaling_using_intracellular_calcium_source	22	9.09	4.79	0.0739181	0.429862	AZU1;KDR
GO:0045664_regulation_of_neuron_differentiation	22	9.09	4.79	0.0739181	0.429862	BIN1;BDNF
GO:1903861_positive_regulation_of_dendrite_extension	22	9.09	4.79	0.0739181	0.429862	SYT4;CXCR4
GO:0048167_regulation_of_synaptic_plasticity	48	6.25	3.2	0.0751871	0.433904	KAT2A;AP001107.5;RASGRF1
GO:0006851_mitochondrial_calcium_ion_transmembrane_transport	23	8.7	4.57	0.0798945	0.437683	SPG7;PMPCA
GO:0019934_cGMP-mediated_signaling	23	8.7	4.57	0.0798945	0.437683	EDNRB;PDE2A
GO:0023014_signal_transduction_by_protein_phosphorylation	49	6.12	3.13	0.0789263	0.437683	SLK;PAK6;MAP3K19
GO:0030833_regulation_of_actin_filament_polymerization	23	8.7	4.57	0.0798945	0.437683	PLEKHG2;GBA2
GO:0045892_negative_regulation_of_transcription,_DNA-templated	528	3.03	1.51	0.0789697	0.437683	ILF3;ID2;ID4;PATZ1;MBD1;SIRT2;TP53;RELA;BMP7;PER1;MAGEL2;BCL6;KLF10;IRF1;KLF4;BCL3
GO:0051091_positive_regulation_of_DNA-binding_transcription_factor_activity	111	4.5	2.27	0.0782861	0.437683	TRIM26;SRF;DVL2;TRIM22;DDR2
GO:0070509_calcium_ion_import	23	8.7	4.57	0.0798945	0.437683	TRPC4;ATP2A1
GO:0031098_stress-activated_protein_kinase_signaling_cascade	50	6	3.06	0.0827452	0.450038	SLK;PAK6;MAP3K19
GO:2001243_negative_regulation_of_intrinsic_apoptotic_signaling_pathway	24	8.33	4.36	0.0860149	0.46448	HERPUD1;PLAUR
GO:0007264_small_GTPase_mediated_signal_transduction	82	4.88	2.46	0.0878914	0.471247	SIAH2;PLD2;HMOX1;RASGRF1
GO:0043401_steroid_hormone_mediated_signaling_pathway	52	5.77	2.94	0.0906149	0.482429	BMP7;NR4A1;NR4A3
GO:0016079_synaptic_vesicle_exocytosis	25	8	4.17	0.0922709	0.484422	SNAP25;STX1A
GO:0043409_negative_regulation_of_MAPK_cascade	25	8	4.17	0.0922709	0.484422	LEMD2;EFNA1
GO:0000165_MAPK_cascade	263	3.42	1.71	0.0931776	0.485809	RAF1;MAPK6;PPP5C;ZFP36L1;ILK;MAPK12;MAPK15;RASGRF1;DUSP5
GO:0048013_ephrin_receptor_signaling_pathway	85	4.71	2.37	0.0971496	0.500556	EPHB3;PSEN2;EPHA2;EFNA1
GO:0048843_negative_regulation_of_axon_extension_involved_in_axon_guidance	26	7.69	3.99	0.0986545	0.500556	SEMA4F;SEMA7A
GO:0097193_intrinsic_apoptotic_signaling_pathway	26	7.69	3.99	0.0986545	0.500556	MSH6;TP53
GO:2000463_positive_regulation_of_excitatory_postsynaptic_potential	26	7.69	3.99	0.0986545	0.500556	CACNB3;STX1A
GO:0001816_cytokine_production	27	7.41	3.83	0.105158	0.512898	NFATC2IP;KAT2A
GO:0019933_cAMP-mediated_signaling	27	7.41	3.83	0.105158	0.512898	ADCYAP1;PDE2A
GO:0035329_hippo_signaling	27	7.41	3.83	0.105158	0.512898	PJA2;DVL2
GO:0051090_regulation_of_DNA-binding_transcription_factor_activity	27	7.41	3.83	0.105158	0.512898	STK36;HMOX1
GO:0070371_ERK1_and_ERK2_cascade	27	7.41	3.83	0.105158	0.512898	ZFP36L1;KDR
GO:2001234_negative_regulation_of_apoptotic_signaling_pathway	27	7.41	3.83	0.105158	0.512898	MEIS3;BDNF
GO:0055085_transmembrane_transport	272	3.31	1.65	0.108606	0.526319	SLC44A2;SV2C;ABCD4;ABCC10;SLC6A17;CNNM3;AQP4;SLC16A6;SLC47A1
GO:0007200_phospholipase_C-activating_G_protein-coupled_receptor_signaling_pathway	57	5.26	2.66	0.111564	0.534813	EDNRB;ADRA1B;CCKBR
GO:0050769_positive_regulation_of_neurogenesis	28	7.14	3.69	0.111773	0.534813	SRRT;RGS14
GO:0001578_microtubule_bundle_formation	29	6.9	3.55	0.118493	0.552969	TRIM46;AAAS
GO:0006362_transcription_elongation_from_RNA_polymerase_I_promoter	29	6.9	3.55	0.118493	0.552969	TAF1C;POLR2H
GO:0006906_vesicle_fusion	29	6.9	3.55	0.118493	0.552969	SNAP25;STX1A
GO:0043001_Golgi_to_plasma_membrane_protein_transport	29	6.9	3.55	0.118493	0.552969	GGA1;GGA3
GO:0043408_regulation_of_MAPK_cascade	59	5.08	2.57	0.120416	0.558496	PHLPP1;BMP7;PAK6
GO:0006363_termination_of_RNA_polymerase_I_transcription	30	6.67	3.42	0.125311	0.567277	TAF1C;POLR2H
GO:0048812_neuron_projection_morphogenesis	60	5	2.52	0.124937	0.567277	ILK;BMP7;BDNF
GO:0050852_T_cell_receptor_signaling_pathway	165	3.64	1.81	0.124252	0.567277	CD276;CACNB3;THY1;RELA;PIK3CB;INPP5D
GO:2000310_regulation_of_NMDA_receptor_activity	30	6.67	3.42	0.125311	0.567277	CRHBP;RASGRF1
GO:0006361_transcription_initiation_from_RNA_polymerase_I_promoter	31	6.45	3.31	0.13222	0.584553	TAF1C;POLR2H
GO:0007186_G_protein-coupled_receptor_signaling_pathway	1091	2.57	1.27	0.131921	0.584553	GNG4;EDNRB;GPR173;PLEKHG2;CXCR4;PDE10A;GPR162;ADCY3;TMEM145;ARHGEF25;ADCYAP1;ARHGEF1;FGD3;PDE2A;PIK3CB;PREX2;RGS2;RGS5;GPRC5C;EDNRA;SST;RGS14;APLF;ADRA1B;GPR50;CCKBR;UTS2;CXCL1
GO:0070507_regulation_of_microtubule_cytoskeleton_organization	31	6.45	3.31	0.13222	0.584553	DIXDC1;RASSF1
GO:1901796_regulation_of_signal_transduction_by_p53_class_mediator	131	3.82	1.91	0.132189	0.584553	TP53;TOP3A;ING5;RAD9A;ATRIP
GO:0006821_chloride_transport	32	6.25	3.2	0.139214	0.601403	SLC26A6;GLRA1
GO:0008089_anterograde_axonal_transport	32	6.25	3.2	0.139214	0.601403	SPG7;AP3M2
GO:0051965_positive_regulation_of_synapse_assembly	63	4.76	2.4	0.138853	0.601403	LRRN3;EPHB3;BDNF
GO:2000778_positive_regulation_of_interleukin-6_secretion	32	6.25	3.2	0.139214	0.601403	XBP1;HYAL2
GO:0006811_ion_transport	98	4.08	2.04	0.142067	0.609915	CNNM3;SLC26A6;CLDN15;GLRA1
GO:0007249_I-kappaB_kinase/NF-kappaB_signaling	64	4.69	2.36	0.143604	0.609915	BIRC2;RELA;BCL3
GO:0048010_vascular_endothelial_growth_factor_receptor_signaling_pathway	64	4.69	2.36	0.143604	0.609915	PXN;PIK3CB;KDR
GO:0003333_amino_acid_transmembrane_transport	33	6.06	3.09	0.146285	0.617829	SLC7A5;SLC7A8
GO:0071526_semaphorin-plexin_signaling_pathway	34	5.88	3	0.153428	0.644399	SEMA4F;SEMA7A
GO:0016358_dendrite_development	35	5.71	2.9	0.160638	0.662282	BMP7;IGSF9
GO:0032007_negative_regulation_of_TOR_signaling	35	5.71	2.9	0.160638	0.662282	SIK1B;SIK1
GO:0043410_positive_regulation_of_MAPK_cascade	103	3.88	1.94	0.16119	0.662282	CDK10;KDR;EFNA1;ADRA1B
GO:1990090_cellular_response_to_nerve_growth_factor_stimulus	35	5.71	2.9	0.160638	0.662282	KAT2A;FOXO3
GO:0030177_positive_regulation_of_Wnt_signaling_pathway	36	5.56	2.82	0.167907	0.682463	DIXDC1;RSPO3
GO:1902042_negative_regulation_of_extrinsic_apoptotic_signaling_pathway_via_death_domain_receptors	36	5.56	2.82	0.167907	0.682463	RAF1;HMOX1
GO:0070555_response_to_interleukin-1	37	5.41	2.74	0.175232	0.708425	MTHFR;RELA
GO:0007265_Ras_protein_signal_transduction	72	4.17	2.08	0.183372	0.733489	TP53;RASSF1;DOK3
GO:2001244_positive_regulation_of_intrinsic_apoptotic_signaling_pathway	38	5.26	2.66	0.182606	0.733489	TP53;BMF
GO:0006283_transcription-coupled_nucleotide-excision_repair	73	4.11	2.05	0.188536	0.742362	COPS7B;POLR2H;XRCC1
GO:0015031_protein_transport	310	2.9	1.44	0.18796	0.742362	EXOC7;SNX4;EXOC3;ARRDC4;XBP1;ZMAT3;ATG9A;RHBDF1;TESC
GO:0043433_negative_regulation_of_DNA-binding_transcription_factor_activity	73	4.11	2.05	0.188536	0.742362	ID2;HMOX1;SFRP4
GO:0007219_Notch_signaling_pathway	111	3.6	1.79	0.193562	0.751104	DTX3;CNTN1;HES5;CHAC1
GO:0031113_regulation_of_microtubule_polymerization	11	9.09	4.79	0.203672	0.751104	GBA2
GO:0038110_interleukin-2-mediated_signaling_pathway	11	9.09	4.79	0.203672	0.751104	STAT5B
GO:0042136_neurotransmitter_biosynthetic_process	11	9.09	4.79	0.203672	0.751104	TH
GO:0042994_cytoplasmic_sequestering_of_transcription_factor	11	9.09	4.79	0.203672	0.751104	TONSL
GO:0045010_actin_nucleation	11	9.09	4.79	0.203672	0.751104	GSN
GO:0045080_positive_regulation_of_chemokine_biosynthetic_process	11	9.09	4.79	0.203672	0.751104	HMOX1
GO:0048681_negative_regulation_of_axon_regeneration	11	9.09	4.79	0.203672	0.751104	RTN4RL1
GO:0051024_positive_regulation_of_immunoglobulin_secretion	11	9.09	4.79	0.203672	0.751104	XBP1
GO:0051561_positive_regulation_of_mitochondrial_calcium_ion_concentration	11	9.09	4.79	0.203672	0.751104	ATP2A1
GO:0060088_auditory_receptor_cell_stereocilium_organization	11	9.09	4.79	0.203672	0.751104	WHRN
GO:0098911_regulation_of_ventricular_cardiac_muscle_cell_action_potential	11	9.09	4.79	0.203672	0.751104	TRPM4
GO:1990440_positive_regulation_of_transcription_from_RNA_polymerase_II_promoter_in_response_to_endoplasmic_reticulum_stress	11	9.09	4.79	0.203672	0.751104	TP53
GO:0001843_neural_tube_closure	77	3.9	1.94	0.209545	0.756813	MTHFR;DVL2;KAT2A
GO:0007018_microtubule-based_movement	79	3.8	1.89	0.220237	0.756813	KIF17;WDR63;DNAH5
GO:0008272_sulfate_transport	12	8.33	4.35	0.219994	0.756813	SLC26A6
GO:0031122_cytoplasmic_microtubule_organization	43	4.65	2.34	0.220049	0.756813	SLK;TUBG2
GO:0033209_tumor_necrosis_factor-mediated_signaling_pathway	116	3.45	1.71	0.214738	0.756813	ILK;BIRC2;FOXO3;RELA
GO:0038180_nerve_growth_factor_signaling_pathway	12	8.33	4.35	0.219994	0.756813	BDNF
GO:0042147_retrograde_transport,_endosome_to_Golgi	77	3.9	1.94	0.209545	0.756813	UBE2O;GGA1;MAGEL2
GO:0046626_regulation_of_insulin_receptor_signaling_pathway	12	8.33	4.35	0.219994	0.756813	CDK4
GO:0048012_hepatocyte_growth_factor_receptor_signaling_pathway	12	8.33	4.35	0.219994	0.756813	SIRT2
GO:0060391_positive_regulation_of_SMAD_protein_signal_transduction	12	8.33	4.35	0.219994	0.756813	BMPR1A
GO:0060402_calcium_ion_transport_into_cytosol	12	8.33	4.35	0.219994	0.756813	CACNB3
GO:0070588_calcium_ion_transmembrane_transport	116	3.45	1.71	0.214738	0.756813	TRPM4;PDE2A;TRPC4;ATP2A1
GO:0090179_planar_cell_polarity_pathway_involved_in_neural_tube_closure	12	8.33	4.35	0.219994	0.756813	DVL2
GO:0098962_regulation_of_postsynaptic_neurotransmitter_receptor_activity	12	8.33	4.35	0.219994	0.756813	NPTX1
GO:1990573_potassium_ion_import_across_plasma_membrane	43	4.65	2.34	0.220049	0.756813	ATP1B1;KCNK9
GO:0001508_action_potential	16	6.25	3.19	0.282007	0.76142	GLRA1
GO:0001921_positive_regulation_of_receptor_recycling	15	6.67	3.42	0.266981	0.76142	EPS15
GO:0006612_protein_targeting_to_membrane	47	4.26	2.13	0.250424	0.76142	ZDHHC22;ZDHHC11B
GO:0006825_copper_ion_transport	14	7.14	3.68	0.251641	0.76142	FKBP4
GO:0006833_water_transport	15	6.67	3.42	0.266981	0.76142	AQP4
GO:0006895_Golgi_to_endosome_transport	15	6.67	3.42	0.266981	0.76142	EPS15
GO:0007342_fusion_of_sperm_to_egg_plasma_membrane_involved_in_single_fertilization	16	6.25	3.19	0.282007	0.76142	SPACA6
GO:0007405_neuroblast_proliferation	16	6.25	3.19	0.282007	0.76142	ID4
GO:0008593_regulation_of_Notch_signaling_pathway	16	6.25	3.19	0.282007	0.76142	IL6ST
GO:0010001_glial_cell_differentiation	14	7.14	3.68	0.251641	0.76142	PLP1
GO:0010248_establishment_or_maintenance_of_transmembrane_electrochemical_gradient	14	7.14	3.68	0.251641	0.76142	ATP1B1
GO:0010765_positive_regulation_of_sodium_ion_transport	16	6.25	3.19	0.282007	0.76142	CNTN1
GO:0014002_astrocyte_development	15	6.67	3.42	0.266981	0.76142	PLP1
GO:0014067_negative_regulation_of_phosphatidylinositol_3-kinase_signaling	16	6.25	3.19	0.282007	0.76142	KLF4
GO:0015718_monocarboxylic_acid_transport	13	7.69	3.99	0.235981	0.76142	SLC16A6
GO:0015918_sterol_transport	14	7.14	3.68	0.251641	0.76142	OSBPL7
GO:0016050_vesicle_organization	13	7.69	3.99	0.235981	0.76142	EPS15
GO:0019722_calcium-mediated_signaling	80	3.75	1.87	0.225624	0.76142	EDNRB;CXCR4;TRPM4
GO:0030509_BMP_signaling_pathway	86	3.49	1.73	0.25842	0.76142	BMPR1A;BMP7;ACVR1
GO:0030705_cytoskeleton-dependent_intracellular_transport	16	6.25	3.19	0.282007	0.76142	TUBA1B
GO:0030837_negative_regulation_of_actin_filament_polymerization	16	6.25	3.19	0.282007	0.76142	HIP1R
GO:0030970_retrograde_protein_transport,_ER_to_cytosol	16	6.25	3.19	0.282007	0.76142	HERPUD1
GO:0031103_axon_regeneration	16	6.25	3.19	0.282007	0.76142	RTN4RL1
GO:0031115_negative_regulation_of_microtubule_polymerization	13	7.69	3.99	0.235981	0.76142	FKBP4
GO:0032228_regulation_of_synaptic_transmission,_GABAergic	14	7.14	3.68	0.251641	0.76142	AP001107.5
GO:0032469_endoplasmic_reticulum_calcium_ion_homeostasis	15	6.67	3.42	0.266981	0.76142	HERPUD1
GO:0032703_negative_regulation_of_interleukin-2_production	15	6.67	3.42	0.266981	0.76142	HDAC7
GO:0036376_sodium_ion_export_across_plasma_membrane	13	7.69	3.99	0.235981	0.76142	ATP1B1
GO:0043124_negative_regulation_of_I-kappaB_kinase/NF-kappaB_signaling	48	4.17	2.08	0.258043	0.76142	MAPKBP1;PER1
GO:0043950_positive_regulation_of_cAMP-mediated_signaling	15	6.67	3.42	0.266981	0.76142	ADCYAP1
GO:0045078_positive_regulation_of_interferon-gamma_biosynthetic_process	13	7.69	3.99	0.235981	0.76142	CD276
GO:0045410_positive_regulation_of_interleukin-6_biosynthetic_process	15	6.67	3.42	0.266981	0.76142	STAT3
GO:0045747_positive_regulation_of_Notch_signaling_pathway	51	3.92	1.95	0.280905	0.76142	STAT3;HES5
GO:0045824_negative_regulation_of_innate_immune_response	15	6.67	3.42	0.266981	0.76142	TYRO3
GO:0046328_regulation_of_JNK_cascade	15	6.67	3.42	0.266981	0.76142	PHLPP1
GO:0046330_positive_regulation_of_JNK_cascade	80	3.75	1.87	0.225624	0.76142	PJA2;TRAF4;DUSP15
GO:0048015_phosphatidylinositol-mediated_signaling	50	4	2	0.273287	0.76142	GSN;PIK3CB
GO:0048168_regulation_of_neuronal_synaptic_plasticity	15	6.67	3.42	0.266981	0.76142	RASGRF1
GO:0048791_calcium_ion-regulated_exocytosis_of_neurotransmitter	14	7.14	3.68	0.251641	0.76142	SYT4
GO:0050777_negative_regulation_of_immune_response	13	7.69	3.99	0.235981	0.76142	INPP5D
GO:0050862_positive_regulation_of_T_cell_receptor_signaling_pathway	14	7.14	3.68	0.251641	0.76142	RELA
GO:0050885_neuromuscular_process_controlling_balance	45	4.44	2.23	0.235209	0.76142	IGDCC3;NR4A3
GO:0051016_barbed-end_actin_filament_capping	15	6.67	3.42	0.266981	0.76142	GSN
GO:0051693_actin_filament_capping	13	7.69	3.99	0.235981	0.76142	GSN
GO:0060291_long-term_synaptic_potentiation	47	4.26	2.13	0.250424	0.76142	SNAP25;RGS14
GO:0061564_axon_development	13	7.69	3.99	0.235981	0.76142	PLP1
GO:0070050_neuron_cellular_homeostasis	15	6.67	3.42	0.266981	0.76142	TYRO3
GO:0070528_protein_kinase_C_signaling	13	7.69	3.99	0.235981	0.76142	AZU1
GO:0070593_dendrite_self-avoidance	16	6.25	3.19	0.282007	0.76142	IGSF9
GO:0071277_cellular_response_to_calcium_ion	83	3.61	1.8	0.24193	0.76142	SYT4;CRHBP;JUNB
GO:0075733_intracellular_transport_of_virus	50	4	2	0.273287	0.76142	NUP210;AAAS
GO:0097320_plasma_membrane_tubulation	16	6.25	3.19	0.282007	0.76142	FCHO1
GO:0098719_sodium_ion_import_across_plasma_membrane	15	6.67	3.42	0.266981	0.76142	TRPM4
GO:0099509_regulation_of_presynaptic_cytosolic_calcium_ion_concentration	13	7.69	3.99	0.235981	0.76142	TSPOAP1
GO:1900006_positive_regulation_of_dendrite_development	14	7.14	3.68	0.251641	0.76142	BMP7
GO:1900271_regulation_of_long-term_synaptic_potentiation	14	7.14	3.68	0.251641	0.76142	CYP46A1
GO:1902358_sulfate_transmembrane_transport	16	6.25	3.19	0.282007	0.76142	SLC26A6
GO:1902476_chloride_transmembrane_transport	88	3.41	1.69	0.269495	0.76142	GABRQ;SLC26A6;GLRA1
GO:1903204_negative_regulation_of_oxidative_stress-induced_neuron_death	13	7.69	3.99	0.235981	0.76142	NCOA7
GO:2000484_positive_regulation_of_interleukin-8_secretion	15	6.67	3.42	0.266981	0.76142	HYAL2
GO:0006886_intracellular_protein_transport	307	2.61	1.28	0.295086	0.76301	SGSM2;AP3M2;GGA1;HID1;GGA3;STX1A;SEC24D;SGSM1
GO:0006955_immune_response	306	2.61	1.29	0.292111	0.76301	CD276;CXCR4;XBP1;BMPR1A;TRIM22;SEMA7A;ULBP2;CXCL1
GO:0007020_microtubule_nucleation	17	5.88	2.99	0.296726	0.76301	TUBG2
GO:0016192_vesicle-mediated_transport	134	2.99	1.47	0.29517	0.76301	SYT4;AP3M2;KXD1;KIF17
GO:0021522_spinal_cord_motor_neuron_differentiation	17	5.88	2.99	0.296726	0.76301	GDPD5
GO:0030322_stabilization_of_membrane_potential	17	5.88	2.99	0.296726	0.76301	KCNK9
GO:0032924_activin_receptor_signaling_pathway	17	5.88	2.99	0.296726	0.76301	ACVR1
GO:0034122_negative_regulation_of_toll-like_receptor_signaling_pathway	17	5.88	2.99	0.296726	0.76301	TYRO3
GO:0043525_positive_regulation_of_neuron_apoptotic_process	53	3.77	1.88	0.296118	0.76301	TP53;FOXO3
GO:0048666_neuron_development	53	3.77	1.88	0.296118	0.76301	XBP1;SRF
GO:0060292_long-term_synaptic_depression	17	5.88	2.99	0.296726	0.76301	SRF
GO:0090090_negative_regulation_of_canonical_Wnt_signaling_pathway	175	2.86	1.41	0.289644	0.76301	DRAXIN;DVL2;FOXO3;SIAH2;SFRP4
GO:1901215_negative_regulation_of_neuron_death	53	3.77	1.88	0.296118	0.76301	STAT3;PPP5C
GO:1902041_regulation_of_extrinsic_apoptotic_signaling_pathway_via_death_domain_receptors	17	5.88	2.99	0.296726	0.76301	FEM1B
GO:0006874_cellular_calcium_ion_homeostasis	94	3.19	1.58	0.302988	0.773848	ATP1B1;PIK3CB;ATP2A1
GO:0071346_cellular_response_to_interferon-gamma	94	3.19	1.58	0.302988	0.773848	GSN;AQP4;SLC26A6
GO:0006898_receptor-mediated_endocytosis	95	3.16	1.56	0.308595	0.776667	SCARB2;HIP1R;LMBR1L
GO:0007041_lysosomal_transport	18	5.56	2.82	0.311143	0.776667	ARSB
GO:0017158_regulation_of_calcium_ion-dependent_exocytosis	18	5.56	2.82	0.311143	0.776667	SYT4
GO:0035082_axoneme_assembly	18	5.56	2.82	0.311143	0.776667	GAS8
GO:0042462_eye_photoreceptor_cell_development	18	5.56	2.82	0.311143	0.776667	TH
GO:0071345_cellular_response_to_cytokine_stimulus	55	3.64	1.81	0.311283	0.776667	STAT3;CXCR4
GO:0097711_ciliary_basal_body-plasma_membrane_docking	95	3.16	1.56	0.308595	0.776667	TUBB4B;SFI1;CEP72
GO:0006977_DNA_damage_response,_signal_transduction_by_p53_class_mediator_resulting_in_cell_cycle_arrest	56	3.57	1.77	0.31884	0.788144	TP53;BTG2
GO:0032793_positive_regulation_of_CREB_transcription_factor_activity	19	5.26	2.66	0.325266	0.788144	CRTC2
GO:0034314_Arp2/3_complex-mediated_actin_nucleation	19	5.26	2.66	0.325266	0.788144	MAGEL2
GO:0035458_cellular_response_to_interferon-beta	19	5.26	2.66	0.325266	0.788144	IRF1
GO:0048663_neuron_fate_commitment	19	5.26	2.66	0.325266	0.788144	ID2
GO:0071354_cellular_response_to_interleukin-6	19	5.26	2.66	0.325266	0.788144	RELA
GO:0071880_adenylate_cyclase-activating_adrenergic_receptor_signaling_pathway	19	5.26	2.66	0.325266	0.788144	ADRA1B
GO:0072657_protein_localization_to_membrane	19	5.26	2.66	0.325266	0.788144	STX1A
GO:0098655_cation_transmembrane_transport	19	5.26	2.66	0.325266	0.788144	SLC41A3
GO:0050804_modulation_of_chemical_synaptic_transmission	57	3.51	1.74	0.326378	0.788312	STAT3;BDNF
GO:0051056_regulation_of_small_GTPase_mediated_signal_transduction	141	2.84	1.4	0.327508	0.788522	PLEKHG2;ARHGEF1;ARHGAP44;FGD3
GO:0016055_Wnt_signaling_pathway	185	2.7	1.33	0.329656	0.791175	DRAXIN;CALCOCO1;TYRO3;CSNK1G1;RSPO3
GO:0002756_MyD88-independent_toll-like_receptor_signaling_pathway	20	5	2.52	0.339099	0.796146	BIRC2
GO:0006509_membrane_protein_ectodomain_proteolysis	20	5	2.52	0.339099	0.796146	PSEN2
GO:0007130_synaptonemal_complex_assembly	20	5	2.52	0.339099	0.796146	REC8
GO:0007189_adenylate_cyclase-activating_G_protein-coupled_receptor_signaling_pathway	100	3	1.48	0.336655	0.796146	ADCY3;ADCYAP1;GPR3
GO:0007413_axonal_fasciculation	20	5	2.52	0.339099	0.796146	EPHB3
GO:0040037_negative_regulation_of_fibroblast_growth_factor_receptor_signaling_pathway	20	5	2.52	0.339099	0.796146	SPRY4
GO:0050860_negative_regulation_of_T_cell_receptor_signaling_pathway	20	5	2.52	0.339099	0.796146	THY1
GO:0016338_calcium-independent_cell-cell_adhesion_via_plasma_membrane_cell-adhesion_molecules	21	4.76	2.39	0.352649	0.8178	CLDN15
GO:0050771_negative_regulation_of_axonogenesis	21	4.76	2.39	0.352649	0.8178	THY1
GO:0050775_positive_regulation_of_dendrite_morphogenesis	21	4.76	2.39	0.352649	0.8178	ILK
GO:0050807_regulation_of_synapse_organization	21	4.76	2.39	0.352649	0.8178	IGSF9
GO:0002092_positive_regulation_of_receptor_internalization	22	4.55	2.28	0.365922	0.820882	SFRP4
GO:0034341_response_to_interferon-gamma	22	4.55	2.28	0.365922	0.820882	GCH1
GO:0045022_early_endosome_to_late_endosome_transport	22	4.55	2.28	0.365922	0.820882	WDR91
GO:0045104_intermediate_filament_cytoskeleton_organization	22	4.55	2.28	0.365922	0.820882	RAF1
GO:0046628_positive_regulation_of_insulin_receptor_signaling_pathway	22	4.55	2.28	0.365922	0.820882	GKAP1
GO:0048260_positive_regulation_of_receptor-mediated_endocytosis	22	4.55	2.28	0.365922	0.820882	HIP1R
GO:0048278_vesicle_docking	22	4.55	2.28	0.365922	0.820882	STX1A
GO:0050768_negative_regulation_of_neurogenesis	22	4.55	2.28	0.365922	0.820882	BMPR1A
GO:0051899_membrane_depolarization	22	4.55	2.28	0.365922	0.820882	CACNB3
GO:0061640_cytoskeleton-dependent_cytokinesis	22	4.55	2.28	0.365922	0.820882	SEPT5
GO:1901224_positive_regulation_of_NIK/NF-kappaB_signaling	62	3.23	1.6	0.363686	0.820882	ILK;RELA
GO:0010977_negative_regulation_of_neuron_projection_development	63	3.17	1.57	0.371057	0.827491	FKBP4;RTN4RL1
GO:0060079_excitatory_postsynaptic_potential	63	3.17	1.57	0.371057	0.827491	AP001107.5;GLRA1
GO:0008643_carbohydrate_transport	23	4.35	2.18	0.378923	0.842547	SLC35A4
GO:0001764_neuron_migration	108	2.78	1.37	0.381361	0.845481	CXCR4;TRIM46;SRF
GO:0010608_posttranscriptional_regulation_of_gene_expression	24	4.17	2.08	0.391659	0.858243	PER1
GO:0045879_negative_regulation_of_smoothened_signaling_pathway	24	4.17	2.08	0.391659	0.858243	ULK3
GO:0072332_intrinsic_apoptotic_signaling_pathway_by_p53_class_mediator	24	4.17	2.08	0.391659	0.858243	TP53
GO:1904659_glucose_transmembrane_transport	24	4.17	2.08	0.391659	0.858243	SLC2A3
GO:0006357_regulation_of_transcription_by_RNA_polymerase_II	1146	2.18	1.07	0.402332	0.872927	BRD2;STAT3;ID4;VSX2;STAT5B;ZFP36L1;KLF6;KAT2A;CENPT;FOXO3;PIAS3;CXXC1;ZNF276;FOSL2;ELMSAN1;MYCN;NHLH1;KLF10;ETV6;JUNB;AP001107.5;ZNF823;STAT6;KLF4;EGR3
GO:0010975_regulation_of_neuron_projection_development	25	4	1.99	0.404133	0.872927	SNAP25
GO:0043113_receptor_clustering	25	4	1.99	0.404133	0.872927	THY1
GO:2001235_positive_regulation_of_apoptotic_signaling_pathway	25	4	1.99	0.404133	0.872927	ING5
GO:2001238_positive_regulation_of_extrinsic_apoptotic_signaling_pathway	25	4	1.99	0.404133	0.872927	HYAL2
GO:0022900_electron_transport_chain	69	2.9	1.43	0.414509	0.886654	GLDC;P4HA2
GO:0030111_regulation_of_Wnt_signaling_pathway	26	3.85	1.91	0.416352	0.886654	RSPO3
GO:0032728_positive_regulation_of_interferon-beta_production	26	3.85	1.91	0.416352	0.886654	IRF1
GO:0048675_axon_extension	26	3.85	1.91	0.416352	0.886654	SEMA7A
GO:1900740_positive_regulation_of_protein_insertion_into_mitochondrial_membrane_involved_in_apoptotic_signaling_pathway	26	3.85	1.91	0.416352	0.886654	TP53
GO:0006367_transcription_initiation_from_RNA_polymerase_II_promoter	161	2.48	1.22	0.420188	0.89231	CDK4;POLR2H;NR4A1;NR4A3
GO:0038061_NIK/NF-kappaB_signaling	70	2.86	1.41	0.421607	0.892816	BIRC2;RELA
GO:0046580_negative_regulation_of_Ras_protein_signal_transduction	27	3.7	1.84	0.428321	0.899475	SPRY4
GO:0050434_positive_regulation_of_viral_transcription	27	3.7	1.84	0.428321	0.899475	POLR2H
GO:0070372_regulation_of_ERK1_and_ERK2_cascade	27	3.7	1.84	0.428321	0.899475	EPHA2
GO:0001774_microglial_cell_activation	28	3.57	1.77	0.440045	0.91394	AZU1
GO:0007205_protein_kinase_C-activating_G_protein-coupled_receptor_signaling_pathway	28	3.57	1.77	0.440045	0.91394	AZU1
GO:0051881_regulation_of_mitochondrial_membrane_potential	28	3.57	1.77	0.440045	0.91394	SLC25A33
GO:0051924_regulation_of_calcium_ion_transport	28	3.57	1.77	0.440045	0.91394	CXCR4
GO:0007266_Rho_protein_signal_transduction	74	2.7	1.33	0.449545	0.917624	ARHGEF1;BCL6
GO:0007274_neuromuscular_synaptic_transmission	29	3.45	1.71	0.451529	0.917624	EGR3
GO:0010803_regulation_of_tumor_necrosis_factor-mediated_signaling_pathway	29	3.45	1.71	0.451529	0.917624	BIRC2
GO:0035666_TRIF-dependent_toll-like_receptor_signaling_pathway	29	3.45	1.71	0.451529	0.917624	BIRC2
GO:0046329_negative_regulation_of_JNK_cascade	29	3.45	1.71	0.451529	0.917624	PER1
GO:0046579_positive_regulation_of_Ras_protein_signal_transduction	29	3.45	1.71	0.451529	0.917624	RASGRF1
GO:0051281_positive_regulation_of_release_of_sequestered_calcium_ion_into_cytosol	29	3.45	1.71	0.451529	0.917624	THY1
GO:0051968_positive_regulation_of_synaptic_transmission,_glutamatergic	29	3.45	1.71	0.451529	0.917624	ADCYAP1
GO:0007528_neuromuscular_junction_development	30	3.33	1.65	0.462778	0.935455	CACNB3
GO:0090314_positive_regulation_of_protein_targeting_to_membrane	30	3.33	1.65	0.462778	0.935455	CACNB3
GO:0030512_negative_regulation_of_transforming_growth_factor_beta_receptor_signaling_pathway	77	2.6	1.28	0.46999	0.947499	TP53;VEPH1
GO:0002376_immune_system_process	31	3.23	1.59	0.473797	0.947593	IRF1
GO:0030041_actin_filament_polymerization	31	3.23	1.59	0.473797	0.947593	GSN
GO:0097192_extrinsic_apoptotic_signaling_pathway_in_absence_of_ligand	31	3.23	1.59	0.473797	0.947593	FOXO3
GO:0060078_regulation_of_postsynaptic_membrane_potential	32	3.12	1.54	0.48459	0.964079	ADCYAP1
GO:1900745_positive_regulation_of_p38MAPK_cascade	32	3.12	1.54	0.48459	0.964079	PJA2
GO:0006383_transcription_by_RNA_polymerase_III	33	3.03	1.49	0.495162	0.977395	POLR2H
GO:0008625_extrinsic_apoptotic_signaling_pathway_via_death_domain_receptors	33	3.03	1.49	0.495162	0.977395	DELE1
GO:0050767_regulation_of_neurogenesis	33	3.03	1.49	0.495162	0.977395	HES5
GO:0071347_cellular_response_to_interleukin-1	81	2.47	1.21	0.496529	0.977541	RELA;HYAL2
GO:0008286_insulin_receptor_signaling_pathway	82	2.44	1.2	0.50303	0.987769	ATP6V0A1;FOXO3
GO:0006369_termination_of_RNA_polymerase_II_transcription	34	2.94	1.45	0.505517	0.990081	CPSF4
GO:0006812_cation_transport	35	2.86	1.41	0.515661	0.997435	TMEM63C
GO:0032088_negative_regulation_of_NF-kappaB_transcription_factor_activity	84	2.38	1.17	0.515869	0.997435	BMP7;KLF4
GO:0042059_negative_regulation_of_epidermal_growth_factor_receptor_signaling_pathway	35	2.86	1.41	0.515661	0.997435	EPS15
GO:0048488_synaptic_vesicle_endocytosis	35	2.86	1.41	0.515661	0.997435	STX1A
GO:0048813_dendrite_morphogenesis	35	2.86	1.41	0.515661	0.997435	PREX2
GO:0000083_regulation_of_transcription_involved_in_G1/S_transition_of_mitotic_cell_cycle	23	0	0	1	1
GO:0000281_mitotic_cytokinesis	52	0	0	1	1
GO:0001771_immunological_synapse_formation	11	0	0	1	1
GO:0001778_plasma_membrane_repair	11	0	0	1	1
GO:0001817_regulation_of_cytokine_production	11	0	0	1	1
GO:0001818_negative_regulation_of_cytokine_production	14	0	0	1	1
GO:0001819_positive_regulation_of_cytokine_production	24	0	0	1	1
GO:0001881_receptor_recycling	11	0	0	1	1
GO:0002031_G_protein-coupled_receptor_internalization	13	0	0	1	1
GO:0002052_positive_regulation_of_neuroblast_proliferation	22	0	0	1	1
GO:0002091_negative_regulation_of_receptor_internalization	12	0	0	1	1
GO:0002218_activation_of_innate_immune_response	24	0	0	1	1
GO:0002223_stimulatory_C-type_lectin_receptor_signaling_pathway	112	1.79	0.87	0.671615	1	RAF1;RELA
GO:0002224_toll-like_receptor_signaling_pathway	43	0	0	1	1
GO:0002227_innate_immune_response_in_mucosa	24	0	0	1	1
GO:0002250_adaptive_immune_response	170	0.59	0.28	0.970703	1	TRPM4
GO:0002286_T_cell_activation_involved_in_immune_response	23	0	0	1	1
GO:0002323_natural_killer_cell_activation_involved_in_immune_response	19	0	0	1	1
GO:0002377_immunoglobulin_production	9	0	0	1	1
GO:0002430_complement_receptor_mediated_signaling_pathway	12	0	0	1	1
GO:0002755_MyD88-dependent_toll-like_receptor_signaling_pathway	32	0	0	1	1
GO:0003407_neural_retina_development	15	0	0	1	1
GO:0005513_detection_of_calcium_ion	13	0	0	1	1
GO:0006120_mitochondrial_electron_transport,_NADH_to_ubiquinone	49	0	0	1	1
GO:0006122_mitochondrial_electron_transport,_ubiquinol_to_cytochrome_c	14	0	0	1	1
GO:0006123_mitochondrial_electron_transport,_cytochrome_c_to_oxygen	20	0	0	1	1
GO:0006352_DNA-templated_transcription,_initiation	30	0	0	1	1
GO:0006355_regulation_of_transcription,_DNA-templated	492	2.03	0.99	0.554633	1	STAT3;SRRT;GPBP1;PATZ1;TP53;RELA;CXXC1;PRMT7;TRIM22;PAK6
GO:0006368_transcription_elongation_from_RNA_polymerase_II_promoter	74	1.35	0.65	0.784312	1	POLR2H
GO:0006465_signal_peptide_processing	11	0	0	1	1
GO:0006614_SRP-dependent_cotranslational_protein_targeting_to_membrane	89	0	0	1	1
GO:0006617_SRP-dependent_cotranslational_protein_targeting_to_membrane,_signal_sequence_recognition	10	0	0	1	1
GO:0006813_potassium_ion_transport	69	1.45	0.7	0.760726	1	KCNK9
GO:0006814_sodium_ion_transport	81	0	0	1	1
GO:0006820_anion_transport	11	0	0	1	1
GO:0006826_iron_ion_transport	17	0	0	1	1
GO:0006839_mitochondrial_transport	14	0	0	1	1
GO:0006869_lipid_transport	61	0	0	1	1
GO:0006891_intra-Golgi_vesicle-mediated_transport	31	0	0	1	1
GO:0006892_post-Golgi_vesicle-mediated_transport	18	0	0	1	1
GO:0006893_Golgi_to_plasma_membrane_transport	26	0	0	1	1
GO:0006900_vesicle_budding_from_membrane	11	0	0	1	1
GO:0006904_vesicle_docking_involved_in_exocytosis	31	0	0	1	1
GO:0006959_humoral_immune_response	56	0	0	1	1
GO:0007009_plasma_membrane_organization	16	0	0	1	1
GO:0007015_actin_filament_organization	92	1.09	0.52	0.851577	1	HIP1R
GO:0007019_microtubule_depolymerization	15	0	0	1	1
GO:0007026_negative_regulation_of_microtubule_depolymerization	25	0	0	1	1
GO:0007129_synapsis	24	0	0	1	1
GO:0007156_homophilic_cell_adhesion_via_plasma_membrane_adhesion_molecules	167	1.2	0.58	0.85919	1	IGSF9;PIK3CB
GO:0007157_heterophilic_cell-cell_adhesion_via_plasma_membrane_cell_adhesion_molecules	46	0	0	1	1
GO:0007158_neuron_cell-cell_adhesion	16	0	0	1	1
GO:0007166_cell_surface_receptor_signaling_pathway	206	1.94	0.95	0.611551	1	EDNRB;BIRC2;SST;CCKBR
GO:0007171_activation_of_transmembrane_receptor_protein_tyrosine_kinase_activity	13	0	0	1	1
GO:0007173_epidermal_growth_factor_receptor_signaling_pathway	48	0	0	1	1
GO:0007175_negative_regulation_of_epidermal_growth_factor-activated_receptor_activity	14	0	0	1	1
GO:0007187_G_protein-coupled_receptor_signaling_pathway,_coupled_to_cyclic_nucleotide_second_messenger	63	0	0	1	1
GO:0007188_adenylate_cyclase-modulating_G_protein-coupled_receptor_signaling_pathway	54	1.85	0.9	0.67337	1	ADRA1B
GO:0007212_dopamine_receptor_signaling_pathway	15	0	0	1	1
GO:0007213_G_protein-coupled_acetylcholine_receptor_signaling_pathway	15	0	0	1	1
GO:0007214_gamma-aminobutyric_acid_signaling_pathway	25	0	0	1	1
GO:0007215_glutamate_receptor_signaling_pathway	16	0	0	1	1
GO:0007216_G_protein-coupled_glutamate_receptor_signaling_pathway	15	0	0	1	1
GO:0007221_positive_regulation_of_transcription_of_Notch_receptor_target	18	0	0	1	1
GO:0007223_Wnt_signaling_pathway,_calcium_modulating_pathway	37	0	0	1	1
GO:0007224_smoothened_signaling_pathway	64	1.56	0.76	0.734565	1	HES5
GO:0007254_JNK_cascade	48	0	0	1	1
GO:0007263_nitric_oxide_mediated_signal_transduction	19	0	0	1	1
GO:0007271_synaptic_transmission,_cholinergic	24	0	0	1	1
GO:0007288_sperm_axoneme_assembly	12	0	0	1	1
GO:0007409_axonogenesis	78	1.28	0.62	0.801499	1	TRIM46
GO:0007416_synapse_assembly	62	1.61	0.78	0.723318	1	BDNF
GO:0008045_motor_neuron_axon_guidance	23	0	0	1	1
GO:0008154_actin_polymerization_or_depolymerization	13	0	0	1	1
GO:0008333_endosome_to_lysosome_transport	45	2.22	1.09	0.606345	1	BIN1
GO:0008543_fibroblast_growth_factor_receptor_signaling_pathway	78	1.28	0.62	0.801499	1	POLR2H
GO:0008589_regulation_of_smoothened_signaling_pathway	21	0	0	1	1
GO:0008631_intrinsic_apoptotic_signaling_pathway_in_response_to_oxidative_stress	14	0	0	1	1
GO:0008645_hexose_transmembrane_transport	13	0	0	1	1
GO:0009755_hormone-mediated_signaling_pathway	47	2.13	1.04	0.622336	1	CRHBP
GO:0010469_regulation_of_signaling_receptor_activity	17	0	0	1	1
GO:0010524_positive_regulation_of_calcium_ion_transport_into_cytosol	12	0	0	1	1
GO:0010737_protein_kinase_A_signaling	13	0	0	1	1
GO:0010804_negative_regulation_of_tumor_necrosis_factor-mediated_signaling_pathway	24	0	0	1	1
GO:0010880_regulation_of_release_of_sequestered_calcium_ion_into_cytosol_by_sarcoplasmic_reticulum	20	0	0	1	1
GO:0010881_regulation_of_cardiac_muscle_contraction_by_regulation_of_the_release_of_sequestered_calcium_ion	24	0	0	1	1
GO:0010917_negative_regulation_of_mitochondrial_membrane_potential	14	0	0	1	1
GO:0014066_regulation_of_phosphatidylinositol_3-kinase_signaling	21	0	0	1	1
GO:0014068_positive_regulation_of_phosphatidylinositol_3-kinase_signaling	87	2.3	1.13	0.534711	1	PIK3CB;KDR
GO:0015671_oxygen_transport	15	0	0	1	1
GO:0015693_magnesium_ion_transport	13	0	0	1	1
GO:0015698_inorganic_anion_transport	24	0	0	1	1
GO:0015711_organic_anion_transport	14	0	0	1	1
GO:0015721_bile_acid_and_bile_salt_transport	26	0	0	1	1
GO:0015813_L-glutamate_transmembrane_transport	15	0	0	1	1
GO:0015867_ATP_transport	12	0	0	1	1
GO:0015909_long-chain_fatty_acid_transport	14	0	0	1	1
GO:0015914_phospholipid_transport	28	0	0	1	1
GO:0015986_ATP_synthesis_coupled_proton_transport	12	0	0	1	1
GO:0016056_rhodopsin_mediated_signaling_pathway	11	0	0	1	1
GO:0016197_endosomal_transport	76	0	0	1	1
GO:0016254_preassembly_of_GPI_anchor_in_ER_membrane	17	0	0	1	1
GO:0016322_neuron_remodeling	12	0	0	1	1
GO:0016339_calcium-dependent_cell-cell_adhesion_via_plasma_membrane_cell_adhesion_molecules	46	0	0	1	1
GO:0016601_Rac_protein_signal_transduction	21	0	0	1	1
GO:0017015_regulation_of_transforming_growth_factor_beta_receptor_signaling_pathway	20	0	0	1	1
GO:0019083_viral_transcription	109	1.83	0.89	0.657082	1	NUP210;AAAS
GO:0019226_transmission_of_nerve_impulse	19	0	0	1	1
GO:0019228_neuronal_action_potential	29	0	0	1	1
GO:0021527_spinal_cord_association_neuron_differentiation	13	0	0	1	1
GO:0022400_regulation_of_rhodopsin_mediated_signaling_pathway	26	0	0	1	1
GO:0022904_respiratory_electron_transport_chain	15	0	0	1	1
GO:0023019_signal_transduction_involved_in_regulation_of_gene_expression	20	0	0	1	1
GO:0030031_cell_projection_assembly	18	0	0	1	1
GO:0030048_actin_filament-based_movement	19	0	0	1	1
GO:0030178_negative_regulation_of_Wnt_signaling_pathway	43	2.33	1.14	0.589677	1	SFRP4
GO:0030182_neuron_differentiation	134	2.24	1.1	0.519721	1	ID2;ID4;MBD1
GO:0030301_cholesterol_transport	19	0	0	1	1
GO:0030511_positive_regulation_of_transforming_growth_factor_beta_receptor_signaling_pathway	29	0	0	1	1
GO:0030514_negative_regulation_of_BMP_signaling_pathway	50	2	0.98	0.645116	1	LEMD2
GO:0030516_regulation_of_axon_extension	14	0	0	1	1
GO:0030520_intracellular_estrogen_receptor_signaling_pathway	21	0	0	1	1
GO:0030521_androgen_receptor_signaling_pathway	36	2.78	1.37	0.525597	1	FKBP4
GO:0030838_positive_regulation_of_actin_filament_polymerization	53	1.89	0.92	0.666524	1	BIN1
GO:0030866_cortical_actin_cytoskeleton_organization	27	0	0	1	1
GO:0030948_negative_regulation_of_vascular_endothelial_growth_factor_receptor_signaling_pathway	13	0	0	1	1
GO:0030949_positive_regulation_of_vascular_endothelial_growth_factor_receptor_signaling_pathway	19	0	0	1	1
GO:0030950_establishment_or_maintenance_of_actin_cytoskeleton_polarity	12	0	0	1	1
GO:0031110_regulation_of_microtubule_polymerization_or_depolymerization	13	0	0	1	1
GO:0031116_positive_regulation_of_microtubule_polymerization	26	0	0	1	1
GO:0031532_actin_cytoskeleton_reorganization	56	0	0	1	1
GO:0031623_receptor_internalization	40	0	0	1	1
GO:0031663_lipopolysaccharide-mediated_signaling_pathway	34	0	0	1	1
GO:0031665_negative_regulation_of_lipopolysaccharide-mediated_signaling_pathway	11	0	0	1	1
GO:0031929_TOR_signaling	19	0	0	1	1
GO:0032006_regulation_of_TOR_signaling	18	0	0	1	1
GO:0032008_positive_regulation_of_TOR_signaling	33	0	0	1	1
GO:0032230_positive_regulation_of_synaptic_transmission,_GABAergic	12	0	0	1	1
GO:0032233_positive_regulation_of_actin_filament_bundle_assembly	13	0	0	1	1
GO:0032367_intracellular_cholesterol_transport	11	0	0	1	1
GO:0032402_melanosome_transport	21	0	0	1	1
GO:0032465_regulation_of_cytokinesis	41	0	0	1	1
GO:0032467_positive_regulation_of_cytokinesis	39	0	0	1	1
GO:0032479_regulation_of_type_I_interferon_production	12	0	0	1	1
GO:0032480_negative_regulation_of_type_I_interferon_production	31	0	0	1	1
GO:0032482_Rab_protein_signal_transduction	70	0	0	1	1
GO:0032486_Rap_protein_signal_transduction	10	0	0	1	1
GO:0032509_endosome_transport_via_multivesicular_body_sorting_pathway	12	0	0	1	1
GO:0032688_negative_regulation_of_interferon-beta_production	12	0	0	1	1
GO:0032689_negative_regulation_of_interferon-gamma_production	28	0	0	1	1
GO:0032691_negative_regulation_of_interleukin-1_beta_production	15	0	0	1	1
GO:0032693_negative_regulation_of_interleukin-10_production	14	0	0	1	1
GO:0032695_negative_regulation_of_interleukin-12_production	12	0	0	1	1
GO:0032700_negative_regulation_of_interleukin-17_production	14	0	0	1	1
GO:0032715_negative_regulation_of_interleukin-6_production	34	0	0	1	1
GO:0032722_positive_regulation_of_chemokine_production	19	0	0	1	1
GO:0032727_positive_regulation_of_interferon-alpha_production	12	0	0	1	1
GO:0032729_positive_regulation_of_interferon-gamma_production	45	2.22	1.09	0.606345	1	BCL3
GO:0032731_positive_regulation_of_interleukin-1_beta_production	16	0	0	1	1
GO:0032733_positive_regulation_of_interleukin-10_production	25	0	0	1	1
GO:0032735_positive_regulation_of_interleukin-12_production	25	0	0	1	1
GO:0032740_positive_regulation_of_interleukin-17_production	14	0	0	1	1
GO:0032743_positive_regulation_of_interleukin-2_production	14	0	0	1	1
GO:0032753_positive_regulation_of_interleukin-4_production	21	0	0	1	1
GO:0032755_positive_regulation_of_interleukin-6_production	58	1.72	0.84	0.699378	1	ADCYAP1
GO:0032757_positive_regulation_of_interleukin-8_production	27	0	0	1	1
GO:0032786_positive_regulation_of_DNA-templated_transcription,_elongation	15	0	0	1	1
GO:0032801_receptor_catabolic_process	13	0	0	1	1
GO:0032874_positive_regulation_of_stress-activated_MAPK_cascade	17	0	0	1	1
GO:0032897_negative_regulation_of_viral_transcription	12	0	0	1	1
GO:0032968_positive_regulation_of_transcription_elongation_from_RNA_polymerase_II_promoter	18	0	0	1	1
GO:0033146_regulation_of_intracellular_estrogen_receptor_signaling_pathway	15	0	0	1	1
GO:0033147_negative_regulation_of_intracellular_estrogen_receptor_signaling_pathway	13	0	0	1	1
GO:0033148_positive_regulation_of_intracellular_estrogen_receptor_signaling_pathway	11	0	0	1	1
GO:0033173_calcineurin-NFAT_signaling_cascade	12	0	0	1	1
GO:0033572_transferrin_transport	36	2.78	1.37	0.525597	1	ATP6V0A1
GO:0034142_toll-like_receptor_4_signaling_pathway	15	0	0	1	1
GO:0034162_toll-like_receptor_9_signaling_pathway	16	0	0	1	1
GO:0034244_negative_regulation_of_transcription_elongation_from_RNA_polymerase_II_promoter	12	0	0	1	1
GO:0034453_microtubule_anchoring	15	0	0	1	1
GO:0034765_regulation_of_ion_transmembrane_transport	113	0	0	1	1
GO:0035025_positive_regulation_of_Rho_protein_signal_transduction	29	0	0	1	1
GO:0035235_ionotropic_glutamate_receptor_signaling_pathway	23	0	0	1	1
GO:0035249_synaptic_transmission,_glutamatergic	28	0	0	1	1
GO:0035418_protein_localization_to_synapse	12	0	0	1	1
GO:0035435_phosphate_ion_transmembrane_transport	14	0	0	1	1
GO:0035457_cellular_response_to_interferon-alpha	11	0	0	1	1
GO:0035589_G_protein-coupled_purinergic_nucleotide_receptor_signaling_pathway	13	0	0	1	1
GO:0035721_intraciliary_retrograde_transport	11	0	0	1	1
GO:0035722_interleukin-12-mediated_signaling_pathway	47	0	0	1	1
GO:0035725_sodium_ion_transmembrane_transport	66	1.52	0.74	0.745355	1	SLC3A2
GO:0035735_intraciliary_transport_involved_in_cilium_assembly	40	2.5	1.23	0.563346	1	KIF17
GO:0038084_vascular_endothelial_growth_factor_signaling_pathway	14	0	0	1	1
GO:0038095_Fc-epsilon_receptor_signaling_pathway	110	1.82	0.88	0.661982	1	RELA;PIK3CB
GO:0038128_ERBB2_signaling_pathway	31	0	0	1	1
GO:0042073_intraciliary_transport	26	0	0	1	1
GO:0042391_regulation_of_membrane_potential	101	1.98	0.97	0.615821	1	GABRQ;GLRA1
GO:0042551_neuron_maturation	14	0	0	1	1
GO:0042770_signal_transduction_in_response_to_DNA_damage	12	0	0	1	1
GO:0042776_mitochondrial_ATP_synthesis_coupled_proton_transport	21	0	0	1	1
GO:0042953_lipoprotein_transport	14	0	0	1	1
GO:0043122_regulation_of_I-kappaB_kinase/NF-kappaB_signaling	17	0	0	1	1
GO:0043252_sodium-independent_organic_anion_transport	16	0	0	1	1
GO:0043517_positive_regulation_of_DNA_damage_response,_signal_transduction_by_p53_class_mediator	12	0	0	1	1
GO:0043518_negative_regulation_of_DNA_damage_response,_signal_transduction_by_p53_class_mediator	15	0	0	1	1
GO:0043523_regulation_of_neuron_apoptotic_process	17	0	0	1	1
GO:0043568_positive_regulation_of_insulin-like_growth_factor_receptor_signaling_pathway	13	0	0	1	1
GO:0043691_reverse_cholesterol_transport	16	0	0	1	1
GO:0043922_negative_regulation_by_host_of_viral_transcription	12	0	0	1	1
GO:0043923_positive_regulation_by_host_of_viral_transcription	17	0	0	1	1
GO:0045086_positive_regulation_of_interleukin-2_biosynthetic_process	13	0	0	1	1
GO:0045087_innate_immune_response	392	1.02	0.49	0.960955	1	PJA2;SIRT2;TRIM26;IFIT5
GO:0045089_positive_regulation_of_innate_immune_response	23	0	0	1	1
GO:0045416_positive_regulation_of_interleukin-8_biosynthetic_process	12	0	0	1	1
GO:0045494_photoreceptor_cell_maintenance	38	0	0	1	1
GO:0045745_positive_regulation_of_G_protein-coupled_receptor_signaling_pathway	14	0	0	1	1
GO:0045943_positive_regulation_of_transcription_by_RNA_polymerase_I	12	0	0	1	1
GO:0046785_microtubule_polymerization	12	0	0	1	1
GO:0046907_intracellular_transport	18	0	0	1	1
GO:0046928_regulation_of_neurotransmitter_secretion	19	0	0	1	1
GO:0047496_vesicle_transport_along_microtubule	16	0	0	1	1
GO:0048009_insulin-like_growth_factor_receptor_signaling_pathway	13	0	0	1	1
GO:0048016_inositol_phosphate-mediated_signaling	12	0	0	1	1
GO:0048096_chromatin-mediated_maintenance_of_transcription	11	0	0	1	1
GO:0048143_astrocyte_activation	17	0	0	1	1
GO:0048169_regulation_of_long-term_neuronal_synaptic_plasticity	21	0	0	1	1
GO:0048172_regulation_of_short-term_neuronal_synaptic_plasticity	14	0	0	1	1
GO:0048208_COPII_vesicle_coating	63	1.59	0.77	0.729	1	SEC24D
GO:0048384_retinoic_acid_receptor_signaling_pathway	15	0	0	1	1
GO:0048489_synaptic_vesicle_transport	15	0	0	1	1
GO:0048665_neuron_fate_specification	16	0	0	1	1
GO:0048678_response_to_axon_injury	29	0	0	1	1
GO:0048814_regulation_of_dendrite_morphogenesis	21	0	0	1	1
GO:0050710_negative_regulation_of_cytokine_secretion	15	0	0	1	1
GO:0050713_negative_regulation_of_interleukin-1_beta_secretion	13	0	0	1	1
GO:0050715_positive_regulation_of_cytokine_secretion	27	0	0	1	1
GO:0050718_positive_regulation_of_interleukin-1_beta_secretion	33	0	0	1	1
GO:0050772_positive_regulation_of_axonogenesis	32	0	0	1	1
GO:0050773_regulation_of_dendrite_development	15	0	0	1	1
GO:0050776_regulation_of_immune_response	145	1.38	0.67	0.800332	1	CD276;BCL6
GO:0050806_positive_regulation_of_synaptic_transmission	18	0	0	1	1
GO:0050808_synapse_organization	39	0	0	1	1
GO:0050848_regulation_of_calcium-mediated_signaling	12	0	0	1	1
GO:0050850_positive_regulation_of_calcium-mediated_signaling	17	0	0	1	1
GO:0050853_B_cell_receptor_signaling_pathway	35	0	0	1	1
GO:0050855_regulation_of_B_cell_receptor_signaling_pathway	11	0	0	1	1
GO:0050905_neuromuscular_process	19	0	0	1	1
GO:0051013_microtubule_severing	11	0	0	1	1
GO:0051017_actin_filament_bundle_assembly	40	0	0	1	1
GO:0051028_mRNA_transport	43	2.33	1.14	0.589677	1	ZFP36L1
GO:0051044_positive_regulation_of_membrane_protein_ectodomain_proteolysis	15	0	0	1	1
GO:0051092_positive_regulation_of_NF-kappaB_transcription_factor_activity	149	2.01	0.98	0.591533	1	STAT3;RELA;TRIM22
GO:0051209_release_of_sequestered_calcium_ion_into_cytosol	46	0	0	1	1
GO:0051279_regulation_of_release_of_sequestered_calcium_ion_into_cytosol	12	0	0	1	1
GO:0051402_neuron_apoptotic_process	38	2.63	1.29	0.544862	1	TP53
GO:0051403_stress-activated_MAPK_cascade	27	0	0	1	1
GO:0051480_regulation_of_cytosolic_calcium_ion_concentration	38	2.63	1.29	0.544862	1	TRPC4
GO:0051481_negative_regulation_of_cytosolic_calcium_ion_concentration	12	0	0	1	1
GO:0051482_positive_regulation_of_cytosolic_calcium_ion_concentration_involved_in_phospholipase_C-activating_G_protein-coupled_signaling_pathway	31	0	0	1	1
GO:0051493_regulation_of_cytoskeleton_organization	26	0	0	1	1
GO:0051560_mitochondrial_calcium_ion_homeostasis	15	0	0	1	1
GO:0051592_response_to_calcium_ion	57	1.75	0.85	0.693076	1	TXNIP
GO:0051896_regulation_of_protein_kinase_B_signaling	11	0	0	1	1
GO:0051897_positive_regulation_of_protein_kinase_B_signaling	176	1.7	0.83	0.702138	1	MEIS3;ILK;PIK3CB
GO:0051926_negative_regulation_of_calcium_ion_transport	15	0	0	1	1
GO:0051928_positive_regulation_of_calcium_ion_transport	29	0	0	1	1
GO:0051932_synaptic_transmission,_GABAergic	13	0	0	1	1
GO:0051966_regulation_of_synaptic_transmission,_glutamatergic	29	0	0	1	1
GO:0055074_calcium_ion_homeostasis	22	0	0	1	1
GO:0060071_Wnt_signaling_pathway,_planar_cell_polarity_pathway	89	1.12	0.54	0.842034	1	DVL2
GO:0060074_synapse_maturation	12	0	0	1	1
GO:0060252_positive_regulation_of_glial_cell_proliferation	17	0	0	1	1
GO:0060307_regulation_of_ventricular_cardiac_muscle_cell_membrane_repolarization	23	0	0	1	1
GO:0060314_regulation_of_ryanodine-sensitive_calcium-release_channel_activity	16	0	0	1	1
GO:0060315_negative_regulation_of_ryanodine-sensitive_calcium-release_channel_activity	11	0	0	1	1
GO:0060334_regulation_of_interferon-gamma-mediated_signaling_pathway	13	0	0	1	1
GO:0060337_type_I_interferon_signaling_pathway	67	1.49	0.72	0.750585	1	IRF1
GO:0060339_negative_regulation_of_type_I_interferon-mediated_signaling_pathway	14	0	0	1	1
GO:0060340_positive_regulation_of_type_I_interferon-mediated_signaling_pathway	13	0	0	1	1
GO:0060395_SMAD_protein_signal_transduction	56	1.79	0.87	0.686643	1	BMP7
GO:0060765_regulation_of_androgen_receptor_signaling_pathway	11	0	0	1	1
GO:0060766_negative_regulation_of_androgen_receptor_signaling_pathway	15	0	0	1	1
GO:0060828_regulation_of_canonical_Wnt_signaling_pathway	26	0	0	1	1
GO:0061025_membrane_fusion	31	0	0	1	1
GO:0061314_Notch_signaling_involved_in_heart_development	11	0	0	1	1
GO:0061351_neural_precursor_cell_proliferation	11	0	0	1	1
GO:0061418_regulation_of_transcription_from_RNA_polymerase_II_promoter_in_response_to_hypoxia	71	0	0	1	1
GO:0061844_antimicrobial_humoral_immune_response_mediated_by_antimicrobial_peptide	67	1.49	0.72	0.750585	1	CXCL1
GO:0070098_chemokine-mediated_signaling_pathway	70	1.43	0.69	0.76564	1	CXCL1
GO:0070104_negative_regulation_of_interleukin-6-mediated_signaling_pathway	11	0	0	1	1
GO:0070374_positive_regulation_of_ERK1_and_ERK2_cascade	212	1.42	0.68	0.812113	1	ADCYAP1;SEMA7A;KDR
GO:0070423_nucleotide-binding_oligomerization_domain_containing_signaling_pathway	22	0	0	1	1
GO:0070498_interleukin-1-mediated_signaling_pathway	96	1.04	0.5	0.863411	1	RELA
GO:0070885_negative_regulation_of_calcineurin-NFAT_signaling_cascade	14	0	0	1	1
GO:0070886_positive_regulation_of_calcineurin-NFAT_signaling_cascade	16	0	0	1	1
GO:0071542_dopaminergic_neuron_differentiation	21	0	0	1	1
GO:0071577_zinc_ion_transmembrane_transport	16	0	0	1	1
GO:0071679_commissural_neuron_axon_guidance	12	0	0	1	1
GO:0071711_basement_membrane_organization	11	0	0	1	1
GO:0071805_potassium_ion_transmembrane_transport	116	1.72	0.84	0.690211	1	SNAP25;KCNK9
GO:0072425_signal_transduction_involved_in_G2_DNA_damage_checkpoint	11	0	0	1	1
GO:0086002_cardiac_muscle_cell_action_potential_involved_in_contraction	16	0	0	1	1
GO:0086005_ventricular_cardiac_muscle_cell_action_potential	18	0	0	1	1
GO:0086010_membrane_depolarization_during_action_potential	16	0	0	1	1
GO:0086012_membrane_depolarization_during_cardiac_muscle_cell_action_potential	12	0	0	1	1
GO:0090197_positive_regulation_of_chemokine_secretion	12	0	0	1	1
GO:0090280_positive_regulation_of_calcium_ion_import	17	0	0	1	1
GO:0090316_positive_regulation_of_intracellular_protein_transport	22	0	0	1	1
GO:0097120_receptor_localization_to_synapse	11	0	0	1	1
GO:0097190_apoptotic_signaling_pathway	59	1.69	0.82	0.70555	1	UACA
GO:0097191_extrinsic_apoptotic_signaling_pathway	44	0	0	1	1
GO:0097623_potassium_ion_export_across_plasma_membrane	15	0	0	1	1
GO:0098656_anion_transmembrane_transport	37	0	0	1	1
GO:0098664_G_protein-coupled_serotonin_receptor_signaling_pathway	27	0	0	1	1
GO:0098742_cell-cell_adhesion_via_plasma-membrane_adhesion_molecules	13	0	0	1	1
GO:0098915_membrane_repolarization_during_ventricular_cardiac_muscle_cell_action_potential	12	0	0	1	1
GO:0098974_postsynaptic_actin_cytoskeleton_organization	11	0	0	1	1
GO:0099054_presynapse_assembly	13	0	0	1	1
GO:0099072_regulation_of_postsynaptic_membrane_neurotransmitter_receptor_levels	11	0	0	1	1
GO:0099149_regulation_of_postsynaptic_neurotransmitter_receptor_internalization	11	0	0	1	1
GO:0099151_regulation_of_postsynaptic_density_assembly	11	0	0	1	1
GO:0099175_regulation_of_postsynapse_organization	17	0	0	1	1
GO:0099560_synaptic_membrane_adhesion	23	0	0	1	1
GO:0099566_regulation_of_postsynaptic_cytosolic_calcium_ion_concentration	11	0	0	1	1
GO:0150078_positive_regulation_of_neuroinflammatory_response	11	0	0	1	1
GO:1900016_negative_regulation_of_cytokine_production_involved_in_inflammatory_response	21	0	0	1	1
GO:1900017_positive_regulation_of_cytokine_production_involved_in_inflammatory_response	20	0	0	1	1
GO:1900165_negative_regulation_of_interleukin-6_secretion	12	0	0	1	1
GO:1900272_negative_regulation_of_long-term_synaptic_potentiation	13	0	0	1	1
GO:1900273_positive_regulation_of_long-term_synaptic_potentiation	21	0	0	1	1
GO:1900747_negative_regulation_of_vascular_endothelial_growth_factor_signaling_pathway	14	0	0	1	1
GO:1901214_regulation_of_neuron_death	17	0	0	1	1
GO:1901216_positive_regulation_of_neuron_death	37	0	0	1	1
GO:1901379_regulation_of_potassium_ion_transmembrane_transport	16	0	0	1	1
GO:1901381_positive_regulation_of_potassium_ion_transmembrane_transport	12	0	0	1	1
GO:1902043_positive_regulation_of_extrinsic_apoptotic_signaling_pathway_via_death_domain_receptors	11	0	0	1	1
GO:1902166_negative_regulation_of_intrinsic_apoptotic_signaling_pathway_in_response_to_DNA_damage_by_p53_class_mediator	16	0	0	1	1
GO:1902176_negative_regulation_of_oxidative_stress-induced_intrinsic_apoptotic_signaling_pathway	13	0	0	1	1
GO:1902230_negative_regulation_of_intrinsic_apoptotic_signaling_pathway_in_response_to_DNA_damage	15	0	0	1	1
GO:1902287_semaphorin-plexin_signaling_pathway_involved_in_axon_guidance	12	0	0	1	1
GO:1902600_proton_transmembrane_transport	114	1.75	0.85	0.681023	1	ATP6V0A1;ATP2A1
GO:1903076_regulation_of_protein_localization_to_plasma_membrane	16	0	0	1	1
GO:1903077_negative_regulation_of_protein_localization_to_plasma_membrane	18	0	0	1	1
GO:1903508_positive_regulation_of_nucleic_acid-templated_transcription	82	1.22	0.59	0.817318	1	BIRC2
GO:1903830_magnesium_ion_transmembrane_transport	15	0	0	1	1
GO:1903980_positive_regulation_of_microglial_cell_activation	11	0	0	1	1
GO:1904262_negative_regulation_of_TORC1_signaling	18	0	0	1	1
GO:1905606_regulation_of_presynapse_assembly	27	0	0	1	1
GO:1990126_retrograde_transport,_endosome_to_plasma_membrane	18	0	0	1	1
GO:1990138_neuron_projection_extension	19	0	0	1	1
GO:1990869_cellular_response_to_chemokine	16	0	0	1	1
GO:2000179_positive_regulation_of_neural_precursor_cell_proliferation	21	0	0	1	1
GO:2000249_regulation_of_actin_cytoskeleton_reorganization	19	0	0	1	1
GO:2000251_positive_regulation_of_actin_cytoskeleton_reorganization	19	0	0	1	1
GO:2000272_negative_regulation_of_signaling_receptor_activity	35	0	0	1	1
GO:2000300_regulation_of_synaptic_vesicle_exocytosis	50	2	0.98	0.645116	1	SEPT5
GO:2000311_regulation_of_AMPA_receptor_activity	21	0	0	1	1
GO:2000649_regulation_of_sodium_ion_transmembrane_transporter_activity	18	0	0	1	1
GO:2000678_negative_regulation_of_transcription_regulatory_region_DNA_binding	13	0	0	1	1
GO:2000679_positive_regulation_of_transcription_regulatory_region_DNA_binding	16	0	0	1	1
GO:2001222_regulation_of_neuron_migration	14	0	0	1	1
GO:2001224_positive_regulation_of_neuron_migration	15	0	0	1	1
GO:2001240_negative_regulation_of_extrinsic_apoptotic_signaling_pathway_in_absence_of_ligand	36	0	0	1	1
GO:2001241_positive_regulation_of_extrinsic_apoptotic_signaling_pathway_in_absence_of_ligand	11	0	0	1	1
GO:2001256_regulation_of_store-operated_calcium_entry	14	0	0	1	1

## Sheet: KEGG_ Unique in Th4M - ORA_T4M_
ORA_T4M_uniqueFromTha-kegg_all
geneset	NGenes	pctDE	OR	pvalue	FDR	external_gene_name.DE
hsa04917_Prolactin_signaling_pathway	70	14.29	8.1	1.58139e-06	0.00011386	STAT3;RAF1;STAT5B;FOXO3;RELA;MAPK12;SOCS2;PIK3CB;IRF1;TH
hsa04722_Neurotrophin_signaling_pathway	119	8.4	4.45	0.000173509	0.00624634	RAF1;SH2B1;PRDM4;TP53;FOXO3;RELA;MAPK12;PSEN2;PIK3CB;BDNF
hsa04014_Ras_signaling_pathway	232	6.03	3.12	0.000333782	0.00801078	RAF1;GNG4;RELA;EPHA2;PIK3CB;RASSF1;PLA2G6;PAK6;PLD2;BDNF;RASGRF1;KDR;EFNA1
hsa04022_cGMP-PKG_signaling_pathway	167	6.59	3.42	0.000689511	0.0124112	ATP1B1;RAF1;EDNRB;SRF;ADCY3;PDE2A;RGS2;EDNRA;MYH7;ADRA1B;ATP2A1
hsa04010_MAPK_signaling_pathway	294	5.1	2.61	0.00118387	0.0170478	DUSP4;RAF1;PPP5C;CACNB3;TP53;SRF;RELA;MAPK12;EPHA2;NR4A1;BDNF;RASGRF1;DUSP5;KDR;EFNA1
hsa04024_cAMP_signaling_pathway	216	5.56	2.85	0.00176296	0.019621	ATP1B1;RAF1;PDE10A;RELA;ADCY3;ADCYAP1;PIK3CB;PLD2;EDNRA;BDNF;SST;ATP2A1
hsa04062_Chemokine_signaling_pathway	192	5.73	2.94	0.00212364	0.019621	STAT3;RAF1;GNG4;CXCR4;STAT5B;FOXO3;RELA;PXN;ADCY3;PIK3CB;CXCL1
hsa04668_TNF_signaling_pathway	112	7.14	3.72	0.00218011	0.019621	BIRC2;RELA;MAPK12;PIK3CB;JUNB;IRF1;BCL3;CXCL1
hsa04330_Notch_signaling_pathway	53	9.43	5.02	0.00452755	0.0362204	DTX3;DVL2;KAT2A;HES5;PSEN2
hsa04625_C-type_lectin_receptor_signaling_pathway	104	6.73	3.48	0.0056136	0.0367436	RAF1;RELA;MAPK12;PIK3CB;IRF1;BCL3;EGR3
hsa04660_T_cell_receptor_signaling_pathway	104	6.73	3.48	0.0056136	0.0367436	RAF1;CDK4;RELA;MAPK12;PIK3CB;PAK6
hsa04151_PI3K-Akt_signaling_pathway	354	4.24	2.15	0.00675703	0.036765	RAF1;GNG4;CDK4;PHLPP1;TP53;FOXO3;RELA;ITGA7;CRTC2;EPHA2;PIK3CB;NR4A1;BDNF;KDR;EFNA1
hsa04370_VEGF_signaling_pathway	59	8.47	4.46	0.00714875	0.036765	RAF1;PXN;MAPK12;PIK3CB;KDR
hsa04630_JAK-STAT_signaling_pathway	162	5.56	2.84	0.00636101	0.036765	STAT3;RAF1;STAT5B;IL6ST;PIAS3;SOCS2;PIK3CB;STAT6;IL13RA2
hsa04350_TGF-beta_signaling_pathway	94	6.38	3.28	0.0128595	0.0529496	ID2;ID4;BMPR1A;BMP7;TGIF1;ACVR1
hsa04657_IL-17_signaling_pathway	94	6.38	3.28	0.0128595	0.0529496	MAPK6;TRAF4;RELA;MAPK12;MAPK15;CXCL1
hsa04810_Regulation_of_actin_cytoskeleton	214	4.67	2.37	0.0132374	0.0529496	RAF1;CXCR4;PXN;ITGA7;GSN;ARHGEF1;FGD3;PIK3CB;PAK6
hsa04919_Thyroid_hormone_signaling_pathway	121	5.79	2.96	0.012438	0.0529496	ATP1B1;RAF1;TP53;KAT2A;PIK3CB;MYH7;ATP2A1
hsa04926_Relaxin_signaling_pathway	129	5.43	2.77	0.0171586	0.0617711	RAF1;GNG4;EDNRB;RELA;ADCY3;MAPK12;PIK3CB
hsa04933_AGE-RAGE_signaling_pathway_in_diabetic_complications	100	6	3.07	0.0170126	0.0617711	STAT3;CDK4;STAT5B;RELA;MAPK12;PIK3CB
hsa04068_FoxO_signaling_pathway	131	5.34	2.72	0.0185125	0.0634715	STAT3;RAF1;GABARAPL1;FOXO3;MAPK12;BCL6;PIK3CB
hsa04012_ErbB_signaling_pathway	85	5.88	3.01	0.0305248	0.0980628	RAF1;STAT5B;PIK3CB;PAK6
hsa05170_Human_immunodeficiency_virus_1_infection	212	4.25	2.14	0.0313256	0.0980628	RAF1;GNG4;CXCR4;RELA;PXN;MAPK12;PIK3CB;PAK6
hsa04071_Sphingolipid_signaling_pathway	119	5.04	2.56	0.0360024	0.100209	RAF1;TP53;RELA;MAPK12;PIK3CB;PLD2
hsa04261_Adrenergic_signaling_in_cardiomyocytes	150	4.67	2.36	0.0352641	0.100209	ATP1B1;CACNB3;ADCY3;MAPK12;MYH7;ADRA1B;ATP2A1
hsa04727_GABAergic_synapse	89	5.62	2.86	0.0361866	0.100209	GNG4;GAD1;GABARAPL1;ADCY3;GABRQ
hsa04664_Fc_epsilon_RI_signaling_pathway	68	5.88	3	0.0508635	0.135636	RAF1;MAPK12;PIK3CB;INPP5D
hsa05120_Epithelial_cell_signaling_in_Helicobacter_pylori_infection	70	5.71	2.91	0.0555051	0.142727	ATP6V0A1;RELA;MAPK12;CXCL1
hsa04115_p53_signaling_pathway	73	5.48	2.78	0.0628802	0.156116	CDK4;TP53;ZMAT3;RRM2B
hsa04015_Rap1_signaling_pathway	210	3.81	1.91	0.068386	0.164126	RAF1;ADCY3;MAPK12;EPHA2;PIK3CB;RGS14;KDR;EFNA1
hsa04662_B_cell_receptor_signaling_pathway	81	4.94	2.49	0.0849049	0.197198	RAF1;RELA;PIK3CB;INPP5D
hsa04390_Hippo_signaling_pathway	157	3.82	1.91	0.104561	0.235262	ID2;DVL2;BIRC2;BMPR1A;BMP7;RASSF1
hsa04020_Calcium_signaling_pathway	201	3.48	1.73	0.120379	0.262417	EDNRB;CXCR4;ADCY3;EDNRA;ADRA1B;ATP2A1;CCKBR
hsa04912_GnRH_signaling_pathway	93	4.3	2.16	0.123919	0.262417	RAF1;ADCY3;MAPK12;PLD2
hsa04130_SNARE_interactions_in_vesicular_transport	33	6.06	3.09	0.146285	0.300929	STX1A;VAMP1
hsa04080_Neuroactive_ligand-receptor_interaction	341	2.93	1.45	0.16467	0.3222	EDNRB;ADCYAP1;GABRQ;EDNRA;GLRA1;SST;ADRA1B;GPR50;CCKBR;UTS2
hsa04621_NOD-like_receptor_signaling_pathway	180	3.33	1.66	0.165575	0.3222	GABARAPL1;TXNIP;BIRC2;RELA;MAPK12;CXCL1
hsa04066_HIF-1_signaling_pathway	109	3.67	1.83	0.185283	0.347041	STAT3;RELA;PIK3CB;HMOX1
hsa04072_Phospholipase_D_signaling_pathway	148	3.38	1.68	0.187981	0.347041	RAF1;CYTH2;ADCY3;PIK3CB;PLD2
hsa04150_mTOR_signaling_pathway	155	3.23	1.6	0.213083	0.377344	RAF1;SLC3A2;SLC7A5;DVL2;PIK3CB
hsa04721_Synaptic_vesicle_cycle	78	3.85	1.92	0.214876	0.377344	ATP6V0A1;SNAP25;STX1A
hsa02010_ABC_transporters	45	4.44	2.23	0.235209	0.403215	ABCD4;ABCC10
hsa04060_Cytokine-cytokine_receptor_interaction	294	2.72	1.34	0.257054	0.430416	CXCR4;IL6ST;BMPR1A;BMP7;RELT;ACVR1;IL13RA2;CXCL1
hsa04371_Apelin_signaling_pathway	137	2.92	1.44	0.308989	0.483635	RAF1;GNG4;GABARAPL1;ADCY3
hsa04910_Insulin_signaling_pathway	137	2.92	1.44	0.308989	0.483635	EXOC7;RAF1;SOCS2;PIK3CB
hsa04915_Estrogen_signaling_pathway	137	2.92	1.44	0.308989	0.483635	RAF1;FKBP4;ADCY3;PIK3CB
hsa04070_Phosphatidylinositol_signaling_system	97	3.09	1.53	0.319817	0.489932	PIK3CB;INPP1;INPP5D
hsa04061_Viral_protein_interaction_with_cytokine_and_cytokine_receptor	100	3	1.48	0.336655	0.504982	CXCR4;IL6ST;CXCL1
hsa04064_NF-kappa_B_signaling_pathway	104	2.88	1.42	0.359063	0.508292	BIRC2;RELA;CXCL1
hsa04620_Toll-like_receptor_signaling_pathway	104	2.88	1.42	0.359063	0.508292	RELA;MAPK12;PIK3CB
hsa04723_Retrograde_endocannabinoid_signaling	148	2.7	1.33	0.36004	0.508292	GNG4;ADCY3;MAPK12;GABRQ
hsa04922_Glucagon_signaling_pathway	107	2.8	1.38	0.375801	0.520339	CRTC2;SIK1B;SIK1
hsa04310_Wnt_signaling_pathway	160	2.5	1.23	0.415597	0.523375	TP53;DVL2;RSPO3;SFRP4
hsa04622_RIG-I-like_receptor_signaling_pathway	70	2.86	1.41	0.421607	0.523375	RELA;MAPK12
hsa04724_Glutamatergic_synapse	114	2.63	1.29	0.41446	0.523375	GNG4;ADCY3;PLD2
hsa04725_Cholinergic_synapse	113	2.65	1.31	0.40898	0.523375	GNG4;ADCY3;PIK3CB
hsa04920_Adipocytokine_signaling_pathway	69	2.9	1.43	0.414509	0.523375	STAT3;RELA
hsa04921_Oxytocin_signaling_pathway	154	2.6	1.28	0.387901	0.523375	RAF1;CACNB3;ADCY3;RGS2
hsa04152_AMPK_signaling_pathway	120	2.5	1.23	0.446976	0.541835	FOXO3;CRTC2;PIK3CB
hsa04392_Hippo_signaling_pathway	29	3.45	1.71	0.451529	0.541835	RASSF1
hsa04728_Dopaminergic_synapse	132	2.27	1.11	0.509638	0.60154	GNG4;MAPK12;TH
hsa04512_ECM-receptor_interaction	88	2.27	1.11	0.540878	0.628117	SV2C;ITGA7
hsa04672_Intestinal_immune_network_for_IgA_production	47	2.13	1.04	0.622336	0.711242	CXCR4
hsa04340_Hedgehog_signaling_pathway	50	2	0.98	0.645116	0.725756	CSNK1G1
hsa04726_Serotonergic_synapse	113	1.77	0.86	0.676347	0.737833	RAF1;GNG4
hsa04961_Endocrine_and_other_factor-regulated_calcium_reabsorption	53	1.89	0.92	0.666524	0.737833	ATP1B1
hsa03013_RNA_transport	184	1.63	0.79	0.730162	0.784651	FXR1;NUP210;AAAS
hsa03320_PPAR_signaling_pathway	77	1.3	0.63	0.797335	0.844237	ILK
hsa04610_Complement_and_coagulation_cascades	85	1.18	0.57	0.828351	0.864366	PLAUR
hsa03022_Basal_transcription_factors	45	0	0	1	1
hsa05320_Autoimmune_thyroid_disease	51	0	0	1	1
hsa05340_Primary_immunodeficiency	38	0	0	1	1
